# Supplementary material for: The unfinished agenda of communicable diseases among children and adolescents before the COVID-19 pandemic, 1990–2019: a systematic analysis of the Global Burden of Disease Study 2019
Source: PubMed Central journal article supplement (PMC10375221; doi:10.1016/s0140-6736(23)00860-7), 2023-07-22
Supplement: mmc1.pdf [file mmc1.pdf]

# THE LANCET

## Supplementary appendix

This appendix formed part of the original submission and has been peer reviewed. We post it as supplied by the authors.

Supplement to: GBD 2019 Child and Adolescent Communicable Disease Collaborators. The unfinished agenda of communicable diseases among children and adolescents before the COVID-19 pandemic, 1990–2019: a systematic analysis of the Global Burden of Disease Study 2019. *Lancet* 2023; published online June 29. [https://doi.org/10.1016/S0140-6736\(23\)00860-7](https://doi.org/10.1016/S0140-6736(23)00860-7).

## Supplementary appendix

**Supplement to:** The unfinished agenda of communicable diseases amongst children and adolescents prior to the COVID-19 pandemic: A systematic analysis of the Global Burden of Disease study from 1990 to 2019.

| <b>Table/ Figure</b>                                                                                                                                                                               | <b>Page number</b> |
|----------------------------------------------------------------------------------------------------------------------------------------------------------------------------------------------------|--------------------|
| <b>S1.</b> Table of country names and SDI classification                                                                                                                                           | 1                  |
| <b>S2.</b> Global Burden of Disease cause list and codes                                                                                                                                           | 5                  |
| <b>S3.</b> Causes of total Years Lived with Disability (YLDs) and Years of Life Lost (YLLs, mortality) as a percentage of total DALYs by age (0-24 years) and reflected by sex, across SDI in 2019 | 7                  |
| <b>S4.</b> Age and sex-specific estimates of deaths (all-cause and communicable-disease specific) and DALYs (all-cause and communicable-disease specific), by SDI in 2019.                         | 8                  |
| <b>S5a.</b> Incidence in 2019, incidence/100,000 in 2019 and change in incidence/100,000 from 1990-2019, in 0-24 year olds by SDI groups, and globally                                             | 11                 |
| <b>S5b.</b> Incidence in 2019, incidence/100,000 in 2019 and change in incidence/100,000 from 1990-2019, for under 5, 5-9, 10-14, 15-19, 20-24, 0-24 year olds                                     | 12                 |
| <b>S6a.</b> Number of YLDs in 2019, YLD /100,000 in 2019 and change in YLDs/100,000 from 1990-2019, in 0-24 year olds by SDI groups                                                                | 13                 |
| <b>S6b.</b> Number of YLDs in 2019, YLDs/100,000 in 2019 and change in YLDs/100,000 from 1990-2019, for under 5, 5-9, 10-14, 15-19, 20-24, 0-24 year olds                                          | 14                 |
| <b>S7a.</b> Number of deaths in 2019, deaths/100,000 in 2019 and change in deaths/100,000 from 1990-2019, in 0-24 year olds by SDI groups                                                          | 15                 |
| <b>S7b.</b> Number of deaths in 2019, deaths/100,000 in 2019 and change in deaths/100,000 from 1990-2019, for under 5, 5-9, 10-14, 15-19, 20-24, 0-24 year olds                                    | 16                 |
| <b>S8a.</b> Number of DALYs in 2019, DALY /100,000 in 2019 and change in DALYs/100,000 from 1990-2019, in 0-24 year olds by SDI groups                                                             | 17                 |
| <b>S8b.</b> Number of DALYs in 2019, DALYs/100,000 in 2019 and change in DALYs/100,000 from 1990-2019, for under 5, 5-9, 10-14, 15-19, 20-24, 0-24 year olds                                       | 18                 |
| <b>S9.</b> Proportion of communicable disease DALYs and deaths in 2019 attributed by each specific cause, by age, sex and SDI                                                                      | 19                 |
| <b>S10</b> Communicable disease burden (DALYs) among 0-24-year-olds borne by each age group over time as (A) proportion (B) number.                                                                | 20                 |
| <b>S11</b> Deaths among 0-24-year-olds borne by each age group over time as (A) proportion (B) number.                                                                                             | 21                 |
| <b>S12. (A)</b> Communicable disease DALYs by cause for under 5 year olds by sex in 2019, grouped by SDI.                                                                                          | 22                 |
| <b>(B)</b> Percentage change in DALYs/100,000 for each communicable condition for each location for under 5 year olds by sex.                                                                      | 27                 |
| <b>S13. (A)</b> Communicable disease DALYs by cause for 5-14 year age group by sex in 2019, grouped by SDI.                                                                                        | 32                 |
| <b>(B)</b> Percentage change in DALYs/100,000 for each communicable condition for each location for 5-14 year age group by sex                                                                     | 37                 |
| <b>S14. (A)</b> Communicable disease DALYs by cause for 15-24 year age group by sex in 2019, grouped by SDI.                                                                                       | 42                 |
| <b>(B)</b> Percentage change in DALYs/100,000 for each communicable condition for each location for 15-24 year age group by sex                                                                    | 47                 |

|                                                                                                                                                                                                                                                                                                                                                                                                                                                                                                                                                                                                                                                                                                                                                                                                                            |     |
|----------------------------------------------------------------------------------------------------------------------------------------------------------------------------------------------------------------------------------------------------------------------------------------------------------------------------------------------------------------------------------------------------------------------------------------------------------------------------------------------------------------------------------------------------------------------------------------------------------------------------------------------------------------------------------------------------------------------------------------------------------------------------------------------------------------------------|-----|
| <b>S15. (A)</b> Percentage change in DALYs/100,000 for each communicable condition for each location for 0-24 year old age group by sex.                                                                                                                                                                                                                                                                                                                                                                                                                                                                                                                                                                                                                                                                                   | 52  |
| <b>S16:</b> Relationship between enteric and lower respiratory tract disease burden for 0-24 year olds by country, 2019.                                                                                                                                                                                                                                                                                                                                                                                                                                                                                                                                                                                                                                                                                                   | 57  |
| <b>S17 (1 to 16):</b> For each communicable condition: Enteric infections, Hepatitis, HIV, Infectious skin conditions, Lower respiratory infections, Malaria, Maternal sepsis and other maternal infections, Meningitis & Encephalitis, Neglected Tropical Diseases, Neonatal sepsis and other neonatal infections, Other unspecified infectious diseases, Rheumatic heart disease, Sexually transmitted infections excluding HIV, Tuberculosis, Upper respiratory infections, Vaccine preventable diseases<br><br><b>Part A:</b> Incidence, YLD, death and DALY per 100 000 in 2019 for each age group and rate of change in YLD and deaths for each age group from 1990-2019<br><br><b>Part B:</b> Contribution of individual causes to the 2019 death/100,000 and DALYs/100,000 for the each communicable disease group | 58  |
| <b>S18.</b> HIV mortality to incidence ratio for males and females, aged <5 years, 15-19 and 20-24, in 2019.                                                                                                                                                                                                                                                                                                                                                                                                                                                                                                                                                                                                                                                                                                               | 84  |
| <b>S19.</b> Incidence mortality ratio by location for HIV, for females and males aged less than 5 years, 15 to 19 years and 20 to 24 years                                                                                                                                                                                                                                                                                                                                                                                                                                                                                                                                                                                                                                                                                 | 85  |
| <b>S20 (1 to 10).</b> Uncertainty ranges for (part A) deaths/100,000 and (part B) DALYs/100,000, for each country, for under 5, 5-9, 10-14, 15-19, 20-24, for:<br><br>Enteric infections, HIV, Lower respiratory infections, Malaria, Maternal sepsis and other maternal infections, Neonatal sepsis and other neonatal infections, Other unspecified infectious diseases, Rheumatic heart disease, Sexually transmitted infections excluding HIV, and Tuberculosis<br><br>All UI data is available at: <a href="https://vizhub.healthdata.org/gbd-results/">https://vizhub.healthdata.org/gbd-results/</a>                                                                                                                                                                                                                | 87  |
| <b>S21.</b> Author contributions                                                                                                                                                                                                                                                                                                                                                                                                                                                                                                                                                                                                                                                                                                                                                                                           | 167 |

**S1: List of the 204 country/ territories and their SDI classification in 2019**

---

|                                       |                |
|---------------------------------------|----------------|
| Afghanistan                           | Low SDI        |
| Benin                                 | Low SDI        |
| Burkina Faso                          | Low SDI        |
| Burundi                               | Low SDI        |
| Central African Republic              | Low SDI        |
| Chad                                  | Low SDI        |
| Côte d'Ivoire                         | Low SDI        |
| Democratic Republic of the Congo      | Low SDI        |
| Eritrea                               | Low SDI        |
| Ethiopia                              | Low SDI        |
| Gambia                                | Low SDI        |
| Guinea                                | Low SDI        |
| Guinea-Bissau                         | Low SDI        |
| Haiti                                 | Low SDI        |
| Liberia                               | Low SDI        |
| Madagascar                            | Low SDI        |
| Malawi                                | Low SDI        |
| Mali                                  | Low SDI        |
| Mozambique                            | Low SDI        |
| Nepal                                 | Low SDI        |
| Niger                                 | Low SDI        |
| Pakistan                              | Low SDI        |
| Papua New Guinea                      | Low SDI        |
| Rwanda                                | Low SDI        |
| Senegal                               | Low SDI        |
| Sierra Leone                          | Low SDI        |
| Solomon Islands                       | Low SDI        |
| Somalia                               | Low SDI        |
| South Sudan                           | Low SDI        |
| Togo                                  | Low SDI        |
| Uganda                                | Low SDI        |
| United Republic of Tanzania           | Low SDI        |
| Yemen                                 | Low SDI        |
| <hr/>                                 |                |
| Angola                                | Low-middle SDI |
| Bangladesh                            | Low-middle SDI |
| Belize                                | Low-middle SDI |
| Bhutan                                | Low-middle SDI |
| Bolivia (Plurinational State of)      | Low-middle SDI |
| Cabo Verde                            | Low-middle SDI |
| Cambodia                              | Low-middle SDI |
| Cameroon                              | Low-middle SDI |
| Comoros                               | Low-middle SDI |
| Congo                                 | Low-middle SDI |
| Democratic People's Republic of Korea | Low-middle SDI |
| Djibouti                              | Low-middle SDI |
| Dominican Republic                    | Low-middle SDI |
| El Salvador                           | Low-middle SDI |
| Eswatini                              | Low-middle SDI |
| Ghana                                 | Low-middle SDI |
| Guatemala                             | Low-middle SDI |
| Honduras                              | Low-middle SDI |

|                                    |                |
|------------------------------------|----------------|
| India                              | Low-middle SDI |
| Kenya                              | Low-middle SDI |
| Kiribati                           | Low-middle SDI |
| Kyrgyzstan                         | Low-middle SDI |
| Lao People's Democratic Republic   | Low-middle SDI |
| Lesotho                            | Low-middle SDI |
| Maldives                           | Low-middle SDI |
| Marshall Islands                   | Low-middle SDI |
| Mauritania                         | Low-middle SDI |
| Micronesia (Federated States of)   | Low-middle SDI |
| Mongolia                           | Low-middle SDI |
| Morocco                            | Low-middle SDI |
| Myanmar                            | Low-middle SDI |
| Nicaragua                          | Low-middle SDI |
| Nigeria                            | Low-middle SDI |
| Palestine                          | Low-middle SDI |
| Sao Tome and Principe              | Low-middle SDI |
| Sudan                              | Low-middle SDI |
| Tajikistan                         | Low-middle SDI |
| Timor-Leste                        | Low-middle SDI |
| Tuvalu                             | Low-middle SDI |
| Vanuatu                            | Low-middle SDI |
| Venezuela (Bolivarian Republic of) | Low-middle SDI |
| Zambia                             | Low-middle SDI |
| Zimbabwe                           | Low-middle SDI |
| <hr/>                              |                |
| Albania                            | Middle SDI     |
| Algeria                            | Middle SDI     |
| Armenia                            | Middle SDI     |
| Azerbaijan                         | Middle SDI     |
| Botswana                           | Middle SDI     |
| Brazil                             | Middle SDI     |
| China                              | Middle SDI     |
| Colombia                           | Middle SDI     |
| Costa Rica                         | Middle SDI     |
| Cuba                               | Middle SDI     |
| Ecuador                            | Middle SDI     |
| Egypt                              | Middle SDI     |
| Equatorial Guinea                  | Middle SDI     |
| Fiji                               | Middle SDI     |
| Gabon                              | Middle SDI     |
| Grenada                            | Middle SDI     |
| Guyana                             | Middle SDI     |
| Indonesia                          | Middle SDI     |
| Iran (Islamic Republic of)         | Middle SDI     |
| Iraq                               | Middle SDI     |
| Jamaica                            | Middle SDI     |
| Mexico                             | Middle SDI     |
| Namibia                            | Middle SDI     |
| Nauru                              | Middle SDI     |
| Panama                             | Middle SDI     |
| Paraguay                           | Middle SDI     |
| Peru                               | Middle SDI     |

|                                  |                 |
|----------------------------------|-----------------|
| Philippines                      | Middle SDI      |
| Saint Lucia                      | Middle SDI      |
| Saint Vincent and the Grenadines | Middle SDI      |
| Samoa                            | Middle SDI      |
| South Africa                     | Middle SDI      |
| Suriname                         | Middle SDI      |
| Syrian Arab Republic             | Middle SDI      |
| Thailand                         | Middle SDI      |
| Tokelau                          | Middle SDI      |
| Tonga                            | Middle SDI      |
| Tunisia                          | Middle SDI      |
| Turkmenistan                     | Middle SDI      |
| Uzbekistan                       | Middle SDI      |
| Viet Nam                         | Middle SDI      |
| <hr/>                            |                 |
| American Samoa                   | High-middle SDI |
| Antigua and Barbuda              | High-middle SDI |
| Argentina                        | High-middle SDI |
| Bahamas                          | High-middle SDI |
| Bahrain                          | High-middle SDI |
| Barbados                         | High-middle SDI |
| Belarus                          | High-middle SDI |
| Bosnia and Herzegovina           | High-middle SDI |
| Bulgaria                         | High-middle SDI |
| Chile                            | High-middle SDI |
| Cook Islands                     | High-middle SDI |
| Croatia                          | High-middle SDI |
| Dominica                         | High-middle SDI |
| Georgia                          | High-middle SDI |
| Greece                           | High-middle SDI |
| Greenland                        | High-middle SDI |
| Hungary                          | High-middle SDI |
| Israel                           | High-middle SDI |
| Italy                            | High-middle SDI |
| Jordan                           | High-middle SDI |
| Kazakhstan                       | High-middle SDI |
| Lebanon                          | High-middle SDI |
| Libya                            | High-middle SDI |
| Malaysia                         | High-middle SDI |
| Malta                            | High-middle SDI |
| Mauritius                        | High-middle SDI |
| Montenegro                       | High-middle SDI |
| Niue                             | High-middle SDI |
| North Macedonia                  | High-middle SDI |
| Northern Mariana Islands         | High-middle SDI |
| Oman                             | High-middle SDI |
| Palau                            | High-middle SDI |
| Poland                           | High-middle SDI |
| Portugal                         | High-middle SDI |
| Republic of Moldova              | High-middle SDI |
| Romania                          | High-middle SDI |
| Russian Federation               | High-middle SDI |
| Saint Kitts and Nevis            | High-middle SDI |

|                              |                 |
|------------------------------|-----------------|
| Saudi Arabia                 | High-middle SDI |
| Serbia                       | High-middle SDI |
| Seychelles                   | High-middle SDI |
| Spain                        | High-middle SDI |
| Sri Lanka                    | High-middle SDI |
| Trinidad and Tobago          | High-middle SDI |
| Turkey                       | High-middle SDI |
| Ukraine                      | High-middle SDI |
| United States Virgin Islands | High-middle SDI |
| Uruguay                      | High-middle SDI |
| <hr/>                        |                 |
| Andorra                      | High SDI        |
| Australia                    | High SDI        |
| Austria                      | High SDI        |
| Belgium                      | High SDI        |
| Bermuda                      | High SDI        |
| Brunei Darussalam            | High SDI        |
| Canada                       | High SDI        |
| Cyprus                       | High SDI        |
| Czechia                      | High SDI        |
| Denmark                      | High SDI        |
| Estonia                      | High SDI        |
| Finland                      | High SDI        |
| France                       | High SDI        |
| Germany                      | High SDI        |
| Guam                         | High SDI        |
| Iceland                      | High SDI        |
| Ireland                      | High SDI        |
| Japan                        | High SDI        |
| Kuwait                       | High SDI        |
| Latvia                       | High SDI        |
| Lithuania                    | High SDI        |
| Luxembourg                   | High SDI        |
| Monaco                       | High SDI        |
| Netherlands                  | High SDI        |
| New Zealand                  | High SDI        |
| Norway                       | High SDI        |
| Puerto Rico                  | High SDI        |
| Qatar                        | High SDI        |
| Republic of Korea            | High SDI        |
| San Marino                   | High SDI        |
| Singapore                    | High SDI        |
| Slovakia                     | High SDI        |
| Slovenia                     | High SDI        |
| Sweden                       | High SDI        |
| Switzerland                  | High SDI        |
| Taiwan (Province of China)   | High SDI        |
| United Arab Emirates         | High SDI        |
| United Kingdom               | High SDI        |
| United States of America     | High SDI        |



**S2: Global Burden of disease cause list for Communicable, maternal, neonatal and nutritional diseases with the group allocation for the current paper**

| <b>GBD disease</b>                                                            | <b>GBD code</b> | <b>Communicable group</b> |
|-------------------------------------------------------------------------------|-----------------|---------------------------|
| <b>Communicable, maternal, neonatal, and nutritional diseases</b>             | <b>A</b>        |                           |
| <b>HIV/AIDS and sexually transmitted infections</b>                           | <b>A.1</b>      |                           |
| HIV/AIDS                                                                      | A.1.1           |                           |
| HIV/AIDS - Drug-susceptible Tuberculosis                                      | A.1.1.1         | HIV                       |
| HIV/AIDS - Multidrug-resistant Tuberculosis without extensive drug resistance | A.1.1.2         | HIV                       |
| HIV/AIDS - Extensively drug-resistant Tuberculosis                            | A.1.1.3         | HIV                       |
| HIV/AIDS resulting in other diseases                                          | A.1.1.4         | HIV                       |
| Sexually transmitted infections excluding HIV                                 | A.1.2           |                           |
| Syphilis                                                                      | A.1.2.1         | STI                       |
| Chlamydial infection                                                          | A.1.2.2         | STI                       |
| Gonococcal infection                                                          | A.1.2.3         | STI                       |
| Trichomoniasis                                                                | A.1.2.4         | STI                       |
| Genital herpes                                                                | A.1.2.5         | STI                       |
| Other sexually transmitted infections                                         | A.1.2.6         | STI                       |
| <b>Respiratory infections and tuberculosis</b>                                | <b>A.2</b>      |                           |
| Tuberculosis                                                                  | A.2.1           |                           |
| Latent tuberculosis infection                                                 | A.2.1.1         | TB                        |
| Drug-susceptible tuberculosis                                                 | A.2.1.2         | TB                        |
| Multidrug-resistant tuberculosis without extensive drug resistance            | A.2.1.3         | TB                        |
| Extensively drug-resistant tuberculosis                                       | A.2.1.4         | TB                        |
| Lower respiratory infections                                                  | A.2.2           | LRI                       |
| Upper respiratory infections                                                  | A.2.3           | URI                       |
| Otitis media                                                                  | A.2.4           | URI                       |
| <b>Enteric infections</b>                                                     | <b>A.3</b>      |                           |
| Diarrheal diseases                                                            | A.3.1           | Enteric infections        |
| Typhoid and paratyphoid                                                       | A.3.2           |                           |
| Typhoid fever                                                                 | A.3.2.1         | Enteric infections        |
| Paratyphoid fever                                                             | A.3.2.2         | Enteric infections        |
| Invasive Non-typhoidal Salmonella (iNTS)                                      | A.3.3           | Enteric infections        |
| Other intestinal infectious diseases                                          | A.3.5           | Enteric infections        |
| <b>Neglected tropical diseases and malaria</b>                                | <b>A.4</b>      |                           |
| Malaria                                                                       | A.4.1           | Malaria                   |
| Chagas disease                                                                | A.4.2           | NTD                       |
| Leishmaniasis                                                                 | A.4.3           | NTD                       |
| African trypanosomiasis                                                       | A.4.4           | NTD                       |
| Schistosomiasis                                                               | A.4.5           | NTD                       |
| Cysticercosis                                                                 | A.4.6           | NTD                       |
| Cystic echinococcosis                                                         | A.4.7           | NTD                       |
| Lymphatic filariasis                                                          | A.4.8           | NTD                       |
| Onchocerciasis                                                                | A.4.9           | NTD                       |
| Trachoma                                                                      | A.4.10          | NTD                       |
| Dengue                                                                        | A.4.11          | NTD                       |
| Yellow fever                                                                  | A.4.12          | NTD                       |
| Rabies                                                                        | A.4.13          | NTD                       |
| Intestinal nematode infections                                                | A.4.14          | NTD                       |
| Food-borne trematodiasis                                                      | A.4.15          | NTD                       |

|                                                               |            |                                       |
|---------------------------------------------------------------|------------|---------------------------------------|
| Leprosy                                                       | A.4.16     | NTD                                   |
| Ebola                                                         | A.4.17     | NTD                                   |
| Zika virus                                                    | A.4.18     | NTD                                   |
| Guinea worm disease                                           | A.4.19     | NTD                                   |
| Other neglected tropical diseases                             | A.4.20     | NTD                                   |
| <b>Other infectious diseases</b>                              | <b>A.5</b> |                                       |
| Meningitis                                                    | A.5.1      | Meningitis/Encephalitis               |
| Encephalitis                                                  | A.5.2      | Meningitis/Encephalitis               |
| Diphtheria                                                    | A.5.3      | VPD                                   |
| Whooping cough                                                | A.5.4      | VPD                                   |
| Tetanus                                                       | A.5.5      | VPD                                   |
| Measles                                                       | A.5.6      | VPD                                   |
| Varicella and herpes zoster                                   | A.5.7      | VPD                                   |
| Acute hepatitis                                               | A.5.8      |                                       |
| Acute hepatitis A                                             | A.5.8.1    | Hepatitis                             |
| Acute hepatitis B                                             | A.5.8.2    | Hepatitis                             |
| Acute hepatitis C                                             | A.5.8.3    | Hepatitis                             |
| Acute hepatitis E                                             | A.5.8.4    | Hepatitis                             |
| Other unspecified infectious diseases                         | A.5.9      | Other unspecified infectious diseases |
| <b>Maternal and neonatal disorders</b>                        | <b>A.6</b> |                                       |
| Maternal sepsis and other maternal infections                 | A.6.1.2    | Maternal sepsis & other infections    |
| Neonatal sepsis and other neonatal infections                 | A.6.2.3    | Neonatal sepsis & other infections    |
| <b>Nutritional deficiencies</b>                               | <b>A.7</b> |                                       |
| <b>Non-communicable diseases</b>                              | <b>B</b>   |                                       |
| <b>Neoplasms</b>                                              | <b>B.1</b> |                                       |
| <b>Cardiovascular diseases</b>                                | <b>B.2</b> |                                       |
| Rheumatic heart disease                                       | B.2.1      |                                       |
| Chronic respiratory diseases                                  | B.3        |                                       |
| Digestive diseases                                            | B.4        |                                       |
| Neurological disorders                                        | B.5        |                                       |
| Mental disorders                                              | B.6        |                                       |
| Substance use disorders                                       | B.7        |                                       |
| Liver cancer due to hepatitis B                               | B.1.7.1    | Hepatitis                             |
| Liver cancer due to hepatitis C                               | B.1.7.2    | Hepatitis                             |
| Cirrhosis and other chronic liver diseases due to hepatitis B | B.4.1.1    | Hepatitis                             |
| Cirrhosis and other chronic liver diseases due to hepatitis C | B.4.1.2    | Hepatitis                             |
| Diabetes and kidney diseases                                  | B.8        |                                       |
| <b>Skin and subcutaneous diseases</b>                         | <b>B.9</b> |                                       |
| Bacterial skin diseases                                       | B.9.3      | Infectious skin conditions            |
| Scabies                                                       | B.9.4      | Infectious skin conditions            |
| Fungal skin diseases                                          | B.9.5      | Infectious skin conditions            |
| Viral skin diseases                                           | B.9.6      | Infectious skin conditions            |
| Sense organ diseases                                          | B.10       |                                       |
| Musculoskeletal disorders                                     | B.11       |                                       |
| Other non-communicable diseases                               | B.12       |                                       |
| <b>Injuries</b>                                               | <b>C</b>   |                                       |
| Transport injuries                                            | C.1        |                                       |
| Unintentional injuries                                        | C.2        |                                       |
| Self-harm* and interpersonal violence                         | C.3        |                                       |

\*Self harm is grouped with NCD and not injury for this paper

**S3.** Causes of total Years Lived with Disability (YLDs) and Years of Life Lost (YLLs, mortality) as a percentage of total DALYs by age (0-24 years) and reflected by sex, across SDI in 2019.

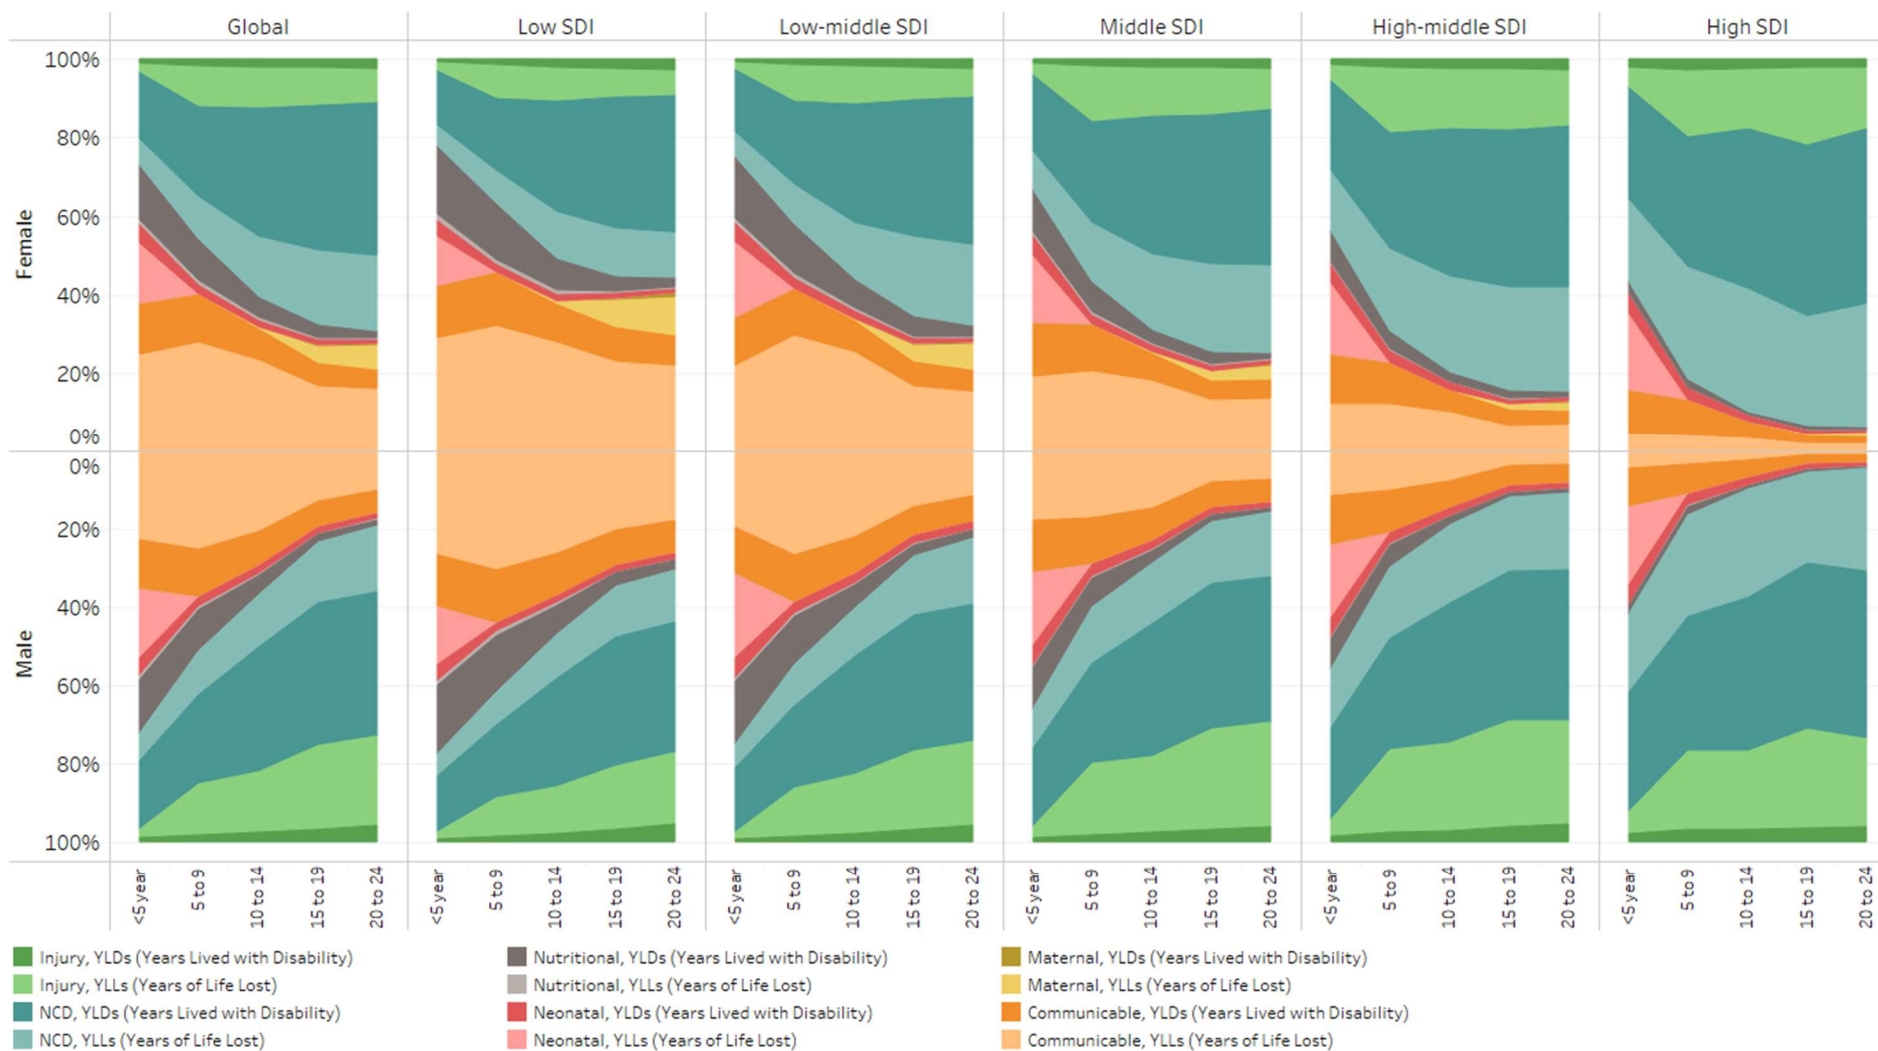

S4. Age and sex-specific estimates of deaths (all-cause and communicable-disease specific) and DALYs (all-cause and communicable-disease specific), by SDI in 2019.

|                | Age (yrs)      | Sex    | Population         | All cause deaths   | Deaths due to communicable disease | Proportion of deaths due to communicable disease (%) | All cause DALYs    | DALYs due to communicable disease | Proportion of DALYs due to communicable disease (%) |
|----------------|----------------|--------|--------------------|--------------------|------------------------------------|------------------------------------------------------|--------------------|-----------------------------------|-----------------------------------------------------|
| Low SDI        | <5             | Female | 83,700,856         | 1,225,678          | 712,764                            | 58.2                                                 | 112,155,912        | 63,558,180                        | 56.7                                                |
|                | <5             | Male   | 87,154,512         | 1,445,802          | 772,268                            | 53.4                                                 | 131,981,608        | 68,866,531                        | 52.2                                                |
|                | 5 to 9         | Female | 77,689,352         | 70,355             | 45,143                             | 64.2                                                 | 10,116,425         | 4,890,860                         | 48.3                                                |
|                | 5 to 9         | Male   | 80,523,872         | 89,041             | 54,629                             | 61.4                                                 | 11,962,074         | 5,750,997                         | 48.1                                                |
|                | 10 to 14       | Female | 70,748,832         | 46,198             | 25,897                             | 56.1                                                 | 8,142,353          | 2,892,205                         | 35.5                                                |
|                | 10 to 14       | Male   | 73,058,320         | 59,902             | 31,575                             | 52.7                                                 | 8,972,512          | 3,362,453                         | 37.5                                                |
|                | 15 to 19       | Female | 61,503,536         | 61,558             | 28,429                             | 46.2                                                 | 9,340,045          | 2,899,571                         | 31.0                                                |
|                | 15 to 19       | Male   | 62,583,668         | 86,489             | 35,429                             | 41.0                                                 | 10,219,094         | 3,246,351                         | 31.8                                                |
|                | 20 to 24       | Female | 52,213,808         | 72,856             | 32,198                             | 44.2                                                 | 9,862,753          | 2,913,059                         | 29.5                                                |
|                | 20 to 24       | Male   | 51,377,092         | 101,152            | 36,473                             | 36.1                                                 | 10,418,173         | 3,049,982                         | 29.3                                                |
|                | ≥25            | Female | 216,656,448        | 2,070,177          | 636,248                            | 30.7                                                 | 92,054,952         | 23,523,064                        | 25.6                                                |
|                | ≥25            | Male   | 211,466,352        | 2,418,497          | 773,816                            | 32.0                                                 | 97,953,504         | 28,583,548                        | 29.2                                                |
|                | <b>0 to 24</b> |        |                    | <b>700,553,840</b> | <b>3,259,029</b>                   | <b>1,774,805</b>                                     | <b>54.5</b>        | <b>323,170,950</b>                | <b>161,430,189</b>                                  |
| <b>0 to 24</b> |                |        | <b>345,856,384</b> | <b>1,476,645</b>   | <b>844,431</b>                     | <b>57.2</b>                                          | <b>149,617,488</b> | <b>77,153,876</b>                 | <b>51.6</b>                                         |
| <b>0 to 24</b> |                |        | <b>354,697,464</b> | <b>1,782,384</b>   | <b>930,373</b>                     | <b>52.2</b>                                          | <b>173,553,461</b> | <b>84,276,313</b>                 | <b>48.6</b>                                         |
| Low-middle SDI | <5             | Female | 83,335,704         | 692,997            | 305,715                            | 44.1                                                 | 64,724,548         | 27,711,517                        | 42.8                                                |
|                | <5             | Male   | 88,963,320         | 792,339            | 314,554                            | 39.7                                                 | 73,915,512         | 28,565,644                        | 38.6                                                |
|                | 5 to 9         | Female | 84,623,288         | 57,546             | 34,126                             | 59.3                                                 | 8,664,503          | 3,753,306                         | 43.3                                                |
|                | 5 to 9         | Male   | 89,890,128         | 64,778             | 34,580                             | 53.4                                                 | 9,631,233          | 3,876,891                         | 40.3                                                |
|                | 10 to 14       | Female | 85,910,840         | 46,120             | 23,483                             | 50.9                                                 | 8,651,091          | 2,647,021                         | 30.6                                                |
|                | 10 to 14       | Male   | 90,825,264         | 57,341             | 25,274                             | 44.1                                                 | 9,142,098          | 2,826,780                         | 30.9                                                |
|                | 15 to 19       | Female | 84,247,840         | 74,141             | 25,166                             | 33.9                                                 | 11,801,465         | 2,598,388                         | 22.0                                                |
|                | 15 to 19       | Male   | 87,563,288         | 92,876             | 26,802                             | 28.9                                                 | 11,716,270         | 2,662,990                         | 22.7                                                |
|                | 20 to 24       | Female | 80,610,000         | 96,795             | 29,992                             | 31.0                                                 | 13,907,715         | 2,793,074                         | 20.1                                                |
|                | 20 to 24       | Male   | 81,268,272         | 133,584            | 31,347                             | 23.5                                                 | 14,273,909         | 2,800,729                         | 19.6                                                |
|                | ≥25            | Female | 458,777,088        | 4,703,324          | 984,382                            | 20.9                                                 | 188,698,720        | 31,280,331                        | 16.6                                                |
|                | ≥25            | Male   | 447,967,392        | 5,552,428          | 1,088,296                          | 19.6                                                 | 206,863,072        | 37,353,238                        | 18.1                                                |
|                | <b>0 to 24</b> |        |                    | <b>857,237,968</b> | <b>2,108,517</b>                   | <b>851,039</b>                                       | <b>40.4</b>        | <b>226,428,330</b>                | <b>80,236,339</b>                                   |
| <b>0 to 24</b> |                |        | <b>418,727,672</b> | <b>967,600</b>     | <b>418,482</b>                     | <b>43.2</b>                                          | <b>107,749,322</b> | <b>39,503,305</b>                 | <b>36.7</b>                                         |

|  |                |               |                    |                  |                |             |                    |                   |             |
|--|----------------|---------------|--------------------|------------------|----------------|-------------|--------------------|-------------------|-------------|
|  | <b>0 to 24</b> | <b>Male</b>   | <b>438,510,272</b> | <b>1,140,918</b> | <b>432,557</b> | <b>37.9</b> | <b>118,679,022</b> | <b>40,733,034</b> | <b>34.3</b> |
|  | <5             | Female        | 88,195,816         | 303,539          | 117,293        | 38.6        | 29,673,254         | 11,090,109        | 37.4        |
|  | <5             | Male          | 95,995,264         | 381,511          | 136,282        | 35.7        | 36,911,780         | 12,848,279        | 34.8        |
|  | 5 to 9         | Female        | 88,532,296         | 30,438           | 12,511         | 41.1        | 5,814,004          | 1,809,415         | 31.1        |
|  | 5 to 9         | Male          | 96,635,320         | 42,417           | 14,526         | 34.2        | 7,157,773          | 2,085,769         | 29.1        |
|  | 10 to 14       | Female        | 88,071,960         | 27,497           | 10,015         | 36.4        | 6,794,345          | 1,432,080         | 21.1        |
|  | 10 to 14       | Male          | 96,168,424         | 38,631           | 11,358         | 29.4        | 7,419,528          | 1,618,488         | 21.8        |
|  | 15 to 19       | Female        | 88,295,440         | 43,017           | 11,379         | 26.5        | 9,371,077          | 1,461,221         | 15.6        |
|  | 15 to 19       | Male          | 94,656,056         | 81,256           | 13,300         | 16.4        | 11,000,834         | 1,624,417         | 14.8        |
|  | 20 to 24       | Female        | 89,675,616         | 59,468           | 16,422         | 27.6        | 11,597,764         | 1,817,493         | 15.7        |
|  | 20 to 24       | Male          | 92,668,576         | 125,687          | 18,197         | 14.5        | 14,215,469         | 1,904,895         | 13.4        |
|  | ≥25            | Female        | 747,909,120        | 6,451,820        | 704,403        | 10.9        | 250,728,128        | 23,973,891        | 9.6         |
|  | ≥25            | Male          | 729,761,920        | 8,313,147        | 970,822        | 11.7        | 295,376,864        | 34,482,370        | 11.7        |
|  | <b>0 to 24</b> | <b>Both</b>   | <b>918,894,784</b> | <b>1,133,462</b> | <b>361,284</b> | <b>31.9</b> | <b>139,955,831</b> | <b>37,692,165</b> | <b>26.9</b> |
|  | <b>0 to 24</b> | <b>Female</b> | <b>442,771,128</b> | <b>463,959</b>   | <b>167,620</b> | <b>36.1</b> | <b>63,250,444</b>  | <b>17,610,318</b> | <b>27.8</b> |
|  | <b>0 to 24</b> | <b>Male</b>   | <b>476,123,640</b> | <b>669,503</b>   | <b>193,664</b> | <b>28.9</b> | <b>76,705,384</b>  | <b>20,081,847</b> | <b>26.2</b> |
|  | <5             | Female        | 39,467,708         | 66,277           | 16,285         | 24.6        | 6,987,966          | 1,723,311         | 24.7        |
|  | <5             | Male          | 43,167,628         | 83,476           | 19,295         | 23.1        | 8,641,924          | 2,021,288         | 23.4        |
|  | 5 to 9         | Female        | 39,132,164         | 7,001            | 1,695          | 24.2        | 1,865,445          | 417,461           | 22.4        |
|  | 5 to 9         | Male          | 42,695,556         | 10,694           | 2,170          | 20.3        | 2,317,001          | 488,878           | 21.1        |
|  | 10 to 14       | Female        | 38,573,080         | 6,650            | 1,327          | 20.0        | 2,489,718          | 332,428           | 13.4        |
|  | 10 to 14       | Male          | 42,182,176         | 10,333           | 1,598          | 15.5        | 2,651,519          | 377,259           | 14.2        |
|  | 15 to 19       | Female        | 39,707,344         | 11,742           | 1,575          | 13.4        | 3,667,815          | 341,546           | 9.3         |
|  | 15 to 19       | Male          | 43,040,240         | 27,188           | 2,121          | 7.8         | 4,313,348          | 391,446           | 9.1         |
|  | 20 to 24       | Female        | 43,350,672         | 16,235           | 2,222          | 13.7        | 4,750,821          | 412,725           | 8.7         |
|  | 20 to 24       | Male          | 46,897,140         | 48,333           | 3,563          | 7.4         | 6,194,820          | 512,729           | 8.3         |
|  | ≥25            | Female        | 515,667,136        | 5,272,776        | 279,979        | 5.3         | 172,418,272        | 8,548,008         | 5.0         |
|  | ≥25            | Male          | 496,523,008        | 6,029,484        | 407,924        | 6.8         | 199,688,416        | 14,042,752        | 7.0         |
|  | <b>0 to 24</b> | <b>Both</b>   | <b>418,213,712</b> | <b>287,928</b>   | <b>51,852</b>  | <b>18.0</b> | <b>43,880,376</b>  | <b>7,019,070</b>  | <b>16.0</b> |
|  | <b>0 to 24</b> | <b>Female</b> | <b>200,230,968</b> | <b>107,905</b>   | <b>23,105</b>  | <b>21.4</b> | <b>19,761,764</b>  | <b>3,227,471</b>  | <b>16.3</b> |
|  | <b>0 to 24</b> | <b>Male</b>   | <b>217,982,740</b> | <b>180,023</b>   | <b>28,747</b>  | <b>16.0</b> | <b>24,118,611</b>  | <b>3,791,599</b>  | <b>15.7</b> |
|  | <5             | Female        | 25,536,442         | 21,592           | 1,960          | 9.1         | 2,557,155          | 316,947           | 12.4        |
|  | <5             | Male          | 26,900,140         | 27,018           | 2,429          | 9.0         | 3,104,994          | 356,435           | 11.5        |
|  | 5 to 9         | Female        | 26,577,084         | 2,259            | 189            | 8.4         | 1,062,152          | 176,611           | 16.6        |
|  | 5 to 9         | Male          | 27,993,492         | 2,957            | 206            | 7.0         | 1,183,570          | 161,220           | 13.6        |
|  | 10 to 14       | Female        | 27,356,536         | 2,645            | 182            | 6.9         | 1,760,830          | 144,024           | 8.2         |

|                |               |                    |                |              |            |                   |                  |            |
|----------------|---------------|--------------------|----------------|--------------|------------|-------------------|------------------|------------|
| 10 to 14       | Male          | 28,898,388         | 3,759          | 192          | 5.1        | 1,698,805         | 137,408          | 8.1        |
| 15 to 19       | Female        | 27,819,738         | 6,393          | 255          | 4.0        | 2,989,746         | 131,512          | 4.4        |
| 15 to 19       | Male          | 29,745,708         | 14,305         | 286          | 2.0        | 3,094,497         | 128,101          | 4.1        |
| 20 to 24       | Female        | 29,745,528         | 9,614          | 422          | 4.4        | 4,037,312         | 145,609          | 3.6        |
| 20 to 24       | Male          | 31,972,158         | 28,207         | 546          | 1.9        | 4,606,728         | 147,446          | 3.2        |
| ≥25            | Female        | 370,639,488        | 4,273,239      | 298,855      | 7.0        | 132,660,552       | 5,438,734        | 4.1        |
| ≥25            | Male          | 360,200,096        | 4,502,127      | 346,468      | 7.7        | 140,535,808       | 7,540,147        | 5.4        |
| <b>0 to 24</b> | <b>Both</b>   | <b>282,545,216</b> | <b>118,748</b> | <b>6,669</b> | <b>5.6</b> | <b>26,095,788</b> | <b>1,845,313</b> | <b>7.1</b> |
| <b>0 to 24</b> | <b>Female</b> | <b>137,035,328</b> | <b>42,504</b>  | <b>3,008</b> | <b>7.1</b> | <b>12,407,194</b> | <b>914,703</b>   | <b>7.4</b> |
| <b>0 to 24</b> | <b>Male</b>   | <b>145,509,886</b> | <b>76,244</b>  | <b>3,660</b> | <b>4.8</b> | <b>13,688,595</b> | <b>930,610</b>   | <b>6.8</b> |

**S5a. Incidence in 2019, incidence/100,000 in 2019 and change in incidence/100,000 from 1990-2019, in 0-24 year olds by SDI groups, and globally**

|                                               |   | Low              | Low-Mid                       | Middle           | High-mid                      | High             | Global                        |                  |                               |                  |                               |             |                  |
|-----------------------------------------------|---|------------------|-------------------------------|------------------|-------------------------------|------------------|-------------------------------|------------------|-------------------------------|------------------|-------------------------------|-------------|------------------|
| Population in 2019                            | F | 345,856,384      | 418,727,616                   | 442,771,136      | 200,230,976                   | 137,035,328      | 1,545,586,048                 |                  |                               |                  |                               |             |                  |
|                                               | M | 354,697,440      | 438,510,272                   | 476,123,648      | 217,982,720                   | 145,509,888      | 1,633,832,448                 |                  |                               |                  |                               |             |                  |
|                                               |   | Number incidence | Incidence/100,000 (change/pa) | Number incidence | Incidence/100,000 (change/pa) | Number incidence | Incidence/100,000 (change/pa) | Number incidence | Incidence/100,000 (change/pa) | Number incidence | Incidence/100,000 (change/pa) |             |                  |
| Enteric infections                            | F | 410485860        | 118,686.8(-0.7%)              | 437648452        | 104,518.6(-1.0%)              | 323963560        | 73,167.3(-0.2%)               | 141422064        | 70,629.5(-0.1%)               | 57513069         | 41,969.5(0.3%)                | 1371894096  | 88,762.1(-0.4%)  |
|                                               | M | 425482376        | 119,956.4(-0.5%)              | 452228320        | 103,128.3(-0.8%)              | 356135872        | 74,799.0(-0.2%)               | 155834850        | 71,489.5(-0.1%)               | 67368094         | 46,297.9(0.1%)                | 1458042144  | 89,240.6(-0.2%)  |
| HIV/AIDS                                      | F | 130214.1341      | 37.6(-2.6%)                   | 87687.04414      | 20.9(-1.9%)                   | 103129.875       | 23.3(5.6%)                    | 13942.80518      | 7.0(3.8%)                     | 5092.974304      | 3.7(-0.2%)                    | 340332.1821 | 22.0(-1.3%)      |
|                                               | M | 61767.72751      | 17.4(-2.4%)                   | 46827.53643      | 10.7(-1.3%)                   | 75744.5332       | 15.9(4.5%)                    | 16267.4209       | 7.5(1.2%)                     | 8773.362045      | 6.0(-1.2%)                    | 209547.2337 | 12.8(-0.7%)      |
| Hepatitis                                     | F | 25048958         | 7,242.6(-0.6%)                | 24207298         | 5,781.2(-0.7%)                | 22099622         | 4,991.2(-0.9%)                | 8266557          | 4,128.5(-0.8%)                | 2965943.75       | 2,164.4(-0.5%)                | 82659384    | 5,348.1(-0.6%)   |
|                                               | M | 27081628         | 7,635.1(-0.6%)                | 26876016         | 6,128.9(-0.7%)                | 24609814         | 5,168.8(-1.0%)                | 9336816          | 4,283.3(-1.0%)                | 3250954.75       | 2,234.2(-0.7%)                | 91232144    | 5,583.9(-0.7%)   |
| Infectious skin conditions                    | F | 183383680        | 53,023.1(-0.1%)               | 195174784        | 46,611.4(-0.1%)               | 174206784        | 39,344.7(0.1%)                | 63339088         | 31,633.0(0.0%)                | 36262604         | 26,462.2(-0.2%)               | 652766528   | 42,234.2(0.2%)   |
|                                               | M | 202315632        | 57,038.9(-0.1%)               | 211057456        | 48,130.6(-0.0%)               | 198402976        | 41,670.5(0.1%)                | 74957296         | 34,386.8(0.0%)                | 42337780         | 29,096.2(-0.2%)               | 729522304   | 44,651.0(0.2%)   |
| Lower respiratory infections                  | F | 20642821         | 5,968.6(-1.5%)                | 19941027.5       | 4,762.3(-1.6%)                | 18908052.5       | 4,270.4(-1.5%)                | 6759061.5        | 3,375.6(-1.3%)                | 3688918.5        | 2,691.9(-0.4%)                | 69983776    | 4,528.0(-1.3%)   |
|                                               | M | 21858262.25      | 6,162.5(-1.4%)                | 23885605.75      | 5,447.0(-1.4%)                | 22248790.5       | 4,672.9(-1.3%)                | 7747938.375      | 3,554.4(-1.3%)                | 4015144.156      | 2,759.4(-0.4%)                | 79803745    | 4,884.5(-1.2%)   |
| Malaria                                       | F | 61718816.5       | 17,845.2(-1.5%)               | 23321358.25      | 5,569.6(-1.4%)                | 8793625.063      | 1,986.0(-0.7%)                | 599896.4141      | 299.6(-0.4%)                  | 180.9182262      | 0.1(-3.2%)                    | 94470303.5  | 6,112.3(-0.5%)   |
|                                               | M | 62341386         | 17,575.9(-1.5%)               | 23504971         | 5,360.2(-1.4%)                | 8903652.063      | 1,870.0(-0.7%)                | 588742.2734      | 270.1(-0.7%)                  | 215.1802807      | 0.1(-3.2%)                    | 95377068.5  | 5,837.6(-0.6%)   |
| Maternal sepsis & other maternal infections   | F | 3169880.316      | 916.5(-0.9%)                  | 3081629.168      | 736.0(-1.2%)                  | 2408292.688      | 543.9(-1.4%)                  | 859718.1519      | 429.4(-1.7%)                  | 428803.4849      | 312.9(-1.7%)                  | 9955345.441 | 644.1(-1.2%)     |
|                                               | M | 0                | 0.0(%)                        | 0                | 0.0(%)                        | 0                | 0.0(%)                        | 0                | 0.0(%)                        | 0                | 0.0(%)                        | 0           | 0.0(%)           |
| Meningitis & Encephalitis                     | F | 493144.1563      | 142.6(-1.6%)                  | 374609.8125      | 89.5(-1.7%)                   | 238338.9531      | 53.8(-1.3%)                   | 78698.92969      | 39.3(-1.2%)                   | 27716.25391      | 20.2(-1.5%)                   | 1213102.125 | 78.5(-1.2%)      |
|                                               | M | 570901.3125      | 161.0(-1.7%)                  | 408551.4688      | 93.2(-1.7%)                   | 280246.125       | 58.9(-1.4%)                   | 98238.02344      | 45.1(-1.3%)                   | 33071.82422      | 22.7(-1.5%)                   | 1391708.375 | 85.2(-1.3%)      |
| Neglected Tropical diseases                   | F | 2336491.5        | 675.6(-0.9%)                  | 5869181          | 1,401.7(-0.1%)                | 4241308.5        | 957.9(1.8%)                   | 1332857.375      | 665.7(3.9%)                   | 141284.6406      | 103.1(1.0%)                   | 13933122    | 901.5(0.7%)      |
|                                               | M | 2194134.5        | 618.6(-1.1%)                  | 5694843          | 1,298.7(-0.1%)                | 4234562.5        | 889.4(1.9%)                   | 1432657.5        | 657.2(4.5%)                   | 145012.1719      | 99.7(1.3%)                    | 13712658    | 839.3(0.7%)      |
| Neonatal sepsis & other neonatal infections   | F | 738003.8125      | 213.4(-0.4%)                  | 763512.0625      | 182.3(-0.2%)                  | 845412           | 190.9(0.2%)                   | 377716.0938      | 188.6(0.6%)                   | 64790.00391      | 47.3(-0.2%)                   | 2970031.5   | 192.2(0.1%)      |
|                                               | M | 772716.125       | 217.9(-0.5%)                  | 828348.625       | 188.9(-0.4%)                  | 1030298.25       | 216.4(-0.1%)                  | 426348.3125      | 195.6(0.2%)                   | 77281.375        | 53.1(-0.1%)                   | 3340035.5   | 204.4(-0.2%)     |
| Other unspecified infectious diseases         | F | 0                | 0.0(%)                        | 0                | 0.0(%)                        | 0                | 0.0(%)                        | 0                | 0.0(%)                        | 0                | 0.0(%)                        | 0           | 0.0(%)           |
|                                               | M | 0                | 0.0(%)                        | 0                | 0.0(%)                        | 0                | 0.0(%)                        | 0                | 0.0(%)                        | 0                | 0.0(%)                        | 0           | 0.0(%)           |
| Rheumatic heart disease                       | F | 364613.2949      | 105.4(0.5%)                   | 358265.9863      | 85.6(0.6%)                    | 233122.7422      | 52.7(0.1%)                    | 47479.13672      | 23.7(0.2%)                    | 1191.652924      | 0.9(0.2%)                     | 1005337.063 | 65.0(0.9%)       |
|                                               | M | 332141.041       | 93.6(0.5%)                    | 291587.9492      | 66.5(0.6%)                    | 218305.1895      | 45.9(0.0%)                    | 44370.41016      | 20.4(0.0%)                    | 1048.014206      | 0.7(0.1%)                     | 888044.0859 | 54.4(0.9%)       |
| Sexually transmitted infections excluding HIV | F | 18139102.13      | 5,244.7(0.2%)                 | 17355121.19      | 4,144.7(0.8%)                 | 20397162.67      | 4,606.7(-0.0%)                | 8452480.392      | 4,221.4(-0.1%)                | 3709436.341      | 2,706.9(-0.3%)                | 68115664.53 | 4,407.1(0.2%)    |
|                                               | M | 13409648.43      | 3,780.6(0.3%)                 | 17085405.66      | 3,896.2(0.5%)                 | 20783487.42      | 4,365.1(0.1%)                 | 8957064.403      | 4,109.1(0.1%)                 | 3586877.83       | 2,465.0(-0.1%)                | 63868825.96 | 3,909.1(0.2%)    |
| Tuberculosis                                  | F | 419828.4922      | 121.4(-1.4%)                  | 458456.2539      | 109.5(-1.6%)                  | 310747.4023      | 70.2(-1.6%)                   | 52932.72925      | 26.4(-1.8%)                   | 8002.725037      | 5.8(-2.1%)                    | 1250609.359 | 80.9(-1.4%)      |
|                                               | M | 350942.5586      | 98.9(-1.1%)                   | 354039.5449      | 80.7(-1.2%)                   | 286913.9238      | 60.3(-1.4%)                   | 61901.18799      | 28.4(-1.5%)                   | 8655.449127      | 5.9(-1.8%)                    | 1062973.82  | 65.1(-1.1%)      |
| Upper respiratory infections                  | F | 848377664        | 245,297.7(-0.1%)              | 1067516288       | 254,942.9(-0.0%)              | 1166728832       | 263,506.1(0.0%)               | 533899904        | 266,642.0(0.1%)               | 486919840        | 355,324.3(0.0%)               | 4106167296  | 265,670.6(-0.0%) |
|                                               | M | 885710208        | 249,708.7(-0.1%)              | 1153033088       | 262,943.2(-0.0%)              | 1302695936       | 273,604.5(-0.0%)              | 594819648        | 272,874.7(0.0%)               | 506252640        | 347,916.3(0.0%)               | 4445416960  | 272,085.3(-0.1%) |
| Vaccine Preventable disease                   | F | 15159104         | 4,383.1(-2.0%)                | 12666785         | 3,025.1(-2.2%)                | 12237409         | 2,763.8(-1.7%)                | 4881399          | 2,437.9(-1.3%)                | 2978366.25       | 2,173.4(-0.6%)                | 47956196    | 3,102.8(-1.7%)   |
|                                               | M | 14791477         | 4,170.2(-2.0%)                | 12787343         | 2,916.1(-2.2%)                | 12659454         | 2,658.9(-1.7%)                | 5155952          | 2,365.3(-1.3%)                | 3037466.25       | 2,087.5(-0.6%)                | 48464560    | 2,966.3(-1.7%)   |
| Total communicable                            | F | 1590608181       | 459,904.3(-0.4%)              | 1808824455       | 431,981.2(-0.4%)              | 1755715399       | 396,528.9(-0.1%)              | 770383795.5      | 384,747.6(-0.0%)              | 594715240.5      | 433,986.8(0.0%)               | 6524681124  | 422,149.3(-0.2%) |
|                                               | M | 1657273221       | 467,235.8(-0.4%)              | 1928082404       | 439,689.2(-0.3%)              | 1952566053       | 410,096.4(-0.1%)              | 859478089.9      | 394,287.3(-0.0%)              | 630123014.4      | 433,044.8(-0.0%)              | 7032332718  | 430,419.5(-0.1%) |

**SSb. Incidence in 2019, incidence/100,000 in 2019 and change in incidence/100,000 from 1990-2019, for under 5, 5-9, 10-14, 15-19, 20-24, 0-24 year olds**

| Age group                                     |   | Under 5          |                               | 5-9              |                               | 10-14            |                               | 15-19            |                               | 20-24            |                               | 0-24             |                               |
|-----------------------------------------------|---|------------------|-------------------------------|------------------|-------------------------------|------------------|-------------------------------|------------------|-------------------------------|------------------|-------------------------------|------------------|-------------------------------|
| Population in 2019                            |   | F 320,443,936    |                               | 316,754,496      |                               | 310,852,512      |                               | 301,758,880      |                               | 295,776,256      |                               | 1,545,586,048    |                               |
|                                               |   | M 342,398,752    |                               | 337,949,216      |                               | 331,334,176      |                               | 317,782,112      |                               | 304,368,224      |                               | 1,633,832,448    |                               |
|                                               |   | Number incidence | Incidence/100,000 (change/pa) | Number incidence | Incidence/100,000 (change/pa) | Number incidence | Incidence/100,000 (change/pa) | Number incidence | Incidence/100,000 (change/pa) | Number incidence | Incidence/100,000 (change/pa) | Number incidence | Incidence/100,000 (change/pa) |
| Enteric infections                            | F | 455,426,592      | 142,123.6(-0.6%)              | 276,626,272      | 87,331.4(-0.4%)               | 259,943,280      | 83,622.7(-0.1%)               | 201,975,104      | 66,932.6(0.1%)                | 177,922,848      | 60,154.5(0.1%)                | 1,371,894,096    | 88,762.1(-0.4%)               |
|                                               | M | 493,401,504      | 144,101.4(-0.5%)              | 298,930,560      | 88,454.3(-0.1%)               | 276,538,976      | 83,462.3(0.2%)                | 209,889,696      | 66,048.3(0.3%)                | 179,281,408      | 58,902.8(0.3%)                | 1,458,042,144    | 89,240.6(-0.2%)               |
| HIV/AIDS                                      | F | 62,103           | 19.4(-1.1%)                   | 153              | 0.0(%)                        | 91               | 0.0(%)                        | 138,468          | 45.9(-1.4%)                   | 139,517          | 47.2(-1.4%)                   | 340,332          | 22.0(-1.3%)                   |
|                                               | M | 64,848           | 18.9(-1.1%)                   | 153              | 0.0(%)                        | 91               | 0.0(%)                        | 45,518           | 14.3(-0.3%)                   | 98,936           | 32.5(-0.5%)                   | 209,547          | 12.8(-0.7%)                   |
| Hepatitis                                     | F | 41,206,780       | 12,859.3(-0.5%)               | 16,015,513       | 5,056.1(-0.3%)                | 9,964,003        | 3,205.4(-0.5%)                | 7,733,428        | 2,562.8(-0.7%)                | 7,739,657        | 2,616.7(-0.5%)                | 82,659,384       | 5,348.1(-0.6%)                |
|                                               | M | 43,633,160       | 12,743.4(-0.5%)               | 17,428,534       | 5,157.1(-0.4%)                | 11,259,141       | 3,398.1(-0.6%)                | 9,158,676        | 2,882.1(-0.8%)                | 9,752,641        | 3,204.2(-0.6%)                | 91,232,144       | 5,583.9(-0.7%)                |
| Infectious skin conditions                    | F | 163,923,888      | 51,155.2(0.2%)                | 144,684,704      | 45,677.2(0.3%)                | 122,477,880      | 39,400.6(0.3%)                | 113,848,960      | 37,728.5(0.2%)                | 107,831,088      | 36,457.0(0.1%)                | 652,766,528      | 42,234.2(0.2%)                |
|                                               | M | 174,435,920      | 50,945.3(0.1%)                | 160,113,232      | 47,377.9(0.3%)                | 136,359,984      | 41,154.8(0.3%)                | 130,386,208      | 41,030.1(0.2%)                | 128,226,928      | 42,128.9(0.1%)                | 729,522,304      | 44,651.0(0.2%)                |
| Lower respiratory infections                  | F | 21,537,478       | 6,721.1(-1.7%)                | 14,703,271       | 4,641.9(-1.4%)                | 11,878,374       | 3,821.2(-0.9%)                | 11,136,138       | 3,690.4(-0.6%)                | 10,728,515       | 3,627.2(-0.4%)                | 69,983,776       | 4,528.0(-1.3%)                |
|                                               | M | 23,546,122       | 6,876.8(-1.7%)                | 17,851,324       | 5,282.3(-1.3%)                | 15,150,964       | 4,572.7(-0.6%)                | 12,371,353       | 3,893.0(-0.4%)                | 10,883,982       | 3,575.9(-0.3%)                | 79,803,745       | 4,884.5(-1.2%)                |
| Malaria                                       | F | 42,056,712       | 13,124.5(-0.5%)               | 18,274,742       | 5,769.4(-0.5%)                | 14,881,713       | 4,787.4(-0.5%)                | 10,948,187       | 3,628.1(-0.1%)                | 8,308,950        | 2,809.2(-0.4%)                | 94,470,304       | 6,112.3(-0.5%)                |
|                                               | M | 43,130,064       | 12,596.4(-0.5%)               | 18,671,368       | 5,524.9(-0.5%)                | 14,996,943       | 4,526.2(-0.5%)                | 10,747,997       | 3,382.2(-0.2%)                | 7,830,697        | 2,572.8(-0.5%)                | 95,377,069       | 5,837.6(-0.6%)                |
| Maternal sepsis & other maternal infections   | F | 0                | 0.0(%)                        | 0                | 0.0(%)                        | 62,939           | 20.2(-0.3%)                   | 2,887,793        | 957.0(-1.3%)                  | 7,004,614        | 2,368.2(-1.3%)                | 9,955,345        | 644.1(-1.2%)                  |
|                                               | M | 0                | 0.0(%)                        | 0                | 0.0(%)                        | 0                | 0.0(%)                        | 0                | 0.0(%)                        | 0                | 0.0(%)                        | 0                | 0.0(%)                        |
| Meningitis & Encephalitis                     | F | 741,672          | 231.5(-1.2%)                  | 194,108          | 61.3(-1.1%)                   | 110,715          | 35.6(-0.9%)                   | 85,973           | 28.5(-0.7%)                   | 80,634           | 27.3(-0.6%)                   | 1,213,102        | 78.5(-1.2%)                   |
|                                               | M | 870,481          | 254.2(-1.3%)                  | 224,714          | 66.5(-1.1%)                   | 125,108          | 37.8(-1.0%)                   | 92,865           | 29.2(-0.8%)                   | 78,540           | 25.8(-0.7%)                   | 1,391,708        | 85.2(-1.3%)                   |
| Neglected Tropical diseases                   | F | 1,621,116        | 505.9(0.0%)                   | 2,960,812        | 934.7(0.2%)                   | 3,281,057        | 1,055.5(0.6%)                 | 3,139,488        | 1,040.4(1.1%)                 | 2,930,649        | 990.8(1.2%)                   | 13,933,122       | 901.5(0.7%)                   |
|                                               | M | 1,573,428        | 459.5(-0.0%)                  | 2,916,252        | 862.9(0.2%)                   | 3,270,123        | 987.0(0.6%)                   | 3,102,372        | 976.3(1.2%)                   | 2,850,484        | 936.5(1.4%)                   | 13,712,658       | 839.3(0.7%)                   |
| Neonatal sepsis & other neonatal infections   | F | 2,970,032        | 926.8(0.4%)                   | 0                | 0.0(%)                        | 0                | 0.0(%)                        | 0                | 0.0(%)                        | 0                | 0.0(%)                        | 2,970,032        | 192.2(0.1%)                   |
|                                               | M | 3,340,036        | 975.5(0.1%)                   | 0                | 0.0(%)                        | 0                | 0.0(%)                        | 0                | 0.0(%)                        | 0                | 0.0(%)                        | 3,340,036        | 204.4(-0.2%)                  |
| Other unspecified infectious diseases         | F | 0                | 0.0(%)                        | 0                | 0.0(%)                        | 0                | 0.0(%)                        | 0                | 0.0(%)                        | 0                | 0.0(%)                        | 0                | 0.0(%)                        |
|                                               | M | 0                | 0.0(%)                        | 0                | 0.0(%)                        | 0                | 0.0(%)                        | 0                | 0.0(%)                        | 0                | 0.0(%)                        | 0                | 0.0(%)                        |
| Rheumatic heart disease                       | F | 73,506           | 22.9(0.6%)                    | 194,234          | 61.3(0.7%)                    | 266,788          | 85.8(0.9%)                    | 263,582          | 87.3(0.9%)                    | 207,227          | 70.1(0.8%)                    | 1,005,337        | 65.0(0.9%)                    |
|                                               | M | 72,896           | 21.3(0.6%)                    | 188,715          | 55.8(0.8%)                    | 241,868          | 73.0(0.9%)                    | 219,612          | 69.1(0.9%)                    | 164,952          | 54.2(0.8%)                    | 888,044          | 54.4(0.9%)                    |
| Sexually transmitted infections excluding HIV | F | 0                | 0.0(%)                        | 590              | 0.2(0.1%)                     | 4,435,033        | 1,426.7(0.3%)                 | 21,251,650       | 7,042.6(0.0%)                 | 42,428,392       | 14,344.8(0.0%)                | 68,115,665       | 4,407.1(0.2%)                 |
|                                               | M | 0                | 0.0(%)                        | 617              | 0.2(0.1%)                     | 3,370,051        | 1,017.1(0.1%)                 | 18,573,102       | 5,844.6(0.0%)                 | 41,925,056       | 13,774.5(-0.0%)               | 63,868,826       | 3,909.1(0.2%)                 |
| Tuberculosis                                  | F | 168,994          | 52.7(-1.8%)                   | 115,054          | 36.3(-1.9%)                   | 168,785          | 54.3(-1.6%)                   | 376,732          | 124.8(-1.1%)                  | 421,044          | 142.4(-1.1%)                  | 1,250,609        | 80.9(-1.4%)                   |
|                                               | M | 128,165          | 37.4(-1.7%)                   | 84,874           | 25.1(-1.7%)                   | 123,393          | 37.2(-1.3%)                   | 327,616          | 103.1(-0.8%)                  | 398,926          | 131.1(-0.7%)                  | 1,062,974        | 65.1(-1.1%)                   |
| Upper respiratory infections                  | F | 1,042,244,288    | 325,250.1(-0.0%)              | 875,405,312      | 276,367.1(0.0%)               | 762,121,408      | 245,171.4(-0.0%)              | 728,742,848      | 241,498.4(-0.0%)              | 697,653,568      | 235,872.1(-0.0%)              | 4,106,167,296    | 265,670.6(-0.0%)              |
|                                               | M | 1,139,803,648    | 332,887.8(-0.1%)              | 950,007,616      | 281,109.6(-0.0%)              | 835,272,704      | 252,093.7(-0.0%)              | 788,471,424      | 248,117.0(-0.0%)              | 731,861,632      | 240,452.7(-0.0%)              | 4,445,416,960    | 272,085.3(-0.1%)              |
| Vaccine Preventable disease                   | F | 40,758,324       | 12,719.3(-1.6%)               | 4,228,408        | 1,334.9(-1.6%)                | 1,403,844        | 451.6(-1.4%)                  | 833,509          | 276.2(-0.9%)                  | 732,109          | 247.5(-0.7%)                  | 47,956,196       | 3,102.8(-1.7%)                |
|                                               | M | 40,910,408       | 11,948.2(-1.6%)               | 4,410,571        | 1,305.1(-1.5%)                | 1,512,721        | 456.6(-1.3%)                  | 887,154          | 279.2(-0.8%)                  | 743,705          | 244.3(-0.5%)                  | 48,464,560       | 2,966.3(-1.7%)                |
| Total communicable                            | F | 1,812,717,978    | 565,689.6(-0.3%)              | 1,353,208,939    | 427,210.7(-0.1%)              | 1,190,729,122    | 383,052.8(-0.0%)              | 1,103,098,278    | 365,556.2(-0.0%)              | 1,063,921,584    | 359,704.9(-0.0%)              | 6,523,675,787    | 422,084.3(-0.2%)              |
|                                               | M | 1,964,837,784    | 573,844.9(-0.3%)              | 1,470,639,814    | 435,165.9(-0.1%)              | 1,297,980,200    | 391,743.5(0.0%)               | 1,184,053,981    | 372,599.3(0.0%)               | 1,113,932,934    | 365,982.0(0.0%)               | 7,031,444,674    | 430,365.1(-0.1%)              |



**56a. Number of YLDs in 2019, YLD /100,000 in 2019 and change in YLDs/100,000 from 1990-2019, in 0-24 year olds by SDI groups**

| SDI group                                     |        | Low            |                          | Low-Mid        |                          | Middle         |                          | High-mid       |                          | High           |                          |
|-----------------------------------------------|--------|----------------|--------------------------|----------------|--------------------------|----------------|--------------------------|----------------|--------------------------|----------------|--------------------------|
| Population in 2019                            | Female | 345,856,384.00 |                          | 418,727,616    |                          | 442,771,136    |                          | 200,230,976    |                          | 137,035,328    |                          |
|                                               | Male   | 354,697,440.00 |                          | 438,510,272    |                          | 476,123,648    |                          | 217,982,720    |                          | 145,509,888    |                          |
|                                               |        | Number of YLDs | YLDs/100,000 (change/pa) | Number of YLDs | YLDs/100,000 (change/pa) | Number of YLDs | YLDs/100,000 (change/pa) | Number of YLDs | YLDs/100,000 (change/pa) | Number of YLDs | YLDs/100,000 (change/pa) |
| Enteric infections                            | Female | 733,741        | 212.2(-0.8%)             | 761,922        | 182.0(-1.1%)             | 573,629        | 129.6(-0.3%)             | 249,327        | 124.5(-0.1%)             | 106,308        | 77.6(0.3%)               |
|                                               | Male   | 766,985        | 216.2(-0.7%)             | 798,293        | 182.0(-1.0%)             | 633,269        | 133.0(-0.3%)             | 277,043        | 127.1(-0.1%)             | 122,529        | 84.2(0.1%)               |
| HIV/AIDS                                      | Female | 151,021        | 43.7(-1.1%)              | 95,800         | 22.9(2.1%)               | 87,149         | 19.7(19.7%)              | 9,066          | 4.5(7.6%)                | 2,138          | 1.6(-0.8%)               |
|                                               | Male   | 90,611         | 25.5(1.3%)               | 59,330         | 13.5(7.2%)               | 57,941         | 12.2(21.7%)              | 8,741          | 4.0(2.9%)                | 2,669          | 1.8(-2.0%)               |
| Hepatitis                                     | Female | 21,731         | 6.3(0.1%)                | 25,924         | 6.2(0.2%)                | 27,596         | 6.2(-0.4%)               | 11,499         | 5.7(-0.5%)               | 4,790          | 3.5(-0.3%)               |
|                                               | Male   | 24,612         | 6.9(0.1%)                | 29,879         | 6.8(0.2%)                | 31,859         | 6.7(-0.5%)               | 13,322         | 6.1(-0.6%)               | 5,373          | 3.7(-0.4%)               |
| Infectious skin conditions                    | Female | 790,916        | 228.7(-0.1%)             | 867,659        | 207.2(-0.2%)             | 979,417        | 221.2(-0.2%)             | 409,853        | 204.7(-0.0%)             | 294,179        | 214.7(-0.0%)             |
|                                               | Male   | 902,252        | 254.4(-0.1%)             | 970,669        | 221.4(-0.1%)             | 1,123,072      | 235.9(-0.2%)             | 446,995        | 205.1(-0.1%)             | 233,015        | 160.1(-0.0%)             |
| Lower respiratory infections                  | Female | 30,492         | 8.8(-1.5%)               | 29,534         | 7.1(-1.6%)               | 27,573         | 6.2(-1.5%)               | 9,749          | 4.9(-1.4%)               | 5,348          | 3.9(-0.4%)               |
|                                               | Male   | 32,972         | 9.3(-1.5%)               | 35,967         | 8.2(-1.5%)               | 32,826         | 6.9(-1.4%)               | 11,283         | 5.2(-1.4%)               | 5,908          | 4.1(-0.5%)               |
| Malaria                                       | Female | 783,064        | 226.4(-1.1%)             | 245,897        | 58.7(-1.0%)              | 92,041         | 20.8(-0.8%)              | 5,071          | 2.5(-1.5%)               | 40             | 0.0(-3.0%)               |
|                                               | Male   | 619,310        | 174.6(-1.2%)             | 191,556        | 43.7(-1.1%)              | 74,545         | 15.7(-0.9%)              | 4,231          | 1.9(-1.4%)               | 33             | 0.0(-3.0%)               |
| Maternal sepsis and other maternal infections | Female | 12,865         | 3.7(-0.9%)               | 12,523         | 3.0(-1.2%)               | 9,789          | 2.2(-1.4%)               | 3,500          | 1.7(-1.7%)               | 1,724          | 1.3(-1.8%)               |
|                                               | Male   | 0              | 0.0(%)                   | 0              | 0.0(%)                   | 0              | 0.0(%)                   | 0              | 0.0(%)                   | 0              | 0.0(%)                   |
| Meningitis & Encephalitis                     | Female | 101,252        | 29.3(-1.2%)              | 85,436         | 20.4(-1.4%)              | 52,491         | 11.9(-1.5%)              | 14,700         | 7.3(-1.7%)               | 3,997          | 2.9(-1.9%)               |
|                                               | Male   | 106,403        | 30.0(-1.3%)              | 89,179         | 20.3(-1.5%)              | 57,056         | 12.0(-1.6%)              | 17,072         | 7.8(-1.7%)               | 4,726          | 3.2(-1.8%)               |
| Neglected Tropical diseases                   | Female | 1,106,230      | 319.9(-1.7%)             | 698,370        | 166.8(-1.9%)             | 416,132        | 94.0(-1.8%)              | 93,660         | 46.8(-1.7%)              | 14,102         | 10.3(-1.6%)              |
|                                               | Male   | 1,134,452      | 319.8(-2.0%)             | 762,268        | 173.8(-2.0%)             | 466,162        | 97.9(-2.0%)              | 99,149         | 45.5(-1.7%)              | 12,248         | 8.4(-1.4%)               |
| Neonatal sepsis and other neonatal infections | Female | 160,363        | 46.4(19.3%)              | 290,624        | 69.4(16.6%)              | 381,708        | 86.2(7.7%)               | 153,720        | 76.8(4.8%)               | 12,952         | 9.5(0.6%)                |
|                                               | Male   | 149,542        | 42.2(19.0%)              | 315,649        | 72.0(19.9%)              | 417,977        | 87.8(8.6%)               | 160,843        | 73.8(5.4%)               | 15,569         | 10.7(0.5%)               |
| Other unspecified infectious diseases         | Female | 213,218        | 61.6(-0.3%)              | 197,944        | 47.3(-0.6%)              | 108,391        | 24.5(-0.8%)              | 31,608         | 15.8(-1.0%)              | 11,161         | 8.1(-0.9%)               |
|                                               | Male   | 214,500        | 60.5(-0.3%)              | 171,971        | 39.2(-0.8%)              | 92,905         | 19.5(-0.9%)              | 27,336         | 12.5(-1.1%)              | 9,004          | 6.2(-0.6%)               |
| Rheumatic heart disease                       | Female | 120,077        | 34.7(0.6%)               | 120,460        | 28.8(0.8%)               | 90,354         | 20.4(0.1%)               | 20,040         | 10.0(0.2%)               | 805            | 0.6(0.1%)                |
|                                               | Male   | 110,584        | 31.2(0.7%)               | 100,615        | 22.9(0.8%)               | 83,241         | 17.5(-0.0%)              | 18,086         | 8.3(0.1%)                | 770            | 0.5(0.1%)                |
| Sexually transmitted infections excluding HIV | Female | 24,232         | 7.0(-0.0%)               | 20,076         | 4.8(0.5%)                | 18,199         | 4.1(0.2%)                | 6,893          | 3.4(-0.0%)               | 5,766          | 4.2(-0.3%)               |
|                                               | Male   | 11,994         | 3.4(0.2%)                | 16,576         | 3.8(0.4%)                | 20,191         | 4.2(0.1%)                | 7,343          | 3.4(0.2%)                | 2,059          | 1.4(-0.0%)               |
| Tuberculosis                                  | Female | 254,740        | 73.7(-1.6%)              | 264,284        | 63.1(-1.7%)              | 161,009        | 36.4(-1.4%)              | 25,679         | 12.8(-1.6%)              | 2,809          | 2.0(-2.1%)               |
|                                               | Male   | 187,002        | 52.7(-1.3%)              | 160,532        | 36.6(-1.4%)              | 117,671        | 24.7(-1.4%)              | 24,473         | 11.2(-1.5%)              | 2,287          | 1.6(-1.9%)               |
| Upper respiratory infections                  | Female | 436,668        | 126.3(-0.2%)             | 554,972        | 132.5(-0.2%)             | 559,417        | 126.3(-0.2%)             | 243,565        | 121.6(-0.1%)             | 195,759        | 142.9(-0.0%)             |
|                                               | Male   | 493,620        | 139.2(-0.1%)             | 637,148        | 145.3(-0.2%)             | 659,099        | 138.4(-0.2%)             | 283,653        | 130.1(-0.1%)             | 207,958        | 142.9(-0.0%)             |
| Vaccine Preventable disease                   | Female | 39,506         | 11.4(-2.2%)              | 28,681         | 6.8(-2.4%)               | 24,751         | 5.6(-2.1%)               | 7,681          | 3.8(-2.0%)               | 4,575          | 3.3(-1.0%)               |
|                                               | Male   | 34,534         | 9.7(-2.2%)               | 25,775         | 5.9(-2.5%)               | 22,575         | 4.7(-2.2%)               | 7,213          | 3.3(-2.0%)               | 4,147          | 2.8(-1.1%)               |
| Total communicable                            | Female | 4,980,117      | 1,439.9(-1.0%)           | 4,300,105      | 1,026.9(-0.9%)           | 3,609,646      | 815.2(-0.5%)             | 1,295,611      | 647.1(-0.2%)             | 666,450        | 486.3(-0.1%)             |
|                                               | Male   | 4,879,374      | 1,375.6(-1.1%)           | 4,365,407      | 995.5(-0.9%)             | 3,890,389      | 817.1(-0.6%)             | 1,406,782      | 645.4(-0.2%)             | 628,296        | 431.8(-0.1%)             |

**S6b. Number of YLDs in 2019, YLDs/100,000 in 2019 and change in YLDs/100,000 from 1990-2019, for under 5, 5-9, 10-14, 15-19, 20-24, 0-24 year olds**

| Age group                                     |        | Under 5        |                          | 5-9            |                          | 10-14          |                          | 15-19          |                          | 20-24          |                          | 0-24           |                          |
|-----------------------------------------------|--------|----------------|--------------------------|----------------|--------------------------|----------------|--------------------------|----------------|--------------------------|----------------|--------------------------|----------------|--------------------------|
| Population in 2019                            | Female | 320,443,936    |                          | 316,754,496    |                          | 310,852,512    |                          | 301,758,880    |                          | 295,776,256    |                          | 1,545,586,048  |                          |
|                                               | Male   | 342,398,752    |                          | 337,949,216    |                          | 331,334,176    |                          | 317,782,112    |                          | 304,368,224    |                          | 1,633,832,448  |                          |
|                                               |        | Number of YLDs | YLDs/100,000 (change/pa) | Number of YLDs | YLDs/100,000 (change/pa) | Number of YLDs | YLDs/100,000 (change/pa) | Number of YLDs | YLDs/100,000 (change/pa) | Number of YLDs | YLDs/100,000 (change/pa) | Number of YLDs | YLDs/100,000 (change/pa) |
| Enteric infection                             | Female | 855,993        | 267.1(-0.6%)             | 481,395        | 152.0(-0.5%)             | 453,017        | 145.7(-0.2%)             | 345,128        | 114.4(-0.0%)             | 290,993        | 98.4(-0.0%)              | 2,426,525      | 157.0(-0.4%)             |
|                                               | Male   | 926,662        | 270.6(-0.6%)             | 523,366        | 154.9(-0.3%)             | 487,418        | 147.1(0.0%)              | 364,765        | 114.8(0.1%)              | 297,746        | 97.8(0.1%)               | 2,599,957      | 159.1(-0.4%)             |
| HIV/AIDS                                      | Female | 26,144         | 8.2(1.5%)                | 34,126         | 10.8(33.7%)              | 39,615         | 12.7(742.9%)             | 80,274         | 26.6(0.6%)               | 165,290        | 55.9(1.4%)               | 345,448        | 22.4(2.4%)               |
|                                               | Male   | 27,652         | 8.1(1.6%)                | 35,765         | 10.6(33.9%)              | 40,281         | 12.2(703.7%)             | 41,890         | 13.2(7.3%)               | 73,882         | 24.3(2.4%)               | 219,471        | 13.4(6.1%)               |
| Hepatitis                                     | Female | 8,343          | 2.6(-0.9%)               | 22,223         | 7.0(-0.1%)               | 22,711         | 7.3(-0.1%)               | 19,377         | 6.4(-0.2%)               | 18,944         | 6.4(-0.1%)               | 91,598         | 5.9(-0.2%)               |
|                                               | Male   | 9,106          | 2.7(-1.0%)               | 24,126         | 7.1(-0.2%)               | 25,720         | 7.8(-0.1%)               | 22,501         | 7.1(-0.3%)               | 23,657         | 7.8(-0.2%)               | 105,110        | 6.4(-0.3%)               |
| Infectious skin conditions                    | Female | 690,380        | 215.4(-0.0%)             | 927,862        | 292.9(-0.0%)             | 690,126        | 222.0(-0.0%)             | 553,956        | 183.6(-0.2%)             | 482,023        | 163.0(-0.3%)             | 3,344,347      | 216.4(-0.1%)             |
|                                               | Male   | 756,778        | 221.0(-0.0%)             | 1,021,184      | 302.2(0.0%)              | 778,552        | 235.0(0.0%)              | 610,340        | 192.1(-0.1%)             | 511,635        | 168.1(-0.2%)             | 3,678,489      | 225.1(-0.1%)             |
| Lower respirator infections                   | Female | 35,169         | 11.0(-1.7%)              | 20,920         | 6.6(-1.5%)               | 16,534         | 5.3(-0.9%)               | 15,409         | 5.1(-0.6%)               | 14,729         | 5.0(-0.4%)               | 102,760        | 6.6(-1.4%)               |
|                                               | Male   | 39,720         | 11.6(-1.7%)              | 25,056         | 7.4(-1.4%)               | 21,440         | 6.5(-0.6%)               | 17,628         | 5.5(-0.3%)               | 15,183         | 5.0(-0.2%)               | 119,028        | 7.3(-1.3%)               |
| Malaria                                       | Female | 289,030        | 90.2(-0.3%)              | 277,801        | 87.7(0.0%)               | 178,089        | 57.3(0.1%)               | 241,923        | 80.2(0.9%)               | 139,657        | 47.2(0.2%)               | 1,126,500      | 72.9(0.0%)               |
|                                               | Male   | 313,894        | 91.7(-0.3%)              | 286,229        | 84.7(0.1%)               | 168,254        | 50.8(0.1%)               | 75,396         | 23.7(0.3%)               | 46,193         | 15.2(0.0%)               | 889,966        | 54.5(-0.2%)              |
| Maternal sepsis other maternal infections     | Female | 0              | 0.0(.%)                  | 0              | 0.0(.%)                  | 263            | 0.1(-0.3%)               | 11,682         | 3.9(-1.3%)               | 28,483         | 9.6(-1.3%)               | 40,429         | 2.6(-1.2%)               |
|                                               | Male   | 0              | 0.0(.%)                  | 0              | 0.0(.%)                  | 0              | 0.0(.%)                  | 0              | 0.0(.%)                  | 0              | 0.0(.%)                  | 0              | 0.0(.%)                  |
| Meningitis & Encephalitis                     | Female | 38,370         | 12.0(-1.3%)              | 54,989         | 17.4(-1.2%)              | 57,274         | 18.4(-1.1%)              | 55,525         | 18.4(-1.0%)              | 51,841         | 17.5(-1.1%)              | 257,998        | 16.7(-1.1%)              |
|                                               | Male   | 43,661         | 12.8(-1.4%)              | 59,975         | 17.7(-1.3%)              | 60,980         | 18.4(-1.2%)              | 57,687         | 18.2(-1.2%)              | 52,264         | 17.2(-1.2%)              | 274,568        | 16.8(-1.3%)              |
| Neglected Tropical disease                    | Female | 338,853        | 105.7(-1.2%)             | 568,979        | 179.6(-1.3%)             | 487,468        | 156.8(-1.3%)             | 462,616        | 153.3(-1.6%)             | 472,117        | 159.6(-1.7%)             | 2,330,032      | 150.8(-1.4%)             |
|                                               | Male   | 372,745        | 108.9(-1.2%)             | 671,039        | 198.6(-1.6%)             | 543,731        | 164.1(-1.8%)             | 443,638        | 139.6(-1.9%)             | 445,036        | 146.2(-1.9%)             | 2,476,188      | 151.6(-1.7%)             |
| Neonatal sepsis other neonatal infections     | Female | 218,874        | 68.3(4.4%)               | 205,259        | 64.8(9.2%)               | 199,165        | 64.1(9.8%)               | 191,183        | 63.4(10.1%)              | 185,663        | 62.8(10.4%)              | 1,000,143      | 64.7(7.9%)               |
|                                               | Male   | 236,562        | 69.1(4.3%)               | 221,648        | 65.6(10.6%)              | 214,178        | 64.6(11.6%)              | 200,499        | 63.1(12.1%)              | 187,472        | 61.6(12.5%)              | 1,060,359      | 64.9(8.8%)               |
| Other unspecified infectious diseases         | Female | 159,555        | 49.8(-0.5%)              | 172,117        | 54.3(-0.0%)              | 114,346        | 36.8(0.0%)               | 70,887         | 23.5(0.6%)               | 45,714         | 15.5(-0.1%)              | 562,619        | 36.4(-0.2%)              |
|                                               | Male   | 177,471        | 51.8(-0.4%)              | 185,542        | 54.9(0.1%)               | 89,575         | 27.0(0.0%)               | 36,781         | 11.6(-0.1%)              | 26,630         | 8.7(-0.5%)               | 515,999        | 31.6(-0.3%)              |
| Rheumatic heart disease                       | Female | 5,958          | 1.9(0.5%)                | 34,512         | 10.9(0.6%)               | 74,094         | 23.8(0.8%)               | 110,027        | 36.5(0.8%)               | 127,396        | 43.1(0.8%)               | 351,987        | 22.8(0.9%)               |
|                                               | Male   | 5,906          | 1.7(0.6%)                | 33,778         | 10.0(0.7%)               | 70,212         | 21.2(0.7%)               | 97,989         | 30.8(0.7%)               | 105,633        | 34.7(0.7%)               | 313,517        | 19.2(0.9%)               |
| Sexually transmitted infections excluding HIV | Female | 0              | 0.0(.%)                  | 0              | 0.0(0.1%)                | 3,015          | 1.0(0.1%)                | 18,838         | 6.2(0.2%)                | 53,368         | 18.0(0.2%)               | 75,221         | 4.9(0.4%)                |
|                                               | Male   | 0              | 0.0(.%)                  | 0              | 0.0(0.1%)                | 4,308          | 1.3(-0.5%)               | 19,996         | 6.3(0.1%)                | 33,903         | 11.1(0.1%)               | 58,207         | 3.6(0.2%)                |
| Tuberculosis                                  | Female | 104,816        | 32.7(-1.6%)              | 120,677        | 38.1(-1.7%)              | 83,177         | 26.8(-1.4%)              | 131,732        | 43.7(-1.0%)              | 268,435        | 90.8(-1.0%)              | 708,837        | 45.9(-1.3%)              |
|                                               | Male   | 76,317         | 22.3(-1.5%)              | 72,316         | 21.4(-1.8%)              | 33,545         | 10.1(-1.8%)              | 91,222         | 28.7(0.0%)               | 218,795        | 71.9(-0.7%)              | 492,195        | 30.1(-1.1%)              |
| Upper respiratory infections                  | Female | 484,942        | 151.3(-0.1%)             | 460,866        | 145.5(-0.1%)             | 371,067        | 119.4(-0.1%)             | 347,755        | 115.2(-0.1%)             | 327,033        | 110.6(-0.2%)             | 1,991,663      | 128.9(-0.1%)             |
|                                               | Male   | 540,791        | 157.9(-0.1%)             | 526,776        | 155.9(-0.1%)             | 432,395        | 130.5(-0.1%)             | 405,303        | 127.5(-0.1%)             | 377,644        | 124.1(-0.2%)             | 2,282,909      | 139.7(-0.1%)             |
| Vaccine Preventable disease                   | Female | 83,843         | 26.2(-2.0%)              | 7,516          | 2.4(-2.0%)               | 4,217          | 1.4(-1.4%)               | 4,431          | 1.5(-0.7%)               | 5,267          | 1.8(-0.4%)               | 105,275        | 6.8(-2.0%)               |
|                                               | Male   | 73,645         | 21.5(-2.1%)              | 6,688          | 2.0(-2.1%)               | 4,205          | 1.3(-1.4%)               | 4,527          | 1.4(-0.6%)               | 5,250          | 1.7(-0.3%)               | 94,315         | 5.8(-2.1%)               |
| Total communicable                            | Female | 3,340,269      | 1,042.4(-0.5%)           | 3,389,243      | 1,070.0(-0.4%)           | 2,794,176      | 898.9(-0.3%)             | 2,660,741      | 881.7(-0.4%)             | 2,676,953      | 905.1(-0.5%)             | 14,861,382     | 961.5(-0.4%)             |
|                                               | Male   | 3,600,909      | 1,051.7(-0.5%)           | 3,693,489      | 1,092.9(-0.5%)           | 2,974,792      | 897.8(-0.5%)             | 2,490,160      | 783.6(-0.5%)             | 2,420,924      | 795.4(-0.6%)             | 15,180,275     | 929.1(-0.5%)             |

S7a. Number of deaths in 2019, deaths/100,000 in 2019 and change in deaths/100,000 from 1990-2019, in 0-24 year olds by SDI groups

| SDI group                                     |        | Low              | Low-Mid                    | Middle           | High-mid                   | High             |                            |                  |                            |                  |                            |
|-----------------------------------------------|--------|------------------|----------------------------|------------------|----------------------------|------------------|----------------------------|------------------|----------------------------|------------------|----------------------------|
| Population in 2019                            | Female | 345,856,384.00   | 418,727,616                | 442,771,136      | 200,230,976                | 137,035,328      |                            |                  |                            |                  |                            |
|                                               | Male   | 354,697,440.00   | 438,510,272                | 476,123,648      | 217,982,720                | 145,509,888      |                            |                  |                            |                  |                            |
|                                               |        | Number of deaths | Deaths/100,000 (change/pa) | Number of deaths | Deaths/100,000 (change/pa) | Number of deaths | Deaths/100,000 (change/pa) | Number of deaths | Deaths/100,000 (change/pa) | Number of deaths | Deaths/100,000 (change/pa) |
| Enteric infections                            | Female | 214,947          | 62.1(-2.4%)                | 105,530          | 25.2(-2.7%)                | 30,876           | 7.0(-2.7%)                 | 3,296            | 1.6(-2.8%)                 | 192              | 0.1(-2.8%)                 |
|                                               | Male   | 258,573          | 72.9(-2.3%)                | 110,656          | 25.2(-2.7%)                | 34,921           | 7.3(-2.7%)                 | 3,943            | 1.8(-2.8%)                 | 224              | 0.2(-2.8%)                 |
| HIV/AIDS                                      | Female | 35,107           | 10.2(-2.0%)                | 22,305           | 5.3(0.6%)                  | 15,839           | 3.6(15.6%)                 | 1,456            | 0.7(3.0%)                  | 143              | 0.1(-2.3%)                 |
|                                               | Male   | 30,072           | 8.5(-1.7%)                 | 18,479           | 4.2(1.4%)                  | 13,646           | 2.9(12.9%)                 | 1,598            | 0.7(0.5%)                  | 184              | 0.1(-2.7%)                 |
| Hepatitis                                     | Female | 4,783            | 1.4(-2.3%)                 | 7,324            | 1.7(-2.4%)                 | 2,302            | 0.5(-2.7%)                 | 375              | 0.2(-2.6%)                 | 49               | 0.0(-2.3%)                 |
|                                               | Male   | 6,780            | 1.9(-2.2%)                 | 9,223            | 2.1(-2.2%)                 | 4,071            | 0.9(-2.3%)                 | 899              | 0.4(-2.2%)                 | 99               | 0.1(-2.1%)                 |
| Infectious skin conditions                    | Female | 1,239            | 0.4(-1.5%)                 | 1,354            | 0.3(-1.8%)                 | 553              | 0.1(-1.6%)                 | 107              | 0.1(-1.9%)                 | 23               | 0.0(0.9%)                  |
|                                               | Male   | 862              | 0.2(-1.3%)                 | 939              | 0.2(-1.8%)                 | 465              | 0.1(-1.9%)                 | 124              | 0.1(-1.9%)                 | 27               | 0.0(0.4%)                  |
| Lower respiratory infections                  | Female | 195,468          | 56.5(-2.3%)                | 114,118          | 27.3(-2.6%)                | 46,247           | 10.4(-2.8%)                | 6,939            | 3.5(-2.9%)                 | 940              | 0.7(-2.3%)                 |
|                                               | Male   | 204,774          | 57.7(-2.4%)                | 110,476          | 25.2(-2.7%)                | 54,146           | 11.4(-2.8%)                | 8,722            | 4.0(-2.9%)                 | 1,135            | 0.8(-2.4%)                 |
| Malaria                                       | Female | 148,480          | 42.9(-2.1%)                | 44,198           | 10.6(-2.1%)                | 16,917           | 3.8(-2.0%)                 | 1,666            | 0.8(-2.1%)                 | 0                | 0.0(-3.3%)                 |
|                                               | Male   | 150,572          | 42.5(-2.1%)                | 45,458           | 10.4(-2.0%)                | 18,221           | 3.8(-1.9%)                 | 1,850            | 0.8(-1.9%)                 | 0                | 0.0(-3.3%)                 |
| Maternal sepsis and other maternal infections | Female | 3,500            | 1.0(-2.1%)                 | 1,002            | 0.2(-2.9%)                 | 261              | 0.1(-3.0%)                 | 43               | 0.0(-3.0%)                 | 4                | 0.0(-2.7%)                 |
|                                               | Male   |                  | (.%)                       |                  | (.%)                       |                  | (.%)                       |                  | (.%)                       |                  | (.%)                       |
| Meningitis & Encephalitis                     | Female | 47,111           | 13.6(-2.3%)                | 23,516           | 5.6(-2.6%)                 | 9,898            | 2.2(-2.5%)                 | 1,996            | 1.0(-2.6%)                 | 383              | 0.3(-2.3%)                 |
|                                               | Male   | 58,549           | 16.5(-2.1%)                | 26,952           | 6.1(-2.4%)                 | 12,758           | 2.7(-2.5%)                 | 2,606            | 1.2(-2.6%)                 | 448              | 0.3(-2.4%)                 |
| Neglected Tropical diseases                   | Female | 7,005            | 2.0(-2.8%)                 | 4,261            | 1.0(-2.5%)                 | 4,098            | 0.9(-2.0%)                 | 446              | 0.2(-1.8%)                 | 15               | 0.0(-1.9%)                 |
|                                               | Male   | 12,221           | 3.4(-2.8%)                 | 6,743            | 1.5(-2.4%)                 | 5,055            | 1.1(-1.6%)                 | 730              | 0.3(-1.6%)                 | 18               | 0.0(-2.3%)                 |
| Neonatal sepsis and other neonatal infections | Female | 49,429           | 14.3(-1.2%)                | 31,526           | 7.5(-1.5%)                 | 15,374           | 3.5(-1.0%)                 | 3,195            | 1.6(-1.2%)                 | 717              | 0.5(-1.8%)                 |
|                                               | Male   | 62,342           | 17.6(-1.2%)                | 38,530           | 8.8(-1.5%)                 | 20,443           | 4.3(-1.2%)                 | 3,900            | 1.8(-1.3%)                 | 911              | 0.6(-1.8%)                 |
| Other unspecified infectious diseases         | Female | 5,315            | 1.5(-1.6%)                 | 3,110            | 0.7(-1.8%)                 | 1,391            | 0.3(-1.7%)                 | 475              | 0.2(-1.6%)                 | 263              | 0.2(-0.6%)                 |
|                                               | Male   | 6,360            | 1.8(-1.6%)                 | 5,242            | 1.2(-1.6%)                 | 2,026            | 0.4(-1.9%)                 | 687              | 0.3(-1.7%)                 | 319              | 0.2(-0.8%)                 |
| Rheumatic heart disease                       | Female | 2,695            | 0.8(-2.1%)                 | 4,140            | 1.0(-1.8%)                 | 1,605            | 0.4(-2.4%)                 | 227              | 0.1(-2.6%)                 | 38               | 0.0(-2.4%)                 |
|                                               | Male   | 3,227            | 0.9(-1.7%)                 | 4,082            | 0.9(-1.6%)                 | 1,706            | 0.4(-2.1%)                 | 302              | 0.1(-2.3%)                 | 38               | 0.0(-2.3%)                 |
| Sexually transmitted infections excluding HIV | Female | 21,752           | 6.3(-1.8%)                 | 9,361            | 2.2(-1.6%)                 | 5,363            | 1.2(-0.8%)                 | 772              | 0.4(-0.8%)                 | 74               | 0.1(-0.8%)                 |
|                                               | Male   | 26,236           | 7.4(-1.7%)                 | 11,039           | 2.5(-1.5%)                 | 6,866            | 1.4(-0.8%)                 | 972              | 0.4(-0.7%)                 | 83               | 0.1(-0.9%)                 |
| Tuberculosis                                  | Female | 27,582           | 8.0(-2.5%)                 | 19,614           | 4.7(-2.7%)                 | 6,215            | 1.4(-2.8%)                 | 818              | 0.4(-2.8%)                 | 54               | 0.0(-2.9%)                 |
|                                               | Male   | 33,257           | 9.4(-2.4%)                 | 19,351           | 4.4(-2.6%)                 | 8,416            | 1.8(-2.6%)                 | 1,098            | 0.5(-2.7%)                 | 46               | 0.0(-3.0%)                 |
| Upper respiratory infections                  | Female | 1,390            | 0.4(-2.8%)                 | 361              | 0.1(-3.1%)                 | 212              | 0.0(-3.1%)                 | 61               | 0.0(-3.1%)                 | 18               | 0.0(-2.8%)                 |
|                                               | Male   | 2,008            | 0.6(-2.7%)                 | 478              | 0.1(-2.9%)                 | 300              | 0.1(-3.0%)                 | 95               | 0.0(-3.0%)                 | 31               | 0.0(-2.7%)                 |
| Vaccine Preventable disease                   | Female | 78,629           | 22.7(-2.9%)                | 26,764           | 6.4(-3.1%)                 | 10,469           | 2.4(-3.0%)                 | 1,231            | 0.6(-3.1%)                 | 94               | 0.1(-3.2%)                 |
|                                               | Male   | 74,540           | 21.0(-2.9%)                | 24,910           | 5.7(-3.1%)                 | 10,623           | 2.2(-3.0%)                 | 1,222            | 0.6(-3.1%)                 | 97               | 0.1(-3.2%)                 |
| Total communicable                            | Female | 844,431          | 244.2(-2.4%)               | 418,482          | 99.9(-2.6%)                | 167,620          | 37.9(-2.6%)                | 23,105           | 11.5(-2.7%)                | 3,008            | 2.2(-2.4%)                 |
|                                               | Male   | 930,373          | 262.3(-2.4%)               | 432,557          | 98.6(-2.6%)                | 193,664          | 40.7(-2.6%)                | 28,747           | 13.2(-2.7%)                | 3,660            | 2.5(-2.4%)                 |

Note – For infectious skin disease deaths only bacterial skin disease contribute to this value as there are no deaths recorded for scabies, fungal and viral skin diseases.

**S7b. Number of deaths in 2019, deaths/100,000 in 2019 and change in deaths/100,000 from 1990-2019, for 5-9, 10-14, 15-19, 20-24, 0-24 year olds**

| Age group                                     |        | Under 5          |                            | 5-9              |                            | 10-14            |                            | 15-19            |                            | 20-24            |                            | 0-24             |                            |
|-----------------------------------------------|--------|------------------|----------------------------|------------------|----------------------------|------------------|----------------------------|------------------|----------------------------|------------------|----------------------------|------------------|----------------------------|
| Population in 2019                            |        | Female           |                            | Male             |                            | Female           |                            | Male             |                            | Female           |                            | Male             |                            |
|                                               |        | 320,443,936      |                            | 316,754,496      |                            | 310,852,512      |                            | 301,758,880      |                            | 295,776,256      |                            | 1,545,586,048    |                            |
|                                               |        | 342,398,752      |                            | 337,949,216      |                            | 331,334,176      |                            | 317,782,112      |                            | 304,368,224      |                            | 1,633,832,448    |                            |
|                                               |        | Number of deaths | Deaths/100,000 (change/pa) | Number of deaths | Deaths/100,000 (change/pa) | Number of deaths | Deaths/100,000 (change/pa) | Number of deaths | Deaths/100,000 (change/pa) | Number of deaths | Deaths/100,000 (change/pa) | Number of deaths | Deaths/100,000 (change/pa) |
| Enteric infection                             | Female | 266,985          | 83.3(-2.3%)                | 34,547           | 10.9(-1.9%)                | 21,904           | 7.0(-1.7%)                 | 17,220           | 5.7(-1.6%)                 | 14,360           | 4.9(-1.6%)                 | 355,016          | 23.0(-2.3%)                |
|                                               | Male   | 306,063          | 89.4(-2.3%)                | 40,519           | 12.0(-1.5%)                | 25,356           | 7.7(-1.5%)                 | 20,214           | 6.4(-1.5%)                 | 16,377           | 5.4(-1.3%)                 | 408,529          | 25.0(-2.2%)                |
| HIV/AIDS                                      | Female | 23,874           | 7.5(-1.2%)                 | 5,995            | 1.9(12.7%)                 | 7,250            | 2.3(120.9%)                | 14,814           | 4.9(2.9%)                  | 22,981           | 7.8(0.4%)                  | 74,914           | 4.8(0.2%)                  |
|                                               | Male   | 25,054           | 7.3(-1.2%)                 | 6,384            | 1.9(12.9%)                 | 7,863            | 2.4(78.8%)                 | 12,850           | 4.0(24.1%)                 | 11,884           | 3.9(3.0%)                  | 64,035           | 3.9(0.8%)                  |
| Hepatitis                                     | Female | 5,680            | 1.8(-2.6%)                 | 1,734            | 0.5(-2.5%)                 | 1,730            | 0.6(-1.9%)                 | 1,840            | 0.6(-2.0%)                 | 3,854            | 1.3(-1.6%)                 | 14,837           | 1.0(-2.3%)                 |
|                                               | Male   | 6,864            | 2.0(-2.5%)                 | 1,897            | 0.6(-2.2%)                 | 2,174            | 0.7(-1.6%)                 | 2,919            | 0.9(-1.6%)                 | 7,225            | 2.4(-1.1%)                 | 21,079           | 1.3(-2.1%)                 |
| Infectious skin conditions                    | Female | 2,329            | 0.7(-1.3%)                 | 200              | 0.1(-1.6%)                 | 209              | 0.1(-0.8%)                 | 278              | 0.1(-0.6%)                 | 261              | 0.1(-0.5%)                 | 3,278            | 0.2(-1.3%)                 |
|                                               | Male   | 1,299            | 0.4(-1.7%)                 | 142              | 0.0(-1.7%)                 | 211              | 0.1(-1.2%)                 | 403              | 0.1(-0.4%)                 | 365              | 0.1(-0.6%)                 | 2,421            | 0.1(-1.5%)                 |
| Lower respiratory infections                  | Female | 330,613          | 103.2(-2.3%)               | 13,490           | 4.3(-2.0%)                 | 7,053            | 2.3(-1.4%)                 | 6,065            | 2.0(-1.2%)                 | 6,760            | 2.3(-1.1%)                 | 363,980          | 23.5(-2.4%)                |
|                                               | Male   | 341,315          | 99.7(-2.4%)                | 14,050           | 4.2(-1.9%)                 | 7,794            | 2.4(-1.4%)                 | 7,473            | 2.4(-1.1%)                 | 8,934            | 2.9(-0.5%)                 | 379,566          | 23.2(-2.4%)                |
| Malaria                                       | Female | 182,099          | 56.8(-1.3%)                | 10,738           | 3.4(-2.2%)                 | 6,265            | 2.0(-1.9%)                 | 6,025            | 2.0(-1.3%)                 | 6,189            | 2.1(-1.2%)                 | 211,315          | 13.7(-1.5%)                |
|                                               | Male   | 174,264          | 50.9(-1.3%)                | 14,259           | 4.2(-2.0%)                 | 8,288            | 2.5(-1.8%)                 | 9,523            | 3.0(-0.7%)                 | 9,820            | 3.2(-0.2%)                 | 216,154          | 13.2(-1.5%)                |
| Maternal sepsis other maternal infections     | Female |                  | (.%)                       |                  | (.%)                       | 76               | 0.0(-1.9%)                 | 1,713            | 0.6(-2.3%)                 | 3,026            | 1.0(-2.4%)                 | 4,815            | 0.3(-2.3%)                 |
|                                               | Male   |                  | (.%)                       |                  | (.%)                       |                  | (.%)                       |                  | (.%)                       |                  | (.%)                       |                  | (.%)                       |
| Meningitis & Encephalitis                     | Female | 57,742           | 18.0(-2.3%)                | 8,923            | 2.8(-1.9%)                 | 6,512            | 2.1(-1.3%)                 | 5,146            | 1.7(-1.2%)                 | 4,631            | 1.6(-1.1%)                 | 82,954           | 5.4(-2.2%)                 |
|                                               | Male   | 71,317           | 20.8(-2.1%)                | 10,503           | 3.1(-1.7%)                 | 6,877            | 2.1(-1.2%)                 | 6,580            | 2.1(-1.0%)                 | 6,100            | 2.0(-0.7%)                 | 101,377          | 6.2(-2.0%)                 |
| Neglected Tropical disease                    | Female | 8,169            | 2.5(-2.4%)                 | 3,145            | 1.0(-2.4%)                 | 1,762            | 0.6(-2.2%)                 | 1,321            | 0.4(-2.1%)                 | 1,437            | 0.5(-2.0%)                 | 15,834           | 1.0(-2.4%)                 |
|                                               | Male   | 10,926           | 3.2(-2.3%)                 | 4,823            | 1.4(-2.4%)                 | 3,362            | 1.0(-2.3%)                 | 2,684            | 0.8(-2.2%)                 | 2,984            | 1.0(-2.0%)                 | 24,779           | 1.5(-2.3%)                 |
| Neonatal sepsis other neonatal infections     | Female | 100,303          | 31.3(-0.5%)                |                  | (.%)                       |                  | (.%)                       |                  | (.%)                       |                  | (.%)                       | 100,303          | 6.5(-0.8%)                 |
|                                               | Male   | 126,214          | 36.9(-0.6%)                |                  | (.%)                       |                  | (.%)                       |                  | (.%)                       |                  | (.%)                       | 126,214          | 7.7(-0.8%)                 |
| Other unspecified infectious diseases         | Female | 7,816            | 2.4(-1.2%)                 | 938              | 0.3(-1.3%)                 | 527              | 0.2(-0.8%)                 | 644              | 0.2(-0.6%)                 | 635              | 0.2(-0.4%)                 | 10,559           | 0.7(-1.2%)                 |
|                                               | Male   | 9,072            | 2.6(-1.5%)                 | 1,639            | 0.5(-0.7%)                 | 1,014            | 0.3(-0.5%)                 | 1,486            | 0.5(-0.3%)                 | 1,434            | 0.5(-0.1%)                 | 14,644           | 0.9(-1.3%)                 |
| Rheumatic heart disease                       | Female | 803              | 0.3(-2.7%)                 | 833              | 0.3(-2.1%)                 | 1,465            | 0.5(-1.6%)                 | 2,498            | 0.8(-1.7%)                 | 3,120            | 1.1(-1.7%)                 | 8,719            | 0.6(-1.9%)                 |
|                                               | Male   | 852              | 0.2(-2.4%)                 | 610              | 0.2(-2.0%)                 | 1,322            | 0.4(-1.4%)                 | 2,923            | 0.9(-1.3%)                 | 3,659            | 1.2(-1.3%)                 | 9,366            | 0.6(-1.6%)                 |
| Sexually transmitted infections excluding HIV | Female | 36,552           | 11.4(-0.7%)                | 208              | 0.1(-0.4%)                 | 70               | 0.0(-0.8%)                 | 206              | 0.1(-1.2%)                 | 337              | 0.1(-1.3%)                 | 37,374           | 2.4(-0.9%)                 |
|                                               | Male   | 44,876           | 13.1(-0.7%)                | 209              | 0.1(-0.4%)                 | 63               | 0.0(-1.9%)                 | 55               | 0.0(-1.5%)                 | 54               | 0.0(-1.5%)                 | 45,258           | 2.8(-0.9%)                 |
| Tuberculosis                                  | Female | 24,960           | 7.8(-2.6%)                 | 4,463            | 1.4(-2.5%)                 | 3,931            | 1.3(-2.2%)                 | 8,030            | 2.7(-2.1%)                 | 12,929           | 4.4(-2.1%)                 | 54,313           | 3.5(-2.5%)                 |
|                                               | Male   | 25,203           | 7.4(-2.6%)                 | 3,547            | 1.0(-2.5%)                 | 3,503            | 1.1(-2.2%)                 | 9,563            | 3.0(-1.7%)                 | 20,385           | 6.7(-1.5%)                 | 62,201           | 3.8(-2.3%)                 |
| Upper respiratory infections                  | Female | 1,787            | 0.6(-2.8%)                 | 142              | 0.0(-2.6%)                 | 57               | 0.0(-2.5%)                 | 30               | 0.0(-2.7%)                 | 27               | 0.0(-2.8%)                 | 2,043            | 0.1(-2.8%)                 |
|                                               | Male   | 2,505            | 0.7(-2.6%)                 | 161              | 0.0(-2.5%)                 | 124              | 0.0(-2.2%)                 | 70               | 0.0(-2.4%)                 | 54               | 0.0(-2.6%)                 | 2,915            | 0.2(-2.7%)                 |
| Vaccine Preventable disease                   | Female | 105,018          | 32.8(-2.8%)                | 8,357            | 2.6(-2.8%)                 | 2,125            | 0.7(-2.8%)                 | 1,014            | 0.3(-2.8%)                 | 764              | 0.3(-2.8%)                 | 117,278          | 7.6(-2.8%)                 |
|                                               | Male   | 99,829           | 29.2(-2.8%)                | 7,419            | 2.2(-2.8%)                 | 2,081            | 0.6(-2.8%)                 | 1,242            | 0.4(-2.7%)                 | 909              | 0.3(-2.6%)                 | 111,480          | 6.8(-2.8%)                 |
| Total communicable                            | Female | 1,154,730        | 360.4(-2.2%)               | 93,711           | 29.6(-2.1%)                | 60,936           | 19.6(-1.7%)                | 66,846           | 22.2(-1.4%)                | 81,310           | 27.5(-1.4%)                | 1,457,533        | 94.3(-2.2%)                |
|                                               | Male   | 1,245,653        | 363.8(-2.2%)               | 106,164          | 31.4(-1.9%)                | 70,032           | 21.1(-1.5%)                | 77,986           | 24.5(-1.1%)                | 90,184           | 29.6(-1.0%)                | 1,590,018        | 97.3(-2.2%)                |

Note – For infectious skin disease deaths only bacterial skin disease contribute to this value as there are no deaths recorded for scabies, fungal and viral skin diseases.

**S8a. Number of DALYs in 2019, DALYs/100,000 in 2019 and change in DALYs/100,000 from 1990-2019, in 0-24 year olds by SDI groups**

| SDI group                                     |        | Low             |                           | Low-Mid         |                           | Middle          |                           | High-mid        |                           | High            |                           |
|-----------------------------------------------|--------|-----------------|---------------------------|-----------------|---------------------------|-----------------|---------------------------|-----------------|---------------------------|-----------------|---------------------------|
| Population in 2019                            | Female | 345,856,384     |                           | 418,727,616     |                           | 442,771,136     |                           | 200,230,976     |                           | 137,035,328     |                           |
|                                               | Male   | 354,697,440     |                           | 438,510,272     |                           | 476,123,648     |                           | 217,982,720     |                           | 145,509,888     |                           |
|                                               |        | Number of DALYs | DALYs/100 000 (change/pa) | Number of DALYs | DALYs/100 000 (change/pa) | Number of DALYs | DALYs/100 000 (change/pa) | Number of DALYs | DALYs/100 000 (change/pa) | Number of DALYs | DALYs/100 000 (change/pa) |
| Enteric infections                            | Female | 19,075,428      | 5,515.4(-2.3%)            | 9,538,265       | 2,277.9(-2.7%)            | 3,147,428       | 710.8(-2.6%)              | 520,888         | 260.1(-2.4%)              | 122,146         | 89.1(-1.3%)               |
|                                               | Male   | 22,787,265      | 6,424.4(-2.3%)            | 10,013,959      | 2,283.6(-2.6%)            | 3,540,307       | 743.6(-2.6%)              | 599,575         | 275.1(-2.5%)              | 141,070         | 96.9(-1.3%)               |
| HIV/AIDS                                      | Female | 2,853,953       | 825.2(-2.0%)              | 1,796,668       | 429.1(0.6%)               | 1,261,721       | 285.0(14.3%)              | 121,038         | 60.4(3.2%)                | 12,885          | 9.4(-2.3%)                |
|                                               | Male   | 2,467,002       | 695.5(-1.7%)              | 1,509,491       | 344.2(1.2%)               | 1,097,235       | 230.5(12.1%)              | 132,398         | 60.7(0.7%)                | 16,229          | 11.2(-2.6%)               |
| Hepatitis                                     | Female | 398,121         | 115.1(-2.3%)              | 600,135         | 143.3(-2.4%)              | 202,507         | 45.7(-2.7%)               | 39,859          | 19.9(-2.5%)               | 8,214           | 6.0(-1.6%)                |
|                                               | Male   | 547,914         | 154.5(-2.2%)              | 740,650         | 168.9(-2.2%)              | 333,885         | 70.1(-2.3%)               | 78,758          | 36.1(-2.1%)               | 12,256          | 8.4(-1.8%)                |
| Infectious skin conditions                    | Female | 896,698         | 259.3(-0.4%)              | 980,275         | 234.1(-0.5%)              | 1,024,194       | 231.3(-0.3%)              | 418,377         | 208.9(-0.1%)              | 295,983         | 216.0(-0.0%)              |
|                                               | Male   | 972,585         | 274.2(-0.3%)              | 1,046,302       | 238.6(-0.4%)              | 1,159,447       | 243.5(-0.3%)              | 456,586         | 209.5(-0.2%)              | 235,118         | 161.6(-0.0%)              |
| Lower respiratory infections                  | Female | 17,035,295      | 4,925.5(-2.3%)            | 9,939,668       | 2,373.8(-2.6%)            | 4,015,181       | 906.8(-2.8%)              | 599,061         | 299.2(-2.9%)              | 81,359          | 59.4(-2.3%)               |
|                                               | Male   | 17,833,771      | 5,027.9(-2.4%)            | 9,616,491       | 2,193.0(-2.7%)            | 4,689,280       | 984.9(-2.8%)              | 747,635         | 343.0(-2.9%)              | 98,033          | 67.4(-2.3%)               |
| Malaria                                       | Female | 13,522,927      | 3,910.0(-2.1%)            | 3,986,266       | 952.0(-2.0%)              | 1,508,469       | 340.7(-2.0%)              | 144,364         | 72.1(-2.1%)               | 54              | 0.0(-3.2%)                |
|                                               | Male   | 13,424,993      | 3,784.9(-2.1%)            | 4,000,548       | 912.3(-2.0%)              | 1,585,028       | 332.9(-1.9%)              | 157,360         | 72.2(-1.9%)               | 43              | 0.0(-3.2%)                |
| Maternal sepsis and other maternal infections | Female | 252,528         | 73.0(-2.0%)               | 81,005          | 19.3(-2.8%)               | 27,607          | 6.2(-2.8%)                | 6,423           | 3.2(-2.7%)                | 1,998           | 1.5(-2.0%)                |
|                                               | Male   | 0               | 0.0(%)                    | 0               | 0.0(%)                    | 0               | 0.0(%)                    | 0               | 0.0(%)                    | 0               | 0.0(%)                    |
| Meningitis & Encephalitis                     | Female | 4,094,503       | 1,183.9(-2.3%)            | 2,028,189       | 484.4(-2.6%)              | 866,747         | 195.8(-2.5%)              | 179,025         | 89.4(-2.6%)               | 34,896          | 25.5(-2.3%)               |
|                                               | Male   | 5,063,320       | 1,427.5(-2.1%)            | 2,318,504       | 528.7(-2.4%)              | 1,108,703       | 232.9(-2.5%)              | 230,819         | 105.9(-2.6%)              | 40,935          | 28.1(-2.3%)               |
| Neglected Tropical diseases                   | Female | 1,681,026       | 486.0(-2.4%)              | 1,041,461       | 248.7(-2.2%)              | 751,721         | 169.8(-1.9%)              | 129,699         | 64.8(-1.8%)               | 15,362          | 11.2(-1.6%)               |
|                                               | Male   | 2,123,772       | 598.8(-2.6%)              | 1,293,521       | 295.0(-2.2%)              | 874,673         | 183.7(-1.8%)              | 156,727         | 71.9(-1.7%)               | 13,683          | 9.4(-1.6%)                |
| Neonatal sepsis and other neonatal infections | Female | 4,550,609       | 1,315.8(-1.1%)            | 3,090,678       | 738.1(-1.4%)              | 1,746,868       | 394.5(-0.5%)              | 437,317         | 218.4(-0.4%)              | 76,620          | 55.9(-1.6%)               |
|                                               | Male   | 5,686,922       | 1,603.3(-1.2%)            | 3,737,984       | 852.4(-1.4%)              | 2,233,294       | 469.1(-0.8%)              | 507,032         | 232.6(-0.7%)              | 96,470          | 66.3(-1.6%)               |
| Other unspecified infectious diseases         | Female | 665,941         | 192.5(-1.3%)              | 456,912         | 109.1(-1.5%)              | 224,471         | 50.7(-1.4%)               | 71,588          | 35.8(-1.4%)               | 32,998          | 24.1(-0.7%)               |
|                                               | Male   | 748,059         | 210.9(-1.4%)              | 594,670         | 135.6(-1.5%)              | 260,096         | 54.6(-1.7%)               | 84,113          | 38.6(-1.6%)               | 35,419          | 24.3(-0.7%)               |
| Rheumatic heart disease                       | Female | 319,955         | 92.5(-1.7%)               | 419,346         | 100.1(-1.5%)              | 206,706         | 46.7(-2.0%)               | 36,427          | 18.2(-2.0%)               | 3,540           | 2.6(-2.2%)                |
|                                               | Male   | 348,531         | 98.3(-1.4%)               | 391,372         | 89.3(-1.3%)               | 205,762         | 43.2(-1.7%)               | 39,493          | 18.1(-1.9%)               | 3,497           | 2.4(-2.2%)                |
| Sexually transmitted infections excluding HIV | Female | 1,947,819       | 563.2(-1.8%)              | 846,292         | 202.1(-1.6%)              | 492,293         | 111.2(-0.8%)              | 74,900          | 37.4(-0.7%)               | 12,148          | 8.9(-0.6%)                |
|                                               | Male   | 2,337,291       | 659.0(-1.7%)              | 994,800         | 226.9(-1.5%)              | 628,342         | 132.0(-0.8%)              | 93,341          | 42.8(-0.7%)               | 9,342           | 6.4(-0.7%)                |
| Tuberculosis                                  | Female | 2,482,598       | 717.8(-2.5%)              | 1,777,838       | 424.6(-2.7%)              | 629,988         | 142.3(-2.7%)              | 86,176          | 43.0(-2.7%)               | 6,635           | 4.8(-2.8%)                |
|                                               | Male   | 2,806,482       | 791.2(-2.4%)              | 1,624,346       | 370.4(-2.6%)              | 744,067         | 156.3(-2.6%)              | 103,754         | 47.6(-2.7%)               | 5,544           | 3.8(-2.8%)                |
| Upper respiratory infections                  | Female | 556,325         | 160.9(-1.8%)              | 585,739         | 139.9(-1.3%)              | 577,598         | 130.5(-1.0%)              | 248,809         | 124.3(-0.8%)              | 197,267         | 144.0(-0.1%)              |
|                                               | Male   | 666,331         | 187.9(-1.7%)              | 677,817         | 154.6(-1.1%)              | 684,709         | 143.8(-1.0%)              | 291,733         | 133.8(-0.8%)              | 210,583         | 144.7(-0.2%)              |
| Vaccine Preventable disease                   | Female | 6,820,150       | 1,972.0(-2.9%)            | 2,334,566       | 557.5(-3.1%)              | 926,818         | 209.3(-3.0%)              | 113,518         | 56.7(-3.0%)               | 12,598          | 9.2(-3.1%)                |
|                                               | Male   | 6,462,075       | 1,821.9(-2.9%)            | 2,172,580       | 495.4(-3.1%)              | 937,017         | 196.8(-3.0%)              | 112,274         | 51.5(-3.1%)               | 12,386          | 8.5(-3.1%)                |
| Total communicable                            | Female | 77,153,876      | 22,308.1(-2.4%)           | 39,503,305      | 9,434.1(-2.6%)            | 17,610,318      | 3,977.3(-2.4%)            | 3,227,471       | 1,611.9(-2.4%)            | 914,703         | 667.5(-1.5%)              |
|                                               | Male   | 84,276,312      | 23,760.1(-2.3%)           | 40,733,035      | 9,289.0(-2.5%)            | 20,081,847      | 4,217.8(-2.4%)            | 3,791,599       | 1,739.4(-2.4%)            | 930,610         | 639.6(-1.6%)              |

The sum of the four groups is less than the total from the age based table as the age based table is calculated from global numbers which account for misplace people who would not be included in any of the income groups.

**S8b. Number of DALYs in 2019, DALYs/100,000 in 2019 and change in DALYs/100,000 from 1990-2019, for 5-9, 10-14, 15-19, 20-24, 0-24 year olds**

| Age group                                     |        | Under 5                   |                 | 5-9                       |                | 10-14                     |                | 15-19                     |                | 20-24                     |                | 0-24                      |                |
|-----------------------------------------------|--------|---------------------------|-----------------|---------------------------|----------------|---------------------------|----------------|---------------------------|----------------|---------------------------|----------------|---------------------------|----------------|
| Population in 2019                            |        | Female                    |                 | Male                      |                | Female                    |                | Male                      |                | Female                    |                | Male                      |                |
|                                               |        | 320,443,936               |                 | 316,754,496               |                | 310,852,512               |                | 301,758,880               |                | 295,776,256               |                | 1,545,586,048             |                |
|                                               |        | 342,398,752               |                 | 337,949,216               |                | 331,334,176               |                | 317,782,112               |                | 304,368,224               |                | 1,633,832,448             |                |
|                                               |        | Number of DALYs           |                 | Number of DALYs           |                | Number of DALYs           |                | Number of DALYs           |                | Number of DALYs           |                | Number of DALYs           |                |
|                                               |        | DALYs/100,000 (change/pa) |                 | DALYs/100,000 (change/pa) |                | DALYs/100,000 (change/pa) |                | DALYs/100,000 (change/pa) |                | DALYs/100,000 (change/pa) |                | DALYs/100,000 (change/pa) |                |
| Enteric infections                            | Female | 24,164,588                | 7,541.0(-2.3%)  | 3,306,889                 | 1,044.0(-1.8%) | 2,127,264                 | 684.3(-1.5%)   | 1,575,404                 | 522.1(-1.4%)   | 1,246,589                 | 421.5(-1.3%)   | 32,420,734                | 2,097.6(-2.2%) |
|                                               | Male   | 27,646,714                | 8,074.4(-2.2%)  | 3,835,011                 | 1,134.8(-1.4%) | 2,425,165                 | 731.9(-1.3%)   | 1,807,909                 | 568.9(-1.3%)   | 1,387,350                 | 455.8(-1.1%)   | 37,102,149                | 2,270.9(-2.2%) |
| HIV/AIDS                                      | Female | 2,100,134                 | 655.4(-1.2%)    | 524,405                   | 165.6(13.3%)   | 593,767                   | 191.0(128.2%)  | 1,138,905                 | 377.4(2.7%)    | 1,694,269                 | 572.8(0.5%)    | 6,051,479                 | 391.5(0.2%)    |
|                                               | Male   | 2,204,065                 | 643.7(-1.2%)    | 557,569                   | 165.0(13.5%)   | 641,350                   | 193.6(83.6%)   | 959,441                   | 301.9(22.3%)   | 864,480                   | 284.0(3.0%)    | 5,226,905                 | 319.9(0.6%)    |
| Hepatitis                                     | Female | 504,063                   | 157.3(-2.6%)    | 164,003                   | 51.8(-2.4%)    | 154,941                   | 49.8(-1.7%)    | 150,804                   | 50.0(-1.8%)    | 275,412                   | 93.1(-1.5%)    | 1,249,223                 | 80.8(-2.3%)    |
|                                               | Male   | 607,837                   | 177.5(-2.5%)    | 179,116                   | 53.0(-2.1%)    | 191,853                   | 57.9(-1.5%)    | 230,867                   | 72.6(-1.5%)    | 504,328                   | 165.7(-1.1%)   | 1,714,000                 | 104.9(-2.1%)   |
| Infectious skin conditions                    | Female | 894,462                   | 279.1(-0.5%)    | 944,189                   | 298.1(-0.1%)   | 706,137                   | 227.2(-0.1%)   | 573,846                   | 190.2(-0.2%)   | 499,363                   | 168.8(-0.3%)   | 3,617,998                 | 234.1(-0.3%)   |
|                                               | Male   | 870,211                   | 254.2(-0.4%)    | 1,032,822                 | 305.6(0.0%)    | 794,667                   | 239.8(-0.0%)   | 639,119                   | 201.1(-0.2%)   | 535,926                   | 176.1(-0.3%)   | 3,872,745                 | 237.0(-0.2%)   |
| Lower respiratory infections                  | Female | 29,100,814                | 9,081.4(-2.3%)  | 1,124,192                 | 354.9(-2.0%)   | 555,592                   | 178.7(-1.4%)   | 448,732                   | 148.7(-1.2%)   | 464,553                   | 157.1(-1.1%)   | 31,693,883                | 2,050.6(-2.4%) |
|                                               | Male   | 30,061,424                | 8,779.7(-2.4%)  | 1,173,333                 | 347.2(-1.9%)   | 617,011                   | 186.2(-1.4%)   | 551,105                   | 173.4(-1.1%)   | 609,620                   | 200.3(-0.5%)   | 33,012,493                | 2,020.6(-2.4%) |
| Malaria                                       | Female | 16,130,097                | 5,033.7(-1.3%)  | 1,156,017                 | 365.0(-2.0%)   | 656,941                   | 211.3(-1.7%)   | 672,479                   | 222.9(-0.8%)   | 551,438                   | 186.4(-1.0%)   | 19,166,971                | 1,240.1(-1.5%) |
|                                               | Male   | 15,463,934                | 4,516.4(-1.3%)  | 1,451,711                 | 429.6(-1.8%)   | 801,713                   | 242.0(-1.6%)   | 755,664                   | 237.8(-0.6%)   | 699,655                   | 229.9(-0.2%)   | 19,172,678                | 1,173.5(-1.4%) |
| Maternal sepsis & other maternal infections   | Female | 0                         | 0.0(%)          | 0                         | 0.0(%)         | 6,037                     | 1.9(-1.9%)     | 134,087                   | 44.4(-2.3%)    | 229,815                   | 77.7(-2.3%)    | 369,940                   | 23.9(-2.2%)    |
|                                               | Male   | 0                         | 0.0(%)          | 0                         | 0.0(%)         | 0                         | 0.0(%)         | 0                         | 0.0(%)         | 0                         | 0.0(%)         | 0                         | 0.0(%)         |
| Meningitis & Encephalitis                     | Female | 5,084,721                 | 1,586.8(-2.2%)  | 784,736                   | 247.7(-1.8%)   | 555,021                   | 178.5(-1.3%)   | 423,224                   | 140.3(-1.1%)   | 360,050                   | 121.7(-1.1%)   | 7,207,751                 | 466.3(-2.2%)   |
|                                               | Male   | 6,277,229                 | 1,833.3(-2.0%)  | 918,338                   | 271.7(-1.7%)   | 586,505                   | 177.0(-1.2%)   | 527,518                   | 166.0(-1.0%)   | 458,133                   | 150.5(-0.7%)   | 8,767,715                 | 536.6(-2.0%)   |
| Neglected Tropical diseases                   | Female | 1,048,491                 | 327.2(-2.2%)    | 826,181                   | 260.8(-1.8%)   | 622,122                   | 200.1(-1.6%)   | 557,018                   | 184.6(-1.7%)   | 567,762                   | 192.0(-1.7%)   | 3,621,573                 | 234.3(-1.9%)   |
|                                               | Male   | 1,320,522                 | 385.7(-2.1%)    | 1,065,237                 | 315.2(-2.0%)   | 800,639                   | 241.6(-2.0%)   | 635,252                   | 199.9(-2.0%)   | 643,604                   | 211.5(-1.9%)   | 4,465,253                 | 273.3(-2.1%)   |
| Neonatal sepsis & other neonatal infections   | Female | 9,127,055                 | 2,848.3(-0.5%)  | 205,259                   | 64.8(9.2%)     | 199,165                   | 64.1(9.8%)     | 191,183                   | 63.4(10.1%)    | 185,663                   | 62.8(10.4%)    | 9,908,325                 | 641.1(-0.6%)   |
|                                               | Male   | 11,446,419                | 3,343.0(-0.6%)  | 221,648                   | 65.6(10.6%)    | 214,178                   | 64.6(11.6%)    | 200,499                   | 63.1(12.1%)    | 187,472                   | 61.6(12.5%)    | 12,270,216                | 751.0(-0.7%)   |
| Other unspecified infectious diseases         | Female | 844,424                   | 263.5(-1.1%)    | 248,799                   | 78.5(-0.5%)    | 154,586                   | 49.7(-0.3%)    | 116,917                   | 38.7(0.0%)     | 87,946                    | 29.7(-0.2%)    | 1,452,672                 | 94.0(-0.9%)    |
|                                               | Male   | 972,133                   | 283.9(-1.4%)    | 319,505                   | 94.5(-0.3%)    | 167,060                   | 50.4(-0.3%)    | 142,816                   | 44.9(-0.2%)    | 122,036                   | 40.1(-0.2%)    | 1,723,549                 | 105.5(-1.1%)   |
| Rheumatic heart disease                       | Female | 75,049                    | 23.4(-2.6%)     | 102,645                   | 32.4(-1.7%)    | 186,079                   | 59.9(-1.1%)    | 288,440                   | 95.6(-1.2%)    | 335,027                   | 113.3(-1.3%)   | 987,240                   | 63.9(-1.5%)    |
|                                               | Male   | 79,217                    | 23.1(-2.3%)     | 83,640                    | 24.7(-1.6%)    | 171,236                   | 51.7(-0.9%)    | 306,664                   | 96.5(-1.0%)    | 348,993                   | 114.7(-1.0%)   | 989,751                   | 60.6(-1.2%)    |
| Sexually transmitted infections excluding HIV | Female | 3,243,285                 | 1,012.1(-0.7%)  | 17,001                    | 5.4(-0.4%)     | 8,378                     | 2.7(-0.5%)     | 33,591                    | 11.1(-0.6%)    | 75,786                    | 25.6(-0.4%)    | 3,378,042                 | 218.6(-0.9%)   |
|                                               | Male   | 3,981,035                 | 1,162.7(-0.7%)  | 17,112                    | 5.1(-0.4%)     | 9,147                     | 2.8(-1.5%)     | 23,936                    | 7.5(-0.4%)     | 37,512                    | 12.3(-0.2%)    | 4,068,741                 | 249.0(-0.9%)   |
| Tuberculosis                                  | Female | 2,282,353                 | 712.2(-2.6%)    | 485,690                   | 153.3(-2.4%)   | 383,643                   | 123.4(-2.1%)   | 705,436                   | 233.8(-2.0%)   | 1,128,727                 | 381.6(-1.9%)   | 4,985,849                 | 322.6(-2.4%)   |
|                                               | Male   | 2,274,292                 | 664.2(-2.5%)    | 362,249                   | 107.2(-2.4%)   | 301,286                   | 90.9(-2.1%)    | 774,020                   | 243.6(-1.6%)   | 1,575,194                 | 517.5(-1.4%)   | 5,287,040                 | 323.6(-2.3%)   |
| Upper respiratory infections                  | Female | 640,445                   | 199.9(-1.9%)    | 472,485                   | 149.2(-0.4%)   | 375,439                   | 120.8(-0.2%)   | 349,916                   | 116.0(-0.2%)   | 328,837                   | 111.2(-0.3%)   | 2,167,122                 | 140.2(-1.1%)   |
|                                               | Male   | 759,398                   | 221.8(-1.7%)    | 539,926                   | 159.8(-0.3%)   | 441,900                   | 133.4(-0.3%)   | 410,321                   | 129.1(-0.2%)   | 381,236                   | 125.3(-0.3%)   | 2,532,781                 | 155.0(-1.0%)   |
| Vaccine Preventable disease                   | Female | 9,225,050                 | 2,878.8(-2.8%)  | 690,975                   | 218.1(-2.8%)   | 166,661                   | 53.6(-2.8%)    | 76,908                    | 25.5(-2.8%)    | 56,081                    | 19.0(-2.7%)    | 10,215,674                | 661.0(-2.8%)   |
|                                               | Male   | 8,768,615                 | 2,560.9(-2.8%)  | 613,069                   | 181.4(-2.8%)   | 163,265                   | 49.3(-2.8%)    | 93,244                    | 29.3(-2.7%)    | 65,729                    | 21.6(-2.6%)    | 9,703,923                 | 593.9(-2.8%)   |
| Total communicable                            | Female | 104,465,027               | 32,600.1(-2.2%) | 11,053,467                | 3,489.6(-1.9%) | 7,451,772                 | 2,397.2(-1.3%) | 7,436,890                 | 2,464.5(-1.2%) | 8,087,317                 | 2,734.3(-1.2%) | 138,494,472               | 8,960.6(-2.2%) |
|                                               | Male   | 112,733,037               | 32,924.5(-2.2%) | 12,370,285                | 3,660.4(-1.7%) | 8,326,975                 | 2,513.2(-1.3%) | 8,058,373                 | 2,535.8(-1.0%) | 8,421,269                 | 2,766.8(-0.9%) | 149,909,939               | 9,175.4(-2.2%) |

S9. Proportion of communicable disease DALYs and deaths in 2019 attributed by each specific cause, by age, sex and SDI

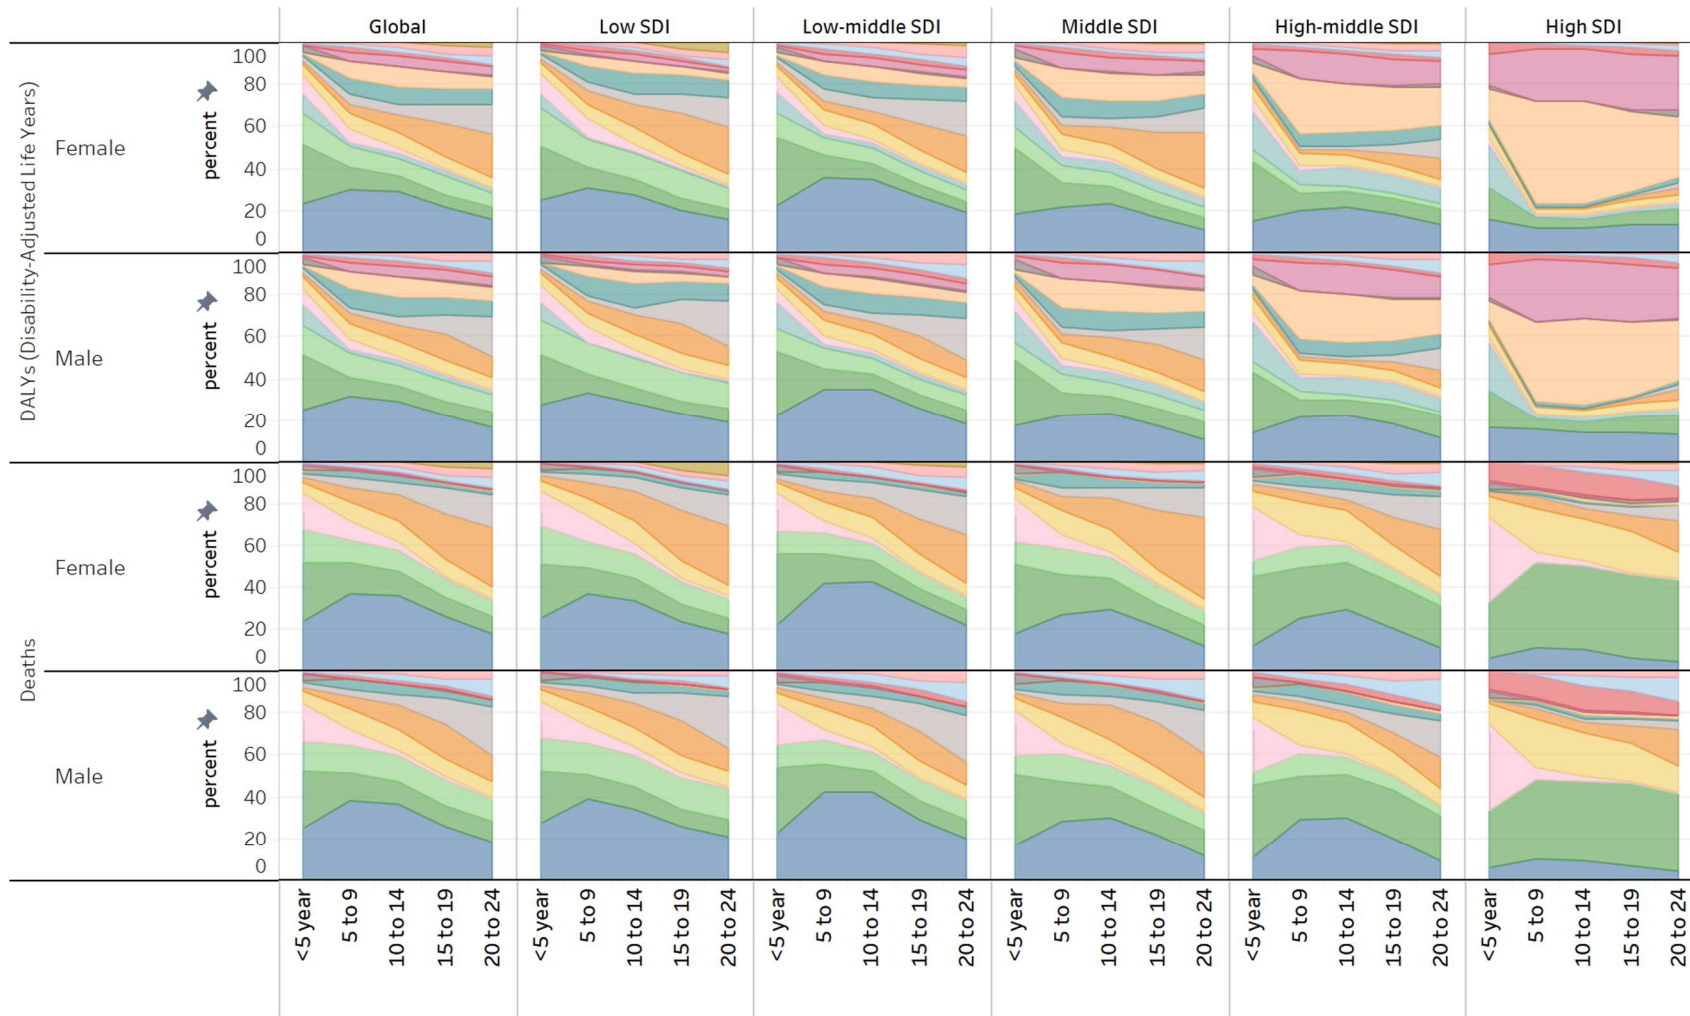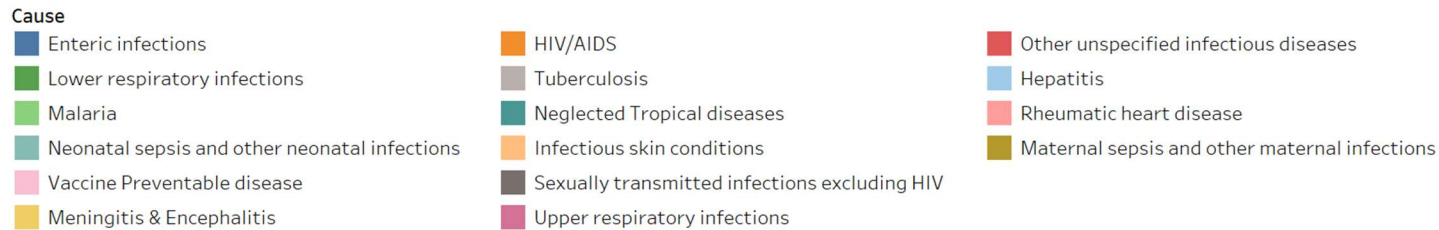

S10. Communicable disease burden (DALYs) among 0-24-year-olds borne by each age group over time as (A) proportion (B) number.

A

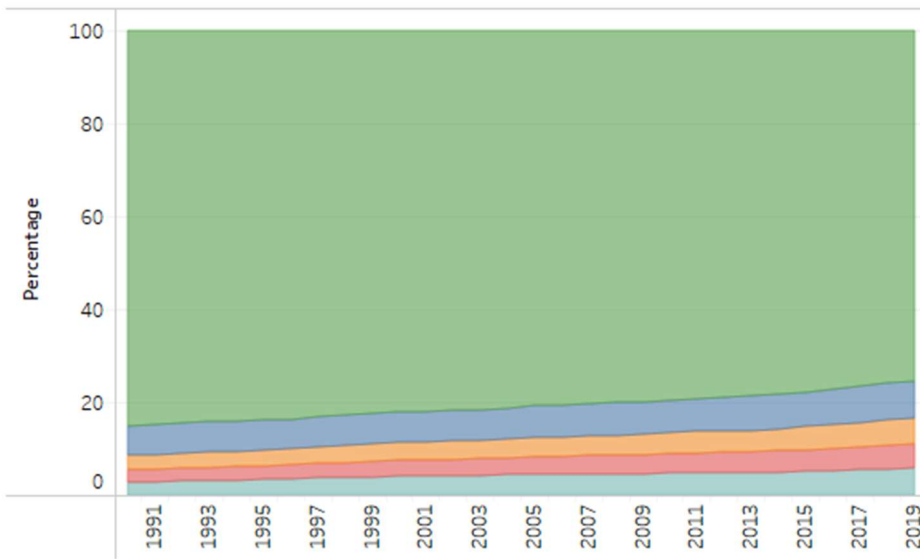

B

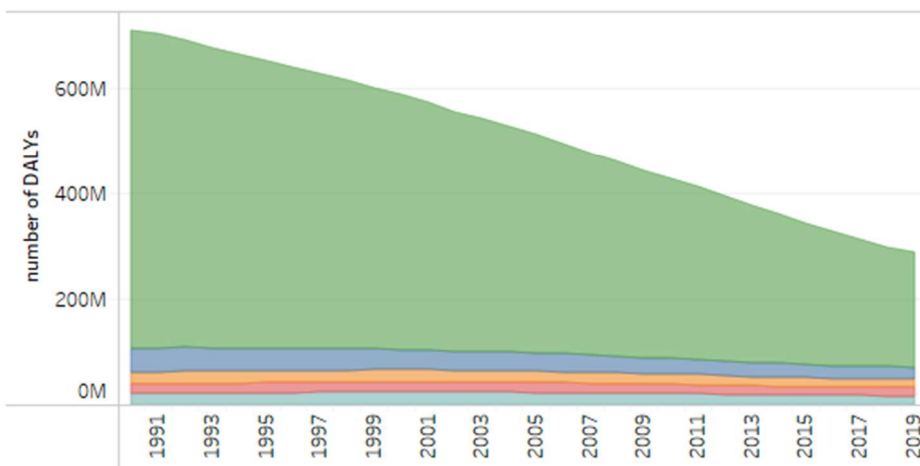

Age  
■ <5 year    ■ 5 to 9    ■ 10 to 14    ■ 15 to 19    ■ 20 to 24



**S11** Deaths among 0-24-year-olds borne by each age group over time as (A) proportion (B) number.

**A.** The percentage of 0 to 24 year old deaths borne by each age group from 1990 to 2019

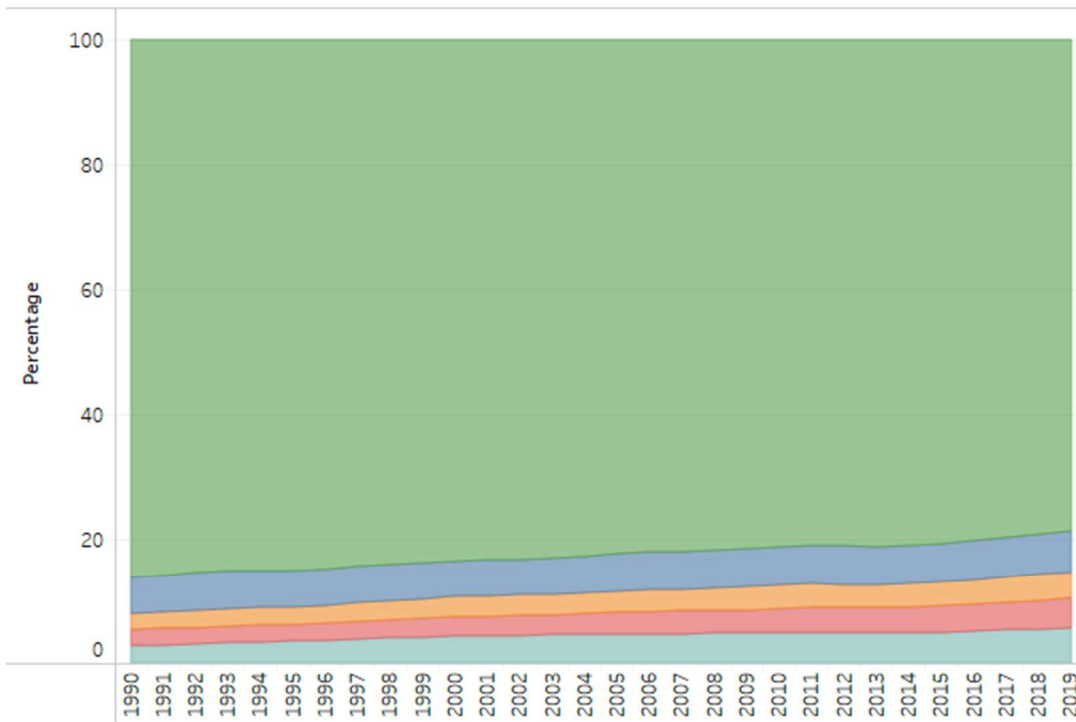

**B.** The number of deaths from 1990 to 2019 for 0 to 24 year olds

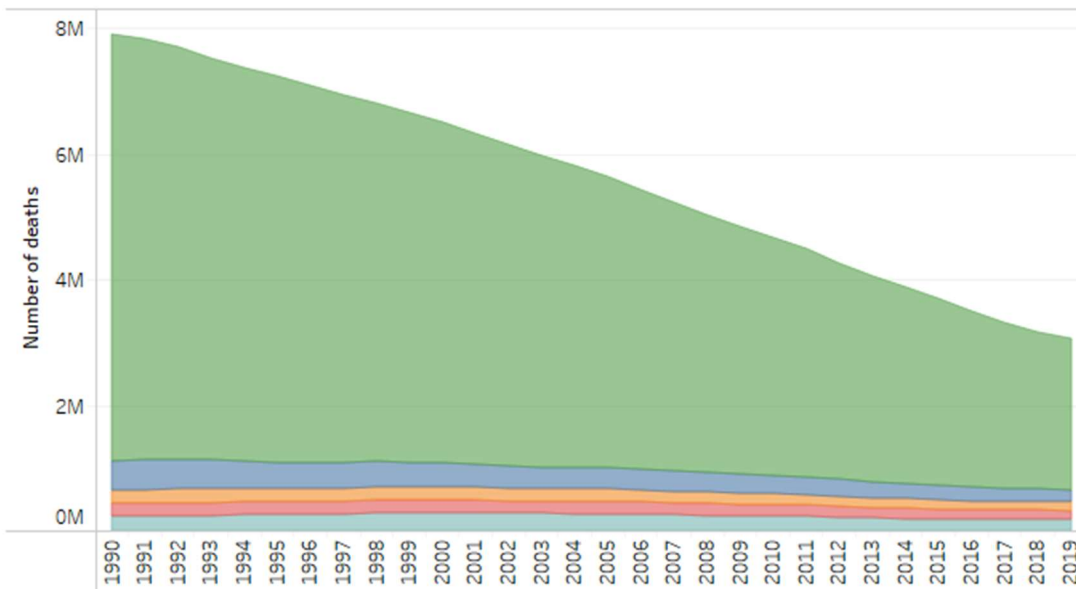

Age

- <5 year
- 5 to 9
- 10 to 14
- 15 to 19
- 20 to 24

**S12. (A)** Communicable disease DALYs by cause for under 5 year olds by sex in 2019, grouped by SDI. The shading ranges from green which indicates a low number of DALYs per 100,000 for that country with in the disease, while the highest rates are shaded in a dark orange colour and indicates a country has a large DALY burden.

|                             |                          | Under 5 years, DALYs/100,000, for males and females, 2019 |         |                    |        |                              |        |         |        |                                               |        |                             |        |                           |        |          |        |              |        |                             |       |                            |       |                                               |       |                              |       |                                       |       |           |      |                         |      |
|-----------------------------|--------------------------|-----------------------------------------------------------|---------|--------------------|--------|------------------------------|--------|---------|--------|-----------------------------------------------|--------|-----------------------------|--------|---------------------------|--------|----------|--------|--------------|--------|-----------------------------|-------|----------------------------|-------|-----------------------------------------------|-------|------------------------------|-------|---------------------------------------|-------|-----------|------|-------------------------|------|
|                             |                          | Total communicable                                        |         | Enteric infections |        | Lower respiratory infections |        | Malaria |        | Neonatal sepsis and other neonatal infections |        | Vaccine Preventable disease |        | Meningitis & Encephalitis |        | HIV/AIDS |        | Tuberculosis |        | Neglected Tropical diseases |       | Infectious skin conditions |       | Sexually transmitted infections excluding HIV |       | Upper respiratory infections |       | Other unspecified infectious diseases |       | Hepatitis |      | Rheumatic heart disease |      |
|                             |                          | Female                                                    | Male    | Female             | Male   | Female                       | Male   | Female  | Male   | Female                                        | Male   | Female                      | Male   | Female                    | Male   | Female   | Male   | Female       | Male   | Female                      | Male  | Female                     | Male  | Female                                        | Male  | Female                       | Male  | Female                                | Male  | Female    | Male | Female                  | Male |
| Low SDI                     | Afghanistan              | 38,220                                                    | 35,157  | 6,460              | 5,954  | 19,632                       | 16,995 | 120     | 155    | 1,397                                         | 1,932  | 6,643                       | 6,094  | 1,581                     | 1,490  | 128      | 129    | 431          | 489    | 167                         | 174   | 142                        | 147   | 460                                           | 525   | 162                          | 178   | 552                                   | 388   | 326       | 493  | 20                      | 16   |
|                             | Benin                    | 95,402                                                    | 98,354  | 15,227             | 15,527 | 19,729                       | 21,162 | 32,258  | 28,865 | 7,094                                         | 8,105  | 12,399                      | 13,165 | 4,073                     | 5,939  | 735      | 712    | 1,294        | 1,683  | 888                         | 1,284 | 304                        | 266   | 733                                           | 905   | 150                          | 158   | 357                                   | 269   | 123       | 228  | 39                      | 87   |
|                             | Burkina Faso             | 134,167                                                   | 131,923 | 27,282             | 29,690 | 36,222                       | 35,383 | 37,878  | 34,062 | 9,247                                         | 9,285  | 7,703                       | 6,590  | 7,162                     | 8,077  | 714      | 735    | 3,420        | 3,274  | 1,407                       | 1,791 | 483                        | 295   | 1,487                                         | 1,732 | 227                          | 217   | 689                                   | 538   | 152       | 94   | 95                      | 102  |
|                             | Burundi                  | 70,633                                                    | 80,352  | 17,709             | 31,553 | 11,679                       | 9,649  | 26,229  | 23,272 | 5,602                                         | 6,983  | 2,718                       | 2,156  | 2,020                     | 1,972  | 849      | 861    | 2,034        | 1,904  | 250                         | 377   | 352                        | 296   | 277                                           | 322   | 436                          | 561   | 378                                   | 360   | 69        | 55   | 32                      | 30   |
|                             | Central African Republic | 150,560                                                   | 178,766 | 41,740             | 74,669 | 31,123                       | 37,146 | 29,026  | 20,245 | 5,840                                         | 6,823  | 15,096                      | 12,587 | 4,588                     | 3,735  | 1,402    | 1,335  | 14,992       | 14,124 | 479                         | 613   | 341                        | 287   | 4,409                                         | 5,150 | 710                          | 1,011 | 607                                   | 803   | 151       | 185  | 56                      | 53   |
|                             | Chad                     | 154,551                                                   | 165,060 | 68,657             | 69,075 | 32,702                       | 39,572 | 13,203  | 10,847 | 6,855                                         | 9,382  | 15,311                      | 14,582 | 7,142                     | 9,917  | 1,041    | 992    | 4,134        | 3,992  | 1,081                       | 1,485 | 296                        | 254   | 3,052                                         | 3,569 | 192                          | 186   | 640                                   | 627   | 180       | 490  | 56                      | 89   |
|                             | Côte d'Ivoire            | 82,453                                                    | 82,998  | 11,046             | 12,861 | 18,930                       | 20,106 | 33,737  | 28,251 | 6,443                                         | 8,012  | 3,790                       | 3,794  | 1,955                     | 2,242  | 2,020    | 2,077  | 1,192        | 1,569  | 626                         | 886   | 256                        | 240   | 1,842                                         | 2,281 | 147                          | 150   | 397                                   | 388   | 49        | 95   | 23                      | 44   |
|                             | Dem. Rep. of the Congo   | 67,047                                                    | 73,927  | 9,408              | 18,365 | 9,414                        | 8,764  | 30,082  | 27,336 | 3,448                                         | 4,494  | 5,173                       | 4,882  | 1,424                     | 1,190  | 611      | 613    | 2,902        | 2,876  | 507                         | 502   | 275                        | 255   | 3,120                                         | 3,802 | 277                          | 335   | 356                                   | 421   | 34        | 72   | 14                      | 20   |
|                             | Eritrea                  | 43,122                                                    | 48,233  | 16,537             | 19,855 | 12,633                       | 13,238 | 410     | 315    | 4,185                                         | 5,477  | 2,871                       | 2,353  | 1,846                     | 1,883  | 740      | 730    | 1,441        | 1,644  | 302                         | 413   | 383                        | 319   | 887                                           | 1,021 | 347                          | 490   | 446                                   | 412   | 64        | 54   | 32                      | 30   |
|                             | Ethiopia                 | 49,279                                                    | 54,110  | 12,733             | 14,680 | 10,469                       | 10,204 | 6,093   | 5,892  | 6,268                                         | 8,659  | 5,581                       | 5,085  | 2,029                     | 2,560  | 1,748    | 1,782  | 820          | 896    | 398                         | 637   | 408                        | 393   | 1,994                                         | 2,457 | 365                          | 496   | 302                                   | 286   | 49        | 58   | 22                      | 23   |
|                             | Gambia                   | 34,898                                                    | 37,630  | 7,527              | 8,543  | 7,452                        | 7,941  | 4,023   | 3,424  | 6,048                                         | 7,329  | 3,282                       | 2,952  | 1,377                     | 1,714  | 944      | 911    | 625          | 745    | 682                         | 830   | 261                        | 235   | 2,101                                         | 2,448 | 111                          | 120   | 405                                   | 333   | 43        | 79   | 17                      | 27   |
|                             | Guinea                   | 111,814                                                   | 122,941 | 15,734             | 17,936 | 28,011                       | 31,495 | 33,575  | 34,027 | 6,885                                         | 8,646  | 13,141                      | 11,996 | 7,156                     | 9,923  | 758      | 743    | 2,008        | 2,570  | 1,228                       | 1,652 | 302                        | 264   | 2,039                                         | 2,419 | 175                          | 168   | 608                                   | 597   | 138       | 420  | 57                      | 84   |
|                             | Guinea-Bissau            | 73,111                                                    | 80,693  | 19,288             | 22,979 | 9,175                        | 9,025  | 9,978   | 10,286 | 6,126                                         | 7,868  | 19,012                      | 19,475 | 2,568                     | 3,096  | 806      | 799    | 859          | 972    | 798                         | 1,000 | 278                        | 248   | 3,494                                         | 4,152 | 144                          | 150   | 481                                   | 437   | 75        | 152  | 29                      | 54   |
|                             | Haiti                    | 53,989                                                    | 62,548  | 17,634             | 19,352 | 16,091                       | 20,625 | 275     | 280    | 3,053                                         | 3,901  | 5,119                       | 4,052  | 4,280                     | 5,627  | 1,641    | 1,436  | 887          | 816    | 261                         | 265   | 326                        | 470   | 3,745                                         | 4,706 | 241                          | 347   | 198                                   | 492   | 84        | 73   | 153                     | 107  |
|                             | Liberia                  | 75,650                                                    | 77,901  | 18,165             | 23,912 | 8,278                        | 7,403  | 28,987  | 23,777 | 5,082                                         | 6,182  | 4,514                       | 4,440  | 1,802                     | 1,931  | 340      | 322    | 607          | 589    | 529                         | 701   | 248                        | 227   | 6,578                                         | 7,808 | 143                          | 151   | 311                                   | 285   | 51        | 146  | 15                      | 27   |
|                             | Madagascar               | 65,186                                                    | 68,856  | 23,038             | 26,707 | 13,144                       | 12,537 | 7,408   | 5,635  | 3,622                                         | 4,739  | 6,612                       | 6,642  | 1,465                     | 1,511  | 432      | 430    | 1,048        | 1,107  | 141                         | 169   | 312                        | 268   | 5,126                                         | 6,230 | 255                          | 377   | 2,530                                 | 2,458 | 29        | 19   | 25                      | 27   |
|                             | Malawi                   | 58,045                                                    | 63,332  | 10,126             | 12,882 | 13,193                       | 14,707 | 14,980  | 12,529 | 4,293                                         | 5,984  | 3,449                       | 3,141  | 2,760                     | 3,445  | 2,714    | 2,796  | 1,312        | 1,451  | 216                         | 233   | 333                        | 293   | 3,950                                         | 4,995 | 334                          | 474   | 307                                   | 307   | 55        | 74   | 25                      | 21   |
|                             | Mali                     | 116,761                                                   | 131,165 | 16,973             | 28,125 | 29,092                       | 21,647 | 30,194  | 30,700 | 13,698                                        | 14,679 | 11,451                      | 11,886 | 5,066                     | 13,046 | 728      | 697    | 2,607        | 2,026  | 1,219                       | 1,892 | 366                        | 324   | 4,276                                         | 4,735 | 189                          | 199   | 707                                   | 917   | 143       | 186  | 52                      | 112  |
|                             | Mozambique               | 75,077                                                    | 79,559  | 8,922              | 8,974  | 13,299                       | 12,187 | 15,582  | 16,148 | 7,351                                         | 10,761 | 3,582                       | 3,489  | 2,277                     | 2,218  | 16,407   | 16,906 | 2,267        | 2,415  | 246                         | 291   | 456                        | 323   | 3,712                                         | 4,738 | 425                          | 646   | 478                                   | 378   | 59        | 75   | 13                      | 10   |
|                             | Nepal                    | 24,280                                                    | 23,631  | 3,115              | 2,845  | 10,464                       | 9,869  | 2       | 3      | 3,673                                         | 3,590  | 3,675                       | 3,680  | 823                       | 860    | 233      | 235    | 288          | 246    | 240                         | 318   | 159                        | 201   | 1,115                                         | 1,295 | 193                          | 198   | 76                                    | 93    | 214       | 182  | 10                      | 16   |
|                             | Niger                    | 154,485                                                   | 158,057 | 45,070             | 48,731 | 31,185                       | 31,487 | 32,390  | 27,839 | 7,512                                         | 8,704  | 23,296                      | 22,589 | 9,891                     | 12,844 | 137      | 134    | 2,256        | 2,448  | 1,149                       | 1,723 | 304                        | 263   | 311                                           | 363   | 243                          | 199   | 537                                   | 498   | 129       | 114  | 74                      | 122  |
|                             | Pakistan                 | 41,707                                                    | 37,236  | 11,414             | 10,148 | 15,170                       | 11,852 | 115     | 218    | 3,739                                         | 3,099  | 3,238                       | 2,834  | 2,697                     | 4,284  | 180      | 179    | 2,013        | 1,008  | 273                         | 363   | 186                        | 218   | 1,383                                         | 1,323 | 195                          | 199   | 627                                   | 1,078 | 385       | 368  | 92                      | 65   |
|                             | Papua New Guinea         | 58,413                                                    | 60,822  | 8,776              | 9,417  | 28,137                       | 30,060 | 1,070   | 631    | 1,489                                         | 2,256  | 7,255                       | 6,583  | 2,923                     | 2,614  | 1,272    | 1,299  | 799          | 719    | 317                         | 246   | 339                        | 397   | 5,042                                         | 5,586 | 151                          | 157   | 291                                   | 606   | 104       | 33   | 448                     | 217  |
|                             | Rwanda                   | 42,967                                                    | 46,282  | 8,080              | 8,700  | 10,653                       | 11,442 | 11,410  | 10,990 | 4,808                                         | 6,289  | 2,803                       | 2,152  | 1,822                     | 2,155  | 589      | 574    | 788          | 957    | 177                         | 248   | 374                        | 324   | 1,291                                         | 1,605 | 295                          | 414   | 349                                   | 349   | 56        | 65   | 22                      | 19   |
|                             | Senegal                  | 47,245                                                    | 48,869  | 12,996             | 14,885 | 9,488                        | 9,846  | 8,941   | 7,440  | 6,297                                         | 6,965  | 4,767                       | 4,520  | 1,789                     | 2,052  | 233      | 224    | 529          | 600    | 691                         | 805   | 265                        | 236   | 625                                           | 740   | 139                          | 151   | 439                                   | 357   | 29        | 25   | 17                      | 25   |
|                             | Sierra Leone             | 116,163                                                   | 122,852 | 15,042             | 14,208 | 27,763                       | 32,236 | 47,380  | 45,450 | 7,494                                         | 9,535  | 5,218                       | 4,936  | 6,157                     | 7,651  | 311      | 288    | 2,635        | 3,029  | 1,111                       | 1,725 | 355                        | 295   | 1,621                                         | 2,064 | 152                          | 172   | 681                                   | 749   | 191       | 415  | 53                      | 98   |
|                             | Solomon Islands          | 27,535                                                    | 29,843  | 3,798              | 4,867  | 8,013                        | 8,849  | 129     | 83     | 485                                           | 852    | 2,087                       | 1,926  | 413                       | 360    | 375      | 379    | 38           | 55     | 2,369                       | 1,499 | 314                        | 340   | 8,975                                         | 9,958 | 145                          | 150   | 323                                   | 378   | 29        | 15   | 42                      | 134  |
|                             | Somalia                  | 112,462                                                   | 122,765 | 19,716             | 26,594 | 29,039                       | 37,472 | 6,607   | 4,915  | 7,860                                         | 8,860  | 31,058                      | 27,256 | 5,819                     | 5,768  | 849      | 835    | 5,564        | 4,361  | 510                         | 777   | 400                        | 311   | 2,732                                         | 3,043 | 1,371                        | 1,548 | 715                                   | 654   | 160       | 314  | 64                      | 58   |
|                             | South Sudan              | 109,435                                                   | 119,540 | 21,169             | 20,705 | 27,058                       | 35,014 | 25,506  | 21,463 | 6,080                                         | 8,151  | 9,270                       | 8,054  | 6,737                     | 9,632  | 1,092    | 1,063  | 3,235        | 3,906  | 1,707                       | 2,876 | 407                        | 328   | 5,756                                         | 6,617 | 571                          | 789   | 667                                   | 697   | 120       | 197  | 58                      | 45   |
| Togo                        | 72,126                   | 79,381                                                    | 31,311  | 41,106             | 10,692 | 11,152                       | 17,140 | 13,445  | 4,986  | 5,933                                         | 2,862  | 2,007                       | 1,523  | 1,524                     | 966    | 872      | 973    | 885          | 592    | 769                         | 244   | 225                        | 778   | 888                                           | 142   | 146                          | 352   | 317                                   | 47    | 79        | 19   | 33                      |      |
| Uganda                      | 61,240                   | 68,040                                                    | 5,666   | 6,817              | 8,166  | 8,901                        | 21,702 | 22,048  | 4,817  | 6,415                                         | 7,496  | 7,666                       | 2,330  | 3,135                     | 2,249  | 2,168    | 973    | 1,284        | 173    | 248                         | 333   | 297                        | 6,637 | 8,213                                         | 285   | 413                          | 350   | 373                                   | 43    | 43        | 19   | 20                      |      |
| United Republic of Tanzania | 55,404                   | 54,794                                                    | 4,212   | 4,438              | 16,742 | 15,303                       | 13,049 | 12,274  | 5,473  | 7,225                                         | 6,333  | 5,576                       | 1,750  | 1,505                     | 1,281  | 1,243    | 1,570  | 1,544        | 293    | 347                         | 507   | 387                        | 3,227 | 3,950                                         | 370   | 477                          | 490   | 431                                   | 70    | 65        | 36   | 28                      |      |
| Yemen                       | 24,203                   | 25,176                                                    | 10,700  | 14,134             | 6,666  | 4,923                        | 160    | 163     | 862    | 906                                           | 3,017  | 2,298                       | 628    | 461                       | 168    | 169      | 145    | 121          | 399    | 378                         | 138   | 140                        | 749   | 827                                           | 175   | 186                          | 324   | 317                                   | 102   | 114       | 71   | 40                      |      |

Under 5 years, DALYs/100,000, for males and females, 2019

|                             | Total communicable |         | Enteric infections |        | Lower respiratory infections |        | Malaria |        | Neonatal sepsis and other neonatal infections |        | Vaccine Preventable disease |       | Meningitis & Encephalitis |       | HIV/AIDS |        | Tuberculosis |       | Neglected Tropical diseases |       | Infectious skin conditions |      | Sexually transmitted infections excluding HIV |       | Upper respiratory infections |      | Other unspecified infectious diseases |      | Hepatitis |      | Rheumatic heart disease |      |
|-----------------------------|--------------------|---------|--------------------|--------|------------------------------|--------|---------|--------|-----------------------------------------------|--------|-----------------------------|-------|---------------------------|-------|----------|--------|--------------|-------|-----------------------------|-------|----------------------------|------|-----------------------------------------------|-------|------------------------------|------|---------------------------------------|------|-----------|------|-------------------------|------|
|                             | Female             | Male    | Female             | Male   | Female                       | Male   | Female  | Male   | Female                                        | Male   | Female                      | Male  | Female                    | Male  | Female   | Male   | Female       | Male  | Female                      | Male  | Female                     | Male | Female                                        | Male  | Female                       | Male | Female                                | Male | Female    | Male | Female                  | Male |
|                             |                    |         |                    |        |                              |        |         |        |                                               |        |                             |       |                           |       |          |        |              |       |                             |       |                            |      |                                               |       |                              |      |                                       |      |           |      |                         |      |
| Angola                      | 52,739             | 59,428  | 11,029             | 15,425 | 9,691                        | 9,375  | 10,363  | 10,589 | 3,687                                         | 4,593  | 7,261                       | 7,059 | 2,095                     | 1,794 | 1,423    | 1,453  | 2,474        | 2,943 | 233                         | 342   | 299                        | 265  | 3,408                                         | 4,551 | 284                          | 375  | 440                                   | 583  | 35        | 60   | 16                      | 21   |
| Bangladesh                  | 19,366             | 18,235  | 2,825              | 2,644  | 9,174                        | 6,706  | 1       | 1      | 3,161                                         | 5,103  | 1,950                       | 1,271 | 274                       | 140   | 24       | 24     | 324          | 272   | 241                         | 221   | 192                        | 246  | 1,132                                         | 1,268 | 205                          | 210  | 102                                   | 93   | 150       | 30   | 11                      | 4    |
| Belize                      | 6,950              | 8,738   | 1,035              | 1,386  | 2,434                        | 3,214  | 1       | 1      | 2,208                                         | 2,710  | 42                          | 55    | 316                       | 347   | 267      | 319    | 44           | 82    | 95                          | 95    | 253                        | 260  | 5                                             | 0     | 170                          | 192  | 71                                    | 67   | 6         | 6    | 5                       | 5    |
| Bhutan                      | 19,213             | 18,517  | 3,348              | 2,315  | 6,111                        | 7,170  | 4       | 5      | 2,535                                         | 1,978  | 416                         | 285   | 1,781                     | 1,689 | 408      | 414    | 489          | 267   | 419                         | 427   | 246                        | 236  | 2,555                                         | 2,909 | 226                          | 223  | 331                                   | 294  | 296       | 269  | 49                      | 35   |
| Bolivia                     | 20,634             | 23,961  | 2,246              | 2,016  | 9,815                        | 9,574  | 3       | 3      | 4,591                                         | 7,290  | 1,324                       | 1,082 | 548                       | 629   | 814      | 815    | 364          | 395   | 158                         | 170   | 256                        | 254  | 1,132                                         | 1,327 | 226                          | 228  | 137                                   | 155  | 11        | 14   | 11                      | 10   |
| Cabo Verde                  | 11,180             | 10,762  | 2,009              | 1,989  | 2,472                        | 2,407  | 840     | 921    | 2,831                                         | 2,582  | 403                         | 358   | 458                       | 465   | 597      | 520    | 182          | 114   | 391                         | 393   | 219                        | 203  | 463                                           | 548   | 122                          | 128  | 175                                   | 105  | 12        | 13   | 5                       | 8    |
| Cambodia                    | 22,919             | 29,653  | 1,771              | 2,656  | 14,565                       | 18,751 | 86      | 46     | 2,532                                         | 3,574  | 1,500                       | 1,421 | 661                       | 913   | 288      | 291    | 539          | 627   | 187                         | 219   | 300                        | 309  | 67                                            | 78    | 156                          | 171  | 209                                   | 426  | 47        | 31   | 11                      | 40   |
| Cameroon                    | 85,898             | 93,325  | 25,151             | 35,357 | 16,366                       | 16,178 | 23,067  | 18,174 | 5,136                                         | 6,531  | 7,121                       | 6,833 | 2,389                     | 2,744 | 1,519    | 1,490  | 1,115        | 1,168 | 578                         | 824   | 254                        | 237  | 2,583                                         | 3,016 | 153                          | 160  | 391                                   | 369  | 55        | 209  | 18                      | 36   |
| Comoros                     | 43,925             | 41,256  | 7,894              | 11,543 | 16,382                       | 11,325 | 1,978   | 1,438  | 4,426                                         | 5,257  | 7,188                       | 5,869 | 2,364                     | 1,998 | 9        | 11     | 811          | 690   | 150                         | 158   | 359                        | 298  | 1,672                                         | 1,961 | 255                          | 319  | 380                                   | 346  | 40        | 32   | 16                      | 11   |
| Congo                       | 37,396             | 47,752  | 7,307              | 16,533 | 3,760                        | 4,692  | 10,067  | 9,081  | 3,340                                         | 3,822  | 4,448                       | 4,173 | 794                       | 760   | 3,969    | 4,173  | 818          | 1,071 | 131                         | 164   | 258                        | 255  | 2,002                                         | 2,439 | 211                          | 240  | 260                                   | 311  | 22        | 25   | 9                       | 11   |
| Dem. People's Rep. of Korea | 6,346              | 7,171   | 1,105              | 1,343  | 2,829                        | 3,188  | 1       | 1      | 367                                           | 479    | 356                         | 343   | 520                       | 562   | 220      | 223    | 134          | 157   | 41                          | 43    | 273                        | 294  | 213                                           | 245   | 147                          | 155  | 107                                   | 106  | 21        | 22   | 10                      | 10   |
| Djibouti                    | 40,509             | 41,795  | 6,025              | 8,175  | 13,124                       | 13,695 | 912     | 642    | 4,960                                         | 5,646  | 8,110                       | 6,177 | 2,464                     | 2,193 | 624      | 611    | 1,008        | 1,065 | 370                         | 560   | 380                        | 312  | 1,667                                         | 1,791 | 321                          | 419  | 468                                   | 428  | 51        | 52   | 26                      | 20   |
| Dominican Republic          | 15,684             | 19,529  | 2,412              | 2,340  | 1,984                        | 2,485  | 0       | 0      | 6,755                                         | 9,494  | 1,622                       | 1,577 | 790                       | 1,142 | 115      | 122    | 1,233        | 184   | 78                          | 80    | 233                        | 240  | 1,330                                         | 1,589 | 159                          | 164  | 61                                    | 68   | 11        | 29   | 10                      | 15   |
| El Salvador                 | 6,519              | 7,572   | 1,194              | 1,385  | 1,719                        | 2,017  | 0       | 0      | 1,172                                         | 1,635  | 611                         | 559   | 123                       | 158   | 1,033    | 1,099  | 12           | 15    | 104                         | 94    | 209                        | 213  | 119                                           | 140   | 165                          | 173  | 49                                    | 70   | 6         | 8    | 3                       | 5    |
| Eswatini                    | 49,357             | 55,561  | 13,185             | 12,394 | 12,709                       | 16,853 | 240     | 254    | 3,869                                         | 4,595  | 2,525                       | 2,416 | 1,018                     | 1,404 | 9,917    | 10,104 | 2,715        | 3,769 | 117                         | 144   | 209                        | 215  | 2,143                                         | 2,555 | 184                          | 212  | 477                                   | 587  | 36        | 46   | 12                      | 14   |
| Ghana                       | 53,595             | 60,446  | 7,399              | 8,706  | 7,690                        | 8,243  | 21,771  | 23,360 | 8,257                                         | 10,440 | 2,729                       | 2,743 | 1,746                     | 2,336 | 623      | 587    | 701          | 924   | 529                         | 784   | 246                        | 220  | 1,496                                         | 1,772 | 124                          | 135  | 224                                   | 157  | 46        | 20   | 14                      | 21   |
| Guatemala                   | 17,743             | 21,265  | 4,357              | 4,850  | 9,499                        | 11,658 | 3       | 3      | 2,307                                         | 3,032  | 186                         | 227   | 344                       | 366   | 188      | 194    | 69           | 83    | 194                         | 209   | 235                        | 238  | 2                                             | 1     | 187                          | 199  | 152                                   | 182  | 14        | 16   | 5                       | 6    |
| Honduras                    | 10,157             | 13,582  | 3,405              | 4,680  | 1,560                        | 2,181  | 2       | 3      | 2,175                                         | 3,489  | 774                         | 807   | 447                       | 703   | 48       | 48     | 40           | 55    | 877                         | 687   | 216                        | 225  | 148                                           | 199   | 191                          | 222  | 249                                   | 246  | 23        | 34   | 3                       | 3    |
| India                       | 27,151             | 21,584  | 5,934              | 4,047  | 10,945                       | 8,568  | 826     | 654    | 3,002                                         | 2,710  | 2,089                       | 1,755 | 1,488                     | 1,157 | 144      | 135    | 438          | 356   | 332                         | 322   | 375                        | 293  | 504                                           | 523   | 173                          | 178  | 275                                   | 218  | 598       | 647  | 27                      | 20   |
| Kenya                       | 41,441             | 44,853  | 10,808             | 15,013 | 8,855                        | 8,491  | 6,867   | 5,993  | 4,446                                         | 4,892  | 3,208                       | 2,636 | 1,308                     | 1,311 | 3,342    | 3,636  | 463          | 441   | 132                         | 197   | 337                        | 261  | 1,143                                         | 1,340 | 264                          | 296  | 212                                   | 292  | 47        | 47   | 10                      | 8    |
| Kiribati                    | 22,535             | 23,450  | 4,613              | 5,733  | 4,295                        | 4,161  | 0       | 0      | 1,002                                         | 1,725  | 5,846                       | 5,211 | 1,912                     | 1,488 | 277      | 279    | 525          | 549   | 255                         | 222   | 326                        | 354  | 2,811                                         | 3,165 | 163                          | 147  | 320                                   | 301  | 59        | 34   | 129                     | 82   |
| Kyrgyzstan                  | 7,358              | 8,740   | 980                | 1,163  | 4,302                        | 5,233  | 0       | 0      | 676                                           | 779    | 18                          | 17    | 368                       | 419   | 105      | 157    | 200          | 184   | 108                         | 118   | 136                        | 137  | 1                                             | 5     | 297                          | 343  | 119                                   | 117  | 43        | 63   | 4                       | 4    |
| Lao PDR                     | 31,070             | 37,576  | 4,928              | 4,744  | 14,323                       | 18,992 | 42      | 41     | 3,627                                         | 5,340  | 4,590                       | 4,200 | 1,084                     | 1,468 | 407      | 410    | 891          | 1,087 | 196                         | 202   | 306                        | 317  | 327                                           | 380   | 179                          | 196  | 127                                   | 143  | 20        | 32   | 22                      | 22   |
| Lesotho                     | 61,047             | 72,355  | 13,579             | 16,403 | 19,352                       | 23,196 | 0       | 0      | 4,217                                         | 5,732  | 1,635                       | 1,663 | 906                       | 1,376 | 14,067   | 14,156 | 3,928        | 5,666 | 123                         | 130   | 205                        | 211  | 2,318                                         | 2,899 | 191                          | 225  | 458                                   | 629  | 54        | 63   | 15                      | 16   |
| Maldives                    | 4,964              | 6,658   | 918                | 1,140  | 823                          | 858    | 0       | 0      | 1,065                                         | 2,105  | 735                         | 671   | 230                       | 306   | 11       | 10     | 49           | 58    | 445                         | 825   | 294                        | 300  | 118                                           | 135   | 157                          | 172  | 103                                   | 66   | 6         | 4    | 9                       | 9    |
| Marshall Islands            | 14,803             | 16,365  | 1,254              | 1,555  | 5,269                        | 6,022  | 0       | 0      | 744                                           | 1,240  | 3,792                       | 3,477 | 374                       | 341   | 292      | 299    | 119          | 120   | 200                         | 175   | 314                        | 340  | 2,065                                         | 2,460 | 140                          | 144  | 136                                   | 142  | 11        | 8    | 94                      | 41   |
| Mauritania                  | 41,985             | 44,485  | 13,334             | 15,963 | 7,989                        | 7,573  | 8,664   | 7,544  | 4,775                                         | 5,729  | 2,634                       | 2,468 | 925                       | 1,026 | 6        | 8      | 267          | 272   | 375                         | 463   | 222                        | 214  | 2,323                                         | 2,744 | 124                          | 131  | 316                                   | 305  | 25        | 33   | 7                       | 13   |
| Micronesia (Fed States of)  | 11,549             | 12,862  | 1,039              | 1,384  | 3,225                        | 3,453  | 0       | 0      | 591                                           | 992    | 2,088                       | 1,956 | 234                       | 216   | 1,383    | 1,526  | 58           | 65    | 151                         | 141   | 307                        | 328  | 2,168                                         | 2,508 | 140                          | 144  | 107                                   | 111  | 6         | 4    | 52                      | 33   |
| Mongolia                    | 12,138             | 12,346  | 1,550              | 958    | 6,530                        | 6,273  | 0       | 0      | 584                                           | 1,132  | 559                         | 468   | 427                       | 876   | 10       | 10     | 337          | 233   | 42                          | 46    | 152                        | 163  | 1,629                                         | 1,950 | 128                          | 132  | 117                                   | 49   | 69        | 51   | 3                       | 4    |
| Morocco                     | 9,361              | 10,053  | 2,946              | 3,279  | 2,620                        | 2,904  | 0       | 0      | 474                                           | 569    | 1,518                       | 1,393 | 365                       | 475   | 215      | 214    | 160          | 39    | 80                          | 81    | 139                        | 143  | 556                                           | 661   | 161                          | 177  | 83                                    | 74   | 23        | 35   | 21                      | 10   |
| Myanmar                     | 27,699             | 31,602  | 3,021              | 4,630  | 11,138                       | 12,113 | 167     | 42     | 3,855                                         | 5,365  | 3,950                       | 3,574 | 2,015                     | 1,792 | 185      | 192    | 756          | 1,019 | 655                         | 551   | 311                        | 322  | 843                                           | 903   | 179                          | 196  | 607                                   | 775  | 7         | 41   | 10                      | 86   |
| Nicaragua                   | 8,893              | 11,443  | 1,412              | 1,635  | 3,720                        | 5,061  | 6       | 6      | 2,106                                         | 2,944  | 78                          | 69    | 350                       | 445   | 476      | 490    | 47           | 65    | 143                         | 125   | 237                        | 249  | 114                                           | 134   | 148                          | 155  | 38                                    | 40   | 14        | 28   | 5                       | 6    |
| Nigeria                     | 126,504            | 139,698 | 39,092             | 44,499 | 31,755                       | 36,036 | 25,099  | 25,312 | 6,203                                         | 8,309  | 8,504                       | 7,360 | 7,921                     | 9,406 | 1,663    | 1,658  | 1,843        | 2,022 | 1,094                       | 1,380 | 335                        | 307  | 2,116                                         | 2,496 | 175                          | 172  | 552                                   | 533  | 104       | 131  | 47                      | 75   |
| Palestine                   | 4,115              | 4,399   | 555                | 661    | 638                          | 780    | 0       | 0      | 1,861                                         | 1,877  | 293                         | 265   | 185                       | 203   | 31       | 31     | 15           | 7     | 45                          | 42    | 139                        | 141  | 141                                           | 160   | 154                          | 166  | 44                                    | 50   | 11        | 13   | 5                       | 4    |
| Sao Tome and Principe       | 21,020             | 21,256  | 2,415              | 2,527  | 6,058                        | 4,939  | 2,672   | 3,201  | 3,806                                         | 4,663  | 1,707                       | 1,594 | 1,182                     | 405   | 5        | 7      | 143          | 122   | 1,115                       | 1,327 | 256                        | 225  | 1,122                                         | 1,233 | 127                          | 129  | 377                                   | 806  | 22        | 49   | 11                      | 30   |
| Sudan                       | 21,299             | 24,114  | 7,215              | 11,295 | 4,235                        | 5,034  | 2,942   | 314    | 864                                           | 981    | 2,641                       | 2,442 | 621                       | 747   | 186      | 182    | 109          | 181   | 240                         | 394   | 139                        | 143  | 1,479                                         | 1,705 | 153                          | 167  | 175                                   | 214  | 213       | 245  | 87                      | 69   |
| Tajikistan                  | 20,417             | 26,194  | 5,022              | 5,072  | 11,817                       | 16,724 | 0       | 0      | 806                                           | 1,386  | 1,210                       | 1,073 | 446                       | 468   | 11       | 10     | 428          | 682   | 59                          | 74    | 122                        | 127  | 90                                            | 107   | 267                          | 261  | 46                                    | 53   | 87        | 152  | 4                       | 5    |
| Timor-Leste                 | 26,674             | 29,169  | 4,139              | 4,456  | 10,794                       | 11,422 | 2       | 2      | 2,978                                         | 4,451  | 3,223                       | 2,869 | 1,221                     | 1,433 | 2,233    | 2,272  | 643          | 690   | 226                         | 238   | 323                        | 332  | 552                                           | 649   | 164                          | 176  | 133                                   | 133  | 19        | 20   | 24                      | 26   |
| Tuvalu                      | 10,975             | 11,287  | 919                | 965    | 3,368                        | 3,269  | 0       | 0      | 648                                           | 1,142  | 2,744                       | 2,409 | 322                       | 268   | 240      | 239    | 52           | 43    | 139                         | 120   | 307                        | 329  | 1,930                                         | 2,235 | 139                          | 143  | 103                                   | 102  | 7         | 5    | 57                      | 18   |
| Vanuatu                     | 20,157             | 21,477  | 2,845              | 3,519  | 6,819                        | 6,876  | 12      | 11     | 778                                           | 1,363  | 4,033                       | 3,657 | 529                       | 465   | 335      | 338    | 162          | 153   | 157                         | 152   | 302                        | 328  | 3,769                                         | 4,278 | 141                          | 145  | 110                                   | 120  | 25        | 12   | 120                     | 59   |
| Venezuela                   | 8,250              | 9,930   | 1,504              | 1,794  | 2,220                        | 2,951  | 394     | 169    | 2,935                                         | 3,667  | 130                         | 146   | 329                       | 399   | 85       | 91     | 38           | 34    | 138                         | 166   | 202                        | 207  | 35                                            | 33    | 162                          | 170  | 71                                    | 94   | 5</       |      |                         |      |

Under 5 years, DALYs/100,000, for males and females, 2019

|                             | Total communicable |        | Enteric infections |       | Lower respiratory infections |        | Malaria |        | Neonatal sepsis and other neonatal infections |       | Vaccine Preventable disease |       | Meningitis & Encephalitis |       | HIV/AIDS |       | Tuberculosis |       | Neglected Tropical diseases |       | Infectious skin conditions |      | Sexually transmitted infections excluding HIV |       | Upper respiratory infections |      | Other unspecified infectious diseases |      | Hepatitis |      | Rheumatic heart disease |      |
|-----------------------------|--------------------|--------|--------------------|-------|------------------------------|--------|---------|--------|-----------------------------------------------|-------|-----------------------------|-------|---------------------------|-------|----------|-------|--------------|-------|-----------------------------|-------|----------------------------|------|-----------------------------------------------|-------|------------------------------|------|---------------------------------------|------|-----------|------|-------------------------|------|
|                             | Female             | Male   | Female             | Male  | Female                       | Male   | Female  | Male   | Female                                        | Male  | Female                      | Male  | Female                    | Male  | Female   | Male  | Female       | Male  | Female                      | Male  | Female                     | Male | Female                                        | Male  | Female                       | Male | Female                                | Male | Female    | Male | Female                  | Male |
|                             |                    |        |                    |       |                              |        |         |        |                                               |       |                             |       |                           |       |          |       |              |       |                             |       |                            |      |                                               |       |                              |      |                                       |      |           |      |                         |      |
| Albania                     | 5,402              | 5,269  | 311                | 372   | 3,662                        | 3,384  | 0       | 0      | 46                                            | 73    | 270                         | 213   | 374                       | 402   | 6        | 6     | 8            | 5     | 44                          | 53    | 151                        | 154  | 112                                           | 144   | 216                          | 302  | 161                                   | 138  | 5         | 7    | 35                      | 16   |
| Algeria                     | 4,772              | 4,976  | 883                | 933   | 1,565                        | 1,601  | 0       | 0      | 667                                           | 864   | 748                         | 633   | 207                       | 195   | 38       | 38    | 18           | 21    | 59                          | 61    | 138                        | 141  | 157                                           | 176   | 153                          | 165  | 105                                   | 108  | 19        | 30   | 14                      | 9    |
| Armenia                     | 6,577              | 8,817  | 485                | 543   | 3,261                        | 5,001  | 0       | 0      | 2,239                                         | 2,527 | 15                          | 14    | 122                       | 203   | 12       | 6     | 58           | 80    | 70                          | 92    | 125                        | 130  | 0                                             | 0     | 115                          | 126  | 66                                    | 80   | 4         | 13   | 3                       | 3    |
| Azerbaijan                  | 22,076             | 19,247 | 1,462              | 1,049 | 16,290                       | 14,396 | 0       | 0      | 953                                           | 1,089 | 1,017                       | 879   | 1,311                     | 798   | 18       | 19    | 286          | 255   | 42                          | 55    | 125                        | 130  | 194                                           | 207   | 256                          | 253  | 84                                    | 80   | 34        | 44   | 3                       | 3    |
| Botswana                    | 30,774             | 32,911 | 7,538              | 7,640 | 10,584                       | 10,761 | 199     | 220    | 2,841                                         | 3,962 | 2,205                       | 1,897 | 952                       | 1,176 | 1,120    | 1,169 | 1,904        | 2,039 | 117                         | 126   | 185                        | 190  | 2,519                                         | 2,984 | 181                          | 202  | 377                                   | 488  | 32        | 39   | 21                      | 19   |
| Brazil                      | 7,948              | 10,257 | 1,180              | 1,494 | 2,445                        | 3,106  | 13      | 7      | 2,606                                         | 3,699 | 118                         | 120   | 344                       | 457   | 137      | 171   | 55           | 61    | 201                         | 251   | 360                        | 356  | 105                                           | 118   | 230                          | 252  | 136                                   | 146  | 10        | 15   | 7                       | 6    |
| China                       | 3,320              | 3,774  | 329                | 354   | 1,453                        | 1,731  | 0       | 0      | 318                                           | 368   | 157                         | 143   | 257                       | 309   | 63       | 63    | 42           | 46    | 27                          | 27    | 261                        | 286  | 186                                           | 201   | 138                          | 151  | 71                                    | 74   | 14        | 16   | 5                       | 5    |
| Colombia                    | 6,516              | 7,535  | 823                | 835   | 2,215                        | 2,345  | 36      | 19     | 1,961                                         | 2,788 | 90                          | 97    | 342                       | 360   | 70       | 86    | 41           | 40    | 320                         | 284   | 245                        | 241  | 27                                            | 39    | 205                          | 216  | 132                                   | 174  | 6         | 9    | 2                       | 2    |
| Costa Rica                  | 2,239              | 2,639  | 456                | 518   | 632                          | 846    | 0       | 0      | 367                                           | 367   | 15                          | 15    | 183                       | 212   | 65       | 86    | 6            | 8     | 53                          | 56    | 208                        | 215  | 7                                             | 20    | 161                          | 171  | 78                                    | 116  | 4         | 5    | 4                       | 4    |
| Cuba                        | 2,430              | 2,683  | 341                | 400   | 682                          | 824    | 0       | 0      | 569                                           | 556   | 17                          | 21    | 250                       | 262   | 18       | 34    | 3            | 3     | 49                          | 52    | 257                        | 270  | 0                                             | 0     | 175                          | 176  | 62                                    | 79   | 3         | 3    | 4                       | 4    |
| Ecuador                     | 8,333              | 9,453  | 838                | 831   | 2,899                        | 3,632  | 1       | 1      | 1,767                                         | 2,090 | 1,029                       | 864   | 270                       | 323   | 120      | 126   | 46           | 72    | 67                          | 68    | 250                        | 253  | 788                                           | 939   | 202                          | 197  | 45                                    | 45   | 4         | 6    | 6                       | 5    |
| Egypt                       | 13,891             | 13,591 | 7,141              | 6,378 | 5,037                        | 5,160  | 0       | 0      | 365                                           | 505   | 361                         | 363   | 441                       | 564   | 4        | 4     | 5            | 9     | 42                          | 53    | 148                        | 152  | 89                                            | 105   | 117                          | 133  | 82                                    | 80   | 25        | 53   | 35                      | 31   |
| Equatorial Guinea           | 42,337             | 46,079 | 1,991              | 3,040 | 3,336                        | 3,654  | 16,929  | 16,556 | 2,739                                         | 3,253 | 2,917                       | 3,405 | 832                       | 931   | 6,014    | 5,710 | 409          | 555   | 127                         | 143   | 240                        | 245  | 6,339                                         | 8,006 | 204                          | 228  | 247                                   | 331  | 8         | 16   | 5                       | 7    |
| Fiji                        | 12,423             | 14,462 | 2,314              | 3,490 | 4,296                        | 4,703  | 0       | 0      | 1,466                                         | 1,825 | 1,544                       | 1,321 | 453                       | 579   | 131      | 133   | 70           | 79    | 193                         | 161   | 340                        | 352  | 1,090                                         | 1,223 | 137                          | 140  | 277                                   | 368  | 8         | 5    | 105                     | 82   |
| Gabon                       | 26,199             | 33,605 | 2,794              | 6,073 | 2,716                        | 4,137  | 10,316  | 10,234 | 2,843                                         | 3,603 | 2,068                       | 2,754 | 716                       | 965   | 2,058    | 1,926 | 329          | 708   | 140                         | 230   | 260                        | 266  | 1,514                                         | 2,094 | 212                          | 250  | 217                                   | 336  | 10        | 20   | 6                       | 9    |
| Grenada                     | 6,592              | 7,158  | 620                | 591   | 2,847                        | 2,721  | 0       | 0      | 2,039                                         | 2,721 | 43                          | 29    | 254                       | 179   | 43       | 74    | 11           | 10    | 149                         | 123   | 324                        | 372  | 1                                             | 6     | 167                          | 179  | 83                                    | 141  | 5         | 5    | 6                       | 5    |
| Guyana                      | 10,169             | 13,318 | 2,104              | 2,534 | 2,884                        | 3,612  | 277     | 133    | 3,158                                         | 5,374 | 36                          | 21    | 467                       | 449   | 419      | 321   | 83           | 108   | 199                         | 174   | 251                        | 249  | 20                                            | 26    | 179                          | 174  | 76                                    | 128  | 9         | 10   | 7                       | 6    |
| Indonesia                   | 17,329             | 21,335 | 4,286              | 4,744 | 3,880                        | 4,488  | 33      | 20     | 1,891                                         | 3,157 | 1,951                       | 1,952 | 952                       | 1,746 | 400      | 447   | 545          | 608   | 1,436                       | 1,721 | 331                        | 321  | 1,315                                         | 1,856 | 186                          | 196  | 96                                    | 336  | 22        | 39   | 5                       | 3    |
| Iran (Islamic Republic of)  | 2,851              | 3,178  | 610                | 666   | 687                          | 769    | 1       | 1      | 521                                           | 678   | 178                         | 157   | 148                       | 153   | 179      | 172   | 11           | 13    | 38                          | 49    | 140                        | 144  | 68                                            | 79    | 162                          | 175  | 87                                    | 98   | 11        | 15   | 10                      | 9    |
| Iraq                        | 8,191              | 7,880  | 1,174              | 1,120 | 1,936                        | 1,915  | 0       | 0      | 2,320                                         | 2,288 | 1,439                       | 1,212 | 553                       | 545   | 44       | 44    | 44           | 37    | 79                          | 87    | 132                        | 136  | 196                                           | 220   | 154                          | 167  | 85                                    | 75   | 25        | 27   | 10                      | 7    |
| Jamaica                     | 5,675              | 6,177  | 520                | 545   | 879                          | 956    | 0       | 0      | 3,055                                         | 3,485 | 10                          | 11    | 302                       | 264   | 297      | 278   | 3            | 6     | 101                         | 105   | 234                        | 245  | 1                                             | 8     | 168                          | 164  | 94                                    | 103  | 2         | 3    | 8                       | 6    |
| Mexico                      | 6,345              | 7,766  | 997                | 1,055 | 2,092                        | 2,489  | 0       | 0      | 2,222                                         | 3,077 | 84                          | 78    | 232                       | 275   | 63       | 66    | 19           | 21    | 70                          | 76    | 224                        | 228  | 2                                             | 3     | 201                          | 223  | 99                                    | 127  | 35        | 44   | 4                       | 4    |
| Namibia                     | 32,540             | 33,604 | 6,785              | 5,805 | 7,421                        | 8,153  | 2,079   | 2,037  | 3,260                                         | 4,128 | 1,234                       | 1,059 | 621                       | 717   | 6,939    | 6,849 | 1,405        | 1,502 | 174                         | 161   | 193                        | 197  | 1,830                                         | 2,314 | 180                          | 198  | 390                                   | 456  | 20        | 19   | 9                       | 10   |
| Nauru                       | 15,469             | 15,720 | 1,243              | 1,300 | 8,606                        | 8,293  | 0       | 0      | 788                                           | 1,289 | 559                         | 505   | 820                       | 656   | 260      | 262   | 113          | 113   | 172                         | 147   | 317                        | 340  | 2,116                                         | 2,443 | 138                          | 143  | 129                                   | 149  | 10        | 7    | 198                     | 73   |
| Panama                      | 7,992              | 9,326  | 1,928              | 1,935 | 2,832                        | 3,607  | 2       | 2      | 1,776                                         | 2,227 | 37                          | 36    | 353                       | 392   | 164      | 183   | 237          | 184   | 64                          | 71    | 225                        | 227  | 13                                            | 10    | 212                          | 276  | 138                                   | 164  | 5         | 7    | 6                       | 7    |
| Paraguay                    | 9,974              | 10,621 | 1,260              | 1,101 | 2,111                        | 1,895  | 0       | 0      | 1,014                                         | 1,467 | 465                         | 413   | 338                       | 320   | 1,255    | 1,284 | 66           | 59    | 96                          | 117   | 332                        | 323  | 2,728                                         | 3,337 | 209                          | 222  | 93                                    | 77   | 2         | 3    | 3                       | 3    |
| Peru                        | 11,950             | 13,815 | 1,411              | 1,522 | 2,995                        | 3,329  | 9       | 9      | 3,479                                         | 4,797 | 939                         | 782   | 340                       | 460   | 1,628    | 1,618 | 98           | 100   | 62                          | 93    | 246                        | 249  | 483                                           | 565   | 190                          | 201  | 62                                    | 81   | 5         | 5    | 4                       | 4    |
| Philippines                 | 18,746             | 23,293 | 2,252              | 2,970 | 5,628                        | 7,671  | 8       | 4      | 4,177                                         | 5,252 | 2,963                       | 3,014 | 809                       | 1,155 | 454      | 470   | 458          | 640   | 690                         | 613   | 345                        | 363  | 735                                           | 806   | 177                          | 196  | 82                                    | 103  | 5         | 10   | 23                      | 26   |
| Saint Lucia                 | 5,607              | 5,137  | 751                | 768   | 1,388                        | 1,476  | 0       | 0      | 2,251                                         | 1,691 | 27                          | 56    | 399                       | 344   | 46       | 31    | 22           | 24    | 176                         | 106   | 275                        | 287  | 29                                            | 26    | 169                          | 191  | 64                                    | 127  | 3         | 3    | 7                       | 4    |
| Samoa                       | 9,311              | 11,006 | 760                | 919   | 2,028                        | 2,342  | 0       | 0      | 586                                           | 1,008 | 2,870                       | 3,305 | 188                       | 207   | 253      | 271   | 31           | 19    | 108                         | 99    | 303                        | 325  | 1,929                                         | 2,258 | 140                          | 143  | 86                                    | 87   | 5         | 4    | 24                      | 20   |
| South Africa                | 26,804             | 32,137 | 6,289              | 7,235 | 6,429                        | 7,261  | 59      | 75     | 2,724                                         | 3,874 | 2,316                       | 2,439 | 505                       | 705   | 2,969    | 3,645 | 1,073        | 1,281 | 41                          | 46    | 188                        | 191  | 3,378                                         | 4,367 | 187                          | 202  | 629                                   | 794  | 10        | 15   | 7                       | 8    |
| St Vincent & the Grenadines | 7,978              | 7,441  | 1,167              | 927   | 1,779                        | 1,855  | 0       | 0      | 3,741                                         | 3,070 | 33                          | 26    | 347                       | 458   | 198      | 196   | 16           | 31    | 118                         | 99    | 286                        | 321  | 1                                             | 58    | 190                          | 208  | 92                                    | 182  | 4         | 3    | 6                       | 7    |
| Suriname                    | 13,140             | 15,374 | 2,223              | 2,028 | 2,529                        | 3,147  | 10      | 7      | 4,667                                         | 6,115 | 393                         | 351   | 683                       | 856   | 426      | 325   | 24           | 39    | 412                         | 331   | 373                        | 458  | 1,071                                         | 1,284 | 169                          | 174  | 149                                   | 243  | 6         | 10   | 5                       | 5    |
| Syrian Arab Republic        | 5,861              | 6,118  | 729                | 728   | 2,012                        | 2,128  | 0       | 0      | 631                                           | 838   | 1,378                       | 1,180 | 432                       | 496   | 14       | 15    | 22           | 18    | 97                          | 109   | 137                        | 140  | 142                                           | 164   | 154                          | 170  | 59                                    | 65   | 8         | 16   | 47                      | 52   |
| Thailand                    | 4,921              | 5,902  | 683                | 801   | 859                          | 1,227  | 1       | 1      | 1,241                                         | 1,652 | 677                         | 632   | 175                       | 233   | 495      | 515   | 34           | 43    | 96                          | 98    | 294                        | 300  | 56                                            | 65    | 215                          | 226  | 88                                    | 97   | 3         | 4    | 6                       | 7    |
| Tokelau                     | 8,082              | 7,435  | 792                | 724   | 2,073                        | 1,493  | 0       | 0      | 527                                           | 936   | 2,195                       | 1,599 | 299                       | 148   | 252      | 257   | 27           | 15    | 131                         | 110   | 302                        | 317  | 1,184                                         | 1,605 | 137                          | 140  | 89                                    | 78   | 5         | 4    | 68                      | 8    |
| Tonga                       | 10,838             | 11,252 | 576                | 548   | 1,960                        | 2,804  | 0       | 0      | 1,665                                         | 1,577 | 2,547                       | 2,332 | 1,184                     | 1,279 | 103      | 104   | 43           | 51    | 520                         | 291   | 311                        | 329  | 1,421                                         | 1,521 | 139                          | 143  | 245                                   | 206  | 88        | 46   | 36                      | 23   |
| Tunisia                     | 2,973              | 3,778  | 494                | 524   | 734                          | 1,143  | 0       | 0      | 555                                           | 724   | 433                         | 483   | 143                       | 217   | 74       | 74    | 6            | 12    | 42                          | 53    | 138                        | 142  | 113                                           | 127   | 154                          | 165  | 71                                    | 82   | 10        | 23   | 5                       | 8    |
| Turkmenistan                | 16,127             | 19,600 | 1,021              | 1,152 | 12,400                       | 15,421 | 0       | 0      | 1,065                                         | 1,207 | 17                          | 20    | 707                       | 861   | 9        | 14    | 317          | 308   | 67                          | 74    | 127                        | 130  | 0                                             | 0     | 220                          | 182  | 112                                   | 137  | 60        | 90   | 5                       | 4    |
| Uzbekistan                  | 17,720             | 20,331 | 410                | 466   | 14,693                       | 16,782 | 0       | 0      | 966                                           | 1,240 | 14                          | 12    | 516                       | 605   | 9        | 20    | 270          | 280   | 108                         | 105   | 125                        | 129  | 0                                             | 0     | 370                          | 406  | 192                                   | 216  | 46        | 66   | 4                       | 4    |
| Viet Nam                    | 7,695              | 10,167 | 561                | 783   | 2,188                        | 3,752  | 4       | 4      | 2,351                                         | 2,561 | 1,082                       | 985   | 550                       | 969   | 6        | 6     | 109          | 115   | 98                          | 152   | 293                        | 300  | 230                                           | 332   | 145                          | 154  | 67                                    | 40   | 8         | 7    | 3                       | 8    |

Under 5 years, DALYs/100,000, for males and females, 2019

|                              | Total communicable |        | Enteric infections |       | Lower respiratory infections |       | Malaria |      | Neonatal sepsis and other neonatal infections |       | Vaccine Preventable disease |       | Meningitis & Encephalitis |      | HIV/AIDS |       | Tuberculosis |      | Neglected Tropical diseases |      | Infectious skin conditions |      | Sexually transmitted infections excluding HIV |       | Upper respiratory infections |      | Other unspecified infectious diseases |      | Hepatitis |      | Rheumatic heart disease |      |
|------------------------------|--------------------|--------|--------------------|-------|------------------------------|-------|---------|------|-----------------------------------------------|-------|-----------------------------|-------|---------------------------|------|----------|-------|--------------|------|-----------------------------|------|----------------------------|------|-----------------------------------------------|-------|------------------------------|------|---------------------------------------|------|-----------|------|-------------------------|------|
|                              | Female             | Male   | Female             | Male  | Female                       | Male  | Female  | Male | Female                                        | Male  | Female                      | Male  | Female                    | Male | Female   | Male  | Female       | Male | Female                      | Male | Female                     | Male | Female                                        | Male  | Female                       | Male | Female                                | Male | Female    | Male | Female                  | Male |
|                              |                    |        |                    |       |                              |       |         |      |                                               |       |                             |       |                           |      |          |       |              |      |                             |      |                            |      |                                               |       |                              |      |                                       |      |           |      |                         |      |
| American Samoa               | 7,656              | 7,593  | 710                | 765   | 1,974                        | 1,582 | 0       | 0    | 199                                           | 491   | 1,793                       | 1,565 | 331                       | 245  | 61       | 62    | 10           | 8    | 134                         | 89   | 304                        | 364  | 1,889                                         | 2,143 | 136                          | 139  | 75                                    | 125  | 5         | 3    | 34                      | 12   |
| Antigua and Barbuda          | 3,811              | 5,133  | 707                | 585   | 1,688                        | 1,774 | 0       | 0    | 317                                           | 1,501 | 37                          | 18    | 341                       | 388  | 115      | 146   | 14           | 12   | 86                          | 106  | 268                        | 304  | 1                                             | 13    | 167                          | 173  | 58                                    | 102  | 5         | 5    | 7                       | 5    |
| Argentina                    | 3,416              | 4,124  | 413                | 518   | 999                          | 1,297 | 0       | 0    | 1,068                                         | 1,354 | 85                          | 85    | 212                       | 274  | 36       | 37    | 22           | 19   | 61                          | 81   | 224                        | 119  | 39                                            | 39    | 181                          | 198  | 69                                    | 92   | 5         | 8    | 4                       | 4    |
| Bahamas                      | 5,238              | 5,944  | 480                | 588   | 1,422                        | 1,999 | 0       | 0    | 2,123                                         | 2,164 | 16                          | 32    | 249                       | 295  | 308      | 288   | 18           | 28   | 73                          | 70   | 285                        | 260  | 2                                             | 3     | 186                          | 163  | 68                                    | 76   | 4         | 4    | 4                       | 4    |
| Bahrain                      | 1,717              | 1,693  | 432                | 451   | 299                          | 279   | 0       | 0    | 168                                           | 162   | 160                         | 127   | 79                        | 70   | 9        | 9     | 6            | 6    | 36                          | 36   | 167                        | 155  | 155                                           | 178   | 153                          | 164  | 41                                    | 48   | 9         | 7    | 2                       | 2    |
| Barbados                     | 5,783              | 5,673  | 543                | 505   | 1,325                        | 1,356 | 0       | 0    | 2,768                                         | 2,622 | 32                          | 25    | 348                       | 318  | 79       | 94    | 7            | 6    | 102                         | 84   | 334                        | 376  | 18                                            | 11    | 174                          | 166  | 46                                    | 103  | 3         | 3    | 4                       | 3    |
| Belarus                      | 1,966              | 2,436  | 235                | 234   | 341                          | 449   | 0       | 0    | 573                                           | 720   | 7                           | 11    | 416                       | 550  | 23       | 35    | 14           | 15   | 23                          | 24   | 116                        | 119  | 1                                             | 2     | 119                          | 143  | 79                                    | 95   | 21        | 39   | 0                       | 0    |
| Bosnia and Herzegovina       | 1,842              | 2,003  | 322                | 366   | 232                          | 299   | 0       | 0    | 203                                           | 274   | 577                         | 507   | 101                       | 122  | 1        | 1     | 3            | 4    | 35                          | 35   | 150                        | 153  | 75                                            | 91    | 160                          | 107  | 39                                    | 40   | 2         | 4    | 1                       | 0    |
| Bulgaria                     | 2,937              | 3,633  | 383                | 415   | 1,580                        | 2,110 | 0       | 0    | 241                                           | 310   | 20                          | 16    | 287                       | 345  | 32       | 9     | 9            | 12   | 38                          | 39   | 150                        | 155  | 0                                             | 1     | 106                          | 111  | 78                                    | 89   | 12        | 21   | 1                       | 2    |
| Chile                        | 1,751              | 1,841  | 248                | 277   | 414                          | 482   | 0       | 0    | 417                                           | 454   | 65                          | 79    | 115                       | 140  | 16       | 16    | 11           | 7    | 4                           | 5    | 221                        | 113  | 1                                             | 3     | 181                          | 199  | 55                                    | 59   | 3         | 4    | 1                       | 1    |
| Cook Islands                 | 3,473              | 3,924  | 419                | 435   | 515                          | 643   | 0       | 0    | 256                                           | 361   | 440                         | 443   | 23                        | 21   | 232      | 251   | 3            | 4    | 91                          | 86   | 289                        | 303  | 1,026                                         | 1,192 | 135                          | 138  | 39                                    | 41   | 2         | 2    | 4                       | 3    |
| Croatia                      | 1,074              | 1,292  | 248                | 295   | 112                          | 149   | 0       | 0    | 312                                           | 434   | 16                          | 15    | 69                        | 73   | 8        | 6     | 2            | 1    | 23                          | 22   | 147                        | 151  | 0                                             | 0     | 99                           | 107  | 36                                    | 36   | 2         | 2    | 1                       | 1    |
| Dominica                     | 12,609             | 13,418 | 968                | 924   | 2,992                        | 3,667 | 0       | 0    | 4,795                                         | 4,788 | 786                         | 614   | 755                       | 727  | 151      | 313   | 60           | 89   | 157                         | 103  | 377                        | 402  | 1,242                                         | 1,464 | 222                          | 184  | 90                                    | 132  | 7         | 5    | 8                       | 5    |
| Georgia                      | 3,919              | 4,928  | 413                | 441   | 1,130                        | 1,493 | 0       | 0    | 1,542                                         | 1,975 | 38                          | 29    | 232                       | 280  | 8        | 32    | 117          | 118  | 97                          | 121  | 125                        | 129  | 0                                             | 0     | 83                           | 93   | 87                                    | 134  | 12        | 55   | 36                      | 27   |
| Greece                       | 1,022              | 997    | 227                | 260   | 238                          | 257   | 0       | 0    | 24                                            | 47    | 4                           | 5     | 70                        | 75   | 11       | 5     | 2            | 2    | 19                          | 24   | 223                        | 98   | 0                                             | 0     | 179                          | 197  | 21                                    | 22   | 3         | 4    | 1                       | 1    |
| Greenland                    | 2,879              | 3,303  | 248                | 315   | 478                          | 565   | 0       | 0    | 84                                            | 261   | 759                         | 638   | 302                       | 547  | 448      | 454   | 16           | 37   | 20                          | 17   | 212                        | 112  | 74                                            | 83    | 199                          | 213  | 33                                    | 59   | 3         | 2    | 1                       | 2    |
| Hungary                      | 1,192              | 1,400  | 284                | 333   | 290                          | 356   | 0       | 0    | 148                                           | 213   | 11                          | 10    | 86                        | 99   | 5        | 5     | 2            | 1    | 27                          | 27   | 149                        | 153  | 0                                             | 0     | 119                          | 129  | 68                                    | 69   | 2         | 2    | 1                       | 1    |
| Israel                       | 1,030              | 1,055  | 251                | 285   | 126                          | 136   | 0       | 0    | 121                                           | 171   | 17                          | 16    | 60                        | 66   | 27       | 16    | 2            | 1    | 11                          | 14   | 192                        | 91   | 0                                             | 0     | 174                          | 193  | 46                                    | 62   | 1         | 2    | 1                       | 2    |
| Italy                        | 1,029              | 1,033  | 229                | 260   | 84                           | 104   | 0       | 0    | 195                                           | 251   | 6                           | 5     | 52                        | 57   | 12       | 8     | 2            | 1    | 8                           | 7    | 226                        | 101  | 0                                             | 0     | 179                          | 199  | 28                                    | 33   | 4         | 4    | 3                       | 2    |
| Jordan                       | 6,103              | 6,361  | 605                | 582   | 2,282                        | 2,207 | 0       | 0    | 1,542                                         | 1,962 | 753                         | 675   | 243                       | 212  | 42       | 42    | 2            | 2    | 40                          | 44   | 139                        | 142  | 266                                           | 307   | 123                          | 134  | 49                                    | 41   | 15        | 12   | 1                       | 1    |
| Kazakhstan                   | 4,917              | 5,927  | 343                | 343   | 2,403                        | 2,989 | 0       | 0    | 935                                           | 1,158 | 19                          | 20    | 550                       | 656  | 18       | 15    | 98           | 80   | 70                          | 82   | 124                        | 127  | 1                                             | 4     | 120                          | 128  | 220                                   | 301  | 15        | 24   | 1                       | 1    |
| Lebanon                      | 4,187              | 4,223  | 687                | 678   | 768                          | 636   | 0       | 0    | 607                                           | 730   | 931                         | 899   | 122                       | 119  | 246      | 254   | 7            | 7    | 28                          | 32   | 136                        | 139  | 120                                           | 135   | 153                          | 165  | 362                                   | 400  | 18        | 26   | 1                       | 5    |
| Libya                        | 3,716              | 3,643  | 718                | 758   | 1,009                        | 929   | 0       | 0    | 396                                           | 461   | 639                         | 521   | 147                       | 142  | 108      | 109   | 15           | 20   | 76                          | 74   | 139                        | 142  | 137                                           | 154   | 153                          | 164  | 80                                    | 79   | 17        | 20   | 81                      | 69   |
| Malaysia                     | 4,570              | 5,129  | 576                | 626   | 589                          | 756   | 2       | 2    | 820                                           | 1,064 | 561                         | 540   | 170                       | 222  | 1,131    | 1,159 | 24           | 22   | 118                         | 128  | 286                        | 296  | 54                                            | 62    | 162                          | 170  | 70                                    | 74   | 3         | 4    | 3                       | 3    |
| Malta                        | 1,210              | 1,159  | 201                | 220   | 280                          | 313   | 0       | 0    | 121                                           | 77    | 14                          | 15    | 104                       | 118  | 8        | 4     | 1            | 1    | 34                          | 45   | 226                        | 101  | 0                                             | 0     | 186                          | 211  | 31                                    | 51   | 2         | 1    | 1                       | 1    |
| Mauritius                    | 4,475              | 6,177  | 845                | 882   | 935                          | 1,283 | 0       | 0    | 1,687                                         | 2,877 | 34                          | 29    | 238                       | 352  | 47       | 75    | 7            | 9    | 129                         | 117  | 287                        | 294  | 0                                             | 1     | 163                          | 170  | 97                                    | 78   | 2         | 5    | 4                       | 5    |
| Montenegro                   | 1,828              | 1,974  | 205                | 238   | 343                          | 367   | 0       | 0    | 402                                           | 482   | 329                         | 285   | 52                        | 80   | 64       | 64    | 3            | 3    | 41                          | 55   | 146                        | 150  | 100                                           | 110   | 106                          | 105  | 34                                    | 31   | 2         | 2    | 0                       | 1    |
| Niue                         | 10,511             | 12,390 | 764                | 1,055 | 4,702                        | 5,715 | 0       | 0    | 716                                           | 939   | 919                         | 1,028 | 260                       | 360  | 237      | 249   | 39           | 66   | 136                         | 123  | 307                        | 326  | 2,169                                         | 2,184 | 137                          | 141  | 95                                    | 126  | 6         | 5    | 24                      | 76   |
| North Macedonia              | 2,953              | 3,235  | 375                | 453   | 758                          | 858   | 0       | 0    | 493                                           | 606   | 663                         | 600   | 164                       | 181  | 42       | 43    | 10           | 9    | 44                          | 54   | 146                        | 151  | 103                                           | 117   | 99                           | 106  | 49                                    | 47   | 5         | 9    | 1                       | 1    |
| Northern Mariana Islands     | 6,244              | 7,285  | 748                | 767   | 1,596                        | 2,184 | 0       | 0    | 116                                           | 309   | 993                         | 1,092 | 224                       | 194  | 111      | 117   | 21           | 18   | 121                         | 107  | 329                        | 320  | 1,700                                         | 1,930 | 134                          | 137  | 107                                   | 93   | 5         | 4    | 38                      | 12   |
| Oman                         | 3,424              | 3,246  | 557                | 636   | 988                          | 704   | 0       | 0    | 474                                           | 556   | 429                         | 336   | 350                       | 417  | 33       | 34    | 8            | 8    | 75                          | 74   | 141                        | 155  | 39                                            | 46    | 151                          | 163  | 146                                   | 108  | 30        | 6    | 2                       | 2    |
| Palau                        | 13,955             | 13,342 | 889                | 1,059 | 8,694                        | 6,437 | 0       | 0    | 457                                           | 1,204 | 671                         | 968   | 281                       | 31   | 239      | 241   | 23           | 32   | 111                         | 105  | 290                        | 306  | 2,062                                         | 2,726 | 137                          | 139  | 70                                    | 59   | 7         | 11   | 23                      | 23   |
| Poland                       | 1,135              | 1,299  | 229                | 258   | 270                          | 339   | 0       | 0    | 202                                           | 237   | 12                          | 11    | 78                        | 81   | 11       | 15    | 2            | 2    | 31                          | 31   | 147                        | 150  | 0                                             | 0     | 104                          | 112  | 45                                    | 57   | 3         | 5    | 1                       | 1    |
| Portugal                     | 1,225              | 1,326  | 257                | 281   | 180                          | 219   | 0       | 0    | 250                                           | 367   | 11                          | 12    | 56                        | 77   | 29       | 21    | 3            | 3    | 13                          | 13   | 222                        | 96   | 0                                             | 1     | 176                          | 197  | 28                                    | 38   | 1         | 2    | 1                       | 1    |
| Republic of Moldova          | 6,409              | 7,916  | 351                | 340   | 2,951                        | 3,720 | 0       | 0    | 2,314                                         | 3,022 | 18                          | 16    | 226                       | 271  | 7        | 5     | 76           | 63   | 28                          | 27   | 129                        | 130  | 0                                             | 1     | 141                          | 124  | 167                                   | 193  | 3         | 4    | 1                       | 1    |
| Romania                      | 4,152              | 5,078  | 310                | 363   | 2,997                        | 3,834 | 0       | 0    | 80                                            | 105   | 24                          | 23    | 203                       | 207  | 35       | 25    | 109          | 101  | 44                          | 45   | 160                        | 163  | 1                                             | 3     | 100                          | 110  | 81                                    | 92   | 6         | 6    | 1                       | 1    |
| Russian Federation           | 3,156              | 3,721  | 379                | 373   | 924                          | 1,122 | 0       | 0    | 679                                           | 822   | 20                          | 27    | 245                       | 283  | 316      | 411   | 39           | 33   | 23                          | 32   | 127                        | 132  | 4                                             | 7     | 151                          | 187  | 234                                   | 277  | 12        | 14   | 1                       | 1    |
| Saint Kitts and Nevis        | 6,468              | 5,767  | 1,155              | 1,081 | 1,979                        | 1,688 | 0       | 0    | 808                                           | 715   | 24                          | 26    | 562                       | 247  | 1,280    | 1,303 | 17           | 18   | 100                         | 67   | 279                        | 294  | 12                                            | 19    | 170                          | 212  | 74                                    | 94   | 5         | 3    | 2                       | 1    |
| Saudi Arabia                 | 2,761              | 2,953  | 542                | 556   | 172                          | 145   | 0       | 0    | 1,235                                         | 1,458 | 240                         | 212   | 69                        | 54   | 96       | 95    | 8            | 8    | 31                          | 24   | 137                        | 141  | 48                                            | 54    | 152                          | 163  | 25                                    | 27   | 5         | 4    | 1                       | 1    |
| Serbia                       | 1,470              | 1,622  | 202                | 276   | 238                          | 271   | 0       | 0    | 164                                           | 208   | 335                         | 295   | 73                        | 102  | 58       | 59    | 2            | 1    | 30                          | 29   | 149                        | 152  | 75                                            | 86    | 100                          | 107  | 41                                    | 33   | 3         | 3    | 0                       | 0    |
| Seychelles                   | 7,188              | 7,655  | 732                | 719   | 2,261                        | 2,373 | 0       | 0    | 2,208                                         | 2,470 | 891                         | 731   | 208                       | 295  | 67       | 66    | 19           | 17   | 93                          | 110  | 287                        | 295  | 117                                           | 133   | 163                          | 172  | 135                                   | 265  | 3         | 5    | 4                       | 4    |
| Spain                        | 1,205              | 1,211  | 238                | 277   | 104                          | 99    | 0       | 0    | 279                                           | 337   | 23                          | 20    | 73                        | 77   | 19       | 14    | 2            | 1    | 12                          | 25   | 233                        | 108  | 0                                             | 0     | 181                          | 200  | 36                                    | 51   | 2         | 2    | 1                       | 1    |
| Sri Lanka                    | 3,660              | 4,388  | 602                | 674   | 623                          | 731   | 0       | 0    | 1,065                                         | 1,518 | 377                         | 349   | 246                       | 306  | 24       | 24    | 22           | 24   | 152                         | 192  | 274                        | 282  | 48                                            | 55    | 168                          | 175  | 55                                    | 53   | 2         | 3    | 1                       | 2    |
| Trinidad and Tobago          | 4,544              | 4,992  | 608                | 651   | 1,160                        | 1,411 | 0       | 0    | 1,647                                         | 1,881 | 30                          | 25    | 242                       | 216  | 277      | 196   | 15           | 16   | 81                          | 94   | 238                        | 239  | 0                                             | 1     | 167                          | 164  | 72                                    | 90   | 3         | 3    | 5                       | 6    |
| Turkey                       | 4,206              | 4,885  | 692                | 785   | 910                          | 1,235 | 0       | 0    | 1,358                                         | 1,565 | 452                         | 417   | 171                       | 195  | 36       | 36    | 16           | 22   | 46                          | 44   | 140                        | 143  | 97                                            | 110   | 184                          | 192  | 87                                    | 112  | 17        | 24   | 2                       | 3    |
| Ukraine                      | 2,998              | 3,154  | 252                | 265   | 725                          | 709   | 0       | 0    | 880                                           | 1,057 | 71                          | 61    | 475                       | 467  | 101      | 83    | 56           | 43   | 26                          | 32   | 117                        | 121  | 0                                             | 0     | 133                          | 152  | 146                                   | 151  | 13        | 14   | 1                       | 1    |
| United States Virgin Islands | 3,444              | 3,596  | 403                | 361   | 307                          | 357   | 0       | 0</  |                                               |       |                             |       |                           |      |          |       |              |      |                             |      |                            |      |                                               |       |                              |      |                                       |      |           |      |                         |      |

Under 5 years, DALYs/100,000, for males and females, 2019

|                            | Total communicable |       | Enteric infections |      | Lower respiratory infections |       | Malaria |      | Neonatal sepsis and other neonatal infections |       | Vaccine Preventable disease |       | Meningitis & Encephalitis |      | HIV/AIDS |      | Tuberculosis |      | Neglected Tropical diseases |      | Infectious skin conditions |      | Sexually transmitted infections excluding HIV |       | Upper respiratory infections |      | Other unspecified infectious diseases |      | Hepatitis |      | Rheumatic heart disease |      |
|----------------------------|--------------------|-------|--------------------|------|------------------------------|-------|---------|------|-----------------------------------------------|-------|-----------------------------|-------|---------------------------|------|----------|------|--------------|------|-----------------------------|------|----------------------------|------|-----------------------------------------------|-------|------------------------------|------|---------------------------------------|------|-----------|------|-------------------------|------|
|                            | Female             | Male  | Female             | Male | Female                       | Male  | Female  | Male | Female                                        | Male  | Female                      | Male  | Female                    | Male | Female   | Male | Female       | Male | Female                      | Male | Female                     | Male | Female                                        | Male  | Female                       | Male | Female                                | Male | Female    | Male | Female                  | Male |
|                            | Andorra            | 1,120 | 968                | 214  | 266                          | 142   | 77      | 0    | 0                                             | 68    | 102                         | 41    | 32                        | 58   | 36       | 41   | 42           | 1    | 0                           | 9    | 7                          | 228  | 100                                           | 68    | 77                           | 179  | 199                                   | 52   | 22        | 17   | 8                       | 1    |
| Australia                  | 947                | 972   | 109                | 150  | 147                          | 182   | 0       | 0    | 87                                            | 99    | 21                          | 19    | 71                        | 72   | 5        | 3    | 1            | 2    | 17                          | 26   | 229                        | 117  | 0                                             | 1     | 180                          | 202  | 77                                    | 97   | 2         | 3    | 1                       | 1    |
| Austria                    | 993                | 944   | 235                | 277  | 86                           | 102   | 0       | 0    | 123                                           | 103   | 20                          | 17    | 62                        | 83   | 9        | 6    | 1            | 1    | 11                          | 11   | 223                        | 99   | 0                                             | 0     | 177                          | 200  | 45                                    | 42   | 1         | 1    | 2                       | 2    |
| Belgium                    | 1,172              | 1,185 | 291                | 329  | 108                          | 147   | 0       | 0    | 162                                           | 160   | 18                          | 21    | 91                        | 133  | 18       | 13   | 3            | 1    | 9                           | 8    | 222                        | 98   | 0                                             | 0     | 180                          | 199  | 66                                    | 75   | 1         | 1    | 2                       | 1    |
| Bermuda                    | 2,077              | 1,347 | 358                | 338  | 510                          | 284   | 0       | 0    | 353                                           | 52    | 33                          | 31    | 250                       | 65   | 96       | 107  | 10           | 4    | 34                          | 37   | 234                        | 234  | 1                                             | 1     | 166                          | 162  | 29                                    | 30   | 3         | 2    | 1                       | 1    |
| Brunei Darussalam          | 3,446              | 3,691 | 98                 | 135  | 1,020                        | 1,193 | 0       | 0    | 1,090                                         | 1,054 | 174                         | 143   | 152                       | 230  | 75       | 75   | 54           | 33   | 50                          | 32   | 221                        | 115  | 124                                           | 130   | 182                          | 191  | 179                                   | 273  | 24        | 85   | 1                       | 2    |
| Canada                     | 1,220              | 1,190 | 170                | 304  | 135                          | 156   | 0       | 0    | 185                                           | 211   | 27                          | 24    | 65                        | 90   | 8        | 3    | 1            | 1    | 5                           | 6    | 368                        | 106  | 0                                             | 0     | 202                          | 219  | 51                                    | 68   | 1         | 2    | 1                       | 1    |
| Cyprus                     | 982                | 904   | 255                | 296  | 89                           | 87    | 0       | 0    | 61                                            | 79    | 30                          | 25    | 50                        | 46   | 1        | 1    | 1            | 2    | 9                           | 9    | 220                        | 97   | 45                                            | 45    | 175                          | 193  | 43                                    | 21   | 2         | 1    | 1                       | 1    |
| Czechia                    | 994                | 1,265 | 239                | 286  | 161                          | 264   | 0       | 0    | 184                                           | 246   | 14                          | 12    | 60                        | 81   | 6        | 15   | 1            | 1    | 23                          | 24   | 147                        | 151  | 0                                             | 0     | 108                          | 120  | 48                                    | 62   | 2         | 2    | 1                       | 1    |
| Denmark                    | 1,032              | 954   | 303                | 327  | 95                           | 120   | 0       | 0    | 66                                            | 60    | 19                          | 13    | 59                        | 70   | 8        | 6    | 1            | 1    | 10                          | 9    | 256                        | 101  | 0                                             | 0     | 175                          | 193  | 39                                    | 54   | 1         | 1    | 0                       | 1    |
| Estonia                    | 1,219              | 1,363 | 290                | 273  | 386                          | 428   | 0       | 0    | 98                                            | 207   | 3                           | 3     | 104                       | 102  | 15       | 17   | 4            | 3    | 17                          | 18   | 112                        | 118  | 0                                             | 0     | 108                          | 118  | 80                                    | 73   | 2         | 2    | 0                       | 0    |
| Finland                    | 837                | 806   | 219                | 249  | 89                           | 48    | 0       | 0    | 90                                            | 101   | 19                          | 17    | 28                        | 37   | 6        | 4    | 1            | 1    | 9                           | 9    | 225                        | 113  | 0                                             | 0     | 174                          | 190  | 25                                    | 35   | 1         | 1    | 1                       | 1    |
| France                     | 1,100              | 1,100 | 221                | 257  | 81                           | 82    | 0       | 0    | 224                                           | 286   | 18                          | 17    | 73                        | 77   | 11       | 5    | 2            | 1    | 9                           | 8    | 222                        | 98   | 0                                             | 0     | 184                          | 206  | 52                                    | 60   | 1         | 1    | 2                       | 1    |
| Germany                    | 995                | 927   | 252                | 278  | 79                           | 88    | 0       | 0    | 107                                           | 133   | 12                          | 12    | 44                        | 53   | 13       | 8    | 1            | 1    | 5                           | 5    | 276                        | 113  | 0                                             | 0     | 176                          | 196  | 28                                    | 37   | 1         | 1    | 1                       | 1    |
| Guam                       | 8,287              | 8,888 | 684                | 747  | 2,526                        | 2,306 | 0       | 0    | 731                                           | 1,367 | 1,151                       | 1,090 | 293                       | 316  | 263      | 270  | 34           | 20   | 77                          | 72   | 320                        | 332  | 1,962                                         | 2,146 | 133                          | 136  | 73                                    | 65   | 5         | 4    | 35                      | 15   |
| Iceland                    | 1,039              | 897   | 271                | 293  | 145                          | 109   | 0       | 0    | 85                                            | 68    | 20                          | 18    | 61                        | 73   | 6        | 4    | 1            | 1    | 10                          | 8    | 221                        | 98   | 0                                             | 0     | 178                          | 195  | 38                                    | 29   | 1         | 1    | 2                       | 2    |
| Ireland                    | 909                | 900   | 217                | 255  | 85                           | 95    | 0       | 0    | 85                                            | 124   | 12                          | 11    | 54                        | 64   | 5        | 4    | 1            | 1    | 8                           | 8    | 224                        | 99   | 0                                             | 0     | 175                          | 193  | 41                                    | 46   | 1         | 1    | 1                       | 1    |
| Japan                      | 873                | 838   | 55                 | 65   | 197                          | 228   | 0       | 0    | 72                                            | 93    | 11                          | 10    | 44                        | 45   | 7        | 12   | 2            | 1    | 20                          | 11   | 227                        | 120  | 0                                             | 0     | 180                          | 200  | 52                                    | 46   | 4         | 6    | 1                       | 1    |
| Kuwait                     | 1,998              | 2,085 | 425                | 457  | 876                          | 940   | 0       | 0    | 193                                           | 176   | 9                           | 9     | 105                       | 109  | 13       | 5    | 12           | 6    | 27                          | 30   | 141                        | 141  | 0                                             | 0     | 152                          | 164  | 40                                    | 43   | 3         | 5    | 1                       | 1    |
| Latvia                     | 1,507              | 1,656 | 275                | 282  | 437                          | 479   | 0       | 0    | 205                                           | 250   | 7                           | 16    | 185                       | 130  | 47       | 43   | 10           | 9    | 37                          | 46   | 115                        | 121  | 0                                             | 0     | 108                          | 119  | 67                                    | 149  | 12        | 12   | 0                       | 1    |
| Lithuania                  | 1,706              | 1,756 | 296                | 289  | 512                          | 525   | 0       | 0    | 419                                           | 413   | 6                           | 7     | 140                       | 134  | 8        | 19   | 16           | 16   | 23                          | 23   | 117                        | 119  | 0                                             | 0     | 109                          | 122  | 57                                    | 85   | 2         | 3    | 0                       | 1    |
| Luxembourg                 | 1,009              | 950   | 306                | 327  | 90                           | 92    | 0       | 0    | 40                                            | 60    | 14                          | 15    | 51                        | 49   | 5        | 3    | 1            | 1    | 11                          | 9    | 221                        | 97   | 0                                             | 0     | 176                          | 194  | 91                                    | 101  | 1         | 1    | 1                       | 1    |
| Monaco                     | 1,133              | 1,046 | 219                | 247  | 166                          | 139   | 0       | 0    | 184                                           | 178   | 20                          | 13    | 35                        | 64   | 20       | 22   | 3            | 1    | 9                           | 7    | 223                        | 98   | 59                                            | 68    | 174                          | 191  | 18                                    | 16   | 1         | 2    | 1                       | 0    |
| Netherlands                | 1,279              | 1,288 | 209                | 240  | 82                           | 101   | 0       | 0    | 416                                           | 432   | 20                          | 21    | 104                       | 118  | 9        | 5    | 1            | 1    | 9                           | 8    | 188                        | 95   | 0                                             | 0     | 184                          | 209  | 53                                    | 57   | 1         | 1    | 1                       | 1    |
| New Zealand                | 1,279              | 1,367 | 188                | 240  | 233                          | 245   | 0       | 0    | 205                                           | 280   | 21                          | 16    | 98                        | 119  | 4        | 3    | 3            | 1    | 22                          | 37   | 230                        | 122  | 0                                             | 0     | 190                          | 207  | 83                                    | 94   | 1         | 1    | 2                       | 1    |
| Norway                     | 902                | 832   | 237                | 273  | 48                           | 65    | 0       | 0    | 84                                            | 74    | 10                          | 12    | 49                        | 55   | 7        | 4    | 1            | 1    | 8                           | 9    | 237                        | 88   | 0                                             | 0     | 182                          | 200  | 38                                    | 48   | 1         | 1    | 1                       | 1    |
| Puerto Rico                | 3,014              | 3,600 | 461                | 499  | 523                          | 633   | 0       | 0    | 1,297                                         | 1,755 | 23                          | 20    | 130                       | 94   | 42       | 32   | 3            | 3    | 52                          | 55   | 235                        | 246  | 1                                             | 2     | 167                          | 163  | 76                                    | 95   | 3         | 3    | 2                       | 1    |
| Qatar                      | 1,643              | 1,766 | 417                | 470  | 282                          | 340   | 0       | 0    | 48                                            | 59    | 252                         | 221   | 124                       | 74   | 9        | 9    | 5            | 5    | 26                          | 17   | 141                        | 147  | 141                                           | 163   | 151                          | 163  | 39                                    | 83   | 4         | 10   | 2                       | 3    |
| Republic of Korea          | 1,254              | 1,231 | 49                 | 66   | 104                          | 113   | 0       | 0    | 277                                           | 359   | 95                          | 79    | 57                        | 66   | 4        | 13   | 13           | 11   | 47                          | 9    | 224                        | 113  | 152                                           | 175   | 173                          | 192  | 54                                    | 28   | 3         | 5    | 1                       | 1    |
| San Marino                 | 1,716              | 1,426 | 233                | 250  | 89                           | 112   | 0       | 0    | 240                                           | 262   | 204                         | 169   | 142                       | 96   | 25       | 26   | 2            | 1    | 61                          | 27   | 223                        | 98   | 57                                            | 63    | 276                          | 229  | 150                                   | 74   | 11        | 19   | 2                       | 1    |
| Singapore                  | 961                | 866   | 39                 | 40   | 294                          | 336   | 0       | 0    | 88                                            | 73    | 15                          | 12    | 49                        | 41   | 4        | 5    | 3            | 2    | 26                          | 16   | 222                        | 113  | 0                                             | 0     | 172                          | 190  | 46                                    | 36   | 2         | 2    | 1                       | 1    |
| Slovakia                   | 1,762              | 2,035 | 266                | 328  | 706                          | 835   | 0       | 0    | 76                                            | 105   | 190                         | 157   | 108                       | 166  | 12       | 13   | 1            | 2    | 27                          | 26   | 147                        | 152  | 77                                            | 88    | 100                          | 108  | 46                                    | 50   | 4         | 4    | 1                       | 1    |
| Slovenia                   | 864                | 887   | 212                | 243  | 84                           | 87    | 0       | 0    | 212                                           | 181   | 14                          | 12    | 33                        | 21   | 5        | 12   | 1            | 1    | 22                          | 24   | 147                        | 153  | 0                                             | 0     | 98                           | 105  | 35                                    | 46   | 2         | 2    | 1                       | 1    |
| Sweden                     | 996                | 974   | 258                | 279  | 84                           | 96    | 0       | 0    | 111                                           | 179   | 11                          | 18    | 37                        | 42   | 6        | 5    | 1            | 1    | 8                           | 7    | 254                        | 101  | 0                                             | 0     | 182                          | 200  | 40                                    | 45   | 1         | 1    | 1                       | 1    |
| Switzerland                | 998                | 1,018 | 281                | 307  | 84                           | 106   | 0       | 0    | 135                                           | 209   | 9                           | 9     | 35                        | 37   | 6        | 5    | 1            | 1    | 11                          | 6    | 225                        | 98   | 0                                             | 0     | 176                          | 193  | 34                                    | 44   | 1         | 2    | 1                       | 1    |
| Taiwan (Province of China) | 1,529              | 1,660 | 316                | 350  | 318                          | 369   | 0       | 0    | 246                                           | 254   | 10                          | 9     | 94                        | 100  | 8        | 16   | 20           | 15   | 34                          | 29   | 275                        | 279  | 0                                             | 1     | 116                          | 123  | 86                                    | 107  | 5         | 5    | 1                       | 1    |
| United Arab Emirates       | 1,677              | 1,623 | 386                | 421  | 169                          | 106   | 0       | 0    | 191                                           | 210   | 328                         | 291   | 82                        | 84   | 65       | 65   | 7            | 8    | 39                          | 35   | 142                        | 145  | 32                                            | 38    | 152                          | 163  | 66                                    | 43   | 7         | 8    | 13                      | 3    |
| United Kingdom             | 1,272              | 1,287 | 222                | 254  | 208                          | 250   | 0       | 0    | 85                                            | 116   | 23                          | 25    | 93                        | 130  | 14       | 9    | 2            | 2    | 39                          | 9    | 222                        | 99   | 95                                            | 116   | 188                          | 208  | 78                                    | 65   | 2         | 3    | 1                       | 1    |
| United States of America   | 1,210              | 1,395 | 151                | 169  | 221                          | 288   | 0       | 0    | 305                                           | 359   | 22                          | 20    | 75                        | 83   | 12       | 13   | 1            | 1    | 11                          | 12   | 99                         | 104  | 1                                             | 1     | 205                          | 223  | 103                                   | 118  | 2         | 2    | 1                       | 2    |

**S12 (B)** Percentage change in DALYs/100,000 for each communicable condition for each location for under 5 year olds by sex. The colours on this heat map are green for values less than 0, the darker the green the greater the reduction in DALYs/100,000 between 1990 and 2019, the orange tones represent positive numbers, an increase in DALYs/ 100,000, with darker shades indicating worse outcome.

|         |                             | <5 year            |       |                    |       |                              |       |         |       |                                               |       |                             |       |                           |       |          |          |              |       |                             |       |                            |       |                                               |       |                              |       |                                       |       |           |       |                         |       |
|---------|-----------------------------|--------------------|-------|--------------------|-------|------------------------------|-------|---------|-------|-----------------------------------------------|-------|-----------------------------|-------|---------------------------|-------|----------|----------|--------------|-------|-----------------------------|-------|----------------------------|-------|-----------------------------------------------|-------|------------------------------|-------|---------------------------------------|-------|-----------|-------|-------------------------|-------|
|         |                             | Total communicable |       | Enteric infections |       | Lower respiratory infections |       | Malaria |       | Neonatal sepsis and other neonatal infections |       | Vaccine Preventable disease |       | Meningitis & Encephalitis |       | HIV/AIDS |          | Tuberculosis |       | Neglected Tropical diseases |       | Infectious skin conditions |       | Sexually transmitted infections excluding HIV |       | Upper respiratory infections |       | Other unspecified infectious diseases |       | Hepatitis |       | Rheumatic heart disease |       |
|         |                             | Female             | Male  | Female             | Male  | Female                       | Male  | Female  | Male  | Female                                        | Male  | Female                      | Male  | Female                    | Male  | Female   | Male     | Female       | Male  | Female                      | Male  | Female                     | Male  | Female                                        | Male  | Female                       | Male  | Female                                | Male  | Female    | Male  | Female                  | Male  |
|         | Afghanistan                 | -2.7%              | -2.7% | -2.4%              | -1.9% | -2.6%                        | -2.7% | -0.4%   | -0.1% | -0.3%                                         | -0.3% | -3.0%                       | -3.0% | -2.7%                     | -2.7% | 6.7%     | 6.5%     | -2.9%        | -2.9% | -2.7%                       | -2.9% | -0.0%                      | -0.1% | -0.4%                                         | -0.2% | -0.5%                        | -0.6% | -1.8%                                 | -2.1% | -2.3%     | -2.9% | -2.3%                   | -2.7% |
|         | Benin                       | -2.0%              | -2.0% | -2.3%              | -2.4% | -2.2%                        | -2.2% | -0.7%   | -0.6% | -1.1%                                         | -1.2% | -2.6%                       | -2.5% | -2.3%                     | -2.0% | 6.6%     | 6.6%     | -2.6%        | -2.4% | -1.9%                       | -1.7% | -0.6%                      | -0.4% | -1.7%                                         | -1.6% | -0.8%                        | -0.8% | -1.1%                                 | -1.2% | -1.6%     | -2.5% | -2.4%                   | -2.0% |
|         | Burkina Faso                | -2.0%              | -2.0% | -2.3%              | -2.3% | -1.6%                        | -1.5% | -1.4%   | -1.4% | -0.9%                                         | -0.9% | -2.9%                       | -2.9% | -1.8%                     | -1.8% | -3.1%    | -3.1%    | -1.6%        | -1.6% | -1.2%                       | -1.2% | 0.4%                       | 0.1%  | -0.9%                                         | -0.8% | -0.7%                        | -1.0% | -0.5%                                 | -0.6% | -1.4%     | -2.5% | -1.1%                   | -1.3% |
|         | Burundi                     | -2.4%              | -2.4% | -1.9%              | -1.1% | -2.4%                        | -2.7% | -2.4%   | -2.5% | -0.7%                                         | -1.0% | -3.1%                       | -3.1% | -2.5%                     | -2.6% | -3.1%    | -3.1%    | -2.5%        | -2.6% | -2.2%                       | -2.2% | -0.5%                      | -0.4% | -1.8%                                         | -1.8% | -2.3%                        | -2.2% | -2.2%                                 | -2.5% | -2.1%     | -2.1% | -2.7%                   | -2.6% |
|         | Central African Republic    | -1.4%              | -1.4% | -1.4%              | -1.2% | -1.5%                        | -1.4% | -0.4%   | -0.7% | 0.1%                                          | 0.1%  | -2.1%                       | -2.1% | -2.0%                     | -2.1% | -2.9%    | -2.9%    | -1.1%        | -1.0% | -2.7%                       | -2.7% | -0.3%                      | -0.1% | -0.9%                                         | -0.6% | -1.7%                        | -1.2% | -1.2%                                 | -1.0% | -1.4%     | -2.0% | -1.7%                   | -1.0% |
|         | Chad                        | -1.6%              | -1.6% | -1.0%              | -1.0% | -1.6%                        | -1.5% | -1.7%   | -1.9% | -1.3%                                         | -1.0% | -2.6%                       | -2.6% | -1.4%                     | -1.1% | -0.7%    | -0.8%    | -1.8%        | -1.6% | -1.5%                       | -1.6% | -0.5%                      | -0.3% | -1.4%                                         | -1.4% | -0.7%                        | -0.8% | -1.4%                                 | -1.6% | -1.0%     | -1.8% | -2.1%                   | -2.0% |
|         | Côte d'Ivoire               | -2.0%              | -2.1% | -2.3%              | -2.4% | -2.0%                        | -2.0% | -1.4%   | -1.7% | -1.2%                                         | -1.1% | -2.9%                       | -3.0% | -2.4%                     | -2.3% | -2.6%    | -2.6%    | -2.2%        | -2.0% | -1.7%                       | -1.8% | -0.6%                      | -0.3% | -1.7%                                         | -1.7% | -0.6%                        | -0.8% | -1.3%                                 | -1.7% | -1.7%     | -2.6% | -2.1%                   | -2.1% |
|         | Dem Rep of the Congo        | -2.4%              | -2.4% | -2.3%              | -1.8% | -2.6%                        | -2.8% | -2.2%   | -2.3% | -1.0%                                         | -0.9% | -2.8%                       | -2.8% | -2.8%                     | -2.8% | -2.9%    | -2.9%    | -2.8%        | -2.8% | -2.3%                       | -2.7% | -0.7%                      | -0.5% | -1.9%                                         | -1.8% | -2.3%                        | -2.4% | -2.0%                                 | -2.3% | -2.6%     | -2.9% | -2.5%                   | -2.5% |
|         | Eritrea                     | -2.6%              | -2.6% | -2.4%              | -2.5% | -2.5%                        | -2.7% | -2.9%   | -2.9% | -0.9%                                         | -0.9% | -3.2%                       | -3.2% | -2.5%                     | -2.5% | -2.0%    | -2.0%    | -2.7%        | -2.7% | -2.9%                       | -2.9% | -0.3%                      | -0.1% | -1.7%                                         | -1.6% | -2.5%                        | -2.3% | -2.4%                                 | -2.5% | -2.2%     | -2.3% | -2.7%                   | -2.6% |
|         | Ethiopia                    | -2.7%              | -2.7% | -2.6%              | -2.6% | -2.8%                        | -2.9% | 0.1%    | 0.2%  | -1.0%                                         | -1.2% | -3.1%                       | -3.1% | -2.8%                     | -2.8% | -2.1%    | -2.1%    | -3.0%        | -3.0% | -3.1%                       | -3.1% | -1.1%                      | -0.6% | -2.5%                                         | -2.6% | -2.8%                        | -2.7% | -2.1%                                 | -2.2% | -2.7%     | -2.6% | -2.9%                   | -2.9% |
|         | Gambia                      | -2.6%              | -2.6% | -2.3%              | -2.3% | -2.5%                        | -2.7% | -3.0%   | -3.0% | -1.4%                                         | -1.4% | -3.0%                       | -3.0% | 2.6%                      | -2.6% | 7.7%     | 7.5%     | 2.5%         | -2.5% | -1.5%                       | -1.7% | -0.4%                      | -0.2% | -1.3%                                         | -1.4% | -0.7%                        | -0.7% | -0.9%                                 | -1.5% | -1.8%     | -1.9% | -2.6%                   | -2.6% |
|         | Guinea                      | -2.2%              | -2.1% | -2.4%              | -2.3% | -2.3%                        | -2.3% | -1.2%   | -1.0% | -1.2%                                         | -1.2% | -2.8%                       | -2.8% | -1.9%                     | -1.6% | 2.1%     | 2.2%     | -2.6%        | -2.3% | -1.7%                       | -1.7% | -0.8%                      | -0.5% | -1.7%                                         | -1.6% | -1.0%                        | -0.9% | -1.4%                                 | -1.7% | -1.8%     | -2.1% | -2.5%                   | -2.2% |
|         | Guinea-Bissau               | -2.5%              | -2.5% | -2.2%              | -2.3% | -2.6%                        | -2.8% | -2.7%   | -2.7% | -1.5%                                         | -1.3% | -2.6%                       | -2.6% | -2.7%                     | -2.8% | 0.1%     | 0.2%     | -2.8%        | -2.9% | -2.0%                       | -2.3% | -0.8%                      | -0.6% | -2.1%                                         | -2.1% | -1.1%                        | -1.1% | -1.3%                                 | -2.0% | -2.2%     | -2.8% | -2.8%                   | -2.8% |
|         | Haiti                       | -2.3%              | -2.2% | -2.5%              | -2.5% | -2.3%                        | -2.2% | -2.6%   | -2.4% | 0.3%                                          | -0.0% | -2.5%                       | -2.2% | -2.3%                     | -2.1% | -2.5%    | -2.6%    | -2.6%        | -2.7% | -1.4%                       | -1.2% | -0.6%                      | -0.4% | -0.4%                                         | -0.5% | -1.9%                        | -2.0% | -0.7%                                 | -0.7% | -2.8%     | -2.5% | -2.6%                   | -2.3% |
|         | Liberia                     | -2.7%              | -2.7% | -2.7%              | -2.6% | -3.0%                        | -3.1% | -2.1%   | -2.3% | -1.8%                                         | -1.8% | -3.1%                       | -3.1% | -3.0%                     | -3.1% | -1.5%    | -1.6%    | -3.1%        | -3.1% | -2.6%                       | -2.7% | -1.3%                      | -1.1% | -0.8%                                         | -0.8% | -1.2%                        | -1.2% | -2.2%                                 | -2.6% | -2.8%     | -3.0% | -3.1%                   | -3.0% |
| Low SDI | Madagascar                  | -2.2%              | -2.2% | -2.2%              | -2.1% | -2.4%                        | -2.5% | -1.9%   | -2.1% | -1.0%                                         | -1.1% | -2.6%                       | -2.6% | -2.7%                     | -2.7% | 804.3%   | 804.7%   | -2.7%        | -2.7% | -2.1%                       | -2.1% | -0.7%                      | -0.4% | -0.9%                                         | -0.8% | -2.4%                        | -2.4% | -1.0%                                 | -1.5% | -2.7%     | -2.9% | -2.7%                   | -2.6% |
|         | Malawi                      | -2.7%              | -2.7% | -2.9%              | -2.9% | -2.5%                        | -2.4% | -2.7%   | -2.8% | -1.3%                                         | -1.3% | -3.0%                       | -3.0% | -2.7%                     | -2.7% | -2.7%    | -2.7%    | -2.8%        | -2.8% | -2.4%                       | -2.4% | -0.8%                      | -0.5% | -0.6%                                         | -0.5% | -2.7%                        | -2.6% | -1.6%                                 | -1.9% | -2.7%     | -3.0% | -2.8%                   | -2.8% |
|         | Mali                        | -2.2%              | -2.1% | -2.7%              | -2.3% | -1.0%                        | -1.6% | -2.2%   | -2.1% | -0.9%                                         | -1.0% | -2.8%                       | -2.8% | -2.5%                     | -1.5% | 1.0%     | 0.9%     | -2.0%        | -2.1% | -1.7%                       | -1.5% | -0.5%                      | -0.3% | -0.7%                                         | -0.6% | -1.2%                        | -0.9% | -1.4%                                 | -0.9% | -2.1%     | -2.8% | -2.4%                   | -2.0% |
|         | Mozambique                  | -2.6%              | -2.6% | -2.9%              | -3.0% | -2.6%                        | -2.7% | -2.7%   | -2.6% | -1.1%                                         | -1.0% | -3.1%                       | -3.1% | -2.7%                     | -2.7% | 14.2%    | 15.1%    | -2.8%        | -2.7% | -2.4%                       | -2.4% | -0.3%                      | -0.1% | 2.5%                                          | -2.4% | -2.8%                        | -2.5% | -0.8%                                 | -1.4% | -2.7%     | -3.0% | -2.9%                   | -2.7% |
|         | Nepal                       | -2.9%              | -2.9% | -3.1%              | -3.1% | -2.8%                        | -2.8% | -3.3%   | -3.3% | -0.9%                                         | -1.0% | -3.1%                       | -3.1% | -3.0%                     | -2.9% | 5,675.0% | 5,785.6% | -3.2%        | -3.1% | -2.7%                       | -2.9% | -0.0%                      | -0.0% | -1.1%                                         | -1.0% | -2.3%                        | -2.0% | -0.9%                                 | -1.7% | -2.9%     | -2.9% | -3.1%                   | -2.9% |
|         | Niger                       | -2.3%              | -2.3% | -2.4%              | -2.4% | -2.4%                        | -2.5% | -1.9%   | -1.7% | -1.0%                                         | -0.9% | -2.4%                       | -2.3% | -2.6%                     | -2.5% | -2.2%    | -2.2%    | -2.7%        | -2.6% | -1.9%                       | -1.8% | -0.8%                      | -0.5% | -2.1%                                         | -1.9% | -1.3%                        | -1.0% | -1.8%                                 | -1.8% | -2.3%     | -2.6% | -2.6%                   | -2.4% |
|         | Pakistan                    | -2.3%              | -2.4% | -2.2%              | -2.3% | -1.7%                        | -2.0% | -3.0%   | -2.9% | -0.7%                                         | -1.1% | -3.1%                       | -3.1% | -2.1%                     | -2.1% | 19.0%    | 21.4%    | -2.6%        | -2.1% | -2.2%                       | -2.2% | 0.0%                       | 0.0%  | -1.2%                                         | -1.2% | -1.9%                        | -1.6% | -1.0%                                 | -1.3% | -2.4%     | -2.2% | -2.3%                   | -1.3% |
|         | Papua New Guinea            | -1.4%              | -1.5% | -1.6%              | -1.6% | -1.3%                        | -1.5% | -1.9%   | -2.2% | 0.2%                                          | 0.2%  | -2.1%                       | -2.2% | -1.9%                     | -2.1% | 457.9%   | 482.8%   | -1.9%        | -2.0% | -1.1%                       | -1.2% | 0.1%                       | 0.0%  | -0.6%                                         | -0.6% | -0.3%                        | -0.3% | 0.4%                                  | 0.2%  | -1.8%     | -2.4% | -0.7%                   | -0.6% |
|         | Rwanda                      | -2.7%              | -2.7% | -3.0%              | -3.0% | -2.6%                        | -2.8% | -2.6%   | -2.6% | -1.1%                                         | -1.2% | -3.0%                       | -3.0% | -2.7%                     | -2.7% | -2.6%    | -2.7%    | -2.9%        | -2.9% | -2.3%                       | -2.3% | -0.4%                      | -0.4% | -1.4%                                         | -1.3% | -2.2%                        | -2.2% | -2.2%                                 | -2.4% | -2.3%     | -2.8% | -2.8%                   | -2.8% |
|         | Senegal                     | -2.5%              | -2.5% | -2.6%              | -2.7% | -2.4%                        | -2.5% | -2.4%   | -2.4% | -1.3%                                         | -1.3% | -2.8%                       | -2.8% | -2.7%                     | -2.8% | -1.5%    | -1.6%    | -2.8%        | -2.8% | -1.9%                       | -2.1% | -0.7%                      | -0.5% | -1.7%                                         | -1.7% | -1.0%                        | -0.8% | -1.3%                                 | -1.5% | -2.7%     | -2.9% | -2.8%                   | -2.9% |
|         | Sierra Leone                | -2.2%              | -2.2% | -2.7%              | -2.8% | -2.3%                        | -2.2% | -1.7%   | -1.4% | -1.3%                                         | -1.1% | -2.8%                       | -2.8% | -2.4%                     | -2.3% | -0.6%    | -0.8%    | -2.4%        | -2.4% | -1.9%                       | -1.9% | -0.7%                      | -0.3% | -1.5%                                         | -1.4% | -1.0%                        | -1.0% | -1.1%                                 | -1.4% | -1.6%     | -2.5% | -2.6%                   | -2.4% |
|         | Solomon Islands             | -1.9%              | -1.9% | -2.4%              | -2.5% | -2.1%                        | -2.1% | -2.2%   | -2.2% | -0.9%                                         | -1.0% | -2.8%                       | -2.8% | -2.4%                     | -2.5% | 1.4%     | 1.5%     | -2.5%        | -2.4% | -1.4%                       | -0.6% | -0.0%                      | -0.1% | 0.0%                                          | 0.2%  | -0.2%                        | -0.1% | -1.2%                                 | -1.3% | -2.4%     | -2.8% | -2.1%                   | -1.1% |
|         | Somalia                     | -2.1%              | -2.0% | -2.0%              | -1.4% | -1.8%                        | -2.0% | -2.6%   | -2.7% | -0.3%                                         | -0.6% | -2.3%                       | -2.4% | -1.4%                     | -1.4% | 28.0%    | 28.2%    | -1.7%        | -1.9% | -3.2%                       | -3.2% | -0.2%                      | -0.2% | -0.7%                                         | -0.6% | -2.0%                        | -1.6% | -2.2%                                 | -2.4% | -1.3%     | -1.6% | -2.3%                   | -2.2% |
|         | South Sudan                 | -1.8%              | -1.8% | -1.4%              | -1.3% | -2.0%                        | -2.0% | -1.1%   | -1.0% | -0.6%                                         | -0.8% | -2.6%                       | -2.6% | -1.7%                     | -1.7% | 2.6%     | 2.6%     | -2.0%        | -2.0% | -2.9%                       | -2.9% | -0.5%                      | -0.3% | -0.5%                                         | -0.5% | -2.1%                        | -1.9% | -2.4%                                 | -2.5% | -1.6%     | -1.2% | -2.4%                   | -2.3% |
|         | Togo                        | -2.1%              | -2.1% | -1.9%              | -2.0% | -2.3%                        | -2.2% | -1.8%   | -1.9% | -1.3%                                         | -1.3% | -3.0%                       | -3.0% | -2.5%                     | -2.5% | -1.1%    | -1.3%    | -2.4%        | -2.4% | -1.7%                       | -1.8% | -0.6%                      | -0.4% | -2.0%                                         | -2.0% | -0.5%                        | -0.5% | -1.3%                                 | -1.6% | -2.1%     | -2.8% | -2.6%                   | -2.5% |
|         | Uganda                      | -2.5%              | -2.6% | -2.8%              | -2.8% | -2.2%                        | -2.5% | -2.5%   | -2.6% | -0.9%                                         | -1.2% | -2.6%                       | -2.6% | -2.5%                     | -2.6% | -3.2%    | -3.2%    | -2.5%        | -2.6% | -2.9%                       | -2.9% | -0.3%                      | -0.2% | 2.1%                                          | 2.2%  | -2.4%                        | -2.4% | -2.2%                                 | -2.4% | -1.9%     | -2.1% | -2.4%                   | -2.5% |
|         | United Republic of Tanzania | -2.5%              | -2.6% | -3.0%              | -3.0% | -2.4%                        | -2.6% | -2.5%   | -2.5% | -0.8%                                         | -0.8% | -2.7%                       | -2.7% | -2.3%                     | -2.5% | -3.0%    | -3.0%    | -2.3%        | -2.4% | -2.2%                       | -2.2% | -0.1%                      | -0.1% | 3.1%                                          | -2.1% | -2.1%                        | -2.2% | -1.0%                                 | -1.3% | -2.1%     | -2.5% | -2.2%                   | -2.2% |
|         | Yemen                       | -2.7%              | -2.7% | -2.6%              | -2.6% | -2.7%                        | -2.7% | -3.1%   | -3.1% | -0.6%                                         | -0.7% | -3.0%                       | -3.0% | -2.8%                     | -2.6% | 3.8%     | 3.9%     | -3.0%        | -2.9% | -1.8%                       | -2.1% | -0.0%                      | -0.1% | -0.5%                                         | -0.4% | -0.7%                        | -0.9% | -0.0%                                 | -0.6% | -3.0%     | -3.2% | -2.7%                   | -2.5% |

|                                       |                | <5 year            |       |                    |       |                              |       |          |          |                                               |       |                             |       |                           |       |          |          |              |       |                             |       |                            |       |                                               |       |                              |       |                                       |       |           |       |                         |       |
|---------------------------------------|----------------|--------------------|-------|--------------------|-------|------------------------------|-------|----------|----------|-----------------------------------------------|-------|-----------------------------|-------|---------------------------|-------|----------|----------|--------------|-------|-----------------------------|-------|----------------------------|-------|-----------------------------------------------|-------|------------------------------|-------|---------------------------------------|-------|-----------|-------|-------------------------|-------|
|                                       |                | Total communicable |       | Enteric infections |       | Lower respiratory infections |       | Malaria  |          | Neonatal sepsis and other neonatal infections |       | Vaccine Preventable disease |       | Meningitis & Encephalitis |       | HIV/AIDS |          | Tuberculosis |       | Neglected Tropical diseases |       | Infectious skin conditions |       | Sexually transmitted infections excluding HIV |       | Upper respiratory infections |       | Other unspecified infectious diseases |       | Hepatitis |       | Rheumatic heart disease |       |
|                                       |                | Female             | Male  | Female             | Male  | Female                       | Male  | Female   | Male     | Female                                        | Male  | Female                      | Male  | Female                    | Male  | Female   | Male     | Female       | Male  | Female                      | Male  | Female                     | Male  | Female                                        | Male  | Female                       | Male  | Female                                | Male  | Female    | Male  |                         |       |
| Angola                                | Low-middle SDI | -2.7%              | -2.8% | -2.9%              | -3.0% | -2.9%                        | -2.9% | -1.6%    | -1.2%    | -1.5%                                         | -0.9% | -2.8%                       | -2.7% | -2.8%                     | -2.7% | 13.3%    | 13.5%    | -3.0%        | -2.9% | -3.1%                       | -3.0% | -0.7%                      | -0.3% | -1.4%                                         | -0.9% | -2.7%                        | -2.5% | -2.0%                                 | -1.9% | -2.8%     | -3.1% | -3.0%                   | -2.7% |
| Bangladesh                            |                | -2.8%              | -2.8% | -3.1%              | -3.1% | -2.7%                        | -2.8% | -3.2%    | -3.2%    | -1.4%                                         | -1.1% | -3.2%                       | -3.2% | -1.4%                     | -1.7% | -3.1%    | -3.2%    | -2.6%        | -2.7% | -0.2%                       | -0.7% | -1.7%                      | -1.7% | -1.7%                                         | -1.7% | -2.2%                        | -1.7% | -1.9%                                 | -1.7% | -2.8%     | -3.1% | -2.5%                   | -2.6% |
| Belize                                |                | -2.4%              | -2.2% | -2.8%              | -2.7% | -2.5%                        | -2.2% | -3.3%    | -3.3%    | -0.7%                                         | -0.2% | -2.6%                       | -2.6% | -2.8%                     | -2.7% | -2.5%    | -2.4%    | -3.1%        | -3.0% | -1.2%                       | -0.7% | -0.1%                      | -0.3% | -2.9%                                         | -2.7% | -0.4%                        | -1.3% | -1.0%                                 | -0.6% | -3.2%     | -3.0% | -2.8%                   | -2.6% |
| Bhutan                                |                | -2.9%              | -2.9% | -2.7%              | -2.6% | -2.7%                        | -2.8% | -3.3%    | -3.3%    | -1.3%                                         | -1.6% | -3.3%                       | -3.3% | -2.5%                     | -2.5% | 9.9%     | 9.9%     | -3.0%        | -3.0% | -2.1%                       | -2.3% | -0.3%                      | -0.4% | -0.5%                                         | -0.5% | -2.1%                        | -1.7% | -0.8%                                 | -1.0% | -2.7%     | -2.9% | -2.6%                   | -2.2% |
| Bolivia (Plurinational State of)      |                | -2.7%              | -2.7% | -3.0%              | -2.9% | -2.8%                        | -2.9% | -3.3%    | -3.3%    | -0.7%                                         | -0.4% | -2.9%                       | -2.9% | -2.8%                     | -2.8% | 4.2%     | 4.1%     | -3.2%        | -3.2% | -2.1%                       | -2.2% | -0.4%                      | -0.4% | -2.1%                                         | -2.0% | -2.4%                        | -2.3% | -1.0%                                 | -1.2% | 3.0%      | -3.0% | -2.9%                   | -2.8% |
| Cabo Verde                            |                | -2.9%              | -2.9% | -3.1%              | -3.1% | -2.7%                        | -2.7% | 382.4%   | 392.5%   | -0.3%                                         | -1.0% | -3.3%                       | -3.3% | -2.9%                     | -3.0% | -1.5%    | -1.7%    | -3.0%        | -3.0% | -1.3%                       | -1.5% | -0.6%                      | -0.5% | -1.9%                                         | -1.9% | -0.3%                        | -0.3% | -0.9%                                 | -2.8% | -2.9%     | -3.1% | -3.0%                   | -3.0% |
| Cambodia                              |                | -2.8%              | -2.8% | -3.0%              | -3.0% | -2.8%                        | -2.7% | -3.1%    | -3.2%    | -0.9%                                         | -1.1% | -3.1%                       | -3.1% | -2.8%                     | -2.8% | 55.5%    | 55.3%    | -3.1%        | -3.0% | -2.2%                       | -2.2% | -0.2%                      | -0.2% | -2.2%                                         | -2.1% | -1.2%                        | -1.9% | -1.7%                                 | -1.3% | -2.5%     | -2.3% | -2.8%                   | -2.8% |
| Cameroon                              |                | -1.9%              | -1.9% | -2.1%              | -2.0% | -1.6%                        | -1.6% | -0.5%    | -0.8%    | -1.0%                                         | -1.1% | -2.8%                       | -2.8% | -2.0%                     | -1.9% | 0.4%     | 0.4%     | -1.8%        | -1.7% | -1.7%                       | -1.6% | -0.2%                      | -0.0% | -2.0%                                         | -2.1% | -0.5%                        | -0.5% | -1.6%                                 | -1.9% | -1.3%     | -0.2% | -2.2%                   | -1.9% |
| Comoros                               |                | -2.4%              | -2.5% | -2.5%              | -2.5% | -2.3%                        | -2.5% | -2.9%    | -3.1%    | -1.1%                                         | -1.4% | -2.4%                       | -2.5% | -2.4%                     | -2.4% | 55.7%    | 51.7%    | -2.6%        | -2.8% | -1.5%                       | -1.7% | -0.5%                      | -0.3% | -2.0%                                         | -2.0% | -2.4%                        | -2.4% | -2.1%                                 | -2.3% | -2.0%     | -2.1% | -2.6%                   | -2.5% |
| Congo                                 |                | -2.5%              | -2.4% | -2.7%              | -2.5% | -2.7%                        | -2.6% | -2.2%    | -2.0%    | -0.8%                                         | -0.5% | -2.3%                       | -2.2% | -2.7%                     | -2.6% | -2.7%    | -2.6%    | -2.9%        | -2.8% | -3.0%                       | -3.0% | -0.7%                      | -0.3% | -1.5%                                         | -1.3% | -1.8%                        | -1.8% | -1.8%                                 | -1.7% | -2.7%     | -2.7% | -2.8%                   | -2.4% |
| Democratic People's Republic of Korea |                | -2.9%              | -2.9% | -2.1%              | -2.0% | -3.0%                        | -3.0% | 1,194.0% | 1,360.9% | -0.9%                                         | -0.9% | -3.2%                       | -3.2% | -2.7%                     | -2.7% | 27.8%    | 28.1%    | -3.0%        | -2.9% | -2.2%                       | -2.2% | -0.5%                      | -0.5% | -1.1%                                         | -1.1% | -2.4%                        | -2.1% | -2.0%                                 | -2.3% | -3.1%     | -3.2% | -2.8%                   | -2.6% |
| Djibouti                              |                | -2.2%              | -2.4% | -2.8%              | -2.9% | -2.0%                        | -2.1% | -1.6%    | -1.8%    | -1.1%                                         | -1.1% | -2.3%                       | -2.3% | -2.0%                     | -1.9% | 46.5%    | 46.2%    | -2.4%        | -2.3% | -2.9%                       | -2.9% | -0.3%                      | 0.0%  | -0.8%                                         | -0.6% | -2.0%                        | -1.8% | -2.0%                                 | -2.0% | -1.8%     | -1.6% | -2.3%                   | -2.2% |
| Dominican Republic                    |                | -2.4%              | -2.3% | -3.0%              | -3.0% | -2.8%                        | -2.7% | -3.1%    | -3.2%    | 0.1%                                          | -0.2% | -2.1%                       | -1.9% | -2.8%                     | -2.7% | -2.7%    | -2.6%    | -3.1%        | -3.0% | -1.6%                       | -1.6% | -0.4%                      | -0.6% | 0.0%                                          | 0.1%  | 0.1%                         | -0.6% | -1.9%                                 | -2.0% | -3.0%     | -2.8% | -2.9%                   | -2.7% |
| El Salvador                           |                | -2.8%              | -2.8% | -3.2%              | -3.1% | -2.8%                        | -2.7% | -3.3%    | -3.3%    | -2.2%                                         | -2.4% | -2.8%                       | -2.8% | -3.1%                     | -3.1% | 15.9%    | 17.3%    | -3.2%        | -3.2% | -1.0%                       | -1.8% | -0.3%                      | -0.2% | -1.9%                                         | -1.9% | -0.9%                        | -0.6% | -2.1%                                 | -2.1% | -2.4%     | -2.4% | -2.8%                   | -2.6% |
| Eswatini                              |                | -1.3%              | -1.5% | -1.2%              | -1.1% | -1.2%                        | -1.1% | -2.8%    | -2.8%    | -0.2%                                         | -0.8% | -2.9%                       | -3.0% | -1.7%                     | -1.9% | 62.4%    | 63.6%    | -1.7%        | -1.8% | -2.0%                       | -1.9% | -0.0%                      | -0.1% | -2.2%                                         | -2.3% | -0.8%                        | -1.0% | -0.8%                                 | -1.2% | -1.8%     | -1.8% | -2.4%                   | -2.3% |
| Ghana                                 |                | -2.3%              | -2.2% | -2.9%              | -3.0% | -2.2%                        | -1.9% | -1.3%    | -0.7%    | -0.2%                                         | 0.4%  | -3.0%                       | -2.9% | -2.3%                     | -2.1% | -2.4%    | -2.5%    | -2.6%        | -2.3% | -1.6%                       | -1.2% | -0.2%                      | 0.0%  | -0.6%                                         | -0.1% | -0.0%                        | 0.0%  | -1.0%                                 | -1.2% | -2.3%     | -2.6% | -2.4%                   | -1.9% |
| Guatemala                             |                | -2.6%              | -2.5% | -3.2%              | -2.9% | -2.3%                        | -2.2% | -3.2%    | -3.2%    | -1.7%                                         | -1.7% | -3.0%                       | -3.0% | -2.4%                     | -2.4% | 6.1%     | 5.4%     | -3.2%        | -3.2% | -2.9%                       | -2.9% | -0.3%                      | -0.5% | -3.1%                                         | -3.2% | -2.5%                        | -2.2% | -0.6%                                 | -0.2% | -2.0%     | -1.7% | -2.5%                   | -2.3% |
| Honduras                              |                | -2.7%              | -2.9% | -2.9%              | -2.8% | -2.8%                        | -2.7% | -3.2%    | -3.2%    | -1.4%                                         | -1.2% | -2.7%                       | -2.5% | -2.5%                     | -2.2% | 2.4%     | 2.4%     | -3.1%        | -3.0% | 0.1%                        | -0.6% | -0.4%                      | -0.4% | -1.8%                                         | -1.6% | -2.2%                        | -2.0% | -1.5%                                 | -1.4% | -3.0%     | -2.8% | -0.7%                   | -0.5% |
| India                                 |                | -2.6%              | -2.7% | -2.8%              | -2.8% | -2.4%                        | -2.6% | -2.9%    | -3.0%    | -1.3%                                         | -1.5% | -3.0%                       | -3.1% | -2.8%                     | -2.6% | 3.7%     | 4.7%     | -3.0%        | -2.9% | -2.4%                       | -2.5% | -1.0%                      | -0.7% | -1.8%                                         | -1.9% | -2.0%                        | -1.6% | -1.6%                                 | -1.7% | -2.4%     | -2.2% | -2.7%                   | -2.7% |
| Kenya                                 |                | -2.3%              | -2.3% | -2.0%              | -1.8% | -2.3%                        | -2.5% | -2.2%    | -2.3%    | -0.8%                                         | -0.9% | -2.8%                       | -2.9% | -2.5%                     | -2.6% | -2.5%    | -2.5%    | -2.6%        | -2.7% | -2.1%                       | -2.1% | -0.2%                      | -0.1% | -1.9%                                         | -2.1% | -1.6%                        | -1.8% | -0.8%                                 | -0.9% | -2.2%     | -2.2% | -2.4%                   | -2.4% |
| Kiribati                              |                | -2.2%              | -2.2% | -2.6%              | -2.5% | -2.4%                        | -2.4% |          |          | -0.3%                                         | -0.5% | -2.0%                       | -1.9% | -2.6%                     | -2.6% | 0.7%     | 0.7%     | -2.6%        | -2.6% | -1.0%                       | -0.8% | -0.1%                      | -0.2% | -0.3%                                         | -0.2% | -0.8%                        | -0.1% | -0.8%                                 | -1.3% | -2.5%     | -2.9% | -2.3%                   | -2.1% |
| Kyrgyzstan                            |                | -2.8%              | -2.8% | -2.9%              | -2.9% | -2.9%                        | -2.9% | -3.3%    | -3.3%    | 0.2%                                          | 0.1%  | -1.8%                       | -1.8% | -2.8%                     | -2.8% | 3.4%     | 7.2%     | -2.6%        | -2.6% | -0.3%                       | -0.6% | -0.2%                      | -0.2% | -3.3%                                         | -3.2% | -2.4%                        | -1.6% | 1.9%                                  | 1.3%  | -3.1%     | -3.0% | -2.4%                   | -2.3% |
| Lao People's Democratic Republic      |                | -2.8%              | -2.8% | -2.9%              | -3.0% | -2.8%                        | -2.8% | -3.0%    | -3.0%    | -0.9%                                         | -1.0% | -3.0%                       | -3.0% | -2.8%                     | -2.7% | 3,959.6% | 3,998.5% | -3.0%        | -3.0% | -2.1%                       | -2.1% | -0.2%                      | -0.2% | -1.2%                                         | -1.0% | -1.5%                        | -2.5% | -1.7%                                 | -1.7% | -3.2%     | -3.2% | -2.7%                   | -2.6% |
| Lesotho                               |                | -1.2%              | -1.1% | -2.1%              | -2.0% | -1.0%                        | -0.7% |          |          | -0.5%                                         | -0.5% | -2.9%                       | -2.9% | -1.7%                     | -1.4% | 9.9%     | 10.3%    | -1.1%        | -0.5% | -1.8%                       | -1.8% | 0.0%                       | 0.1%  | -1.5%                                         | -1.5% | -0.8%                        | -0.7% | -1.1%                                 | -1.1% | -1.2%     | -2.5% | -1.5%                   | -0.9% |
| Maldives                              |                | -2.9%              | -2.8% | -2.9%              | -3.0% | -2.9%                        | -2.8% | -1.3%    | -1.6%    | -3.2%                                         | -3.2% | -2.7%                       | -2.7% | -2.7%                     | -2.7% | 5.8%     | 7.4%     | -3.2%        | -3.2% | -2.4%                       | -2.1% | -0.1%                      | -0.1% | -1.7%                                         | -1.7% | -0.2%                        | -0.6% | -1.8%                                 | -2.2% | -3.2%     | -3.0% | -3.2%                   | -3.0% |
| Marshall Islands                      |                | -1.5%              | -1.6% | -2.5%              | -2.6% | -1.5%                        | -1.6% |          |          | -0.5%                                         | -0.6% | -1.5%                       | -1.6% | -1.9%                     | -2.1% | 1.7%     | 1.7%     | -2.2%        | -2.2% | -0.6%                       | -0.8% | -0.0%                      | -0.1% | -0.1%                                         | 0.0%  | -0.0%                        | -0.1% | -0.5%                                 | -0.4% | -2.5%     | -2.5% | -0.5%                   | -1.1% |
| Mauritania                            |                | -2.3%              | -2.3% | -2.5%              | -2.3% | -2.4%                        | -2.5% | 9.1%     | 7.9%     | -1.4%                                         | -1.5% | -3.1%                       | -3.1% | -2.6%                     | -2.5% | -3.1%    | -3.0%    | -2.8%        | -2.8% | -1.8%                       | -1.8% | -0.7%                      | -0.5% | -1.6%                                         | -1.6% | -0.4%                        | -0.4% | -1.7%                                 | -1.9% | -2.3%     | -2.7% | -2.9%                   | -2.8% |
| Micronesia (Federated States of)      |                | -2.3%              | -2.2% | -2.8%              | -2.7% | -2.6%                        | -2.5% |          |          | -1.0%                                         | -1.1% | -2.5%                       | -2.4% | -2.7%                     | -2.7% | -1.6%    | -1.6%    | -2.9%        | -2.9% | -1.6%                       | -1.6% | -0.1%                      | -0.1% | -1.0%                                         | -1.0% | -0.0%                        | -0.1% | -1.3%                                 | -1.2% | -2.8%     | -2.7% | -2.4%                   | -2.0% |
| Mongolia                              |                | -3.0%              | -3.0% | -3.1%              | -3.1% | -3.0%                        | -3.1% |          |          | -0.7%                                         | -1.0% | -2.8%                       | -2.8% | -3.1%                     | -3.0% | 294.7%   | 295.4%   | -3.1%        | -3.2% | -2.3%                       | -2.1% | -0.5%                      | -1.0% | 1.5%                                          | 1.4%  | -2.1%                        | -2.1% | -1.8%                                 | -3.0% | -3.2%     | -3.2% | -2.0%                   | -2.9% |
| Morocco                               |                | -2.9%              | -2.9% | -3.0%              | -3.0% | -3.0%                        | -2.9% | -3.3%    | -3.3%    | -1.0%                                         | -1.1% | -3.0%                       | -3.1% | -2.8%                     | -2.9% | 3.8%     | 3.8%     | -3.1%        | -3.1% | -1.8%                       | -1.7% | -0.0%                      | -0.0% | -1.4%                                         | -1.4% | 0.1%                         | -0.0% | -1.5%                                 | -1.7% | -3.0%     | -3.1% | -2.9%                   | -2.9% |
| Myanmar                               |                | -2.8%              | -2.8% | -3.0%              | -3.2% | -2.8%                        | -2.7% | -3.2%    | -3.2%    | -1.4%                                         | -1.2% | -2.9%                       | -2.9% | -2.9%                     | -2.4% | 17.3%    | 17.9%    | -2.9%        | -2.9% | -2.3%                       | -1.8% | -0.1%                      | -0.1% | 0.2%                                          | 0.7%  | -1.1%                        | -1.5% | -1.1%                                 | -2.1% | -2.9%     | -2.9% | -2.7%                   | -2.4% |
| Nicaragua                             |                | -2.8%              | -2.8% | -3.1%              | -3.2% | -2.7%                        | -2.6% | -3.2%    | -3.2%    | -1.9%                                         | -1.8% | -3.3%                       | -3.2% | -2.9%                     | -2.9% | 15.3%    | 15.5%    | -3.2%        | -3.2% | -1.3%                       | -1.9% | -0.2%                      | -0.4% | -2.3%                                         | -2.3% | -0.1%                        | -0.4% | -2.3%                                 | -2.2% | -2.9%     | -2.8% | -2.8%                   | -2.7% |
| Nigeria                               |                | -2.0%              | -2.1% | -2.1%              | -2.4% | -1.8%                        | -1.9% | -1.9%    | -1.8%    | -0.8%                                         | -0.8% | -2.8%                       | -2.8% | -1.7%                     | -1.6% | 4.0%     | 3.9%     | -2.4%        | -2.3% | -1.8%                       | -1.8% | -0.2%                      | -0.1% | -0.0%                                         | -0.1% | -1.0%                        | -0.5% | -0.7%                                 | -0.7% | -2.2%     | -2.7% | -2.4%                   | -2.2% |
| Palestine                             |                | -2.7%              | -2.6% | -2.0%              | -1.9% | -2.9%                        | -2.8% |          |          | -1.4%                                         | -1.0% | -3.2%                       | -3.2% | -3.0%                     | -2.9% | 18.0%    | 18.0%    | -3.1%        | -3.0% | -2.3%                       | -2.6% | -0.0%                      | 0.0%  | -0.9%                                         | -0.8% | -0.1%                        | -0.1% | -1.7%                                 | -1.6% | -3.1%     | -2.8% | -2.9%                   | -2.8% |
| Sao Tome and Principe                 |                | -2.8%              | -2.8% | -3.1%              | -3.1% | -2.8%                        | -2.9% | -0.1%    | -2.1%    | -1.5%                                         | -1.1% | -3.1%                       | -3.2% | -2.6%                     | -2.6% | 2.0%     | 0.8%     | -3.0%        | -3.1% | -1.9%                       | -2.1% | -0.9%                      | -0.7% | -1.4%                                         | -1.4% | -0.6%                        | -0.6% | -1.4%                                 | -1.9% | -2.8%     | -3.1% | -3.0%                   | -2.9% |
| Sudan                                 |                | -2.9%              | -2.9% | -2.7%              | -2.8% | -2.9%                        | -2.9% | -2.1%    | -2.6%    | -1.2%                                         | -1.3% | -3.2%                       | -3.2% | -3.0%                     | -2.9% | 2.0%     | 2.0%     | -3.1%        | -3.1% | -2.7%                       | -2.6% | 0.0%                       | 0.0%  | -0.8%                                         | -0.5% | -0.4%                        | -0.4% | -1.4%                                 | -1.5% | -2.9%     | -3.1% | -3.0%                   | -2.7% |
| Tajikistan                            |                | -2.7%              | -2.6% | -2.8%              | -2.9% | -2.7%                        | -2.5% | -3.3%    | -3.3%    | 0.4%                                          | -0.2% | -1.9%                       | -1.8% | -2.8%                     | -2.9% | 2.2%     | 2.4%     | -2.4%        | -2.1% | -1.5%                       | -1.3% | 0.0%                       | 0.0%  | -1.4%                                         | -1.4% | -2.1%                        | -1.8% | -0.8%                                 | -0.6% | -3.0%     | -3.0% | -2.6%                   | -2.5% |
| Timor-Leste                           |                | -2.8%              | -2.8% | -2.8%              | -2.8% | -2.8%                        | -2.9% | -3.3%    | -3.3%    | -1.2%                                         | -1.2% | -3.0%                       | -3.0% | -2.6%                     | -2.6% | 6.1%     | 6.2%     | -3.0%        | -3.0% | -2.1%                       | -1.9% | -0.1%                      | -0.2% | -1.3%                                         | -1.1% | -1.4%                        | -1.7% | -1.1%                                 | -1.3% | -3.1%     | -3.1% | -2.6%                   | -2.1% |
| Tuvalu                                |                | -2.8%              | -2.7% | -2.5%              | -2.5% | -3.0%                        | -3.0% |          |          | -1.3%                                         | -1.3% | -2.7%                       | -2.6% | -3.0%                     | -3.0% | 19.4%    | 20.6%    | -3.2%        | -3.2% | -1.7%                       | -1.3% | -0.2%                      | -0.5% | -1.2%                                         | -1.2% | -0.2%                        | -0.3% | -1.6%                                 | -2.0% | -3.1%     | -3.1% | -3.0%                   | -2.9% |
| Vanuatu                               |                | -1.5%              | -1.4% | -2.0%              | -2.0% | -1.3%                        | -1.3% | -3.3%    | -3.3%    | -0.7%                                         | -0.7% | -2.0%                       | -2.0% | -1.4%                     | -1.5% | 1.2%     | 1.4%     | -2.0%        | -1.8% | 0.6%                        | 0.8%  | 0.1%                       | 0.1%  | 0.6%                                          | 0.7%  | -0.1%                        | -0.1% | -0.2%                                 | 0.0%  | -2.1%     | -2.8% | -0.8%                   | -0.3% |
| Venezuela (Bolivarian Republic of)    |                | -2.1%              | -2.1% | -2.8%              | -2.8% | -2.0%                        | -1.8% | 4.0%     | 2.0%     | -0.7%                                         | -0.9% | -2.0%                       | -1.8% | -2.6%                     | -2.7% | -2.7%    | -2.8%    | -2.8%        | -2.9% | -1.5%                       | -1.2% | -0.1%                      | -0.2% | -0.8%                                         | -1.2% | -0.5%                        | -0.6% | -0.4%                                 | -0.3% | -3.0%     | -3.0% | -2.7%                   | -2.7% |
| Zambia                                |                | -2.6%              | -2.6% | -2.6%              | -2.5% | -2.8%                        | -2.8% | -2.5%    | -2.6%    | -1.0%                                         | -1.0% | -3.1%                       | -3.1% | -3.0%                     | -3.0% | -1.7%    | -1.7%    | -3.0%        | -3.0% | -3.1%                       | -3.1% | -0.5%                      | -0.3% | -1.2%                                         | -1.2% | -2.6%                        | -2.5% | -1.7%                                 | -2.0% | -2.7%     | -2.9% | -3.0%                   | -2.8% |
| Zimbabwe                              |                | -1.3%              | -1.4% | -1.1%              | -1.4% | -0.2%                        | -0.4% | -1.4%    | -1.7%    | -0.2%                                         | -0.1% | -2.4%                       | -2.5% | -1.2%                     | -1.3% | -2.2%    | -2.2%    | 0.3%         | -0.1% | -1.9%                       | -1.9% | 0.1%                       | 0.0%  | -0.5%                                         | -0.4% | -0.3%                        | -0.4% | 0.4%                                  | 0.2%  | -0.1%     | -2.3% | -0.0%                   | 0.0%  |



<5 year

|                                  | Total communicable |       | Enteric infections |       | Lower respiratory infections |       | Malaria |       | Neonatal sepsis and other neonatal infections |       | Vaccine Preventable disease |       | Meningitis & Encephalitis |       | HIV/AIDS |        | Tuberculosis |       | Neglected Tropical diseases |       | Infectious skin conditions |       | Sexually transmitted infections excluding HIV |       | Upper respiratory infections |       | Other unspecified infectious diseases |       | Hepatitis |       | Rheumatic heart disease |       |
|----------------------------------|--------------------|-------|--------------------|-------|------------------------------|-------|---------|-------|-----------------------------------------------|-------|-----------------------------|-------|---------------------------|-------|----------|--------|--------------|-------|-----------------------------|-------|----------------------------|-------|-----------------------------------------------|-------|------------------------------|-------|---------------------------------------|-------|-----------|-------|-------------------------|-------|
|                                  | Female             | Male  | Female             | Male  | Female                       | Male  | Female  | Male  | Female                                        | Male  | Female                      | Male  | Female                    | Male  | Female   | Male   | Female       | Male  | Female                      | Male  | Female                     | Male  | Female                                        | Male  | Female                       | Male  | Female                                | Male  | Female    | Male  | Female                  | Male  |
|                                  |                    |       |                    |       |                              |       |         |       |                                               |       |                             |       |                           |       |          |        |              |       |                             |       |                            |       |                                               |       |                              |       |                                       |       |           |       |                         |       |
| Albania                          | -2.9%              | -2.9% | -2.8%              | -2.8% | -3.0%                        | -3.0% | -1.8%   | -1.2% | -3.1%                                         | -3.2% | -2.8%                       | -2.8% | 0.5%                      | 0.8%  | -3.0%    | -3.2%  | -2.0%        | -2.3% | -2.1%                       | -1.0% | -1.6%                      | -1.3% | -0.9%                                         | -1.1% | -2.0%                        | -2.0% | -3.1%                                 | -3.0% | -1.4%     | -2.7% |                         |       |
| Algeria                          | -2.8%              | -2.8% | -2.7%              | -3.0% | -2.9%                        | -2.9% | -3.0%   | -3.0% | -0.9%                                         | -0.9% | -3.0%                       | -3.0% | -2.8%                     | -2.8% | 0.2%     | 0.3%   | -3.1%        | -3.0% | -1.8%                       | -1.9% | -0.1%                      | -0.1% | -1.9%                                         | -1.9% | -0.9%                        | -0.1% | -1.2%                                 | -1.5% | -3.1%     | -3.0% | -2.8%                   | -2.5% |
| Armenia                          | -2.7%              | -2.6% | -3.1%              | -3.1% | -2.8%                        | -2.6% | -3.3%   | -3.3% | -1.5%                                         | -1.9% | -1.1%                       | -0.9% | -1.8%                     | -1.0% | 15.9%    | 8.9%   | -2.6%        | -2.5% | 0.3%                        | 0.1%  | 0.0%                       | 0.0%  | -2.8%                                         | -3.0% | -2.5%                        | -0.8% | 1.0%                                  | 1.5%  | -3.1%     | -2.4% | -0.3%                   | -1.1% |
| Azerbaijan                       | -2.6%              | -2.7% | -3.0%              | -3.1% | -2.6%                        | -2.7% | -3.3%   | -3.3% | 0.4%                                          | -0.1% | -2.4%                       | -2.4% | -1.5%                     | -1.9% | 0.2%     | 0.3%   | -2.9%        | -2.9% | -1.5%                       | -1.8% | -0.1%                      | -0.0% | -0.8%                                         | -1.0% | -1.8%                        | -1.9% | 1.6%                                  | 1.1%  | -3.0%     | -3.0% | -1.9%                   | -2.0% |
| Botswana                         | -1.8%              | -1.8% | -2.1%              | -2.1% | 0.1%                         | -0.2% | 1.8%    | 2.7%  | -0.7%                                         | -0.8% | -2.6%                       | -2.8% | -0.5%                     | -0.5% | 3.9%     | -3.0%  | -0.9%        | -0.8% | -2.0%                       | -1.9% | -0.0%                      | -0.0% | -1.8%                                         | -1.9% | -0.3%                        | -0.3% | -1.0%                                 | -0.8% | -1.3%     | -2.1% | -0.9%                   | -0.7% |
| Brazil                           | -2.8%              | -2.7% | -3.1%              | -3.1% | -2.8%                        | -2.8% | -3.3%   | -3.3% | -1.6%                                         | -1.5% | -2.5%                       | -2.6% | -2.9%                     | -2.9% | -2.2%    | -2.2%  | -3.1%        | -3.1% | -0.9%                       | -0.8% | 0.1%                       | -0.2% | -1.7%                                         | -1.8% | -1.0%                        | -1.2% | -0.7%                                 | -0.7% | -2.7%     | -2.6% | -2.7%                   | -2.7% |
| China                            | -3.1%              | -3.1% | -3.2%              | -3.1% | -3.2%                        | -3.1% | -3.3%   | -3.3% | 0.0%                                          | -0.8% | -3.2%                       | -3.2% | -2.9%                     | -2.9% | 2.5%     | 2.7%   | -3.2%        | -3.2% | -2.8%                       | -2.8% | -0.7%                      | -0.7% | -1.3%                                         | -1.4% | -2.6%                        | -2.4% | -2.6%                                 | -2.8% | -3.2%     | -3.2% | -3.2%                   | -3.1% |
| Colombia                         | -2.3%              | -2.3% | -2.5%              | -3.0% | -2.4%                        | -2.5% | -3.2%   | -3.3% | 0.6%                                          | 0.9%  | -2.5%                       | -2.7% | -2.6%                     | -2.7% | 8.0%     | 3.3%   | -2.8%        | -2.9% | 1.5%                        | 0.3%  | -0.1%                      | -0.3% | -2.5%                                         | -2.5% | -1.0%                        | -1.2% | -0.9%                                 | -0.7% | -2.5%     | -2.3% | -2.8%                   | -2.9% |
| Costa Rica                       | -2.2%              | -2.4% | -2.4%              | -2.6% | -2.5%                        | -2.5% | -3.3%   | -3.3% | -2.1%                                         | -2.8% | -2.1%                       | -1.9% | -2.3%                     | -2.6% | -1.6%    | -1.3%  | -2.9%        | -3.0% | -1.8%                       | -1.7% | -0.0%                      | -0.1% | -2.7%                                         | -1.5% | -0.1%                        | -0.1% | -0.2%                                 | 0.4%  | -2.9%     | -3.0% | -1.8%                   | -1.7% |
| Cuba                             | -2.2%              | -2.3% | -2.3%              | -2.5% | -2.2%                        | -2.2% |         |       | -0.9%                                         | -1.5% | -1.5%                       | -1.6% | -3.0%                     | -3.0% | 3.3%     | 9.4%   | -3.3%        | -2.3% | -1.5%                       | -1.3% | -0.1%                      | -0.3% | -3.0%                                         | -3.1% | -0.4%                        | -0.5% | -0.5%                                 | -0.3% | -3.0%     | -3.0% | -1.9%                   | -1.7% |
| Ecuador                          | -2.6%              | -2.6% | -3.1%              | -3.1% | -2.6%                        | -2.5% | -3.3%   | -3.3% | -1.7%                                         | -2.0% | -2.3%                       | -2.3% | -2.6%                     | -2.5% | 8.3%     | 9.9%   | -3.2%        | -3.1% | -2.5%                       | -2.4% | 0.0%                       | 0.0%  | -1.5%                                         | -1.6% | -1.5%                        | -1.5% | -1.5%                                 | -1.4% | -3.1%     | -3.0% | -2.3%                   | -2.4% |
| Egypt                            | -2.9%              | -2.8% | -2.8%              | -2.7% | -3.0%                        | -2.9% | -3.3%   | -3.3% | -1.3%                                         | -1.4% | -3.2%                       | -3.2% | -2.5%                     | -2.4% | -2.7%    | -2.7%  | -3.1%        | -3.1% | -2.7%                       | -2.8% | -0.2%                      | -0.2% | -1.7%                                         | -1.6% | -1.0%                        | -0.9% | -2.0%                                 | -2.1% | -3.2%     | -3.1% | -3.2%                   | -3.0% |
| Equatorial Guinea                | -2.8%              | -2.8% | -3.2%              | -3.2% | -3.1%                        | -3.1% | -2.2%   | -2.0% | -1.7%                                         | -1.4% | -3.1%                       | -3.0% | -3.0%                     | -3.8% | 27.2%    | 27.0%  | -3.3%        | -3.2% | -2.9%                       | -3.0% | -1.1%                      | -0.5% | -1.0%                                         | -0.2% | -2.8%                        | -2.7% | -2.4%                                 | -2.3% | -3.2%     | -3.2% | -3.1%                   | -3.0% |
| Fiji                             | -1.0%              | -1.0% | -0.4%              | -0.5% | -0.6%                        | -0.7% | -1.1%   | -1.2% | -2.1%                                         | -2.3% | -1.4%                       | -1.5% | 3.3%                      | 3.5%  | -1.5%    | -0.9%  | 0.0%         | -0.6% | 0.0%                        | 0.1%  | -0.1%                      | -0.1% | 0.0%                                          | -0.1% | 0.0%                         | -0.1% | 0.2%                                  | 0.9%  | -1.5%     | -1.8% | 0.1%                    | 0.3%  |
| Gabon                            | -2.4%              | -2.4% | -2.8%              | -2.6% | -2.8%                        | -2.7% | -2.3%   | -2.3% | -0.8%                                         | -0.9% | -2.8%                       | -2.7% | -2.8%                     | -2.7% | 0.5%     | 0.4%   | -3.0%        | -2.9% | -2.7%                       | -2.7% | -0.6%                      | -0.6% | -1.9%                                         | -1.8% | -1.5%                        | -1.8% | -1.9%                                 | -2.0% | -2.9%     | -2.8% | -2.7%                   | -2.3% |
| Grenada                          | -1.3%              | -1.6% | -1.7%              | -2.5% | -1.5%                        | -1.8% |         |       | 0.4%                                          | 0.1%  | -2.1%                       | -2.3% | -2.7%                     | -2.9% | -2.3%    | -2.2%  | -2.5%        | -2.8% | -1.8%                       | -1.7% | 0.1%                       | -0.1% | -3.0%                                         | -3.0% | -0.1%                        | -1.1% | -0.9%                                 | -0.6% | -2.9%     | -3.0% | -2.4%                   | -2.5% |
| Guatemala                        | -2.1%              | -2.1% | -2.7%              | -2.8% | -1.8%                        | -1.9% | -3.1%   | -3.1% | -0.5%                                         | 0.4%  | -2.5%                       | -2.8% | -2.3%                     | -2.4% | -0.7%    | -1.2%  | -2.7%        | -2.8% | -0.6%                       | -0.8% | 0.3%                       | 0.1%  | -2.9%                                         | -2.9% | -0.1%                        | -0.4% | -0.9%                                 | -0.5% | -2.9%     | -2.9% | -2.6%                   | -2.4% |
| Indonesia                        | -2.7%              | -2.6% | -2.7%              | -2.8% | -2.8%                        | -2.8% | -3.0%   | -3.1% | -1.3%                                         | -1.5% | -2.9%                       | -2.9% | -2.7%                     | -2.6% | 289.1%   | 322.8% | -3.0%        | -3.0% | -2.5%                       | -1.6% | -0.1%                      | -0.1% | 0.2%                                          | 0.7%  | -0.3%                        | -0.5% | -1.4%                                 | -1.7% | -3.2%     | -2.8% | -2.9%                   | -2.8% |
| Iran (Islamic Republic of)       | -3.0%              | -2.9% | -2.8%              | -2.8% | -3.1%                        | -3.1% | -3.3%   | -3.3% | -1.4%                                         | -1.3% | -3.2%                       | -3.2% | -3.0%                     | -2.9% | 93.6%    | 96.7%  | -3.2%        | -3.2% | -2.4%                       | -2.3% | -0.1%                      | -0.1% | -1.2%                                         | -1.2% | -0.2%                        | -0.1% | -1.2%                                 | -1.5% | -3.2%     | -3.1% | -3.1%                   | -3.0% |
| Iraq                             | -2.6%              | -2.7% | -2.8%              | -2.8% | -2.8%                        | -3.0% | -3.3%   | -3.3% | -1.5%                                         | -0.8% | -2.8%                       | -2.8% | -2.5%                     | -2.8% | 17.2%    | 17.3%  | -3.0%        | -3.1% | -2.6%                       | -2.7% | -0.0%                      | -0.2% | -0.9%                                         | -0.9% | -0.7%                        | -0.6% | -1.3%                                 | -2.1% | -3.0%     | -3.0% | -3.0%                   | -2.8% |
| Jamaica                          | -1.7%              | -2.0% | -2.5%              | -3.0% | -2.5%                        | -2.5% |         |       | 2.0%                                          | 0.6%  | -2.3%                       | -2.5% | -2.6%                     | -2.8% | 0.8%     | 1.0%   | -2.6%        | -3.0% | -0.7%                       | -0.5% | -0.0%                      | -0.2% | -3.2%                                         | -1.3% | -0.1%                        | -0.1% | 0.2%                                  | 0.4%  | -1.3%     | -2.5% | -3.0%                   | -2.9% |
| Mexico                           | -2.7%              | -2.7% | -3.1%              | -3.1% | -2.8%                        | -2.8% | -3.3%   | -3.3% | -0.6%                                         | -0.6% | -2.9%                       | -2.9% | -2.6%                     | -2.6% | 0.9%     | -0.3%  | -3.1%        | -3.1% | -2.3%                       | -2.1% | -0.1%                      | -0.1% | -3.1%                                         | -3.1% | -2.4%                        | -2.4% | -1.5%                                 | -1.2% | -2.3%     | -2.1% | -2.9%                   | -2.8% |
| Namibia                          | -1.8%              | -1.9% | -1.9%              | -1.7% | -1.8%                        | -2.0% | -2.2%   | -2.2% | -0.7%                                         | -0.8% | -3.1%                       | -3.1% | -1.9%                     | -2.1% | 4.8%     | 4.9%   | -2.2%        | -2.4% | -1.4%                       | -1.6% | -0.1%                      | -0.1% | -1.3%                                         | -1.2% | -0.8%                        | -0.9% | -1.3%                                 | -1.5% | -2.1%     | -2.5% | -2.4%                   | -2.3% |
| Nauru                            | -1.5%              | -1.4% | -1.1%              | -1.3% | -1.4%                        | -1.4% |         |       | -0.5%                                         | -0.4% | -3.0%                       | -3.0% | -1.6%                     | -1.6% | 24.8%    | 24.8%  | -2.1%        | -2.3% | -0.1%                       | 0.0%  | 0.0%                       | 0.0%  | 0.6%                                          | 0.6%  | 0.0%                         | -0.1% | -0.7%                                 | -0.5% | -2.2%     | -2.2% | -1.1%                   | -1.3% |
| Panama                           | -1.4%              | -1.4% | -1.8%              | -2.0% | -0.8%                        | -0.4% | -1.6%   | -1.5% | -0.8%                                         | -0.9% | -2.8%                       | -2.9% | -2.5%                     | -2.7% | 0.7%     | 0.9%   | -2.4%        | -2.5% | -2.4%                       | -2.4% | -0.1%                      | -0.1% | 2.6%                                          | 3.4%  | 0.7%                         | 0.7%  | 2.1%                                  | 1.6%  | -3.0%     | -3.0% | -2.6%                   | -2.5% |
| Paraguay                         | -2.2%              | -2.2% | -2.8%              | -2.8% | -2.4%                        | -2.5% | -3.3%   | -3.3% | -2.6%                                         | -2.6% | -2.8%                       | -2.8% | -2.6%                     | -2.7% | 23.7%    | 24.0%  | -2.8%        | -2.7% | -1.3%                       | -1.2% | 0.1%                       | 0.0%  | 0.2%                                          | 0.2%  | -0.1%                        | -0.2% | 0.6%                                  | 0.2%  | -2.6%     | -2.5% | -2.1%                   | -1.6% |
| Peru                             | -2.7%              | -2.7% | -3.0%              | -3.0% | -3.1%                        | -3.0% | -3.3%   | -3.3% | -1.2%                                         | -1.2% | -2.4%                       | -2.4% | -2.7%                     | -2.6% | 16.2%    | 16.1%  | -3.2%        | -3.2% | -2.5%                       | -2.2% | -0.8%                      | -0.8% | -2.2%                                         | -2.2% | -1.3%                        | -1.6% | -1.5%                                 | -1.3% | -3.1%     | -3.1% | -2.6%                   | -2.5% |
| Philippines                      | -2.3%              | -2.3% | -2.8%              | -2.8% | -2.4%                        | -2.3% | -3.2%   | -3.3% | -0.8%                                         | -1.1% | -2.5%                       | -2.5% | -2.3%                     | -2.2% | 17.8%    | 15.6%  | -2.6%        | -2.5% | -0.2%                       | -0.3% | -0.3%                      | -0.2% | 0.3%                                          | 0.2%  | -0.9%                        | -0.8% | -0.4%                                 | 0.1%  | -3.2%     | -3.2% | -0.9%                   | -0.7% |
| Saint Lucia                      | -1.4%              | -1.3% | -2.2%              | -2.5% | -1.6%                        | -1.8% |         |       | 0.0%                                          | -0.2% | -1.8%                       | -1.7% | -2.4%                     | -2.7% | -2.2%    | -2.7%  | -2.7%        | -2.9% | -0.6%                       | -1.1% | 0.0%                       | -0.1% | -2.6%                                         | -2.6% | -0.1%                        | -1.2% | -0.8%                                 | -0.6% | -2.6%     | -2.8% | -2.3%                   | -2.3% |
| Saint Vincent and the Grenadines | -1.4%              | -1.8% | -2.5%              | -2.6% | -1.8%                        | -1.9% |         |       | 1.5%                                          | 0.5%  | -1.0%                       | -1.8% | -2.5%                     | -2.7% | -2.1%    | -2.4%  | -2.8%        | -2.8% | -1.3%                       | -1.2% | 0.5%                       | 0.4%  | -2.9%                                         | -3.0% | 0.2%                         | -1.0% | -1.2%                                 | -0.9% | -2.9%     | -2.7% | -2.5%                   | -2.6% |
| Samoa                            | -1.8%              | -1.8% | -1.6%              | -1.8% | -2.6%                        | -2.5% |         |       | -0.8%                                         | -1.0% | -1.7%                       | -1.4% | -2.5%                     | -2.6% | 2.0%     | 2.2%   | -2.8%        | -3.0% | -0.5%                       | -0.3% | -0.1%                      | -0.2% | 0.0%                                          | -0.0% | -0.0%                        | -0.1% | -1.1%                                 | -1.2% | -2.3%     | -2.7% | -2.5%                   | -2.2% |
| South Africa                     | -2.1%              | -2.2% | -2.5%              | -2.5% | -2.4%                        | -2.4% | -1.3%   | -1.8% | 0.5%                                          | -0.1% | -2.5%                       | -2.6% | -2.4%                     | -2.5% | 2.8%     | 3.2%   | -2.6%        | -2.7% | -2.6%                       | -2.7% | -0.4%                      | -0.6% | -1.4%                                         | -1.4% | -1.1%                        | -1.2% | -0.7%                                 | -1.1% | -2.5%     | -3.1% | -2.8%                   | -2.7% |
| Suriname                         | -2.0%              | -2.1% | -2.6%              | -2.6% | -1.8%                        | -2.0% | -3.3%   | -3.3% | -0.4%                                         | -0.4% | -2.8%                       | -2.8% | -2.4%                     | -2.5% | -1.8%    | -2.2%  | -2.8%        | -2.8% | 1.2%                        | 0.0%  | -0.2%                      | -0.5% | -1.3%                                         | -1.3% | -0.2%                        | -0.4% | -0.7%                                 | -0.7% | -2.9%     | -3.0% | -2.3%                   | -2.4% |
| Syrian Arab Republic             | -2.7%              | -2.7% | -2.9%              | -2.8% | -2.6%                        | -2.6% | -3.3%   | -3.3% | -1.6%                                         | -1.8% | -2.9%                       | -3.0% | -2.6%                     | -2.7% | -0.2%    | -0.0%  | -3.0%        | -3.1% | -0.5%                       | -0.4% | 0.0%                       | 0.0%  | -1.5%                                         | -1.5% | -0.2%                        | -0.5% | -1.4%                                 | -1.6% | -3.1%     | -3.1% | -2.8%                   | -2.8% |
| Thailand                         | -2.4%              | -2.5% | -2.5%              | -2.8% | -2.8%                        | -2.8% | -3.3%   | -3.3% | 0.8%                                          | 0.3%  | -2.9%                       | -2.8% | -2.8%                     | -2.8% | -0.7%    | -0.6%  | -3.1%        | -3.0% | -2.5%                       | -2.4% | -0.1%                      | -0.1% | -2.5%                                         | -2.5% | -0.3%                        | -0.4% | -1.1%                                 | -2.2% | -2.6%     | -2.4% | -1.1%                   | -2.8% |
| Tokelau                          | -2.2%              | -2.2% | -2.1%              | -2.3% | -2.6%                        | -2.7% |         |       | -1.2%                                         | -1.5% | -2.4%                       | -2.5% | -2.5%                     | -2.6% | 25.2%    | 21.7%  | -3.0%        | -3.0% | -1.1%                       | -0.7% | -0.1%                      | -0.2% | -0.7%                                         | -0.9% | -0.1%                        | -0.2% | -1.2%                                 | -1.3% | -2.7%     | -2.6% | -2.5%                   | -2.5% |
| Tonga                            | -1.5%              | -1.5% | -2.0%              | -1.9% | -2.0%                        | -1.9% |         |       | -0.8%                                         | -0.8% | -1.3%                       | -1.4% | -1.7%                     | -1.7% | 5.8%     | 5.8%   | -2.4%        | -2.3% | -1.4%                       | -1.3% | -0.0%                      | -0.1% | -0.7%                                         | -0.7% | -0.0%                        | -0.1% | -0.9%                                 | -1.1% | -2.4%     | -2.5% | -1.7%                   | -1.6% |
| Tunisia                          | -2.9%              | -2.7% | -2.4%              | -2.1% | -3.1%                        | -3.0% |         |       | -1.5%                                         | -1.5% | -3.0%                       | -2.9% | -3.0%                     | -2.7% | 13.2%    | 12.8%  | -3.2%        | -3.1% | -2.3%                       | -2.3% | -0.1%                      | -0.1% | -1.8%                                         | -1.8% | -0.1%                        | -0.1% | -1.7%                                 | -1.8% | -3.1%     | -3.1% | -3.2%                   | -2.8% |
| Turkmenistan                     | -2.7%              | -2.7% | -3.1%              | -3.2% | -2.6%                        | -2.6% | -3.3%   | -3.3% | 1.7%                                          | 1.3%  | -2.6%                       | -2.7% | -2.2%                     | -2.3% | -2.1%    | -1.7%  | -2.8%        | -2.9% | -1.4%                       | -1.6% | 0.0%                       | -0.1% | -3.1%                                         | -2.5% | -2.3%                        | -2.0% | 0.9%                                  | 1.3%  | -3.2%     | -3.2% | -2.8%                   | -2.8% |
| Uzbekistan                       | -2.2%              | -2.3% | -3.2%              | -3.2% | -2.1%                        | -2.1% | -3.3%   | -3.3% | 2.6%                                          | 2.9%  | -2.5%                       | -2.6% | -2.5%                     | -2.6% | -2.0%    | -0.5%  | -2.4%        | -2.5% | -0.5%                       | -0.8% | -0.1%                      | -0.1% | -2.4%                                         | -3.0% | -2.3%                        | -2.3% | 3.6%                                  | 3.9%  | -3.2%     | -3.2% | -2.4%                   | -2.4% |
| Viet Nam                         | -2.6%              | -2.6% | -2.8%              | -3.0% | -2.7%                        | -2.7% | -3.2%   | -3.2% | -1.5%                                         | -1.6% | -3.0%                       | -3.0% | -2.3%                     | -2.1% | -3.1%    | -3.1%  | -2.9%        | -2.9% | -2.3%                       | -2.1% | -0.1%                      | -0.0% | -1.0%                                         | -1.2% | -0.4%                        | -0.5% | -2.2%                                 | -2.5% | -3.0%     | -2.9% | -2.8%                   | -2.5% |

|                          | <5 year            |       |                    |       |                              |       |         |       |                                               |       |                             |       |                           |       |          |       |              |       |                             |       |                            |       |                                               |       |                              |       |                                       |       |           |       |                         |       |
|--------------------------|--------------------|-------|--------------------|-------|------------------------------|-------|---------|-------|-----------------------------------------------|-------|-----------------------------|-------|---------------------------|-------|----------|-------|--------------|-------|-----------------------------|-------|----------------------------|-------|-----------------------------------------------|-------|------------------------------|-------|---------------------------------------|-------|-----------|-------|-------------------------|-------|
|                          | Total communicable |       | Enteric infections |       | Lower respiratory infections |       | Malaria |       | Neonatal sepsis and other neonatal infections |       | Vaccine Preventable disease |       | Meningitis & Encephalitis |       | HIV/AIDS |       | Tuberculosis |       | Neglected Tropical diseases |       | Infectious skin conditions |       | Sexually transmitted infections excluding HIV |       | Upper respiratory infections |       | Other unspecified infectious diseases |       | Hepatitis |       | Rheumatic heart disease |       |
|                          | Female             | Male  | Female             | Male  | Female                       | Male  | Female  | Male  | Female                                        | Male  | Female                      | Male  | Female                    | Male  | Female   | Male  | Female       | Male  | Female                      | Male  | Female                     | Male  | Female                                        | Male  | Female                       | Male  | Female                                | Male  | Female    | Male  | Female                  | Male  |
| American Samoa           | -1.3%              | -1.3% | -0.7%              | -0.9% | -1.7%                        | -1.7% |         |       | -0.2%                                         | -1.7% | -1.5%                       | -1.5% | -1.2%                     | -1.7% | 8.1%     | 8.3%  | -2.3%        | -2.6% | 1.5%                        | -0.3% | 0.0%                       | -0.0% | -1.2%                                         | -1.1% | 0.1%                         | -0.1% | -0.7%                                 | -0.4% | -1.4%     | -0.9% | -1.6%                   | -1.8% |
| Antigua and Barbuda      | -1.1%              | -0.6% | -1.7%              | -1.1% | -0.7%                        | 0.1%  |         |       | -0.8%                                         | -0.6% | 0.0%                        | -0.4% | -2.0%                     | -1.9% | -1.1%    | -1.0% | -2.0%        | -1.6% | -0.7%                       | 0.0%  | 0.2%                       | 0.6%  | -2.7%                                         | -2.5% | -0.1%                        | -0.0% | -0.7%                                 | 0.3%  | -2.7%     | -2.3% | -1.4%                   | -0.9% |
| Argentina                | -2.2%              | -2.2% | -2.6%              | -2.5% | -2.3%                        | -2.2% | -3.3%   | -3.3% | -1.9%                                         | -2.0% | -1.8%                       | -1.7% | -2.6%                     | -2.6% | 2.7%     | 2.5%  | -3.0%        | -3.1% | -1.9%                       | -1.8% | 0.0%                       | 0.1%  | -2.3%                                         | -2.3% | -0.2%                        | -0.1% | -1.0%                                 | -0.6% | -3.0%     | -2.6% | -2.4%                   | -2.5% |
| Bahamas                  | -1.6%              | -1.6% | -2.1%              | -2.1% | -2.1%                        | -1.8% |         |       | -0.8%                                         | -1.5% | -0.6%                       | -0.8% | -2.5%                     | -2.6% | 0.5%     | -0.9% | -2.7%        | -2.6% | -0.2%                       | -0.5% | -0.1%                      | -0.1% | -2.7%                                         | -2.4% | -0.8%                        | -0.0% | -0.3%                                 | -0.0% | -2.8%     | -2.6% | -1.9%                   | -1.4% |
| Bahrain                  | -2.8%              | -2.3% | -1.3%              | -1.2% | -2.6%                        | -2.7% |         |       | -0.1%                                         | -1.9% | -3.0%                       | -3.1% | -2.7%                     | -2.7% | -2.6%    | -2.6% | -2.8%        | -2.8% | 1.6%                        | -1.5% | -1.3%                      | -0.7% | -0.6%                                         | -0.6% | -0.0%                        | -0.0% | -1.7%                                 | -1.5% | -2.7%     | -2.3% | -2.1%                   | -2.7% |
| Barbados                 | -0.7%              | -1.1% | -1.4%              | -1.7% | -1.2%                        | -1.5% |         |       | 0.6%                                          | 0.0%  | -1.7%                       | -1.5% | -2.3%                     | -2.6% | -1.8%    | -2.1% | -2.4%        | -2.4% | 3.7%                        | 2.3%  | 0.0%                       | -0.3% | -2.5%                                         | -2.6% | -0.3%                        | -0.1% | -0.2%                                 | 0.1%  | -2.7%     | -2.6% | -1.9%                   | -1.0% |
| Belarus                  | -2.3%              | -2.4% | -2.1%              | -2.2% | -3.0%                        | -3.0% |         |       | -0.9%                                         | -1.2% | -2.5%                       | -2.1% | -2.0%                     | -2.1% | -0.3%    | 1.4%  | -2.4%        | -2.5% | -1.4%                       | -1.4% | -0.0%                      | -0.0% | -2.9%                                         | -2.8% | -1.2%                        | -1.5% | 2.8%                                  | 3.1%  | -2.1%     | -1.5% | -1.2%                   | -1.5% |
| Bosnia and Herzegovina   | -1.7%              | -1.7% | -1.8%              | -1.6% | -2.6%                        | -2.4% |         |       | 0.0%                                          | -0.3% | -1.6%                       | -1.6% | -2.1%                     | -2.3% | -1.5%    | -1.6% | -2.8%        | -2.8% | -1.6%                       | -1.8% | 0.0%                       | 0.0%  | -1.6%                                         | -1.5% | -0.7%                        | -0.2% | -1.3%                                 | -1.1% | -1.7%     | -2.0% | -0.7%                   | -2.3% |
| Bulgaria                 | -2.3%              | -2.3% | -1.3%              | -1.6% | -2.6%                        | -2.6% |         |       | 14.6%                                         | 14.4% | 6.2%                        | 9.4%  | -2.2%                     | -2.2% | 0.3%     | -0.1% | -2.6%        | -2.6% | -2.2%                       | -2.5% | -0.0%                      | -0.1% | -2.9%                                         | -1.9% | -0.8%                        | -1.1% | -1.5%                                 | -1.5% | -1.8%     | -1.2% | -2.9%                   | -3.0% |
| Chile                    | -2.6%              | -2.7% | -2.2%              | -2.4% | -3.0%                        | -3.1% |         |       | -1.7%                                         | -1.9% | 1.7%                        | 1.6%  | -2.8%                     | -2.8% | 2.9%     | 1.1%  | -3.8%        | -3.0% | -2.4%                       | -2.3% | 0.0%                       | -0.2% | -3.0%                                         | -2.8% | -0.6%                        | -0.5% | -0.4%                                 | -0.3% | -3.0%     | -2.8% | -2.6%                   | -2.5% |
| Cook Islands             | -2.6%              | -2.6% | -0.9%              | -1.0% | -3.1%                        | -3.1% |         |       | -2.0%                                         | -2.2% | -2.6%                       | -2.4% | -2.7%                     | -2.8% | 25.7%    | 29.5% | -3.1%        | -3.0% | -3.1%                       | -3.2% | -0.1%                      | -0.1% | -1.4%                                         | -1.3% | 0.0%                         | -0.1% | -1.1%                                 | -1.3% | -1.4%     | -1.9% | -3.1%                   | -3.0% |
| Croatia                  | -1.4%              | -1.5% | -0.4%              | -1.1% | -2.8%                        | -2.9% |         |       | 7.6%                                          | 7.3%  | -1.0%                       | -0.5% | -2.7%                     | -2.7% | 6.3%     | -1.1% | -2.6%        | -3.0% | -1.3%                       | -1.3% | -0.0%                      | -0.0% | -3.0%                                         | -3.0% | -0.1%                        | -0.0% | -1.1%                                 | -1.0% | -0.9%     | -1.6% | -1.8%                   | -1.8% |
| Dominica                 | 0.3%               | 0.2%  | -1.4%              | -1.6% | 1.0%                         | 1.0%  |         |       | 1.0%                                          | 0.8%  | 5.6%                        | 6.6%  | -1.2%                     | -1.4% | 1.2%     | 1.4%  | -1.6%        | -1.2% | 1.0%                        | -0.3% | 0.2%                       | 0.3%  | -0.1%                                         | 0.0%  | -0.5%                        | -0.2% | 0.6%                                  | 2.1%  | -2.6%     | -2.4% | -0.9%                   | -0.7% |
| Georgia                  | -2.8%              | -2.8% | -2.8%              | -2.9% | -3.1%                        | -3.1% | -3.3%   | -3.3% | 3.0%                                          | 2.1%  | 0.9%                        | 0.7%  | -2.0%                     | -2.3% | 11.0%    | 71.8% | -2.5%        | -2.7% | 0.2%                        | 0.6%  | -0.0%                      | 0.0%  | -2.3%                                         | 2.0%  | -0.6%                        | -0.9% | 1.2%                                  | 2.0%  | -2.3%     | -1.0% | -0.7%                   | -0.5% |
| Greece                   | -1.1%              | -1.5% | 0.3%               | 0.2%  | -1.0%                        | -1.4% |         |       | -3.0%                                         | -3.0% | -3.0%                       | -2.7% | -2.0%                     | -2.0% | -2.2%    | -2.1% | -2.4%        | -2.6% | -1.3%                       | -1.1% | -0.0%                      | -0.0% | -2.9%                                         | -3.1% | -0.1%                        | -0.1% | -0.6%                                 | -0.4% | 1.5%      | 1.5%  | -0.6%                   | -0.9% |
| Greenland                | -2.3%              | -2.4% | 0.2%               | 0.3%  | -2.8%                        | -2.9% |         |       | -0.2%                                         | -1.4% | -2.3%                       | -2.4% | -2.9%                     | -2.7% | 6.3%     | 6.2%  | -3.1%        | -3.0% | -0.9%                       | -0.9% | 0.0%                       | -0.1% | -0.9%                                         | -1.2% | -0.0%                        | -0.0% | -1.9%                                 | -2.2% | -3.0%     | -3.1% | -3.0%                   | -3.5% |
| Hungary                  | -2.2%              | -2.4% | 0.2%               | 0.3%  | -2.8%                        | -2.9% |         |       | -1.8%                                         | -0.9% | -2.0%                       | -1.8% | -2.8%                     | -2.8% | -2.7%    | -2.8% | -2.4%        | -2.7% | -1.2%                       | -1.3% | 0.0%                       | 0.0%  | -3.3%                                         | -3.2% | -2.4%                        | -2.5% | -1.3%                                 | -1.3% | -2.3%     | -2.5% | -0.4%                   | -1.9% |
| Israel                   | -1.8%              | -1.7% | 0.1%               | 0.3%  | -2.7%                        | -2.7% |         |       | -2.1%                                         | -1.8% | -0.3%                       | -0.1% | -2.6%                     | -2.7% | -2.5%    | -2.3% | -2.8%        | -3.0% | -1.6%                       | -1.4% | -0.0%                      | -0.1% | -3.0%                                         | -3.2% | -0.1%                        | -0.0% | -0.4%                                 | -0.0% | -3.1%     | -3.1% | -2.6%                   | -2.5% |
| Italy                    | -1.6%              | -1.8% | 0.6%               | 0.4%  | -2.9%                        | -2.9% |         |       | -1.3%                                         | -1.1% | -2.9%                       | -2.7% | -2.5%                     | -2.6% | -2.4%    | -2.7% | -2.8%        | -3.0% | -1.7%                       | -1.3% | 0.0%                       | 0.0%  | -3.1%                                         | -3.1% | -0.5%                        | -0.6% | -0.7%                                 | -0.6% | -0.3%     | -0.6% | -2.4%                   | -2.5% |
| Jordan                   | -2.2%              | -2.1% | -2.2%              | -2.2% | -2.2%                        | -2.3% |         |       | -1.5%                                         | -1.1% | -2.7%                       | -2.8% | -2.1%                     | -2.1% | 5.0%     | 5.0%  | -2.9%        | -3.0% | -2.0%                       | -2.1% | -0.1%                      | -0.0% | -0.9%                                         | -0.8% | -0.1%                        | -0.1% | -1.7%                                 | -1.8% | -2.6%     | -2.9% | -2.5%                   | -2.2% |
| Kazakhstan               | -2.8%              | -2.8% | -3.2%              | -3.2% | -2.9%                        | -2.9% |         |       | 0.4%                                          | -0.2% | -2.0%                       | -1.9% | -2.2%                     | -2.3% | 1.9%     | 0.0%  | -2.9%        | -3.1% | -1.4%                       | -1.2% | 0.0%                       | -0.0% | -3.0%                                         | -2.1% | -1.7%                        | -1.1% | 4.0%                                  | 5.7%  | -3.1%     | -3.1% | -2.7%                   | -2.8% |
| Lebanon                  | -2.4%              | -2.4% | -1.9%              | -1.8% | -2.8%                        | -2.7% |         |       | -1.3%                                         | -1.3% | -2.8%                       | -2.9% | -2.6%                     | -2.5% | 0.2%     | 0.3%  | -3.0%        | -3.0% | -2.3%                       | -2.5% | -0.0%                      | -0.0% | -0.5%                                         | -0.4% | -0.0%                        | -0.0% | -1.6%                                 | -1.8% | -2.9%     | -2.7% | -2.8%                   | -2.6% |
| Libya                    | -2.6%              | -2.7% | -2.6%              | -2.6% | -2.7%                        | -2.9% |         |       | -1.6%                                         | -1.8% | -2.9%                       | -3.0% | -2.7%                     | -2.7% | 6.7%     | 6.1%  | -2.9%        | -2.7% | -1.5%                       | -1.7% | 0.0%                       | 0.0%  | -0.4%                                         | -0.6% | -0.0%                        | -0.1% | -1.2%                                 | -1.6% | -2.9%     | -2.9% | -2.6%                   | -2.5% |
| Malaysia                 | -2.1%              | -2.1% | -1.8%              | -2.0% | -2.7%                        | -2.6% | -3.3%   | -3.3% | -1.5%                                         | -1.6% | -2.9%                       | -2.9% | -2.4%                     | -2.4% | 78.8%    | 81.6% | -2.8%        | -2.9% | -2.1%                       | -1.9% | -0.0%                      | -0.0% | -1.7%                                         | -1.7% | -0.1%                        | -0.3% | -0.5%                                 | -0.5% | -2.4%     | -2.3% | -2.6%                   | -2.8% |
| Malta                    | -1.2%              | -1.5% | 0.5%               | 0.3%  | -1.9%                        | -2.0% |         |       | -0.5%                                         | -1.0% | -2.3%                       | -2.2% | -2.1%                     | -2.3% | -1.8%    | -2.4% | -2.1%        | -2.5% | -1.8%                       | -1.9% | 0.0%                       | 0.0%  | -3.0%                                         | -3.0% | -0.4%                        | -0.7% | -0.9%                                 | -0.8% | -1.9%     | -2.1% | -0.8%                   | -1.8% |
| Mauritius                | -1.6%              | -1.3% | -2.3%              | -2.4% | -2.2%                        | -1.9% |         |       | -0.6%                                         | 0.6%  | -1.4%                       | -1.6% | -2.0%                     | -2.0% | 10.8%    | 12.0% | -2.1%        | -2.3% | -0.9%                       | -0.9% | 0.1%                       | 0.1%  | -3.2%                                         | -2.5% | -0.1%                        | -0.2% | -0.8%                                 | -0.7% | -1.7%     | -2.2% | -2.5%                   | -2.4% |
| Montenegro               | -2.2%              | -1.9% | -0.8%              | -1.0% | -2.9%                        | -2.7% |         |       | -1.1%                                         | -1.1% | -1.9%                       | -1.6% | -2.6%                     | -2.5% | 6.9%     | 6.4%  | -3.0%        | -2.9% | -0.9%                       | -1.1% | -0.0%                      | -0.0% | -0.6%                                         | -0.6% | -0.8%                        | -0.1% | -1.5%                                 | -1.7% | -2.2%     | -1.9% | -2.6%                   | -2.4% |
| Niue                     | -0.8%              | -0.8% | -1.1%              | -1.1% | -1.0%                        | -1.0% |         |       | -0.4%                                         | -0.7% | -1.3%                       | -1.1% | -2.0%                     | -1.9% | 24.2%    | 26.2% | -2.2%        | -2.2% | 0.1%                        | -0.2% | -0.0%                      | -0.1% | 0.5%                                          | 0.5%  | 0.0%                         | -0.1% | -0.7%                                 | -0.2% | -2.0%     | -1.8% | -1.8%                   | -0.3% |
| North Macedonia          | -2.9%              | -2.8% | -3.2%              | -3.2% | -3.1%                        | -3.0% |         |       | 12.1%                                         | 16.3% | -1.4%                       | -1.2% | -2.9%                     | -2.9% | 27.0%    | 27.3% | -3.2%        | -3.2% | -1.4%                       | -1.2% | -0.2%                      | -0.2% | -0.4%                                         | -0.4% | -0.1%                        | -0.7% | -2.0%                                 | -2.2% | -2.1%     | -1.8% | -2.4%                   | -2.7% |
| Northern Mariana Islands | -0.3%              | -0.5% | 0.8%               | 0.4%  | -0.9%                        | -1.1% |         |       | 1.6%                                          | -0.3% | -0.4%                       | 0.3%  | 0.2%                      | 0.1%  | 7.5%     | 7.5%  | -1.9%        | -2.3% | 0.7%                        | 0.3%  | 0.2%                       | 0.2%  | -0.4%                                         | -0.6% | 0.1%                         | -0.0% | 0.7%                                  | 0.4%  | 0.4%      | -0.4% | -0.0%                   | 0.7%  |
| Oman                     | -2.7%              | -2.6% | -2.5%              | -2.6% | -2.8%                        | -2.6% | -3.3%   | -3.3% | -1.3%                                         | -1.3% | -3.1%                       | -3.1% | -2.3%                     | -1.9% | 3.6%     | 3.6%  | -3.1%        | -3.1% | -2.3%                       | -2.4% | -0.2%                      | -0.3% | -1.7%                                         | -1.7% | -0.4%                        | -0.1% | -2.0%                                 | -2.1% | -2.9%     | -2.8% | -2.8%                   | -2.5% |
| Palau                    | -1.8%              | -1.9% | -1.3%              | -1.4% | -2.1%                        | -2.3% |         |       | -0.9%                                         | -1.6% | -1.9%                       | -1.9% | -2.5%                     | -2.4% | 23.7%    | 23.3% | -2.6%        | -2.6% | 0.3%                        | -0.2% | 0.0%                       | 0.0%  | 0.3%                                          | 0.1%  | 0.1%                         | -0.1% | -0.9%                                 | -1.1% | -2.2%     | -2.6% | -2.3%                   | -2.0% |
| Poland                   | -2.5%              | -2.6% | -1.2%              | -1.3% | -2.9%                        | -2.9% |         |       | -2.6%                                         | -2.7% | -2.2%                       | -2.1% | -3.0%                     | -3.1% | 6.0%     | 4.4%  | -2.9%        | -3.0% | -1.5%                       | -1.5% | -0.2%                      | -0.2% | -3.3%                                         | -3.2% | -1.3%                        | -1.6% | -1.7%                                 | -1.6% | -1.7%     | -1.7% | -2.9%                   | -2.9% |
| Portugal                 | -2.3%              | -2.5% | -1.3%              | -1.9% | -3.0%                        | -3.0% |         |       | -2.3%                                         | -2.3% | -2.4%                       | -2.7% | -3.0%                     | -3.0% | 1.0%     | -0.6% | -3.1%        | -3.1% | -2.3%                       | -2.3% | -0.0%                      | -0.0% | -3.3%                                         | -3.1% | -1.4%                        | -1.4% | -1.5%                                 | -1.5% | -2.8%     | -3.0% | -2.9%                   | -2.7% |
| Republic of Moldova      | -2.2%              | -2.2% | -2.7%              | -2.9% | -2.5%                        | -2.4% |         |       | -0.6%                                         | -0.6% | -1.3%                       | -1.2% | -2.8%                     | -2.9% | 3.2%     | -0.8% | -2.3%        | -2.7% | -1.8%                       | -1.7% | -0.2%                      | -0.5% | -3.3%                                         | -1.9% | -1.9%                        | -1.1% | 3.9%                                  | 3.7%  | -3.3%     | -3.3% | -1.8%                   | -1.6% |
| Romania                  | -2.8%              | -2.7% | -2.7%              | -2.7% | -2.8%                        | -2.7% |         |       | -1.5%                                         | -1.1% | -1.2%                       | -2.2% | -2.9%                     | -3.0% | -3.2%    | -3.2% | -2.6%        | -2.8% | -1.8%                       | -2.1% | -0.1%                      | -0.2% | -2.7%                                         | -1.4% | -2.1%                        | -2.1% | -2.6%                                 | -2.5% | -3.3%     | -3.3% | -1.2%                   | -1.8% |
| Russian Federation       | -2.0%              | -2.2% | -2.0%              | -2.3% | -2.6%                        | -2.7% |         |       | -0.3%                                         | -0.7% | -2.4%                       | -2.1% | -2.3%                     | -2.5% | 4.2%     | 1.8%  | -2.3%        | -2.7% | -1.2%                       | -1.2% | -0.2%                      | -0.2% | -1.8%                                         | -1.3% | -1.9%                        | -2.0% | -0.9%                                 | -0.8% | -2.5%     | -2.1% | -2.0%                   | -2.5% |
| Saint Kitts and Nevis    | -1.8%              | -1.7% | -2.5%              | -2.6% | -1.9%                        | -1.8% |         |       | -0.0%                                         | -0.0% | -2.2%                       | -1.6% | -2.6%                     | -2.7% | 8.1%     | 8.0%  | -2.9%        | -2.8% | -1.0%                       | -1.1% | -0.0%                      | -0.4% | -2.9%                                         | -2.7% | -0.4%                        | -1.2% | -1.0%                                 | -0.6% | -3.1%     | -2.6% | -2.9%                   | -2.7% |
| Saudi Arabia             | -3.0%              | -3.0% | -3.0%              | -3.0% | -3.1%                        | -3.1% | -3.3%   | -3.3% | -2.5%                                         | -2.5% | -3.3%                       | -3.3% | -2.8%                     | -2.8% | 1.7%     | 1.5%  | -3.2%        | -3.2% | -2.6%                       | -2.7% | -0.0%                      | -0.0% | -2.0%                                         | -2.0% | -0.1%                        | -0.1% | -1.6%                                 | -1.8% | -3.1%     | -3.1% | -3.2%                   | -3.2% |
| Serbia                   | -2.7%              | -2.8% | -0.8%              | -0.6% | -3.1%                        | -3.2% |         |       | -2.7%                                         | -2.9% | -2.4%                       | -2.4% | -2.9%                     | -3.1% | 3.2%     | 1.6%  | -3.2%        | -3.2% | -2.2%                       | -2.5% | -0.1%                      | -0.0% | -1.4%                                         | -1.8% | -0.1%                        | -0.4% | -2.0%                                 | -2.4% | -2.7%     | -3.0% | -2.9%                   | -3.0% |
| Seychelles               | -1.5%              | -1.6% | -1.0%              | -1.2% | -0.4%                        | -0.5% |         |       | -0.6%                                         | -1.1% | -2.2%                       | -2.3% | -3.1%                     | -3.1% | 0.7%     | 0.8%  | -1.0%        | -1.6% | -1.0%                       | -0.6% | 0.0%                       | 0.0%  | -0.4%                                         | -0.5% | -0.1%                        | -0.3% | 0.2%                                  | 1.7%  | -2.6%     | -2.6% | -2.4%                   | -2.6% |
| Spain                    | -1.6%              | -1.8% | -0.4%              | -0.5% | -2.7%                        | -2.8% |         |       | -1.3%                                         | -1.3% | -0.8%                       | -1.0% | -2.8%                     | -2.8% | -2.7%    | -2.8% | -2.8%        | -3.1% | -1.1%                       | -1.9% | 0.0%                       | 0.0%  | -3.2%                                         | -3.2% | -0.2%                        | -0.2% | -0.7%                                 | -0.8% | -1.8%     | -2.3% | -2.1%                   | -2.5% |
| Sri Lanka                | -2.5%              | -2.4% | -2.6%              | -2.6% | -2.7%                        | -2.7% | -3.3%   | -3.3% | -0.7%                                         | -0.8% | -3.1%                       | -3.1% | -2.6%                     | -2.6% | -0.4%    | -0.4% | -2.9%        | -2.9% | -1.3%                       | -1.2% | -0.0%                      | -0.0% | -1.6%                                         | -1.6% | -0.4%                        | -0.3% | -1.9%                                 | -1.8% | -2.4%     | -2.1% | -2.6%                   | -2.5% |
| Trinidad and Tobago      | -1.5%              | -1.6% | -1.9%              | -1.9% | -2.2%                        | -2.1% |         |       | -0.5%                                         | -0.8% | -1.2%                       | -1.4% | -2.4%                     | -2.6% | 2.7%     | 0.6%  | -2.5%        | -2.1% | -1.1%                       | 0.3%  | -0.0%                      | -0.0% | -2.8%                                         | -1.2% | -0.1%                        | -0.1% | -0.1%                                 | -0.1% | -2.8%     | -2.6% | -2.0%                   | -2.0% |
| Turkey                   | -3.1%              | -3.0% | -2.6%              | -2.6% | -3.2%                        | -3.2% | -3.3%   | -3.3% | -1.6%                                         | -1.6% | -3.2%                       | -3.2% | -3.1%                     | -3.0% | 45.7%    | 46.2% | -3.2%        | -3.3% | -2.5%                       | -2.6% | -0.2%                      | -0.3% | -1.8%                                         | -1.7% | -0.6%                        | -0.4% | -2.0%                                 | -1.9% | -3.1%     | -3.1% | -2.8%                   | -2.0% |
| Ukraine                  | -1.1%              | -1.6% | -1.4%              | -1.6% | -2.0%                        | -2.5% |         |       | -0.2%                                         | -0.4% |                             |       |                           |       |          |       |              |       |                             |       |                            |       |                                               |       |                              |       |                                       |       |           |       |                         |       |

|                            |       | <5 year            |       |                    |       |                              |       |         |       |                                               |       |                             |       |                           |       |          |       |              |       |                             |       |                            |       |                                               |       |                              |       |                                       |       |           |       |                         |  |
|----------------------------|-------|--------------------|-------|--------------------|-------|------------------------------|-------|---------|-------|-----------------------------------------------|-------|-----------------------------|-------|---------------------------|-------|----------|-------|--------------|-------|-----------------------------|-------|----------------------------|-------|-----------------------------------------------|-------|------------------------------|-------|---------------------------------------|-------|-----------|-------|-------------------------|--|
|                            |       | Total communicable |       | Enteric infections |       | Lower respiratory infections |       | Malaria |       | Neonatal sepsis and other neonatal infections |       | Vaccine Preventable disease |       | Meningitis & Encephalitis |       | HIV/AIDS |       | Tuberculosis |       | Neglected Tropical diseases |       | Infectious skin conditions |       | Sexually transmitted infections excluding HIV |       | Upper respiratory infections |       | Other unspecified infectious diseases |       | Hepatitis |       | Rheumatic heart disease |  |
|                            |       | Female             | Male  | Female             | Male  | Female                       | Male  | Female  | Male  | Female                                        | Male  | Female                      | Male  | Female                    | Male  | Female   | Male  | Female       | Male  | Female                      | Male  | Female                     | Male  | Female                                        | Male  | Female                       | Male  | Female                                | Male  | Female    | Male  |                         |  |
| Andorra                    | -2.0% | -1.9%              | -0.0% | -0.3%              | -2.7% | -2.7%                        |       |         | -1.6% | -1.7%                                         | -3.1% | -3.1%                       | -2.4% | -2.7%                     | -2.2% | -2.2%    | -2.9% | -2.9%        | -1.5% | -1.3%                       | 0.0%  | 0.0%                       | -1.2% | -1.0%                                         | -0.3% | -0.2%                        | -1.8% | -2.0%                                 | -2.8% | -2.9%     | -2.9% | -2.3%                   |  |
| Australia                  | -1.3% | -1.6%              | 0.6%  | 0.6%               | -2.1% | -2.1%                        |       |         | -2.3% | -2.7%                                         | -0.5% | -0.1%                       | -2.4% | -2.6%                     | -2.2% | -2.6%    | -1.3% | -1.1%        | 0.0%  | 0.0%                        | -3.2% | -2.9%                      | -0.3% | -0.3%                                         | 0.1%  | -0.5%                        | -1.2% | -0.5%                                 | -2.1% | -2.0%     |       |                         |  |
| Austria                    | -1.2% | -1.6%              | 0.8%  | 0.7%               | -2.8% | -2.8%                        |       |         | 1.1%  | -0.8%                                         | 1.9%  | 1.5%                        | -2.4% | -2.5%                     | -1.7% | -2.4%    | -2.7% | -2.5%        | -1.7% | -1.6%                       | 0.0%  | -0.0%                      | -3.0% | -3.1%                                         | -0.3% | -0.6%                        | 0.6%  | 0.0%                                  | -1.7% | -1.1%     | -2.4% | -2.2%                   |  |
| Belgium                    | -1.0% | -1.4%              | 0.4%  | 0.3%               | -2.2% | -2.2%                        |       |         | -1.2% | -2.1%                                         | -2.0% | -2.0%                       | -2.1% | -2.1%                     | -2.4% | -2.1%    | -2.7% | -2.8%        | -1.8% | -1.3%                       | 0.0%  | 0.0%                       | -3.1% | -2.7%                                         | -0.3% | -0.2%                        | 0.1%  | 0.0%                                  | -2.7% | -2.8%     | -0.5% | -1.6%                   |  |
| Bermuda                    | -1.5% | -2.0%              | -0.7% | -1.8%              | -1.7% | -2.4%                        |       |         | -1.3% | -0.8%                                         | -0.6% | -0.6%                       | 2.5%  | -2.9%                     | -2.1% | -2.3%    | -2.3% | -2.3%        | -1.1% | -0.9%                       | 0.1%  | -0.2%                      | -2.9% | -2.8%                                         | -0.1% | -0.1%                        | -1.3% | -1.4%                                 | -2.4% | -0.9%     | -2.9% | -2.7%                   |  |
| Brunei Darussalam          | -0.4% | -0.4%              | 0.3%  | 0.0%               | -0.4% | -0.4%                        |       |         | 0.7%  | 0.6%                                          | -1.8% | -2.1%                       | -1.8% | -1.2%                     | 9.6%  | 10.0%    | -2.4% | -2.5%        | -1.1% | -0.9%                       | 0.0%  | 0.0%                       | -0.0% | -0.1%                                         | -0.4% | -0.0%                        | 0.7%  | 1.3%                                  | -2.0% | -1.4%     | -2.6% | -2.2%                   |  |
| Canada                     | -0.6% | -0.8%              | 1.6%  | 1.3%               | -2.0% | -2.1%                        |       |         | -0.2% | -0.9%                                         | 0.1%  | -0.2%                       | -2.2% | -1.9%                     | 0.3%  | -2.5%    | -2.1% | -2.3%        | -1.1% | -0.7%                       | 0.1%  | 0.1%                       | -2.9% | -2.8%                                         | -0.2% | -0.2%                        | -0.3% | -0.2%                                 | -1.7% | -1.7%     | -1.6% | -1.4%                   |  |
| Cyprus                     | -2.3% | -2.3%              | -0.0% | -0.1%              | -3.0% | -3.0%                        |       |         | -2.3% | -2.4%                                         | -3.2% | -3.2%                       | -3.0% | -3.0%                     | 2.4%  | 2.0%     | -2.8% | -3.1%        | -2.3% | -2.4%                       | 0.0%  | -0.0%                      | -2.0% | -2.0%                                         | -0.0% | -0.0%                        | -1.8% | -2.3%                                 | -2.4% | -2.4%     | -2.5% | -3.0%                   |  |
| Czechia                    | -1.7% | -1.8%              | 0.2%  | 0.3%               | -2.8% | -2.7%                        |       |         | 3.1%  | 3.2%                                          | 2.5%  | 1.8%                        | -2.6% | -2.6%                     | 6.9%  | 3.9%     | -2.1% | -2.6%        | -1.4% | -1.4%                       | -0.0% | -0.0%                      | -3.0% | -3.0%                                         | -1.6% | -1.4%                        | -1.2% | -1.5%                                 | -1.2% | -2.6%     | -2.7% | -2.6%                   |  |
| Denmark                    | -1.6% | -1.7%              | 0.2%  | 0.1%               | -2.6% | -2.6%                        |       |         | -0.5% | -1.5%                                         | -1.9% | -1.9%                       | -3.0% | -3.0%                     | 6.5%  | 5.8%     | -2.8% | -2.8%        | -1.6% | -1.2%                       | 0.0%  | 0.0%                       | -2.8% | -2.9%                                         | -0.1% | -0.2%                        | -0.7% | -0.4%                                 | -2.5% | -1.2%     | -2.1% | -2.1%                   |  |
| Estonia                    | -2.1% | -2.6%              | -0.2% | -1.3%              | -2.6% | -2.6%                        |       |         | -2.2% | -2.8%                                         | -3.0% | -2.9%                       | -2.8% | -2.9%                     | 21.9% | 34.4%    | -2.6% | -2.9%        | -1.5% | -1.6%                       | -0.0% | -0.2%                      | -2.9% | -2.6%                                         | -0.5% | -0.6%                        | 1.9%  | 0.6%                                  | -3.0% | -3.1%     | -1.7% | -1.8%                   |  |
| Finland                    | -1.4% | -1.5%              | -0.3% | -0.3%              | -2.9% | -2.9%                        |       |         | -1.6% | -1.3%                                         | -0.8% | -0.3%                       | -2.7% | -2.7%                     | -2.9% | -2.3%    | -2.0% | -3.0%        | -1.8% | -1.6%                       | 0.1%  | -0.1%                      | -3.0% | -3.1%                                         | -0.1% | -0.0%                        | -1.3% | -1.3%                                 | -2.4% | -2.0%     | -1.5% | -1.8%                   |  |
| France                     | -1.4% | -1.7%              | -1.0% | -1.2%              | -2.3% | -2.5%                        |       |         | -1.4% | -1.5%                                         | -1.7% | -1.6%                       | -2.3% | -2.4%                     | -2.8% | -3.0%    | -2.6% | -2.9%        | -1.8% | -1.8%                       | 0.0%  | -0.0%                      | -3.0% | -3.0%                                         | -0.9% | -1.2%                        | -1.1% | -1.1%                                 | -2.1% | -2.6%     | -1.5% | -1.7%                   |  |
| Germany                    | -1.2% | -1.6%              | 0.3%  | 0.2%               | -2.4% | -2.5%                        |       |         | -1.5% | -1.9%                                         | -1.5% | -1.8%                       | -2.7% | -2.8%                     | -2.6% | -2.7%    | -2.7% | -2.9%        | -1.6% | -1.5%                       | 0.0%  | 0.0%                       | -2.9% | -3.0%                                         | -0.6% | -0.8%                        | -1.5% | -1.2%                                 | -2.6% | -2.9%     | -2.0% | -2.2%                   |  |
| Guam                       | -0.4% | -0.2%              | 0.5%  | 0.0%               | -0.5% | -0.2%                        |       |         | -0.4% | 0.2%                                          | -0.6% | -0.7%                       | -0.4% | -0.4%                     | 11.5% | 11.6%    | -1.5% | -1.6%        | -0.2% | -0.3%                       | 0.3%  | 0.2%                       | -0.4% | -0.6%                                         | 0.0%  | -0.0%                        | 0.0%  | 0.1%                                  | 0.2%  | 0.0%      | -0.7% | 0.0%                    |  |
| Iceland                    | -1.5% | -1.5%              | 0.1%  | 0.0%               | -2.4% | -2.4%                        |       |         | -1.7% | -2.4%                                         | 2.4%  | 2.0%                        | -2.8% | -2.6%                     | -2.1% | -2.3%    | -2.8% | -2.6%        | -1.8% | -1.1%                       | 0.1%  | 0.1%                       | -3.0% | -3.2%                                         | -0.2% | -0.4%                        | -1.1% | -0.9%                                 | -1.4% | -0.4%     | -1.4% | -1.5%                   |  |
| Ireland                    | -1.2% | -1.5%              | 0.8%  | 0.7%               | -2.6% | -2.7%                        |       |         | 1.4%  | 0.3%                                          | -2.5% | -2.4%                       | -2.7% | -2.8%                     | -1.0% | -2.4%    | -2.6% | -2.9%        | -1.9% | -1.5%                       | -0.0% | -0.0%                      | -3.1% | -3.1%                                         | -0.1% | -0.1%                        | -0.6% | -1.0%                                 | -1.4% | -1.7%     | -1.6% | -2.1%                   |  |
| Japan                      | -1.4% | -1.6%              | -1.1% | -1.2%              | -2.0% | -2.1%                        |       |         | -1.9% | -1.8%                                         | -2.6% | -2.7%                       | -2.2% | -2.4%                     | 3.8%  | 4.3%     | -2.3% | -2.8%        | -1.5% | -1.4%                       | 0.0%  | 0.0%                       | -3.0% | -3.0%                                         | -0.4% | -0.4%                        | -0.5% | -0.5%                                 | -1.8% | -2.1%     | -1.3% | -1.6%                   |  |
| Kuwait                     | -2.1% | -1.9%              | -1.8% | -1.5%              | -2.4% | -2.3%                        |       |         | -1.7% | -1.7%                                         | -2.8% | -2.8%                       | -2.3% | -2.2%                     | 0.1%  | -2.5%    | -2.9% | -2.8%        | -1.3% | -1.3%                       | -0.0% | -0.1%                      | -2.8% | -3.0%                                         | -0.0% | -0.0%                        | -0.9% | -0.8%                                 | -3.0% | -2.8%     | -3.0% | -2.6%                   |  |
| Latvia                     | -2.2% | -2.3%              | -1.3% | -1.5%              | -2.4% | -2.6%                        |       |         | -1.7% | -1.5%                                         | -2.3% | -1.9%                       | -2.7% | -3.0%                     | 7.3%  | 1.1%     | -2.7% | -2.8%        | -1.1% | -0.2%                       | -0.0% | -0.1%                      | -3.2% | -3.3%                                         | -0.1% | -0.3%                        | 0.9%  | 4.3%                                  | -3.2% | -3.2%     | -1.6% | -1.1%                   |  |
| Lithuania                  | -1.4% | -1.7%              | -1.1% | -1.5%              | -1.9% | -2.3%                        |       |         | 7.5%  | 3.9%                                          | -2.6% | -2.3%                       | -2.6% | -2.8%                     | 0.8%  | 15.7%    | -2.4% | -2.5%        | -0.8% | -0.9%                       | 0.0%  | -0.0%                      | -2.9% | -3.3%                                         | -0.8% | -1.2%                        | 0.5%  | 1.1%                                  | -3.1% | -3.1%     | -1.5% | -1.4%                   |  |
| Luxembourg                 | -1.4% | -1.8%              | -0.1% | -0.3%              | -2.5% | -2.8%                        |       |         | -2.3% | -2.3%                                         | -2.1% | -2.3%                       | -2.6% | -2.9%                     | 2.8%  | -2.9%    | -2.5% | -2.8%        | -2.0% | -1.7%                       | 0.1%  | 0.0%                       | -3.2% | -3.1%                                         | -0.3% | -0.4%                        | -1.5% | -1.4%                                 | -1.3% | -2.2%     | -1.1% | -2.0%                   |  |
| Monaco                     | -1.6% | -1.8%              | 0.1%  | -0.0%              | -2.6% | -2.6%                        |       |         | -1.6% | -1.4%                                         | -1.5% | -1.6%                       | -2.4% | -2.8%                     | -2.9% | -2.9%    | -2.9% | -3.0%        | -1.7% | -1.4%                       | 0.1%  | 0.1%                       | -1.6% | -1.5%                                         | -0.0% | -0.0%                        | -1.7% | -1.6%                                 | -1.8% | -2.3%     | -2.1% | -1.7%                   |  |
| Netherlands                | -0.9% | -1.3%              | 0.7%  | 0.5%               | -2.2% | -2.3%                        |       |         | 0.7%  | -0.8%                                         | 2.3%  | 1.4%                        | -2.5% | -2.6%                     | -2.4% | -3.0%    | -2.7% | -2.9%        | -1.3% | -0.6%                       | 0.1%  | -0.0%                      | -2.9% | -3.1%                                         | -0.8% | -1.0%                        | 0.2%  | -0.0%                                 | -1.4% | -1.8%     | -1.2% | -1.3%                   |  |
| New Zealand                | -1.4% | -1.8%              | 0.4%  | 0.4%               | -2.6% | -2.8%                        |       |         | 0.7%  | 2.1%                                          | -1.6% | -1.7%                       | -2.1% | -2.5%                     | -0.4% | -2.3%    | -2.7% | -2.8%        | -1.1% | -0.7%                       | 0.1%  | 0.0%                       | -2.9% | -3.1%                                         | -0.2% | -0.5%                        | -0.3% | -0.8%                                 | -1.7% | -1.6%     | -2.0% | -1.5%                   |  |
| Norway                     | -1.3% | -1.7%              | 0.4%  | 0.2%               | -2.8% | -2.8%                        |       |         | -0.4% | -2.1%                                         | -1.9% | -1.7%                       | -2.9% | -2.9%                     | 0.2%  | -2.8%    | -2.3% | -2.9%        | -1.6% | -1.6%                       | 0.1%  | 0.0%                       | -3.0% | -1.0%                                         | -0.3% | -0.1%                        | -0.3% | -0.3%                                 | -1.0% | -1.1%     | -2.3% | -3.6%                   |  |
| Puerto Rico                | -1.0% | -1.0%              | 1.1%  | 1.2%               | -2.0% | -2.3%                        |       |         | -0.3% | 0.9%                                          | -1.1% | -1.1%                       | -2.5% | -2.8%                     | -1.6% | -2.3%    | -2.7% | -2.8%        | -0.2% | -0.3%                       | 0.0%  | -0.0%                      | -2.8% | -0.9%                                         | -0.0% | -0.2%                        | -0.1% | 0.2%                                  | -2.2% | -2.4%     | -2.7% | -2.5%                   |  |
| Qatar                      | -2.7% | -2.6%              | -1.7% | -1.4%              | -2.8% | -2.7%                        |       |         | -1.9% | -1.7%                                         | -3.1% | -3.2%                       | -2.8% | -2.5%                     | -2.8% | -2.8%    | -3.0% | -3.0%        | -1.8% | -1.9%                       | -0.1% | -0.1%                      | -1.2% | -1.1%                                         | -0.1% | -0.1%                        | -1.6% | -1.4%                                 | -2.0% | -2.4%     | -3.0% | -3.0%                   |  |
| Republic of Korea          | -2.5% | -2.5%              | -2.7% | -2.7%              | -3.1% | -3.1%                        | -3.1% | -3.2%   | -2.0% | -1.8%                                         | -3.0% | -3.0%                       | -2.3% | -2.8%                     | -1.3% | 1.4%     | -3.2% | -3.2%        | -1.5% | -1.5%                       | 0.0%  | -0.0%                      | 0.1%  | 0.4%                                          | -0.3% | -0.3%                        | -1.2% | -1.3%                                 | -3.0% | -2.9%     | -2.8% | -2.7%                   |  |
| San Marino                 | -1.2% | -1.3%              | 0.5%  | 0.3%               | -2.3% | -2.5%                        |       |         | -1.4% | -1.4%                                         | 5.7%  | 5.6%                        | -2.8% | -2.2%                     | -2.5% | -2.5%    | -2.8% | -2.8%        | -1.5% | -1.5%                       | -0.0% | -0.0%                      | -0.6% | -0.6%                                         | -1.3% | -0.7%                        | -1.0% | -1.6%                                 | -2.3% | -2.6%     | -2.5% | -2.6%                   |  |
| Singapore                  | -2.3% | -2.5%              | -2.8% | -2.8%              | -2.8% | -2.8%                        |       |         | 0.5%  | -1.5%                                         | -1.6% | -1.6%                       | -2.8% | -3.0%                     | 1.1%  | -0.2%    | -3.1% | -3.2%        | -1.8% | -1.6%                       | 0.2%  | -0.1%                      | -3.2% | -3.3%                                         | -0.0% | -0.0%                        | -2.1% | -2.1%                                 | -2.2% | -2.9%     | -3.0% | -2.7%                   |  |
| Slovakia                   | -2.1% | -2.1%              | -0.1% | -0.2%              | -2.6% | -2.7%                        |       |         | -0.7% | -0.3%                                         | 6.0%  | 5.5%                        | -2.3% | -1.9%                     | 5.0%  | 5.3%     | -2.6% | -2.9%        | -1.2% | -1.2%                       | -0.0% | -0.0%                      | -0.6% | -0.6%                                         | -0.3% | -0.5%                        | -0.6% | -1.3%                                 | -2.2% | -2.3%     | -2.4% | -2.2%                   |  |
| Slovenia                   | -1.6% | -1.9%              | -0.5% | -0.3%              | -2.9% | -3.0%                        |       |         | 0.2%  | 0.4%                                          | 5.9%  | 6.1%                        | -2.8% | -2.9%                     | 2.7%  | -2.5%    | -2.6% | -2.9%        | -1.9% | -2.1%                       | -0.0% | -0.0%                      | -3.0% | -3.1%                                         | -0.5% | -0.6%                        | -1.3% | -1.1%                                 | -1.4% | -0.8%     | -2.0% | -1.4%                   |  |
| Sweden                     | -1.1% | -1.3%              | 0.5%  | 0.2%               | -2.6% | -2.5%                        |       |         | -1.3% | -1.4%                                         | -0.2% | -0.6%                       | -2.5% | -2.5%                     | -1.3% | -2.8%    | -2.5% | -2.8%        | -1.4% | -1.1%                       | 0.1%  | 0.1%                       | -3.0% | -3.1%                                         | -0.5% | -0.2%                        | -0.3% | -0.5%                                 | -1.1% | -1.2%     | -1.5% | -2.0%                   |  |
| Switzerland                | -1.6% | -1.8%              | -0.0% | -0.5%              | -2.8% | -2.9%                        |       |         | -1.8% | -1.1%                                         | -1.4% | -1.8%                       | -3.0% | -3.0%                     | 4.6%  | 5.1%     | -2.6% | -2.7%        | -1.2% | -1.3%                       | 0.0%  | 0.0%                       | -2.7% | -2.9%                                         | -0.2% | -0.2%                        | -0.6% | -0.9%                                 | -0.9% | -2.9%     | -1.5% | -1.8%                   |  |
| Taiwan (Province of China) | -1.4% | -1.5%              | -1.2% | -1.3%              | -2.4% | -2.3%                        |       |         | 14.8% | 9.7%                                          | -2.7% | -2.8%                       | -2.3% | -2.3%                     | 8.1%  | 27.6%    | -2.5% | -2.7%        | -1.7% | -1.8%                       | 0.0%  | 0.0%                       | -2.9% | -2.2%                                         | -1.1% | -1.2%                        | 0.8%  | 0.7%                                  | -1.0% | -1.7%     | -1.7% | -1.1%                   |  |
| United Arab Emirates       | -2.6% | -2.5%              | -1.1% | -1.6%              | -3.0% | -3.0%                        | -3.3% | -3.3%   | -2.0% | -1.9%                                         | -3.0% | -3.0%                       | -2.9% | -2.9%                     | 7.3%  | 7.4%     | -3.0% | -3.0%        | -1.2% | -1.4%                       | 0.0%  | 0.0%                       | -2.2% | -2.2%                                         | -0.0% | -0.0%                        | -1.7% | -1.9%                                 | -2.7% | -2.8%     | -2.9% | -2.6%                   |  |
| United Kingdom             | -1.4% | -1.6%              | 0.5%  | 0.3%               | -2.2% | -2.3%                        |       |         | -2.0% | -2.2%                                         | -1.9% | -1.6%                       | -2.5% | -2.5%                     | -0.4% | -2.5%    | -2.4% | -2.6%        | -0.7% | -0.8%                       | 0.0%  | 0.0%                       | -0.2% | -0.2%                                         | -0.5% | -0.7%                        | -0.6% | -0.8%                                 | -0.3% | 0.6%      | -2.6% | -2.3%                   |  |
| United States of America   | -1.3% | -1.4%              | -0.6% | -1.1%              | -2.0% | -2.0%                        |       |         | -0.8% | -0.9%                                         | -0.5% | -0.7%                       | 2.3%  | -2.4%                     | 3.1%  | -3.1%    | 2.6%  | -2.6%        | 0.6%  | 0.9%                        | 0.1%  | 0.1%                       | -2.6% | -2.6%                                         | -0.3% | -0.3%                        | -0.4% | -0.4%                                 | -1.8% | -1.9%     | -1.9% | -1.8%                   |  |

**S13. (A)** Communicable disease DALYs by cause for 5-14 year age group by sex in 2019, grouped by SDI. The shading ranges from green which indicates a low number of DALYs per 100,000 for that country with in the disease, while the highest rates are shaded in a dark orange colour and indicates a country has a large DALY burden.

|                             |       | 5 to 14 years, DALYs/100,000, for males and females, 2019 |       |                    |       |                              |       |         |      |                                               |       |                             |      |                           |       |          |       |              |       |                             |      |                            |      |                                               |      |                              |      |                                       |      |           |      |                         |      |                                               |
|-----------------------------|-------|-----------------------------------------------------------|-------|--------------------|-------|------------------------------|-------|---------|------|-----------------------------------------------|-------|-----------------------------|------|---------------------------|-------|----------|-------|--------------|-------|-----------------------------|------|----------------------------|------|-----------------------------------------------|------|------------------------------|------|---------------------------------------|------|-----------|------|-------------------------|------|-----------------------------------------------|
|                             |       | Total communicable                                        |       | Enteric infections |       | Lower respiratory infections |       | Malaria |      | Neonatal sepsis and other neonatal infections |       | Vaccine Preventable disease |      | Meningitis & Encephalitis |       | HIV/AIDS |       | Tuberculosis |       | Neglected Tropical diseases |      | Infectious skin conditions |      | Sexually transmitted infections excluding HIV |      | Upper respiratory infections |      | Other unspecified infectious diseases |      | Hepatitis |      | Rheumatic heart disease |      | Maternal sepsis and other maternal infections |
|                             |       | Female                                                    | Male  | Female             | Male  | Female                       | Male  | Female  | Male | Female                                        | Male  | Female                      | Male | Female                    | Male  | Female   | Male  | Female       | Male  | Female                      | Male | Female                     | Male | Female                                        | Male | Female                       | Male | Female                                | Male | Female    | Male | Female                  | Male | Female                                        |
| Afghanistan                 | 2,996 | 2,881                                                     | 536   | 624                | 645   | 638                          | 32    | 26      | 8    | 13                                            | 408   | 323                         | 228  | 218                       | 4     | 4        | 122   | 95           | 382   | 371                         | 155  | 160                        | 2    | 3                                             | 129  | 142                          | 210  | 141                                   | 85   | 85        | 47   | 40                      | 2    |                                               |
| Benin                       | 5,754 | 6,617                                                     | 1,195 | 1,490              | 573   | 573                          | 1,456 | 1,820   | 42   | 26                                            | 742   | 660                         | 386  | 446                       | 381   | 388      | 125   | 155          | 367   | 502                         | 243  | 274                        | 6    | 4                                             | 93   | 114                          | 69   | 62                                    | 32   | 58        | 43   | 42                      | 2    |                                               |
| Burkina Faso                | 6,439 | 6,786                                                     | 1,873 | 2,046              | 735   | 710                          | 1,484 | 1,537   | 36   | 35                                            | 383   | 293                         | 575  | 589                       | 274   | 287      | 200   | 216          | 335   | 484                         | 236  | 264                        | 8    | 5                                             | 102  | 125                          | 101  | 110                                   | 36   | 34        | 49   | 51                      | 2    |                                               |
| Burundi                     | 6,286 | 7,231                                                     | 1,593 | 2,188              | 912   | 839                          | 1,149 | 1,307   | 61   | 53                                            | 187   | 171                         | 447  | 445                       | 478   | 549      | 431   | 328          | 382   | 638                         | 332  | 362                        | 5    | 6                                             | 129  | 137                          | 54   | 64                                    | 42   | 39        | 79   | 106                     | 5    |                                               |
| Central African Republic    | 9,255 | 11,659                                                    | 1,739 | 2,560              | 793   | 1,041                        | 1,666 | 2,608   | 14   | 12                                            | 701   | 668                         | 756  | 930                       | 909   | 914      | 1,326 | 1,155        | 655   | 928                         | 296  | 315                        | 15   | 16                                            | 178  | 199                          | 96   | 115                                   | 34   | 76        | 75   | 121                     | 11   |                                               |
| Chad                        | 7,487 | 8,290                                                     | 1,940 | 2,322              | 976   | 925                          | 606   | 791     | 21   | 24                                            | 1,125 | 968                         | 729  | 789                       | 442   | 428      | 435   | 438          | 623   | 894                         | 248  | 279                        | 21   | 17                                            | 106  | 127                          | 96   | 96                                    | 55   | 146       | 54   | 47                      | 11   |                                               |
| Côte d'Ivoire               | 6,094 | 7,132                                                     | 1,121 | 1,366              | 519   | 545                          | 1,875 | 2,237   | 43   | 50                                            | 201   | 172                         | 322  | 347                       | 1,018 | 1,055    | 171   | 193          | 322   | 592                         | 250  | 272                        | 11   | 9                                             | 103  | 121                          | 75   | 87                                    | 23   | 49        | 41   | 39                      | 1    |                                               |
| Dem. Rep. of the Congo      | 5,584 | 6,562                                                     | 729   | 1,193              | 565   | 541                          | 1,130 | 1,825   | 28   | 28                                            | 346   | 283                         | 450  | 397                       | 228   | 240      | 594   | 349          | 914   | 1,041                       | 265  | 290                        | 10   | 8                                             | 142  | 156                          | 95   | 91                                    | 23   | 45        | 56   | 74                      | 10   |                                               |
| Eritrea                     | 3,814 | 5,242                                                     | 1,184 | 2,142              | 606   | 846                          | 122   | 113     | 59   | 61                                            | 135   | 112                         | 316  | 349                       | 217   | 235      | 248   | 274          | 273   | 392                         | 337  | 368                        | 7    | 7                                             | 133  | 144                          | 76   | 70                                    | 28   | 33        | 67   | 95                      | 7    |                                               |
| Ethiopia                    | 4,009 | 4,876                                                     | 984   | 1,164              | 352   | 435                          | 181   | 312     | 79   | 82                                            | 277   | 231                         | 337  | 403                       | 462   | 481      | 135   | 133          | 471   | 766                         | 454  | 552                        | 9    | 10                                            | 129  | 142                          | 54   | 53                                    | 29   | 40        | 53   | 71                      | 2    |                                               |
| Gambia                      | 3,362 | 4,088                                                     | 854   | 1,144              | 341   | 403                          | 393   | 452     | 79   | 73                                            | 145   | 126                         | 271  | 367                       | 301   | 327      | 111   | 152          | 359   | 452                         | 238  | 268                        | 10   | 9                                             | 72   | 95                           | 121  | 117                                   | 26   | 66        | 39   | 37                      | 3    |                                               |
| Guinea                      | 7,400 | 8,330                                                     | 1,839 | 2,360              | 1,007 | 1,003                        | 1,039 | 1,170   | 29   | 28                                            | 689   | 582                         | 708  | 763                       | 357   | 374      | 254   | 273          | 945   | 1,113                       | 248  | 281                        | 12   | 9                                             | 96   | 118                          | 74   | 66                                    | 49   | 147       | 48   | 41                      | 5    |                                               |
| Guinea-Bissau               | 5,785 | 6,729                                                     | 1,139 | 1,379              | 519   | 663                          | 376   | 432     | 42   | 38                                            | 1,383 | 1,408                       | 419  | 567                       | 723   | 735      | 139   | 176          | 510   | 694                         | 250  | 283                        | 15   | 14                                            | 97   | 119                          | 92   | 92                                    | 32   | 82        | 47   | 48                      | 2    |                                               |
| Haiti                       | 3,568 | 3,253                                                     | 435   | 431                | 656   | 483                          | 126   | 86      | 43   | 30                                            | 174   | 140                         | 269  | 284                       | 661   | 742      | 180   | 85           | 220   | 228                         | 276  | 300                        | 13   | 12                                            | 161  | 177                          | 85   | 101                                   | 46   | 29        | 218  | 124                     | 5    |                                               |
| Liberia                     | 6,735 | 7,493                                                     | 1,328 | 1,671              | 543   | 504                          | 1,866 | 2,114   | 49   | 49                                            | 366   | 287                         | 429  | 393                       | 353   | 365      | 130   | 94           | 1,175 | 1,440                       | 239  | 267                        | 26   | 20                                            | 107  | 127                          | 44   | 50                                    | 30   | 72        | 43   | 39                      | 7    |                                               |
| Madagascar                  | 4,773 | 6,021                                                     | 1,153 | 2,559              | 764   | 622                          | 606   | 706     | 53   | 53                                            | 511   | 384                         | 322  | 275                       | 59    | 65       | 262   | 196          | 228   | 289                         | 310  | 334                        | 20   | 15                                            | 127  | 137                          | 243  | 242                                   | 28   | 25        | 84   | 119                     | 3    |                                               |
| Malawi                      | 5,933 | 7,082                                                     | 1,058 | 1,375              | 404   | 539                          | 993   | 1,273   | 63   | 64                                            | 143   | 135                         | 387  | 514                       | 1,775 | 2,009    | 224   | 200          | 229   | 260                         | 327  | 357                        | 14   | 16                                            | 141  | 154                          | 88   | 62                                    | 27   | 45        | 58   | 80                      | 2    |                                               |
| Mali                        | 6,218 | 7,979                                                     | 1,353 | 3,018              | 446   | 377                          | 804   | 1,332   | 39   | 24                                            | 631   | 492                         | 717  | 980                       | 245   | 237      | 238   | 152          | 438   | 593                         | 340  | 383                        | 23   | 17                                            | 89   | 116                          | 151  | 151                                   | 43   | 62        | 50   | 44                      | 10   |                                               |
| Mozambique                  | 8,668 | 10,074                                                    | 735   | 1,433              | 386   | 518                          | 2,110 | 2,485   | 57   | 60                                            | 156   | 143                         | 139  | 344                       | 3,943 | 3,747    | 279   | 244          | 259   | 406                         | 323  | 348                        | 15   | 17                                            | 125  | 138                          | 59   | 73                                    | 25   | 46        | 56   | 70                      | 1    |                                               |
| Nepal                       | 2,638 | 2,902                                                     | 1,014 | 1,163              | 197   | 176                          | 2     | 2       | 118  | 76                                            | 202   | 162                         | 185  | 220                       | 37    | 37       | 134   | 79           | 268   | 417                         | 179  | 262                        | 3    | 3                                             | 145  | 152                          | 54   | 47                                    | 64   | 65        | 35   | 41                      | 0    |                                               |
| Niger                       | 7,060 | 7,915                                                     | 1,652 | 2,185              | 685   | 624                          | 1,196 | 1,590   | 30   | 28                                            | 1,652 | 1,404                       | 533  | 553                       | 83    | 81       | 197   | 211          | 457   | 670                         | 253  | 278                        | 5    | 2                                             | 95   | 123                          | 125  | 75                                    | 38   | 47        | 49   | 45                      | 8    |                                               |
| Pakistan                    | 5,416 | 5,887                                                     | 2,269 | 2,537              | 362   | 555                          | 279   | 298     | 45   | 30                                            | 216   | 167                         | 431  | 682                       | 9     | 9        | 743   | 230          | 283   | 333                         | 211  | 256                        | 4    | 4                                             | 143  | 150                          | 138  | 420                                   | 116  | 123       | 166  | 93                      | 1    |                                               |
| Papua New Guinea            | 4,126 | 4,387                                                     | 935   | 1,183              | 330   | 451                          | 352   | 208     | 17   | 25                                            | 415   | 366                         | 189  | 300                       | 242   | 232      | 326   | 126          | 329   | 547                         | 344  | 369                        | 21   | 17                                            | 129  | 137                          | 60   | 81                                    | 66   | 63        | 370  | 283                     | 1    |                                               |
| Rwanda                      | 3,365 | 3,866                                                     | 735   | 1,047              | 445   | 456                          | 519   | 599     | 82   | 77                                            | 127   | 110                         | 250  | 268                       | 148   | 185      | 123   | 130          | 320   | 337                         | 338  | 376                        | 8    | 8                                             | 132  | 141                          | 57   | 25                                    | 27   | 38        | 53   | 70                      | 2    |                                               |
| Senegal                     | 4,034 | 4,699                                                     | 1,028 | 1,396              | 416   | 433                          | 611   | 699     | 58   | 63                                            | 306   | 258                         | 415  | 456                       | 146   | 155      | 109   | 113          | 439   | 562                         | 240  | 268                        | 5    | 3                                             | 96   | 118                          | 102  | 112                                   | 20   | 26        | 40   | 38                      | 2    |                                               |
| Sierra Leone                | 7,470 | 8,843                                                     | 1,580 | 2,345              | 909   | 852                          | 2,438 | 2,873   | 32   | 27                                            | 184   | 136                         | 623  | 671                       | 421   | 377      | 220   | 173          | 542   | 787                         | 240  | 269                        | 10   | 6                                             | 87   | 108                          | 87   | 105                                   | 41   | 71        | 51   | 45                      | 7    |                                               |
| Solomon Islands             | 2,868 | 3,148                                                     | 596   | 828                | 364   | 543                          | 88    | 69      | 12   | 23                                            | 133   | 142                         | 215  | 179                       | 50    | 54       | 25    | 24           | 586   | 468                         | 339  | 364                        | 37   | 41                                            | 132  | 140                          | 64   | 69                                    | 51   | 70        | 174  | 137                     | 0    |                                               |
| Somalia                     | 7,797 | 8,771                                                     | 1,961 | 2,131              | 879   | 1,004                        | 414   | 588     | 29   | 26                                            | 1,648 | 1,673                       | 678  | 756                       | 253   | 258      | 664   | 539          | 485   | 853                         | 332  | 361                        | 15   | 22                                            | 187  | 210                          | 87   | 77                                    | 64   | 133       | 92   | 140                     | 9    |                                               |
| South Sudan                 | 6,277 | 7,681                                                     | 1,362 | 1,568              | 499   | 521                          | 795   | 974     | 35   | 32                                            | 320   | 251                         | 354  | 445                       | 455   | 470      | 244   | 286          | 1,553 | 2,407                       | 339  | 372                        | 20   | 20                                            | 127  | 135                          | 74   | 70                                    | 35   | 52        | 62   | 78                      | 2    |                                               |
| Togo                        | 5,439 | 6,107                                                     | 1,404 | 1,737              | 487   | 520                          | 1,370 | 1,577   | 59   | 50                                            | 148   | 124                         | 301  | 319                       | 589   | 628      | 154   | 152          | 411   | 440                         | 241  | 270                        | 6    | 4                                             | 105  | 123                          | 99   | 74                                    | 25   | 49        | 40   | 40                      | 1    |                                               |
| Uganda                      | 5,041 | 6,117                                                     | 735   | 1,090              | 447   | 505                          | 1,086 | 1,373   | 68   | 58                                            | 458   | 417                         | 233  | 288                       | 946   | 1,134    | 163   | 197          | 266   | 356                         | 328  | 357                        | 28   | 28                                            | 144  | 153                          | 52   | 50                                    | 23   | 28        | 62   | 84                      | 2    |                                               |
| United Republic of Tanzania | 4,489 | 5,080                                                     | 1,070 | 1,340              | 527   | 570                          | 469   | 558     | 69   | 58                                            | 275   | 228                         | 200  | 238                       | 655   | 720      | 184   | 164          | 363   | 452                         | 365  | 401                        | 15   | 14                                            | 135  | 145                          | 77   | 82                                    | 25   | 32        | 58   | 79                      | 2    |                                               |
| Yemen                       | 1,885 | 1,865                                                     | 523   | 577                | 305   | 256                          | 48    | 70      | 6    | 10                                            | 188   | 152                         | 92   | 90                        | 8     | 8        | 50    | 36           | 198   | 197                         | 152  | 157                        | 3    | 3                                             | 145  | 155                          | 67   | 63                                    | 31   | 33        | 67   | 57                      | 3    |                                               |

5 to 14 years, DALYs/100,000, for males and females, 2019

|                             | Total communicable |       | Enteric infections |       | Lower respiratory infections |       | Malaria |       | Neonatal sepsis and other neonatal infections |      | Vaccine Preventable disease |      | Meningitis & Encephalitis |      | HIV/AIDS |       | Tuberculosis |       | Neglected Tropical diseases |      | Infectious skin conditions |      | Sexually transmitted infections excluding HIV |      | Upper respiratory infections |      | Other unspecified infectious diseases |      | Hepatitis |      | Rheumatic heart disease |      | Maternal sepsis and other maternal infections |      |  |
|-----------------------------|--------------------|-------|--------------------|-------|------------------------------|-------|---------|-------|-----------------------------------------------|------|-----------------------------|------|---------------------------|------|----------|-------|--------------|-------|-----------------------------|------|----------------------------|------|-----------------------------------------------|------|------------------------------|------|---------------------------------------|------|-----------|------|-------------------------|------|-----------------------------------------------|------|--|
|                             | Female             | Male  | Female             | Male  | Female                       | Male  | Female  | Male  | Female                                        | Male | Female                      | Male | Female                    | Male | Female   | Male  | Female       | Male  | Female                      | Male | Female                     | Male | Female                                        | Male | Female                       | Male | Female                                | Male | Female    | Male | Female                  | Male | Female                                        | Male |  |
|                             |                    |       |                    |       |                              |       |         |       |                                               |      |                             |      |                           |      |          |       |              |       |                             |      |                            |      |                                               |      |                              |      |                                       |      |           |      |                         |      |                                               |      |  |
| Angola                      | 4,553              | 5,334 | 793                | 1,057 | 391                          | 492   | 832     | 1,049 | 30                                            | 37   | 319                         | 290  | 405                       | 451  | 573      | 573   | 370          | 308   | 270                         | 419  | 269                        | 295  | 12                                            | 13   | 143                          | 155  | 72                                    | 76   | 20        | 45   | 53                      | 73   | 1                                             | 0    |  |
| Bangladesh                  | 3,552              | 3,400 | 1,504              | 1,594 | 548                          | 391   | 6       | 11    | 184                                           | 238  | 75                          | 80   | 230                       | 68   | 3        | 3     | 190          | 159   | 255                         | 281  | 202                        | 257  | 4                                             | 4    | 161                          | 169  | 45                                    | 50   | 86        | 56   | 59                      | 39   | 0                                             | 0    |  |
| Belize                      | 1,173              | 1,150 | 170                | 189   | 131                          | 131   | 1       | 1     | 148                                           | 83   | 4                           | 7    | 52                        | 54   | 83       | 83    | 19           | 23    | 82                          | 83   | 260                        | 267  | 1                                             | 1    | 138                          | 146  | 38                                    | 37   | 11        | 12   | 37                      | 34   | 0                                             | 0    |  |
| Bhutan                      | 2,547              | 2,737 | 975                | 1,160 | 167                          | 170   | 5       | 5     | 103                                           | 81   | 15                          | 14   | 279                       | 319  | 35       | 34    | 92           | 51    | 272                         | 266  | 200                        | 244  | 7                                             | 7    | 135                          | 143  | 162                                   | 143  | 47        | 57   | 51                      | 42   | 0                                             | 0    |  |
| Bolivia                     | 1,632              | 1,746 | 282                | 279   | 346                          | 381   | 2       | 2     | 94                                            | 91   | 51                          | 42   | 87                        | 99   | 53       | 54    | 106          | 122   | 93                          | 128  | 284                        | 291  | 6                                             | 5    | 136                          | 146  | 42                                    | 57   | 12        | 15   | 37                      | 33   | 1                                             | 0    |  |
| Cabo Verde                  | 1,511              | 1,778 | 409                | 542   | 143                          | 151   | 37      | 38    | 107                                           | 93   | 23                          | 20   | 87                        | 130  | 140      | 157   | 30           | 18    | 122                         | 163  | 220                        | 243  | 3                                             | 2    | 91                           | 104  | 58                                    | 62   | 11        | 20   | 32                      | 34   | 0                                             | 0    |  |
| Cambodia                    | 2,088              | 2,454 | 393                | 527   | 379                          | 465   | 22      | 24    | 90                                            | 116  | 99                          | 98   | 64                        | 91   | 118      | 125   | 183          | 220   | 149                         | 179  | 296                        | 314  | 1                                             | 2    | 124                          | 138  | 59                                    | 61   | 66        | 53   | 44                      | 39   | 0                                             | 0    |  |
| Cameroon                    | 5,722              | 6,341 | 1,071              | 1,273 | 532                          | 530   | 1,332   | 1,519 | 47                                            | 48   | 523                         | 447  | 354                       | 377  | 820      | 867   | 141          | 148   | 438                         | 567  | 214                        | 248  | 14                                            | 11   | 116                          | 135  | 57                                    | 61   | 24        | 71   | 39                      | 38   | 3                                             | 0    |  |
| Comoros                     | 3,927              | 4,096 | 920                | 1,242 | 577                          | 540   | 552     | 445   | 87                                            | 77   | 441                         | 364  | 360                       | 334  | 1        | 1     | 197          | 161   | 158                         | 253  | 331                        | 361  | 9                                             | 8    | 133                          | 141  | 71                                    | 65   | 29        | 30   | 61                      | 74   | 0                                             | 0    |  |
| Congo                       | 4,366              | 5,186 | 436                | 833   | 282                          | 311   | 1,116   | 1,293 | 39                                            | 43   | 277                         | 250  | 256                       | 279  | 869      | 1,064 | 221          | 175   | 292                         | 330  | 272                        | 300  | 7                                             | 7    | 133                          | 144  | 97                                    | 68   | 17        | 27   | 51                      | 63   | 1                                             | 0    |  |
| Dem. People's Rep. of Korea | 960                | 1,009 | 155                | 173   | 120                          | 117   | 2       | 1     | 14                                            | 16   | 25                          | 21   | 80                        | 83   | 15       | 15    | 41           | 39    | 46                          | 39   | 283                        | 317  | 1                                             | 2    | 116                          | 128  | 28                                    | 24   | 9         | 13   | 25                      | 23   | 0                                             | 0    |  |
| Djibouti                    | 3,750              | 4,308 | 798                | 1,113 | 488                          | 565   | 211     | 160   | 75                                            | 71   | 295                         | 223  | 302                       | 318  | 597      | 650   | 146          | 156   | 213                         | 376  | 330                        | 358  | 11                                            | 11   | 130                          | 139  | 66                                    | 62   | 24        | 32   | 56                      | 73   | 8                                             | 0    |  |
| Dominican Republic          | 1,575              | 1,704 | 212                | 266   | 170                          | 220   | 0       | 0     | 307                                           | 261  | 65                          | 55   | 99                        | 137  | 33       | 34    | 59           | 58    | 130                         | 161  | 258                        | 264  | 7                                             | 8    | 129                          | 135  | 23                                    | 21   | 15        | 27   | 67                      | 57   | 0                                             | 0    |  |
| El Salvador                 | 1,089              | 1,164 | 235                | 263   | 127                          | 158   | 0       | 0     | 34                                            | 28   | 27                          | 22   | 42                        | 46   | 93       | 92    | 7            | 7     | 84                          | 88   | 230                        | 236  | 1                                             | 1    | 142                          | 152  | 26                                    | 33   | 9         | 10   | 30                      | 28   | 0                                             | 0    |  |
| Eswatini                    | 5,718              | 6,676 | 719                | 1,170 | 482                          | 729   | 47      | 37    | 37                                            | 34   | 119                         | 106  | 214                       | 352  | 2,934    | 2,784 | 544          | 703   | 145                         | 211  | 210                        | 221  | 10                                            | 9    | 117                          | 135  | 56                                    | 75   | 17        | 29   | 68                      | 82   | 1                                             | 0    |  |
| Ghana                       | 4,192              | 5,012 | 911                | 1,033 | 296                          | 378   | 1,006   | 1,362 | 104                                           | 120  | 157                         | 139  | 434                       | 422  | 473      | 478   | 95           | 145   | 300                         | 467  | 204                        | 220  | 8                                             | 9    | 92                           | 110  | 54                                    | 66   | 26        | 29   | 32                      | 33   | 0                                             | 0    |  |
| Guatemala                   | 1,733              | 1,822 | 479                | 544   | 506                          | 521   | 2       | 2     | 29                                            | 25   | 12                          | 14   | 76                        | 84   | 30       | 39    | 23           | 19    | 127                         | 114  | 236                        | 241  | 1                                             | 1    | 134                          | 144  | 37                                    | 34   | 10        | 13   | 31                      | 28   | 0                                             | 0    |  |
| Honduras                    | 1,398              | 1,475 | 305                | 384   | 31                           | 113   | 2       | 2     | 91                                            | 74   | 31                          | 32   | 74                        | 86   | 3        | 3     | 15           | 18    | 375                         | 277  | 230                        | 237  | 1                                             | 1    | 148                          | 158  | 51                                    | 46   | 14        | 19   | 28                      | 24   | 1                                             | 0    |  |
| India                       | 3,960              | 3,553 | 1,686              | 1,531 | 337                          | 237   | 238     | 239   | 47                                            | 44   | 80                          | 63   | 355                       | 280  | 27       | 30    | 148          | 93    | 292                         | 325  | 260                        | 260  | 2                                             | 2    | 143                          | 154  | 127                                   | 107  | 152       | 148  | 64                      | 41   | 0                                             | 0    |  |
| Kenya                       | 4,270              | 5,192 | 1,136              | 1,570 | 284                          | 364   | 367     | 530   | 92                                            | 76   | 192                         | 176  | 274                       | 270  | 1,007    | 1,115 | 96           | 110   | 222                         | 335  | 325                        | 336  | 5                                             | 6    | 168                          | 184  | 27                                    | 30   | 29        | 33   | 45                      | 58   | 1                                             | 0    |  |
| Kiribati                    | 3,602              | 3,936 | 471                | 907   | 271                          | 481   | 0       | 0     | 9                                             | 18   | 360                         | 350  | 764                       | 554  | 26       | 26    | 485          | 180   | 384                         | 423  | 341                        | 372  | 20                                            | 12   | 132                          | 140  | 56                                    | 70   | 73        | 160  | 209                     | 241  | 0                                             | 0    |  |
| Kyrgyzstan                  | 946                | 1,010 | 175                | 180   | 207                          | 245   | 0       | 0     | 12                                            | 14   | 1                           | 1    | 83                        | 109  | 35       | 27    | 30           | 21    | 74                          | 65   | 146                        | 151  | 1                                             | 1    | 93                           | 110  | 34                                    | 27   | 21        | 28   | 34                      | 30   | 0                                             | 0    |  |
| Lao PDR                     | 2,445              | 2,789 | 484                | 678   | 348                          | 355   | 10      | 9     | 76                                            | 105  | 289                         | 254  | 155                       | 203  | 43       | 44    | 187          | 237   | 250                         | 285  | 298                        | 318  | 2                                             | 3    | 139                          | 152  | 43                                    | 37   | 18        | 22   | 103                     | 88   | 0                                             | 0    |  |
| Lesotho                     | 7,438              | 8,786 | 1,017              | 1,742 | 588                          | 1,002 | 0       | 0     | 38                                            | 37   | 97                          | 91   | 259                       | 420  | 3,940    | 3,654 | 886          | 1,120 | 96                          | 118  | 209                        | 222  | 10                                            | 9    | 126                          | 152  | 71                                    | 96   | 23        | 30   | 77                      | 92   | 3                                             | 0    |  |
| Maldives                    | 1,201              | 1,387 | 263                | 315   | 52                           | 38    | 0       | 0     | 84                                            | 148  | 43                          | 35   | 43                        | 43   | 3        | 1     | 17           | 16    | 199                         | 275  | 297                        | 313  | 1                                             | 2    | 128                          | 143  | 26                                    | 21   | 8         | 8    | 37                      | 28   | 0                                             | 0    |  |
| Marshall Islands            | 2,108              | 2,276 | 280                | 358   | 280                          | 452   | 0       | 0     | 15                                            | 24   | 237                         | 223  | 163                       | 145  | 42       | 45    | 121          | 58    | 221                         | 218  | 337                        | 363  | 9                                             | 8    | 127                          | 134  | 33                                    | 47   | 21        | 37   | 223                     | 164  | 0                                             | 0    |  |
| Mauritania                  | 3,270              | 3,783 | 824                | 1,124 | 348                          | 315   | 764     | 978   | 102                                           | 102  | 198                         | 154  | 246                       | 222  | 2        | 4     | 80           | 58    | 229                         | 297  | 236                        | 264  | 10                                            | 8    | 93                           | 110  | 78                                    | 79   | 23        | 32   | 37                      | 34   | 2                                             | 0    |  |
| Micronesia (Fed States of)  | 1,965              | 2,213 | 286                | 388   | 217                          | 344   | 0       | 0     | 14                                            | 27   | 110                         | 97   | 127                       | 114  | 300      | 345   | 72           | 35    | 148                         | 172  | 334                        | 359  | 9                                             | 8    | 126                          | 135  | 28                                    | 35   | 14        | 25   | 181                     | 129  | 0                                             | 0    |  |
| Mongolia                    | 1,017              | 1,131 | 189                | 195   | 227                          | 282   | 0       | 0     | 13                                            | 17   | 28                          | 23   | 100                       | 138  | 2        | 2     | 69           | 45    | 43                          | 46   | 147                        | 161  | 7                                             | 8    | 87                           | 97   | 31                                    | 30   | 40        | 60   | 35                      | 28   | 0                                             | 0    |  |
| Morocco                     | 1,180              | 1,083 | 270                | 295   | 148                          | 121   | 0       | 0     | 9                                             | 15   | 119                         | 94   | 52                        | 50   | 28       | 27    | 113          | 30    | 75                          | 74   | 151                        | 155  | 2                                             | 2    | 129                          | 144  | 32                                    | 29   | 14        | 16   | 37                      | 30   | 0                                             | 0    |  |
| Myanmar                     | 2,117              | 2,367 | 507                | 522   | 108                          | 120   | 24      | 21    | 100                                           | 122  | 192                         | 142  | 98                        | 85   | 118      | 124   | 151          | 188   | 257                         | 419  | 298                        | 315  | 3                                             | 3    | 138                          | 151  | 73                                    | 94   | 12        | 20   | 36                      | 38   | 0                                             | 0    |  |
| Nicaragua                   | 1,035              | 1,133 | 206                | 233   | 123                          | 160   | 3       | 3     | 44                                            | 38   | 6                           | 6    | 74                        | 100  | 61       | 58    | 14           | 13    | 78                          | 74   | 233                        | 242  | 1                                             | 1    | 133                          | 142  | 12                                    | 15   | 10        | 16   | 35                      | 31   | 0                                             | 0    |  |
| Nigeria                     | 5,693              | 6,866 | 1,836              | 2,008 | 267                          | 396   | 1,483   | 1,825 | 45                                            | 49   | 295                         | 304  | 383                       | 542  | 183      | 198   | 104          | 161   | 523                         | 697  | 295                        | 354  | 8                                             | 7    | 103                          | 126  | 100                                   | 107  | 27        | 52   | 39                      | 38   | 2                                             | 0    |  |
| Palestine                   | 859                | 935   | 267                | 288   | 132                          | 179   | 0       | 0     | 17                                            | 20   | 19                          | 17   | 42                        | 39   | 2        | 2     | 8            | 6     | 40                          | 36   | 152                        | 156  | 1                                             | 1    | 126                          | 137  | 24                                    | 24   | 12        | 12   | 17                      | 16   | 0                                             | 0    |  |
| Sao Tome and Principe       | 1,927              | 2,274 | 523                | 637   | 356                          | 358   | 63      | 67    | 70                                            | 92   | 101                         | 80   | 171                       | 102  | 1        | 2     | 34           | 29    | 185                         | 364  | 232                        | 258  | 5                                             | 4    | 94                           | 105  | 33                                    | 96   | 14        | 36   | 44                      | 42   | 0                                             | 0    |  |
| Sudan                       | 1,819              | 2,167 | 477                | 693   | 275                          | 249   | 49      | 71    | 7                                             | 9    | 171                         | 145  | 79                        | 92   | 70       | 65    | 34           | 39    | 211                         | 356  | 153                        | 157  | 6                                             | 6    | 125                          | 137  | 54                                    | 54   | 51        | 46   | 56                      | 50   | 2                                             | 0    |  |
| Tajikistan                  | 1,484              | 1,714 | 396                | 390   | 520                          | 710   | 1       | 1     | 18                                            | 22   | 43                          | 35   | 74                        | 93   | 1        | 1     | 52           | 53    | 60                          | 54   | 144                        | 149  | 1                                             | 6    | 79                           | 95   | 32                                    | 29   | 29        | 45   | 34                      | 32   | 0                                             | 0    |  |
| Timor-Leste                 | 2,202              | 2,745 | 422                | 726   | 279                          | 298   | 3       | 3     | 69                                            | 85   | 168                         | 139  | 138                       | 177  | 222      | 227   | 155          | 178   | 166                         | 307  | 315                        | 334  | 2                                             | 3    | 131                          | 143  | 36                                    | 44   | 17        | 17   | 77                      | 64   | 0                                             | 0    |  |
| Tuvalu                      | 1,650              | 1,780 | 238                | 337   | 214                          | 308   | 0       | 0     | 19                                            | 32   | 179                         | 155  | 125                       | 107  | 36       | 39    | 60           | 24    | 125                         | 118  | 335                        | 360  | 8                                             | 7    | 126                          | 134  | 30                                    | 38   | 16        | 28   | 140                     | 94   | 0                                             | 0    |  |
| Vanuatu                     | 2,336              | 2,607 | 400                | 545   | 318                          | 494   | 12      | 12    | 11                                            | 22   | 256                         | 244  | 175                       | 165  | 49       | 53    | 140          | 69    | 178                         | 213  | 323                        | 348  | 14                                            | 14   | 129                          | 137  | 27                                    | 36   | 34        | 52   | 270                     | 204  | 0                                             | 0    |  |
| Venezuela                   | 1,320              | 1,371 | 206                | 245   | 114                          | 142   | 88      | 77    | 263                                           | 210  | 7                           | 11   | 63                        | 72   | 29       | 29    | 15           | 12    | 136                         | 153  | 227                        | 234  | 1                                             | 1    | 141                          | 150  | 15                                    | 20   | 9         | 11   | 5                       | 5    | 1                                             | 0    |  |
| Zambia                      | 5,594              | 6,719 | 965                | 1,221 | 382                          | 500   | 946     | 1,159 | 78                                            | 76   | 106                         | 99   | 341                       | 442  | 1,551    | 1,780 | 167          | 159   | 378                         | 520  | 330                        | 359  | 16                                            | 15   | 136                          | 149  | 120                                   | 120  | 24        | 41   | 54                      | 77   | 1                                             | 0    |  |
| Zimbabwe                    | 7,038              | 6,998 | 548                | 1,035 | 378                          | 592   | 885     | 1,014 | 42                                            | 46   | 231                         | 203  | 274                       | 301  | 3,412    | 2,372 | 515          | 534   | 169                         | 224  | 210                        | 222  | 7                                             | 7    | 133                          | 150  | 49                                    | 53   | 20        | 30   | 161                     | 217  | 4                                             | 0    |  |

Low-middle SDI

5 to 14 years, DALYs/100,000, for males and females, 2019

|                             | Total communicable |       | Enteric infections |      | Lower respiratory infections |      | Malaria |       | Neonatal sepsis and other neonatal infections |      | Vaccine Preventable disease |      | Meningitis & Encephalitis |      | HIV/AIDS |       | Tuberculosis |      | Neglected Tropical diseases |      | Infectious skin conditions |      | Sexually transmitted infections excluding HIV |      | Upper respiratory infections |      | Other unspecified infectious diseases |      | Hepatitis |      | Rheumatic heart disease |      | Maternal sepsis and other maternal infections |
|-----------------------------|--------------------|-------|--------------------|------|------------------------------|------|---------|-------|-----------------------------------------------|------|-----------------------------|------|---------------------------|------|----------|-------|--------------|------|-----------------------------|------|----------------------------|------|-----------------------------------------------|------|------------------------------|------|---------------------------------------|------|-----------|------|-------------------------|------|-----------------------------------------------|
|                             | Female             | Male  | Female             | Male | Female                       | Male | Female  | Male  | Female                                        | Male | Female                      | Male | Female                    | Male | Female   | Male  | Female       | Male | Female                      | Male | Female                     | Male | Female                                        | Male | Female                       | Male | Female                                | Male | Female    | Male | Female                  | Male |                                               |
| Albania                     | 895                | 997   | 248                | 234  | 170                          | 225  | 0       | 0     | 6                                             | 6    | 14                          | 13   | 68                        | 100  | 1        | 1     | 1            | 2    | 33                          | 33   | 164                        | 169  | 1                                             | 1    | 108                          | 119  | 40                                    | 43   | 10        | 14   | 32                      | 38   | 0                                             |
| Algeria                     | 922                | 899   | 261                | 269  | 155                          | 118  | 0       | 0     | 14                                            | 19   | 39                          | 32   | 47                        | 47   | 5        | 5     | 11           | 7    | 42                          | 41   | 153                        | 157  | 1                                             | 1    | 123                          | 135  | 30                                    | 29   | 14        | 16   | 26                      | 22   | 0                                             |
| Armenia                     | 920                | 931   | 232                | 228  | 154                          | 201  | 0       | 0     | 121                                           | 63   | 1                           | 1    | 39                        | 39   | 5        | 2     | 10           | 6    | 37                          | 49   | 143                        | 148  | 1                                             | 1    | 115                          | 122  | 23                                    | 32   | 9         | 13   | 30                      | 25   | 0                                             |
| Azerbaijan                  | 1,413              | 1,491 | 223                | 234  | 601                          | 633  | 0       | 0     | 22                                            | 26   | 39                          | 31   | 144                       | 161  | 2        | 2     | 41           | 36   | 34                          | 47   | 143                        | 148  | 1                                             | 2    | 86                           | 96   | 21                                    | 22   | 17        | 24   | 37                      | 30   | 0                                             |
| Botswana                    | 2,922              | 3,442 | 387                | 575  | 607                          | 707  | 32      | 28    | 46                                            | 65   | 97                          | 78   | 213                       | 263  | 495      | 615   | 384          | 393  | 180                         | 200  | 204                        | 215  | 11                                            | 10   | 118                          | 135  | 70                                    | 79   | 13        | 15   | 63                      | 66   | 1                                             |
| Brazil                      | 1,243              | 1,293 | 191                | 198  | 134                          | 143  | 6       | 5     | 84                                            | 64   | 10                          | 10   | 58                        | 72   | 44       | 42    | 12           | 10   | 125                         | 164  | 312                        | 309  | 2                                             | 1    | 177                          | 191  | 36                                    | 36   | 10        | 12   | 42                      | 36   | 1                                             |
| China                       | 823                | 929   | 96                 | 106  | 53                           | 71   | 0       | 0     | 139                                           | 132  | 10                          | 10   | 40                        | 52   | 10       | 11    | 11           | 13   | 34                          | 40   | 280                        | 327  | 1                                             | 1    | 115                          | 128  | 9                                     | 10   | 9         | 12   | 16                      | 17   | 0                                             |
| Colombia                    | 1,128              | 1,213 | 177                | 199  | 107                          | 120  | 7       | 6     | 154                                           | 158  | 7                           | 9    | 67                        | 79   | 14       | 14    | 12           | 10   | 150                         | 159  | 233                        | 238  | 1                                             | 1    | 169                          | 179  | 15                                    | 27   | 9         | 11   | 4                       | 3    | 0                                             |
| Costa Rica                  | 815                | 846   | 160                | 186  | 31                           | 38   | 0       | 0     | 57                                            | 29   | 2                           | 2    | 51                        | 54   | 35       | 35    | 3            | 3    | 47                          | 50   | 227                        | 234  | 1                                             | 1    | 141                          | 149  | 17                                    | 21   | 9         | 12   | 34                      | 31   | 0                                             |
| Cuba                        | 843                | 901   | 132                | 173  | 37                           | 42   | 0       | 0     | 88                                            | 63   | 4                           | 6    | 50                        | 53   | 8        | 19    | 2            | 2    | 48                          | 55   | 264                        | 271  | 1                                             | 1    | 142                          | 147  | 23                                    | 30   | 8         | 9    | 36                      | 31   | 0                                             |
| Ecuador                     | 1,228              | 1,294 | 233                | 225  | 218                          | 266  | 1       | 1     | 57                                            | 54   | 37                          | 32   | 63                        | 73   | 29       | 33    | 30           | 31   | 65                          | 73   | 282                        | 289  | 4                                             | 3    | 143                          | 152  | 20                                    | 19   | 10        | 12   | 27                      | 33   | 0                                             |
| Egypt                       | 1,142              | 1,353 | 259                | 294  | 336                          | 431  | 0       | 0     | 7                                             | 10   | 22                          | 20   | 91                        | 118  | 1        | 1     | 9            | 9    | 46                          | 70   | 167                        | 169  | 1                                             | 1    | 104                          | 118  | 28                                    | 40   | 16        | 26   | 54                      | 47   | 0                                             |
| Equatorial Guinea           | 5,313              | 6,200 | 258                | 413  | 189                          | 233  | 1,656   | 2,178 | 54                                            | 55   | 164                         | 144  | 161                       | 196  | 1,875    | 2,000 | 113          | 74   | 322                         | 336  | 257                        | 279  | 16                                            | 13   | 130                          | 137  | 63                                    | 62   | 12        | 26   | 43                      | 53   | 1                                             |
| Fiji                        | 1,959              | 2,393 | 269                | 395  | 313                          | 476  | 0       | 0     | 43                                            | 58   | 77                          | 62   | 151                       | 203  | 27       | 25    | 72           | 28   | 208                         | 320  | 360                        | 383  | 14                                            | 5    | 122                          | 128  | 59                                    | 81   | 18        | 27   | 226                     | 202  | 0                                             |
| Gabon                       | 3,225              | 4,208 | 208                | 407  | 169                          | 286  | 1,003   | 1,309 | 80                                            | 76   | 128                         | 127  | 170                       | 251  | 423      | 460   | 111          | 123  | 389                         | 546  | 263                        | 289  | 6                                             | 6    | 135                          | 145  | 83                                    | 98   | 13        | 28   | 45                      | 57   | 1                                             |
| Grenada                     | 1,160              | 1,170 | 203                | 222  | 153                          | 125  | 0       | 0     | 153                                           | 138  | 6                           | 5    | 42                        | 39   | 18       | 29    | 10           | 6    | 80                          | 77   | 270                        | 288  | 1                                             | 1    | 135                          | 144  | 36                                    | 44   | 9         | 11   | 44                      | 41   | 0                                             |
| Guyana                      | 1,625              | 2,026 | 236                | 256  | 207                          | 217  | 122     | 74    | 89                                            | 141  | 4                           | 5    | 102                       | 122  | 143      | 96    | 43           | 49   | 160                         | 522  | 262                        | 269  | 2                                             | 2    | 140                          | 145  | 48                                    | 64   | 13        | 16   | 53                      | 49   | 0                                             |
| Indonesia                   | 1,978              | 2,325 | 536                | 761  | 99                           | 107  | 12      | 7     | 75                                            | 123  | 86                          | 85   | 121                       | 175  | 24       | 20    | 131          | 152  | 339                         | 321  | 311                        | 327  | 3                                             | 6    | 159                          | 172  | 31                                    | 25   | 32        | 36   | 19                      | 8    | 0                                             |
| Iran (Islamic Republic of)  | 881                | 955   | 309                | 331  | 116                          | 116  | 1       | 1     | 11                                            | 41   | 13                          | 12   | 45                        | 46   | 4        | 4     | 9            | 7    | 20                          | 22   | 155                        | 159  | 1                                             | 1    | 133                          | 146  | 22                                    | 23   | 13        | 16   | 28                      | 28   | 0                                             |
| Iraq                        | 1,105              | 1,121 | 267                | 288  | 157                          | 149  | 0       | 0     | 23                                            | 30   | 73                          | 61   | 134                       | 127  | 3        | 3     | 24           | 16   | 97                          | 105  | 145                        | 149  | 1                                             | 1    | 122                          | 134  | 21                                    | 20   | 16        | 17   | 23                      | 19   | 0                                             |
| Jamaica                     | 1,200              | 1,172 | 138                | 158  | 75                           | 72   | 0       | 0     | 245                                           | 191  | 1                           | 2    | 59                        | 61   | 99       | 72    | 3            | 3    | 86                          | 86   | 254                        | 269  | 1                                             | 1    | 138                          | 145  | 28                                    | 44   | 10        | 9    | 64                      | 59   | 0                                             |
| Mexico                      | 947                | 961   | 178                | 188  | 80                           | 82   | 0       | 0     | 107                                           | 82   | 9                           | 9    | 47                        | 50   | 18       | 22    | 9            | 7    | 56                          | 59   | 239                        | 246  | 1                                             | 1    | 153                          | 165  | 21                                    | 24   | 12        | 14   | 14                      | 12   | 0                                             |
| Namibia                     | 4,032              | 5,056 | 423                | 820  | 358                          | 560  | 321     | 300   | 47                                            | 48   | 51                          | 43   | 138                       | 209  | 1,547    | 1,856 | 310          | 367  | 371                         | 340  | 206                        | 217  | 8                                             | 8    | 121                          | 139  | 66                                    | 76   | 12        | 13   | 52                      | 59   | 1                                             |
| Nauru                       | 1,838              | 2,068 | 250                | 324  | 365                          | 580  | 0       | 0     | 21                                            | 34   | 32                          | 29   | 160                       | 145  | 35       | 38    | 80           | 34   | 156                         | 163  | 337                        | 362  | 10                                            | 8    | 121                          | 128  | 28                                    | 38   | 18        | 31   | 224                     | 152  | 0                                             |
| Panama                      | 1,176              | 1,154 | 266                | 278  | 109                          | 117  | 1       | 1     | 185                                           | 124  | 2                           | 2    | 58                        | 62   | 25       | 35    | 53           | 39   | 42                          | 45   | 231                        | 237  | 1                                             | 1    | 139                          | 151  | 22                                    | 22   | 10        | 11   | 34                      | 29   | 0                                             |
| Paraguay                    | 1,150              | 1,205 | 174                | 196  | 136                          | 129  | 0       | 0     | 14                                            | 30   | 24                          | 19   | 64                        | 69   | 104      | 104   | 18           | 17   | 66                          | 87   | 302                        | 298  | 10                                            | 10   | 163                          | 177  | 27                                    | 26   | 8         | 9    | 38                      | 34   | 0                                             |
| Peru                        | 1,652              | 1,738 | 237                | 244  | 280                          | 290  | 5       | 6     | 279                                           | 287  | 36                          | 28   | 77                        | 90   | 113      | 114   | 51           | 43   | 65                          | 100  | 285                        | 292  | 3                                             | 2    | 150                          | 158  | 30                                    | 42   | 11        | 14   | 30                      | 27   | 0                                             |
| Philippines                 | 2,965              | 3,237 | 500                | 593  | 471                          | 501  | 3       | 1     | 164                                           | 158  | 189                         | 183  | 233                       | 276  | 105      | 121   | 213          | 263  | 467                         | 487  | 317                        | 336  | 4                                             | 4    | 159                          | 176  | 24                                    | 32   | 11        | 14   | 105                     | 91   | 0                                             |
| Saint Lucia                 | 1,191              | 1,109 | 210                | 232  | 96                           | 81   | 0       | 0     | 177                                           | 96   | 4                           | 12   | 81                        | 74   | 19       | 15    | 12           | 12   | 101                         | 79   | 265                        | 275  | 2                                             | 1    | 136                          | 145  | 33                                    | 43   | 9         | 10   | 45                      | 35   | 0                                             |
| Samoa                       | 1,653              | 1,854 | 229                | 317  | 155                          | 240  | 0       | 0     | 16                                            | 27   | 315                         | 304  | 94                        | 88   | 46       | 50    | 44           | 21   | 126                         | 160  | 330                        | 357  | 6                                             | 6    | 124                          | 132  | 29                                    | 33   | 12        | 24   | 127                     | 95   | 0                                             |
| South Africa                | 4,635              | 5,231 | 376                | 401  | 293                          | 329  | 29      | 23    | 54                                            | 60   | 153                         | 133  | 98                        | 114  | 2,678    | 3,218 | 355          | 316  | 121                         | 124  | 208                        | 219  | 12                                            | 12   | 133                          | 152  | 71                                    | 76   | 9         | 10   | 46                      | 43   | 0                                             |
| St Vincent & the Grenadines | 1,189              | 1,180 | 188                | 195  | 110                          | 77   | 0       | 0     | 136                                           | 132  | 8                           | 4    | 58                        | 68   | 88       | 87    | 13           | 13   | 79                          | 74   | 266                        | 277  | 1                                             | 2    | 140                          | 146  | 40                                    | 52   | 9         | 10   | 51                      | 42   | 0                                             |
| Suriname                    | 1,497              | 1,507 | 207                | 234  | 113                          | 107  | 5       | 5     | 191                                           | 175  | 18                          | 17   | 90                        | 108  | 100      | 66    | 13           | 12   | 242                         | 231  | 276                        | 294  | 4                                             | 4    | 136                          | 143  | 48                                    | 59   | 11        | 13   | 44                      | 39   | 0                                             |
| Syrian Arab Republic        | 1,458              | 1,487 | 289                | 310  | 373                          | 368  | 0       | 0     | 7                                             | 9    | 64                          | 51   | 151                       | 154  | 1        | 1     | 13           | 11   | 193                         | 187  | 144                        | 148  | 2                                             | 2    | 122                          | 135  | 35                                    | 34   | 13        | 21   | 53                      | 55   | 0                                             |
| Thailand                    | 1,283              | 1,382 | 323                | 385  | 118                          | 122  | 1       | 1     | 107                                           | 97   | 37                          | 34   | 68                        | 78   | 11       | 10    | 20           | 20   | 78                          | 75   | 294                        | 311  | 2                                             | 2    | 173                          | 188  | 16                                    | 21   | 8         | 9    | 27                      | 28   | 0                                             |
| Tokelau                     | 1,370              | 1,423 | 202                | 284  | 132                          | 148  | 0       | 0     | 20                                            | 40   | 151                         | 130  | 86                        | 66   | 36       | 39    | 30           | 10   | 124                         | 116  | 335                        | 359  | 7                                             | 6    | 124                          | 130  | 25                                    | 31   | 14        | 20   | 84                      | 42   | 0                                             |
| Tonga                       | 1,649              | 1,800 | 192                | 266  | 137                          | 220  | 0       | 0     | 60                                            | 60   | 122                         | 107  | 294                       | 232  | 13       | 18    | 32           | 17   | 151                         | 147  | 334                        | 360  | 4                                             | 4    | 125                          | 132  | 22                                    | 37   | 71        | 126  | 91                      | 76   | 0                                             |
| Tunisia                     | 802                | 837   | 251                | 275  | 105                          | 99   | 0       | 0     | 12                                            | 15   | 33                          | 29   | 41                        | 43   | 4        | 5     | 7            | 5    | 33                          | 35   | 152                        | 156  | 1                                             | 1    | 124                          | 135  | 18                                    | 17   | 12        | 15   | 8                       | 8    | 0                                             |
| Turkmenistan                | 1,169              | 1,295 | 154                | 161  | 466                          | 535  | 0       | 0     | 20                                            | 21   | 1                           | 2    | 115                       | 135  | 3        | 4     | 40           | 32   | 42                          | 40   | 144                        | 149  | 1                                             | 1    | 87                           | 98   | 28                                    | 28   | 28        | 56   | 39                      | 33   | 0                                             |
| Uzbekistan                  | 1,619              | 1,787 | 160                | 166  | 801                          | 918  | 0       | 0     | 25                                            | 32   | 1                           | 1    | 144                       | 181  | 8        | 18    | 41           | 32   | 81                          | 70   | 143                        | 149  | 1                                             | 1    | 89                           | 97   | 52                                    | 45   | 26        | 38   | 46                      | 39   | 0                                             |
| Viet Nam                    | 1,148              | 1,371 | 288                | 345  | 49                           | 82   | 2       | 1     | 129                                           | 134  | 46                          | 42   | 80                        | 139  | 1        | 2     | 38           | 45   | 66                          | 110  | 295                        | 312  | 1                                             | 2    | 119                          | 130  | 16                                    | 12   | 12        | 13   | 8                       | 3    | 0                                             |

5 to 14 years, DALYs/100,000, for males and females, 2019

|                              | Total communicable |       | Enteric infections |      | Lower respiratory infections |      | Malaria |      | Neonatal sepsis and other neonatal infections |      | Vaccine Preventable disease |      | Meningitis & Encephalitis |      | HIV/AIDS |      | Tuberculosis |      | Neglected Tropical diseases |      | Infectious skin conditions |      | Sexually transmitted infections excluding HIV |      | Upper respiratory infections |      | Other unspecified infectious diseases |      | Hepatitis |      | Rheumatic heart disease |      | Maternal sepsis and other maternal infections |
|------------------------------|--------------------|-------|--------------------|------|------------------------------|------|---------|------|-----------------------------------------------|------|-----------------------------|------|---------------------------|------|----------|------|--------------|------|-----------------------------|------|----------------------------|------|-----------------------------------------------|------|------------------------------|------|---------------------------------------|------|-----------|------|-------------------------|------|-----------------------------------------------|
|                              | Female             | Male  | Female             | Male | Female                       | Male | Female  | Male | Female                                        | Male | Female                      | Male | Female                    | Male | Female   | Male | Female       | Male | Female                      | Male | Female                     | Male | Female                                        | Male | Female                       | Male | Female                                | Male | Female    | Male | Female                  | Male |                                               |
|                              |                    |       |                    |      |                              |      |         |      |                                               |      |                             |      |                           |      |          |      |              |      |                             |      |                            |      |                                               |      |                              |      |                                       |      |           |      |                         |      |                                               |
| American Samoa               | 1,215              | 1,367 | 191                | 285  | 122                          | 144  | 0       | 0    | 5                                             | 12   | 111                         | 94   | 95                        | 71   | 10       | 14   | 11           | 5    | 81                          | 132  | 332                        | 364  | 6                                             | 6    | 117                          | 124  | 12                                    | 29   | 13        | 19   | 107                     | 69   | 0                                             |
| Antigua and Barbuda          | 898                | 1,098 | 159                | 177  | 72                           | 97   | 0       | 0    | 11                                            | 81   | 6                           | 3    | 42                        | 66   | 33       | 55   | 11           | 8    | 98                          | 112  | 257                        | 281  | 1                                             | 1    | 133                          | 140  | 29                                    | 35   | 9         | 11   | 38                      | 31   | 0                                             |
| Argentina                    | 801                | 717   | 66                 | 104  | 91                           | 88   | 0       | 0    | 6                                             | 5    | 6                           | 5    | 45                        | 49   | 19       | 19   | 8            | 6    | 30                          | 40   | 335                        | 193  | 1                                             | 1    | 143                          | 149  | 18                                    | 20   | 8         | 9    | 25                      | 22   | 1                                             |
| Bahamas                      | 1,083              | 1,012 | 151                | 168  | 83                           | 85   | 0       | 0    | 143                                           | 67   | 2                           | 6    | 49                        | 57   | 119      | 95   | 11           | 10   | 53                          | 50   | 258                        | 267  | 1                                             | 1    | 135                          | 137  | 32                                    | 33   | 9         | 10   | 36                      | 32   | 0                                             |
| Bahrain                      | 702                | 741   | 267                | 275  | 56                           | 63   | 0       | 0    | 5                                             | 5    | 10                          | 9    | 18                        | 28   | 6        | 4    | 7            | 7    | 24                          | 20   | 153                        | 162  | 1                                             | 2    | 121                          | 131  | 20                                    | 19   | 9         | 13   | 7                       | 5    | 0                                             |
| Barbados                     | 1,311              | 1,168 | 182                | 195  | 86                           | 64   | 0       | 0    | 280                                           | 209  | 6                           | 5    | 73                        | 65   | 47       | 32   | 6            | 4    | 121                         | 80   | 272                        | 291  | 1                                             | 1    | 135                          | 141  | 53                                    | 43   | 9         | 9    | 40                      | 31   | 0                                             |
| Belarus                      | 566                | 582   | 122                | 118  | 33                           | 37   | 0       | 0    | 66                                            | 44   | 2                           | 1    | 53                        | 73   | 4        | 5    | 3            | 2    | 9                           | 10   | 133                        | 138  | 1                                             | 0    | 119                          | 127  | 10                                    | 12   | 11        | 14   | 1                       | 1    | 0                                             |
| Bosnia and Herzegovina       | 655                | 693   | 224                | 238  | 39                           | 49   | 0       | 0    | 21                                            | 23   | 32                          | 27   | 18                        | 21   | 0        | 0    | 3            | 4    | 22                          | 22   | 163                        | 168  | 1                                             | 1    | 106                          | 112  | 18                                    | 18   | 7         | 9    | 1                       | 1    | 0                                             |
| Bulgaria                     | 739                | 764   | 197                | 201  | 131                          | 140  | 0       | 0    | 20                                            | 18   | 2                           | 1    | 56                        | 55   | 3        | 3    | 4            | 3    | 23                          | 24   | 166                        | 169  | 1                                             | 0    | 104                          | 110  | 21                                    | 22   | 10        | 13   | 2                       | 3    | 0                                             |
| Chile                        | 658                | 542   | 72                 | 92   | 31                           | 28   | 0       | 0    | 4                                             | 10   | 4                           | 5    | 31                        | 33   | 5        | 4    | 5            | 3    | 4                           | 4    | 335                        | 191  | 1                                             | 0    | 144                          | 149  | 12                                    | 12   | 8         | 8    | 2                       | 2    | 0                                             |
| Cook Islands                 | 956                | 1,125 | 167                | 237  | 81                           | 127  | 0       | 0    | 27                                            | 53   | 29                          | 25   | 16                        | 17   | 36       | 40   | 6            | 3    | 101                         | 97   | 327                        | 352  | 5                                             | 5    | 116                          | 122  | 14                                    | 19   | 8         | 11   | 23                      | 17   | 0                                             |
| Croatia                      | 541                | 600   | 165                | 190  | 17                           | 17   | 0       | 0    | 49                                            | 71   | 1                           | 1    | 15                        | 13   | 1        | 4    | 2            | 1    | 8                           | 9    | 163                        | 168  | 1                                             | 0    | 104                          | 109  | 8                                     | 10   | 6         | 6    | 1                       | 1    | 0                                             |
| Dominica                     | 1,307              | 1,260 | 165                | 180  | 127                          | 122  | 0       | 0    | 247                                           | 165  | 27                          | 23   | 89                        | 110  | 31       | 67   | 27           | 27   | 72                          | 49   | 276                        | 290  | 4                                             | 6    | 143                          | 144  | 30                                    | 29   | 11        | 11   | 55                      | 38   | 2                                             |
| Georgia                      | 856                | 907   | 214                | 224  | 141                          | 133  | 0       | 0    | 31                                            | 43   | 3                           | 2    | 45                        | 69   | 5        | 4    | 19           | 15   | 54                          | 57   | 145                        | 149  | 1                                             | 1    | 87                           | 98   | 33                                    | 30   | 11        | 18   | 68                      | 64   | 0                                             |
| Greece                       | 548                | 428   | 57                 | 69   | 30                           | 30   | 0       | 0    | 2                                             | 2    | 1                           | 2    | 13                        | 15   | 1        | 2    | 1            | 1    | 8                           | 13   | 284                        | 195  | 1                                             | 0    | 138                          | 145  | 7                                     | 9    | 4         | 5    | 1                       | 1    | 0                                             |
| Greenland                    | 753                | 675   | 69                 | 110  | 32                           | 21   | 0       | 0    | 2                                             | 3    | 48                          | 42   | 28                        | 46   | 14       | 11   | 3            | 4    | 16                          | 13   | 370                        | 252  | 1                                             | 0    | 148                          | 149  | 15                                    | 17   | 6         | 6    | 1                       | 1    | 0                                             |
| Hungary                      | 600                | 621   | 234                | 238  | 30                           | 28   | 0       | 0    | 15                                            | 23   | 1                           | 1    | 13                        | 13   | 1        | 1    | 1            | 1    | 14                          | 17   | 162                        | 167  | 1                                             | 0    | 104                          | 108  | 16                                    | 17   | 5         | 6    | 1                       | 1    | 0                                             |
| Israel                       | 506                | 419   | 63                 | 74   | 24                           | 23   | 0       | 0    | 2                                             | 3    | 3                           | 3    | 14                        | 15   | 3        | 6    | 1            | 0    | 7                           | 12   | 234                        | 117  | 1                                             | 0    | 139                          | 145  | 11                                    | 15   | 3         | 4    | 2                       | 3    | 0                                             |
| Italy                        | 537                | 413   | 49                 | 62   | 12                           | 10   | 0       | 0    | 6                                             | 6    | 2                           | 2    | 14                        | 16   | 4        | 3    | 1            | 0    | 4                           | 6    | 283                        | 195  | 1                                             | 0    | 147                          | 154  | 7                                     | 9    | 5         | 6    | 3                       | 3    | 0                                             |
| Jordan                       | 782                | 771   | 241                | 240  | 97                           | 76   | 0       | 0    | 19                                            | 24   | 47                          | 41   | 53                        | 57   | 2        | 2    | 3            | 1    | 34                          | 32   | 151                        | 155  | 1                                             | 2    | 98                           | 109  | 20                                    | 18   | 11        | 13   | 4                       | 3    | 0                                             |
| Kazakhstan                   | 782                | 814   | 155                | 156  | 138                          | 138  | 0       | 0    | 21                                            | 24   | 2                           | 3    | 97                        | 109  | 4        | 2    | 19           | 12   | 53                          | 56   | 144                        | 149  | 1                                             | 1    | 99                           | 109  | 34                                    | 37   | 12        | 14   | 4                       | 3    | 0                                             |
| Lebanon                      | 851                | 894   | 265                | 291  | 55                           | 60   | 0       | 0    | 15                                            | 18   | 80                          | 58   | 31                        | 33   | 12       | 12   | 6            | 4    | 21                          | 22   | 153                        | 157  | 1                                             | 1    | 124                          | 135  | 71                                    | 80   | 14        | 15   | 4                       | 8    | 0                                             |
| Libya                        | 936                | 901   | 293                | 296  | 97                           | 80   | 0       | 0    | 5                                             | 7    | 26                          | 21   | 35                        | 33   | 5        | 5    | 8            | 7    | 121                         | 92   | 148                        | 152  | 1                                             | 1    | 122                          | 132  | 28                                    | 25   | 13        | 14   | 35                      | 35   | 0                                             |
| Malaysia                     | 1,336              | 1,477 | 266                | 311  | 123                          | 132  | 2       | 2    | 54                                            | 78   | 35                          | 32   | 70                        | 86   | 106      | 101  | 25           | 19   | 165                         | 193  | 292                        | 310  | 1                                             | 2    | 130                          | 141  | 30                                    | 33   | 8         | 10   | 30                      | 27   | 0                                             |
| Malta                        | 571                | 440   | 45                 | 54   | 38                           | 28   | 0       | 0    | 4                                             | 4    | 2                           | 3    | 22                        | 22   | 3        | 3    | 0            | 0    | 14                          | 24   | 290                        | 137  | 1                                             | 0    | 138                          | 146  | 8                                     | 13   | 4         | 4    | 1                       | 1    | 0                                             |
| Mauritius                    | 1,057              | 1,328 | 116                | 136  | 64                           | 64   | 0       | 0    | 63                                            | 226  | 3                           | 2    | 51                        | 61   | 5        | 21   | 9            | 8    | 267                         | 297  | 288                        | 307  | 1                                             | 1    | 130                          | 141  | 26                                    | 24   | 8         | 10   | 27                      | 28   | 0                                             |
| Montenegro                   | 583                | 607   | 166                | 163  | 36                           | 46   | 0       | 0    | 35                                            | 26   | 14                          | 12   | 14                        | 22   | 4        | 5    | 1            | 1    | 21                          | 30   | 164                        | 168  | 1                                             | 0    | 105                          | 110  | 13                                    | 15   | 7         | 8    | 1                       | 1    | 0                                             |
| Niue                         | 1,456              | 1,700 | 212                | 292  | 230                          | 370  | 0       | 0    | 29                                            | 45   | 53                          | 43   | 88                        | 85   | 35       | 38   | 32           | 16   | 176                         | 184  | 333                        | 355  | 8                                             | 7    | 120                          | 125  | 20                                    | 28   | 12        | 23   | 107                     | 90   | 0                                             |
| North Macedonia              | 734                | 748   | 229                | 206  | 67                           | 78   | 0       | 0    | 50                                            | 46   | 36                          | 32   | 27                        | 30   | 1        | 1    | 4            | 3    | 22                          | 33   | 164                        | 168  | 1                                             | 1    | 106                          | 111  | 17                                    | 22   | 8         | 10   | 2                       | 6    | 0                                             |
| Northern Mariana Islands     | 1,142              | 1,284 | 174                | 258  | 80                           | 167  | 0       | 0    | 8                                             | 21   | 56                          | 56   | 57                        | 46   | 17       | 20   | 19           | 7    | 155                         | 136  | 334                        | 353  | 11                                            | 5    | 115                          | 120  | 17                                    | 24   | 13        | 24   | 84                      | 48   | 0                                             |
| Oman                         | 930                | 954   | 299                | 307  | 120                          | 98   | 0       | 0    | 10                                            | 14   | 19                          | 14   | 82                        | 106  | 7        | 8    | 7            | 5    | 50                          | 56   | 156                        | 160  | 1                                             | 1    | 120                          | 130  | 39                                    | 40   | 19        | 13   | 3                       | 2    | 0                                             |
| Palau                        | 1,735              | 1,881 | 332                | 443  | 469                          | 552  | 0       | 0    | 29                                            | 49   | 44                          | 40   | 99                        | 14   | 34       | 37   | 28           | 9    | 155                         | 141  | 327                        | 352  | 5                                             | 5    | 118                          | 125  | 18                                    | 24   | 15        | 46   | 63                      | 44   | 0                                             |
| Poland                       | 523                | 548   | 129                | 138  | 44                           | 46   | 0       | 0    | 5                                             | 6    | 1                           | 1    | 18                        | 19   | 4        | 4    | 2            | 1    | 18                          | 19   | 166                        | 170  | 1                                             | 0    | 112                          | 118  | 16                                    | 18   | 6         | 7    | 1                       | 1    | 0                                             |
| Portugal                     | 548                | 429   | 49                 | 58   | 33                           | 29   | 0       | 0    | 3                                             | 6    | 2                           | 2    | 17                        | 22   | 4        | 6    | 1            | 1    | 8                           | 13   | 281                        | 134  | 1                                             | 0    | 133                          | 140  | 11                                    | 13   | 4         | 5    | 1                       | 1    | 0                                             |
| Republic of Moldova          | 953                | 956   | 133                | 134  | 134                          | 139  | 0       | 0    | 313                                           | 300  | 1                           | 1    | 42                        | 56   | 5        | 4    | 12           | 7    | 23                          | 18   | 134                        | 138  | 1                                             | 0    | 124                          | 130  | 19                                    | 17   | 8         | 10   | 3                       | 3    | 0                                             |
| Romania                      | 807                | 814   | 218                | 206  | 178                          | 200  | 0       | 0    | 19                                            | 8    | 2                           | 2    | 44                        | 44   | 16       | 8    | 14           | 11   | 19                          | 23   | 166                        | 170  | 1                                             | 0    | 103                          | 108  | 19                                    | 25   | 7         | 9    | 1                       | 1    | 0                                             |
| Russian Federation           | 683                | 677   | 158                | 146  | 77                           | 75   | 0       | 0    | 60                                            | 40   | 3                           | 2    | 41                        | 48   | 37       | 42   | 7            | 4    | 9                           | 11   | 144                        | 148  | 1                                             | 0    | 128                          | 138  | 8                                     | 11   | 9         | 9    | 2                       | 2    | 0                                             |
| Saint Kitts and Nevis        | 1,076              | 1,090 | 178                | 203  | 118                          | 108  | 0       | 0    | 66                                            | 54   | 4                           | 7    | 96                        | 66   | 96       | 101  | 11           | 12   | 62                          | 56   | 260                        | 284  | 2                                             | 1    | 133                          | 145  | 29                                    | 35   | 10        | 10   | 12                      | 8    | 1                                             |
| Saudi Arabia                 | 700                | 680   | 239                | 224  | 67                           | 46   | 0       | 0    | 20                                            | 24   | 11                          | 10   | 24                        | 17   | 13       | 13   | 12           | 11   | 23                          | 27   | 151                        | 154  | 1                                             | 1    | 120                          | 129  | 8                                     | 10   | 8         | 10   | 4                       | 3    | 0                                             |
| Serbia                       | 558                | 596   | 157                | 186  | 27                           | 30   | 0       | 0    | 18                                            | 16   | 16                          | 13   | 21                        | 21   | 6        | 8    | 2            | 1    | 18                          | 18   | 164                        | 167  | 1                                             | 1    | 105                          | 111  | 15                                    | 15   | 8         | 9    | 1                       | 1    | 0                                             |
| Seychelles                   | 1,300              | 1,679 | 267                | 407  | 154                          | 216  | 0       | 0    | 156                                           | 224  | 49                          | 39   | 39                        | 83   | 24       | 20   | 13           | 10   | 115                         | 135  | 294                        | 310  | 2                                             | 2    | 130                          | 142  | 26                                    | 55   | 8         | 10   | 24                      | 27   | 0                                             |
| Spain                        | 556                | 447   | 55                 | 68   | 15                           | 14   | 0       | 0    | 7                                             | 7    | 3                           | 2    | 21                        | 22   | 4        | 6    | 1            | 0    | 4                           | 16   | 295                        | 145  | 1                                             | 0    | 138                          | 145  | 8                                     | 17   | 4         | 4    | 1                       | 1    | 0                                             |
| Sri Lanka                    | 1,269              | 1,343 | 332                | 356  | 107                          | 103  | 0       | 0    | 105                                           | 127  | 25                          | 21   | 76                        | 79   | 1        | 1    | 18           | 15   | 148                         | 153  | 285                        | 302  | 1                                             | 2    | 134                          | 145  | 22                                    | 25   | 7         | 9    | 8                       | 7    | 0                                             |
| Trinidad and Tobago          | 993                | 1,025 | 137                | 144  | 84                           | 90   | 0       | 0    | 88                                            | 101  | 3                           | 2    | 54                        | 58   | 83       | 53   | 5            | 5    | 70                          | 77   | 256                        | 270  | 1                                             | 1    | 133                          | 139  | 35                                    | 40   | 9         | 9    | 37                      | 34   | 0                                             |
| Turkey                       | 831                | 867   | 251                | 284  | 85                           | 90   | 0       | 0    | 50                                            | 37   | 25                          | 24   | 36                        | 39   | 2        | 2    | 10           | 9    | 25                          | 23   | 148                        | 152  | 1                                             | 1    | 145                          | 152  | 30                                    | 40   | 10        | 12   | 2                       | 2    | 0                                             |
| Ukraine                      | 645                | 687   | 129                | 139  | 76                           | 88   | 0       | 0    | 42                                            | 46   | 4                           | 3    | 68                        | 72   | 20       | 16   | 10           | 6    | 9                           | 12   | 133                        | 138  | 1                                             | 0    | 130                          | 140  | 10                                    | 12   | 10        | 14   | 3                       | 2    | 0                                             |
| United States Virgin Islands | 835                | 874   | 173                | 184  | 23                           | 34   | 0       | 0    | 67                                            | 57   | 34                          | 33   | 21                        | 28   | 23       | 20   | 5            | 3    | 61                          | 57   | 257                        | 275  | 2                                             | 4    | 131                          | 135  | 25                                    | 30   | 9         | 9    | 5                       | 6    | 0                                             |
| Uruguay                      | 661                | 567   | 50                 | 78   | 40                           | 38   | 0       | 0    | 11                                            | 20   | 2                           | 2    | 39                        | 32   | 6        | 9    | 2            | 2    | 12                          | 13   | 334                        | 192  | 1                                             | 1    | 143                          | 148  | 12                                    | 13   | 7         | 7    | 1                       | 2    | 0                                             |

5 to 14 years, DALYs/100,000, for males and females, 2019

|                            | Total communicable |       | Enteric infections |      | Lower respiratory infections |      | Malaria |      | Neonatal sepsis and other neonatal infections |      | Vaccine Preventable disease |      | Meningitis & Encephalitis |      | HIV/AIDS |      | Tuberculosis |      | Neglected Tropical diseases |      | Infectious skin conditions |      | Sexually transmitted infections excluding HIV |      | Upper respiratory infections |      | Other unspecified infectious diseases |      | Hepatitis |      | Rheumatic heart disease |      | Maternal sepsis and other maternal infections |
|----------------------------|--------------------|-------|--------------------|------|------------------------------|------|---------|------|-----------------------------------------------|------|-----------------------------|------|---------------------------|------|----------|------|--------------|------|-----------------------------|------|----------------------------|------|-----------------------------------------------|------|------------------------------|------|---------------------------------------|------|-----------|------|-------------------------|------|-----------------------------------------------|
|                            | Female             | Male  | Female             | Male | Female                       | Male | Female  | Male | Female                                        | Male | Female                      | Male | Female                    | Male | Female   | Male | Female       | Male | Female                      | Male | Female                     | Male | Female                                        | Male | Female                       | Male | Female                                | Male | Female    | Male | Female                  | Male |                                               |
|                            |                    |       |                    |      |                              |      |         |      |                                               |      |                             |      |                           |      |          |      |              |      |                             |      |                            |      |                                               |      |                              |      |                                       |      |           |      |                         |      |                                               |
| Andorra                    | 531                | 384   | 53                 | 63   | 14                           | 8    | 0       | 0    | 3                                             | 3    | 3                           | 3    | 13                        | 8    | 2        | 2    | 0            | 0    | 4                           | 5    | 285                        | 134  | 1                                             | 1    | 136                          | 143  | 9                                     | 8    | 7         | 5    | 1                       | 1    | 0                                             |
| Australia                  | 586                | 462   | 41                 | 57   | 13                           | 9    | 0       | 0    | 2                                             | 2    | 3                           | 3    | 12                        | 14   | 2        | 1    | 1            | 0    | 8                           | 9    | 345                        | 201  | 1                                             | 0    | 140                          | 144  | 11                                    | 14   | 4         | 5    | 2                       | 2    | 0                                             |
| Austria                    | 531                | 397   | 56                 | 65   | 12                           | 7    | 0       | 0    | 3                                             | 3    | 2                           | 2    | 13                        | 14   | 2        | 3    | 0            | 0    | 5                           | 8    | 288                        | 136  | 1                                             | 0    | 134                          | 141  | 10                                    | 12   | 3         | 4    | 1                       | 1    | 0                                             |
| Belgium                    | 562                | 434   | 73                 | 85   | 16                           | 15   | 0       | 0    | 5                                             | 3    | 3                           | 4    | 17                        | 19   | 5        | 5    | 1            | 0    | 3                           | 6    | 288                        | 136  | 1                                             | 0    | 137                          | 143  | 10                                    | 13   | 4         | 4    | 1                       | 1    | 0                                             |
| Bermuda                    | 701                | 714   | 145                | 164  | 28                           | 24   | 0       | 0    | 21                                            | 3    | 3                           | 3    | 39                        | 20   | 24       | 41   | 9            | 4    | 23                          | 29   | 254                        | 260  | 1                                             | 1    | 131                          | 136  | 14                                    | 16   | 8         | 8    | 3                       | 3    | 0                                             |
| Brunei Darussalam          | 829                | 727   | 9                  | 12   | 161                          | 152  | 0       | 0    | 6                                             | 7    | 10                          | 8    | 80                        | 42   | 6        | 7    | 23           | 10   | 55                          | 86   | 339                        | 198  | 1                                             | 1    | 137                          | 142  | 37                                    | 44   | 9         | 13   | 5                       | 4    | 0                                             |
| Canada                     | 824                | 581   | 61                 | 124  | 18                           | 14   | 0       | 0    | 9                                             | 7    | 4                           | 3    | 12                        | 12   | 4        | 2    | 0            | 0    | 3                           | 4    | 549                        | 250  | 1                                             | 0    | 151                          | 151  | 10                                    | 10   | 3         | 4    | 1                       | 1    | 0                                             |
| Cyprus                     | 539                | 409   | 69                 | 81   | 9                            | 8    | 0       | 0    | 2                                             | 2    | 4                           | 4    | 7                         | 9    | 0        | 0    | 0            | 0    | 4                           | 7    | 290                        | 137  | 1                                             | 1    | 138                          | 145  | 9                                     | 9    | 4         | 4    | 1                       | 2    | 0                                             |
| Czechia                    | 551                | 578   | 180                | 190  | 31                           | 38   | 0       | 0    | 25                                            | 24   | 2                           | 1    | 14                        | 14   | 2        | 1    | 1            | 1    | 12                          | 13   | 164                        | 168  | 1                                             | 0    | 102                          | 108  | 13                                    | 14   | 5         | 6    | 1                       | 1    | 0                                             |
| Denmark                    | 581                | 408   | 68                 | 80   | 11                           | 8    | 0       | 0    | 2                                             | 2    | 2                           | 2    | 14                        | 14   | 1        | 1    | 1            | 0    | 5                           | 6    | 330                        | 139  | 1                                             | 0    | 135                          | 142  | 8                                     | 10   | 2         | 3    | 1                       | 0    | 0                                             |
| Estonia                    | 515                | 482   | 161                | 132  | 54                           | 32   | 0       | 0    | 12                                            | 15   | 1                           | 1    | 15                        | 21   | 5        | 1    | 2            | 1    | 6                           | 7    | 129                        | 134  | 1                                             | 0    | 114                          | 122  | 8                                     | 9    | 7         | 7    | 1                       | 1    | 0                                             |
| Finland                    | 515                | 411   | 54                 | 65   | 8                            | 7    | 0       | 0    | 3                                             | 3    | 2                           | 2    | 10                        | 12   | 0        | 3    | 0            | 0    | 4                           | 3    | 288                        | 160  | 1                                             | 0    | 135                          | 143  | 7                                     | 9    | 2         | 3    | 1                       | 1    | 0                                             |
| France                     | 520                | 395   | 46                 | 58   | 10                           | 9    | 0       | 0    | 4                                             | 5    | 3                           | 3    | 12                        | 14   | 3        | 3    | 1            | 0    | 3                           | 6    | 286                        | 135  | 1                                             | 0    | 138                          | 145  | 8                                     | 12   | 4         | 4    | 2                       | 1    | 0                                             |
| Germany                    | 609                | 438   | 65                 | 77   | 15                           | 15   | 0       | 0    | 3                                             | 3    | 2                           | 3    | 12                        | 14   | 3        | 4    | 0            | 0    | 5                           | 6    | 355                        | 158  | 1                                             | 0    | 135                          | 144  | 9                                     | 11   | 3         | 3    | 1                       | 1    | 0                                             |
| Guam                       | 1,272              | 1,208 | 214                | 271  | 154                          | 96   | 0       | 0    | 29                                            | 67   | 67                          | 58   | 88                        | 43   | 25       | 35   | 29           | 7    | 38                          | 46   | 340                        | 358  | 8                                             | 6    | 114                          | 119  | 19                                    | 24   | 13        | 20   | 136                     | 58   | 0                                             |
| Iceland                    | 563                | 416   | 67                 | 75   | 27                           | 17   | 0       | 0    | 3                                             | 2    | 2                           | 2    | 21                        | 19   | 2        | 2    | 1            | 0    | 4                           | 5    | 289                        | 136  | 0                                             | 0    | 137                          | 145  | 8                                     | 9    | 2         | 2    | 1                       | 1    | 0                                             |
| Ireland                    | 519                | 389   | 46                 | 55   | 13                           | 12   | 0       | 0    | 3                                             | 3    | 2                           | 2    | 15                        | 16   | 1        | 1    | 0            | 0    | 2                           | 5    | 289                        | 136  | 1                                             | 0    | 137                          | 143  | 8                                     | 11   | 3         | 3    | 1                       | 1    | 0                                             |
| Japan                      | 581                | 447   | 5                  | 6    | 32                           | 36   | 0       | 0    | 3                                             | 3    | 2                           | 2    | 12                        | 12   | 1        | 2    | 1            | 0    | 14                          | 9    | 336                        | 197  | 1                                             | 0    | 151                          | 158  | 18                                    | 14   | 5         | 6    | 1                       | 1    | 0                                             |
| Kuwait                     | 708                | 748   | 215                | 240  | 120                          | 115  | 0       | 0    | 5                                             | 6    | 1                           | 1    | 18                        | 23   | 4        | 2    | 8            | 4    | 31                          | 31   | 152                        | 156  | 1                                             | 1    | 120                          | 131  | 21                                    | 23   | 8         | 9    | 3                       | 7    | 0                                             |
| Latvia                     | 523                | 535   | 143                | 158  | 48                           | 32   | 0       | 0    | 16                                            | 17   | 2                           | 2    | 24                        | 29   | 10       | 3    | 3            | 2    | 11                          | 12   | 131                        | 137  | 1                                             | 0    | 116                          | 123  | 10                                    | 12   | 7         | 8    | 1                       | 1    | 0                                             |
| Lithuania                  | 545                | 548   | 152                | 143  | 65                           | 58   | 0       | 0    | 25                                            | 21   | 1                           | 1    | 21                        | 24   | 1        | 8    | 4            | 3    | 9                           | 10   | 134                        | 138  | 1                                             | 0    | 115                          | 123  | 9                                     | 10   | 7         | 9    | 1                       | 1    | 0                                             |
| Luxembourg                 | 551                | 418   | 69                 | 80   | 15                           | 12   | 0       | 0    | 2                                             | 2    | 3                           | 3    | 14                        | 13   | 1        | 2    | 0            | 0    | 4                           | 6    | 289                        | 136  | 1                                             | 0    | 135                          | 143  | 15                                    | 18   | 3         | 3    | 1                       | 1    | 0                                             |
| Monaco                     | 528                | 390   | 53                 | 63   | 23                           | 15   | 0       | 0    | 3                                             | 3    | 3                           | 3    | 7                         | 11   | 2        | 1    | 1            | 1    | 4                           | 5    | 289                        | 136  | 1                                             | 1    | 133                          | 140  | 6                                     | 7    | 3         | 4    | 1                       | 1    | 0                                             |
| Netherlands                | 494                | 397   | 45                 | 55   | 16                           | 13   | 0       | 0    | 9                                             | 13   | 3                           | 3    | 21                        | 18   | 3        | 2    | 0            | 0    | 4                           | 2    | 243                        | 134  | 1                                             | 0    | 136                          | 143  | 9                                     | 11   | 3         | 3    | 1                       | 1    | 0                                             |
| New Zealand                | 625                | 505   | 70                 | 77   | 10                           | 10   | 0       | 0    | 6                                             | 5    | 2                           | 2    | 16                        | 17   | 2        | 1    | 1            | 0    | 6                           | 12   | 342                        | 201  | 1                                             | 0    | 151                          | 155  | 9                                     | 16   | 4         | 4    | 5                       | 3    | 0                                             |
| Norway                     | 549                | 383   | 57                 | 68   | 10                           | 7    | 0       | 0    | 3                                             | 3    | 2                           | 2    | 14                        | 15   | 3        | 2    | 0            | 0    | 3                           | 7    | 296                        | 105  | 1                                             | 0    | 149                          | 157  | 7                                     | 13   | 3         | 4    | 1                       | 1    | 0                                             |
| Puerto Rico                | 876                | 864   | 147                | 150  | 33                           | 22   | 0       | 0    | 157                                           | 141  | 2                           | 2    | 21                        | 16   | 16       | 10   | 2            | 2    | 83                          | 91   | 252                        | 259  | 1                                             | 1    | 133                          | 138  | 19                                    | 23   | 8         | 8    | 2                       | 2    | 0                                             |
| Qatar                      | 648                | 646   | 192                | 206  | 84                           | 59   | 0       | 0    | 3                                             | 4    | 14                          | 11   | 32                        | 24   | 2        | 3    | 6            | 4    | 13                          | 12   | 155                        | 159  | 1                                             | 1    | 120                          | 130  | 14                                    | 17   | 9         | 11   | 2                       | 5    | 0                                             |
| Republic of Korea          | 586                | 456   | 9                  | 12   | 22                           | 22   | 0       | 0    | 4                                             | 7    | 7                           | 6    | 16                        | 21   | 1        | 2    | 5            | 4    | 20                          | 19   | 339                        | 197  | 2                                             | 1    | 139                          | 144  | 15                                    | 12   | 7         | 10   | 1                       | 1    | 0                                             |
| San Marino                 | 562                | 415   | 52                 | 63   | 10                           | 11   | 0       | 0    | 3                                             | 3    | 8                           | 6    | 25                        | 21   | 2        | 1    | 0            | 15   | 8                           | 284  | 135                        | 1    | 1                                             | 139  | 143                          | 18   | 15                                    | 5    | 6         | 1    | 1                       | 0    |                                               |
| Singapore                  | 624                | 495   | 5                  | 7    | 63                           | 69   | 0       | 0    | 8                                             | 8    | 2                           | 2    | 17                        | 23   | 1        | 2    | 2            | 1    | 21                          | 18   | 344                        | 197  | 1                                             | 0    | 139                          | 146  | 14                                    | 12   | 5         | 7    | 2                       | 2    | 0                                             |
| Slovakia                   | 608                | 660   | 180                | 235  | 82                           | 70   | 0       | 0    | 10                                            | 10   | 9                           | 7    | 21                        | 21   | 0        | 0    | 1            | 1    | 15                          | 16   | 165                        | 169  | 1                                             | 1    | 102                          | 107  | 14                                    | 14   | 7         | 7    | 2                       | 1    | 0                                             |
| Slovenia                   | 525                | 533   | 162                | 171  | 15                           | 14   | 0       | 0    | 34                                            | 23   | 1                           | 1    | 12                        | 11   | 2        | 1    | 1            | 1    | 11                          | 13   | 166                        | 170  | 1                                             | 0    | 102                          | 107  | 11                                    | 13   | 6         | 7    | 1                       | 1    | 0                                             |
| Sweden                     | 576                | 408   | 58                 | 71   | 11                           | 9    | 0       | 0    | 4                                             | 4    | 2                           | 4    | 11                        | 9    | 2        | 2    | 0            | 0    | 4                           | 6    | 323                        | 135  | 1                                             | 0    | 148                          | 155  | 10                                    | 11   | 2         | 2    | 1                       | 1    | 0                                             |
| Switzerland                | 525                | 388   | 53                 | 61   | 9                            | 7    | 0       | 0    | 4                                             | 7    | 4                           | 2    | 11                        | 9    | 2        | 2    | 0            | 0    | 3                           | 5    | 290                        | 136  | 1                                             | 0    | 136                          | 144  | 8                                     | 10   | 3         | 3    | 1                       | 1    | 0                                             |
| Taiwan (Province of China) | 686                | 730   | 104                | 123  | 51                           | 55   | 0       | 0    | 8                                             | 6    | 2                           | 2    | 24                        | 30   | 2        | 3    | 13           | 10   | 47                          | 45   | 308                        | 314  | 1                                             | 1    | 99                           | 106  | 19                                    | 18   | 8         | 15   | 2                       | 2    | 0                                             |
| United Arab Emirates       | 733                | 779   | 263                | 262  | 36                           | 66   | 0       | 0    | 4                                             | 5    | 19                          | 18   | 26                        | 35   | 6        | 6    | 10           | 9    | 30                          | 24   | 153                        | 157  | 1                                             | 1    | 119                          | 130  | 30                                    | 22   | 10        | 11   | 25                      | 32   | 0                                             |
| United Kingdom             | 552                | 427   | 51                 | 63   | 21                           | 19   | 0       | 0    | 3                                             | 3    | 4                           | 4    | 20                        | 22   | 3        | 2    | 1            | 1    | 10                          | 10   | 273                        | 127  | 1                                             | 0    | 148                          | 155  | 13                                    | 15   | 4         | 4    | 1                       | 1    | 0                                             |
| United States of America   | 580                | 581   | 74                 | 81   | 26                           | 26   | 0       | 0    | 6                                             | 8    | 3                           | 3    | 12                        | 13   | 3        | 3    | 0            | 0    | 10                          | 8    | 262                        | 256  | 1                                             | 0    | 162                          | 161  | 16                                    | 15   | 4         | 4    | 1                       | 1    | 0                                             |



**S13 (B)** Percentage change in DALYs/100,000 for each communicable condition for each location for 5-14 year age group by sex. The colours on this heat map are green for values less than 0, the darker the green the greater the reduction in DALYs/100,000 between 1990 and 2019, the orange tones represent positive numbers, an increase in DALYs/ 100,000, with darker shades indicating worse outcome.

|                             | 5 to 14            |       |                    |       |                              |       |         |       |                                               |        |                             |       |                           |       |           |           |              |       |                             |       |                            |       |                                               |       |                              |       |                                       |       |           |       |                         |       |                                               |
|-----------------------------|--------------------|-------|--------------------|-------|------------------------------|-------|---------|-------|-----------------------------------------------|--------|-----------------------------|-------|---------------------------|-------|-----------|-----------|--------------|-------|-----------------------------|-------|----------------------------|-------|-----------------------------------------------|-------|------------------------------|-------|---------------------------------------|-------|-----------|-------|-------------------------|-------|-----------------------------------------------|
|                             | Total communicable |       | Enteric infections |       | Lower respiratory infections |       | Malaria |       | Neonatal sepsis and other neonatal infections |        | Vaccine Preventable disease |       | Meningitis & Encephalitis |       | HIV/AIDS  |           | Tuberculosis |       | Neglected Tropical diseases |       | Infectious skin conditions |       | Sexually transmitted infections excluding HIV |       | Upper respiratory infections |       | Other unspecified infectious diseases |       | Hepatitis |       | Rheumatic heart disease |       | Maternal sepsis and other maternal infections |
|                             | Female             | Male  | Female             | Male  | Female                       | Male  | Female  | Male  | Female                                        | Male   | Female                      | Male  | Female                    | Male  | Female    | Male      | Female       | Male  | Female                      | Male  | Female                     | Male  | Female                                        | Male  | Female                       | Male  | Female                                | Male  | Female    | Male  | Female                  | Male  | Female                                        |
| Afghanistan                 | -2.2%              | -2.2% | -0.6%              | 0.2%  | -1.9%                        | -1.8% | -1.5%   | -1.5% | 43.2%                                         | 54.1%  | -3.0%                       | -3.0% | -1.6%                     | -1.4% | 14.8%     | 14.6%     | -2.5%        | -2.6% | -1.4%                       | -1.9% | 0.0%                       | 0.0%  | 0.0%                                          | -0.4% | -0.1%                        | -0.1% | -1.2%                                 | -1.3% | -2.3%     | -2.5% | -2.0%                   | -1.8% | -2.4%                                         |
| Benin                       | -1.4%              | -1.3% | -1.2%              | -1.1% | -1.2%                        | -1.4% | 1.0%    | 1.4%  | 41.0%                                         | 35.4%  | -2.5%                       | -2.6% | -1.6%                     | -1.6% | 14,739.4% | 16,318.1% | -2.0%        | -2.3% | -2.3%                       | -2.2% | -0.1%                      | -0.2% | -1.7%                                         | -1.4% | -0.1%                        | -0.2% | 0.5%                                  | 1.3%  | -1.1%     | -2.3% | -0.9%                   | -0.9% | -2.0%                                         |
| Burkina Faso                | -1.6%              | -1.6% | -1.1%              | -1.1% | -0.1%                        | -0.4% | -1.3%   | -1.4% | 44.7%                                         | 57.1%  | -2.9%                       | -3.0% | -1.3%                     | -1.2% | -0.5%     | -0.2%     | -1.4%        | -1.7% | -2.4%                       | -2.5% | -0.1%                      | -0.1% | -1.1%                                         | -0.7% | -0.1%                        | -0.2% | 2.9%                                  | 1.5%  | -1.0%     | -2.1% | -0.0%                   | -0.3% | -1.2%                                         |
| Burundi                     | -1.8%              | -1.8% | -1.7%              | -1.4% | -1.1%                        | -1.6% | -1.9%   | -2.0% | 54.6%                                         | 65.0%  | -3.1%                       | -3.1% | -1.3%                     | -1.5% | 3.8%      | 4.7%      | -1.8%        | -2.2% | 2.1%                        | -2.0% | -0.1%                      | -0.2% | -1.1%                                         | -2.2% | -0.5%                        | -0.6% | -1.1%                                 | -1.1% | -1.0%     | -1.5% | -1.3%                   | -1.5% | 0.7%                                          |
| Central African Republic    | -1.0%              | -1.1% | -0.6%              | -0.3% | -0.6%                        | -0.6% | 0.7%    | 0.9%  | 22.3%                                         | 24.4%  | -2.2%                       | -2.3% | -1.2%                     | -1.1% | 816.4%    | 940.0%    | -0.4%        | -0.5% | -2.6%                       | -2.7% | -0.1%                      | -0.0% | -0.7%                                         | -1.3% | -0.4%                        | -0.3% | 0.3%                                  | 0.3%  | -0.8%     | -1.7% | -0.5%                   | -0.6% | 0.4%                                          |
| Chad                        | -1.0%              | -1.1% | -0.3%              | -0.5% | 0.1%                         | -0.3% | -0.3%   | -0.1% | 38.0%                                         | 44.3%  | -2.5%                       | -2.5% | -0.0%                     | -0.2% | 102.2%    | 106.2%    | -0.7%        | -0.9% | -1.2%                       | -1.3% | -0.0%                      | -0.1% | -0.7%                                         | -0.7% | -0.0%                        | -0.2% | 0.2%                                  | 0.2%  | -1.0%     | -0.5% | -0.6%                   | -1.2% |                                               |
| Côte d'Ivoire               | -1.3%              | -1.3% | -1.0%              | -0.9% | -1.1%                        | -1.4% | -0.6%   | -0.4% | 22.5%                                         | 39.7%  | -3.0%                       | -3.1% | -1.4%                     | -1.6% | 42.2%     | 47.0%     | -1.5%        | -2.1% | -2.6%                       | -2.5% | -0.0%                      | -0.0% | -1.6%                                         | -1.6% | -0.0%                        | -0.2% | 0.1%                                  | 0.6%  | -1.0%     | -2.1% | -0.9%                   | -0.8% | -1.7%                                         |
| Dem Rep of the Congo        | -1.6%              | -1.6% | -1.2%              | -0.6% | -1.5%                        | -1.6% | -0.9%   | -0.8% | 40.4%                                         | 38.3%  | -2.7%                       | -2.7% | -1.6%                     | -1.7% | 2.2%      | 2.8%      | -1.7%        | -2.3% | -2.2%                       | -2.4% | -0.2%                      | -0.2% | -1.9%                                         | -2.1% | -0.3%                        | -0.3% | -0.2%                                 | -0.3% | -1.0%     | -2.0% | -1.0%                   | -0.9% | 1.5%                                          |
| Eritrea                     | 2.1%               | -2.0% | -2.3%              | -1.7% | -1.1%                        | -1.2% | -2.5%   | -2.6% | 63.5%                                         | 66.4%  | -3.1%                       | -3.2% | -1.1%                     | -1.3% | 42.3%     | 45.9%     | -2.9%        | -2.1% | -2.5%                       | -2.8% | 0.2%                       | -0.2% | -0.6%                                         | -2.3% | -0.4%                        | -0.5% | -1.3%                                 | -1.6% | -1.1%     | -1.6% | -1.0%                   | -1.2% | -1.6%                                         |
| Ethiopia                    | -2.4%              | -2.4% | -2.6%              | -2.1% | -2.3%                        | -2.4% | -0.1%   | 1.9%  | 83.5%                                         | 95.7%  | -3.1%                       | -3.1% | -2.3%                     | -2.5% | 26.0%     | 24.3%     | -2.7%        | -2.8% | -2.6%                       | -2.8% | -0.3%                      | -0.3% | -2.2%                                         | -2.5% | -1.0%                        | -1.1% | -0.8%                                 | -0.7% | -1.9%     | -1.9% | -1.6%                   | -1.9% | -2.4%                                         |
| Gambia                      | -1.9%              | -1.9% | -1.6%              | -1.3% | -1.3%                        | -1.5% | -2.5%   | -2.5% | 14.5%                                         | 28.0%  | -3.1%                       | -3.1% | -1.8%                     | -1.8% | 432.7%    | 489.4%    | -1.9%        | -2.0% | -1.7%                       | -1.8% | -0.1%                      | -0.1% | -1.4%                                         | -1.2% | -0.0%                        | -0.2% | -0.2%                                 | -0.1% | -0.9%     | -1.0% | -0.8%                   | -0.7% | -1.9%                                         |
| Guinea                      | -1.4%              | -1.3% | -0.9%              | -0.8% | -0.7%                        | -0.6% | 0.1%    | -0.0% | 64.0%                                         | 61.4%  | -2.8%                       | -2.8% | -0.9%                     | -0.9% | 196.5%    | 231.1%    | -1.7%        | -1.8% | -1.1%                       | -1.4% | -0.1%                      | -0.1% | -1.7%                                         | -1.5% | -0.0%                        | -0.2% | 0.9%                                  | 1.1%  | -0.7%     | -1.3% | -1.0%                   | -0.7% | -1.7%                                         |
| Guinea-Bissau               | -1.9%              | -1.9% | -1.9%              | -1.6% | -1.8%                        | -1.9% | -2.3%   | -2.2% | 63.0%                                         | 117.8% | -2.5%                       | -2.5% | -1.8%                     | -2.0% | 186.5%    | 198.6%    | -2.3%        | -2.5% | -1.5%                       | -1.9% | -0.1%                      | -0.1% | -2.1%                                         | -2.1% | -0.0%                        | -0.4% | 0.7%                                  | 0.6%  | -1.5%     | -2.4% | -1.4%                   | -1.5% | -2.4%                                         |
| Haiti                       | -1.2%              | -1.2% | -1.9%              | -0.8% | -1.5%                        | -1.6% | -1.6%   | -1.2% | 46.9%                                         | 66.3%  | -3.3%                       | -2.5% | -1.9%                     | -2.0% | 67.7%     | 68.1%     | -2.0%        | -2.8% | -1.0%                       | -2.3% | 0.0%                       | 0.0%  | -0.6%                                         | -1.5% | -0.4%                        | 0.3%  | 0.1%                                  | -2.0% | -1.8%     | -1.6% | -1.6%                   | -0.6% |                                               |
| Liberia                     | -1.5%              | -1.6% | -0.9%              | -0.8% | -1.6%                        | -1.9% | 0.6%    | 0.2%  | 93.9%                                         | 116.0% | -3.0%                       | -3.1% | -1.9%                     | -2.1% | 293.6%    | 296.1%    | -2.3%        | -2.7% | -1.4%                       | -1.8% | -0.2%                      | -0.3% | -0.7%                                         | -0.6% | 0.0%                         | -0.1% | -0.8%                                 | -0.6% | -1.2%     | -2.2% | -1.2%                   | -0.9% | -1.8%                                         |
| Madagascar                  | -2.0%              | -2.0% | -1.7%              | -1.0% | -2.3%                        | -2.5% | -1.5%   | -2.0% | 37.8%                                         | 54.3%  | -2.6%                       | -2.7% | -2.3%                     | -2.5% | 155,892.5 | 169,917.5 | -2.5%        | -2.9% | -1.7%                       | -2.3% | -0.1%                      | -0.1% | -1.4%                                         | -2.0% | -0.7%                        | -0.8% | -1.5%                                 | -1.9% | -1.9%     | -2.5% | -2.0%                   | -2.0% | -1.9%                                         |
| Malawi                      | -1.8%              | -1.7% | -1.9%              | -1.6% | -2.2%                        | -2.0% | -2.1%   | -2.2% | 57.7%                                         | 74.9%  | -3.1%                       | -3.1% | -2.2%                     | -2.1% | 22.7%     | 28.4%     | -2.3%        | -2.5% | -2.6%                       | -2.7% | -0.1%                      | -0.1% | -0.9%                                         | -1.4% | -0.7%                        | -0.6% | -0.5%                                 | -0.4% | -1.9%     | -2.4% | -1.5%                   | -1.3% | -1.6%                                         |
| Mali                        | -1.9%              | -1.7% | -1.2%              | -0.2% | -1.3%                        | -1.3% | -2.0%   | -1.8% | 88.3%                                         | 70.6%  | -2.9%                       | -2.9% | -1.7%                     | -1.6% | 128.2%    | 138.3%    | -1.0%        | -1.6% | -1.7%                       | -2.3% | -0.1%                      | -0.1% | -1.1%                                         | -0.8% | -0.1%                        | -0.3% | 0.5%                                  | 1.1%  | -1.6%     | -2.6% | -1.2%                   | -0.9% | -2.1%                                         |
| Mozambique                  | -1.0%              | -1.1% | -2.0%              | -0.9% | -1.8%                        | -1.5% | -1.3%   | -1.5% | 62.6%                                         | 65.5%  | -3.2%                       | -2.2% | -2.1%                     | -1.9% | 497.1%    | 497.6%    | -2.3%        | -2.7% | 1.9%                        | -2.4% | -0.1%                      | -0.1% | -2.4%                                         | -2.5% | -0.9%                        | -0.8% | -0.2%                                 | -0.2% | -1.8%     | -2.3% | -1.2%                   | -0.9% | -2.6%                                         |
| Nepal                       | -2.4%              | -2.3% | -2.2%              | -2.0% | -2.5%                        | -2.5% | -3.2%   | -3.2% | 118.8%                                        | 98.9%  | -3.0%                       | -3.1% | -1.7%                     | -1.5% | 8.1e+14%  | 7.0e+14%  | -2.9%        | -3.0% | -2.4%                       | -2.7% | -0.1%                      | -0.1% | -1.5%                                         | -1.8% | -0.5%                        | -0.4% | 0.4%                                  | 0.0%  | -2.6%     | -2.2% | -2.1%                   | -1.5% | -3.2%                                         |
| Niger                       | -1.6%              | -1.7% | -1.3%              | -0.9% | -1.5%                        | -1.8% | -1.1%   | -0.9% | 78.7%                                         | 83.8%  | -2.2%                       | -2.4% | -1.7%                     | -2.0% | 77.8%     | 77.7%     | -2.2%        | -2.5% | -1.3%                       | -2.0% | -0.2%                      | -0.3% | -2.1%                                         | -1.9% | 0.2%                         | -0.1% | -0.2%                                 | -0.4% | -1.3%     | -2.1% | -1.2%                   | -1.2% | -1.2%                                         |
| Pakistan                    | -1.4%              | -1.2% | -0.2%              | -0.6% | 0.7%                         | 1.0%  | -2.2%   | -2.2% | 21.1%                                         | 17.9%  | -3.1%                       | -3.1% | -0.1%                     | 0.2%  | 61.6%     | 59.8%     | -1.3%        | -0.9% | -1.7%                       | -1.8% | -0.0%                      | -0.0% | 0.6%                                          | 0.4%  | -0.2%                        | -0.1% | 0.2%                                  | 0.1%  | -1.4%     | -0.9% | 0.5%                    | 1.5%  | -2.2%                                         |
| Papua New Guinea            | -1.4%              | -1.5% | -1.6%              | -1.5% | -1.2%                        | -1.1% | -1.7%   | -1.9% | 3.3%                                          | 12.3%  | -2.3%                       | -2.4% | -1.7%                     | -1.6% | 50,880.9% | 63,630.0% | -1.9%        | -1.8% | -1.3%                       | -1.8% | 0.0%                       | 0.0%  | -0.4%                                         | -0.3% | -0.1%                        | -0.1% | -0.2%                                 | 0.0%  | -1.9%     | -2.3% | -0.2%                   | -0.2% | -2.2%                                         |
| Rwanda                      | -2.4%              | -2.4% | -2.6%              | -2.3% | -2.1%                        | -2.3% | -2.7%   | -2.8% | 74.4%                                         | 87.8%  | -3.1%                       | -3.1% | -2.2%                     | -2.3% | 10.1%     | 12.6%     | -2.8%        | -2.8% | -2.2%                       | -2.3% | -0.4%                      | -0.4% | -1.6%                                         | -2.2% | -0.5%                        | -0.6% | -1.2%                                 | -2.2% | -2.0%     | -2.5% | -1.9%                   | -2.1% | -2.5%                                         |
| Senegal                     | -1.8%              | -1.7% | -1.7%              | -1.5% | -1.6%                        | -1.8% | -1.6%   | -1.8% | 38.9%                                         | 37.6%  | -2.8%                       | -2.8% | -1.6%                     | -1.7% | 102.8%    | 116.1%    | -2.2%        | -2.5% | -1.6%                       | -1.7% | -0.1%                      | -0.2% | -2.0%                                         | -1.9% | 0.0%                         | -0.2% | -0.5%                                 | -0.3% | -1.7%     | -2.1% | -1.0%                   | -0.9% | -2.1%                                         |
| Sierra Leone                | -1.1%              | -1.3% | -1.0%              | -0.4% | -0.5%                        | -1.2% | -0.7%   | -0.7% | 43.5%                                         | 46.7%  | -2.9%                       | -3.0% | -1.2%                     | -1.6% | 961.6%    | 339.3%    | -1.6%        | -2.4% | -2.0%                       | -2.3% | -0.2%                      | -0.2% | -1.5%                                         | -1.6% | -0.0%                        | -0.2% | 0.4%                                  | 0.2%  | -0.8%     | -2.3% | -0.8%                   | -1.0% | -0.9%                                         |
| Solomon Islands             | -1.5%              | -1.6% | -1.5%              | -1.4% | -1.4%                        | -1.7% | -2.3%   | -2.1% | 2.7%                                          | 5.7%   | -2.9%                       | -2.9% | -1.6%                     | -1.6% | 508.0%    | 545.3%    | -1.6%        | -1.7% | -0.5%                       | -0.7% | -0.0%                      | 0.0%  | 0.8%                                          | 1.2%  | -0.0%                        | -0.0% | -0.5%                                 | -0.3% | -1.7%     | -2.5% | -1.0%                   | -1.0% | -0.8%                                         |
| Somalia                     | -1.5%              | -1.7% | -0.7%              | 0.1%  | 0.5%                         | 1.0%  | -1.5%   | -0.9% | 26.8%                                         | 28.0%  | -3.0%                       | -1.7% | 1.2%                      | 1.9%  | 2,644.8%  | 2,627.3%  | 0.2%         | 0.0%  | -3.0%                       | -3.0% | -0.0%                      | -0.1% | 1.2%                                          | 0.1%  | 0.1%                         | 0.4%  | -0.9%                                 | -1.0% | 0.4%      | 1.0%  | -0.1%                   | 0.2%  | 2.3%                                          |
| South Sudan                 | -1.4%              | -1.5% | -0.0%              | 0.6%  | -0.6%                        | -0.1% | -0.3%   | 0.3%  | 38.8%                                         | 41.4%  | -2.5%                       | -2.4% | 0.1%                      | 0.6%  | 340.4%    | 379.0%    | -0.9%        | -0.9% | -2.3%                       | -2.4% | -0.0%                      | -0.0% | 0.9%                                          | 0.3%  | -0.2%                        | -0.1% | -0.7%                                 | -0.9% | 0.4%      | 0.9%  | -0.4%                   | -0.1% | 0.3%                                          |
| Togo                        | -1.3%              | -1.2% | -0.9%              | -0.9% | -1.6%                        | -1.5% | -0.6%   | -0.6% | 30.3%                                         | 34.5%  | -3.0%                       | -3.0% | -1.8%                     | -1.7% | 165.1%    | 194.3%    | -1.9%        | -2.1% | -1.7%                       | -2.0% | -0.1%                      | -0.1% | -2.1%                                         | -1.9% | -0.0%                        | -0.2% | 0.6%                                  | 0.5%  | -1.4%     | -2.3% | -1.2%                   | -0.9% | -2.1%                                         |
| Uganda                      | -1.8%              | -1.8% | -1.0%              | -0.7% | -0.3%                        | -0.7% | -1.7%   | -1.6% | 45.2%                                         | 50.3%  | -2.4%                       | -2.6% | -0.9%                     | -1.1% | -1.6%     | -1.3%     | -1.5%        | -2.2% | -3.0%                       | -3.0% | -0.0%                      | -0.1% | 2.9%                                          | 1.2%  | -0.3%                        | -0.4% | -0.8%                                 | -1.4% | -0.5%     | -0.9% | -0.1%                   | -0.5% | -1.0%                                         |
| United Republic of Tanzania | -1.7%              | -1.8% | -1.6%              | -1.5% | -1.6%                        | -1.8% | -2.2%   | -2.2% | 40.8%                                         | 41.7%  | -2.8%                       | -2.9% | -1.2%                     | -1.3% | 10.9%     | 13.0%     | -1.9%        | -2.4% | -2.3%                       | -2.4% | -0.3%                      | -0.3% | -1.9%                                         | -2.1% | -0.3%                        | -0.3% | -0.3%                                 | -0.6% | -1.4%     | -1.8% | -1.0%                   | -1.1% | -1.5%                                         |
| Yemen                       | -2.3%              | -2.3% | -0.7%              | -0.2% | -1.5%                        | -1.3% | -3.1%   | -3.1% | 22.6%                                         | 28.3%  | -3.1%                       | -3.1% | -1.5%                     | -1.3% | 14.0%     | 14.0%     | -2.5%        | -2.6% | -2.0%                       | -2.4% | -0.1%                      | -0.1% | -0.2%                                         | -0.2% | -0.2%                        | -0.3% | 1.9%                                  | 1.6%  | -2.5%     | -2.7% | -1.6%                   | -1.4% | -2.1%                                         |

|                                       | 5 to 14            |       |                    |       |                              |       |         |        |                                               |        |                             |       |                           |       |            |            |              |       |                             |       |                            |       |                                               |       |                              |       |                                       |       |           |       |                         |       |                                               |
|---------------------------------------|--------------------|-------|--------------------|-------|------------------------------|-------|---------|--------|-----------------------------------------------|--------|-----------------------------|-------|---------------------------|-------|------------|------------|--------------|-------|-----------------------------|-------|----------------------------|-------|-----------------------------------------------|-------|------------------------------|-------|---------------------------------------|-------|-----------|-------|-------------------------|-------|-----------------------------------------------|
|                                       | Total communicable |       | Enteric infections |       | Lower respiratory infections |       | Malaria |        | Neonatal sepsis and other neonatal infections |        | Vaccine Preventable disease |       | Meningitis & Encephalitis |       | HIV/AIDS   |            | Tuberculosis |       | Neglected Tropical diseases |       | Infectious skin conditions |       | Sexually transmitted infections excluding HIV |       | Upper respiratory infections |       | Other unspecified infectious diseases |       | Hepatitis |       | Rheumatic heart disease |       | Maternal sepsis and other maternal infections |
|                                       | Female             | Male  | Female             | Male  | Female                       | Male  | Female  | Male   | Female                                        | Male   | Female                      | Male  | Female                    | Male  | Female     | Male       | Female       | Male  | Female                      | Male  | Female                     | Male  | Female                                        | Male  | Female                       | Male  | Female                                | Male  | Female    | Male  | Female                  | Male  | Female                                        |
| Angola                                | -2.0%              | -2.1% | -2.3%              | -1.7% | -1.9%                        | -1.9% | -0.1%   | 0.1%   | 74.8%                                         | 102.3% | -2.8%                       | -2.9% | -2.0%                     | -2.1% | 529.6%     | 554.9%     | -2.5%        | -2.7% | -2.9%                       | -3.0% | -0.3%                      | -0.3% | -1.5%                                         | -1.9% | -0.5%                        | -0.6% | -0.2%                                 | -0.8% | -1.6%     | -2.6% | -1.3%                   | -1.4% | -1.8%                                         |
| Bangladesh                            | -2.5%              | -2.5% | -2.0%              | -1.9% | -2.1%                        | -2.1% | -3.3%   | -3.3%  | 124.4%                                        | 207.6% | -3.1%                       | -3.0% | -1.2%                     | -0.4% |            |            | -2.8%        | -2.9% | -2.3%                       | -2.5% | -0.1%                      | -0.1% | -1.4%                                         | -2.1% | -0.5%                        | -0.3% | -1.5%                                 | -1.2% | -2.6%     | -2.7% | -0.9%                   | -1.1% | -3.1%                                         |
| Belize                                | -0.9%              | -1.2% | -0.4%              | -0.8% | -1.5%                        | -1.5% | -3.3%   | -3.3%  | 9.8%                                          | 7.2%   | -2.4%                       | -2.6% | -2.2%                     | -2.4% | -1.7%      | -2.2%      | -2.7%        | -2.7% | -0.9%                       | -0.7% | -0.0%                      | -0.1% | 0.2%                                          | -0.2% | -0.2%                        | -0.3% | -0.7%                                 | -0.5% | -2.5%     | -2.0% | -1.4%                   | -1.2% | -2.0%                                         |
| Bhutan                                | -2.5%              | -2.5% | -1.6%              | -1.4% | -1.5%                        | -1.0% | -3.3%   | -3.3%  | 128.9%                                        | 103.7% | -3.3%                       | -3.3% | -1.4%                     | -1.1% | 226.6%     | 209.6%     | -2.7%        | -2.5% | -1.8%                       | -2.0% | -0.1%                      | -0.1% | 1.1%                                          | 1.8%  | -0.3%                        | -0.2% | -0.0%                                 | 0.2%  | -2.0%     | -2.1% | -1.2%                   | -0.3% | -2.5%                                         |
| Bolivia (Plurinational State of)      | -2.2%              | -3.0% | -2.2%              | -1.7% | -2.3%                        | -2.2% | -3.3%   | -3.3%  | 22.5%                                         | 18.3%  | -2.9%                       | -2.9% | -2.3%                     | -2.2% | 43.3%      | 38.2%      | -3.0%        | -3.0% | -2.2%                       | -2.1% | -0.1%                      | -0.0% | -1.8%                                         | -2.1% | -0.2%                        | -0.2% | -1.4%                                 | -1.0% | -2.2%     | -2.2% | -1.7%                   | -1.6% | -2.9%                                         |
| Cabo Verde                            | -2.1%              | -1.8% | -2.2%              | -2.1% | -2.1%                        | -1.2% | 0.4%    | 0.2%   | 16.9%                                         | 15.0%  | -3.3%                       | -3.3% | -2.0%                     | -1.3% | 21.7%      | 30.5%      | -2.8%        | -2.6% | -1.6%                       | -1.2% | -0.2%                      | -0.3% | -1.1%                                         | -0.9% | -0.2%                        | -0.2% | -0.7%                                 | -0.9% | -1.9%     | -2.2% | -1.7%                   | -1.1% | -2.9%                                         |
| Cambodia                              | -2.5%              | -2.4% | -2.5%              | -2.2% | -2.5%                        | -2.4% | -3.1%   | -3.1%  | 48.1%                                         | 47.4%  | -3.2%                       | -3.2% | -1.9%                     | -1.7% | 24,979.2%  | 26,274.2%  | -2.8%        | -2.7% | -2.5%                       | -2.6% | -0.1%                      | -0.1% | -1.3%                                         | -1.8% | -0.5%                        | -0.4% | -1.1%                                 | -0.8% | -2.1%     | -1.8% | -2.2%                   | -2.0% | -3.0%                                         |
| Cameroon                              | -1.4%              | -1.4% | -1.0%              | -0.9% | -0.6%                        | -0.7% | 0.7%    | 0.5%   | 29.0%                                         | 43.6%  | -2.9%                       | -2.9% | -1.4%                     | -1.4% | 311.9%     | 361.1%     | -1.6%        | -1.9% | -2.4%                       | -2.4% | -0.2%                      | -0.2% | -1.9%                                         | -1.9% | 0.0%                         | -0.1% | -1.0%                                 | -1.0% | -0.8%     | -1.2% | -0.7%                   | -0.5% | -1.8%                                         |
| Comoros                               | -1.9%              | -1.9% | -1.7%              | -1.3% | -1.0%                        | -1.4% | -2.7%   | -2.8%  | 34.7%                                         | 43.1%  | -2.3%                       | -2.5% | -0.8%                     | -1.1% | 423.6%     | 502.4%     | -1.9%        | -2.5% | -1.3%                       | -1.8% | -0.2%                      | -0.2% | -1.5%                                         | -2.1% | -0.3%                        | -0.4% | -1.0%                                 | -1.3% | -0.9%     | -2.2% | -1.2%                   | -1.3% | -1.6%                                         |
| Congo                                 | -1.5%              | -1.7% | -1.8%              | -1.5% | -1.4%                        | -1.6% | -0.3%   | -1.0%  | 18.1%                                         | 30.8%  | -2.0%                       | -2.2% | -1.6%                     | -1.9% | 2.0%       | 3.3%       | -2.0%        | -2.3% | -2.9%                       | -3.0% | -0.2%                      | -0.2% | -1.3%                                         | -1.7% | -0.2%                        | -0.3% | -0.0%                                 | -0.5% | -1.3%     | -2.0% | -0.7%                   | -1.1% | -1.7%                                         |
| Democratic People's Republic of Korea | -1.9%              | -1.7% | 0.3%               | 0.4%  | -2.5%                        | -2.4% | 194.2%  | 207.0% | 9.2%                                          | 12.7%  | -3.2%                       | -3.2% | -1.9%                     | -1.7% | 688.4%     | 638.9%     | -2.0%        | -1.9% | -1.7%                       | -1.8% | -0.1%                      | -0.1% | -1.0%                                         | -0.9% | -0.2%                        | -0.2% | -0.9%                                 | -1.0% | -1.9%     | -2.2% | -1.3%                   | -0.9% | -2.1%                                         |
| Djibouti                              | -1.5%              | -1.6% | -1.5%              | -1.2% | -1.0%                        | -0.7% | -0.9%   | -0.8%  | 19.6%                                         | 28.9%  | -2.6%                       | -2.6% | -0.8%                     | -0.6% | 72,533.5%  | 85,676.9%  | -1.9%        | -2.1% | -2.8%                       | -2.9% | -0.1%                      | -0.1% | -0.2%                                         | -1.3% | -0.3%                        | -0.2% | -1.1%                                 | -1.2% | -1.0%     | -0.9% | -1.0%                   | -0.9% | -0.4%                                         |
| Dominican Republic                    | -0.8%              | -1.0% | -0.4%              | -1.0% | -1.5%                        | -1.3% | -2.9%   | -2.9%  | 32.4%                                         | 16.2%  | -2.0%                       | -2.2% | -1.9%                     | -1.9% | 347.3%     | 347.0%     | -2.6%        | -2.5% | -0.9%                       | -1.5% | -0.0%                      | -0.1% | -0.8%                                         | -1.0% | 0.0%                         | -0.1% | -1.4%                                 | -1.3% | -1.8%     | -1.7% | -1.4%                   | -1.4% | -1.9%                                         |
| El Salvador                           | -1.6%              | -1.5% | -1.9%              | -2.0% | -2.1%                        | -1.8% | -3.2%   | -3.2%  | -0.1%                                         | -0.2%  | -2.8%                       | -2.8% | -2.7%                     | -2.6% | 75.3%      | 66.6%      | -3.1%        | -3.1% | -1.4%                       | -1.5% | -0.0%                      | -0.0% | -1.2%                                         | -1.1% | -0.2%                        | -0.1% | -1.2%                                 | -0.9% | -0.7%     | -1.1% | -1.2%                   | -0.8% | -3.2%                                         |
| Eswatini                              | 0.0%               | -0.0% | -1.1%              | -1.1% | -0.9%                        | -0.1% | -2.8%   | -2.9%  | 8.2%                                          | 9.0%   | -3.1%                       | -3.1% | -1.2%                     | -0.7% | 196,694.5% | 206,193.7% | -1.2%        | -0.8% | -2.3%                       | -2.0% | -0.0%                      | -0.0% | -1.9%                                         | -2.0% | -0.2%                        | -0.3% | -0.3%                                 | -0.3% | -1.2%     | -1.4% | -1.1%                   | -0.9% | -2.0%                                         |
| Ghana                                 | -1.7%              | -1.6% | -1.7%              | -1.8% | -1.6%                        | -1.6% | -0.8%   | -0.7%  | 34.2%                                         | 57.6%  | -3.1%                       | -3.1% | -1.9%                     | -1.6% | 40.7%      | 43.6%      | -2.4%        | -2.4% | -2.1%                       | -2.0% | -0.2%                      | -0.2% | -1.1%                                         | -1.0% | -0.1%                        | -0.1% | 0.9%                                  | 2.6%  | -1.9%     | -2.2% | -0.6%                   | -0.4% | -2.4%                                         |
| Guatemala                             | -2.6%              | -2.6% | -2.9%              | -2.8% | -2.7%                        | -2.7% | -3.1%   | -3.2%  | 4.9%                                          | 6.8%   | -3.2%                       | -3.2% | -2.1%                     | -2.2% | -1.0%      | 1.6%       | -3.2%        | -3.2% | -2.7%                       | -2.7% | -0.1%                      | -0.1% | -1.0%                                         | -2.6% | -0.5%                        | -0.3% | -0.8%                                 | -0.8% | -1.6%     | -1.5% | -1.1%                   | -0.9% | -3.1%                                         |
| Honduras                              | -2.1%              | -1.8% | -2.6%              | -2.3% | -3.2%                        | -2.5% | -3.2%   | -3.2%  | 9.4%                                          | 8.7%   | -2.9%                       | -2.8% | -2.4%                     | -2.2% | -1.6%      | -1.6%      | -3.0%        | -2.8% | 0.2%                        | -0.4% | -0.1%                      | -0.1% | -2.3%                                         | -1.2% | -0.6%                        | -0.4% | -1.9%                                 | -2.1% | -2.6%     | -2.2% | -0.1%                   | 0.0%  | -3.2%                                         |
| India                                 | -2.4%              | -2.2% | -2.3%              | -2.2% | -2.4%                        | -2.2% | -2.9%   | -2.8%  | 31.6%                                         | 30.5%  | -3.1%                       | -3.1% | -2.3%                     | -2.2% | 6,257.7%   | 7,160.1%   | -2.8%        | -2.7% | -2.0%                       | -2.0% | -0.2%                      | -0.2% | -1.8%                                         | -1.7% | -0.4%                        | -0.3% | -1.0%                                 | -1.0% | -2.3%     | -1.9% | -1.9%                   | -1.6% | -3.1%                                         |
| Kenya                                 | -1.1%              | -1.1% | -1.4%              | -1.3% | -1.2%                        | -0.8% | -1.7%   | -1.7%  | 9.5%                                          | 9.0%   | -2.8%                       | -2.8% | -1.5%                     | -1.3% | 32.9%      | 36.7%      | -1.8%        | -1.6% | -1.6%                       | -2.0% | -0.1%                      | -0.1% | -1.7%                                         | -1.7% | -0.1%                        | -0.2% | -0.4%                                 | -0.3% | -1.2%     | -0.9% | -0.3%                   | -0.2% | -2.3%                                         |
| Kiribati                              | -1.4%              | -1.7% | -1.8%              | -1.5% | -1.4%                        | -1.3% |         |        | 8.1%                                          | 7.6%   | -2.0%                       | -2.1% | -1.6%                     | -1.7% | 362.9%     | 376.9%     | -1.7%        | -1.9% | -0.4%                       | -2.1% | -0.1%                      | -0.0% | -0.9%                                         | -0.3% | 0.0%                         | -0.0% | -0.5%                                 | -0.5% | -1.7%     | -2.6% | -1.0%                   | -1.2% | -1.2%                                         |
| Kyrgyzstan                            | -1.8%              | -1.8% | -0.3%              | -0.5% | -2.6%                        | -2.5% | -3.3%   | -3.3%  | 2.0%                                          | 3.9%   | -0.9%                       | -1.0% | -2.2%                     | -2.1% | 7.2%       | 5.5%       | -2.0%        | -2.1% | -0.8%                       | -1.0% | 0.0%                       | -0.0% | -0.1%                                         | -1.2% | -0.4%                        | -0.3% | -0.8%                                 | -0.9% | -2.8%     | -2.7% | -1.6%                   | -1.5% | -0.4%                                         |
| Laos People's Democratic Republic     | -2.5%              | -2.5% | -2.6%              | -2.1% | -2.6%                        | -2.6% | -2.7%   | -2.7%  | 65.1%                                         | 76.1%  | -3.0%                       | -3.1% | -2.4%                     | -2.3% | 5.8e+14%   | 4.1e+14%   | -2.8%        | -2.6% | -1.9%                       | -2.2% | -0.1%                      | -0.1% | -1.1%                                         | -1.7% | -0.5%                        | -0.4% | -1.3%                                 | -1.5% | -3.0%     | -3.1% | -1.5%                   | -1.4% | -3.2%                                         |
| Lesotho                               | 0.8%               | 0.6%  | -0.9%              | -1.0% | -0.7%                        | 0.4%  |         |        | 8.7%                                          | 10.1%  | -3.0%                       | -3.0% | -1.2%                     | -0.5% | 639.2%     | 686.8%     | -1.0%        | -0.3% | -2.6%                       | -2.5% | -0.0%                      | 0.0%  | -1.3%                                         | -1.1% | -0.3%                        | -0.3% | -0.0%                                 | 0.2%  | -1.4%     | -2.1% | -0.9%                   | -0.7% | -2.3%                                         |
| Maldives                              | -2.4%              | -2.1% | -2.3%              | -2.0% | -2.6%                        | -2.1% |         |        | 16.6%                                         | 12.7%  | -3.2%                       | -3.2% | -2.2%                     | -2.0% | 23.9%      | 21.7%      | -3.1%        | -3.1% | -2.1%                       | -1.7% | -0.1%                      | -0.1% | -1.4%                                         | -1.8% | -0.2%                        | -0.3% | -2.2%                                 | -2.1% | -3.0%     | -1.8% | -2.8%                   | -2.3% | -3.1%                                         |
| Marshall Islands                      | -1.1%              | -1.0% | -1.5%              | -1.4% | -0.9%                        | -0.6% |         |        | 1.3%                                          | 1.8%   | -2.0%                       | -2.1% | -1.4%                     | -1.3% | 415.0%     | 450.1%     | -1.8%        | -1.7% | -1.0%                       | -1.2% | -0.0%                      | -0.0% | -0.0%                                         | 0.3%  | -0.1%                        | -0.1% | -1.3%                                 | -0.5% | -2.1%     | -2.1% | 0.2%                    | 0.0%  | -1.4%                                         |
| Mauritania                            | -1.8%              | -1.7% | -1.9%              | -1.5% | -1.6%                        | -1.9% | 13.2%   | 16.9%  | 36.7%                                         | 50.8%  | -3.1%                       | -3.1% | -1.9%                     | -2.1% | -0.8%      | -0.1%      | -2.3%        | -2.7% | -1.4%                       | -1.7% | -0.3%                      | -0.3% | -1.9%                                         | -1.8% | -0.1%                        | -0.2% | -0.8%                                 | -0.6% | -1.6%     | -2.3% | -1.2%                   | -0.9% | -2.8%                                         |
| Micronesia (Federated States of)      | -1.4%              | -1.6% | -1.9%              | -1.9% | -1.8%                        | -1.9% |         |        | 2.3%                                          | 3.8%   | -2.7%                       | -2.8% | -2.0%                     | -2.1% | 2,334.7%   | 2,731.1%   | -2.5%        | -2.4% | -1.8%                       | -2.4% | -0.1%                      | -0.1% | -1.1%                                         | -1.1% | -0.1%                        | -0.1% | -1.4%                                 | -1.0% | -2.3%     | -2.4% | -0.9%                   | -1.4% | -2.0%                                         |
| Mongolia                              | -2.3%              | -2.0% | 0.1%               | 0.1%  | -2.6%                        | -2.3% |         |        | 9.4%                                          | 10.2%  | -2.7%                       | -2.6% | -2.9%                     | -2.6% | 24,393.6%  | 24,499.7%  | -2.7%        | -2.4% | -1.8%                       | -1.7% | 0.1%                       | 0.0%  | 1.8%                                          | 1.7%  | -0.2%                        | -0.2% | -1.5%                                 | -1.8% | -3.0%     | -2.8% | -1.0%                   | -1.1% | -2.7%                                         |
| Morocco                               | -2.3%              | -2.0% | -1.2%              | -0.6% | -2.0%                        | -1.9% | -3.3%   | -3.3%  | 15.5%                                         | 23.8%  | -3.0%                       | -3.0% | -2.0%                     | -2.0% | 82.7%      | 79.4%      | -2.7%        | -2.8% | -1.6%                       | -1.6% | -0.0%                      | -0.1% | -1.1%                                         | -1.1% | -0.1%                        | -0.1% | -1.3%                                 | -1.1% | -2.2%     | -2.3% | -2.1%                   | -2.0% | -3.0%                                         |
| Myanmar                               | -2.6%              | -2.5% | -2.2%              | -2.2% | -2.9%                        | -3.0% | -3.2%   | -3.2%  | 43.3%                                         | 55.7%  | -3.1%                       | -3.1% | -2.8%                     | -2.3% | 30,946.9%  | 34,349.5%  | -2.8%        | -2.7% | -2.7%                       | -2.5% | -0.1%                      | -0.1% | -0.5%                                         | -1.1% | -0.5%                        | -0.5% | -1.4%                                 | -1.4% | -2.3%     | -2.7% | -1.9%                   | -2.0% | -2.5%                                         |
| Nicaragua                             | -1.6%              | -1.6% | -1.4%              | -1.6% | -2.1%                        | -1.9% | -3.1%   | -3.0%  | -1.3%                                         | -0.8%  | -3.2%                       | -3.2% | -2.4%                     | -2.4% | 81.5%      | 81.8%      | -3.0%        | -3.1% | -1.5%                       | -1.7% | -0.0%                      | -0.0% | -1.6%                                         | -1.3% | -0.1%                        | -0.1% | -1.9%                                 | -1.5% | -1.5%     | -1.4% | -1.6%                   | -1.2% | -3.0%                                         |
| Nigeria                               | -1.6%              | -1.6% | -1.1%              | -0.9% | -2.4%                        | -2.2% | -0.8%   | -1.0%  | 22.9%                                         | 35.3%  | -2.9%                       | -2.9% | -1.4%                     | -1.3% | 167.1%     | 179.7%     | -2.3%        | -2.2% | -1.8%                       | -2.2% | 0.1%                       | 0.2%  | -1.3%                                         | -0.6% | -0.1%                        | -0.1% | -0.2%                                 | -0.2% | -1.8%     | -2.2% | -1.2%                   | -1.1% | -1.7%                                         |
| Palestine                             | -2.0%              | -1.9% | -0.9%              | -0.8% | -1.8%                        | -1.8% |         |        | 3.5%                                          | 6.9%   | -3.3%                       | -3.3% | -2.3%                     | -2.2% | 125.5%     | 102.5%     | -2.7%        | -2.7% | -1.9%                       | -2.4% | -0.1%                      | -0.1% | -0.7%                                         | -0.9% | -0.1%                        | -0.2% | -1.0%                                 | -0.8% | -2.4%     | -1.6% | -1.1%                   | -1.0% | -3.1%                                         |
| Sao Tome and Principe                 | -2.2%              | -2.6% | -2.0%              | -2.7% | -1.7%                        | -2.6% | -2.9%   | -3.0%  | 14.2%                                         | 24.8%  | -3.2%                       | -3.2% | -1.5%                     | -2.4% | 6.0%       | 11.4%      | -2.5%        | -2.6% | -1.7%                       | -2.1% | -0.2%                      | -0.3% | -1.7%                                         | -1.6% | -0.1%                        | -0.4% | -0.8%                                 | -1.4% | -1.9%     | -3.0% | -1.0%                   | -1.7% | -2.8%                                         |
| Sudan                                 | -2.4%              | -2.4% | -0.3%              | 0.7%  | -1.5%                        | -1.3% | -1.2%   | -1.4%  | 34.8%                                         | 41.4%  | -3.2%                       | -3.2% | -2.2%                     | -2.2% | 186.6%     | 180.0%     | -2.6%        | -2.7% | -2.4%                       | -2.5% | -0.0%                      | -0.0% | 0.5%                                          | 0.1%  | -0.2%                        | -0.2% | -0.6%                                 | -0.5% | -1.9%     | -2.6% | -1.8%                   | -1.5% | -2.4%                                         |
| Tajikistan                            | -1.7%              | -1.6% | -0.4%              | -0.5% | -2.2%                        | -1.8% | -3.2%   | -3.2%  | 5.7%                                          | 8.0%   | -2.1%                       | -2.1% | -2.5%                     | -2.6% | 26.4%      | 52.4%      | -1.4%        | -1.0% | -0.9%                       | -1.0% | -0.0%                      | -0.0% | -1.3%                                         | -0.0% | -0.1%                        | -0.2% | -0.5%                                 | -0.5% | -2.5%     | -2.5% | -1.3%                   | -1.3% | -1.3%                                         |
| Timor-Leste                           | -2.4%              | -2.3% | -2.1%              | -1.5% | -2.2%                        | -1.8% | -3.3%   | -3.3%  | 39.2%                                         | 24.4%  | -3.1%                       | -3.1% | -1.8%                     | -1.5% | 4,003.8%   | 4,187.5%   | -2.5%        | -2.3% | -1.6%                       | -2.3% | -0.1%                      | -0.1% | -0.8%                                         | -1.1% | -0.4%                        | -0.3% | -0.8%                                 | -0.6% | -2.7%     | -2.5% | -0.7%                   | -0.2% | -2.8%                                         |
| Tuvalu                                | -2.0%              | -1.9% | -2.0%              | -1.6% | -2.5%                        | -2.4% |         |        | 13.5%                                         | 13.7%  | -2.6%                       | -2.7% | -2.5%                     | -2.5% | 486.7%     | 517.3%     | -2.9%        | -2.8% | -0.3%                       | -0.5% | -0.1%                      | -0.1% | -1.7%                                         | -1.6% | -0.1%                        | -0.2% | -1.2%                                 | -1.0% | -2.6%     | -2.8% | -1.9%                   | -2.1% | -2.7%                                         |
| Vanuatu                               | -1.3%              | -1.4% | -0.9%              | -1.2% | -0.4%                        | -0.5% | -3.3%   | -3.3%  | 2.0%                                          | 2.6%   | -2.2%                       | -2.3% | -0.8%                     | -1.1% | 466.7%     | 501.1%     | -1.3%        | -1.2% | 1.3%                        | -2.0% | -0.0%                      | -0.0% | 0.8%                                          | 0.8%  | -0.0%                        | -0.1% | 0.7%                                  | 0.7%  | -1.6%     | -2.5% | 0.8%                    | 0.2%  | -0.4%                                         |
| Venezuela (Bolivarian Republic of)    | -0.5%              | -0.6% | -0.5%              | -0.4% | -1.6%                        | -1.4% | 5.4%    | 4.2%   | 2.6%                                          | 3.0%   | -2.4%                       | -2.0% | -2.0%                     | -2.0% | 2.1%       | -0.4%      | -2.5%        | -2.7% | -1.4%                       | -1.3% | -0.1%                      | -0.1% | 0.1%                                          | -0.9% | -0.1%                        | -0.1% | -0.8%                                 | -0.4% | -2.1%     | -2.2% | -2.6%                   | -2.5% | -2.2%                                         |
| Zambia                                | -1.7%              | -1.7% | -1.9%              | -0.9% | -2.0%                        | -1.7% | -1.9%   | -1.8%  | 49.6%                                         | 68.7%  | -3.1%                       | -3.1% | -2.5%                     | -2.3% | 22.9%      | 25.6%      | -3.4%        | -2.7% | -2.7%                       | -2.9% | -0.1%                      | -0.2% | -1.3%                                         | -1.3% | -0.6%                        | -0.5% | -0.5%                                 | -0.5% | -1.8%     | -1.8% | -1.5%                   | -1.3% | -2.3%                                         |
| Zimbabwe                              | 0.9%               | 0.3%  | 1.6%               | 2.1%  | 0.4%                         | 1.0%  | -1.6%   | -1     |                                               |        |                             |       |                           |       |            |            |              |       |                             |       |                            |       |                                               |       |                              |       |                                       |       |           |       |                         |       |                                               |

|                                  |  | 5 to 14            |       |                    |       |                              |       |         |       |                                               |        |                             |       |                           |       |          |          |              |       |                             |       |                            |       |                                               |       |                              |       |                                       |       |           |       |                         |       |                                               |
|----------------------------------|--|--------------------|-------|--------------------|-------|------------------------------|-------|---------|-------|-----------------------------------------------|--------|-----------------------------|-------|---------------------------|-------|----------|----------|--------------|-------|-----------------------------|-------|----------------------------|-------|-----------------------------------------------|-------|------------------------------|-------|---------------------------------------|-------|-----------|-------|-------------------------|-------|-----------------------------------------------|
|                                  |  | Total communicable |       | Enteric infections |       | Lower respiratory infections |       | Malaria |       | Neonatal sepsis and other neonatal infections |        | Vaccine Preventable disease |       | Meningitis & Encephalitis |       | HIV/AIDS |          | Tuberculosis |       | Neglected Tropical diseases |       | Infectious skin conditions |       | Sexually transmitted infections excluding HIV |       | Upper respiratory infections |       | Other unspecified infectious diseases |       | Hepatitis |       | Rheumatic heart disease |       | Maternal sepsis and other maternal infections |
|                                  |  | Female             | Male  | Female             | Male  | Female                       | Male  | Female  | Male  | Female                                        | Male   | Female                      | Male  | Female                    | Male  | Female   | Male     | Female       | Male  | Female                      | Male  | Female                     | Male  | Female                                        | Male  | Female                       | Male  | Female                                | Male  | Female    | Male  | Female                  | Male  | Female                                        |
| Albania                          |  | -1.3%              | -1.6% | -0.6%              | -0.5% | -2.6%                        | -2.1% |         |       | 3.7%                                          | 7.5%   | -3.2%                       | -3.2% | -2.3%                     | -1.8% | 16.4%    | 17.4%    | -2.7%        | -2.9% | -1.8%                       | -2.3% | -0.0%                      | -0.1% | -0.7%                                         | -0.2% | -0.2%                        | -0.2% | -1.2%                                 | -1.1% | -0.9%     | -0.7% | 1.6%                    | -1.3% | -0.2%                                         |
| Algeria                          |  | -2.1%              | -2.0% | -1.0%              | -0.8% | -2.4%                        | -2.5% | -2.1%   | -2.1% | 14.6%                                         | 18.8%  | -3.2%                       | -3.2% | -2.3%                     | -2.4% | 11.1%    | 10.3%    | -2.9%        | -2.9% | -2.0%                       | -2.3% | 0.0%                       | 0.0%  | -1.1%                                         | -1.1% | -0.1%                        | -0.1% | -1.3%                                 | -1.4% | -2.3%     | -2.4% | -2.5%                   | -2.4% | -3.2%                                         |
| Armenia                          |  | -0.7%              | -0.6% | -0.0%              | -0.0% | -1.6%                        | -1.8% | -3.3%   | -3.3% | -0.6%                                         | -0.4%  | -1.9%                       | -2.3% | -1.6%                     | -1.4% | 48.6%    | 14.2%    | -1.9%        | -2.1% | -0.9%                       | -0.6% | 0.0%                       | 0.0%  | -0.3%                                         | -2.1% | -0.4%                        | -0.1% | -0.8%                                 | -0.4% | -1.7%     | -0.7% | -0.8%                   | -0.8% | -2.2%                                         |
| Azerbaijan                       |  | -1.3%              | -1.4% | 0.6%               | 0.1%  | -1.7%                        | -1.8% | -3.3%   | -3.3% | 5.3%                                          | 10.4%  | -2.4%                       | -2.4% | -1.1%                     | -1.2% | 15.9%    | 13.2%    | -2.1%        | -2.1% | -1.7%                       | -1.8% | -0.0%                      | -0.0% | -1.8%                                         | -1.5% | -0.1%                        | -0.2% | -1.4%                                 | -1.1% | -1.9%     | -2.0% | -0.9%                   | -1.1% | -2.7%                                         |
| Botswana                         |  | -1.3%              | -1.4% | -1.8%              | -2.3% | 0.2%                         | 0.0%  | -0.6%   | -0.8% | 8.2%                                          | 11.8%  | -3.0%                       | -3.1% | -0.7%                     | -0.7% | 99.6%    | 121.1%   | -1.5%        | -1.4% | -2.4%                       | -2.4% | -0.0%                      | -0.1% | -1.3%                                         | -1.4% | -0.2%                        | -0.3% | -0.7%                                 | -0.6% | -1.5%     | -1.9% | -0.9%                   | -1.0% | -2.5%                                         |
| Brazil                           |  | -1.1%              | -1.2% | -0.7%              | -0.7% | -1.9%                        | -1.9% | -3.2%   | -3.2% | 7.3%                                          | 12.4%  | -2.1%                       | -2.2% | -2.3%                     | -2.4% | 0.3%     | -0.8%    | -2.5%        | -2.7% | -0.6%                       | -0.8% | 0.0%                       | 0.0%  | -0.9%                                         | -1.4% | -0.2%                        | -0.1% | -1.0%                                 | -0.8% | -1.4%     | -1.6% | -1.6%                   | -1.7% | -1.5%                                         |
| China                            |  | -1.8%              | -1.8% | -1.4%              | -1.7% | -2.8%                        | -2.8% | -3.3%   | -3.3% | 23.2%                                         | 20.0%  | -3.2%                       | -3.2% | -2.6%                     | -2.5% | 58.7%    | 51.6%    | -3.0%        | -3.0% | -2.6%                       | -2.6% | -0.1%                      | -0.1% | -1.3%                                         | -1.3% | -0.6%                        | -0.7% | -2.4%                                 | -2.5% | -2.5%     | -2.5% | -2.3%                   | -2.2% | -3.3%                                         |
| Colombia                         |  | -1.2%              | -1.3% | -1.3%              | -1.4% | -2.1%                        | -2.2% | -3.3%   | -3.3% | 4.1%                                          | 8.9%   | -2.4%                       | -2.6% | -1.9%                     | -2.0% | 7.4%     | 1.9%     | -2.6%        | -2.8% | 1.0%                        | 0.1%  | -0.0%                      | -0.1% | -0.6%                                         | -1.3% | -0.2%                        | -0.2% | -1.5%                                 | -1.3% | -1.2%     | -1.2% | -2.8%                   | -2.9% | -2.3%                                         |
| Costa Rica                       |  | -0.9%              | -0.8% | -0.5%              | -0.4% | -1.9%                        | -1.1% | -3.3%   | -3.3% | -1.6%                                         | -2.2%  | -2.0%                       | -1.7% | -2.0%                     | -2.0% | -0.3%    | 0.1%     | -2.6%        | -2.7% | -1.2%                       | -1.0% | -0.0%                      | -0.0% | -0.3%                                         | -0.8% | -0.1%                        | -0.1% | -0.8%                                 | -0.3% | -2.0%     | -1.7% | -0.9%                   | -0.8% | -2.3%                                         |
| Cuba                             |  | -1.0%              | -0.8% | 0.9%               | 1.6%  | -1.3%                        | -1.3% |         |       | -0.4%                                         | -0.7%  | -1.0%                       | -0.9% | -2.8%                     | -2.7% | 4.3%     | 9.7%     | -2.3%        | -2.3% | -1.0%                       | -0.9% | -0.0%                      | -0.0% | -0.1%                                         | -0.8% | -0.1%                        | -0.0% | -0.8%                                 | -0.5% | -2.1%     | -2.1% | -1.2%                   | -1.2% | -1.3%                                         |
| Ecuador                          |  | -2.0%              | -2.0% | -1.5%              | -1.9% | -1.9%                        | -1.8% | -3.3%   | -3.3% | -0.5%                                         | -0.4%  | -2.4%                       | -2.5% | -1.9%                     | -2.0% | 11.4%    | 11.3%    | -3.0%        | -3.0% | -2.5%                       | -2.5% | -0.0%                      | -0.0% | -1.0%                                         | -1.5% | -0.1%                        | -0.2% | -2.0%                                 | -2.1% | -2.0%     | -2.1% | -1.3%                   | -1.2% | -2.6%                                         |
| Egypt                            |  | -2.5%              | -2.3% | -1.4%              | -1.7% | -2.7%                        | -2.5% | -3.3%   | -3.3% | 11.6%                                         | 12.1%  | -3.2%                       | -3.2% | -2.2%                     | -2.1% | 11.7%    | 16.3%    | -2.9%        | -2.9% | -2.9%                       | -2.8% | -0.2%                      | -0.2% | -0.9%                                         | -0.8% | -0.4%                        | -0.4% | -1.7%                                 | -1.3% | -2.9%     | -2.6% | -3.8%                   | -2.6% | -2.3%                                         |
| Equatorial Guinea                |  | -2.0%              | -2.1% | -3.0%              | -2.9% | -2.6%                        | -2.6% | 0.0%    | -0.8% | 88.7%                                         | 114.7% | -3.1%                       | -3.2% | -2.7%                     | -2.8% | 516.5%   | 570.7%   | -3.1%        | -3.2% | -2.9%                       | -3.0% | -0.4%                      | -0.5% | -1.5%                                         | -2.1% | -0.8%                        | -1.0% | -1.5%                                 | -1.7% | -2.3%     | -2.6% | -1.5%                   | -2.0% | -3.2%                                         |
| Fiji                             |  | -1.1%              | -1.1% | -1.4%              | -1.2% | -0.8%                        | -0.4% |         |       | 0.2%                                          | 1.8%   | -2.6%                       | -2.7% | -1.8%                     | -1.3% | 166.9%   | 166.6%   | -1.7%        | -1.1% | -0.3%                       | -1.9% | -0.0%                      | -0.0% | -0.7%                                         | 0.1%  | -0.1%                        | -0.1% | 0.1%                                  | 0.5%  | -1.7%     | -1.8% | -0.8%                   | -0.3% | -0.9%                                         |
| Gabon                            |  | -1.7%              | -1.8% | -2.3%              | -2.2% | -2.2%                        | -1.8% | -1.0%   | -1.5% | 20.6%                                         | 23.4%  | -2.7%                       | -2.7% | -2.3%                     | -2.1% | 153.0%   | 184.4%   | -2.4%        | -2.3% | -2.6%                       | -2.6% | -0.2%                      | -0.2% | -1.8%                                         | -1.8% | -0.3%                        | -0.3% | -0.5%                                 | -0.5% | -1.7%     | -2.0% | -0.7%                   | -1.1% | -2.7%                                         |
| Grenada                          |  | -1.0%              | -0.4% | 0.6%               | 1.0%  | -1.7%                        | -1.8% |         |       | 4.0%                                          | 5.1%   | -2.0%                       | -2.6% | -2.7%                     | -2.5% | -1.8%    | -1.4%    | -2.3%        | -2.1% | -1.8%                       | -1.3% | -0.0%                      | 0.2%  | -0.2%                                         | -0.3% | -0.4%                        | -0.6% | -2.4%                                 | -2.1% | -1.9%     | -1.0% | -1.9%                   | -1.0% | -1.9%                                         |
| Guyana                           |  | -1.5%              | -1.5% | -1.4%              | -1.8% | -1.0%                        | -0.8% | -2.8%   | -2.9% | 2.2%                                          | 7.3%   | -2.8%                       | -2.8% | -1.8%                     | -2.0% | 0.2%     | -1.3%    | -2.5%        | -2.5% | -0.9%                       | -1.5% | 0.1%                       | 0.1%  | 0.2%                                          | -2.1% | -0.1%                        | -0.2% | -0.7%                                 | -0.3% | -2.4%     | -2.3% | -1.7%                   | -1.7% | -2.1%                                         |
| Indonesia                        |  | -2.3%              | -2.2% | -2.4%              | -2.3% | -2.5%                        | -2.5% | -2.8%   | -2.9% | 13.6%                                         | 10.8%  | -3.0%                       | -3.0% | -2.2%                     | -2.3% | 8.1e+14% | 6.2e+14% | -2.8%        | -2.7% | -2.0%                       | -1.8% | -0.0%                      | -0.1% | -0.4%                                         | -1.6% | 0.0%                         | -0.1% | -1.5%                                 | -2.1% | -3.0%     | -2.4% | -2.3%                   | -2.1% | -2.9%                                         |
| Iran (Islamic Republic of)       |  | -1.6%              | -1.5% | -0.2%              | -0.2% | -2.0%                        | -2.0% | -3.3%   | -3.3% | 7.3%                                          | 19.3%  | -3.2%                       | -3.2% | -1.9%                     | -2.0% | 73.2%    | 74.3%    | -2.7%        | -2.9% | -2.3%                       | -2.4% | -0.0%                      | -0.0% | 0.4%                                          | 0.3%  | -0.1%                        | -0.1% | -1.1%                                 | -1.0% | -2.3%     | -1.9% | -2.2%                   | -2.1% | -3.0%                                         |
| Iraq                             |  | -2.2%              | -2.2% | -1.2%              | -1.1% | -2.5%                        | -2.6% | -3.3%   | -3.3% | 5.1%                                          | 13.7%  | -3.0%                       | -3.0% | -2.1%                     | -2.3% | 48.2%    | 86.6%    | -2.9%        | -3.0% | -2.0%                       | -2.4% | -0.1%                      | -0.1% | -1.2%                                         | -1.1% | -0.2%                        | -0.2% | -1.4%                                 | -1.6% | -2.6%     | -2.5% | -2.4%                   | -2.3% | -2.2%                                         |
| Jamaica                          |  | -0.6%              | -0.8% | -0.8%              | -1.3% | -2.3%                        | -2.0% |         |       | 3.6%                                          | 8.7%   | -2.2%                       | -2.9% | -2.0%                     | -2.2% | 2.0%     | -0.6%    | -1.9%        | -2.5% | -0.1%                       | 0.1%  | -0.5%                      | -0.3% | -0.1%                                         | -0.1% | -0.5%                        | -0.3% | -1.4%                                 | -1.4% | -2.3%     | -2.1% | -2.4%                   | -2.1% | -2.4%                                         |
| Mexico                           |  | -1.6%              | -1.6% | -2.3%              | -2.3% | -2.5%                        | -2.5% | -3.3%   | -3.3% | 2.4%                                          | 2.5%   | -2.6%                       | -2.7% | -1.9%                     | -1.9% | 1.5%     | -0.5%    | -3.0%        | -3.0% | -1.9%                       | -1.9% | 0.2%                       | 0.1%  | -0.9%                                         | -2.3% | -0.4%                        | -0.4% | -1.5%                                 | -1.4% | -0.7%     | -0.7% | -1.9%                   | -1.9% | -2.2%                                         |
| Namibia                          |  | -1.1%              | -1.0% | -1.8%              | -1.7% | -1.3%                        | -0.7% | -2.5%   | -2.6% | 13.0%                                         | 14.8%  | -3.2%                       | -3.2% | -1.6%                     | -1.2% | 458.9%   | 586.6%   | -2.1%        | -1.8% | -1.2%                       | -1.3% | -0.1%                      | -0.1% | -0.8%                                         | -0.4% | -0.3%                        | -0.3% | -0.7%                                 | -0.7% | -1.3%     | -1.3% | -1.3%                   | -1.2% | -2.5%                                         |
| Nauru                            |  | -0.9%              | -0.9% | -1.2%              | -1.2% | -0.9%                        | -0.8% |         |       | 2.8%                                          | 2.7%   | -3.0%                       | -3.0% | -1.3%                     | -1.4% | 575.5%   | 623.9%   | -1.7%        | -1.6% | 2.7%                        | 2.7%  | -0.0%                      | -0.1% | -0.2%                                         | -0.2% | 0.0%                         | 0.0%  | -0.8%                                 | -0.5% | -1.6%     | -1.8% | 0.4%                    | -0.1% | -1.1%                                         |
| Panama                           |  | -0.9%              | -0.9% | -0.9%              | -0.9% | -0.7%                        | -0.4% | -2.0%   | -1.8% | 1.6%                                          | 1.2%   | -2.6%                       | -2.7% | -1.9%                     | -2.1% | 1.5%     | 1.0%     | -2.2%        | -2.0% | -2.4%                       | -2.4% | -0.0%                      | -0.0% | 1.2%                                          | 0.4%  | -0.1%                        | -0.1% | -0.2%                                 | -0.0% | -2.1%     | -1.7% | -1.8%                   | -1.1% | -1.7%                                         |
| Paraguay                         |  | -1.2%              | -1.2% | -1.0%              | -1.3% | -2.1%                        | -2.2% | -3.3%   | -3.3% | -2.6%                                         | -1.8%  | -2.7%                       | -2.8% | -2.2%                     | -2.2% | 111.6%   | 107.9%   | -2.6%        | -2.5% | -1.5%                       | -1.7% | -0.0%                      | -0.0% | -0.2%                                         | -0.3% | -0.1%                        | -0.1% | -0.7%                                 | -0.6% | -1.8%     | -1.6% | -1.0%                   | -1.0% | -2.9%                                         |
| Peru                             |  | -1.7%              | -1.5% | -1.4%              | -1.0% | -2.3%                        | -2.2% | -3.2%   | -3.1% | 12.5%                                         | 16.3%  | -2.4%                       | -2.5% | -1.9%                     | -1.7% | 55.0%    | 51.4%    | -3.1%        | -3.1% | -2.2%                       | -2.0% | -0.1%                      | -0.1% | -1.7%                                         | -2.1% | -0.1%                        | -0.2% | -1.6%                                 | -1.0% | -2.4%     | -2.4% | -1.0%                   | -1.0% | -3.1%                                         |
| Philippines                      |  | -1.5%              | -1.6% | -1.0%              | -1.3% | -2.0%                        | -2.0% | -3.2%   | -3.2% | 9.2%                                          | 7.8%   | -2.7%                       | -2.7% | -1.9%                     | -1.9% | 12.7%    | 9.9%     | -2.1%        | -2.2% | -1.2%                       | -1.7% | -0.0%                      | -0.1% | 0.8%                                          | -0.0% | -0.3%                        | -0.2% | -1.0%                                 | -0.2% | -2.7%     | -2.7% | 2.4%                    | 2.2%  | -2.6%                                         |
| Saint Lucia                      |  | -0.1%              | -0.6% | 1.1%               | 0.9%  | -0.2%                        | -0.8% |         |       | 4.6%                                          | 5.9%   | -2.0%                       | -1.4% | -1.5%                     | -2.1% | -0.9%    | -1.7%    | -2.2%        | -2.4% | -1.2%                       | -1.5% | 0.0%                       | -0.0% | 1.3%                                          | -1.6% | -0.1%                        | -0.2% | -0.9%                                 | -0.6% | -1.2%     | -1.6% | -0.7%                   | -1.0% | -1.6%                                         |
| Saint Vincent and the Grenadines |  | -0.6%              | -0.8% | -0.3%              | -0.3% | -1.2%                        | -1.6% |         |       | 1.8%                                          | 5.1%   | -1.4%                       | -1.6% | -2.4%                     | -2.6% | 1.6%     | -0.7%    | -2.4%        | -2.4% | -1.1%                       | -1.1% | 0.1%                       | 0.1%  | -0.0%                                         | -2.5% | -0.1%                        | -0.3% | -0.8%                                 | -0.5% | -1.9%     | -1.4% | -1.4%                   | -1.3% | -0.9%                                         |
| Samoa                            |  | -1.1%              | -1.1% | -1.4%              | -1.2% | -2.0%                        | -2.0% |         |       | 1.5%                                          | 1.6%   | -0.7%                       | -0.6% | -2.0%                     | -2.0% | 497.5%   | 548.9%   | -2.4%        | -2.3% | 0.3%                        | 0.6%  | -0.1%                      | -0.0% | -0.8%                                         | -0.2% | -0.1%                        | -0.1% | -0.8%                                 | -0.7% | -1.6%     | -2.3% | -1.1%                   | -1.3% | -2.7%                                         |
| South Africa                     |  | 0.2%               | 0.5%  | -1.9%              | -2.0% | -2.0%                        | -2.0% | -2.1%   | -2.1% | 15.7%                                         | 16.2%  | -2.6%                       | -2.6% | -2.1%                     | -2.2% | 2,215.5% | 2,694.5% | -1.7%        | -1.8% | -2.3%                       | -2.3% | -0.0%                      | -0.1% | -1.6%                                         | -1.5% | -0.4%                        | -0.3% | 0.3%                                  | 0.3%  | -1.6%     | -2.4% | -1.7%                   | -1.7% | -3.1%                                         |
| Suriname                         |  | -1.4%              | -1.2% | -0.4%              | -0.6% | -1.4%                        | -1.2% | -3.3%   | -3.3% | 5.7%                                          | 8.4%   | -2.8%                       | -2.7% | -2.1%                     | -2.1% | -1.7%    | -2.0%    | -2.6%        | -2.3% | 0.4%                        | -0.2% | 0.0%                       | 0.0%  | -1.0%                                         | -1.2% | -0.1%                        | -0.1% | -0.6%                                 | -0.1% | -2.2%     | -2.2% | -1.5%                   | -1.1% | -1.1%                                         |
| Syrian Arab Republic             |  | -1.6%              | -1.7% | -0.7%              | -0.9% | -0.7%                        | -0.9% | -3.3%   | -3.3% | 1.6%                                          | 2.9%   | -3.1%                       | -3.1% | -2.1%                     | -2.1% | 4.8%     | 5.5%     | -2.6%        | -2.7% | 2.3%                        | 2.1%  | -0.2%                      | -0.2% | -0.5%                                         | -0.2% | -0.2%                        | -0.2% | -1.4%                                 | -1.5% | -2.3%     | -2.2% | -2.6%                   | -2.6% | -2.9%                                         |
| Thailand                         |  | -1.8%              | -1.9% | -1.9%              | -1.8% | -1.8%                        | -2.0% | -3.3%   | -3.3% | 13.5%                                         | 7.0%   | -3.0%                       | -3.0% | -2.3%                     | -2.5% | 4.7e+14% | 3.1e+14% | -2.9%        | -3.0% | -2.4%                       | -2.6% | -0.1%                      | -0.2% | -0.7%                                         | -1.4% | -0.2%                        | -0.2% | -1.5%                                 | -1.5% | -2.3%     | -2.4% | -1.8%                   | -1.8% | -1.5%                                         |
| Tokelau                          |  | -1.4%              | -1.4% | -1.5%              | -1.2% | -2.0%                        | -2.1% |         |       | 2.1%                                          | 2.9%   | -2.3%                       | -2.4% | -2.0%                     | -2.1% | 533.5%   | 539.8%   | -2.6%        | -2.8% | 0.3%                        | 0.0%  | -0.0%                      | -0.0% | -1.1%                                         | -0.9% | -0.1%                        | -0.2% | -1.3%                                 | -1.0% | -2.0%     | -2.1% | -1.5%                   | -1.8% | -2.5%                                         |
| Tonga                            |  | -0.9%              | -1.1% | -0.2%              | -0.2% | -1.0%                        | -1.0% |         |       | 1.6%                                          | 1.6%   | -1.6%                       | -1.8% | -1.4%                     | -1.3% | 215.7%   | 236.9%   | -1.8%        | -1.6% | -1.1%                       | -1.9% | -0.0%                      | -0.0% | -0.3%                                         | -0.2% | -0.1%                        | -0.1% | -0.6%                                 | -0.4% | -2.2%     | -2.3% | -0.6%                   | -0.7% | -1.7%                                         |
| Tunisia                          |  | -1.7%              | -1.5% | -1.2%              | -0.9% | -2.4%                        | -2.2% |         |       | 5.2%                                          | 6.1%   | -2.9%                       | -2.8% | -2.2%                     | -2.1% | 69.2%    | 76.2%    | -2.9%        | -2.9% | -1.9%                       | -2.1% | -0.0%                      | -0.0% | -1.0%                                         | -0.9% | -0.1%                        | -0.1% | -1.2%                                 | -1.1% | -2.2%     | -2.2% | -2.9%                   | -2.7% | -3.0%                                         |
| Turkmenistan                     |  | -1.4%              | -1.4% | -1.0%              | -1.3% | -1.7%                        | -1.7% | -3.3%   | -3.3% | 11.6%                                         | 16.8%  | -2.4%                       | -2.2% | -1.2%                     | -1.1% | -1.1%    | -0.6%    | -2.0%        | -1.9% | -1.7%                       | -1.8% | 0.0%                       | 0.0%  | -1.4%                                         | -1.7% | -0.2%                        | -0.3% | -0.8%                                 | -0.7% | -2.7%     | -2.2% | -1.2%                   | -1.5% | -1.0%                                         |
| Uzbekistan                       |  | -0.7%              | -0.7% | -0.5%              | -0.6% | -0.1%                        | -0.0% | -3.3%   | -3.3% | 14.4%                                         | 18.1%  | -2.2%                       | -2.4% | -1.7%                     | -1.7% | -0.7%    | 3.3%     | -1.0%        | -1.2% | -0.9%                       | -0.8% | -0.0%                      | -0.0% | -1.9%                                         | -2.3% | -0.3%                        | -0.5% | -0.6%                                 | -0.5% | -2.8%     | -2.8% | -1.3%                   | -1.3% | -2.2%                                         |
| Viet Nam                         |  | -2.0%              | -2.0% | -1.7%              | -1.8% | -1.7%                        | -1.8% | -3.1%   | -3.0% | 3.5%                                          | 5.5%   | -3.1%                       | -3.1% | -1.0%                     | -0.9% | 9.1e+13% | 8.4e+13% | -2.3%        | -2.6% | -1.3%                       | -2.8% | -0.0%                      | -0.0% | -0.1%                                         | -0.7% | -0.3%                        | -0.3% | -2.4%                                 | -2.4% | -2.4%     | -2.1% | -2.1%                   | -2.1% | -2.8%                                         |

|                          |  | 5 to 14            |       |                    |       |                              |       |         |       |                                               |       |                             |       |                           |       |          |          |              |       |                             |       |                            |       |                                               |       |                              |       |                                       |       |           |       |                         |       |                                               |
|--------------------------|--|--------------------|-------|--------------------|-------|------------------------------|-------|---------|-------|-----------------------------------------------|-------|-----------------------------|-------|---------------------------|-------|----------|----------|--------------|-------|-----------------------------|-------|----------------------------|-------|-----------------------------------------------|-------|------------------------------|-------|---------------------------------------|-------|-----------|-------|-------------------------|-------|-----------------------------------------------|
|                          |  | Total communicable |       | Enteric infections |       | Lower respiratory infections |       | Malaria |       | Neonatal sepsis and other neonatal infections |       | Vaccine Preventable disease |       | Meningitis & Encephalitis |       | HIV/AIDS |          | Tuberculosis |       | Neglected Tropical diseases |       | Infectious skin conditions |       | Sexually transmitted infections excluding HIV |       | Upper respiratory infections |       | Other unspecified infectious diseases |       | Hepatitis |       | Rheumatic heart disease |       | Maternal sepsis and other maternal infections |
|                          |  | Female             | Male  | Female             | Male  | Female                       | Male  | Female  | Male  | Female                                        | Male  | Female                      | Male  | Female                    | Male  | Female   | Male     | Female       | Male  | Female                      | Male  | Female                     | Male  | Female                                        | Male  | Female                       | Male  | Female                                | Male  | Female    | Male  | Female                  | Male  | Female                                        |
| American Samoa           |  | -0.7%              | -0.8% | -1.0%              | -0.6% | -1.3%                        | -1.4% |         |       | 0.0%                                          | -2.0% | 1.5%                        | -1.5% | -0.6%                     | -1.4% | 533.2%   | 526.3%   | -1.9%        | -2.3% | 0.4%                        | 1.1%  | -0.1%                      | -0.1% | -1.6%                                         | -1.5% | -0.0%                        | -0.0% | -0.7%                                 | -0.1% | -0.7%     | -0.3% | -0.5%                   | -1.0% | -1.2%                                         |
| Antigua and Barbuda      |  | -0.5%              | -0.2% | 0.8%               | 1.3%  | -1.0%                        | 0.9%  |         |       | 1.3%                                          | 0.3%  | -0.9%                       | -1.8% | -2.1%                     | -1.7% | -0.5%    | -1.0%    | -2.0%        | -2.0% | -0.7%                       | -0.2% | -0.0%                      | 0.1%  | -0.1%                                         | -1.0% | -0.1%                        | -0.1% | -1.0%                                 | -0.4% | -1.8%     | -1.6% | -1.0%                   | -0.4% | -1.3%                                         |
| Argentina                |  | -0.6%              | -0.8% | 0.0%               | 0.3%  | 0.0%                         | -0.3% | -3.3%   | -3.3% | -2.2%                                         | -2.6% | -1.4%                       | -2.0% | -1.4%                     | -1.5% | 4.4%     | 1.0%     | -2.6%        | -2.7% | -2.4%                       | -2.4% | 0.0%                       | 0.0%  | -0.3%                                         | -1.7% | -0.0%                        | -0.0% | -1.0%                                 | -0.8% | -1.7%     | -1.6% | -0.7%                   | -0.9% | -2.1%                                         |
| Bahamas                  |  | -0.0%              | -0.6% | 1.3%               | 1.0%  | -0.9%                        | -1.4% |         |       | 1.3%                                          | -0.4% | -1.2%                       | -0.8% | -1.6%                     | -2.1% | 2.1%     | -0.3%    | -2.1%        | -2.3% | -2.5%                       | -0.5% | -0.0%                      | -0.0% | 0.8%                                          | -0.5% | -0.1%                        | -0.1% | -0.6%                                 | -0.3% | -1.6%     | -1.5% | -0.7%                   | -0.7% | -1.6%                                         |
| Bahrain                  |  | -0.8%              | -1.0% | -0.4%              | -0.3% | -0.6%                        | -1.4% |         |       | 3.9%                                          | 2.3%  | 3.0%                        | -3.0% | -1.6%                     | -2.0% | 23.8%    | 14.4%    | -2.4%        | -2.6% | -1.8%                       | -1.8% | -0.3%                      | -0.4% | -0.2%                                         | -0.2% | -0.1%                        | -0.1% | -1.6%                                 | -1.4% | -0.8%     | -1.1% | -2.0%                   | -2.7% | -3.0%                                         |
| Barbados                 |  | -0.3%              | -0.3% | 1.2%               | 1.4%  | -1.4%                        | -1.2% |         |       | 3.2%                                          | 3.4%  | -2.3%                       | -2.0% | -2.2%                     | -2.3% | 1.4%     | -2.0%    | -2.2%        | -2.2% | -0.3%                       | 0.1%  | 0.0%                       | -0.1% | 0.1%                                          | -1.4% | -0.1%                        | -0.0% | -1.1%                                 | -0.6% | -2.0%     | -1.7% | -1.3%                   | -0.9% | -1.9%                                         |
| Belarus                  |  | -0.8%              | -0.6% | -0.1%              | -0.2% | -2.5%                        | -2.1% |         |       | -1.0%                                         | -0.4% | -1.5%                       | -1.2% | -1.1%                     | -1.2% | 2.8%     | 2.5%     | -2.3%        | -2.4% | -1.4%                       | -1.5% | 0.0%                       | 0.0%  | -0.6%                                         | -2.1% | -0.2%                        | -0.2% | -0.0%                                 | -0.2% | -1.2%     | -0.7% | -2.1%                   | -2.7% | -2.4%                                         |
| Bosnia and Herzegovina   |  | -1.0%              | -1.0% | -1.0%              | -0.8% | -2.2%                        | -2.3% |         |       | -0.2%                                         | -0.4% | -1.5%                       | -1.4% | -2.0%                     | -2.0% | 5.6%     | 7.1%     | -2.8%        | -2.6% | -1.5%                       | -1.8% | -0.0%                      | -0.0% | -0.6%                                         | -0.5% | -0.2%                        | -0.2% | -1.1%                                 | -1.1% | -1.4%     | -1.2% | -2.4%                   | -2.6% | -3.1%                                         |
| Bulgaria                 |  | -1.3%              | -1.3% | -0.6%              | -0.6% | -2.5%                        | -2.4% |         |       | 11.7%                                         | 21.1% | 1.0%                        | -0.8% | -1.1%                     | -1.3% | 1.6%     | 0.8%     | -1.6%        | -1.7% | -1.7%                       | -2.1% | 0.1%                       | 0.0%  | -0.4%                                         | -0.6% | -0.1%                        | -0.1% | -0.8%                                 | -0.8% | -0.7%     | -0.9% | -2.6%                   | -2.9% | -1.8%                                         |
| Chile                    |  | -0.9%              | -1.2% | -0.3%              | -0.6% | -2.7%                        | -2.8% |         |       | -0.3%                                         | 0.3%  | -0.7%                       | -1.0% | -2.0%                     | -2.2% | 5.9%     | 3.5%     | -2.5%        | -2.9% | -2.4%                       | -2.4% | -0.0%                      | -0.0% | -0.1%                                         | -2.1% | -0.2%                        | -0.2% | -0.4%                                 | -0.4% | -2.0%     | -1.6% | -2.6%                   | -2.8% | -2.9%                                         |
| Cook Islands             |  | -1.4%              | -1.5% | -1.1%              | -0.8% | -2.7%                        | -2.7% |         |       | 0.4%                                          | 1.2%  | -2.4%                       | -2.4% | -1.9%                     | -1.8% | 618.3%   | 677.6%   | -2.7%        | -2.5% | -1.9%                       | -2.2% | -0.0%                      | -0.0% | -0.8%                                         | -0.5% | -0.1%                        | -0.2% | -1.2%                                 | -0.9% | -0.9%     | -1.4% | -2.4%                   | -2.6% | -1.0%                                         |
| Croatia                  |  | -0.5%              | -0.5% | -0.6%              | -0.6% | -2.4%                        | -2.4% |         |       | 1.7%                                          | 2.3%  | -0.9%                       | -0.7% | -1.8%                     | -1.8% | 5.8%     | 40.5%    | -2.5%        | -2.7% | -1.6%                       | -1.5% | -0.0%                      | -0.0% | -0.3%                                         | -0.6% | -0.1%                        | -0.0% | -1.1%                                 | -1.1% | -0.5%     | -0.6% | -3.8%                   | -2.5% | -2.3%                                         |
| Dominica                 |  | 0.0%               | 0.0%  | 0.7%               | 0.8%  | 0.3%                         | 0.5%  |         |       | 2.5%                                          | 2.2%  | 0.8%                        | 0.7%  | -1.4%                     | -1.3% | 0.1%     | 0.9%     | -1.8%        | -1.4% | -0.5%                       | -0.9% | 0.0%                       | 0.0%  | -0.4%                                         | -0.4% | -0.2%                        | -0.1% | -0.3%                                 | 0.4%  | -2.1%     | -1.6% | -0.6%                   | -0.4% | 0.5%                                          |
| Georgia                  |  | -1.6%              | -1.7% | 0.7%               | 0.7%  | -2.8%                        | -2.9% | -3.3%   | -3.3% | 0.9%                                          | 1.7%  | 2.0%                        | 0.8%  | -1.7%                     | -1.7% | 45.5%    | 35.8%    | -2.1%        | -2.4% | -0.3%                       | -0.2% | 0.1%                       | 0.0%  | -0.3%                                         | -0.8% | 0.1%                         | -0.0% | -0.2%                                 | 0.0%  | -1.5%     | -0.7% | -0.9%                   | -1.1% | -0.7%                                         |
| Greece                   |  | -0.3%              | -0.4% | -0.4%              | -0.4% | -1.0%                        | -1.2% |         |       | -1.3%                                         | -1.6% | -1.5%                       | -1.1% | -1.5%                     | -1.2% | 0.4%     | -2.1%    | -2.2%        | -2.6% | -1.2%                       | -1.1% | -0.0%                      | -0.0% | -0.2%                                         | -1.1% | -0.1%                        | -0.0% | -0.3%                                 | -0.2% | -0.4%     | -0.5% | -1.4%                   | -1.5% | -1.1%                                         |
| Greenland                |  | -1.0%              | -1.0% | -0.2%              | 0.0%  | -2.3%                        | -2.3% |         |       | 2.6%                                          | 3.2%  | -2.4%                       | -2.4% | -2.7%                     | -1.9% | 4.5%     | 2.8%     | -2.6%        | -2.9% | -2.4%                       | -2.4% | -0.0%                      | -0.0% | -0.5%                                         | -0.2% | -0.1%                        | -0.1% | -1.2%                                 | -1.2% | -1.3%     | -0.5% | -2.2%                   | -1.9% | -1.3%                                         |
| Hungary                  |  | -0.8%              | -0.7% | -0.6%              | -0.5% | -1.8%                        | -2.1% |         |       | -2.3%                                         | 2.0%  | -2.3%                       | -2.0% | -2.3%                     | -2.4% | -2.7%    | -2.7%    | -2.2%        | -2.3% | -1.3%                       | -1.3% | 0.1%                       | 0.1%  | -0.7%                                         | -1.0% | -0.1%                        | -0.1% | -0.9%                                 | -1.0% | -0.7%     | -0.8% | -2.6%                   | -2.9% | -1.3%                                         |
| Israel                   |  | -0.5%              | -0.5% | -0.2%              | -0.1% | -2.0%                        | -1.6% |         |       | -1.1%                                         | -0.2% | -0.9%                       | 0.0%  | -2.2%                     | -1.8% | -2.0%    | -1.7%    | -2.7%        | -2.8% | -1.7%                       | -1.3% | 0.0%                       | -0.0% | -0.5%                                         | -1.2% | 0.0%                         | 0.0%  | -0.7%                                 | -0.5% | -2.1%     | -1.8% | -2.4%                   | -2.0% | -3.2%                                         |
| Italy                    |  | -0.3%              | -0.4% | 0.0%               | 0.3%  | -2.3%                        | -2.4% |         |       | 0.0%                                          | 1.2%  | -2.2%                       | -1.6% | -1.8%                     | -1.7% | -2.0%    | -2.4%    | -2.6%        | -2.6% | -1.5%                       | -0.8% | 0.1%                       | 0.0%  | -0.5%                                         | -2.5% | -0.0%                        | -0.0% | -0.3%                                 | -0.0% | 0.1%      | -0.4% | -2.0%                   | -2.0% | -2.7%                                         |
| Jordan                   |  | -1.6%              | -1.4% | -0.7%              | -0.6% | -1.9%                        | -1.5% |         |       | 3.6%                                          | 5.0%  | -2.9%                       | -2.9% | -2.1%                     | -1.8% | 29.0%    | 29.3%    | -2.8%        | -2.7% | -2.0%                       | -2.2% | -0.1%                      | -0.1% | -0.8%                                         | -0.7% | -0.1%                        | -0.1% | -1.6%                                 | -1.5% | -2.0%     | -2.2% | -2.5%                   | -2.3% | -2.6%                                         |
| Kazakhstan               |  | -1.3%              | -1.5% | -0.7%              | -0.1% | -2.2%                        | -2.4% |         |       | 1.2%                                          | 2.1%  | -1.7%                       | -2.1% | -1.7%                     | -1.9% | 7.5%     | 1.1%     | -2.4%        | -2.7% | -1.2%                       | -1.0% | 0.0%                       | 0.0%  | 0.4%                                          | -1.8% | -0.2%                        | -0.1% | -0.4%                                 | -0.0% | -2.5%     | -2.4% | -2.6%                   | -2.2% | -0.0%                                         |
| Lebanon                  |  | -1.7%              | -1.6% | -0.4%              | -0.4% | -1.8%                        | -1.9% |         |       | -5.5%                                         | 4.7%  | -2.9%                       | -3.0% | -1.8%                     | -1.8% | 6.1%     | 6.0%     | -2.7%        | -2.7% | -2.4%                       | -2.6% | -0.0%                      | -0.0% | -0.2%                                         | -0.4% | -0.1%                        | -0.1% | -1.3%                                 | -1.4% | -2.2%     | -1.9% | -2.8%                   | -2.6% | -3.8%                                         |
| Libya                    |  | -1.5%              | -1.5% | 0.0%               | -0.2% | -1.8%                        | -2.0% |         |       | 1.0%                                          | 2.2%  | -3.1%                       | -3.1% | -1.7%                     | -2.0% | 19.3%    | 20.2%    | -2.6%        | -2.6% | -1.1%                       | -1.4% | -0.1%                      | -0.1% | -0.1%                                         | -0.4% | -0.0%                        | -0.1% | -1.0%                                 | -1.1% | -2.3%     | -2.0% | -2.3%                   | -2.4% | -2.7%                                         |
| Malaysia                 |  | -1.5%              | -1.4% | -1.5%              | -1.4% | -1.7%                        | -1.7% | -3.3%   | -3.2% | -0.4%                                         | -0.6% | -3.0%                       | -3.0% | -1.7%                     | -1.8% | 1.3e+09% | 1.2e+09% | -1.9%        | -2.4% | -1.9%                       | -1.8% | -0.0%                      | -0.0% | -0.6%                                         | -0.6% | -0.2%                        | -0.2% | -1.0%                                 | -0.9% | -1.4%     | -1.2% | -2.2%                   | -2.2% | -2.7%                                         |
| Malta                    |  | -0.4%              | -0.4% | -0.5%              | -0.4% | -1.1%                        | -0.8% |         |       | 0.1%                                          | 0.2%  | -1.9%                       | -1.2% | -1.5%                     | -1.3% | -0.8%    | -1.4%    | -1.9%        | -1.9% | -1.8%                       | -1.6% | 0.0%                       | 0.0%  | -0.5%                                         | -1.0% | -0.1%                        | -0.1% | -0.8%                                 | -0.2% | -0.5%     | -0.2% | -1.5%                   | -0.9% | -0.5%                                         |
| Mauritius                |  | -0.9%              | -0.7% | -1.2%              | -1.4% | -2.4%                        | -2.3% |         |       | 0.1%                                          | 2.6%  | -1.4%                       | -1.8% | -1.1%                     | -1.1% | 10.1%    | 10.5%    | -0.6%        | -2.2% | -0.5%                       | -0.4% | -0.0%                      | -0.0% | -0.4%                                         | -0.7% | -0.2%                        | -0.2% | -1.4%                                 | -1.1% | -1.8%     | -1.9% | -2.2%                   | -2.3% | -1.4%                                         |
| Montenegro               |  | -0.8%              | -0.8% | -0.7%              | -0.8% | -2.1%                        | -1.9% |         |       | -1.5%                                         | -1.2% | -1.5%                       | -1.5% | -1.8%                     | -1.6% | 51.0%    | 58.5%    | -2.4%        | -2.4% | -0.6%                       | -0.5% | -0.0%                      | -0.0% | -0.5%                                         | -0.3% | -0.0%                        | -0.0% | -0.7%                                 | -1.0% | -0.6%     | -0.6% | -3.3%                   | -2.1% | -1.3%                                         |
| Niue                     |  | -0.7%              | -0.8% | -1.3%              | -1.1% | -1.0%                        | -1.1% |         |       | 2.0%                                          | 2.6%  | -1.3%                       | -1.4% | -1.8%                     | -1.8% | 544.4%   | 604.6%   | -2.1%        | -2.0% | 1.4%                        | -0.1% | -0.1%                      | -0.1% | 0.1%                                          | 0.1%  | -0.1%                        | -0.2% | -1.2%                                 | -0.8% | -1.6%     | -1.7% | -0.4%                   | -0.6% | -1.3%                                         |
| North Macedonia          |  | -0.8%              | -0.9% | -0.5%              | -0.7% | -2.2%                        | -2.1% |         |       | 31.3%                                         | 47.1% | -1.0%                       | -0.8% | -1.8%                     | -2.0% | 40.3%    | 46.8%    | -2.9%        | -2.9% | -1.5%                       | -1.3% | -0.0%                      | -0.0% | -0.3%                                         | -0.1% | -0.0%                        | -0.0% | -1.5%                                 | -1.4% | -0.9%     | -1.0% | -2.4%                   | -2.6% | -2.0%                                         |
| Northern Mariana Islands |  | -0.1%              | -0.2% | -0.5%              | -0.4% | -1.1%                        | -0.9% |         |       | 3.1%                                          | 0.3%  | -0.5%                       | -0.2% | 0.1%                      | -0.5% | 334.8%   | 398.8%   | -1.9%        | -2.1% | 2.6%                        | 1.8%  | 0.0%                       | -0.1% | -1.2%                                         | -1.1% | 0.0%                         | -0.1% | -0.7%                                 | -0.4% | -0.0%     | -0.3% | -0.2%                   | -0.7% |                                               |
| Oman                     |  | -1.8%              | -1.6% | -1.0%              | -0.5% | -2.0%                        | -2.0% | -3.3%   | -3.3% | 4.7%                                          | 6.8%  | -3.2%                       | -3.2% | -1.6%                     | -1.5% | 40.6%    | 33.0%    | -2.8%        | -2.8% | -2.2%                       | -2.2% | -0.0%                      | -0.0% | -0.3%                                         | -0.6% | -0.1%                        | -0.1% | -1.8%                                 | -1.7% | -2.5%     | -1.7% | -2.7%                   | -2.5% | -2.9%                                         |
| Palau                    |  | -1.0%              | -1.1% | -1.6%              | -1.6% | -1.3%                        | -1.5% |         |       | 2.1%                                          | 3.2%  | -1.9%                       | -2.0% | -1.7%                     | -0.9% | 613.6%   | 679.7%   | -1.9%        | -2.1% | 1.6%                        | 1.4%  | -0.0%                      | -0.0% | 0.1%                                          | -0.1% | -0.0%                        | -0.1% | -1.0%                                 | -0.6% | -1.5%     | -2.2% | -1.1%                   | -1.4% | -0.9%                                         |
| Poland                   |  | -0.8%              | -0.9% | -0.7%              | -0.7% | -1.3%                        | -1.4% |         |       | -2.6%                                         | -2.7% | -2.4%                       | -2.2% | -2.2%                     | -2.5% | 9.7%     | 6.8%     | -2.6%        | -2.7% | -1.5%                       | -1.5% | -0.0%                      | -0.0% | -0.0%                                         | -1.6% | -0.2%                        | -0.3% | -1.4%                                 | -1.4% | -0.8%     | -1.2% | -2.9%                   | -3.0% | -3.1%                                         |
| Portugal                 |  | -0.9%              | -1.2% | -0.4%              | -0.6% | -2.5%                        | -2.6% |         |       | -1.8%                                         | -1.3% | -1.9%                       | -2.7% | -2.6%                     | -2.5% | 2.9%     | -0.1%    | -2.9%        | -3.0% | -2.2%                       | -1.9% | 0.0%                       | -0.0% | -2.0%                                         | -2.8% | -0.2%                        | -0.1% | -1.5%                                 | -1.4% | -1.6%     | -1.3% | -3.0%                   | -3.0% | -2.6%                                         |
| Republic of Moldova      |  | -0.3%              | -0.4% | -0.0%              | -0.0% | -1.6%                        | -1.4% |         |       | 2.4%                                          | 4.4%  | -2.3%                       | -1.0% | -1.8%                     | -1.9% | 19.5%    | 1.3%     | -1.5%        | -1.9% | -1.3%                       | -1.4% | -0.1%                      | -0.1% | -1.8%                                         | -1.4% | -0.1%                        | -0.1% | -0.8%                                 | -0.7% | -2.3%     | -2.9% | -2.6%                   | -2.7% | -2.5%                                         |
| Romania                  |  | -1.4%              | -1.5% | -0.6%              | -0.6% | -2.1%                        | -2.1% |         |       | -0.4%                                         | 2.4%  | -2.0%                       | -2.4% | -2.4%                     | -2.6% | -1.3%    | -0.1%    | -1.7%        | -2.2% | -2.0%                       | -2.2% | 0.2%                       | 0.2%  | -0.3%                                         | -0.8% | -0.2%                        | -0.2% | -1.9%                                 | -2.1% | -2.5%     | -2.7% | -2.6%                   | -2.7% | -1.1%                                         |
| Russian Federation       |  | -0.5%              | -0.7% | -0.4%              | -0.5% | -1.1%                        | -1.2% |         |       | -0.1%                                         | 0.3%  | -2.3%                       | -2.5% | -1.6%                     | -1.3% | 1.1%     | 1.2%     | -2.1%        | -2.4% | -1.4%                       | -1.4% | 0.0%                       | 0.0%  | -0.6%                                         | -1.7% | -0.2%                        | -0.2% | -0.8%                                 | -0.8% | -1.1%     | -1.2% | -2.4%                   | -2.7% | -3.8%                                         |
| Saint Kitts and Nevis    |  | -0.8%              | -0.7% | -0.6%              | -0.8% | -1.4%                        | -1.3% |         |       | 3.3%                                          | 3.5%  | -2.2%                       | -1.6% | -2.3%                     | -2.4% | 95.8%    | 91.5%    | -2.5%        | -2.4% | -0.6%                       | -0.5% | 0.0%                       | -0.1% | 0.2%                                          | -1.9% | -0.2%                        | -0.4% | -1.1%                                 | -0.6% | -2.6%     | -1.8% | -2.5%                   | -2.4% | -1.6%                                         |
| Saudi Arabia             |  | -2.3%              | -2.2% | -1.7%              | -1.4% | -2.5%                        | -2.4% | -2.3%   | -2.7% | 0.1%                                          | 1.0%  | -3.3%                       | -3.3% | -2.4%                     | -2.6% | 14.9%    | 15.9%    | -3.0%        | -2.8% | -2.3%                       | -2.5% | -0.1%                      | -0.1% | -0.8%                                         | -0.7% | -0.1%                        | -0.1% | -1.3%                                 | -1.3% | -2.0%     | -2.1% | -2.9%                   | -2.9% | -3.0%                                         |
| Serbia                   |  | -1.1%              | -1.2% | -0.7%              | -0.7% | -2.6%                        | -2.6% |         |       | -2.1%                                         | -1.8% | -2.3%                       | -2.2% | -2.0%                     | -2.2% | 8.2%     | 12.6%    | -2.9%        | -3.0% | -1.9%                       | -2.3% | 0.0%                       | 0.0%  | -1.0%                                         | -1.0% | -0.1%                        | -0.0% | -1.2%                                 | -1.4% | -1.2%     | -1.2% | -2.7%                   | -2.9% | -1.7%                                         |
| Seychelles               |  | -1.1%              | -0.6% | -1.5%              | -0.5% | -1.0%                        | 0.7%  |         |       | 1.6%                                          | 1.2%  | -2.6%                       | -2.6% | -2.9%                     | -2.5% | 93.9%    | 78.0%    | 0.0%         | -1.8% | 0.9%                        | 1.3%  | -0.0%                      | -0.0% | -1.4%                                         | -0.2% | -0.2%                        | -0.2% | -0.9%                                 | 1.0%  | -1.7%     | -1.6% | -1.7%                   | -1.7% | -0.9%                                         |
| Spain                    |  | -0.6%              | -0.9% | -0.4%              | -0.4% | -2.3%                        | -2.5% |         |       | 0.2%                                          | 0.9%  | -0.9%                       | -1.0% | -2.4%                     | -2.3% | -2.3%    | -2.8%    | -2.8%        | -3.0% | -2.2%                       | -1.7% | 0.1%                       | 0.0%  | -1.0%                                         | -3.0% | -0.0%                        | -0.0% | -0.7%                                 | -0.9% | -0.5%     | -0.8% | -2.4%                   | -2.5% | -1.4%                                         |
| Sri Lanka                |  | -1.9%              | -2.0% | -2.1%              | -2.2% | -2.4%                        | -2.3% | -3.3%   | -3.3% | 3.8%                                          | 3.4%  | -3.2%                       | -3.2% | -2.3%                     | -2.3% | 11.4%    | 10.8%    | -2.2%        | -2.5% | -1.6%                       | -2.1% | -0.0%                      | -0.0% | -0.3%                                         | -0.6% | -0.3%                        | -0.3% | -1.9%                                 | -1.9% | -1.8%     | -1.8% | -2.3%                   | -2.4% | -2.8%                                         |
| Trinidad and Tobago      |  | -1.0%              |       |                    |       |                              |       |         |       |                                               |       |                             |       |                           |       |          |          |              |       |                             |       |                            |       |                                               |       |                              |       |                                       |       |           |       |                         |       |                                               |

|                            |                   | 5 to 14            |       |                    |       |                              |       |         |       |                                               |       |                             |       |                           |          |          |        |              |       |                             |       |                            |       |                                               |       |                              |       |                                       |       |           |       |                         |       |                                               |
|----------------------------|-------------------|--------------------|-------|--------------------|-------|------------------------------|-------|---------|-------|-----------------------------------------------|-------|-----------------------------|-------|---------------------------|----------|----------|--------|--------------|-------|-----------------------------|-------|----------------------------|-------|-----------------------------------------------|-------|------------------------------|-------|---------------------------------------|-------|-----------|-------|-------------------------|-------|-----------------------------------------------|
|                            |                   | Total communicable |       | Enteric infections |       | Lower respiratory infections |       | Malaria |       | Neonatal sepsis and other neonatal infections |       | Vaccine Preventable disease |       | Meningitis & Encephalitis |          | HIV/AIDS |        | Tuberculosis |       | Neglected Tropical diseases |       | Infectious skin conditions |       | Sexually transmitted infections excluding HIV |       | Upper respiratory infections |       | Other unspecified infectious diseases |       | Hepatitis |       | Rheumatic heart disease |       | Maternal sepsis and other maternal infections |
|                            |                   | Female             | Male  | Female             | Male  | Female                       | Male  | Female  | Male  | Female                                        | Male  | Female                      | Male  | Female                    | Male     | Female   | Male   | Female       | Male  | Female                      | Male  | Female                     | Male  | Female                                        | Male  | Female                       | Male  | Female                                | Male  | Female    | Male  | Female                  | Male  | Female                                        |
| High SDI                   | Andorra           | -0.4%              | -0.5% | -0.2%              | -0.2% | -2.0%                        | -2.1% |         |       | -0.7%                                         | -0.3% | -2.8%                       | -2.7% | -1.5%                     | -1.9%    | -1.9%    | -2.1%  | -2.5%        | -2.6% | -1.5%                       | -1.0% | 0.0%                       | 0.0%  | -0.6%                                         | -0.8% | -0.0%                        | -0.0% | -1.0%                                 | -1.0% | -2.3%     | -2.0% | -1.9%                   | -1.6% | -1.4%                                         |
|                            | Australia         | -0.2%              | -0.2% | 0.1%               | 0.3%  | -1.4%                        | -1.8% |         |       | -0.5%                                         | -0.5% | -0.3%                       | -0.4% | -1.8%                     | -1.9%    | -0.8%    | -1.0%  | -1.9%        | -2.3% | -1.0%                       | -1.0% | 0.0%                       | 0.0%  | -0.7%                                         | -1.9% | -0.1%                        | -0.1% | -0.1%                                 | -0.5% | -0.2%     | -0.3% | -2.1%                   | -2.3% | -1.5%                                         |
|                            | Austria           | -0.3%              | -0.5% | -0.3%              | -0.3% | -2.1%                        | -2.4% |         |       | 1.1%                                          | 0.9%  | -0.3%                       | 0.0%  | -1.4%                     | -2.1%    | -0.3%    | -2.1%  | -2.4%        | -2.6% | -1.7%                       | -1.4% | -0.0%                      | -0.1% | -0.1%                                         | -0.8% | -0.1%                        | -0.1% | 0.5%                                  | -0.0% | -0.5%     | -0.4% | -1.4%                   | -2.2% | -1.9%                                         |
|                            | Belgium           | -0.3%              | -0.4% | -0.3%              | -0.3% | -1.5%                        | -1.7% |         |       | -0.5%                                         | -1.0% | -1.3%                       | -1.2% | -1.3%                     | -1.4%    | -2.1%    | -2.5%  | -2.5%        | -2.5% | -1.7%                       | -1.3% | 0.0%                       | 0.0%  | -0.3%                                         | -2.2% | -0.1%                        | -0.1% | -0.1%                                 | -0.2% | -1.1%     | -0.7% | -0.8%                   | -1.0% | -2.7%                                         |
|                            | Bermuda           | -0.7%              | -0.6% | 1.4%               | 1.5%  | -1.5%                        | -0.9% |         |       | -2.1%                                         | 0.6%  | -0.9%                       | -0.4% | -2.2%                     | -2.0%    | -1.6%    | -2.4%  | -2.3%        | -2.2% | -1.5%                       | -1.0% | -0.0%                      | -0.0% | -0.1%                                         | -0.8% | -0.1%                        | -0.1% | -1.6%                                 | -1.2% | -1.0%     | -0.6% | -2.7%                   | -2.4% | -2.5%                                         |
|                            | Brunei Darussalam | -0.4%              | -1.1% | -0.9%              | -0.8% | 0.4%                         | -1.4% |         |       | -4.7%                                         | 3.9%  | -1.6%                       | -1.9% | -1.5%                     | -1.8%    | 14.3%    | 19.2%  | -2.2%        | -2.8% | -0.8%                       | -1.5% | -0.0%                      | -0.0% | -0.1%                                         | -1.2% | -0.0%                        | -0.1% | -0.3%                                 | -0.8% | -1.5%     | -1.9% | -1.9%                   | -2.6% | -1.6%                                         |
|                            | Canada            | -0.1%              | -0.2% | 0.6%               | 0.6%  | -1.8%                        | -2.0% |         |       | 3.3%                                          | -1.0% | -1.0%                       | -1.3% | -1.7%                     | -1.7%    | -0.3%    | -2.4%  | 1.6%         | -2.1% | -1.4%                       | -1.2% | 0.0%                       | 0.0%  | -0.2%                                         | -0.6% | -0.1%                        | -0.1% | -0.5%                                 | -0.5% | -0.5%     | -0.4% | -1.9%                   | -1.6% | -1.6%                                         |
|                            | Cyprus            | -0.4%              | -0.8% | -0.6%              | -0.6% | -1.5%                        | -2.2% |         |       | 0.0%                                          | 0.1%  | -2.8%                       | -2.8% | -1.9%                     | -2.6%    | 14.8%    | 9.7%   | -2.6%        | -3.0% | -2.4%                       | -2.2% | -0.0%                      | -0.0% | -0.5%                                         | -0.7% | -0.0%                        | -0.0% | -1.2%                                 | -1.5% | -0.7%     | -1.0% | -1.7%                   | -2.4% | -2.7%                                         |
|                            | Czechia           | -0.5%              | -0.6% | -0.7%              | -0.7% | -1.8%                        | -1.8% |         |       | 2.7%                                          | 6.4%  | -0.7%                       | -0.8% | -1.6%                     | -1.7%    | 11.2%    | 3.7%   | -2.2%        | -2.4% | -1.3%                       | -1.3% | 0.1%                       | 0.1%  | -0.9%                                         | -1.4% | -0.2%                        | -0.1% | -1.1%                                 | -1.1% | -0.7%     | -1.0% | -2.7%                   | -2.9% | -3.0%                                         |
|                            | Denmark           | -0.4%              | -0.6% | -0.3%              | -0.2% | -1.8%                        | -2.1% |         |       | 0.3%                                          | 0.6%  | -0.6%                       | -2.3% | -2.5%                     | -2.6%    | 5.5%     | 4.9%   | -2.6%        | -2.7% | -1.7%                       | -1.3% | 0.0%                       | 0.0%  | -0.5%                                         | -0.6% | -0.0%                        | -0.0% | -0.7%                                 | -0.6% | -1.5%     | -0.6% | -1.8%                   | -2.4% | -0.5%                                         |
|                            | Estonia           | -0.4%              | -1.1% | 0.7%               | -0.2% | -1.6%                        | -2.1% |         |       | -1.3%                                         | -2.6% | -1.9%                       | -1.7% | -2.2%                     | -2.1%    | 36.5%    | 4.6%   | -2.4%        | -2.4% | -1.7%                       | -1.7% | -0.0%                      | -0.0% | -0.4%                                         | -3.0% | -0.1%                        | -0.1% | -0.9%                                 | -1.0% | -1.0%     | -1.4% | -2.2%                   | -2.8% | -2.6%                                         |
|                            | Finland           | -0.4%              | -0.6% | -0.5%              | -0.4% | -2.6%                        | -2.8% |         |       | -0.6%                                         | 0.3%  | -1.3%                       | -1.4% | -1.5%                     | -2.2%    | -2.0%    | -2.4%  | 1.8%         | -2.3% | 1.8%                        | -1.3% | 0.0%                       | -0.1% | -0.3%                                         | -0.6% | -0.1%                        | -0.0% | -0.7%                                 | -0.8% | 0.4%      | -0.2% | -0.9%                   | -1.9% | -2.8%                                         |
|                            | France            | -0.4%              | -0.6% | -0.4%              | -0.3% | -2.0%                        | -2.2% |         |       | -1.3%                                         | -1.6% | -1.8%                       | -1.8% | -1.9%                     | -1.9%    | -2.1%    | -3.0%  | -2.5%        | -2.7% | -1.9%                       | -1.6% | -0.0%                      | -0.0% | -0.0%                                         | -1.6% | -0.1%                        | -0.1% | -0.7%                                 | -0.8% | -0.8%     | -1.1% | -1.7%                   | -1.8% | -0.6%                                         |
|                            | Germany           | -0.3%              | -0.6% | -0.2%              | -0.2% | -1.9%                        | -2.0% |         |       | -0.4%                                         | -0.4% | -1.3%                       | -1.4% | -2.1%                     | -1.9%    | -1.4%    | -2.9%  | -2.8%        | -2.9% | -1.8%                       | -1.5% | -0.0%                      | -0.0% | -0.4%                                         | -1.4% | -0.1%                        | -0.1% | -1.3%                                 | -1.0% | -0.6%     | -1.1% | -2.0%                   | -2.1% | -2.6%                                         |
|                            | Guam              | -0.3%              | -0.9% | -0.5%              | -0.9% | -0.4%                        | -2.3% |         |       | 0.3%                                          | 0.8%  | -0.9%                       | -1.3% | -0.4%                     | -2.1%    | 782.0%   | 849.2% | -1.2%        | -2.1% | -0.5%                       | -0.4% | 0.1%                       | 0.0%  | -0.0%                                         | -1.1% | -0.0%                        | -0.1% | -0.6%                                 | -0.5% | 0.3%      | -1.0% | -0.3%                   | -1.6% | -1.1%                                         |
|                            | Iceland           | -0.5%              | -0.5% | -0.4%              | -0.3% | -2.0%                        | -2.5% |         |       | 0.2%                                          | -0.7% | -0.5%                       | -0.5% | -2.1%                     | -2.0%    | -2.2%    | -2.5%  | -2.7%        | -2.5% | -1.4%                       | -1.0% | -0.0%                      | -0.0% | -0.6%                                         | -2.2% | -0.0%                        | -0.1% | -0.7%                                 | -0.5% | -0.4%     | -0.1% | -1.3%                   | -1.6% | -1.9%                                         |
|                            | Ireland           | -0.5%              | -0.7% | -0.5%              | -0.4% | -2.4%                        | -2.5% |         |       | 0.5%                                          | 1.5%  | -1.3%                       | -1.7% | -2.5%                     | -2.4%    | 0.0%     | -2.2%  | -2.1%        | -2.7% | -1.9%                       | -1.4% | 0.0%                       | -0.0% | -0.4%                                         | -1.4% | -0.0%                        | -0.0% | -0.5%                                 | -0.8% | -0.6%     | -0.7% | -1.5%                   | -1.2% | -0.4%                                         |
|                            | Japan             | -0.4%              | -0.5% | -1.3%              | -1.1% | -1.6%                        | -1.7% |         |       | -0.7%                                         | -0.6% | -2.4%                       | -2.3% | -1.7%                     | -1.8%    | 2.6%     | 4.6%   | -2.6%        | -2.8% | -1.3%                       | -1.2% | 0.0%                       | 0.0%  | 0.3%                                          | -1.0% | -0.0%                        | -0.1% | -0.7%                                 | -0.7% | -0.2%     | -0.7% | -1.5%                   | -1.7% | -2.2%                                         |
|                            | Kuwait            | -0.7%              | -0.7% | -0.2%              | -0.1% | -1.1%                        | -1.5% |         |       | -2.0%                                         | -0.7% | -2.4%                       | -2.4% | -1.7%                     | -1.5%    | 0.7%     | -2.3%  | -2.7%        | -2.6% | -1.2%                       | -1.1% | -0.0%                      | 0.0%  | -0.3%                                         | -0.8% | -0.1%                        | -0.1% | -1.1%                                 | -0.8% | -1.8%     | -1.2% | -2.9%                   | -2.7% | -2.4%                                         |
|                            | Latvia            | -0.9%              | -0.9% | -0.5%              | -0.4% | -1.3%                        | -1.9% |         |       | -2.1%                                         | 0.6%  | -0.9%                       | -0.7% | -2.3%                     | -2.3%    | 7.9%     | 0.4%   | -2.4%        | -2.7% | -1.3%                       | -1.1% | -0.1%                      | -0.1% | 0.0%                                          | -0.6% | -0.1%                        | -0.1% | -0.4%                                 | -0.3% | -2.7%     | -2.7% | -2.4%                   | -2.8% | -2.4%                                         |
| Lithuania                  | -0.2%             | -0.4%              | 0.1%  | -0.3%              | -0.4% | -0.7%                        |       |         | 7.7%  | 5.3%                                          | -1.6% | -0.9%                       | -1.9% | -2.1%                     | 2.5%     | 14.6%    | -2.1%  | -2.1%        | -0.8% | -1.1%                       | 0.0%  | 0.0%                       | -0.2% | -1.1%                                         | -0.2% | -0.2%                        | -0.2% | -0.5%                                 | -0.9% | -0.0%     | -2.3% | -1.3%                   | -2.8% |                                               |
| Luxembourg                 | -0.6%             | -0.5%              | -0.3% | -0.2%              | -2.4% | -2.0%                        |       |         | -0.3% | -0.2%                                         | -2.4% | -2.0%                       | -2.3% | -2.1%                     | -2.2%    | -2.4%    | -2.7%  | -2.3%        | -2.0% | -1.4%                       | 0.0%  | 0.0%                       | -0.8% | -2.5%                                         | -0.1% | -0.1%                        | -1.3% | -1.0%                                 | -0.7% | -0.6%     | -2.3% | -1.7%                   | -2.5% |                                               |
| Monaco                     | -0.2%             | -0.4%              | -0.3% | -0.2%              | -1.5% | -1.7%                        |       |         | -0.5% | 0.2%                                          | -0.6% | -0.8%                       | -1.9% | -2.2%                     | -2.0%    | -2.2%    | -2.1%  | -2.6%        | -1.4% | -0.9%                       | -0.0% | -0.0%                      | -0.8% | -1.0%                                         | -0.0% | -0.0%                        | -0.4% | -0.3%                                 | -0.4% | -0.3%     | -0.5% | -1.3%                   | -1.8% |                                               |
| Netherlands                | -0.4%             | -0.6%              | -0.3% | -0.3%              | -1.6% | -1.9%                        |       |         | -0.5% | -0.9%                                         | 0.2%  | -0.1%                       | -2.1% | -2.1%                     | -2.0%    | -2.9%    | -2.5%  | -2.7%        | -1.6% | -0.8%                       | 0.0%  | 0.0%                       | -0.1% | -1.0%                                         | -0.1% | -0.1%                        | -0.2% | -0.0%                                 | -0.2% | -0.3%     | -0.8% | -1.3%                   | -1.9% |                                               |
| New Zealand                | -0.3%             | -0.5%              | -0.2% | -0.4%              | -2.3% | -2.6%                        |       |         | 1.8%  | 1.7%                                          | -1.6% | -1.7%                       | -1.4% | -1.8%                     | -2.3%    | -2.9%    | -2.3%  | -2.6%        | -1.3% | -0.7%                       | 0.0%  | -0.0%                      | 0.1%  | -1.3%                                         | -0.0% | -0.1%                        | -0.5% | -0.6%                                 | -0.5% | -0.7%     | -2.1% | -2.5%                   | -1.0% |                                               |
| Norway                     | -0.5%             | -0.6%              | -0.3% | -0.3%              | -2.5% | -2.5%                        |       |         | -0.3% | -0.2%                                         | -0.8% | -1.2%                       | -2.5% | -2.4%                     | 2.9%     | -2.7%    | -2.1%  | -2.4%        | -1.2% | -1.3%                       | -0.0% | -0.0%                      | -0.8% | 1.0%                                          | -0.2% | -0.1%                        | 0.0%  | -0.4%                                 | -0.2% | -0.3%     | -1.8% | -2.7%                   | -2.4% |                                               |
| Puerto Rico                | -0.5%             | -0.3%              | 1.2%  | 1.3%               | -2.1% | -2.2%                        |       |         | 0.1%  | 2.6%                                          | -1.2% | -1.3%                       | -2.4% | -2.7%                     | -2.1%    | -2.7%    | -2.4%  | -2.3%        | -0.6% | -0.5%                       | 0.0%  | 0.0%                       | -0.1% | -0.6%                                         | -0.1% | -0.2%                        | -1.1% | -0.7%                                 | -0.7% | -0.9%     | -2.6% | -1.9%                   | -2.2% |                                               |
| Qatar                      | -1.7%             | -1.6%              | -1.2% | -0.9%              | -1.9% | -2.1%                        |       |         | 1.6%  | 3.2%                                          | -3.2% | -3.2%                       | -2.1% | -1.6%                     | 1.0%     | 2.0%     | -2.8%  | -2.9%        | -2.2% | -2.1%                       | -0.0% | -0.0%                      | -0.8% | -0.8%                                         | -0.1% | -0.1%                        | -1.8% | -1.6%                                 | -0.9% | -1.4%     | -2.8% | -3.0%                   | -2.9% |                                               |
| Republic of Korea          | -1.6%             | -1.8%              | -1.8% | -2.1%              | -3.0% | -3.0%                        | -3.2% | -3.3%   | -0.2% | 1.7%                                          | -2.9% | -2.9%                       | -2.7% | -2.6%                     | -0.5%    | -1.2%    | -3.2%  | -3.2%        | -1.9% | -1.8%                       | 0.0%  | 0.0%                       | -0.8% | -0.2%                                         | 0.0%  | -0.0%                        | -1.8% | -1.8%                                 | -2.3% | -2.2%     | -2.9% | -2.8%                   | -3.2% |                                               |
| San Marino                 | -0.3%             | -0.4%              | -0.3% | -0.2%              | -1.5% | -1.9%                        |       |         | -0.3% | 0.1%                                          | 2.3%  | 1.8%                        | -1.6% | -1.3%                     | -1.7%    | -1.9%    | -2.5%  | -2.7%        | -1.3% | -1.2%                       | 0.0%  | 0.0%                       | -0.4% | -0.5%                                         | -0.1% | -0.0%                        | -0.5% | -0.8%                                 | -1.3% | -1.4%     | -1.7% | -1.9%                   | -1.5% |                                               |
| Singapore                  | -0.8%             | -1.0%              | -1.2% | -1.8%              | -2.2% | -2.1%                        |       |         | 5.5%  | 3.8%                                          | -1.8% | -1.8%                       | -2.1% | -2.0%                     | 3.8%     | 2.6%     | -2.8%  | -3.0%        | -1.4% | -1.3%                       | 0.0%  | 0.0%                       | -0.7% | -1.8%                                         | -0.0% | 0.0%                         | -1.7% | -1.5%                                 | -0.7% | -1.2%     | -3.0% | -2.9%                   | -1.8% |                                               |
| Slovakia                   | -1.1%             | -1.0%              | -0.8% | -0.8%              | -2.3% | -2.4%                        |       |         | -0.2% | 1.6%                                          | 1.6%  | 1.0%                        | -1.8% | -1.4%                     | 8.2e+13% | 6.1e+13% | -2.6%  | -2.7%        | -1.1% | -1.2%                       | 0.0%  | 0.0%                       | -0.6% | -0.5%                                         | -0.1% | -0.1%                        | -0.7% | -1.1%                                 | -0.5% | -0.8%     | -2.1% | -2.2%                   | -2.3% |                                               |
| Slovenia                   | -0.5%             | -0.6%              | -0.7% | -0.7%              | -1.6% | -2.1%                        |       |         | -0.6% | 1.0%                                          | -0.0% | 0.3%                        | -1.7% | -2.1%                     | -2.4%    | -1.8%    | -2.3%  | -2.6%        | -1.7% | -1.9%                       | 0.1%  | 0.1%                       | -0.4% | -1.1%                                         | -0.1% | -0.1%                        | -0.7% | -0.9%                                 | -0.3% | -0.4%     | -2.1% | -1.2%                   | -2.2% |                                               |
| Sweden                     | -0.2%             | -0.4%              | -0.3% | -0.3%              | -2.0% | -2.2%                        |       |         | -0.6% | -0.9%                                         | 0.1%  | -0.6%                       | -1.7% | -1.8%                     | -0.6%    | -2.5%    | -2.0%  | -2.3%        | -1.4% | -0.8%                       | 0.0%  | 0.0%                       | -0.4% | -1.0%                                         | -0.0% | -0.0%                        | 0.2%  | -0.1%                                 | -0.4% | -0.4%     | -1.8% | -2.1%                   | -2.8% |                                               |
| Switzerland                | -0.3%             | -0.5%              | -0.2% | -0.2%              | -2.4% | -2.6%                        |       |         | -2.2% | 0.1%                                          | -0.9% | -2.1%                       | -2.1% | -2.6%                     | 12.4%    | 6.8%     | -2.1%  | -2.7%        | -1.5% | -1.0%                       | 0.0%  | 0.0%                       | 0.0%  | -0.5%                                         | -0.1% | -0.0%                        | -0.4% | -0.6%                                 | -0.7% | 0.6%      | -2.2% | -1.7%                   | -1.2% |                                               |
| Taiwan (Province of China) | -0.7%             | -0.7%              | -0.3% | -0.1%              | -1.7% | -1.7%                        |       |         | 9.1%  | 7.2%                                          | -2.4% | -2.3%                       | -1.6% | -1.6%                     | 21.8%    | 17.9%    | -2.1%  | -2.2%        | -1.6% | -1.6%                       | 0.1%  | 0.0%                       | -0.3% | -1.2%                                         | -0.2% | -0.3%                        | -0.4% | -0.2%                                 | -0.8% | -1.2%     | -2.8% | -2.8%                   | -1.5% |                                               |
| United Arab Emirates       | -1.5%             | -1.6%              | -0.9% | -0.7%              | -2.2% | -2.4%                        | -3.3% | -3.3%   | 1.3%  | 5.2%                                          | -3.1% | -3.0%                       | -2.3% | -2.4%                     | 44.9%    | 44.9%    | -2.7%  | -2.7%        | -1.4% | -1.5%                       | -0.1% | -0.1%                      | -0.8% | -0.7%                                         | -0.1% | -0.1%                        | -1.2% | -1.4%                                 | -1.5% | -1.7%     | -2.2% | -2.2%                   | -2.6% |                                               |
| United Kingdom             | -0.4%             | -0.6%              | -0.4% | -0.3%              | -1.7% | -1.9%                        |       |         | -0.1% | 0.0%                                          | -1.7% | -1.6%                       | -2.0% | -2.0%                     | 0.7%     | -2.4%    | -2.1%  | -2.4%        | -1.4% | -0.9%                       | 0.0%  | 0.0%                       | -0.0% | -0.9%                                         | -0.1% | -0.1%                        | -0.9% | -0.7%                                 | -0.0% | 0.1%      | 2.4%  | -3.4%                   | -1.5% |                                               |
| United States of America   | -0.3%             | -0.4%              | 0.1%  | -0.2%              | -1.1% | -1.2%                        |       |         | -0.9% | -1.1%                                         | -1.5% | -1.5%                       | -1.9% | -1.8%                     | -2.9%    | -2.9%    | -2.5%  | -2.6%        | 0.2%  | 0.2%                        | 0.0%  | 0.0%                       | -0.2% | -1.3%                                         | -0.1% | -0.1%                        | -0.5% | -0.5%                                 | -0.2% | -0.2%     | -1.9% | -1.8%                   | -1.2% |                                               |

**S14. (A)** Communicable disease DALYs by cause for 15-24 year age group by sex in 2019, grouped by SDI. The shading ranges from green which indicates a low number of DALYs per 100,000 for that country with in the disease, while the highest rates are shaded in a dark orange colour and indicates a country has a large DALY burden.

|                             |                    | 15 to 24 years, DALYs/100,000, for males and females, 2019 |       |                              |       |         |       |                                               |      |                             |      |                           |      |          |        |              |       |                             |       |                            |      |                                               |      |                              |      |                                       |      |           |      |                         |      |                                               |     |
|-----------------------------|--------------------|------------------------------------------------------------|-------|------------------------------|-------|---------|-------|-----------------------------------------------|------|-----------------------------|------|---------------------------|------|----------|--------|--------------|-------|-----------------------------|-------|----------------------------|------|-----------------------------------------------|------|------------------------------|------|---------------------------------------|------|-----------|------|-------------------------|------|-----------------------------------------------|-----|
|                             | Total communicable | Enteric infections                                         |       | Lower respiratory infections |       | Malaria |       | Neonatal sepsis and other neonatal infections |      | Vaccine Preventable disease |      | Meningitis & Encephalitis |      | HIV/AIDS |        | Tuberculosis |       | Neglected Tropical diseases |       | Infectious skin conditions |      | Sexually transmitted infections excluding HIV |      | Upper respiratory infections |      | Other unspecified infectious diseases |      | Hepatitis |      | Rheumatic heart disease |      | Maternal sepsis and other maternal infections |     |
|                             |                    | Female                                                     | Male  | Female                       | Male  | Female  | Male  | Female                                        | Male | Female                      | Male | Female                    | Male | Female   | Male   | Female       | Male  | Female                      | Male  | Female                     | Male | Female                                        | Male | Female                       | Male | Female                                | Male | Female    | Male | Female                  | Male | Female                                        |     |
| Low SDI                     |                    |                                                            |       |                              |       |         |       |                                               |      |                             |      |                           |      |          |        |              |       |                             |       |                            |      |                                               |      |                              |      |                                       |      |           |      |                         |      |                                               |     |
| Afghanistan                 | 3,087              | 2,195                                                      | 316   | 321                          | 269   | 271     | 240   | 147                                           | 7    | 11                          | 77   | 49                        | 238  | 153      | 35     | 36           | 329   | 153                         | 597   | 490                        | 96   | 100                                           | 11   | 10                           | 122  | 133                                   | 266  | 93        | 167  | 154                     | 134  | 75                                            | 193 |
| Benin                       | 5,038              | 6,084                                                      | 647   | 800                          | 402   | 436     | 1,730 | 2,401                                         | 37   | 23                          | 79   | 96                        | 329  | 422      | 543    | 527          | 334   | 525                         | 343   | 341                        | 129  | 149                                           | 33   | 11                           | 95   | 134                                   | 21   | 11        | 69   | 125                     | 100  | 92                                            | 149 |
| Burkina Faso                | 5,423              | 6,176                                                      | 988   | 1,090                        | 418   | 432     | 1,727 | 2,027                                         | 31   | 30                          | 49   | 52                        | 393  | 464      | 497    | 619          | 489   | 701                         | 175   | 250                        | 130  | 142                                           | 47   | 9                            | 103  | 149                                   | 21   | 20        | 76   | 100                     | 102  | 90                                            | 178 |
| Burundi                     | 6,852              | 8,496                                                      | 1,052 | 1,570                        | 607   | 652     | 783   | 656                                           | 53   | 47                          | 49   | 102                       | 380  | 498      | 760    | 864          | 1,589 | 2,661                       | 483   | 714                        | 191  | 229                                           | 66   | 20                           | 112  | 131                                   | 17   | 15        | 96   | 168                     | 174  | 181                                           | 439 |
| Central African Republic    | 11,669             | 13,878                                                     | 1,127 | 2,189                        | 572   | 955     | 1,051 | 2,378                                         | 11   | 9                           | 95   | 118                       | 486  | 700      | 3,696  | 2,277        | 2,556 | 3,283                       | 732   | 1,041                      | 127  | 157                                           | 41   | 16                           | 155  | 188                                   | 41   | 81        | 68   | 259                     | 167  | 228                                           | 743 |
| Chad                        | 5,871              | 6,914                                                      | 912   | 1,339                        | 462   | 602     | 610   | 1,038                                         | 18   | 21                          | 101  | 190                       | 442  | 671      | 1,062  | 664          | 711   | 1,188                       | 547   | 542                        | 129  | 155                                           | 41   | 9                            | 106  | 145                                   | 24   | 25        | 94   | 217                     | 114  | 108                                           | 498 |
| Côte d'Ivoire               | 6,333              | 8,128                                                      | 544   | 655                          | 389   | 479     | 2,021 | 3,027                                         | 38   | 43                          | 24   | 38                        | 284  | 376      | 1,735  | 1,560        | 443   | 746                         | 307   | 675                        | 130  | 148                                           | 37   | 9                            | 103  | 138                                   | 22   | 22        | 54   | 123                     | 97   | 89                                            | 105 |
| Dem. Rep. of the Congo      | 6,068              | 6,381                                                      | 413   | 864                          | 410   | 537     | 817   | 1,002                                         | 25   | 24                          | 105  | 119                       | 295  | 323      | 493    | 302          | 1,133 | 1,151                       | 1,333 | 1,354                      | 122  | 139                                           | 33   | 14                           | 127  | 157                                   | 39   | 57        | 52   | 184                     | 128  | 152                                           | 544 |
| Eritrea                     | 5,124              | 8,212                                                      | 784   | 2,136                        | 494   | 1,041   | 406   | 526                                           | 53   | 54                          | 28   | 63                        | 299  | 552      | 764    | 557          | 905   | 2,239                       | 316   | 246                        | 191  | 229                                           | 60   | 16                           | 122  | 143                                   | 26   | 27        | 69   | 195                     | 164  | 188                                           | 441 |
| Ethiopia                    | 4,644              | 5,289                                                      | 784   | 960                          | 272   | 352     | 135   | 108                                           | 74   | 76                          | 51   | 72                        | 323  | 480      | 1,172  | 883          | 507   | 962                         | 489   | 613                        | 269  | 307                                           | 50   | 13                           | 107  | 126                                   | 15   | 14        | 83   | 194                     | 129  | 130                                           | 185 |
| Gambia                      | 4,449              | 5,675                                                      | 464   | 791                          | 312   | 602     | 595   | 1,088                                         | 74   | 67                          | 20   | 37                        | 272  | 637      | 1,335  | 646          | 365   | 937                         | 399   | 267                        | 127  | 151                                           | 36   | 8                            | 75   | 119                                   | 35   | 22        | 61   | 206                     | 92   | 97                                            | 187 |
| Guinea                      | 6,640              | 6,975                                                      | 846   | 1,168                        | 603   | 672     | 1,094 | 1,340                                         | 25   | 24                          | 66   | 94                        | 514  | 654      | 1,278  | 537          | 533   | 819                         | 831   | 999                        | 131  | 155                                           | 44   | 9                            | 98   | 140                                   | 25   | 19        | 102  | 256                     | 108  | 90                                            | 342 |
| Guinea-Bissau               | 6,024              | 7,153                                                      | 886   | 910                          | 550   | 792     | 444   | 696                                           | 37   | 32                          | 189  | 222                       | 479  | 774      | 1,692  | 1,411        | 544   | 1,163                       | 565   | 473                        | 131  | 155                                           | 45   | 9                            | 99   | 145                                   | 30   | 25        | 93   | 215                     | 129  | 129                                           | 110 |
| Haiti                       | 4,487              | 2,749                                                      | 177   | 212                          | 377   | 205     | 377   | 323                                           | 37   | 27                          | 22   | 22                        | 116  | 100      | 1,501  | 956          | 390   | 179                         | 322   | 118                        | 194  | 205                                           | 34   | 15                           | 133  | 149                                   | 41   | 48        | 62   | 33                      | 326  | 157                                           | 377 |
| Liberia                     | 7,710              | 8,085                                                      | 730   | 835                          | 382   | 365     | 2,188 | 2,713                                         | 43   | 44                          | 42   | 47                        | 355  | 403      | 1,012  | 551          | 424   | 572                         | 1,660 | 1,968                      | 128  | 146                                           | 43   | 9                            | 112  | 159                                   | 22   | 18        | 79   | 166                     | 101  | 91                                            | 389 |
| Madagascar                  | 5,270              | 6,238                                                      | 902   | 1,598                        | 643   | 664     | 468   | 579                                           | 48   | 47                          | 72   | 76                        | 321  | 359      | 305    | 85           | 1,036 | 1,588                       | 316   | 266                        | 187  | 217                                           | 68   | 17                           | 118  | 138                                   | 200  | 231       | 82   | 129                     | 227  | 245                                           | 278 |
| Malawi                      | 6,819              | 8,019                                                      | 819   | 1,334                        | 317   | 560     | 766   | 937                                           | 58   | 56                          | 42   | 101                       | 360  | 731      | 2,788  | 1,600        | 712   | 1,654                       | 219   | 242                        | 188  | 226                                           | 51   | 18                           | 134  | 157                                   | 21   | 20        | 64   | 227                     | 147  | 156                                           | 132 |
| Mali                        | 4,812              | 5,383                                                      | 953   | 1,429                        | 177   | 204     | 748   | 1,087                                         | 34   | 21                          | 69   | 97                        | 430  | 893      | 704    | 360          | 489   | 429                         | 291   | 250                        | 164  | 195                                           | 52   | 9                            | 89   | 136                                   | 32   | 32        | 91   | 138                     | 139  | 104                                           | 360 |
| Mozambique                  | 17,208             | 14,820                                                     | 467   | 1,046                        | 345   | 604     | 1,422 | 1,994                                         | 48   | 50                          | 33   | 64                        | 225  | 480      | 12,503 | 6,535        | 1,153 | 2,861                       | 301   | 393                        | 189  | 231                                           | 77   | 20                           | 111  | 134                                   | 17   | 22        | 56   | 220                     | 136  | 168                                           | 126 |
| Nepal                       | 2,141              | 2,528                                                      | 584   | 589                          | 106   | 125     | 2     | 1                                             | 110  | 71                          | 39   | 30                        | 112  | 117      | 73     | 102          | 228   | 394                         | 343   | 339                        | 137  | 194                                           | 14   | 6                            | 122  | 139                                   | 20   | 12        | 104  | 177                     | 112  | 232                                           | 32  |
| Niger                       | 4,785              | 5,860                                                      | 875   | 1,149                        | 411   | 427     | 1,048 | 1,875                                         | 27   | 25                          | 164  | 188                       | 402  | 479      | 196    | 152          | 413   | 678                         | 223   | 318                        | 141  | 158                                           | 40   | 9                            | 95   | 148                                   | 24   | 23        | 90   | 126                     | 118  | 104                                           | 516 |
| Pakistan                    | 3,638              | 4,394                                                      | 1,081 | 1,466                        | 73    | 217     | 76    | 55                                            | 40   | 28                          | 56   | 35                        | 192  | 349      | 40     | 56           | 927   | 769                         | 145   | 137                        | 153  | 184                                           | 8    | 4                            | 118  | 135                                   | 45   | 303       | 251  | 243                     | 345  | 414                                           | 86  |
| Papua New Guinea            | 4,824              | 5,477                                                      | 548   | 857                          | 269   | 337     | 724   | 919                                           | 15   | 22                          | 47   | 48                        | 108  | 197      | 1,030  | 390          | 495   | 503                         | 359   | 791                        | 322  | 345                                           | 25   | 8                            | 106  | 117                                   | 69   | 273       | 48   | 83                      | 475  | 587                                           | 186 |
| Rwanda                      | 4,155              | 4,747                                                      | 607   | 847                          | 366   | 406     | 368   | 438                                           | 76   | 69                          | 27   | 33                        | 255  | 337      | 819    | 554          | 525   | 966                         | 369   | 414                        | 167  | 198                                           | 57   | 17                           | 123  | 139                                   | 23   | 17        | 78   | 174                     | 137  | 136                                           | 159 |
| Senegal                     | 3,934              | 5,146                                                      | 572   | 931                          | 294   | 426     | 828   | 1,428                                         | 53   | 58                          | 33   | 54                        | 334  | 545      | 346    | 200          | 329   | 657                         | 549   | 327                        | 129  | 150                                           | 36   | 6                            | 97   | 138                                   | 37   | 36        | 51   | 100                     | 92   | 90                                            | 155 |
| Sierra Leone                | 7,219              | 8,007                                                      | 720   | 1,205                        | 500   | 525     | 2,340 | 3,189                                         | 27   | 23                          | 21   | 39                        | 407  | 545      | 1,508  | 668          | 501   | 611                         | 413   | 671                        | 127  | 147                                           | 41   | 9                            | 90   | 134                                   | 18   | 21        | 75   | 121                     | 113  | 97                                            | 320 |
| Solomon Islands             | 5,928              | 5,397                                                      | 840   | 775                          | 1,291 | 1,402   | 386   | 457                                           | 11   | 20                          | 27   | 20                        | 193  | 198      | 259    | 136          | 219   | 183                         | 949   | 634                        | 325  | 349                                           | 21   | 8                            | 111  | 124                                   | 358  | 352       | 133  | 191                     | 573  | 547                                           | 230 |
| Somalia                     | 8,259              | 9,971                                                      | 1,347 | 1,514                        | 605   | 780     | 333   | 367                                           | 26   | 22                          | 340  | 670                       | 581  | 842      | 642    | 424          | 2,040 | 3,624                       | 671   | 608                        | 191  | 230                                           | 84   | 28                           | 165  | 202                                   | 40   | 35        | 135  | 394                     | 200  | 232                                           | 859 |
| South Sudan                 | 7,134              | 7,682                                                      | 1,087 | 1,397                        | 325   | 347     | 603   | 608                                           | 31   | 28                          | 72   | 93                        | 307  | 438      | 1,655  | 642          | 737   | 1,343                       | 1,561 | 2,105                      | 194  | 226                                           | 61   | 18                           | 109  | 121                                   | 24   | 27        | 78   | 164                     | 134  | 125                                           | 157 |
| Togo                        | 5,900              | 6,711                                                      | 726   | 913                          | 406   | 518     | 1,732 | 2,240                                         | 53   | 43                          | 20   | 31                        | 293  | 385      | 1,412  | 1,149        | 433   | 643                         | 256   | 244                        | 129  | 148                                           | 33   | 9                            | 108  | 150                                   | 23   | 18        | 62   | 126                     | 98   | 96                                            | 116 |
| Uganda                      | 6,474              | 7,170                                                      | 580   | 935                          | 360   | 473     | 790   | 773                                           | 62   | 50                          | 63   | 72                        | 231  | 378      | 2,711  | 1,962        | 626   | 1,454                       | 299   | 361                        | 190  | 223                                           | 58   | 23                           | 138  | 156                                   | 17   | 17        | 61   | 128                     | 151  | 166                                           | 138 |
| United Republic of Tanzania | 5,334              | 5,946                                                      | 745   | 984                          | 334   | 413     | 415   | 313                                           | 62   | 52                          | 41   | 58                        | 154  | 255      | 1,790  | 1,648        | 620   | 1,166                       | 439   | 355                        | 218  | 256                                           | 57   | 19                           | 124  | 144                                   | 21   | 32        | 53   | 116                     | 133  | 134                                           | 128 |
| Yemen                       | 3,422              | 3,259                                                      | 258   | 269                          | 151   | 159     | 1,876 | 2,103                                         | 6    | 9                           | 16   | 18                        | 42   | 50       | 41     | 44           | 63    | 50                          | 358   | 157                        | 94   | 98                                            | 10   | 10                           | 135  | 148                                   | 50   | 19        | 40   | 54                      | 80   | 72                                            | 202 |

15 to 24 years, DALYs/100,000, for males and females, 2019

|                             | Total communicable |        | Enteric infections |       | Lower respiratory infections |       | Malaria |       | Neonatal sepsis and other neonatal infections |      | Vaccine Preventable disease |      | Meningitis & Encephalitis |      | HIV/AIDS |       | Tuberculosis |       | Neglected Tropical diseases |      | Infectious skin conditions |      | Sexually transmitted infections excluding HIV |      | Upper respiratory infections |      | Other unspecified infectious diseases |      | Hepatitis |      | Rheumatic heart disease |      | Maternal sepsis and other maternal infections |
|-----------------------------|--------------------|--------|--------------------|-------|------------------------------|-------|---------|-------|-----------------------------------------------|------|-----------------------------|------|---------------------------|------|----------|-------|--------------|-------|-----------------------------|------|----------------------------|------|-----------------------------------------------|------|------------------------------|------|---------------------------------------|------|-----------|------|-------------------------|------|-----------------------------------------------|
|                             | Female             | Male   | Female             | Male  | Female                       | Male  | Female  | Male  | Female                                        | Male | Female                      | Male | Female                    | Male | Female   | Male  | Female       | Male  | Female                      | Male | Female                     | Male | Female                                        | Male | Female                       | Male | Female                                | Male | Female    | Male | Female                  | Male | Female                                        |
|                             |                    |        |                    |       |                              |       |         |       |                                               |      |                             |      |                           |      |          |       |              |       |                             |      |                            |      |                                               |      |                              |      |                                       |      |           |      |                         |      |                                               |
| Angola                      | 5,926              | 5,299  | 565                | 815   | 301                          | 485   | 700     | 874   | 27                                            | 32   | 43                          | 50   | 280                       | 354  | 2,265    | 565   | 796          | 997   | 348                         | 419  | 123                        | 140  | 33                                            | 14   | 121                          | 141  | 46                                    | 65   | 56        | 208  | 121                     | 140  | 101                                           |
| Bangladesh                  | 2,008              | 2,050  | 625                | 595   | 111                          | 119   | 5       | 4     | 176                                           | 220  | 20                          | 13   | 95                        | 68   | 6        | 5     | 258          | 292   | 169                         | 159  | 149                        | 184  | 10                                            | 7    | 136                          | 152  | 20                                    | 23   | 99        | 98   | 120                     | 109  | 11                                            |
| Belize                      | 1,531              | 1,646  | 99                 | 138   | 161                          | 270   | 1       | 0     | 142                                           | 76   | 3                           | 5    | 44                        | 63   | 439      | 422   | 71           | 141   | 86                          | 59   | 188                        | 198  | 17                                            | 12   | 112                          | 123  | 24                                    | 19   | 19        | 34   | 91                      | 86   | 93                                            |
| Bhutan                      | 1,636              | 2,107  | 474                | 589   | 62                           | 96    | 4       | 2     | 100                                           | 78   | 6                           | 6    | 130                       | 201  | 76       | 123   | 175          | 215   | 101                         | 81   | 150                        | 180  | 13                                            | 6    | 107                          | 122  | 44                                    | 34   | 61        | 159  | 121                     | 215  | 12                                            |
| Bolivia                     | 1,574              | 1,797  | 138                | 169   | 213                          | 259   | 2       | 1     | 87                                            | 84   | 7                           | 9    | 50                        | 65   | 135      | 177   | 276          | 377   | 138                         | 171  | 211                        | 219  | 20                                            | 7    | 110                          | 119  | 18                                    | 39   | 16        | 32   | 82                      | 69   | 71                                            |
| Cabo Verde                  | 1,529              | 2,091  | 250                | 328   | 168                          | 342   | 81      | 90    | 100                                           | 88   | 5                           | 7    | 99                        | 247  | 256      | 283   | 117          | 132   | 82                          | 80   | 120                        | 140  | 29                                            | 10   | 91                           | 121  | 22                                    | 10   | 31        | 134  | 70                      | 81   | 8                                             |
| Cambodia                    | 2,370              | 2,963  | 289                | 360   | 331                          | 615   | 38      | 43    | 84                                            | 106  | 18                          | 32   | 46                        | 69   | 191      | 189   | 547          | 581   | 98                          | 61   | 248                        | 259  | 11                                            | 15   | 100                          | 119  | 51                                    | 83   | 165       | 326  | 117                     | 106  | 35                                            |
| Cameroon                    | 6,930              | 7,069  | 544                | 690   | 378                          | 475   | 1,437   | 2,180 | 42                                            | 41   | 52                          | 60   | 303                       | 413  | 2,674    | 1,486 | 389          | 610   | 508                         | 576  | 125                        | 140  | 45                                            | 13   | 116                          | 155  | 20                                    | 14   | 53        | 128  | 88                      | 86   | 154                                           |
| Comoros                     | 4,778              | 4,738  | 698                | 776   | 431                          | 341   | 1,682   | 1,434 | 81                                            | 72   | 58                          | 56   | 330                       | 307  | 7        | 10    | 716          | 885   | 114                         | 244  | 192                        | 218  | 61                                            | 15   | 125                          | 141  | 34                                    | 21   | 73        | 99   | 143                     | 121  | 34                                            |
| Congo                       | 7,002              | 6,481  | 324                | 658   | 301                          | 348   | 1,102   | 1,125 | 35                                            | 38   | 40                          | 40   | 227                       | 247  | 3,455    | 2,395 | 683          | 688   | 314                         | 352  | 124                        | 140  | 30                                            | 13   | 115                          | 137  | 38                                    | 48   | 47        | 126  | 118                     | 126  | 100                                           |
| Dem. People's Rep. of Korea | 1,099              | 1,341  | 107                | 109   | 110                          | 184   | 2       | 1     | 13                                            | 15   | 6                           | 7    | 61                        | 82   | 38       | 63    | 177          | 311   | 51                          | 13   | 260                        | 264  | 8                                             | 11   | 104                          | 120  | 22                                    | 12   | 28        | 74   | 74                      | 76   | 37                                            |
| Djibouti                    | 4,791              | 5,157  | 424                | 790   | 254                          | 456   | 526     | 573   | 68                                            | 64   | 31                          | 58   | 204                       | 372  | 1,948    | 1,003 | 398          | 1,061 | 73                          | 138  | 187                        | 219  | 54                                            | 16   | 115                          | 132  | 24                                    | 20   | 44        | 132  | 121                     | 123  | 318                                           |
| Dominican Republic          | 1,763              | 1,807  | 108                | 150   | 121                          | 163   | 6       | 5     | 302                                           | 253  | 9                           | 12   | 56                        | 80   | 214      | 191   | 195          | 272   | 248                         | 189  | 184                        | 189  | 27                                            | 24   | 103                          | 108  | 16                                    | 19   | 30        | 69   | 110                     | 84   | 33                                            |
| El Salvador                 | 876                | 1,145  | 79                 | 127   | 117                          | 238   | 0       | 1     | 33                                            | 25   | 5                           | 5    | 30                        | 50   | 108      | 186   | 16           | 32    | 99                          | 68   | 155                        | 167  | 18                                            | 9    | 112                          | 124  | 8                                     | 17   | 13        | 36   | 66                      | 58   | 18                                            |
| Eswatini                    | 14,409             | 10,470 | 629                | 1,072 | 554                          | 915   | 35      | 35    | 32                                            | 28   | 17                          | 21   | 200                       | 378  | 10,992   | 5,383 | 1,208        | 1,825 | 228                         | 186  | 128                        | 140  | 43                                            | 20   | 103                          | 125  | 32                                    | 54   | 33        | 134  | 137                     | 155  | 40                                            |
| Ghana                       | 5,462              | 6,506  | 555                | 638   | 251                          | 720   | 1,484   | 1,804 | 93                                            | 107  | 27                          | 32   | 452                       | 612  | 1,503    | 950   | 293          | 836   | 343                         | 340  | 93                         | 110  | 40                                            | 15   | 94                           | 127  | 23                                    | 15   | 82        | 126  | 90                      | 76   | 41                                            |
| Guatemala                   | 1,539              | 1,780  | 246                | 343   | 392                          | 521   | 3       | 0     | 27                                            | 23   | 5                           | 6    | 70                        | 87   | 99       | 138   | 62           | 84    | 195                         | 121  | 161                        | 178  | 27                                            | 8    | 105                          | 117  | 15                                    | 19   | 25        | 78   | 69                      | 56   | 41                                            |
| Honduras                    | 1,145              | 1,039  | 121                | 135   | 32                           | 81    | 2       | 1     | 85                                            | 69   | 7                           | 6    | 57                        | 53   | 41       | 42    | 82           | 60    | 271                         | 165  | 154                        | 166  | 20                                            | 9    | 118                          | 132  | 25                                    | 28   | 27        | 43   | 64                      | 51   | 40                                            |
| India                       | 2,965              | 2,781  | 954                | 861   | 168                          | 121   | 71      | 56    | 44                                            | 42   | 19                          | 16   | 200                       | 178  | 116      | 75    | 443          | 407   | 185                         | 242  | 178                        | 180  | 16                                            | 10   | 112                          | 129  | 68                                    | 51   | 148       | 218  | 195                     | 194  | 46                                            |
| Kenya                       | 6,938              | 7,728  | 842                | 1,316 | 307                          | 462   | 299     | 345   | 87                                            | 69   | 144                         | 229  | 347                       | 436  | 3,396    | 2,576 | 516          | 1,223 | 283                         | 352  | 201                        | 215  | 43                                            | 14   | 147                          | 170  | 19                                    | 18   | 94        | 181  | 117                     | 124  | 94                                            |
| Kiribati                    | 5,102              | 6,069  | 551                | 755   | 533                          | 740   | 0       | 0     | 8                                             | 17   | 56                          | 49   | 511                       | 648  | 49       | 26    | 1,714        | 1,611 | 308                         | 318  | 325                        | 356  | 24                                            | 8    | 111                          | 124  | 187                                   | 344  | 147       | 279  | 487                     | 794  | 92                                            |
| Kyrgyzstan                  | 1,012              | 993    | 182                | 171   | 96                           | 119   | 0       | 0     | 12                                            | 13   | 1                           | 1    | 69                        | 82   | 30       | 16    | 150          | 158   | 98                          | 41   | 78                         | 84   | 13                                            | 14   | 89                           | 103  | 24                                    | 8    | 49        | 89   | 97                      | 94   | 25                                            |
| Low-middle SDI              | 2,382              | 2,553  | 309                | 387   | 261                          | 307   | 42      | 36    | 71                                            | 95   | 40                          | 56   | 95                        | 125  | 72       | 155   | 488          | 479   | 318                         | 221  | 251                        | 260  | 12                                            | 15   | 111                          | 128  | 27                                    | 38   | 46        | 90   | 201                     | 160  | 39                                            |
| Lesotho                     | 20,783             | 14,120 | 873                | 1,631 | 749                          | 1,165 | 0       | 0     | 32                                            | 29   | 14                          | 20   | 254                       | 429  | 15,826   | 7,283 | 2,280        | 2,857 | 69                          | 48   | 128                        | 140  | 45                                            | 21   | 114                          | 150  | 32                                    | 55   | 41        | 119  | 156                     | 172  | 169                                           |
| Maldives                    | 947                | 1,167  | 184                | 272   | 37                           | 38    | 0       | 0     | 81                                            | 143  | 7                           | 7    | 28                        | 35   | 14       | 2     | 29           | 27    | 111                         | 181  | 247                        | 250  | 10                                            | 16   | 101                          | 118  | 24                                    | 12   | 12        | 22   | 57                      | 45   | 6                                             |
| Marshall Islands            | 3,167              | 3,009  | 290                | 279   | 666                          | 694   | 0       | 0     | 14                                            | 22   | 36                          | 30   | 118                       | 142  | 244      | 135   | 425          | 299   | 230                         | 151  | 323                        | 344  | 19                                            | 8    | 105                          | 116  | 55                                    | 100  | 61        | 126  | 533                     | 563  | 48                                            |
| Mauritania                  | 2,863              | 3,279  | 436                | 601   | 242                          | 247   | 952     | 1,316 | 95                                            | 96   | 19                          | 26   | 200                       | 212  | 8        | 13    | 188          | 205   | 196                         | 106  | 128                        | 143  | 35                                            | 9    | 95                           | 129  | 24                                    | 16   | 50        | 90   | 79                      | 71   | 118                                           |
| Micronesia (Fed States of)  | 2,948              | 3,191  | 277                | 314   | 646                          | 807   | 0       | 0     | 13                                            | 25   | 18                          | 17   | 108                       | 151  | 360      | 262   | 315          | 234   | 175                         | 142  | 321                        | 345  | 20                                            | 8    | 106                          | 118  | 56                                    | 110  | 53        | 125  | 496                     | 532  | 44                                            |
| Mongolia                    | 1,178              | 1,364  | 204                | 188   | 140                          | 150   | 0       | 0     | 12                                            | 16   | 5                           | 4    | 65                        | 97   | 4        | 8     | 259          | 410   | 62                          | 38   | 79                         | 86   | 15                                            | 15   | 84                           | 95   | 18                                    | 17   | 108       | 163  | 87                      | 78   | 35                                            |
| Morocco                     | 1,130              | 843    | 172                | 190   | 122                          | 111   | 0       | 0     | 8                                             | 14   | 16                          | 15   | 38                        | 41   | 59       | 41    | 296          | 53    | 77                          | 42   | 94                         | 97   | 12                                            | 12   | 115                          | 129  | 22                                    | 11   | 24        | 36   | 57                      | 50   | 17                                            |
| Myanmar                     | 2,312              | 3,041  | 331                | 411   | 150                          | 346   | 45      | 47    | 93                                            | 110  | 28                          | 41   | 63                        | 63   | 334      | 202   | 353          | 423   | 194                         | 288  | 252                        | 260  | 12                                            | 16   | 111                          | 130  | 170                                   | 428  | 45        | 182  | 78                      | 94   | 53                                            |
| Nicaragua                   | 966                | 1,167  | 64                 | 116   | 84                           | 150   | 9       | 5     | 43                                            | 36   | 3                           | 3    | 44                        | 75   | 183      | 242   | 39           | 56    | 100                         | 66   | 158                        | 170  | 18                                            | 9    | 106                          | 118  | 7                                     | 13   | 14        | 41   | 77                      | 66   | 19                                            |
| Nigeria                     | 5,235              | 5,687  | 870                | 901   | 204                          | 257   | 1,567   | 2,042 | 47                                            | 50   | 36                          | 60   | 256                       | 383  | 975      | 408   | 251          | 486   | 471                         | 526  | 172                        | 203  | 30                                            | 8    | 93                           | 123  | 33                                    | 25   | 62        | 131  | 87                      | 84   | 82                                            |
| Palestine                   | 664                | 756    | 172                | 172   | 99                           | 182   | 0       | 0     | 17                                            | 19   | 4                           | 4    | 26                        | 33   | 12       | 13    | 14           | 10    | 21                          | 13   | 95                         | 96   | 12                                            | 10   | 115                          | 125  | 10                                    | 13   | 19        | 31   | 36                      | 34   | 11                                            |
| Sao Tome and Principe       | 2,111              | 2,717  | 297                | 351   | 434                          | 699   | 356     | 263   | 66                                            | 86   | 34                          | 48   | 186                       | 155  | 3        | 5     | 126          | 233   | 139                         | 238  | 127                        | 145  | 34                                            | 9    | 96                           | 125  | 29                                    | 69   | 43        | 176  | 117                     | 115  | 25                                            |
| Sudan                       | 1,727              | 2,186  | 254                | 315   | 166                          | 180   | 165     | 753   | 6                                             | 9    | 19                          | 20   | 42                        | 57   | 361      | 110   | 56           | 68    | 158                         | 265  | 95                         | 100  | 16                                            | 10   | 115                          | 127  | 22                                    | 20   | 71        | 90   | 70                      | 64   | 110                                           |
| Tajikistan                  | 1,455              | 1,563  | 272                | 242   | 345                          | 420   | 2       | 2     | 18                                            | 21   | 6                           | 6    | 74                        | 75   | 17       | 3     | 256          | 298   | 73                          | 51   | 76                         | 80   | 18                                            | 26   | 74                           | 92   | 16                                    | 10   | 81        | 135  | 112                     | 103  | 16                                            |
| Timor-Leste                 | 2,302              | 2,789  | 279                | 419   | 212                          | 291   | 4       | 4     | 65                                            | 79   | 25                          | 39   | 88                        | 117  | 480      | 483   | 344          | 373   | 117                         | 341  | 270                        | 279  | 11                                            | 15   | 105                          | 122  | 22                                    | 32   | 38        | 68   | 144                     | 126  | 98                                            |
| Tuvalu                      | 2,267              | 2,456  | 226                | 270   | 512                          | 580   | 0       | 0     | 18                                            | 31   | 27                          | 23   | 92                        | 127  | 147      | 159   | 220          | 133   | 133                         | 94   | 320                        | 341  | 19                                            | 8    | 105                          | 117  | 59                                    | 94   | 50        | 117  | 311                     | 364  | 29                                            |
| Vanuatu                     | 3,294              | 3,434  | 418                | 468   | 581                          | 737   | 28      | 24    | 11                                            | 20   | 36                          | 34   | 107                       | 158  | 265      | 134   | 376          | 356   | 343                         | 173  | 302                        | 325  | 19                                            | 8    | 107                          | 119  | 66                                    | 104  | 67        | 141  | 501                     | 634  | 66                                            |
| Venezuela                   | 1,643              | 1,522  | 87                 | 133   | 172                          | 158   | 284     | 204   | 249                                           | 188  | 6                           | 6    | 72                        | 66   | 102      | 213   | 69           | 43    | 212                         | 170  | 152                        | 163  | 23                                            | 8    | 110                          | 123  | 16                                    | 16   | 17        | 19   | 17                      | 10   | 56                                            |
| Zambia                      | 9,041              | 9,335  | 798                | 985   | 399                          | 545   | 619     | 717   | 71                                            | 65   | 33                          | 63   | 417                       | 672  | 4,901    | 3,435 | 715          | 1,563 | 356                         | 419  | 191                        | 225  | 71                                            | 16   | 132                          | 151  | 21                                    | 61   | 85        | 266  | 146                     | 152  | 84                                            |
| Zimbabwe                    | 8,762              | 9,818  | 463                | 1,211 | 431                          | 1,119 | 191     | 227   | 37                                            | 40   | 33                          | 41   | 341                       | 577  | 4,675    | 3,162 | 1,370        | 2,306 | 235                         | 200  | 128                        | 139  | 45                                            | 19   | 124                          | 154  | 20                                    | 41   | 40        | 118  | 309                     | 465  | 320                                           |

15 to 24 years, DALYs/100,000, for males and females, 2019

|                             | Total communicable |       | Enteric infections |      | Lower respiratory infections |      | Malaria |       | Neonatal sepsis and other neonatal infections |      | Vaccine Preventable disease |      | Meningitis & Encephalitis |      | HIV/AIDS |       | Tuberculosis |       | Neglected Tropical diseases |      | Infectious skin conditions |      | Sexually transmitted infections excluding HIV |      | Upper respiratory infections |      | Other unspecified infectious diseases |      | Hepatitis |      | Rheumatic heart disease |      | Maternal sepsis and other maternal infections |
|-----------------------------|--------------------|-------|--------------------|------|------------------------------|------|---------|-------|-----------------------------------------------|------|-----------------------------|------|---------------------------|------|----------|-------|--------------|-------|-----------------------------|------|----------------------------|------|-----------------------------------------------|------|------------------------------|------|---------------------------------------|------|-----------|------|-------------------------|------|-----------------------------------------------|
|                             | Female             | Male  | Female             | Male | Female                       | Male | Female  | Male  | Female                                        | Male | Female                      | Male | Female                    | Male | Female   | Male  | Female       | Male  | Female                      | Male | Female                     | Male | Female                                        | Male | Female                       | Male | Female                                | Male | Female    | Male | Female                  | Male | Female                                        |
|                             |                    |       |                    |      |                              |      |         |       |                                               |      |                             |      |                           |      |          |       |              |       |                             |      |                            |      |                                               |      |                              |      |                                       |      |           |      |                         |      |                                               |
| Albania                     | 708                | 762   | 271                | 217  | 54                           | 108  | 0       | 0     | 6                                             | 6    | 3                           | 3    | 34                        | 55   | 2        | 4     | 2            | 3     | 8                           | 10   | 112                        | 116  | 10                                            | 6    | 105                          | 109  | 20                                    | 30   | 16        | 34   | 58                      | 64   | 9                                             |
| Algeria                     | 725                | 684   | 160                | 156  | 118                          | 110  | 1       | 1     | 13                                            | 18   | 6                           | 6    | 32                        | 36   | 15       | 13    | 21           | 13    | 38                          | 16   | 94                         | 97   | 10                                            | 10   | 108                          | 118  | 21                                    | 14   | 26        | 40   | 39                      | 36   | 22                                            |
| Armenia                     | 837                | 857   | 250                | 219  | 53                           | 120  | 0       | 0     | 117                                           | 62   | 1                           | 1    | 29                        | 43   | 4        | 8     | 29           | 45    | 96                          | 32   | 76                         | 80   | 13                                            | 14   | 116                          | 124  | 9                                     | 10   | 15        | 31   | 78                      | 68   | 12                                            |
| Azerbaijan                  | 1,041              | 1,309 | 239                | 215  | 175                          | 265  | 0       | 0     | 21                                            | 24   | 6                           | 6    | 68                        | 98   | 7        | 6     | 134          | 295   | 56                          | 32   | 76                         | 80   | 15                                            | 15   | 80                           | 92   | 19                                    | 8    | 38        | 79   | 94                      | 95   | 13                                            |
| Botswana                    | 9,278              | 7,381 | 349                | 554  | 660                          | 813  | 32      | 28    | 43                                            | 57   | 12                          | 13   | 186                       | 260  | 6,285    | 4,085 | 921          | 924   | 282                         | 155  | 124                        | 135  | 40                                            | 17   | 102                          | 123  | 34                                    | 43   | 26        | 54   | 124                     | 119  | 59                                            |
| Brazil                      | 1,240              | 1,281 | 112                | 103  | 130                          | 199  | 8       | 7     | 80                                            | 58   | 3                           | 5    | 35                        | 54   | 129      | 184   | 39           | 51    | 167                         | 118  | 215                        | 213  | 21                                            | 9    | 134                          | 146  | 35                                    | 32   | 15        | 28   | 86                      | 74   | 30                                            |
| China                       | 771                | 894   | 58                 | 58   | 28                           | 47   | 0       | 0     | 133                                           | 126  | 3                           | 3    | 24                        | 32   | 26       | 45    | 36           | 54    | 49                          | 57   | 249                        | 265  | 7                                             | 9    | 95                           | 106  | 7                                     | 7    | 18        | 48   | 35                      | 35   | 3                                             |
| Colombia                    | 887                | 1,101 | 48                 | 92   | 96                           | 129  | 10      | 9     | 147                                           | 148  | 4                           | 5    | 43                        | 62   | 74       | 175   | 31           | 32    | 76                          | 77   | 158                        | 174  | 22                                            | 9    | 133                          | 147  | 12                                    | 21   | 11        | 16   | 6                       | 5    | 24                                            |
| Costa Rica                  | 712                | 819   | 43                 | 84   | 35                           | 77   | 0       | 0     | 56                                            | 28   | 2                           | 2    | 43                        | 63   | 65       | 97    | 8            | 12    | 72                          | 42   | 151                        | 167  | 18                                            | 9    | 108                          | 120  | 11                                    | 18   | 14        | 29   | 78                      | 71   | 8                                             |
| Cuba                        | 753                | 851   | 69                 | 105  | 51                           | 66   | 0       | 0     | 85                                            | 61   | 3                           | 4    | 36                        | 43   | 21       | 120   | 4            | 4     | 40                          | 18   | 185                        | 200  | 25                                            | 12   | 113                          | 121  | 18                                    | 22   | 10        | 14   | 82                      | 71   | 11                                            |
| Ecuador                     | 1,167              | 1,577 | 130                | 140  | 165                          | 302  | 3       | 1     | 53                                            | 49   | 6                           | 8    | 40                        | 98   | 112      | 272   | 86           | 184   | 97                          | 102  | 211                        | 221  | 18                                            | 7    | 114                          | 123  | 13                                    | 16   | 13        | 27   | 73                      | 67   | 32                                            |
| Egypt                       | 822                | 1,061 | 159                | 163  | 161                          | 295  | 0       | 0     | 7                                             | 9    | 8                           | 7    | 52                        | 75   | 4        | 4     | 24           | 30    | 51                          | 56   | 105                        | 108  | 12                                            | 11   | 95                           | 107  | 15                                    | 14   | 45        | 115  | 68                      | 67   | 15                                            |
| Equatorial Guinea           | 9,921              | 5,883 | 187                | 326  | 202                          | 307  | 1,425   | 1,582 | 48                                            | 50   | 27                          | 31   | 148                       | 199  | 6,754    | 2,126 | 312          | 370   | 359                         | 378  | 120                        | 133  | 29                                            | 13   | 112                          | 127  | 32                                    | 44   | 31        | 93   | 96                      | 102  | 40                                            |
| Fiji                        | 2,122              | 2,712 | 225                | 286  | 367                          | 382  | 0       | 0     | 40                                            | 52   | 11                          | 10   | 81                        | 140  | 63       | 28    | 145          | 78    | 217                         | 511  | 348                        | 362  | 20                                            | 8    | 99                           | 105  | 140                                   | 322  | 40        | 59   | 305                     | 365  | 21                                            |
| Gabon                       | 5,004              | 4,701 | 166                | 368  | 168                          | 414  | 1,238   | 1,286 | 74                                            | 68   | 18                          | 21   | 150                       | 279  | 1,909    | 553   | 300          | 547   | 497                         | 556  | 122                        | 139  | 27                                            | 13   | 116                          | 136  | 44                                    | 56   | 35        | 150  | 99                      | 115  | 41                                            |
| Grenada                     | 1,170              | 1,149 | 113                | 150  | 186                          | 191  | 0       | 0     | 145                                           | 130  | 5                           | 4    | 41                        | 39   | 102      | 51    | 18           | 16    | 71                          | 41   | 201                        | 221  | 18                                            | 15   | 109                          | 117  | 23                                    | 45   | 14        | 23   | 118                     | 106  | 7                                             |
| Guyana                      | 2,239              | 2,860 | 133                | 185  | 220                          | 301  | 214     | 186   | 82                                            | 128  | 3                           | 4    | 72                        | 104  | 676      | 355   | 153          | 233   | 144                         | 825  | 185                        | 193  | 32                                            | 16   | 113                          | 119  | 27                                    | 49   | 27        | 51   | 127                     | 109  | 32                                            |
| Indonesia                   | 1,967              | 2,751 | 394                | 505  | 69                           | 113  | 29      | 22    | 71                                            | 113  | 17                          | 30   | 77                        | 130  | 108      | 153   | 454          | 710   | 185                         | 293  | 260                        | 270  | 7                                             | 18   | 127                          | 143  | 23                                    | 21   | 101       | 213  | 29                      | 19   | 17                                            |
| Iran (Islamic Republic of)  | 710                | 793   | 197                | 195  | 96                           | 134  | 1       | 1     | 11                                            | 38   | 4                           | 4    | 35                        | 38   | 27       | 17    | 15           | 12    | 9                           | 94   | 97                         | 9    | 10                                            | 114  | 125                          | 15   | 17                                    | 23   | 35        | 47   | 49                      | 8    |                                               |
| Iraq                        | 878                | 805   | 160                | 163  | 101                          | 92   | 0       | 0     | 21                                            | 27   | 11                          | 10   | 67                        | 65   | 12       | 5     | 60           | 37    | 151                         | 109  | 85                         | 89   | 12                                            | 10   | 107                          | 117  | 12                                    | 8    | 26        | 33   | 44                      | 40   | 9                                             |
| Jamaica                     | 1,305              | 1,140 | 72                 | 96   | 70                           | 65   | 0       | 0     | 238                                           | 185  | 2                           | 2    | 47                        | 43   | 280      | 203   | 10           | 13    | 92                          | 54   | 184                        | 190  | 18                                            | 13   | 112                          | 120  | 30                                    | 47   | 16        | 16   | 127                     | 93   | 8                                             |
| Mexico                      | 812                | 1,003 | 50                 | 79   | 88                           | 148  | 0       | 0     | 102                                           | 76   | 4                           | 4    | 39                        | 50   | 55       | 165   | 36           | 43    | 72                          | 50   | 160                        | 175  | 18                                            | 7    | 118                          | 131  | 12                                    | 15   | 13        | 34   | 30                      | 26   | 15                                            |
| Namibia                     | 7,790              | 7,528 | 365                | 735  | 396                          | 734  | 269     | 243   | 44                                            | 43   | 8                           | 10   | 126                       | 231  | 4,772    | 3,580 | 834          | 1,140 | 501                         | 317  | 125                        | 135  | 39                                            | 20   | 107                          | 129  | 28                                    | 42   | 23        | 52   | 109                     | 118  | 45                                            |
| Nauru                       | 2,465              | 2,964 | 204                | 240  | 635                          | 906  | 0       | 0     | 20                                            | 30   | 6                           | 6    | 90                        | 141  | 143      | 155   | 229          | 197   | 170                         | 143  | 319                        | 342  | 19                                            | 8    | 99                           | 108  | 51                                    | 104  | 51        | 127  | 398                     | 457  | 33                                            |
| Panama                      | 1,350              | 1,903 | 102                | 149  | 103                          | 138  | 2       | 0     | 176                                           | 117  | 2                           | 2    | 38                        | 59   | 260      | 895   | 130          | 109   | 117                         | 41   | 151                        | 166  | 20                                            | 8    | 107                          | 117  | 22                                    | 15   | 13        | 23   | 78                      | 64   | 29                                            |
| Paraguay                    | 1,059              | 1,163 | 118                | 130  | 103                          | 163  | 0       | 0     | 14                                            | 28   | 5                           | 5    | 41                        | 65   | 160      | 142   | 50           | 93    | 79                          | 66   | 209                        | 213  | 20                                            | 10   | 126                          | 136  | 23                                    | 19   | 13        | 25   | 76                      | 69   | 24                                            |
| Peru                        | 1,516              | 1,814 | 124                | 157  | 208                          | 306  | 11      | 6     | 268                                           | 272  | 6                           | 6    | 47                        | 67   | 119      | 184   | 152          | 221   | 102                         | 116  | 218                        | 228  | 19                                            | 7    | 122                          | 130  | 15                                    | 20   | 15        | 36   | 66                      | 57   | 23                                            |
| Philippines                 | 2,310              | 2,915 | 292                | 338  | 294                          | 380  | 2       | 3     | 152                                           | 144  | 27                          | 37   | 107                       | 135  | 179      | 368   | 397          | 528   | 229                         | 302  | 256                        | 266  | 12                                            | 14   | 127                          | 147  | 18                                    | 47   | 25        | 56   | 174                     | 149  | 18                                            |
| Saint Lucia                 | 1,084              | 1,154 | 116                | 156  | 74                           | 135  | 0       | 0     | 170                                           | 90   | 3                           | 8    | 50                        | 80   | 94       | 77    | 30           | 59    | 81                          | 49   | 191                        | 206  | 22                                            | 15   | 109                          | 119  | 26                                    | 53   | 12        | 22   | 99                      | 84   | 8                                             |
| Samoa                       | 2,082              | 2,173 | 203                | 252  | 410                          | 438  | 0       | 0     | 15                                            | 26   | 57                          | 43   | 80                        | 101  | 239      | 140   | 176          | 115   | 112                         | 154  | 317                        | 334  | 18                                            | 8    | 103                          | 112  | 44                                    | 75   | 38        | 87   | 259                     | 287  | 12                                            |
| South Africa                | 12,815             | 7,137 | 359                | 347  | 325                          | 418  | 33      | 18    | 49                                            | 55   | 19                          | 17   | 103                       | 138  | 10,253   | 4,688 | 957          | 815   | 236                         | 128  | 126                        | 136  | 35                                            | 25   | 110                          | 131  | 60                                    | 81   | 16        | 39   | 111                     | 100  | 25                                            |
| St Vincent & the Grenadines | 1,332              | 1,422 | 105                | 136  | 110                          | 136  | 0       | 0     | 128                                           | 123  | 4                           | 3    | 42                        | 78   | 360      | 306   | 26           | 56    | 80                          | 40   | 195                        | 206  | 17                                            | 20   | 112                          | 121  | 29                                    | 68   | 13        | 21   | 103                     | 109  | 9                                             |
| Suriname                    | 1,884              | 1,582 | 115                | 158  | 122                          | 144  | 12      | 8     | 178                                           | 163  | 5                           | 7    | 66                        | 94   | 533      | 243   | 37           | 45    | 314                         | 191  | 202                        | 219  | 20                                            | 14   | 109                          | 117  | 34                                    | 70   | 19        | 29   | 95                      | 80   | 23                                            |
| Syrian Arab Republic        | 1,003              | 997   | 175                | 173  | 179                          | 230  | 0       | 0     | 6                                             | 8    | 9                           | 9    | 82                        | 83   | 4        | 7     | 18           | 14    | 193                         | 134  | 94                         | 96   | 11                                            | 9    | 113                          | 124  | 26                                    | 14   | 26        | 44   | 57                      | 52   | 8                                             |
| Thailand                    | 1,485              | 1,792 | 190                | 220  | 144                          | 225  | 2       | 1     | 102                                           | 88   | 7                           | 9    | 63                        | 90   | 385      | 473   | 43           | 43    | 59                          | 59   | 251                        | 260  | 11                                            | 14   | 143                          | 162  | 20                                    | 57   | 17        | 53   | 42                      | 37   | 6                                             |
| Tokelau                     | 2,001              | 1,830 | 197                | 238  | 435                          | 319  | 0       | 0     | 20                                            | 38   | 24                          | 19   | 83                        | 85   | 158      | 164   | 143          | 56    | 136                         | 95   | 319                        | 336  | 19                                            | 8    | 100                          | 111  | 48                                    | 61   | 53        | 99   | 238                     | 201  | 28                                            |
| Tonga                       | 1,831              | 2,351 | 168                | 248  | 225                          | 354  | 0       | 0     | 57                                            | 57   | 18                          | 18   | 170                       | 263  | 50       | 49    | 86           | 73    | 278                         | 281  | 318                        | 340  | 19                                            | 8    | 103                          | 114  | 95                                    | 180  | 98        | 219  | 125                     | 148  | 23                                            |
| Tunisia                     | 641                | 662   | 152                | 151  | 73                           | 86   | 0       | 0     | 12                                            | 15   | 6                           | 5    | 28                        | 32   | 51       | 60    | 14           | 10    | 38                          | 27   | 94                         | 97   | 12                                            | 10   | 110                          | 119  | 16                                    | 12   | 19        | 30   | 9                       | 10   | 7                                             |
| Turkmenistan                | 1,428              | 1,603 | 169                | 166  | 269                          | 357  | 0       | 0     | 19                                            | 20   | 1                           | 2    | 123                       | 131  | 10       | 12    | 288          | 293   | 49                          | 30   | 78                         | 80   | 16                                            | 13   | 81                           | 93   | 20                                    | 15   | 119       | 276  | 171                     | 124  | 12                                            |
| Uzbekistan                  | 1,455              | 1,483 | 164                | 151  | 383                          | 449  | 0       | 0     | 23                                            | 30   | 1                           | 1    | 115                       | 137  | 20       | 20    | 171          | 141   | 95                          | 48   | 77                         | 81   | 14                                            | 14   | 81                           | 88   | 37                                    | 11   | 81        | 167  | 167                     | 145  | 24                                            |
| Viet Nam                    | 1,220              | 1,933 | 205                | 242  | 49                           | 166  | 7       | 7     | 124                                           | 125  | 10                          | 11   | 57                        | 120  | 63       | 414   | 147          | 200   | 135                         | 169  | 250                        | 261  | 8                                             | 15   | 95                           | 109  | 18                                    | 14   | 27        | 68   | 20                      | 12   | 5                                             |



15 to 24 years, DALYs/100,000, for males and females, 2019

|                              | Total communicable |       | Enteric infections |      | Lower respiratory infections |       | Malaria |      | Neonatal sepsis and other neonatal infections |      | Vaccine Preventable disease |      | Meningitis & Encephalitis |      | HIV/AIDS |      | Tuberculosis |      | Neglected Tropical diseases |      | Infectious skin conditions |      | Sexually transmitted infections excluding HIV |      | Upper respiratory infections |      | Other unspecified infectious diseases |      | Hepatitis |      | Rheumatic heart disease |      | Maternal sepsis and other maternal infections |
|------------------------------|--------------------|-------|--------------------|------|------------------------------|-------|---------|------|-----------------------------------------------|------|-----------------------------|------|---------------------------|------|----------|------|--------------|------|-----------------------------|------|----------------------------|------|-----------------------------------------------|------|------------------------------|------|---------------------------------------|------|-----------|------|-------------------------|------|-----------------------------------------------|
|                              | Female             | Male  | Female             | Male | Female                       | Male  | Female  | Male | Female                                        | Male | Female                      | Male | Female                    | Male | Female   | Male | Female       | Male | Female                      | Male | Female                     | Male | Female                                        | Male | Female                       | Male | Female                                | Male | Female    | Male | Female                  | Male |                                               |
| American Samoa               | 1,442              | 1,866 | 165                | 238  | 259                          | 297   | 0       | 0    | 5                                             | 11   | 18                          | 14   | 81                        | 101  | 24       | 22   | 38           | 23   | 117                         | 185  | 317                        | 392  | 18                                            | 8    | 96                           | 105  | 42                                    | 173  | 43        | 89   | 199                     | 208  | 19                                            |
| Antigua and Barbuda          | 952                | 1,152 | 84                 | 115  | 76                           | 133   | 0       | 0    | 11                                            | 78   | 5                           | 3    | 32                        | 54   | 145      | 197  | 17           | 14   | 138                         | 95   | 185                        | 205  | 16                                            | 15   | 106                          | 113  | 20                                    | 37   | 11        | 22   | 86                      | 70   | 21                                            |
| Argentina                    | 861                | 882   | 73                 | 94   | 174                          | 224   | 0       | 0    | 6                                             | 5    | 3                           | 3    | 38                        | 48   | 68       | 92   | 41           | 39   | 95                          | 35   | 173                        | 136  | 17                                            | 6    | 122                          | 114  | 13                                    | 15   | 14        | 23   | 54                      | 49   | 29                                            |
| Bahamas                      | 1,459              | 1,395 | 81                 | 110  | 121                          | 182   | 0       | 0    | 136                                           | 62   | 2                           | 5    | 47                        | 68   | 528      | 431  | 35           | 69   | 51                          | 23   | 190                        | 194  | 20                                            | 13   | 107                          | 111  | 28                                    | 25   | 17        | 28   | 87                      | 75   | 10                                            |
| Bahrain                      | 555                | 579   | 160                | 164  | 58                           | 75    | 0       | 0    | 5                                             | 5    | 3                           | 3    | 15                        | 31   | 8        | 13   | 22           | 15   | 18                          | 2    | 97                         | 105  | 10                                            | 10   | 102                          | 110  | 19                                    | 10   | 16        | 35   | 16                      | 12   | 5                                             |
| Barbados                     | 1,333              | 1,228 | 97                 | 125  | 94                           | 116   | 0       | 0    | 273                                           | 205  | 5                           | 5    | 61                        | 76   | 253      | 144  | 13           | 11   | 58                          | 49   | 206                        | 229  | 20                                            | 16   | 108                          | 115  | 17                                    | 49   | 13        | 18   | 92                      | 69   | 23                                            |
| Belarus                      | 591                | 606   | 180                | 152  | 31                           | 65    | 0       | 0    | 63                                            | 43   | 1                           | 1    | 45                        | 52   | 23       | 21   | 19           | 30   | 8                           | 6    | 61                         | 65   | 10                                            | 5    | 110                          | 119  | 10                                    | 8    | 16        | 29   | 6                       | 9    | 7                                             |
| Bosnia and Herzegovina       | 592                | 637   | 239                | 225  | 36                           | 58    | 0       | 0    | 20                                            | 22   | 5                           | 5    | 19                        | 26   | 2        | 2    | 7            | 15   | 10                          | 9    | 111                        | 115  | 10                                            | 6    | 104                          | 109  | 11                                    | 13   | 12        | 27   | 2                       | 5    | 4                                             |
| Bulgaria                     | 700                | 796   | 198                | 185  | 118                          | 192   | 0       | 0    | 19                                            | 18   | 1                           | 1    | 46                        | 55   | 22       | 27   | 6            | 7    | 8                           | 9    | 115                        | 118  | 10                                            | 5    | 101                          | 104  | 13                                    | 15   | 22        | 44   | 13                      | 16   | 7                                             |
| Chile                        | 539                | 542   | 81                 | 80   | 32                           | 37    | 0       | 0    | 4                                             | 9    | 3                           | 3    | 28                        | 32   | 18       | 67   | 18           | 16   | 11                          | 8    | 170                        | 130  | 13                                            | 4    | 122                          | 114  | 11                                    | 15   | 11        | 18   | 7                       | 8    | 8                                             |
| Cook Islands                 | 1,187              | 1,556 | 130                | 186  | 221                          | 446   | 0       | 0    | 27                                            | 51   | 6                           | 5    | 19                        | 25   | 143      | 151  | 26           | 20   | 110                         | 90   | 313                        | 324  | 19                                            | 7    | 93                           | 101  | 16                                    | 12   | 16        | 40   | 43                      | 98   | 5                                             |
| Croatia                      | 485                | 517   | 154                | 147  | 12                           | 24    | 0       | 0    | 48                                            | 69   | 1                           | 1    | 14                        | 14   | 2        | 6    | 4            | 3    | 8                           | 6    | 111                        | 115  | 10                                            | 5    | 100                          | 104  | 8                                     | 8    | 9         | 13   | 2                       | 3    | 3                                             |
| Dominica                     | 1,477              | 1,373 | 92                 | 120  | 127                          | 156   | 0       | 0    | 232                                           | 149  | 7                           | 8    | 67                        | 98   | 200      | 179  | 74           | 115  | 78                          | 43   | 209                        | 216  | 17                                            | 21   | 115                          | 119  | 32                                    | 42   | 20        | 21   | 127                     | 87   | 82                                            |
| Georgia                      | 859                | 1,040 | 234                | 214  | 97                           | 165   | 0       | 0    | 30                                            | 41   | 1                           | 1    | 38                        | 57   | 6        | 13   | 74           | 126  | 34                          | 24   | 77                         | 80   | 14                                            | 14   | 84                           | 96   | 15                                    | 14   | 18        | 56   | 119                     | 139  | 18                                            |
| Greece                       | 367                | 355   | 40                 | 43   | 34                           | 52    | 0       | 0    | 2                                             | 2    | 2                           | 2    | 15                        | 18   | 4        | 8    | 3            | 4    | 5                           | 6    | 127                        | 93   | 5                                             | 1    | 114                          | 108  | 6                                     | 6    | 8         | 11   | 2                       | 1    | 2                                             |
| Greenland                    | 553                | 508   | 82                 | 105  | 30                           | 23    | 0       | 0    | 2                                             | 3    | 6                           | 5    | 21                        | 35   | 27       | 25   | 8            | 8    | 9                           | 1    | 183                        | 161  | 14                                            | 3    | 133                          | 115  | 15                                    | 9    | 13        | 13   | 5                       | 2    | 5                                             |
| Hungary                      | 588                | 570   | 256                | 218  | 38                           | 49    | 0       | 0    | 15                                            | 22   | 1                           | 1    | 14                        | 16   | 2        | 3    | 2            | 2    | 8                           | 5    | 112                        | 115  | 10                                            | 5    | 101                          | 104  | 11                                    | 11   | 10        | 15   | 3                       | 3    | 4                                             |
| Israel                       | 340                | 343   | 42                 | 43   | 21                           | 36    | 0       | 0    | 2                                             | 3    | 2                           | 2    | 13                        | 15   | 6        | 12   | 2            | 3    | 3                           | 3    | 107                        | 94   | 5                                             | 1    | 113                          | 106  | 9                                     | 10   | 6         | 9    | 5                       | 6    | 5                                             |
| Italy                        | 355                | 323   | 25                 | 27   | 13                           | 18    | 0       | 0    | 6                                             | 6    | 2                           | 2    | 15                        | 17   | 11       | 12   | 2            | 2    | 4                           | 1    | 127                        | 94   | 7                                             | 2    | 121                          | 115  | 8                                     | 8    | 8         | 13   | 5                       | 7    | 1                                             |
| Jordan                       | 578                | 539   | 148                | 141  | 89                           | 80    | 0       | 0    | 18                                            | 23   | 8                           | 6    | 34                        | 36   | 7        | 6    | 4            | 3    | 33                          | 13   | 94                         | 98   | 9                                             | 8    | 86                           | 95   | 14                                    | 6    | 13        | 21   | 6                       | 4    | 15                                            |
| Kazakhstan                   | 826                | 822   | 161                | 144  | 111                          | 141   | 0       | 0    | 20                                            | 23   | 1                           | 1    | 60                        | 62   | 14       | 12   | 107          | 98   | 74                          | 50   | 77                         | 80   | 16                                            | 14   | 97                           | 108  | 25                                    | 14   | 30        | 55   | 20                      | 19   | 12                                            |
| Lebanon                      | 716                | 817   | 168                | 173  | 72                           | 119   | 0       | 0    | 14                                            | 17   | 28                          | 18   | 30                        | 37   | 44       | 31   | 15           | 15   | 14                          | 13   | 94                         | 97   | 9                                             | 10   | 107                          | 116  | 70                                    | 102  | 30        | 49   | 10                      | 20   | 10                                            |
| Libya                        | 878                | 807   | 189                | 185  | 106                          | 116   | 0       | 0    | 5                                             | 7    | 6                           | 5    | 29                        | 33   | 58       | 28   | 20           | 18   | 146                         | 88   | 94                         | 97   | 9                                             | 10   | 108                          | 118  | 26                                    | 15   | 27        | 39   | 53                      | 49   | 3                                             |
| Malaysia                     | 1,286              | 1,546 | 166                | 183  | 178                          | 283   | 4       | 2    | 52                                            | 75   | 7                           | 8    | 61                        | 85   | 90       | 93   | 83           | 76   | 175                         | 194  | 246                        | 254  | 10                                            | 15   | 102                          | 116  | 32                                    | 71   | 18        | 43   | 55                      | 48   | 6                                             |
| Malta                        | 381                | 361   | 31                 | 33   | 42                           | 49    | 0       | 0    | 4                                             | 4    | 2                           | 2    | 22                        | 24   | 6        | 8    | 2            | 3    | 6                           | 12   | 127                        | 95   | 5                                             | 1    | 113                          | 106  | 8                                     | 11   | 6         | 8    | 4                       | 4    | 3                                             |
| Mauritius                    | 1,241              | 1,603 | 70                 | 75   | 69                           | 150   | 0       | 0    | 61                                            | 217  | 2                           | 2    | 32                        | 69   | 68       | 119  | 17           | 11   | 462                         | 466  | 243                        | 249  | 10                                            | 13   | 104                          | 118  | 15                                    | 12   | 18        | 47   | 67                      | 56   | 7                                             |
| Montenegro                   | 556                | 551   | 172                | 148  | 51                           | 61    | 0       | 0    | 34                                            | 25   | 3                           | 3    | 17                        | 21   | 10       | 13   | 5            | 5    | 10                          | 15   | 111                        | 114  | 10                                            | 6    | 102                          | 106  | 9                                     | 9    | 14        | 18   | 5                       | 6    | 4                                             |
| Niue                         | 1,641              | 2,096 | 164                | 234  | 322                          | 492   | 0       | 0    | 27                                            | 41   | 8                           | 8    | 50                        | 79   | 139      | 145  | 76           | 56   | 185                         | 179  | 315                        | 337  | 18                                            | 7    | 97                           | 107  | 39                                    | 73   | 32        | 85   | 156                     | 252  | 12                                            |
| North Macedonia              | 661                | 624   | 248                | 190  | 50                           | 65    | 0       | 0    | 49                                            | 44   | 5                           | 5    | 22                        | 24   | 3        | 2    | 13           | 13   | 10                          | 9    | 111                        | 115  | 10                                            | 6    | 103                          | 107  | 11                                    | 9    | 16        | 22   | 5                       | 12   | 4                                             |
| Northern Mariana Islands     | 1,325              | 1,489 | 140                | 194  | 169                          | 285   | 0       | 0    | 8                                             | 20   | 10                          | 8    | 44                        | 60   | 62       | 34   | 60           | 26   | 162                         | 129  | 329                        | 342  | 20                                            | 7    | 93                           | 101  | 50                                    | 80   | 46        | 109  | 122                     | 92   | 9                                             |
| Oman                         | 758                | 747   | 182                | 166  | 123                          | 132   | 0       | 0    | 10                                            | 13   | 4                           | 4    | 64                        | 70   | 25       | 19   | 16           | 13   | 45                          | 27   | 99                         | 118  | 10                                            | 10   | 102                          | 110  | 36                                    | 27   | 31        | 37   | 4                       | 2    | 5                                             |
| Palau                        | 2,251              | 2,814 | 262                | 360  | 918                          | 1,262 | 0       | 0    | 27                                            | 44   | 7                           | 7    | 70                        | 21   | 127      | 145  | 83           | 52   | 163                         | 127  | 310                        | 321  | 18                                            | 8    | 97                           | 105  | 36                                    | 40   | 28        | 142  | 100                     | 178  | 6                                             |
| Poland                       | 494                | 535   | 135                | 125  | 63                           | 100   | 0       | 0    | 5                                             | 6    | 1                           | 1    | 18                        | 22   | 6        | 10   | 4            | 4    | 8                           | 7    | 109                        | 112  | 9                                             | 5    | 106                          | 109  | 11                                    | 12   | 10        | 17   | 4                       | 6    | 4                                             |
| Portugal                     | 433                | 436   | 34                 | 37   | 45                           | 65    | 0       | 0    | 3                                             | 5    | 2                           | 2    | 19                        | 25   | 44       | 50   | 6            | 7    | 12                          | 18   | 124                        | 91   | 5                                             | 2    | 111                          | 105  | 11                                    | 11   | 8         | 12   | 5                       | 4    | 2                                             |
| Republic of Moldova          | 997                | 1,090 | 198                | 176  | 71                           | 164   | 0       | 0    | 303                                           | 289  | 1                           | 1    | 40                        | 53   | 61       | 28   | 54           | 98   | 16                          | 6    | 73                         | 80   | 12                                            | 5    | 116                          | 126  | 18                                    | 9    | 14        | 32   | 14                      | 22   | 7                                             |
| Romania                      | 849                | 925   | 234                | 190  | 185                          | 278   | 0       | 0    | 18                                            | 8    | 1                           | 1    | 33                        | 36   | 57       | 74   | 43           | 46   | 10                          | 9    | 114                        | 113  | 10                                            | 5    | 100                          | 104  | 12                                    | 14   | 17        | 31   | 8                       | 11   | 8                                             |
| Russian Federation           | 926                | 933   | 232                | 196  | 99                           | 153   | 0       | 0    | 56                                            | 37   | 2                           | 1    | 36                        | 46   | 176      | 144  | 68           | 84   | 11                          | 10   | 80                         | 88   | 10                                            | 6    | 115                          | 125  | 8                                     | 8    | 17        | 29   | 7                       | 8    | 8                                             |
| Saint Kitts and Nevis        | 1,324              | 1,612 | 86                 | 128  | 89                           | 164   | 0       | 0    | 63                                            | 50   | 3                           | 4    | 56                        | 55   | 538      | 709  | 23           | 41   | 48                          | 29   | 186                        | 215  | 21                                            | 15   | 106                          | 118  | 23                                    | 40   | 13        | 21   | 26                      | 24   | 43                                            |
| Saudi Arabia                 | 811                | 654   | 146                | 129  | 180                          | 111   | 1       | 1    | 19                                            | 22   | 4                           | 4    | 36                        | 27   | 41       | 30   | 99           | 49   | 26                          | 22   | 94                         | 97   | 11                                            | 10   | 101                          | 109  | 8                                     | 6    | 22        | 29   | 19                      | 9    | 4                                             |
| Serbia                       | 503                | 549   | 163                | 173  | 32                           | 55    | 0       | 0    | 18                                            | 16   | 3                           | 3    | 20                        | 22   | 4        | 11   | 6            | 4    | 9                           | 8    | 111                        | 116  | 10                                            | 6    | 103                          | 107  | 9                                     | 10   | 12        | 16   | 1                       | 2    | 3                                             |
| Seychelles                   | 1,393              | 1,868 | 203                | 222  | 257                          | 417   | 0       | 0    | 149                                           | 213  | 10                          | 10   | 47                        | 98   | 101      | 49   | 32           | 30   | 125                         | 132  | 244                        | 251  | 13                                            | 16   | 102                          | 115  | 31                                    | 210  | 19        | 51   | 51                      | 53   | 8                                             |
| Spain                        | 371                | 338   | 39                 | 42   | 17                           | 22    | 0       | 0    | 7                                             | 7    | 3                           | 2    | 20                        | 19   | 12       | 16   | 3            | 2    | 5                           | 3    | 127                        | 92   | 4                                             | 2    | 112                          | 106  | 10                                    | 9    | 7         | 11   | 3                       | 3    | 2                                             |
| Sri Lanka                    | 1,107              | 1,284 | 222                | 237  | 111                          | 169   | 0       | 0    | 100                                           | 120  | 6                           | 6    | 64                        | 82   | 7        | 12   | 48           | 40   | 122                         | 127  | 241                        | 245  | 14                                            | 14   | 106                          | 122  | 28                                    | 55   | 15        | 40   | 17                      | 15   | 5                                             |
| Trinidad and Tobago          | 1,206              | 1,272 | 68                 | 97   | 90                           | 153   | 0       | 0    | 84                                            | 95   | 2                           | 2    | 45                        | 73   | 390      | 292  | 9            | 14   | 65                          | 61   | 183                        | 203  | 16                                            | 12   | 105                          | 111  | 38                                    | 54   | 15        | 21   | 90                      | 83   | 7                                             |
| Turkey                       | 630                | 629   | 158                | 157  | 64                           | 84    | 0       | 0    | 48                                            | 35   | 5                           | 5    | 20                        | 22   | 9        | 11   | 20           | 20   | 20                          | 5    | 94                         | 97   | 8                                             | 9    | 129                          | 135  | 27                                    | 26   | 13        | 22   | 4                       | 3    | 9                                             |
| Ukraine                      | 890                | 1,190 | 165                | 161  | 113                          | 255   | 0       | 0    | 40                                            | 42   | 2                           | 1    | 65                        | 91   | 110      | 63   | 131          | 250  | 11                          | 13   | 64                         | 71   | 11                                            | 5    | 119                          | 132  | 7                                     | 9    | 32        | 76   | 12                      | 21   | 8                                             |
| United States Virgin Islands | 747                | 793   | 89                 | 113  | 23                           | 52    | 0       | 0    | 64                                            | 51   | 6                           | 6    | 18                        | 26   | 142      | 108  | 12           | 15   | 40                          | 34   | 183                        | 203  | 17                                            | 17   | 103                          | 108  | 20                                    | 25   | 11        | 17   | 13                      | 18   | 6                                             |
| Uruguay                      | 611                | 625   | 54                 | 68   | 78                           | 82    | 0       | 0    | 11                                            | 19   | 2                           | 2    | 34                        | 26   | 51       | 116  | 19           | 21   | 9                           | 8    | 171                        | 133  | 15                                            | 5    | 122                          | 114  | 9                                     | 9    | 11        | 15   | 9                       | 9    | 16                                            |

15 to 24 years, DALYs/100,000, for males and females, 2019

|                            | Total communicable |       | Enteric infections |      | Lower respiratory infections |      | Malaria |      | Neonatal sepsis and other neonatal infections |      | Vaccine Preventable disease |      | Meningitis & Encephalitis |      | HIV/AIDS |      | Tuberculosis |      | Neglected Tropical diseases |      | Infectious skin conditions |      | Sexually transmitted infections excluding HIV |      | Upper respiratory infections |      | Other unspecified infectious diseases |      | Hepatitis |      | Rheumatic heart disease |      | Maternal sepsis and other maternal infections |      |  |
|----------------------------|--------------------|-------|--------------------|------|------------------------------|------|---------|------|-----------------------------------------------|------|-----------------------------|------|---------------------------|------|----------|------|--------------|------|-----------------------------|------|----------------------------|------|-----------------------------------------------|------|------------------------------|------|---------------------------------------|------|-----------|------|-------------------------|------|-----------------------------------------------|------|--|
|                            | Female             | Male  | Female             | Male | Female                       | Male | Female  | Male | Female                                        | Male | Female                      | Male | Female                    | Male | Female   | Male | Female       | Male | Female                      | Male | Female                     | Male | Female                                        | Male | Female                       | Male | Female                                | Male | Female    | Male | Female                  | Male | Female                                        | Male |  |
|                            |                    |       |                    |      |                              |      |         |      |                                               |      |                             |      |                           |      |          |      |              |      |                             |      |                            |      |                                               |      |                              |      |                                       |      |           |      |                         |      |                                               |      |  |
| Andorra                    | 411                | 388   | 37                 | 40   | 22                           | 19   | 0       | 0    | 3                                             | 3    | 3                           | 3    | 18                        | 13   | 47       | 81   | 2            | 1    | 2                           | 1    | 127                        | 93   | 5                                             | 2    | 110                          | 104  | 12                                    | 8    | 20        | 17   | 3                       | 1    | 1                                             |      |  |
| Australia                  | 426                | 366   | 37                 | 43   | 14                           | 13   | 0       | 0    | 2                                             | 2    | 2                           | 2    | 14                        | 15   | 4        | 4    | 2            | 2    | 5                           | 3    | 186                        | 148  | 14                                            | 3    | 116                          | 105  | 14                                    | 10   | 8         | 11   | 6                       | 6    | 2                                             |      |  |
| Austria                    | 347                | 318   | 40                 | 41   | 12                           | 14   | 0       | 0    | 3                                             | 3    | 2                           | 2    | 15                        | 17   | 6        | 14   | 2            | 3    | 4                           | 3    | 128                        | 95   | 5                                             | 1    | 109                          | 104  | 9                                     | 10   | 6         | 8    | 3                       | 3    | 3                                             |      |  |
| Belgium                    | 378                | 338   | 51                 | 52   | 22                           | 23   | 0       | 0    | 5                                             | 3    | 2                           | 2    | 22                        | 23   | 10       | 11   | 2            | 3    | 1                           | 1    | 126                        | 93   | 4                                             | 1    | 111                          | 105  | 11                                    | 12   | 7         | 8    | 2                       | 2    | 2                                             |      |  |
| Bermuda                    | 666                | 734   | 71                 | 101  | 28                           | 45   | 0       | 0    | 20                                            | 3    | 2                           | 2    | 31                        | 23   | 142      | 186  | 13           | 4    | 28                          | 20   | 181                        | 190  | 15                                            | 12   | 103                          | 108  | 14                                    | 12   | 9         | 14   | 9                       | 15   | 2                                             |      |  |
| Brunei Darussalam          | 741                | 680   | 11                 | 10   | 149                          | 127  | 0       | 0    | 6                                             | 7    | 5                           | 4    | 37                        | 35   | 26       | 53   | 70           | 33   | 49                          | 86   | 170                        | 131  | 17                                            | 3    | 118                          | 109  | 38                                    | 39   | 28        | 34   | 15                      | 9    | 2                                             |      |  |
| Canada                     | 521                | 480   | 72                 | 118  | 20                           | 23   | 0       | 0    | 9                                             | 7    | 2                           | 2    | 14                        | 13   | 14       | 11   | 2            | 2    | 3                           | 0    | 214                        | 161  | 13                                            | 2    | 135                          | 118  | 13                                    | 10   | 7         | 9    | 3                       | 3    | 1                                             |      |  |
| Cyprus                     | 343                | 307   | 48                 | 50   | 7                            | 15   | 0       | 0    | 2                                             | 2    | 3                           | 3    | 6                         | 9    | 15       | 8    | 1            | 2    | 1                           | 2    | 126                        | 93   | 5                                             | 2    | 113                          | 106  | 8                                     | 6    | 6         | 7    | 1                       | 3    | 1                                             |      |  |
| Czechia                    | 535                | 559   | 193                | 170  | 51                           | 80   | 0       | 0    | 24                                            | 24   | 1                           | 1    | 15                        | 23   | 4        | 4    | 2            | 2    | 3                           | 4    | 111                        | 116  | 9                                             | 5    | 98                           | 103  | 9                                     | 11   | 9         | 14   | 2                       | 2    | 3                                             |      |  |
| Denmark                    | 368                | 317   | 48                 | 52   | 13                           | 15   | 0       | 0    | 2                                             | 2    | 2                           | 2    | 18                        | 20   | 9        | 6    | 1            | 2    | 2                           | 1    | 138                        | 95   | 5                                             | 1    | 111                          | 105  | 9                                     | 9    | 6         | 7    | 1                       | 1    | 2                                             |      |  |
| Estonia                    | 633                | 638   | 245                | 172  | 54                           | 77   | 0       | 0    | 12                                            | 14   | 1                           | 1    | 20                        | 23   | 81       | 116  | 14           | 15   | 8                           | 4    | 59                         | 65   | 10                                            | 5    | 105                          | 113  | 9                                     | 9    | 10        | 19   | 2                       | 4    | 4                                             |      |  |
| Finland                    | 332                | 310   | 37                 | 40   | 9                            | 11   | 0       | 0    | 3                                             | 3    | 2                           | 2    | 18                        | 16   | 1        | 2    | 1            | 2    | 2                           | 1    | 128                        | 109  | 5                                             | 1    | 110                          | 104  | 8                                     | 9    | 6         | 8    | 1                       | 1    | 2                                             |      |  |
| France                     | 341                | 309   | 31                 | 36   | 13                           | 15   | 0       | 0    | 4                                             | 5    | 3                           | 3    | 15                        | 16   | 7        | 8    | 2            | 2    | 1                           | 1    | 126                        | 93   | 5                                             | 1    | 112                          | 106  | 9                                     | 11   | 6         | 9    | 5                       | 3    | 3                                             |      |  |
| Germany                    | 392                | 342   | 47                 | 48   | 19                           | 26   | 0       | 0    | 3                                             | 3    | 2                           | 2    | 14                        | 15   | 6        | 9    | 2            | 3    | 3                           | 1    | 161                        | 109  | 5                                             | 2    | 110                          | 104  | 10                                    | 9    | 5         | 8    | 3                       | 3    | 3                                             |      |  |
| Guam                       | 1,277              | 1,432 | 164                | 208  | 210                          | 206  | 0       | 0    | 28                                            | 64   | 9                           | 8    | 46                        | 62   | 50       | 135  | 71           | 33   | 46                          | 18   | 324                        | 336  | 19                                            | 7    | 90                           | 98   | 32                                    | 28   | 38        | 105  | 143                     | 124  | 9                                             | 9    |  |
| Iceland                    | 372                | 328   | 48                 | 48   | 35                           | 31   | 0       | 0    | 3                                             | 2    | 2                           | 2    | 22                        | 23   | 2        | 8    | 2            | 2    | 1                           | 1    | 126                        | 92   | 5                                             | 1    | 111                          | 104  | 9                                     | 7    | 4         | 5    | 2                       | 2    | 2                                             |      |  |
| Ireland                    | 336                | 299   | 32                 | 34   | 16                           | 18   | 0       | 0    | 3                                             | 3    | 2                           | 2    | 18                        | 17   | 3        | 5    | 2            | 2    | 1                           | 1    | 126                        | 93   | 5                                             | 1    | 110                          | 103  | 9                                     | 11   | 6         | 8    | 2                       | 1    | 2                                             |      |  |
| Japan                      | 398                | 343   | 4                  | 5    | 23                           | 31   | 0       | 0    | 3                                             | 3    | 2                           | 2    | 13                        | 14   | 2        | 3    | 3            | 2    | 8                           | 2    | 169                        | 131  | 13                                            | 2    | 129                          | 121  | 17                                    | 11   | 9         | 14   | 2                       | 3    | 1                                             |      |  |
| Kuwait                     | 503                | 531   | 122                | 125  | 73                           | 112  | 0       | 0    | 5                                             | 6    | 2                           | 2    | 17                        | 20   | 1        | 1    | 17           | 8    | 23                          | 7    | 93                         | 98   | 9                                             | 9    | 102                          | 109  | 21                                    | 7    | 10        | 18   | 5                       | 10   | 3                                             |      |  |
| Latvia                     | 604                | 630   | 212                | 208  | 63                           | 91   | 0       | 0    | 16                                            | 16   | 1                           | 2    | 23                        | 30   | 52       | 32   | 17           | 21   | 7                           | 7    | 64                         | 72   | 10                                            | 5    | 107                          | 114  | 10                                    | 9    | 12        | 17   | 5                       | 7    | 5                                             |      |  |
| Lithuania                  | 607                | 584   | 234                | 188  | 65                           | 75   | 0       | 0    | 25                                            | 20   | 1                           | 1    | 24                        | 30   | 14       | 18   | 27           | 27   | 9                           | 5    | 66                         | 71   | 10                                            | 5    | 104                          | 112  | 10                                    | 8    | 10        | 18   | 4                       | 5    | 4                                             |      |  |
| Luxembourg                 | 375                | 342   | 50                 | 51   | 21                           | 27   | 0       | 0    | 2                                             | 2    | 2                           | 3    | 17                        | 17   | 8        | 10   | 2            | 2    | 2                           | 1    | 126                        | 93   | 5                                             | 2    | 109                          | 102  | 20                                    | 21   | 7         | 9    | 2                       | 3    | 2                                             |      |  |
| Monaco                     | 377                | 353   | 36                 | 39   | 38                           | 47   | 0       | 0    | 3                                             | 3    | 3                           | 3    | 10                        | 21   | 23       | 19   | 4            | 5    | 4                           | 2    | 127                        | 93   | 5                                             | 2    | 104                          | 98   | 7                                     | 6    | 8         | 13   | 2                       | 2    | 2                                             |      |  |
| Netherlands                | 334                | 314   | 31                 | 35   | 18                           | 16   | 0       | 0    | 9                                             | 13   | 2                           | 2    | 19                        | 19   | 7        | 5    | 2            | 2    | 1                           | 1    | 111                        | 94   | 5                                             | 2    | 111                          | 105  | 10                                    | 12   | 6         | 8    | 1                       | 1    | 2                                             |      |  |
| New Zealand                | 485                | 419   | 68                 | 60   | 11                           | 13   | 0       | 0    | 6                                             | 5    | 1                           | 1    | 24                        | 23   | 6        | 5    | 3            | 2    | 3                           | 1    | 186                        | 151  | 13                                            | 2    | 125                          | 115  | 11                                    | 10   | 8         | 13   | 14                      | 17   | 6                                             | 6    |  |
| Norway                     | 361                | 308   | 35                 | 42   | 11                           | 11   | 0       | 0    | 3                                             | 3    | 2                           | 2    | 18                        | 25   | 12       | 15   | 1            | 1    | 2                           | 1    | 130                        | 74   | 7                                             | 2    | 118                          | 113  | 14                                    | 11   | 6         | 8    | 1                       | 1    | 2                                             |      |  |
| Puerto Rico                | 817                | 870   | 74                 | 93   | 49                           | 76   | 0       | 0    | 150                                           | 132  | 2                           | 2    | 22                        | 22   | 60       | 79   | 4            | 3    | 117                         | 96   | 182                        | 193  | 14                                            | 13   | 105                          | 109  | 20                                    | 28   | 10        | 16   | 4                       | 7    | 5                                             |      |  |
| Qatar                      | 511                | 446   | 115                | 100  | 84                           | 43   | 0       | 0    | 3                                             | 3    | 4                           | 3    | 27                        | 19   | 3        | 6    | 21           | 8    | 9                           | 2    | 94                         | 97   | 10                                            | 11   | 99                           | 106  | 12                                    | 10   | 22        | 29   | 3                       | 9    | 5                                             |      |  |
| Republic of Korea          | 428                | 386   | 9                  | 9    | 16                           | 19   | 0       | 0    | 4                                             | 7    | 4                           | 3    | 17                        | 17   | 1        | 6    | 14           | 12   | 27                          | 33   | 167                        | 129  | 15                                            | 3    | 120                          | 111  | 16                                    | 11   | 15        | 24   | 2                       | 2    | 0                                             |      |  |
| San Marino                 | 410                | 349   | 37                 | 39   | 20                           | 21   | 0       | 0    | 3                                             | 3    | 3                           | 3    | 28                        | 25   | 22       | 18   | 2            | 1    | 13                          | 5    | 126                        | 93   | 5                                             | 2    | 112                          | 105  | 22                                    | 15   | 12        | 16   | 4                       | 3    | 1                                             |      |  |
| Singapore                  | 451                | 438   | 7                  | 7    | 60                           | 98   | 0       | 0    | 8                                             | 8    | 3                           | 2    | 19                        | 23   | 2        | 8    | 7            | 6    | 19                          | 14   | 168                        | 131  | 14                                            | 2    | 118                          | 109  | 14                                    | 12   | 10        | 15   | 3                       | 4    | 0                                             |      |  |
| Slovakia                   | 571                | 631   | 189                | 225  | 89                           | 109  | 0       | 0    | 10                                            | 10   | 3                           | 2    | 20                        | 19   | 2        | 2    | 3            | 2    | 7                           | 7    | 112                        | 116  | 10                                            | 6    | 98                           | 101  | 8                                     | 10   | 13        | 18   | 4                       | 3    | 4                                             |      |  |
| Slovenia                   | 487                | 472   | 170                | 157  | 20                           | 22   | 0       | 0    | 33                                            | 22   | 1                           | 1    | 13                        | 16   | 0        | 2    | 2            | 1    | 4                           | 4    | 111                        | 115  | 9                                             | 5    | 98                           | 101  | 9                                     | 11   | 9         | 13   | 3                       | 2    | 3                                             |      |  |
| Sweden                     | 358                | 311   | 39                 | 42   | 10                           | 15   | 0       | 0    | 4                                             | 4    | 2                           | 2    | 12                        | 13   | 2        | 4    | 2            | 2    | 1                           | 1    | 144                        | 99   | 6                                             | 1    | 119                          | 113  | 9                                     | 10   | 4         | 5    | 1                       | 1    | 2                                             |      |  |
| Switzerland                | 329                | 296   | 36                 | 38   | 9                            | 12   | 0       | 0    | 4                                             | 7    | 2                           | 2    | 10                        | 12   | 7        | 5    | 2            | 2    | 1                           | 0    | 126                        | 94   | 5                                             | 2    | 110                          | 103  | 9                                     | 10   | 5         | 9    | 1                       | 1    | 2                                             |      |  |
| Taiwan (Province of China) | 610                | 651   | 61                 | 63   | 36                           | 61   | 0       | 0    | 8                                             | 6    | 2                           | 2    | 14                        | 18   | 3        | 20   | 31           | 26   | 52                          | 45   | 283                        | 265  | 8                                             | 10   | 82                           | 89   | 13                                    | 9    | 13        | 33   | 4                       | 3    | 1                                             |      |  |
| United Arab Emirates       | 652                | 663   | 170                | 158  | 68                           | 106  | 0       | 0    | 4                                             | 5    | 7                           | 7    | 28                        | 41   | 32       | 21   | 28           | 25   | 24                          | 5    | 95                         | 99   | 10                                            | 10   | 100                          | 108  | 31                                    | 11   | 18        | 24   | 35                      | 44   | 3                                             |      |  |
| United Kingdom             | 388                | 351   | 34                 | 37   | 31                           | 38   | 0       | 0    | 3                                             | 3    | 3                           | 3    | 27                        | 29   | 9        | 9    | 4            | 3    | 2                           | 1    | 122                        | 91   | 8                                             | 1    | 119                          | 112  | 13                                    | 12   | 8         | 10   | 2                       | 2    | 4                                             |      |  |
| United States of America   | 532                | 501   | 88                 | 76   | 34                           | 38   | 0       | 0    | 6                                             | 7    | 2                           | 2    | 13                        | 15   | 21       | 30   | 2            | 2    | 6                           | 3    | 172                        | 171  | 12                                            | 3    | 141                          | 126  | 16                                    | 14   | 8         | 12   | 3                       | 3    | 6                                             |      |  |

**S14 (B)** Percentage change in DALYs/100,000 for each communicable condition for each location for 15-24 year age group by sex. The colours on this heat map are green for values less than 0, the darker the green the greater the reduction in DALYs/100,000 between 1990 and 2019, the orange tones represent positive numbers, an increase in DALYs/ 100,000, with darker shades indicating worse outcome.

|                             |                          | 15 to 24           |       |                    |       |                              |       |         |       |                                               |        |                             |       |                           |        |           |           |              |       |                             |       |                            |       |                                               |       |                              |       |                                       |       |           |       |                         |       |                                               |
|-----------------------------|--------------------------|--------------------|-------|--------------------|-------|------------------------------|-------|---------|-------|-----------------------------------------------|--------|-----------------------------|-------|---------------------------|--------|-----------|-----------|--------------|-------|-----------------------------|-------|----------------------------|-------|-----------------------------------------------|-------|------------------------------|-------|---------------------------------------|-------|-----------|-------|-------------------------|-------|-----------------------------------------------|
|                             |                          | Total communicable |       | Enteric infections |       | Lower respiratory infections |       | Malaria |       | Neonatal sepsis and other neonatal infections |        | Vaccine Preventable disease |       | Meningitis & Encephalitis |        | HIV/AIDS  |           | Tuberculosis |       | Neglected Tropical diseases |       | Infectious skin conditions |       | Sexually transmitted infections excluding HIV |       | Upper respiratory infections |       | Other unspecified infectious diseases |       | Hepatitis |       | Rheumatic heart disease |       | Maternal sepsis and other maternal infections |
|                             |                          | Female             | Male  | Female             | Male  | Female                       | Male  | Female  | Male  | Female                                        | Male   | Female                      | Male  | Female                    | Male   | Female    | Male      | Female       | Male  | Female                      | Male  | Female                     | Male  | Female                                        | Male  | Female                       | Male  | Female                                | Male  | Female    | Male  | Female                  |       |                                               |
| Low SDI                     | Afghanistan              | -1.7%              | -1.5% | -0.5%              | -0.6% | -1.6%                        | -1.4% | 1.3%    | 3.1%  | 45.4%                                         | 57.4%  | -3.1%                       | -3.1% | -1.2%                     | -1.2%  | 22.3%     | 14.7%     | -2.4%        | -2.3% | -0.9%                       | -1.3% | 0.0%                       | 0.0%  | -0.1%                                         | 0.0%  | 0.1%                         | 0.1%  | -1.4%                                 | -1.4% | -2.1%     | -2.1% | -1.9%                   | -1.6% | -2.2%                                         |
|                             | Benin                    | -1.0%              | -1.1% | -1.5%              | -1.6% | -0.8%                        | -1.0% | 1.5%    | 1.2%  | 45.4%                                         | 37.6%  | -2.6%                       | -2.7% | -1.3%                     | -1.5%  | 25.0%     | 112.0%    | -1.8%        | -2.0% | -2.5%                       | -2.7% | -0.0%                      | -0.1% | -1.7%                                         | 0.0%  | -0.1%                        | -0.2% | -0.3%                                 | -0.5% | -1.4%     | -2.1% | -1.2%                   | -1.1% | -2.3%                                         |
|                             | Burkina Faso             | -2.2%              | -1.5% | -1.6%              | -1.3% | -0.7%                        | -0.0% | -0.9%   | -0.9% | 49.1%                                         | 59.7%  | -3.0%                       | -2.9% | -1.6%                     | -1.1%  | -3.1%     | -1.8%     | -1.2%        | -1.3% | -2.9%                       | -3.0% | 0.0%                       | -0.0% | -1.7%                                         | -0.1% | -0.1%                        | -0.3% | 0.4%                                  | 0.0%  | -1.2%     | -1.7% | -0.5%                   | -0.5% | -2.1%                                         |
|                             | Burundi                  | -2.1%              | -1.7% | -1.9%              | -1.4% | -1.4%                        | -1.4% | -1.8%   | -2.2% | 50.8%                                         | 68.4%  | -3.0%                       | -2.8% | -1.4%                     | -1.3%  | -3.0%     | -0.1%     | -1.8%        | -1.9% | -2.0%                       | -2.0% | -0.0%                      | -0.1% | -1.2%                                         | -1.7% | -0.1%                        | -0.2% | -1.9%                                 | -2.3% | -1.2%     | -1.3% | -1.3%                   | -1.4% | -1.1%                                         |
|                             | Central African Republic | -1.2%              | -0.8% | -0.7%              | -0.5% | -0.5%                        | -0.7% | 1.1%    | 1.6%  | 23.3%                                         | 23.5%  | -2.2%                       | -2.3% | -0.8%                     | -1.0%  | -1.6%     | 5.5%      | -0.3%        | -0.6% | -2.6%                       | -2.7% | 0.0%                       | -0.1% | -0.7%                                         | -1.4% | -0.0%                        | -0.1% | 0.3%                                  | -0.4% | -0.8%     | -1.6% | -0.7%                   | -0.9% | 0.0%                                          |
|                             | Chad                     | -1.1%              | -0.9% | -1.2%              | -1.1% | -0.6%                        | -0.3% | -1.0%   | -0.7% | 38.1%                                         | 45.4%  | -2.8%                       | -2.6% | -0.7%                     | -0.3%  | 0.6%      | 12.9%     | -1.2%        | -0.9% | -1.6%                       | -2.1% | 0.0%                       | 0.1%  | -1.6%                                         | -0.0% | -0.1%                        | -0.3% | -0.1%                                 | -0.6% | -0.7%     | -1.1% | -1.1%                   | -0.8% | -1.5%                                         |
|                             | Côte d'Ivoire            | -1.8%              | -1.0% | -1.4%              | -1.5% | -0.8%                        | -1.1% | -0.5%   | -0.2% | 26.4%                                         | 46.7%  | -3.1%                       | -3.0% | -1.3%                     | -1.4%  | -2.3%     | 4.5%      | -1.4%        | -1.7% | -2.7%                       | -2.5% | 0.0%                       | 0.1%  | -1.7%                                         | 0.0%  | 0.0%                         | -0.1% | -0.3%                                 | -0.6% | -1.4%     | -2.0% | -1.2%                   | -1.1% | -1.8%                                         |
|                             | Dem Rep of the Congo     | -1.7%              | -1.4% | -1.3%              | -0.9% | -1.2%                        | -0.9% | -1.1%   | -1.0% | 46.3%                                         | 44.5%  | -1.9%                       | -1.6% | -1.2%                     | -0.9%  | -2.7%     | -0.2%     | -1.3%        | -1.4% | -1.9%                       | -2.2% | -0.0%                      | -0.1% | -1.0%                                         | -0.8% | 0.0%                         | 0.1%  | -0.5%                                 | -0.5% | -1.1%     | -1.5% | -1.0%                   | -0.7% | -0.1%                                         |
|                             | Eritrea                  | -1.9%              | -1.7% | -2.5%              | -1.8% | -1.1%                        | -0.8% | -2.3%   | -2.5% | 31.8%                                         | 103.8% | -3.2%                       | -3.1% | -1.0%                     | -0.8%  | -1.2%     | 11.9%     | -1.9%        | -1.7% | -2.2%                       | -2.7% | -0.0%                      | -0.1% | -0.8%                                         | -1.9% | -0.3%                        | -0.4% | -1.7%                                 | -2.2% | -1.1%     | -0.7% | -1.0%                   | -1.2% | -2.0%                                         |
|                             | Ethiopia                 | -2.3%              | -2.2% | -2.6%              | -2.2% | -2.4%                        | -2.2% | -0.7%   | 2.5%  | 38.9%                                         | 105.6% | -3.1%                       | -3.1% | -2.4%                     | -2.3%  | -1.4%     | 10.4%     | -2.8%        | -2.6% | -2.2%                       | -2.7% | -0.1%                      | -0.2% | -2.0%                                         | -2.2% | -0.6%                        | -0.7% | -1.0%                                 | -1.2% | -2.0%     | -1.4% | -1.6%                   | -1.6% | -2.7%                                         |
|                             | Gambia                   | -1.1%              | -1.3% | -1.5%              | -1.3% | -0.6%                        | 0.1%  | -2.5%   | -2.4% | 18.1%                                         | 34.2%  | -3.0%                       | -2.9% | -1.4%                     | -0.8%  | 23.0%     | 84.1%     | -1.4%        | -0.9% | -1.6%                       | -2.0% | 0.0%                       | 0.2%  | -1.3%                                         | 0.1%  | 0.0%                         | -0.1% | 1.2%                                  | -0.3% | -1.2%     | -0.5% | -1.0%                   | -0.6% | -1.7%                                         |
|                             | Guinea                   | -0.8%              | -0.7% | -1.6%              | -1.3% | -0.5%                        | 0.3%  | 0.4%    | 0.8%  | 63.5%                                         | 60.0%  | -2.9%                       | -2.8% | -0.9%                     | -0.3%  | 10.5%     | 44.0%     | -1.6%        | -1.2% | -1.5%                       | -1.6% | -0.0%                      | 0.0%  | -1.7%                                         | 0.0%  | -0.0%                        | -0.1% | -0.2%                                 | -0.7% | -1.0%     | -0.9% | -1.3%                   | -0.7% | -1.7%                                         |
|                             | Guinea-Bissau            | -1.3%              | -1.4% | -1.9%              | -1.7% | -1.2%                        | -1.0% | -2.2%   | -1.8% | 70.6%                                         | 107.3% | -2.5%                       | -2.6% | -1.5%                     | -1.5%  | 11.2%     | 84.9%     | -2.0%        | -1.8% | -1.5%                       | -2.4% | -0.1%                      | -0.1% | -1.9%                                         | -0.1% | -0.1%                        | -0.2% | 0.6%                                  | -0.6% | -1.4%     | -1.8% | -1.6%                   | -1.5% | -2.4%                                         |
|                             | Haiti                    | -1.6%              | -1.3% | -1.7%              | -1.3% | -1.6%                        | -1.4% | -1.2%   | -1.4% | 53.8%                                         | 74.1%  | -2.5%                       | -2.6% | -1.9%                     | -1.8%  | -1.7%     | 2.2%      | -2.0%        | -2.5% | -1.3%                       | -2.9% | 0.0%                       | 0.0%  | -0.5%                                         | -1.2% | -0.1%                        | -0.0% | -0.3%                                 | -0.4% | -2.0%     | -1.4% | -1.8%                   | -1.4% | -1.0%                                         |
|                             | Liberia                  | -0.9%              | -1.2% | -1.3%              | -1.3% | -1.1%                        | -1.0% | 1.0%    | 0.3%  | 101.4%                                        | 120.6% | -3.0%                       | -3.0% | -1.7%                     | -1.5%  | 3.8%      | 22.9%     | -2.0%        | -2.0% | -1.5%                       | -1.9% | -0.1%                      | -0.2% | -1.5%                                         | 0.1%  | 0.1%                         | 0.1%  | -0.7%                                 | -0.7% | -1.1%     | -1.5% | -1.3%                   | -0.8% | -1.5%                                         |
|                             | Madagascar               | -1.6%              | -1.6% | -1.7%              | -0.8% | -1.7%                        | -1.7% | -1.7%   | -1.2% | 44.7%                                         | 59.5%  | -2.5%                       | -2.6% | -1.7%                     | -1.5%  | 1,193.1%  | 2,481.2%  | -2.1%        | -2.1% | -1.7%                       | -2.6% | -0.1%                      | -0.1% | -1.4%                                         | -1.6% | -0.2%                        | -0.2% | -0.8%                                 | -1.3% | -1.7%     | -1.8% | -1.5%                   | -1.2% | -1.8%                                         |
|                             | Malawi                   | -2.3%              | -1.5% | -1.8%              | -1.2% | -1.9%                        | -0.7% | -2.1%   | -1.9% | 74.5%                                         | 74.7%  | -2.9%                       | -2.4% | -2.1%                     | -1.0%  | -2.5%     | -0.7%     | -2.1%        | -1.5% | -2.8%                       | -2.9% | 0.0%                       | 0.0%  | -1.4%                                         | -1.3% | -0.2%                        | -0.2% | -0.2%                                 | -0.5% | -2.0%     | -1.7% | -1.2%                   | -0.7% | -1.8%                                         |
|                             | Mali                     | -1.8%              | -1.6% | -1.9%              | -0.9% | -1.5%                        | -1.1% | -2.0%   | -1.8% | 90.3%                                         | 69.9%  | -3.0%                       | -2.9% | -1.9%                     | -1.4%  | 1.3%      | 13.7%     | -1.1%        | -1.8% | -2.4%                       | -2.8% | -0.1%                      | -0.0% | -2.0%                                         | -0.0% | -0.2%                        | -0.3% | -0.5%                                 | -0.3% | -2.0%     | -2.2% | -1.8%                   | -1.1% | -2.4%                                         |
|                             | Mozambique               | 1.5%               | 0.3%  | -2.2%              | -1.2% | -0.9%                        | 1.0%  | -1.8%   | -1.6% | 50.8%                                         | 62.4%  | -3.1%                       | -3.0% | -1.6%                     | -0.4%  | 24.0%     | 55.1%     | -1.7%        | -0.7% | -2.2%                       | -2.4% | -0.0%                      | 0.0%  | -1.1%                                         | -1.3% | -0.6%                        | -0.5% | -0.5%                                 | -0.7% | -1.4%     | -1.1% | -0.6%                   | -0.3% | -2.6%                                         |
|                             | Nepal                    | -2.3%              | -2.1% | -2.2%              | -2.1% | -2.2%                        | -1.7% | -3.1%   | -3.0% | 140.5%                                        | 117.3% | -3.1%                       | -3.0% | -1.6%                     | -1.3%  | 66,683.1% | 52,995.2% | -2.9%        | -2.6% | -2.3%                       | -2.7% | 0.0%                       | -0.0% | -1.7%                                         | -0.2% | -0.3%                        | -0.3% | -0.8%                                 | -0.7% | -2.3%     | -1.5% | -3.1%                   | -1.4% | -3.2%                                         |
| Niger                       | -1.6%                    | -1.5%              | -1.8% | -1.4%              | -1.2% | -1.0%                        | -1.2% | -0.8%   | 77.6% | 81.0%                                         | -2.4%  | -2.4%                       | -1.5% | -1.5%                     | -0.7%  | 5.6%      | -2.0%     | -1.9%        | -2.1% | -2.6%                       | -0.1% | -0.1%                      | -1.7% | -0.1%                                         | 0.0%  | -0.1%                        | -1.1% | -1.1%                                 | -1.3% | -1.5%     | -1.3% | -1.1%                   | -1.4% |                                               |
| Pakistan                    | -1.6%                    | -1.2%              | -1.3% | -1.5%              | -0.0% | 0.1%                         | -2.7% | -2.7%   | 24.8% | 19.4%                                         | -3.1%  | -3.1%                       | -1.0% | -0.7%                     | 36.4%  | 24.4%     | -1.6%     | -1.2%        | -2.5% | -2.2%                       | -0.0% | -0.0%                      | -0.3% | 0.2%                                          | 0.1%  | 0.0%                         | 0.2%  | -0.7%                                 | -1.2% | -0.7%     | -0.5% | 0.0%                    | -2.4% |                                               |
| Papua New Guinea            | -0.8%                    | -1.0%              | -1.6% | -1.5%              | -0.7% | -0.6%                        | -1.7% | -1.6%   | 11.2% | 14.8%                                         | -2.3%  | -2.4%                       | -1.5% | -1.3%                     | 963.3% | 2,508.6%  | -1.6%     | -1.6%        | -1.6% | -1.1%                       | -0.0% | -0.0%                      | -0.2% | 0.0%                                          | -0.1% | -0.1%                        | -0.3% | 0.4%                                  | -1.7% | -1.6%     | -0.0% | -0.0%                   | -1.9% |                                               |
| Rwanda                      | -2.4%                    | -2.2%              | -2.5% | -2.0%              | -2.1% | -1.9%                        | -2.6% | -2.7%   | 88.5% | 99.3%                                         | -3.1%  | -3.0%                       | -2.2% | -1.9%                     | -2.0%  | 3.0%      | -2.7%     | -2.6%        | -2.4% | -2.0%                       | -0.2% | -0.3%                      | -1.7% | -1.8%                                         | -0.3% | -0.4%                        | -1.6% | -2.2%                                 | -1.9% | -2.1%     | -1.8% | -1.8%                   | -2.7% |                                               |
| Senegal                     | -1.6%                    | -1.5%              | -1.9% | -1.6%              | -1.3% | -0.9%                        | -1.6% | -1.5%   | 34.9% | 46.6%                                         | -2.9%  | -2.8%                       | -1.6% | -1.2%                     | 1.4%   | 20.2%     | -2.1%     | -1.9%        | -1.5% | -2.3%                       | -0.1% | 0.0%                       | -1.7% | 0.1%                                          | -0.1% | -0.2%                        | 0.1%  | -0.9%                                 | -1.7% | -1.6%     | -1.2% | -0.9%                   | -2.1% |                                               |
| Sierra Leone                | -0.4%                    | -1.2%              | -1.1% | -0.8%              | 0.3%  | -0.6%                        | -0.3% | -1.1%   | 41.6% | 44.5%                                         | -2.9%  | -2.8%                       | -0.9% | -1.2%                     | 13.4%  | 32.7%     | -1.2%     | -1.8%        | -2.3% | -2.5%                       | -0.0% | 0.0%                       | -1.3% | -0.0%                                         | -0.0% | -0.1%                        | -0.5% | -0.9%                                 | -0.9% | -2.0%     | -0.9% | -1.0%                   | -0.7% |                                               |
| Solomon Islands             | -1.0%                    | -1.3%              | -1.5% | -1.6%              | -1.2% | -1.4%                        | -2.0% | -1.9%   | 3.8%  | 7.4%                                          | -2.9%  | -2.9%                       | -1.3% | -1.5%                     | 22.2%  | 20.3%     | -1.3%     | -1.6%        | -0.4% | -0.4%                       | -0.0% | -0.0%                      | -0.1% | -0.1%                                         | -0.1% | -0.1%                        | -0.3% | -0.6%                                 | -1.5% | -1.9%     | -0.6% | -0.7%                   | -1.1% |                                               |
| Somalia                     | -1.3%                    | -1.3%              | -1.6% | -1.2%              | -0.8% | -0.1%                        | -1.8% | -1.7%   | 29.1% | 27.2%                                         | -2.3%  | -1.8%                       | -0.0% | 0.9%                      | 78.9%  | 413.0%    | -0.7%     | 0.1%         | -2.6% | -3.0%                       | -0.1% | -0.1%                      | -0.6% | -1.2%                                         | 0.1%  | 0.2%                         | -1.6% | -1.7%                                 | -0.7% | 0.1%      | -0.9% | -0.7%                   | 0.2%  |                                               |
| South Sudan                 | -0.8%                    | -1.2%              | -0.9% | -0.2%              | -1.2% | -0.6%                        | -1.1% | -0.1%   | 41.5% | 42.6%                                         | -2.6%  | -2.3%                       | -0.4% | 0.3%                      | 15.6%  | 48.7%     | -1.3%     | -1.0%        | -1.6% | -2.2%                       | 0.0%  | 0.1%                       | -0.8% | -1.3%                                         | -0.1% | -0.1%                        | -1.8% | -1.6%                                 | -0.5% | 0.2%      | -0.9% | -0.6%                   | -1.0% |                                               |
| Togo                        | -0.8%                    | -0.5%              | -1.3% | -1.2%              | -1.1% | -0.3%                        | -0.2% | 0.1%    | 36.2% | 39.3%                                         | -3.0%  | -2.8%                       | -1.6% | -1.0%                     | 3.3%   | 42.1%     | -1.8%     | -1.4%        | -2.4% | -2.5%                       | 0.0%  | 0.0%                       | -1.8% | -0.0%                                         | -0.0% | -0.1%                        | -0.2% | -0.8%                                 | -1.6% | -1.8%     | -1.4% | -0.7%                   | -2.1% |                                               |
| Uganda                      | -2.5%                    | -1.7%              | -1.2% | -0.9%              | 0.0%  | 0.0%                         | -1.6% | -1.7%   | 52.9% | 54.7%                                         | -2.6%  | -2.6%                       | -0.6% | -0.4%                     | -2.9%  | -0.8%     | -1.1%     | -1.4%        | -3.0% | -3.1%                       | 0.0%  | 0.0%                       | -0.4% | -0.9%                                         | -0.3% | -0.3%                        | -1.5% | -1.8%                                 | -0.3% | -0.3%     | -0.2% | -0.4%                   | -1.5% |                                               |
| United Republic of Tanzania | -2.3%                    | -1.8%              | -1.7% | -1.8%              | -1.3% | -1.2%                        | -2.0% | -2.2%   | 46.4% | 45.4%                                         | -2.8%  | -2.8%                       | -0.8% | -0.7%                     | -2.7%  | -1.6%     | -1.7%     | -1.8%        | -2.4% | -2.7%                       | -0.3% | -0.3%                      | -1.0% | -1.1%                                         | -0.3% | -0.3%                        | -0.6% | -0.6%                                 | -1.3% | -1.3%     | -0.7% | -1.0%                   | -2.1% |                                               |
| Yemen                       | -1.9%                    | -2.1%              | 0.7%  | 0.2%               | -0.4% | 0.2%                         | -2.2% | -2.3%   | 23.5% | 29.7%                                         | -3.0%  | -3.0%                       | -0.6% | -0.5%                     | 12.6%  | 8.7%      | -2.1%     | -1.9%        | -1.9% | -2.4%                       | 0.0%  | -0.0%                      | -0.1% | 0.0%                                          | 0.0%  | 0.1%                         | 2.3%  | 0.1%                                  | -1.8% | -2.2%     | -1.0% | -0.7%                   | -1.7% |                                               |

|                                       | Total communicable |       | Enteric infections |       | Lower respiratory infections |       | Malaria |        | Neonatal sepsis and other neonatal infections |        | Vaccine Preventable disease |       | Meningitis & Encephalitis |       | HIV/AIDS  |           | Tuberculosis |       | Neglected Tropical diseases |       | Infectious skin conditions |       | Sexually transmitted infections excluding HIV |       | Upper respiratory infections |       | Other unspecified infectious diseases |       | Hepatitis |       | Rheumatic heart disease |       | Maternal sepsis and other maternal infections |       |
|---------------------------------------|--------------------|-------|--------------------|-------|------------------------------|-------|---------|--------|-----------------------------------------------|--------|-----------------------------|-------|---------------------------|-------|-----------|-----------|--------------|-------|-----------------------------|-------|----------------------------|-------|-----------------------------------------------|-------|------------------------------|-------|---------------------------------------|-------|-----------|-------|-------------------------|-------|-----------------------------------------------|-------|
|                                       | Female             | Male  | Female             | Male  | Female                       | Male  | Female  | Male   | Female                                        | Male   | Female                      | Male  | Female                    | Male  | Female    | Male      | Female       | Male  | Female                      | Male  | Female                     | Male  | Female                                        | Male  | Female                       | Male  | Female                                | Male  | Female    | Male  | Female                  |       |                                               |       |
|                                       |                    |       |                    |       |                              |       |         |        |                                               |        |                             |       |                           |       |           |           |              |       |                             |       |                            |       |                                               |       |                              |       |                                       |       |           |       |                         |       |                                               |       |
| Angola                                | -1.3%              | -1.9% | -2.4%              | -2.0% | -1.6%                        | -1.3% | -0.6%   | 0.0%   | 79.0%                                         | 105.2% | -2.9%                       | -2.9% | -1.7%                     | -1.5% | 40.7%     | 99.6%     | -2.2%        | -2.2% | -2.6%                       | -3.0% | -0.1%                      | -0.2% | -1.2%                                         | -1.4% | -0.3%                        | -0.4% | -0.2%                                 | -1.0% | -1.3%     | -2.1% | -1.2%                   | -1.2% | -2.2%                                         |       |
| Bangladesh                            | -2.4%              | -2.3% | -2.0%              | -2.0% | -2.0%                        | -2.3% | -3.3%   | -3.3%  | 156.6%                                        | 239.0% | -3.9%                       | -3.1% | -1.5%                     | -1.7% | 2.8%      | -2.8%     | -2.3%        | -2.5% | 0.0%                        | -0.1% | -1.7%                      | -1.9% | -0.3%                                         | -0.4% | -1.1%                        | -1.3% | -2.8%                                 | -2.8% | -1.6%     | -1.8% | -3.1%                   | -3.1% |                                               |       |
| Belize                                | -0.5%              | -0.4% | 0.4%               | 0.4%  | 0.1%                         | 1.3%  | -3.3%   | -3.3%  | 6.4%                                          | 7.7%   | -1.5%                       | -2.1% | -1.3%                     | -1.5% | -2.2%     | -1.6%     | -0.9%        | 0.2%  | 0.0%                        | 0.1%  | 0.2%                       | -0.0% | -0.1%                                         | -0.2% | 0.3%                         | 0.3%  | -2.3%                                 | -1.1% | -0.8%     | -0.6% | -1.6%                   | -1.6% |                                               |       |
| Bhutan                                | -2.5%              | -2.2% | -2.2%              | -2.1% | -2.0%                        | -1.3% | -3.3%   | -3.3%  | 163.8%                                        | 123.2% | -3.3%                       | -3.3% | -2.0%                     | -1.7% | 16.2%     | 13.0%     | -2.9%        | -2.6% | -2.6%                       | -2.6% | -0.1%                      | -0.1% | -1.5%                                         | -0.0% | -0.4%                        | -0.5% | 0.3%                                  | -0.7% | -2.3%     | -2.0% | -2.1%                   | -1.4% | -3.0%                                         |       |
| Bolivia (Plurinational State of)      | -2.2%              | -1.9% | -1.7%              | -0.8% | -2.0%                        | -1.5% | -3.3%   | -3.3%  | 26.1%                                         | 21.6%  | -3.0%                       | -2.9% | -2.1%                     | -1.6% | 5.6%      | 1.9%      | -2.9%        | -2.6% | -2.1%                       | -1.9% | -0.1%                      | -0.1% | -0.9%                                         | -0.7% | -0.2%                        | -0.2% | -1.4%                                 | -1.0% | -2.1%     | -1.6% | -1.7%                   | -1.2% | -2.7%                                         |       |
| Cabo Verde                            | -2.0%              | -1.0% | -2.3%              | -2.2% | -2.0%                        | 0.1%  | 3.8%    | 4.3%   | 17.9%                                         | 16.6%  | -3.2%                       | -3.2% | -2.0%                     | -0.5% | 1.3%      | 6.6%      | -2.7%        | -2.0% | -2.4%                       | -1.5% | -0.2%                      | -0.2% | -2.4%                                         | -0.4% | 0.5%                         | -2.4% | -2.3%                                 | -0.1% | -2.3%     | -1.5% | -3.1%                   | -3.1% |                                               |       |
| Cambodia                              | 2.2%               | -1.9% | -2.1%              | -2.0% | 2.1%                         | -1.5% | -3.1%   | -3.1%  | 56.5%                                         | 56.7%  | -3.2%                       | -3.1% | -1.4%                     | -1.1% | 173.4%    | 59.0%     | -2.6%        | -2.2% | -2.7%                       | -2.9% | 0.1%                       | -0.2% | -0.4%                                         | -0.2% | -0.4%                        | -0.4% | -1.2%                                 | -0.6% | -1.8%     | -1.3% | -2.1%                   | -1.7% | -3.0%                                         |       |
| Cameroon                              | -0.7%              | -0.9% | -1.7%              | -1.5% | -0.8%                        | -0.2% | 0.2%    | 0.3%   | 33.9%                                         | 48.2%  | -3.0%                       | -2.9% | -1.5%                     | -1.1% | 5.2%      | 22.5%     | -1.7%        | -1.5% | -2.5%                       | -2.6% | -0.0%                      | 0.0%  | -1.6%                                         | 0.0%  | -0.0%                        | -0.0% | -1.6%                                 | -2.5% | -1.5%     | -2.0% | -1.2%                   | -0.6% | -2.0%                                         |       |
| Comoros                               | -1.8%              | -1.8% | -1.8%              | -1.4% | -1.0%                        | -1.0% | -2.2%   | -2.3%  | 41.4%                                         | 50.8%  | -2.4%                       | -2.4% | -0.6%                     | -0.5% | 65.0%     | 59.2%     | -1.7%        | -1.9% | -2.2%                       | -2.1% | -0.1%                      | -0.1% | -0.6%                                         | -0.9% | -0.1%                        | -0.1% | -0.9%                                 | -0.4% | -0.8%     | -0.4% | -1.1%                   | -0.8% | -2.2%                                         |       |
| Congo                                 | -1.9%              | -1.8% | -1.8%              | -1.8% | -1.3%                        | -1.8% | 0.4%    | -1.3%  | 21.2%                                         | 36.5%  | -2.0%                       | -2.3% | -1.4%                     | -1.9% | -1.9%     | 7.2%      | -1.8%        | -2.2% | -3.0%                       | -3.1% | -0.1%                      | -0.3% | -0.9%                                         | -1.0% | -0.1%                        | -0.2% | 0.0%                                  | -1.1% | -1.1%     | -2.0% | -1.0%                   | -1.3% | -2.1%                                         |       |
| Democratic People's Republic of Korea | -0.8%              | -0.6% | 0.3%               | 0.3%  | -1.6%                        | -1.2% | 133.3%  | 100.7% | 10.3%                                         | 14.6%  | -3.1%                       | -3.1% | -1.1%                     | -0.9% | 54.8%     | 52.9%     | -1.1%        | -0.4% | -0.6%                       | -2.1% | -0.0%                      | -0.1% | -0.2%                                         | -0.0% | -0.1%                        | -0.3% | -0.2%                                 | -1.6% | -1.5%     | -1.2% | -0.5%                   | -1.3% | -1.3%                                         |       |
| Djibouti                              | -0.5%              | -1.1% | -1.9%              | -1.6% | -1.2%                        | -0.6% | -1.7%   | -1.5%  | 22.7%                                         | 32.9%  | -2.7%                       | -2.5% | -1.0%                     | -0.2% | 407.4%    | 1,496.0%  | -2.0%        | -1.6% | 2.9%                        | -3.0% | -0.1%                      | -0.0% | -0.7%                                         | -1.3% | -0.1%                        | -0.1% | -1.4%                                 | -1.8% | -1.3%     | -0.6% | -0.9%                   | -0.8% | -1.5%                                         |       |
| Dominican Republic                    | -0.7%              | -1.0% | 0.0%               | -0.5% | -0.4%                        | 0.3%  | -1.6%   | -1.6%  | 14.3%                                         | 18.9%  | -1.9%                       | -2.2% | -1.2%                     | -1.1% | -1.1%     | -0.5%     | -2.1%        | -2.0% | -1.1%                       | -2.0% | -0.0%                      | -0.0% | -0.3%                                         | -1.2% | -0.2%                        | -0.2% | -0.4%                                 | -0.5% | -1.4%     | -1.1% | -1.2%                   | -1.0% | -1.6%                                         |       |
| El Salvador                           | -1.4%              | -1.0% | -1.8%              | -1.9% | -0.9%                        | -0.4% | -2.2%   | -2.9%  | 0.4%                                          | 0.4%   | -2.6%                       | -2.8% | -2.2%                     | -2.2% | 11.8%     | 5.5%      | -2.8%        | -2.8% | -1.6%                       | -1.2% | -0.1%                      | -0.1% | -0.2%                                         | 0.1%  | -0.2%                        | -0.2% | -1.0%                                 | -0.7% | -0.9%     | -1.5% | -0.7%                   | -0.5% | -3.2%                                         |       |
| Eswatini                              | 4.7%               | 2.4%  | -1.2%              | -0.5% | -0.7%                        | 0.8%  | -2.9%   | -2.9%  | 9.6%                                          | 9.8%   | -3.1%                       | -3.0% | -0.9%                     | 0.2%  | 57.1%     | 155.1%    | -0.9%        | -0.4% | -2.1%                       | -1.9% | -0.0%                      | 0.0%  | -0.7%                                         | -0.2% | -0.3%                        | -0.2% | -0.3%                                 | 0.1%  | -1.1%     | 1.0%  | -1.0%                   | -0.6% | -2.2%                                         |       |
| Ghana                                 | -1.3%              | -0.8% | -1.9%              | -1.9% | -1.6%                        | 1.2%  | -0.5%   | 0.8%   | 40.0%                                         | 66.7%  | -3.1%                       | -3.0% | -2.0%                     | -1.2% | 1.1%      | 26.0%     | -3.3%        | -1.8% | -2.3%                       | -2.5% | -0.1%                      | -0.1% | -0.8%                                         | 0.1%  | -0.2%                        | -0.3% | -0.0%                                 | 0.4%  | -0.2%     | -1.7% | -1.3%                   | -0.6% | -2.7%                                         |       |
| Guatemala                             | 2.5%               | -2.3% | -2.9%              | -2.8% | -2.5%                        | -2.2% | -3.2%   | -3.3%  | 6.8%                                          | 9.7%   | -3.2%                       | -3.1% | -1.7%                     | -1.5% | 0.4%      | -1.1%     | 3.1%         | -3.0% | -2.5%                       | -2.5% | 0.0%                       | 0.0%  | -0.3%                                         | -1.0% | -0.4%                        | -0.3% | -1.0%                                 | -0.2% | -1.6%     | -1.1% | -0.8%                   | -0.4% | -2.8%                                         |       |
| Honduras                              | -2.0%              | -1.4% | -2.4%              | -2.1% | -3.0%                        | -2.0% | -3.2%   | -3.2%  | 11.1%                                         | 11.1%  | -2.4%                       | -2.6% | -2.0%                     | -2.0% | -0.4%     | -1.4%     | -2.6%        | -2.5% | -1.2%                       | -1.0% | -0.1%                      | -0.1% | -0.4%                                         | -0.0% | -0.3%                        | -0.2% | -1.8%                                 | -1.8% | -2.1%     | -1.8% | -0.2%                   | -0.1% | -3.1%                                         |       |
| India                                 | -2.2%              | -2.0% | -2.2%              | -2.1% | -1.7%                        | -1.4% | -2.8%   | -2.7%  | 37.1%                                         | 37.0%  | -3.1%                       | -3.1% | -1.9%                     | -1.9% | 187.9%    | 89.6%     | -2.6%        | -2.3% | -2.3%                       | -2.3% | -0.2%                      | -0.2% | -1.6%                                         | -0.1% | -0.4%                        | -0.4% | -0.5%                                 | -1.2% | -1.8%     | -1.3% | -1.8%                   | -1.7% | -3.1%                                         |       |
| Kenya                                 | -1.4%              | -0.2% | -1.5%              | -1.4% | -0.8%                        | 0.4%  | -1.3%   | -1.4%  | 11.3%                                         | 9.9%   | -2.1%                       | -1.9% | -1.3%                     | -0.4% | -1.4%     | 6.7%      | -1.3%        | -0.1% | -1.7%                       | -2.2% | -0.0%                      | -0.0% | -0.6%                                         | -0.5% | 0.0%                         | 0.0%  | 0.8%                                  | 0.1%  | -1.0%     | -0.2% | -1.3%                   | -0.0% | -2.1%                                         |       |
| Kiribati                              | -1.3%              | -1.4% | -1.7%              | -1.9% | -1.0%                        | -0.8% |         |        | 9.8%                                          | 9.7%   | -1.9%                       | -2.0% | -1.3%                     | -1.4% | 1.6%      | 4.6%      | -1.4%        | -1.1% | -1.6%                       | -2.4% | -0.0%                      | -0.1% | -1.4%                                         | -0.1% | 0.0%                         | 0.1%  | 0.0%                                  | -0.8% | -1.4%     | -2.1% | -1.1%                   | -1.0% | -1.2%                                         |       |
| Kyrgyzstan                            | -1.4%              | -1.3% | 0.9%               | 0.9%  | -2.3%                        | -2.2% | -3.3%   | -3.3%  | 2.4%                                          | 4.8%   | -0.2%                       | -1.1% | -2.2%                     | -1.9% | 10.1%     | 5.1%      | -1.0%        | -1.0% | -0.4%                       | 0.2%  | -0.2%                      | -0.1% | -0.1%                                         | -0.1% | -0.1%                        | 0.0%  | 0.1%                                  | 0.2%  | -0.8%     | -2.6% | -1.8%                   | -2.3% | -2.2%                                         | -1.0% |
| Laos People's Democratic Republic     | -2.2%              | -2.1% | -2.1%              | -2.1% | -2.1%                        | -2.0% | -2.7%   | -2.9%  | 75.9%                                         | 81.8%  | -3.1%                       | -3.1% | -2.0%                     | -1.8% | 29,223.0% | 39,068.1% | -2.6%        | -2.5% | -1.6%                       | -2.0% | -0.1%                      | -0.2% | -0.2%                                         | -0.1% | -0.4%                        | -0.4% | -0.8%                                 | -1.2% | -2.5%     | -2.5% | -1.1%                   | -1.2% | -3.1%                                         |       |
| Lesotho                               | 5.2%               | 2.8%  | -0.8%              | -0.6% | 0.6%                         | 1.1%  |         |        | 8.8%                                          | 10.8%  | -3.0%                       | -2.9% | -0.2%                     | 0.2%  | 17.9%     | 43.9%     | 0.6%         | 0.2%  | -2.9%                       | -2.9% | 0.0%                       | 0.0%  | -0.5%                                         | -0.1% | -0.4%                        | -0.4% | -0.2%                                 | 0.1%  | -0.8%     | -0.3% | -0.5%                   | -0.5% | -1.9%                                         |       |
| Maldives                              | -2.1%              | -1.4% | -2.1%              | -1.8% | -2.6%                        | -1.6% |         |        | 19.4%                                         | 14.7%  | -3.2%                       | -3.2% | -1.9%                     | -1.5% | 17.5%     | 14.2%     | -3.1%        | -2.9% | -2.1%                       | -1.4% | -0.1%                      | -0.1% | -0.7%                                         | 0.0%  | -0.2%                        | -0.3% | -1.5%                                 | -1.4% | -2.9%     | -1.6% | -2.6%                   | -1.7% | -3.0%                                         |       |
| Marshall Islands                      | -0.6%              | -1.4% | -1.7%              | -2.0% | -0.1%                        | -1.5% |         |        | 1.8%                                          | 2.5%   | -2.1%                       | -2.1% | -1.1%                     | -2.0% | 24.6%     | 21.0%     | -1.3%        | -1.7% | -1.4%                       | -1.0% | -0.0%                      | -0.1% | -0.0%                                         | -0.1% | -0.1%                        | -0.1% | -0.1%                                 | -1.2% | -1.7%     | -2.2% | 0.2%                    | -1.3% | -1.7%                                         |       |
| Mauritania                            | 1.5%               | -1.2% | -2.0%              | -1.9% | -1.7%                        | -1.8% | 12.8%   | 12.6%  | 45.1%                                         | 64.6%  | -3.1%                       | -3.1% | -2.0%                     | -2.0% | -1.7%     | -1.6%     | -2.5%        | -2.6% | -1.6%                       | -2.4% | -0.1%                      | -0.2% | -1.9%                                         | -0.1% | -0.1%                        | -0.2% | -0.8%                                 | -1.4% | -1.8%     | -2.1% | -1.7%                   | -1.3% | -2.9%                                         |       |
| Micronesia (Federated States of)      | -1.1%              | -1.3% | -1.9%              | -2.0% | -0.7%                        | -0.8% |         |        | 3.1%                                          | 5.0%   | -2.6%                       | -2.6% | -1.4%                     | -1.5% | 41.0%     | 39.0%     | -2.0%        | -2.0% | -2.4%                       | -2.8% | -0.0%                      | -0.1% | -0.0%                                         | 0.1%  | -0.1%                        | -0.1% | -0.1%                                 | -0.5% | -1.7%     | -1.4% | -0.7%                   | -0.8% | -2.3%                                         |       |
| Mongolia                              | -2.0%              | -1.4% | 0.3%               | 0.2%  | -2.1%                        | -1.8% |         |        | 10.6%                                         | 11.3%  | -2.3%                       | -2.3% | -2.8%                     | -2.4% | 1,639.7%  | 1,581.8%  | -1.8%        | -1.3% | -2.5%                       | -1.3% | -0.0%                      | -0.0% | 0.0%                                          | 0.1%  | -0.2%                        | -0.3% | -0.8%                                 | -2.4% | -2.6%     | -2.1% | -1.3%                   | -1.0% | -2.7%                                         |       |
| Morocco                               | -1.9%              | -1.3% | -1.1%              | -1.2% | -1.3%                        | -0.9% | -3.3%   | -3.3%  | 17.6%                                         | 27.3%  | -3.0%                       | -3.0% | -1.6%                     | -1.5% | 16.4%     | 13.9%     | -2.5%        | -2.5% | -1.5%                       | -0.8% | -0.0%                      | -0.0% | -0.6%                                         | -0.2% | -0.2%                        | -0.1% | -0.6%                                 | -1.0% | -2.0%     | -2.0% | -1.9%                   | -1.6% | -3.1%                                         |       |
| Myanmar                               | -2.2%              | -1.9% | -2.0%              | -1.8% | -2.3%                        | -1.8% | -3.2%   | -3.2%  | 52.2%                                         | 63.3%  | -3.1%                       | -3.0% | -2.7%                     | -1.7% | 169.7%    | 60.1%     | -2.8%        | -2.3% | -2.1%                       | -2.4% | -0.1%                      | -0.1% | -0.5%                                         | -0.1% | -0.5%                        | -0.2% | 0.2%                                  | 0.7%  | -1.8%     | -1.5% | -1.9%                   | -1.6% | -2.7%                                         |       |
| Nicaragua                             | -1.3%              | -0.5% | -1.6%              | -1.0% | -1.3%                        | 0.6%  | -2.7%   | -2.5%  | -1.1%                                         | -0.5%  | -2.7%                       | -2.7% | -2.1%                     | -1.3% | 51.0%     | 47.7%     | -2.8%        | -2.8% | -1.8%                       | -1.4% | -0.0%                      | 0.0%  | -0.5%                                         | 0.2%  | -0.1%                        | -0.1% | -1.7%                                 | -0.2% | -1.3%     | 0.4%  | -1.3%                   | -0.7% | -2.9%                                         |       |
| Nigeria                               | -1.3%              | -1.5% | -1.8%              | -1.7% | -2.1%                        | -1.9% | -0.9%   | -0.7%  | 28.5%                                         | 43.7%  | -3.0%                       | -2.8% | -1.6%                     | -1.3% | 2.7%      | 11.9%     | -2.1%        | -2.0% | -1.7%                       | -2.5% | 0.0%                       | 0.1%  | -1.6%                                         | -0.1% | -0.2%                        | -0.4% | 2.7%                                  | -0.3% | -1.8%     | -1.7% | -1.5%                   | -1.1% | -2.0%                                         |       |
| Palestine                             | -1.3%              | -1.4% | -1.1%              | -1.0% | -1.5%                        | -1.7% |         |        | 4.0%                                          | 8.3%   | -3.2%                       | -3.2% | -1.9%                     | -2.1% | 104.0%    | 28.5%     | -2.5%        | -2.7% | -1.8%                       | -2.7% | -0.0%                      | -0.0% | -0.1%                                         | 0.0%  | -0.2%                        | -0.1% | -0.9%                                 | -0.7% | -1.9%     | -1.4% | -1.0%                   | -0.9% | -2.5%                                         |       |
| Sao Tome and Principe                 | -2.3%              | -1.6% | -1.5%              | -1.1% | 0.0%                         | 3.0%  | -3.0%   | -3.0%  | 16.3%                                         | 28.4%  | -2.9%                       | -2.7% | -0.3%                     | 1.0%  | -1.9%     | -2.4%     | -1.8%        | -1.1% | -1.9%                       | -1.7% | -0.0%                      | 0.1%  | -1.0%                                         | 0.1%  | -0.1%                        | -0.1% | 0.2%                                  | 1.3%  | -1.4%     | -0.2% | -0.6%                   | 0.6%  | -2.5%                                         |       |
| Sudan                                 | -1.9%              | -2.1% | -0.6%              | -0.5% | -1.7%                        | -1.0% | -1.9%   | -2.2%  | 37.6%                                         | 44.7%  | -3.3%                       | -3.2% | -2.4%                     | -2.2% | 15.6%     | 54.7%     | -2.7%        | -2.4% | -2.5%                       | -2.7% | 0.0%                       | 0.0%  | -0.5%                                         | -0.0% | -0.2%                        | -0.2% | -0.6%                                 | -0.8% | -2.0%     | -2.4% | -2.1%                   | -1.5% | -2.8%                                         |       |
| Tajikistan                            | -1.4%              | -0.6% | 0.6%               | 0.5%  | -1.7%                        | -0.8% | -3.3%   | -3.3%  | 6.2%                                          | 8.4%   | -1.8%                       | -1.7% | -2.5%                     | -2.2% | 7.4%      | 0.8%      | -0.2%        | 2.1%  | -1.3%                       | -0.4% | -0.0%                      | -0.0% | -0.9%                                         | -0.2% | 0.2%                         | 0.1%  | -0.0%                                 | -0.5% | -2.4%     | -0.8% | -2.2%                   | -1.6% | -1.4%                                         |       |
| Timor-Leste                           | -2.1%              | -1.9% |                    |       |                              |       |         |        |                                               |        |                             |       |                           |       |           |           |              |       |                             |       |                            |       |                                               |       |                              |       |                                       |       |           |       |                         |       |                                               |       |

|                                  | Total communicable |       | Enteric infections |       | Lower respiratory infections |       | Malaria |       | Neonatal sepsis and other neonatal infections |        | Vaccine Preventable disease |       | Meningitis & Encephalitis |       | HIV/AIDS |          | Tuberculosis |       | Neglected Tropical diseases |       | Infectious skin conditions |       | Sexually transmitted infections excluding HIV |       | Upper respiratory infections |       | Other unspecified infectious diseases |       | Hepatitis |       | Rheumatic heart disease |       | Maternal sepsis and other maternal infections |
|----------------------------------|--------------------|-------|--------------------|-------|------------------------------|-------|---------|-------|-----------------------------------------------|--------|-----------------------------|-------|---------------------------|-------|----------|----------|--------------|-------|-----------------------------|-------|----------------------------|-------|-----------------------------------------------|-------|------------------------------|-------|---------------------------------------|-------|-----------|-------|-------------------------|-------|-----------------------------------------------|
|                                  | Female             | Male  | Female             | Male  | Female                       | Male  | Female  | Male  | Female                                        | Male   | Female                      | Male  | Female                    | Male  | Female   | Male     | Female       | Male  | Female                      | Male  | Female                     | Male  | Female                                        | Male  | Female                       | Male  | Female                                | Male  | Female    | Male  | Female                  |       |                                               |
|                                  |                    |       |                    |       |                              |       |         |       |                                               |        |                             |       |                           |       |          |          |              |       |                             |       |                            |       |                                               |       |                              |       |                                       |       |           |       |                         |       |                                               |
| Albania                          | -1.3%              | -1.3% | -0.7%              | -0.6% | -2.5%                        | -2.1% | -3.0%   | -3.0% | 4.0%                                          | 8.3%   | -3.1%                       | -3.0% | -2.2%                     | -1.9% | 5.6%     | 13.6%    | -2.6%        | -2.6% | -2.3%                       | -2.6% | -0.0%                      | -0.1% | -0.3%                                         | 0.1%  | -0.2%                        | -0.2% | -1.4%                                 | -1.3% | -1.9%     | -1.2% | -1.3%                   | -1.1% | -2.0%                                         |
| Algeria                          | -1.8%              | -1.4% | -0.7%              | -0.9% | -1.9%                        | -1.9% | -3.0%   | -3.0% | 16.6%                                         | 22.3%  | -3.1%                       | -3.1% | -1.9%                     | -2.0% | 10.8%    | 14.3%    | -2.8%        | -2.7% | -1.6%                       | -2.1% | 0.0%                       | 0.0%  | -0.1%                                         | -0.1% | -0.0%                        | -0.0% | -1.0%                                 | -1.0% | -1.9%     | -1.9% | -2.1%                   | -1.7% | -3.1%                                         |
| Armenia                          | -0.7%              | -0.1% | 0.5%               | 0.7%  | -1.3%                        | 0.4%  | -3.3%   | -3.3% | -0.5%                                         | -0.2%  | -1.8%                       | 0.1%  | -1.7%                     | -0.9% | 15.8%    | 27.9%    | -1.9%        | -1.2% | -0.8%                       | -0.2% | -0.0%                      | 0.0%  | -0.5%                                         | -0.6% | -0.1%                        | -0.1% | 0.5%                                  | -0.2% | -1.5%     | 0.5%  | -1.5%                   | -1.1% | -2.0%                                         |
| Azerbaijan                       | -0.9%              | -0.3% | 1.1%               | 1.0%  | -1.0%                        | -0.5% | -3.3%   | -3.3% | 5.8%                                          | 11.1%  | -2.1%                       | -2.3% | -1.2%                     | -1.1% | 4.8%     | -0.2%    | -1.5%        | -0.2% | -1.9%                       | -1.0% | -0.0%                      | -0.0% | -0.8%                                         | -0.8% | -0.1%                        | -0.2% | -0.3%                                 | -0.4% | -1.6%     | -0.3% | -1.4%                   | -1.0% | -1.8%                                         |
| Botswana                         | -1.1%              | -0.9% | -1.9%              | -2.4% | -0.3%                        | -1.1% | -0.8%   | -1.5% | 9.7%                                          | 14.2%  | -3.1%                       | -3.1% | -0.8%                     | -1.4% | -0.9%    | 1.8%     | -1.2%        | -1.9% | -2.2%                       | -2.4% | -0.1%                      | -0.1% | -0.9%                                         | -0.2% | -0.3%                        | -0.5% | -0.4%                                 | -1.2% | -1.4%     | -1.8% | -1.1%                   | -1.5% | -2.6%                                         |
| Brazil                           | -1.0%              | -1.3% | -0.6%              | -1.0% | -1.4%                        | -1.4% | -3.1%   | -3.2% | 7.8%                                          | 13.7%  | -2.0%                       | -2.8% | -2.1%                     | -2.0% | 0.2%     | -1.6%    | -2.2%        | -2.0% | -1.0%                       | -1.1% | 0.0%                       | 0.0%  | -0.6%                                         | -0.1% | -0.2%                        | -0.4% | -0.6%                                 | -0.5% | -1.5%     | -1.9% | -1.3%                   | -1.5% | -2.0%                                         |
| China                            | -1.5%              | -1.4% | -1.3%              | -1.7% | -2.5%                        | -2.5% | -3.3%   | -3.3% | 34.5%                                         | 22.7%  | -3.0%                       | -3.0% | -2.3%                     | -2.3% | 15.4%    | 23.8%    | -2.7%        | -2.5% | -2.5%                       | -2.2% | -0.1%                      | -0.1% | -0.7%                                         | -0.4% | -0.5%                        | -0.7% | -2.0%                                 | -2.2% | -2.4%     | -2.3% | -2.4%                   | -2.2% | -3.1%                                         |
| Colombia                         | -1.0%              | -0.9% | -1.6%              | -1.5% | -1.4%                        | -1.3% | -3.1%   | -3.2% | 4.7%                                          | 11.8%  | -2.0%                       | -2.5% | -1.5%                     | -1.7% | 11.9%    | 4.7%     | -2.3%        | -2.5% | -1.2%                       | -0.7% | 0.1%                       | 0.1%  | -0.6%                                         | -0.4% | -0.2%                        | -0.3% | -0.8%                                 | -0.2% | -1.0%     | -1.3% | -2.8%                   | -2.9% | -2.2%                                         |
| Costa Rica                       | -0.9%              | -0.5% | -0.7%              | -0.4% | -1.3%                        | 0.3%  | -3.3%   | -3.3% | -1.5%                                         | -2.1%  | -1.6%                       | -0.9% | -1.6%                     | -1.3% | 0.5%     | 0.9%     | -2.4%        | -2.3% | -1.2%                       | -0.9% | -0.0%                      | 0.0%  | -0.2%                                         | 0.1%  | -0.2%                        | -0.2% | -1.6%                                 | -0.5% | -0.8%     | -0.7% | -2.4%                   | -2.4% | -2.4%                                         |
| Cuba                             | -0.8%              | -0.6% | 1.3%               | 1.1%  | -1.5%                        | -1.5% | -0.2%   | -0.4% | -0.6%                                         | -0.4%  | -2.5%                       | -2.6% | -1.2%                     | -2.6% | 1.2%     | 8.5%     | -2.5%        | -2.5% | -0.8%                       | -0.9% | -0.0%                      | -0.1% | 2.0%                                          | -0.0% | -0.0%                        | -0.1% | -0.2%                                 | 0.2%  | -2.4%     | -2.1% | -1.4%                   | -1.4% | -2.0%                                         |
| Ecuador                          | -2.0%              | -1.5% | -0.8%              | -1.3% | -1.3%                        | -0.1% | -3.3%   | -3.3% | -0.2%                                         | -0.0%  | -2.7%                       | -2.6% | -1.7%                     | -1.5% | 11.5%    | 16.1%    | -3.0%        | -2.6% | -2.1%                       | -1.9% | -0.0%                      | 0.0%  | -0.0%                                         | -0.3% | -0.1%                        | -1.0% | 0.4%                                  | -2.3% | -1.7%     | -1.3% | -1.2%                   | -2.5% | -2.5%                                         |
| Egypt                            | -2.1%              | -1.6% | -0.7%              | -0.8% | -1.9%                        | -0.8% | -3.3%   | -3.3% | 12.6%                                         | 13.9%  | -3.1%                       | -3.0% | -1.9%                     | -1.5% | 2.7%     | 4.9%     | -2.7%        | -2.4% | -3.0%                       | -3.0% | -0.3%                      | -0.3% | -0.2%                                         | -0.3% | -0.2%                        | -0.2% | -1.1%                                 | -1.3% | -2.4%     | -1.6% | -3.3%                   | -1.8% | -3.0%                                         |
| Equatorial Guinea                | -0.4%              | -2.1% | -3.0%              | -2.9% | -2.1%                        | -2.2% | 0.6%    | -1.2% | 100.9%                                        | 128.0% | -3.1%                       | -3.1% | -2.4%                     | -2.4% | 49.6%    | 188.6%   | -2.9%        | -3.0% | -2.7%                       | -3.0% | -0.2%                      | -0.6% | -1.4%                                         | -1.3% | -0.6%                        | -0.9% | -1.3%                                 | -2.0% | -2.0%     | -2.6% | -1.7%                   | -2.0% | -3.2%                                         |
| Fiji                             | -1.2%              | -1.2% | -1.7%              | -1.5% | -1.4%                        | -1.2% | 0.5%    | 2.3%  | 0.5%                                          | 2.3%   | -2.6%                       | -2.5% | -1.9%                     | -1.6% | 12.1%    | 12.6%    | -1.9%        | -1.7% | -1.1%                       | -1.7% | -0.0%                      | -0.0% | -0.5%                                         | -0.0% | -0.1%                        | -0.1% | -0.7%                                 | 0.3%  | -1.4%     | -1.3% | -1.4%                   | -1.2% | -1.7%                                         |
| Gabon                            | -1.0%              | -1.8% | -2.0%              | -2.0% | -1.7%                        | -1.2% | 0.2%    | -1.1% | 24.4%                                         | 28.8%  | -2.6%                       | -2.7% | -1.7%                     | -1.5% | 1.6%     | 12.6%    | -2.0%        | -2.2% | -2.5%                       | -2.8% | -0.1%                      | -0.2% | -0.8%                                         | -0.8% | -0.1%                        | -0.1% | 0.1%                                  | -0.6% | -1.4%     | -1.6% | -0.8%                   | -1.0% | -2.7%                                         |
| Grenada                          | -0.9%              | -0.7% | 0.9%               | 1.0%  | -0.9%                        | -1.0% | -2.5%   | -2.6% | 4.5%                                          | 5.7%   | -2.5%                       | -2.6% | -2.3%                     | -2.4% | -1.7%    | -2.2%    | -2.2%        | -2.2% | -1.7%                       | -1.5% | 0.1%                       | 0.2%  | 0.1%                                          | -0.8% | -0.1%                        | -0.3% | 0.0%                                  | 0.1%  | -2.5%     | -1.2% | -1.6%                   | -1.5% | -2.5%                                         |
| Guyana                           | -1.3%              | -1.5% | -1.3%              | -1.7% | -0.0%                        | -0.2% | -2.8%   | -2.9% | 2.8%                                          | 9.2%   | -2.5%                       | -2.4% | -1.4%                     | -1.3% | 2.1%     | -1.1%    | -1.7%        | -1.7% | 1.9%                        | -0.7% | 0.1%                       | 0.1%  | 1.0%                                          | -1.3% | -0.2%                        | -0.2% | -0.8%                                 | -0.5% | -2.3%     | -1.9% | -1.1%                   | -1.5% | -1.9%                                         |
| Indonesia                        | -2.1%              | -1.6% | -2.1%              | -2.1% | -2.1%                        | -1.8% | -2.6%   | -2.7% | 15.6%                                         | 12.2%  | -2.9%                       | -2.9% | -1.7%                     | -1.6% | 5,901.6% | 7,410.9% | -2.6%        | -1.8% | -1.6%                       | -1.7% | -0.0%                      | -0.1% | -0.6%                                         | -0.1% | -0.3%                        | -0.4% | -0.9%                                 | -1.6% | -2.7%     | -1.3% | -1.9%                   | -1.8% | -2.9%                                         |
| Iran (Islamic Republic of)       | -1.5%              | -1.5% | 0.2%               | -0.3% | -1.1%                        | -0.7% | -3.3%   | -3.3% | 7.9%                                          | 21.1%  | -3.0%                       | -3.0% | -1.2%                     | -1.4% | 97.9%    | 35.4%    | -2.3%        | -2.4% | -1.7%                       | -2.1% | -0.0%                      | 0.0%  | 0.0%                                          | 0.2%  | -0.1%                        | -0.1% | 0.3%                                  | 0.6%  | -1.9%     | -1.3% | -1.6%                   | -1.2% | -2.9%                                         |
| Iraq                             | -1.5%              | -1.4% | -1.0%              | -1.0% | -1.8%                        | -1.6% | -3.3%   | -3.3% | 5.7%                                          | 15.9%  | -2.9%                       | -2.9% | -1.6%                     | -1.7% | 29.4%    | 25.2%    | -2.7%        | -2.5% | -1.1%                       | -1.6% | -0.0%                      | -0.1% | -0.6%                                         | -0.1% | -0.0%                        | -0.1% | -0.5%                                 | -0.6% | -2.0%     | -1.6% | -1.8%                   | -1.6% | -2.1%                                         |
| Jamaica                          | 0.3%               | 0.2%  | 0.3%               | 0.6%  | -0.4%                        | -0.2% | 10.2%   | 9.3%  | -1.5%                                         | -2.5%  | -0.9%                       | -1.1% | 1.5%                      | 0.3%  | -1.6%    | -1.8%    | -0.3%        | 0.3%  | -0.0%                       | 0.0%  | -0.2%                      | 0.1%  | -0.1%                                         | -0.1% | 2.5%                         | 6.1%  | -0.7%                                 | -0.9% | -1.6%     | -1.5% | -2.5%                   | -2.5% | -2.5%                                         |
| Mexico                           | -1.2%              | -1.0% | -2.5%              | -2.3% | -1.6%                        | -1.0% | -3.2%   | -3.2% | 2.6%                                          | 3.0%   | -2.4%                       | -2.5% | -1.3%                     | -1.1% | 1.8%     | 0.7%     | -2.6%        | -2.5% | -1.4%                       | -1.6% | 0.2%                       | 0.3%  | -0.3%                                         | -0.8% | -0.3%                        | -0.3% | -1.3%                                 | -1.1% | -1.0%     | -0.8% | -1.9%                   | -1.7% | -2.1%                                         |
| Namibia                          | 0.0%               | 0.1%  | -2.0%              | -1.6% | -1.4%                        | -0.5% | -2.6%   | -2.7% | 15.0%                                         | 17.4%  | -3.2%                       | -3.2% | -1.5%                     | -0.9% | 8.4%     | 35.5%    | -1.6%        | -1.3% | -1.4%                       | -1.1% | -0.1%                      | -0.1% | -0.8%                                         | -0.1% | -0.2%                        | -0.3% | -0.9%                                 | -0.7% | -1.2%     | -0.5% | -1.3%                   | -1.0% | -2.6%                                         |
| Nauru                            | -0.5%              | -0.6% | -1.3%              | -1.2% | -0.6%                        | -0.7% | 3.4%    | 3.6%  | -2.8%                                         | -2.8%  | -1.2%                       | -1.4% | -1.2%                     | -1.4% | 108.3%   | 48.1%    | -1.9%        | -1.7% | 1.5%                        | 5.9%  | -0.0%                      | -0.0% | -0.1%                                         | -0.1% | 0.1%                         | 0.1%  | -0.4%                                 | -0.2% | -1.3%     | -1.3% | -0.3%                   | -0.4% | -1.6%                                         |
| Panama                           | -0.7%              | 0.6%  | -1.0%              | -0.9% | -0.0%                        | 0.1%  | -3.0%   | -3.3% | 1.8%                                          | 1.6%   | -1.6%                       | -2.2% | -1.6%                     | -2.0% | 2.3%     | 12.7%    | -1.9%        | -1.8% | -1.9%                       | -2.2% | -0.0%                      | 0.0%  | 0.4%                                          | 0.2%  | -0.2%                        | -0.2% | -0.4%                                 | 1.5%  | -1.4%     | -1.2% | -1.6%                   | -1.4% | -1.7%                                         |
| Paraguay                         | -0.9%              | -0.2% | 0.3%               | -0.3% | -1.0%                        | 0.2%  | -3.3%   | -3.3% | -2.5%                                         | -1.7%  | -2.5%                       | -2.6% | -1.7%                     | -1.3% | 26.8%    | 16.9%    | -2.2%        | -1.4% | -2.1%                       | -1.5% | -0.0%                      | 0.1%  | -0.3%                                         | -0.1% | -0.1%                        | -0.1% | -0.1%                                 | 1.4%  | -1.2%     | -0.8% | -0.8%                   | -0.5% | -2.9%                                         |
| Peru                             | -1.8%              | -1.9% | -0.3%              | -0.2% | -1.7%                        | -1.6% | -3.1%   | -3.2% | 14.8%                                         | 20.0%  | -2.2%                       | -2.5% | -1.5%                     | -1.6% | 5.3%     | 1.4%     | -3.0%        | -3.0% | -1.7%                       | -1.7% | -0.1%                      | -0.1% | -0.6%                                         | -0.5% | -0.2%                        | -0.2% | -1.4%                                 | -0.2% | -2.2%     | -2.4% | -1.0%                   | -0.8% | -3.0%                                         |
| Philippines                      | -1.0%              | -0.9% | -0.5%              | -0.5% | -0.9%                        | -0.6% | -3.2%   | -3.2% | 9.7%                                          | 9.2%   | -2.7%                       | -2.4% | -1.4%                     | -1.4% | 11.0%    | 8.9%     | -1.8%        | -1.6% | -1.7%                       | -2.1% | -0.0%                      | -0.1% | 1.2%                                          | 0.2%  | -0.1%                        | -0.2% | -0.8%                                 | 3.4%  | -2.2%     | -1.6% | 3.2%                    | 2.4%  | -2.1%                                         |
| Saint Lucia                      | -0.9%              | -0.8% | 1.1%               | 0.9%  | -1.1%                        | -0.3% | 5.0%    | 6.4%  | -2.2%                                         | -1.4%  | -1.9%                       | -1.8% | -1.5%                     | -1.3% | -2.5%    | -2.3%    | -2.2%        | -2.1% | 0.1%                        | 0.2%  | 0.1%                       | -1.0% | -0.1%                                         | -0.2% | 0.5%                         | 0.4%  | -1.8%                                 | -1.6% | -1.5%     | -1.1% | -2.4%                   | -2.4% |                                               |
| Saint Vincent and the Grenadines | -0.5%              | -0.5% | 0.1%               | 0.5%  | -0.8%                        | 0.0%  | 2.1%    | 5.6%  | -0.3%                                         | -1.2%  | -2.1%                       | -2.1% | 0.6%                      | -0.5% | -2.4%    | -1.9%    | -1.6%        | -1.5% | 0.2%                        | 0.3%  | -0.1%                      | -2.0% | -0.1%                                         | -0.2% | -0.4%                        | -0.2% | -2.1%                                 | -1.2% | -1.3%     | -1.0% | -1.4%                   | -1.4% |                                               |
| Samoa                            | -0.3%              | -0.7% | -1.1%              | -1.2% | -0.5%                        | -0.9% | 1.9%    | 2.2%  | 0.1%                                          | -0.4%  | -0.9%                       | -1.3% | 24.4%                     | 31.2% | -1.4%    | -1.5%    | 0.2%         | -0.4% | -0.0%                       | 0.0%  | -0.1%                      | -0.1% | -0.1%                                         | -0.1% | -0.3%                        | -0.4% | -0.8%                                 | -1.3% | -0.4%     | -0.8% | -2.6%                   | -2.6% |                                               |
| South Africa                     | 3.8%               | 4.6%  | -1.9%              | -1.2% | -2.3%                        | -0.5% | -1.1%   | -0.3% | 17.0%                                         | 18.0%  | -2.6%                       | -2.4% | -1.8%                     | -0.3% | 48.8%    | 150.4%   | -1.5%        | 0.1%  | 2.2%                        | -1.9% | -0.1%                      | -0.1% | -1.4%                                         | -0.2% | -0.4%                        | -0.2% | 0.8%                                  | 3.7%  | -2.1%     | -1.2% | -1.7%                   | -0.6% | -2.7%                                         |
| Suriname                         | -1.3%              | -1.5% | -0.1%              | -0.3% | -0.7%                        | -0.7% | -3.3%   | -3.3% | 6.9%                                          | 9.7%   | -2.5%                       | -2.5% | -1.7%                     | -1.8% | -0.8%    | -1.2%    | -2.3%        | -2.2% | -0.2%                       | 0.0%  | 0.1%                       | 0.3%  | -0.2%                                         | -0.7% | -0.1%                        | -0.1% | 0.2%                                  | 0.9%  | -2.2%     | -2.1% | -1.2%                   | -1.1% | -1.5%                                         |
| Syrian Arab Republic             | -1.2%              | -1.0% | -0.8%              | -1.1% | -0.5%                        | -0.2% | -3.3%   | -3.3% | 1.8%                                          | 3.0%   | -3.0%                       | -3.0% | -1.8%                     | -1.6% | 5.4%     | 18.9%    | -2.6%        | -2.6% | 2.3%                        | 4.9%  | -0.0%                      | -0.0% | -0.8%                                         | -0.2% | -0.1%                        | -0.1% | -0.9%                                 | -0.9% | -1.8%     | -1.8% | -2.5%                   | -2.5% | -2.9%                                         |
| Thailand                         | -1.0%              | -1.2% | -1.9%              | -1.7% | 0.6%                         | 0.2%  | -3.3%   | -3.3% | 14.7%                                         | 8.6%   | -2.9%                       | -2.9% | -1.7%                     | -1.7% | 19.5%    | 14.3%    | -2.8%        | -2.9% | -2.4%                       | -2.9% | -0.3%                      | -0.5% | -0.9%                                         | -0.2% | -0.2%                        | -0.2% | -1.6%                                 | -1.3% | -2.2%     | -1.8% | -1.9%                   | -2.3% | -1.9%                                         |
| Tokelau                          | -1.1%              | -0.9% | -1.6%              | -1.3% | -1.2%                        | -1.3% | 2.7%    | 3.6%  | -2.3%                                         | -2.4%  | -1.5%                       | -1.5% | 109.9%                    | 52.8% | -2.3%    | -2.6%    | -0.8%        | 1.6%  | -0.0%                       | 0.0%  | -0.0%                      | 0.0%  | -0.9%                                         | -0.2% | -0.2%                        | -0.2% | -0.7%                                 | -0.5% | -1.3%     | -1.0% | -1.3%                   | -1.3% | -2.5%                                         |
| Tonga                            | -0.7%              | -0.4% | -0.3%              | 0.1%  | -0.5%                        | 0.9%  | 1.7%    | 2.0%  | -1.7%                                         | -1.4%  | -1.1%                       | -0.0% | 11.6%                     | 12.6% | -1.3%    | -0.8%    | -1.2%        | -1.7% | -0.0%                       | 0.0%  | -0.0%                      | 0.1%  | -0.1%                                         | -0.1% | -0.3%                        | 0.7%  | -1.8%                                 | -1.2% | -0.6%     | -0.2% | -1.4%                   | -1.4% |                                               |
| Tunisia                          | -0.9%              | -0.5% | -0.8%              | -0.9% | -1.2%                        | -0.7% | 5.7%    | 7.0%  | -2.5%                                         | -2.5%  | -1.2%                       | -1.2% | 87.1%                     | 87.1% | -2.4%    | -2.3%    | -1.3%        | -1.3% | -0.0%                       | -0.0% | -0.1%                      | -0.1% | -0.1%                                         | -0.1% | -0.1%                        | -0.2% | -0.4%                                 | -0.4% | -1.6%     | -1.4% | -2.5%                   | -2.2% | -3.0%                                         |
| Turkmenistan                     | -0.9%              | -0.4% | 0.1%               | -0.5% | -1.0%                        | -1.2% | -3.3%   | -3.3% | 12.4%                                         | 18.2%  | -1.5%                       | -1.0% | -0.6%                     | -0.6% | -1.0%    | -0.5%    | -0.6%        | -0.1% | -1.9%                       | -1.3% | 0.0%                       | 0.0%  | -0.9%                                         | -0.6% | -0.1%                        | -0.2% | -0.4%                                 | 0.4%  | -1.8%     | -0.1% | -1.4%                   | -1.6% | -1.0%                                         |
| Uzbekistan                       | -1.1%              | -0.3% | 0.4%               | 0.4%  | 0.2%                         | 1.2%  | -3.3%   | -3.3% | 14.8%                                         | 19.5%  | -1.2%                       | -1.7% | -2.0%                     | -1.6% | 2.7%     | 5.1%     | -0.6%        | -0.3% | -1.4%                       | -0.2% | -0.0%                      | -0.0% | -0.9%                                         | -1.0% | -0.2%                        | -0.2% | -0.5%                                 | -0.2% | -2.4%     | -0.7% | -1.9%                   | -1.6% | -1.3%                                         |
| Viet Nam                         | -1.8%              | -1.3% | -1.5%              | -2.0% | -1.5%                        | -0.4% | -3.1%   | -3.1% | 4.0%                                          | 6.5%   | -3.1%                       | -3.1% | -1.3%                     | -1.0% | 16.6%    | 38.1%    | -2.5%        | -2.2% | -1.4%                       | -2.6% | -0.1%                      | -0.1% | 0.0%                                          | 0.0%  | -0.4%                        | -0.5% | -1.7%                                 | -1.9% | -2.4%     | -1.9% | -2.2%                   | -2.0% | -2.7%                                         |

|                          | Total communicable |       | Enteric infections |       | Lower respiratory infections |       | Malaria |       | Neonatal sepsis and other neonatal infections |       | Vaccine Preventable disease |       | Meningitis & Encephalitis |       | HIV/AIDS |       | Tuberculosis |       | Neglected Tropical diseases |       | Infectious skin conditions |       | Sexually transmitted infections excluding HIV |       | Upper respiratory infections |       | Other unspecified infectious diseases |       | Hepatitis |       | Rheumatic heart disease |       | Maternal sepsis and other maternal infections |       |
|--------------------------|--------------------|-------|--------------------|-------|------------------------------|-------|---------|-------|-----------------------------------------------|-------|-----------------------------|-------|---------------------------|-------|----------|-------|--------------|-------|-----------------------------|-------|----------------------------|-------|-----------------------------------------------|-------|------------------------------|-------|---------------------------------------|-------|-----------|-------|-------------------------|-------|-----------------------------------------------|-------|
|                          | Female             | Male  | Female             | Male  | Female                       | Male  | Female  | Male  | Female                                        | Male  | Female                      | Male  | Female                    | Male  | Female   | Male  | Female       | Male  | Female                      | Male  | Female                     | Male  | Female                                        | Male  | Female                       | Male  | Female                                | Male  | Female    | Male  | Female                  | Male  | Female                                        |       |
|                          |                    |       |                    |       |                              |       |         |       |                                               |       |                             |       |                           |       |          |       |              |       |                             |       |                            |       |                                               |       |                              |       |                                       |       |           |       |                         |       |                                               |       |
| American Samoa           | -0.3%              | -0.6% | -1.0%              | -0.3% | -0.2%                        | -0.8% |         |       | 0.2%                                          | -1.9% | -1.2%                       | -1.2% | 0.7%                      | -0.7% | 14.6%    | 5.3%  | -1.3%        | -2.4% | 1.4%                        | -1.6% | -0.0%                      | 0.2%  | -0.3%                                         | -0.0% | 0.0%                         | 0.1%  | -0.3%                                 | 1.4%  | -0.0%     | -0.0% | -0.4%                   | -1.0% | -2.0%                                         |       |
| Antigua and Barbuda      | -0.9%              | -0.5% | 0.8%               | 1.0%  | -1.0%                        | -0.3% |         |       | -1.3%                                         | 0.6%  | -1.3%                       | -2.4% | -2.0%                     | -2.2% | -1.1%    | -0.3% | -2.1%        | -2.3% | -1.2%                       | 0.1%  | 0.0%                       | 0.2%  | -0.0%                                         | -0.8% | -0.1%                        | -0.1% | 0.6%                                  | 0.6%  | -2.4%     | -2.0% | -1.2%                   | -0.9% | -1.8%                                         |       |
| Argentina                | -0.7%              | -0.4% | 0.1%               | 0.6%  | 1.9%                         | 2.9%  | -3.3%   | -3.3% | -2.1%                                         | -2.9% | -1.4%                       | -1.2% | -1.0%                     | -0.9% | 0.6%     | -0.7% | -2.2%        | -2.1% | -2.6%                       | -2.4% | 0.0%                       | 0.1%  | -0.2%                                         | -0.6% | -0.1%                        | -0.1% | -0.2%                                 | -0.1% | -1.6%     | -0.8% | -0.9%                   | -0.9% | -2.1%                                         |       |
| Bahamas                  | 0.0%               | -0.5% | 1.5%               | 1.3%  | -0.2%                        | -0.5% |         |       | 1.5%                                          | -0.2% | -1.2%                       | -0.5% | -1.2%                     | -1.7% | 0.5%     | -0.1% | -2.0%        | -1.8% | -0.1%                       | -0.1% | 0.1%                       | 0.1%  | 0.3%                                          | -0.2% | -0.0%                        | -0.0% | 0.8%                                  | 0.7%  | -1.8%     | -1.0% | -0.7%                   | -0.8% | -1.8%                                         |       |
| Bahrain                  | -1.2%              | -0.6% | -0.7%              | -0.5% | -1.7%                        | -0.1% |         |       | 4.2%                                          | 2.8%  | -2.7%                       | -2.5% | -1.8%                     | -1.4% | 2.5%     | 0.3%  | -2.6%        | -2.2% | -1.7%                       | -1.9% | -0.4%                      | -0.3% | -0.4%                                         | -0.3% | -0.0%                        | -0.0% | -1.3%                                 | -0.2% | -1.9%     | -1.0% | -2.2%                   | -2.1% | -2.7%                                         |       |
| Barbados                 | -0.1%              | -0.7% | 1.5%               | 1.1%  | -0.6%                        | -0.9% |         |       | 3.6%                                          | 4.4%  | -1.9%                       | -2.1% | -1.7%                     | -2.1% | -0.1%    | -1.9% | -2.2%        | -2.3% | 0.3%                        | 2.2%  | 0.1%                       | 0.1%  | 0.1%                                          | -0.6% | -0.1%                        | -0.0% | 0.1%                                  | 0.2%  | -2.1%     | -1.9% | -1.0%                   | -0.9% | -1.8%                                         |       |
| Belarus                  | -0.7%              | -0.6% | 0.2%               | -0.1% | -2.2%                        | -1.2% |         |       | -0.9%                                         | -0.0% | -0.5%                       | -0.3% | -1.0%                     | -1.0% | 4.8%     | 3.5%  | -2.1%        | -1.6% | -1.2%                       | -1.3% | -0.0%                      | -0.0% | -0.3%                                         | -1.0% | -0.2%                        | -0.2% | 0.3%                                  | 0.4%  | -0.8%     | 0.3%  | 3.3%                    | -2.7% | -1.9%                                         |       |
| Bosnia and Herzegovina   | -1.0%              | -0.8% | -1.0%              | -0.8% | -2.0%                        | -1.4% |         |       | -0.2%                                         | -0.2% | -1.1%                       | -0.8% | -1.8%                     | -1.5% | 5.2%     | -0.0% | -2.6%        | -2.1% | -1.6%                       | -1.8% | -0.0%                      | -0.0% | -0.3%                                         | 0.1%  | -0.3%                        | -0.2% | -1.1%                                 | -0.3% | -1.3%     | -0.8% | -2.5%                   | -2.1% | -2.8%                                         |       |
| Bulgaria                 | -1.0%              | -1.2% | -0.7%              | -0.7% | -2.1%                        | -2.0% |         |       | 12.3%                                         | 23.1% | 0.2%                        | 0.2%  | -0.8%                     | -0.7% | 5.0%     | 2.6%  | -1.7%        | -1.7% | -1.7%                       | -2.4% | 0.1%                       | 0.0%  | -0.4%                                         | 0.0%  | -0.1%                        | -0.1% | -0.3%                                 | -0.7% | -1.1%     | -0.6% | -2.5%                   | -2.5% | -2.3%                                         |       |
| Chile                    | -1.3%              | -1.3% | -0.5%              | -0.9% | -2.6%                        | -2.7% |         |       | -0.2%                                         | 0.7%  | -0.2%                       | -0.5% | -1.5%                     | -1.6% | 4.7%     | 2.8%  | -2.5%        | -2.6% | -2.5%                       | -2.5% | -0.0%                      | -0.0% | -0.3%                                         | -0.7% | -0.2%                        | -0.3% | 0.3%                                  | 0.5%  | -1.6%     | -1.4% | -2.6%                   | -2.7% | -2.8%                                         |       |
| Cook Islands             | -1.3%              | -1.3% | -0.9%              | -0.7% | -2.0%                        | -1.5% |         |       | 0.7%                                          | 1.7%  | -1.8%                       | -1.7% | -1.1%                     | -0.9% | 110.9%   | 49.5% | -2.2%        | -2.0% | -2.5%                       | -2.9% | -0.0%                      | -0.0% | 0.0%                                          | 0.0%  | -0.2%                        | -0.2% | -0.6%                                 | -1.1% | -1.5%     | -1.2% | -2.0%                   | -1.7% | -1.4%                                         |       |
| Croatia                  | -0.7%              | -0.7% | -0.8%              | -1.1% | -2.5%                        | -2.2% |         |       | 1.9%                                          | 2.7%  | -0.1%                       | -0.1% | -1.5%                     | -1.5% | 4.6%     | 0.9%  | -2.7%        | -2.9% | -1.0%                       | -1.4% | 0.0%                       | -0.0% | -0.1%                                         | 0.1%  | -0.1%                        | -0.1% | 0.2%                                  | -0.1% | -1.4%     | -1.4% | -2.8%                   | -2.7% | -2.2%                                         |       |
| Dominica                 | -0.5%              | -0.6% | 0.7%               | 0.5%  | -0.4%                        | -0.5% |         |       | 2.6%                                          | 2.4%  | -1.6%                       | -1.6% | -1.6%                     | -1.8% | 0.1%     | -0.7% | -2.0%        | -1.7% | -1.2%                       | -1.0% | 0.0%                       | -0.0% | -0.2%                                         | -0.9% | -0.2%                        | -0.2% | 0.9%                                  | 1.1%  | -2.3%     | -1.9% | -1.1%                   | -1.0% | -1.0%                                         |       |
| Georgia                  | -1.0%              | -0.9% | 0.9%               | 1.0%  | -2.4%                        | -2.1% | -3.3%   | -3.3% | 1.0%                                          | 2.0%  | 0.2%                        | -0.1% | -1.4%                     | -0.8% | 20.8%    | 30.7% | -1.5%        | -1.5% | -0.7%                       | 0.1%  | 0.0%                       | -0.0% | 0.0%                                          | -0.2% | -0.0%                        | 0.0%  | -0.0%                                 | -2.2% | 1.2%      | -1.3% | 0.0%                    | -1.0% | -0.8%                                         | 0.1%  |
| Greece                   | -0.3%              | -0.5% | -0.6%              | -0.5% | -0.6%                        | -1.0% |         |       | -1.2%                                         | -1.5% | -0.3%                       | -0.2% | -1.2%                     | -0.9% | 1.9%     | -1.5% | -2.1%        | -2.2% | -0.7%                       | -1.0% | 0.0%                       | -0.0% | -0.1%                                         | 0.0%  | -0.1%                        | -0.1% | 0.9%                                  | 0.6%  | -0.6%     | -0.7% | -2.0%                   | -2.4% | -2.2%                                         |       |
| Greenland                | -0.7%              | -0.8% | 0.1%               | 0.1%  | -1.8%                        | -1.8% |         |       | 3.5%                                          | 5.6%  | -1.9%                       | -1.9% | -2.1%                     | -1.3% | -1.7%    | -0.8% | -1.0%        | -1.2% | 0.1%                        | 0.1%  | -0.4%                      | 0.3%  | -0.0%                                         | -0.1% | -0.4%                        | 0.3%  | -0.6%                                 | 0.2%  | -1.0%     | 0.7%  | -2.5%                   | -2.0% | -1.7%                                         |       |
| Hungary                  | -1.0%              | -0.9% | -0.6%              | -0.7% | -2.1%                        | -2.1% |         |       | -2.3%                                         | 2.4%  | -1.4%                       | -1.0% | -2.2%                     | -2.3% | -2.6%    | -2.6% | -2.6%        | -2.5% | -1.1%                       | -1.3% | 0.0%                       | 0.0%  | -0.2%                                         | 0.0%  | -0.2%                        | -0.2% | -0.4%                                 | -0.1% | -1.9%     | -1.9% | -2.6%                   | -2.8% | -2.2%                                         |       |
| Israel                   | -0.6%              | -0.6% | -0.3%              | -0.4% | -1.5%                        | -1.2% |         |       | -1.1%                                         | -0.1% | -0.3%                       | 0.0%  | -1.6%                     | -1.9% | -1.1%    | -1.2% | -2.4%        | -2.7% | -1.3%                       | -1.3% | 0.0%                       | 0.1%  | -0.2%                                         | -0.7% | -0.1%                        | -0.2% | 0.4%                                  | 0.8%  | -1.8%     | -1.2% | -2.1%                   | -1.8% | -2.1%                                         |       |
| Italy                    | -1.0%              | -1.2% | -0.6%              | -0.6% | -2.0%                        | -2.2% |         |       | 0.2%                                          | 1.5%  | -1.0%                       | -0.6% | -1.4%                     | -1.5% | -2.6%    | -3.0% | -2.2%        | -2.3% | -2.6%                       | -3.0% | -0.0%                      | 0.0%  | 0.8%                                          | -2.1% | -0.1%                        | -0.1% | 0.8%                                  | 0.5%  | -1.1%     | -1.6% | -1.9%                   | -2.1% | -2.3%                                         | -2.9% |
| Jordan                   | -1.4%              | -1.0% | -0.9%              | -0.9% | -1.8%                        | -1.4% |         |       | 4.0%                                          | 5.6%  | -2.9%                       | -2.8% | -2.0%                     | -1.6% | 20.0%    | 27.9% | -2.9%        | -2.8% | -1.6%                       | -2.1% | -0.0%                      | -0.0% | -0.2%                                         | -0.2% | -0.1%                        | -0.1% | -1.2%                                 | -1.4% | -1.9%     | -1.8% | -2.7%                   | -2.3% | -2.6%                                         |       |
| Kazakhstan               | -1.4%              | -1.4% | 0.7%               | 0.6%  | -1.8%                        | -1.8% |         |       | 1.3%                                          | 2.8%  | -1.2%                       | -2.5% | -1.8%                     | -1.5% | 7.0%     | 4.8%  | -2.1%        | -2.3% | -1.8%                       | -0.9% | 0.0%                       | -0.0% | -0.1%                                         | -0.5% | -0.2%                        | -0.1% | 0.1%                                  | 0.3%  | -2.1%     | -1.2% | -2.9%                   | -2.0% | -0.7%                                         |       |
| Lebanon                  | -1.2%              | -1.0% | -0.7%              | -0.7% | -1.2%                        | -0.8% |         |       | 5.2%                                          | 6.3%  | -2.6%                       | -2.8% | -1.5%                     | -1.3% | 4.8%     | 0.6%  | -2.6%        | -2.4% | -2.1%                       | -2.5% | -0.0%                      | -0.0% | -0.1%                                         | 0.0%  | -0.0%                        | -0.1% | -0.9%                                 | -0.5% | -1.9%     | -1.3% | -2.6%                   | -2.3% | -2.5%                                         |       |
| Libya                    | -0.8%              | -0.7% | -0.0%              | -0.3% | -0.9%                        | -0.9% |         |       | 1.3%                                          | 2.6%  | -3.0%                       | -3.0% | -1.2%                     | -1.4% | 33.5%    | 22.8% | -2.2%        | -2.1% | -1.4%                       | -0.8% | -0.0%                      | -0.0% | -0.1%                                         | -0.1% | 0.1%                         | 0.1%  | 0.9%                                  | -0.3% | -1.9%     | -1.5% | -1.6%                   | -1.3% | -2.9%                                         |       |
| Malaysia                 | -1.2%              | -1.1% | -1.6%              | -1.5% | -0.7%                        | -0.3% | -3.1%   | -3.2% | -0.2%                                         | -0.4% | -2.9%                       | -2.8% | -1.5%                     | -1.4% | 74.4%    | 21.3% | -1.8%        | -1.9% | -1.7%                       | -1.9% | 0.0%                       | 0.0%  | -0.4%                                         | 0.0%  | -0.2%                        | -0.2% | -0.6%                                 | 3.7%  | -1.1%     | -0.7% | -2.1%                   | -2.1% | -2.9%                                         |       |
| Malta                    | -0.4%              | -0.6% | -0.5%              | -0.6% | -0.8%                        | -1.0% |         |       | 0.2%                                          | 0.3%  | -0.9%                       | -0.9% | -1.3%                     | -1.4% | -0.3%    | -1.9% | -1.2%        | -1.0% | -1.6%                       | -1.8% | 0.0%                       | 0.1%  | 0.0%                                          | -0.4% | -0.1%                        | -0.2% | 0.5%                                  | 0.1%  | -0.4%     | -0.3% | -1.0%                   | -1.6% | -1.6%                                         |       |
| Mauritius                | -0.8%              | 0.0%  | -1.0%              | -0.8% | -2.1%                        | -1.2% |         |       | 0.3%                                          | 2.9%  | -0.6%                       | -0.4% | -1.5%                     | 0.4%  | 7.2%     | 32.0% | -2.1%        | -1.5% | -0.4%                       | -0.0% | 0.0%                       | 0.0%  | -0.5%                                         | -0.2% | -0.2%                        | -0.2% | -0.2%                                 | 0.6%  | -1.9%     | -1.2% | -2.2%                   | -1.6% | -2.2%                                         |       |
| Montenegro               | -0.5%              | -0.7% | -0.6%              | -0.8% | -0.6%                        | -1.5% |         |       | -1.5%                                         | -1.1% | -0.6%                       | -0.8% | -0.8%                     | -1.3% | 9.0%     | 8.8%  | -1.7%        | -2.2% | -0.4%                       | -0.6% | -0.0%                      | -0.0% | -0.2%                                         | -0.0% | -0.0%                        | 0.0%  | -0.2%                                 | -0.5% | -0.4%     | -1.0% | -1.5%                   | -2.1% | -1.8%                                         |       |
| Niue                     | -0.6%              | -0.8% | -1.4%              | -1.3% | -0.9%                        | -1.0% |         |       | 2.2%                                          | 2.9%  | -1.1%                       | -1.1% | -1.6%                     | -1.8% | 101.9%   | 48.5% | -1.9%        | -2.1% | 0.5%                        | -0.7% | -0.0%                      | -0.0% | -0.0%                                         | -0.0% | -0.1%                        | -0.1% | -0.7%                                 | -0.3% | -1.5%     | -1.5% | -1.0%                   | -0.9% | -1.9%                                         |       |
| North Macedonia          | -0.8%              | -0.8% | -0.6%              | -0.8% | -1.9%                        | -1.6% |         |       | 31.9%                                         | 48.9% | -0.7%                       | -0.7% | -1.2%                     | -1.5% | 22.7%    | 12.3% | -2.9%        | -2.7% | -0.8%                       | -1.3% | 0.0%                       | -0.0% | -0.3%                                         | 0.1%  | -0.0%                        | -0.1% | -0.4%                                 | -1.0% | -1.0%     | -0.8% | -2.7%                   | -2.3% | -2.5%                                         |       |
| Northern Mariana Islands | -0.6%              | -0.4% | -0.6%              | -0.3% | -1.6%                        | -1.0% |         |       | 3.5%                                          | 0.5%  | -0.1%                       | -0.1% | -0.2%                     | -0.4% | 19.1%    | 11.8% | -1.9%        | -2.5% | 1.4%                        | 3.7%  | 0.0%                       | 0.0%  | -0.3%                                         | -0.2% | 0.1%                         | 0.1%  | 0.4%                                  | 1.2%  | -1.3%     | -1.2% | -1.2%                   | -0.4% | -2.0%                                         |       |
| Oman                     | -1.5%              | -1.3% | -0.8%              | -1.0% | -1.2%                        | -1.5% | -3.3%   | -3.3% | 5.3%                                          | 8.3%  | -3.1%                       | -3.0% | -1.3%                     | -1.4% | 32.0%    | 24.3% | -2.6%        | -2.6% | -2.4%                       | -2.0% | -0.1%                      | -0.1% | -0.1%                                         | 0.1%  | -0.0%                        | -0.1% | -1.5%                                 | -1.6% | -2.1%     | -1.8% | -2.4%                   | -2.5% | -2.8%                                         |       |
| Palau                    | -0.7%              | -0.7% | -1.5%              | -1.6% | -0.8%                        | -0.7% |         |       | 2.5%                                          | 3.9%  | -1.6%                       | -1.6% | -1.3%                     | -0.8% | 97.8%    | 45.2% | -1.6%        | -1.9% | 0.8%                        | 2.9%  | -0.0%                      | -0.0% | -0.1%                                         | 0.1%  | -0.1%                        | -0.1% | -0.3%                                 | -0.2% | -1.3%     | -1.5% | -1.3%                   | -1.0% | -1.5%                                         |       |
| Poland                   | -0.8%              | -0.9% | -0.5%              | -0.4% | -0.7%                        | -0.4% |         |       | -2.5%                                         | -2.7% | -1.6%                       | -1.0% | -2.0%                     | -2.3% | 17.9%    | 15.8% | -2.6%        | -2.5% | -1.3%                       | -1.4% | -0.0%                      | -0.1% | 0.1%                                          | -0.1% | -0.2%                        | -0.3% | -1.1%                                 | -1.1% | -1.6%     | -1.5% | -2.8%                   | -2.9% | -2.4%                                         |       |
| Portugal                 | -0.9%              | -1.5% | -0.5%              | -0.5% | -1.8%                        | -2.2% |         |       | -1.7%                                         | -1.1% | -0.4%                       | -1.5% | -2.1%                     | -2.1% | 1.3%     | -1.9% | -2.5%        | -2.8% | -1.7%                       | -1.7% | -0.0%                      | -0.0% | -0.2%                                         | -0.2% | -0.1%                        | -0.3% | -0.5%                                 | -0.7% | -1.9%     | -2.1% | -2.7%                   | -2.8% | -2.1%                                         |       |
| Republic of Moldova      | -0.4%              | -0.7% | 0.4%               | 0.2%  | -1.6%                        | -1.1% |         |       | 2.6%                                          | 5.2%  | -0.6%                       | -0.3% | -1.6%                     | -1.6% | 22.7%    | 2.7%  | -1.4%        | -1.4% | -1.1%                       | -1.7% | -0.0%                      | -0.2% | -1.5%                                         | -0.3% | 0.0%                         | 0.0%  | 0.4%                                  | 0.8%  | 2.9%      | -2.7% | -2.8%                   | -2.9% | -2.6%                                         |       |
| Romania                  | -1.0%              | -1.0% | -0.6%              | -0.7% | -1.3%                        | -1.2% |         |       | -0.3%                                         | 2.9%  | -1.4%                       | -1.1% | -2.0%                     | -2.2% | 4.2%     | 11.8% | -1.6%        | -1.6% | -1.7%                       | -2.3% | 0.0%                       | 0.0%  | -1.0%                                         | -0.0% | -0.2%                        | -0.2% | -1.5%                                 | -1.7% | -2.6%     | -2.0% | -2.8%                   | -2.6% | -2.5%                                         |       |
| Russian Federation       | 0.3%               | -0.1% | 0.3%               | 0.2%  | 0.6%                         | 0.2%  |         |       | -0.0%                                         | 0.7%  | -1.4%                       | -2.0% | -1.1%                     | -1.5% | 10.4%    | 6.1%  | -0.5%        | -1.4% | -0.6%                       | -1.1% | -0.0%                      | 0.0%  | -0.6%                                         | -0.5% | -0.1%                        | -0.1% | 0.3%                                  | 0.1%  | -1.2%     | -0.8% | -2.7%                   | -2.8% | -2.3%                                         |       |
| Saint Kitts and Nevis    | 0.2%               | 1.0%  | -0.4%              | -0.3% | -1.4%                        | 0.3%  |         |       | 3.8%                                          | 4.0%  | -2.2%                       | -1.9% | -2.2%                     | -2.0% | 20.3%    | 9.6%  | -2.5%        | -2.1% | 0.0%                        | -0.5% | 0.0%                       | 0.2%  | -0.1%                                         | -0.7% | -0.2%                        | -0.2% | -0.3%                                 | 0.4%  | -2.7%     | -1.5% | -2.3%                   | -1.9% | -1.8%                                         |       |
| Saudi Arabia             | -1.8%              | -1.3% | -1.7%              | -1.3% | -1.2%                        | -0.5% | -3.3%   | -3.2% | 0.4%                                          | 1.5%  | -3.2%                       | -3.2% | -1.9%                     | -1.6% | 9.7%     | 10.9% | -2.6%        | -2.3% | -2.0%                       | -2.1% | -0.1%                      | -0.1% | -0.2%                                         | -0.1% | -0.0%                        | -0.0% | 0.3%                                  | -0.5% | -1.9%     | -1.3% | -2.7%                   | -2.5% | -2.9%                                         |       |
| Serbia                   | -1.0%              | -1.0% | -0.7%              | -0.7% | -2.1%                        | -1.9% |         |       | -2.0%                                         | -1.6% | -1.7%                       | -1.5% | -1.5%                     | -1.5% | -1.6%    | 0.1%  | -2.6%        | -2.8% | -1.8%                       | -2.3% | -0.0%                      | -0.0% | -0.3%                                         | 0.0%  | -0.1%                        | -0.1% | -0.9%                                 | -0.8% | -1.9%     | -1.3% | -2.7%                   | -2.6% | -2.4%                                         |       |
| Seychelles               | -0.8%              | -0.5% | -1.5%              | -1.5% | -1.0%                        | -1.0% |         |       | 1.9%                                          | 1.5%  | -2.6%                       | -2.6% | -2.5%                     | -2.3% | 34.9%    | 15.6% | -1.7%        | -1.8% | 1.5%                        | 2.7%  | 0.0%                       | 0.0%  | -1.4%                                         | 0.1%  | -0.2%                        | -0.2% | -0.3%                                 | 4.5%  | -2.0%     | -1.4% | -1.9%                   | -2.1% | -1.9%                                         |       |
| Spain                    | -1.2%              | -3.0% | -0.5%              | -0.6% | -2.3%                        | -2.6% |         |       | 0.3%                                          | 1.2%  | -0.7%                       | -0.8% | -2.0%                     | -2.2% | -3.0%    | -3.2% | -2.7%        | -3.0% | -1.5%                       | -2.2% | 0.0%                       | -0.0% | -0.6%                                         | -3.8% | -0.1%                        | -0.2% | -0.3%                                 | -0.2% | -1.6%     | -2.3% | -2.3%                   | -2.6% | -1.7%                                         |       |
| Sri Lanka                | -1.7%              | -1.6% | -1.9%              | -2.2% | -2.0%                        | -1.6% | -3.3%   | -3.3% | 4.9%                                          | 5.0%  | -3.0%                       | -3.1% | -1.9%                     | -2.1% | 6.1%     | 12.0% | -2.6%        | -2.3% | -1.7%                       | -1.3% | -0.0%                      | -0.1% | -0.3%                                         | -0.1% | -0.3%                        | -0.3% | -1.6%                                 | -0.3% | -2.0%     | -1.6% | -2.6%                   | -2.5% | -2.7%                                         |       |
| Trinidad and Tobago      | -0.3%              | -0.6% | 0.5                |       |                              |       |         |       |                                               |       |                             |       |                           |       |          |       |              |       |                             |       |                            |       |                                               |       |                              |       |                                       |       |           |       |                         |       |                                               |       |

15 to 24

| High SDI                   | Total communicable |       | Enteric infections |       | Lower respiratory infections |       | Malaria |       | Neonatal sepsis and other neonatal infections |       | Vaccine Preventable disease |       | Meningitis & Encephalitis |       | HIV/AIDS |        | Tuberculosis |       | Neglected Tropical diseases |       | Infectious skin conditions |       | Sexually transmitted infections excluding HIV |       | Upper respiratory infections |       | Other unspecified infectious diseases |       | Hepatitis |       | Rheumatic heart disease |       | Maternal sepsis and other maternal infections |
|----------------------------|--------------------|-------|--------------------|-------|------------------------------|-------|---------|-------|-----------------------------------------------|-------|-----------------------------|-------|---------------------------|-------|----------|--------|--------------|-------|-----------------------------|-------|----------------------------|-------|-----------------------------------------------|-------|------------------------------|-------|---------------------------------------|-------|-----------|-------|-------------------------|-------|-----------------------------------------------|
|                            | Female             | Male  | Female             | Male  | Female                       | Male  | Female  | Male  | Female                                        | Male  | Female                      | Male  | Female                    | Male  | Female   | Male   | Female       | Male  | Female                      | Male  | Female                     | Male  | Female                                        | Male  | Female                       | Male  | Female                                | Male  | Female    | Male  | Female                  |       |                                               |
|                            |                    |       |                    |       |                              |       |         |       |                                               |       |                             |       |                           |       |          |        |              |       |                             |       |                            |       |                                               |       |                              |       |                                       |       |           |       |                         |       |                                               |
| Andorra                    | -0.3%              | -0.3% | -0.3%              | -0.3% | -1.1%                        | -1.6% |         |       | -0.6%                                         | -0.2% | -1.3%                       | -1.3% | -0.9%                     | -1.3% | 2.8%     | 0.6%   | -2.0%        | -1.8% | -1.0%                       | -0.6% | 0.0%                       | 0.0%  | -0.2%                                         | 0.1%  | -0.0%                        | -0.1% | -0.3%                                 | -0.5% | -1.9%     | -1.6% | -1.8%                   | -1.6% |                                               |
| Australia                  | -0.3%              | -0.6% | 0.1%               | 0.3%  | -1.3%                        | -1.8% |         |       | -0.4%                                         | -0.4% | -0.7%                       | 0.8%  | -1.7%                     | -1.9% | 0.3%     | 2.9%   | -1.4%        | -1.4% | -0.3%                       | -0.5% | 0.0%                       | 0.0%  | -0.5%                                         | -0.8% | -0.0%                        | -0.1% | 0.5%                                  | 0.1%  | -0.7%     | -0.8% | -1.9%                   | -2.0% | -0.9%                                         |
| Austria                    | -0.4%              | -0.7% | -0.3%              | -0.4% | -2.0%                        | -2.2% |         |       | 1.2%                                          | 1.1%  | -0.1%                       | 0.1%  | -1.3%                     | -1.6% | -0.6%    | -1.8%  | -2.2%        | -2.0% | -0.7%                       | -1.3% | 0.0%                       | 0.0%  | -0.2%                                         | -0.2% | -0.1%                        | -0.1% | 2.0%                                  | 1.5%  | -0.6%     | -1.1% | -2.0%                   | -2.0% | -1.9%                                         |
| Belgium                    | -0.4%              | -0.6% | -0.4%              | -0.5% | -1.1%                        | -1.6% |         |       | -0.4%                                         | -0.8% | -0.3%                       | -0.5% | -1.2%                     | -1.2% | -1.8%    | -1.9%  | -1.8%        | -1.6% | -0.2%                       | -1.5% | 0.0%                       | 0.0%  | -0.3%                                         | -0.8% | -0.1%                        | -0.1% | 1.3%                                  | 0.6%  | -1.0%     | -0.9% | -0.8%                   | -1.5% | -1.9%                                         |
| Bermuda                    | -0.8%              | -1.2% | 1.6%               | 1.4%  | -1.7%                        | -1.3% |         |       | -2.0%                                         | 0.8%  | -0.4%                       | -0.4% | -2.0%                     | -2.2% | -0.4%    | 2.1%   | -2.3%        | -2.3% | -1.2%                       | -0.1% | 0.0%                       | 0.0%  | -0.4%                                         | -0.4% | -0.0%                        | -0.1% | -0.6%                                 | -0.1% | -1.7%     | -1.6% | -2.6%                   | -2.4% | -2.7%                                         |
| Brunei Darussalam          | -0.8%              | -1.6% | -0.8%              | -1.0% | 0.3%                         | -1.8% |         |       | 5.0%                                          | 5.0%  | -0.8%                       | -1.8% | -1.7%                     | -2.3% | 12.0%    | 11.2%  | -2.4%        | -2.8% | -0.7%                       | -2.2% | 0.0%                       | 0.0%  | -0.4%                                         | -0.1% | -0.0%                        | 0.0%  | 0.2%                                  | -1.1% | -1.6%     | -2.2% | -1.8%                   | -2.3% |                                               |
| Canada                     | 0.1%               | -0.4% | 0.8%               | 0.9%  | -1.3%                        | -1.8% |         |       | 3.4%                                          | -0.8% | -0.2%                       | -0.3% | -1.5%                     | -1.4% | 0.8%     | -2.7%  | -1.2%        | -1.1% | -0.6%                       | -1.2% | 0.0%                       | 0.0%  | -0.2%                                         | -0.0% | -0.1%                        | -0.1% | 0.0%                                  | -0.1% | -0.3%     | -0.5% | -1.4%                   | -1.5% | -1.8%                                         |
| Cyprus                     | -0.3%              | -0.5% | -0.7%              | -0.8% | -1.7%                        | -1.3% |         |       | 0.1%                                          | 0.2%  | -1.5%                       | -1.4% | -2.1%                     | -1.8% | 80.0%    | 10.6%  | -1.9%        | -2.4% | -1.5%                       | -2.3% | -0.0%                      | -0.0% | -0.1%                                         | 0.0%  | -0.1%                        | -0.1% | -0.4%                                 | -0.4% | -0.9%     | -1.0% | -2.2%                   | -1.9% | -3.0%                                         |
| Czechia                    | -0.5%              | -0.5% | -0.6%              | -0.7% | -1.2%                        | -0.9% |         |       | 2.8%                                          | 7.0%  | 0.1%                        | -0.1% | -1.6%                     | -1.3% | 13.8%    | 9.0%   | -2.5%        | -2.4% | -1.2%                       | -1.2% | 0.0%                       | 0.0%  | -0.3%                                         | -0.1% | -0.1%                        | -0.1% | -0.5%                                 | -0.4% | -1.1%     | -1.2% | -2.5%                   | -2.1% | -2.4%                                         |
| Denmark                    | -0.5%              | -0.6% | -0.4%              | -0.4% | -1.2%                        | -1.4% |         |       | 0.4%                                          | 0.7%  | -0.1%                       | -0.9% | -2.3%                     | -2.4% | 12.6%    | 2.4%   | -1.9%        | -1.7% | -1.0%                       | -0.3% | 0.0%                       | 0.0%  | -0.3%                                         | -0.0% | -0.1%                        | -0.1% | 0.3%                                  | 0.4%  | -1.0%     | -0.1% | -2.2%                   | -2.6% | -1.8%                                         |
| Estonia                    | 0.2%               | -0.7% | 1.2%               | -0.1% | -0.7%                        | -1.4% |         |       | -1.1%                                         | -2.8% | -0.4%                       | -0.5% | -1.9%                     | -2.3% | 407.4%   | 247.7% | -2.2%        | -2.5% | -0.4%                       | -1.4% | -0.2%                      | -0.2% | -1.1%                                         | -2.1% | -0.1%                        | -0.1% | 0.5%                                  | 0.5%  | -1.7%     | -1.1% | -2.3%                   | -3.0% | -2.5%                                         |
| Finland                    | 0.6%               | -0.8% | -0.5%              | -0.6% | -2.6%                        | -2.8% |         |       | -0.5%                                         | 0.6%  | 0.1%                        | -0.4% | -1.6%                     | -2.1% | -2.0%    | -1.8%  | -1.7%        | -1.7% | -0.9%                       | 0.0%  | 0.0%                       | 0.0%  | -0.6%                                         | -0.2% | -0.1%                        | -0.1% | -0.1%                                 | -0.4% | -0.9%     | -0.2% | -2.2%                   | -2.4% | -2.2%                                         |
| France                     | -0.6%              | -1.2% | -0.5%              | -0.5% | -1.9%                        | -2.1% |         |       | -1.3%                                         | -1.5% | -0.9%                       | -1.4% | -1.7%                     | -1.9% | -2.5%    | -3.1%  | -2.1%        | -2.2% | -1.1%                       | -2.1% | 0.0%                       | 0.0%  | -0.2%                                         | -0.8% | -0.1%                        | -0.2% | -0.1%                                 | -0.4% | -0.6%     | -1.1% | -1.6%                   | -1.9% | -1.6%                                         |
| Germany                    | -0.6%              | -0.9% | -0.2%              | -0.3% | -1.4%                        | -1.6% |         |       | -0.3%                                         | -0.2% | -0.1%                       | -0.4% | -1.7%                     | -1.7% | -2.3%    | -2.8%  | -2.3%        | -2.1% | -0.2%                       | -1.5% | 0.0%                       | 0.0%  | -0.6%                                         | -0.8% | -0.1%                        | -0.1% | -0.3%                                 | -0.5% | -1.3%     | -1.4% | -1.7%                   | -2.1% | -2.6%                                         |
| Guam                       | -0.3%              | -0.4% | -0.4%              | -0.3% | -0.5%                        | -1.1% |         |       | 0.4%                                          | 1.2%  | -0.9%                       | -0.8% | -0.2%                     | -1.2% | 15.8%    | 7.4%   | -1.0%        | -1.9% | -0.9%                       | -0.1% | 0.1%                       | 0.0%  | -0.1%                                         | -0.1% | -0.1%                        | -0.0% | 0.4%                                  | 1.0%  | -0.3%     | -0.7% | -0.9%                   | -1.1% | -1.3%                                         |
| Iceland                    | -0.5%              | -0.9% | -0.5%              | -0.5% | -1.2%                        | -2.1% |         |       | 0.3%                                          | -0.6% | 0.4%                        | 0.2%  | -1.7%                     | -2.0% | -2.4%    | -2.3%  | -2.3%        | -2.2% | -0.2%                       | -0.6% | -0.0%                      | 0.0%  | -0.2%                                         | -1.6% | -0.1%                        | -0.2% | 0.4%                                  | -0.5% | 0.2%      | -0.2% | -1.4%                   | -2.2% | -2.0%                                         |
| Ireland                    | -0.8%              | -0.7% | -0.6%              | -0.6% | -2.3%                        | -2.2% |         |       | 0.6%                                          | 1.7%  | -0.3%                       | -0.5% | -2.4%                     | -2.1% | 0.2%     | -1.3%  | -1.8%        | -2.1% | -1.7%                       | 0.5%  | 0.0%                       | 0.0%  | -0.2%                                         | -0.2% | -0.1%                        | -0.2% | -0.1%                                 | -0.2% | -0.4%     | 0.0%  | -2.4%                   | -2.1% | -1.3%                                         |
| Japan                      | -0.5%              | -0.7% | -0.8%              | -0.8% | -1.9%                        | -2.0% |         |       | -0.7%                                         | -0.5% | -1.3%                       | -1.3% | -1.6%                     | -1.7% | 6.8%     | 5.8%   | -2.1%        | -2.2% | -1.2%                       | -0.7% | -0.0%                      | 0.0%  | 0.6%                                          | -0.0% | -0.1%                        | -0.1% | -0.6%                                 | -0.2% | -1.1%     | -1.5% | -1.8%                   | -2.1% | -1.2%                                         |
| Kuwait                     | -1.0%              | -0.9% | -0.3%              | -0.5% | -1.2%                        | -1.1% |         |       | -1.9%                                         | -0.1% | -0.8%                       | -0.6% | -1.5%                     | -1.5% | 0.0%     | -1.3%  | -2.7%        | -2.6% | -0.8%                       | -0.8% | -0.0%                      | 0.0%  | -0.2%                                         | -0.3% | -0.0%                        | -0.0% | -0.7%                                 | -0.2% | -1.6%     | -1.8% | -2.9%                   | -2.6% | -1.9%                                         |
| Latvia                     | -0.7%              | -0.9% | -0.3%              | -0.3% | -0.7%                        | -1.1% |         |       | -2.0%                                         | 1.3%  | 0.7%                        | 0.8%  | -1.9%                     | -2.1% | 9.2%     | 2.1%   | -2.3%        | -2.2% | -0.7%                       | -0.5% | -0.0%                      | 0.0%  | -0.4%                                         | -0.6% | -0.1%                        | -0.1% | 0.8%                                  | 0.4%  | -2.3%     | -1.9% | -2.8%                   | -3.0% | -2.5%                                         |
| Lithuania                  | -0.2%              | -0.5% | 0.5%               | -0.2% | 0.3%                         | 0.2%  |         |       | 3.1%                                          | 6.1%  | -0.1%                       | -0.2% | -1.7%                     | -1.8% | 0.8%     | 19.7%  | -1.8%        | -2.0% | -0.4%                       | -1.1% | 0.1%                       | 0.0%  | -0.3%                                         | -0.6% | -0.1%                        | -0.1% | 0.5%                                  | 0.1%  | -1.2%     | -0.5% | -2.8%                   | -2.9% | -2.5%                                         |
| Luxembourg                 | -0.4%              | -1.1% | -0.3%              | -0.4% | -1.4%                        | -2.2% |         |       | -0.2%                                         | 0.1%  | -1.0%                       | -1.8% | -1.3%                     | -2.1% | -1.4%    | -2.7%  | -1.8%        | -2.2% | -1.0%                       | -1.3% | 0.0%                       | 0.0%  | -0.4%                                         | -2.5% | -0.1%                        | -0.2% | -0.1%                                 | -0.6% | -0.6%     | -1.6% | -2.4%                   | -2.4% |                                               |
| Monaco                     | -0.3%              | -0.6% | -0.3%              | -0.3% | -0.8%                        | -0.9% |         |       | -0.5%                                         | 0.3%  | -0.3%                       | -0.1% | -1.3%                     | -1.5% | 0.2%     | -1.6%  | -2.0%        | -2.2% | -0.4%                       | -0.6% | 0.0%                       | 0.0%  | -0.4%                                         | -0.3% | -0.1%                        | -0.1% | 1.4%                                  | 0.6%  | 0.1%      | -0.1% | -1.0%                   | -1.4% | -2.0%                                         |
| Netherlands                | -0.4%              | -0.6% | -0.3%              | -0.3% | -1.1%                        | -1.2% |         |       | -0.4%                                         | -0.8% | -0.1%                       | 0.1%  | -1.8%                     | -1.8% | -1.3%    | -2.8%  | -1.9%        | -1.9% | -0.8%                       | 1.5%  | 0.0%                       | 0.0%  | -0.4%                                         | -0.2% | -0.1%                        | -0.2% | 0.8%                                  | 0.6%  | -0.1%     | 0.1%  | -1.6%                   | -1.8% | -1.6%                                         |
| New Zealand                | -0.5%              | -0.8% | 0.1%               | -0.2% | -2.4%                        | -2.5% |         |       | 2.0%                                          | 2.0%  | -0.5%                       | -0.9% | -1.5%                     | -1.5% | -1.9%    | -2.7%  | -1.8%        | -1.8% | 0.3%                        | -1.3% | -0.0%                      | -0.0% | 0.5%                                          | -0.1% | -0.1%                        | -0.1% | 0.4%                                  | -0.2% | -0.9%     | -0.6% | -2.2%                   | -2.3% | -1.2%                                         |
| Norway                     | -0.6%              | -1.0% | -0.5%              | -0.3% | -2.4%                        | -2.3% |         |       | -0.1%                                         | -0.0% | -0.0%                       | -0.1% | -2.3%                     | -2.2% | 6.8%     | -2.4%  | -1.8%        | -2.2% | -0.5%                       | 0.1%  | -0.0%                      | 0.0%  | -0.3%                                         | 0.7%  | -0.1%                        | -0.2% | 0.7%                                  | 0.9%  | -0.4%     | -0.3% | -2.3%                   | -2.4% | -2.2%                                         |
| Puerto Rico                | -1.1%              | -1.1% | 1.6%               | 1.7%  | -2.1%                        | -1.8% |         |       | 0.1%                                          | 2.9%  | -1.8%                       | -0.7% | -2.3%                     | -2.4% | -2.5%    | -2.7%  | -2.5%        | -2.4% | -1.2%                       | -0.3% | -0.0%                      | 0.0%  | -0.2%                                         | 0.1%  | -0.1%                        | -0.1% | 0.5%                                  | 1.0%  | -1.8%     | -1.5% | -2.6%                   | -1.3% | -2.6%                                         |
| Qatar                      | -1.4%              | -1.2% | -1.3%              | -1.4% | -1.5%                        | -1.5% |         |       | 1.8%                                          | 4.0%  | -3.0%                       | -2.9% | -1.8%                     | -1.4% | -1.8%    | -0.0%  | -2.7%        | -2.5% | -1.5%                       | -2.0% | -0.0%                      | -0.1% | -0.1%                                         | 0.1%  | -0.1%                        | -0.1% | -1.0%                                 | -1.0% | -1.1%     | -1.5% | -2.7%                   | -2.8% | -2.9%                                         |
| Republic of Korea          | -1.9%              | -1.9% | -1.6%              | -2.0% | -2.8%                        | -2.7% | -3.2%   | -3.2% | 0.1%                                          | 2.3%  | -1.8%                       | -1.9% | -2.5%                     | -2.6% | 0.7%     | 1.2%   | -3.1%        | -3.2% | -1.9%                       | -1.1% | -0.1%                      | -0.1% | -0.8%                                         | -0.1% | -0.2%                        | -0.3% | -1.9%                                 | -1.9% | -2.7%     | -2.6% | -2.8%                   | -2.7% | -3.2%                                         |
| San Marino                 | -0.1%              | -0.4% | -0.4%              | -0.4% | 1.1%                         | -0.9% |         |       | -0.2%                                         | 0.2%  | 0.4%                        | 0.4%  | -0.6%                     | -0.6% | 0.4%     | -1.7%  | -1.7%        | -1.9% | -0.3%                       | -0.5% | 0.0%                       | 0.0%  | -0.1%                                         | 0.0%  | -0.0%                        | -0.1% | 0.7%                                  | 0.1%  | -0.5%     | -1.3% | -0.7%                   | -1.0% | -1.7%                                         |
| Singapore                  | -1.0%              | -1.2% | -1.9%              | -1.8% | -1.9%                        | -1.9% |         |       | 5.7%                                          | 4.1%  | -0.7%                       | -1.1% | -2.1%                     | -1.9% | 2.3%     | 2.0%   | -2.6%        | -2.6% | -0.8%                       | -0.4% | 0.0%                       | 0.0%  | -0.6%                                         | -0.3% | -0.1%                        | -0.2% | -1.4%                                 | -1.3% | -1.4%     | -1.6% | -2.9%                   | -2.7% | -2.7%                                         |
| Slovakia                   | -1.0%              | -1.0% | -0.8%              | -0.8% | -2.0%                        | -2.1% |         |       | -0.1%                                         | 1.9%  | 0.2%                        | 0.1%  | -1.6%                     | -1.2% | 18.5%    | 13.9%  | -2.5%        | -2.5% | -1.0%                       | -1.1% | -0.0%                      | 0.0%  | -0.2%                                         | 0.2%  | -0.1%                        | -0.2% | -0.2%                                 | -0.5% | -0.8%     | -1.2% | -1.7%                   | -2.1% | -2.1%                                         |
| Slovenia                   | -0.6%              | -0.5% | -0.6%              | -0.6% | -1.7%                        | -1.8% |         |       | -0.5%                                         | 1.3%  | 0.1%                        | -0.2% | -1.5%                     | -1.4% | -1.6%    | -1.5%  | -2.4%        | -2.3% | -1.3%                       | -2.0% | 0.0%                       | 0.0%  | -0.3%                                         | -0.2% | -0.1%                        | -0.1% | -0.0%                                 | 0.2%  | -1.1%     | -1.0% | -1.8%                   | -2.3% | -2.3%                                         |
| Sweden                     | -0.4%              | -0.6% | -0.3%              | -0.3% | -2.0%                        | -2.2% |         |       | -0.5%                                         | -0.8% | -0.0%                       | -0.1% | -1.7%                     | -1.7% | 0.2%     | -2.3%  | -1.6%        | -1.7% | 0.3%                        | -0.6% | 0.0%                       | 0.0%  | -0.4%                                         | -0.6% | -0.1%                        | -0.1% | 1.0%                                  | 0.3%  | -1.0%     | -0.4% | -2.2%                   | -2.2% | -1.9%                                         |
| Switzerland                | -0.7%              | -1.0% | -0.3%              | -0.3% | -2.5%                        | -2.6% |         |       | -2.2%                                         | 0.4%  | -2.3%                       | -1.8% | -2.5%                     | -2.7% | -0.3%    | -1.7%  | -2.1%        | -1.5% | 1.1%                        | -1.2% | 0.0%                       | 0.0%  | -0.1%                                         | -0.2% | -0.0%                        | -0.1% | 0.4%                                  | -0.5% | -1.4%     | -1.3% | -2.2%                   | -2.7% | -2.0%                                         |
| Taiwan (Province of China) | -0.7%              | -0.8% | -0.5%              | -0.4% | -1.6%                        | -1.5% |         |       | 9.6%                                          | 8.1%  | -0.9%                       | -1.0% | -1.9%                     | -2.1% | 9.6%     | 35.2%  | -1.7%        | -1.7% | -1.4%                       | -1.3% | 0.0%                       | 0.0%  | -0.6%                                         | 0.0%  | -0.3%                        | -0.4% | -0.1%                                 | 1.0%  | -1.5%     | -2.0% | -2.8%                   | -2.8% | -2.5%                                         |
| United Arab Emirates       | -0.9%              | -0.9% | -0.7%              | -0.7% | -1.3%                        | -1.2% | -3.3%   | -3.3% | 1.7%                                          | 6.3%  | -2.8%                       | -2.7% | -1.6%                     | -1.6% | 34.3%    | 16.8%  | -2.4%        | -2.4% | -0.2%                       | -1.2% | 0.0%                       | 0.0%  | -0.3%                                         | -0.2% | 0.1%                         | 0.1%  | -0.0%                                 | -0.5% | -1.4%     | -1.4% | -0.7%                   | -1.3% | -2.9%                                         |
| United Kingdom             | -0.4%              | -0.7% | -0.4%              | -0.4% | -1.1%                        | -1.5% |         |       | -0.0%                                         | 0.2%  | -1.0%                       | -0.9% | -1.7%                     | -1.8% | 2.6%     | -2.1%  | -1.7%        | -1.8% | -1.0%                       | -1.3% | 0.1%                       | 0.0%  | 0.6%                                          | -0.6% | -0.1%                        | -0.1% | -0.2%                                 | -0.6% | 0.5%      | 0.7%  | -2.2%                   | -2.2% | -1.6%                                         |
| United States of America   | -0.5%              | -1.0% | 1.2%               | 1.0%  | -1.1%                        | -1.1% |         |       | -0.8%                                         | -1.0% |                             |       |                           |       |          |        |              |       |                             |       |                            |       |                                               |       |                              |       |                                       |       |           |       |                         |       |                                               |

**S15. (A)** Percentage change in DALYs/100,000 for each communicable condition for each location for 0-24 year old age group by sex. The colours on this heat map are green for values less than 0, the darker the green the greater the reduction in DALYs/100,000 between 1990 and 2019, the orange tones represent positive numbers, an increase in DALYs/ 100,000, with darker shades indicating worse outcome.

|                             |                          | 0 to 24 years, percentage change in DALYs/100,000, for males and females, 1990 to 2019 |       |                    |       |                              |       |         |       |                                               |       |                             |       |                           |        |          |          |              |       |                             |       |                            |       |                                               |       |                              |       |                                       |       |           |       |                         |       |                                               |      |
|-----------------------------|--------------------------|----------------------------------------------------------------------------------------|-------|--------------------|-------|------------------------------|-------|---------|-------|-----------------------------------------------|-------|-----------------------------|-------|---------------------------|--------|----------|----------|--------------|-------|-----------------------------|-------|----------------------------|-------|-----------------------------------------------|-------|------------------------------|-------|---------------------------------------|-------|-----------|-------|-------------------------|-------|-----------------------------------------------|------|
|                             |                          | Total communicable                                                                     |       | Enteric infections |       | Lower respiratory infections |       | Malaria |       | Neonatal sepsis and other neonatal infections |       | Vaccine Preventable disease |       | Meningitis & Encephalitis |        | HIV/AIDS |          | Tuberculosis |       | Neglected Tropical diseases |       | Infectious skin conditions |       | Sexually transmitted infections excluding HIV |       | Upper respiratory infections |       | Other unspecified infectious diseases |       | Hepatitis |       | Rheumatic heart disease |       | Maternal sepsis and other maternal infections |      |
|                             |                          | Female                                                                                 | Male  | Female             | Male  | Female                       | Male  | Female  | Male  | Female                                        | Male  | Female                      | Male  | Female                    | Male   | Female   | Male     | Female       | Male  | Female                      | Male  | Female                     | Male  | Female                                        | Male  | Female                       | Male  | Female                                | Male  | Female    | Male  | Female                  | Male  | Female                                        | Male |
| Low SDI                     | Afghanistan              | -2.6%                                                                                  | -2.6% | -2.3%              | -1.8% | -2.6%                        | -2.7% | 0.1%    | 0.4%  | -0.3%                                         | -0.5% | 3.0%                        | -3.0% | -2.6%                     | -2.6%  | 8.3%     | 7.5%     | -2.7%        | -2.8% | -1.7%                       | -2.1% | 0.0%                       | -0.0% | -0.5%                                         | -0.4% | -0.2%                        | -0.2% | -1.6%                                 | -1.8% | -2.6%     | -2.6% | -2.1%                   | -1.9% | -2.2%                                         |      |
|                             | Benin                    | -2.0%                                                                                  | -2.0% | -2.3%              | -2.4% | -2.3%                        | -2.3% | -0.8%   | -0.7% | -1.4%                                         | -1.4% | -2.6%                       | -2.6% | -2.3%                     | -2.1%  | 15.8%    | 19.0%    | -2.5%        | -2.4% | -2.2%                       | -2.2% | -0.4%                      | -0.3% | -1.8%                                         | -1.7% | -0.5%                        | -0.5% | -1.0%                                 | -1.0% | -1.5%     | -2.4% | -1.6%                   | -1.5% | -2.1%                                         |      |
|                             | Burkina Faso             | -2.0%                                                                                  | -2.0% | -2.3%              | -2.3% | -1.6%                        | -1.6% | -1.4%   | -1.5% | -1.0%                                         | -1.0% | -2.9%                       | -2.9% | -1.9%                     | -1.8%  | -3.1%    | -2.9%    | 1.6%         | -1.6% | -2.0%                       | -2.2% | 0.1%                       | -0.1% | -1.0%                                         | -1.0% | -0.5%                        | -0.6% | -0.3%                                 | -0.4% | -1.3%     | -2.2% | -0.6%                   | -0.8% | -2.0%                                         |      |
|                             | Burundi                  | -2.4%                                                                                  | -2.4% | -2.0%              | -1.3% | -2.4%                        | -2.6% | -2.5%   | -2.6% | -1.0%                                         | -1.2% | -3.1%                       | -3.1% | -2.4%                     | -2.4%  | -3.0%    | -2.8%    | -2.3%        | -2.3% | -2.1%                       | -2.0% | -0.3%                      | -0.3% | -1.8%                                         | -1.9% | -2.0%                        | -2.0% | -2.2%                                 | -2.4% | -1.5%     | -1.5% | -1.6%                   | -1.6% | -0.9%                                         |      |
|                             | Central African Republic | -1.6%                                                                                  | -1.5% | -1.6%              | -1.4% | -1.7%                        | -1.6% | -0.7%   | -0.6% | -0.4%                                         | -0.3% | -2.3%                       | -2.2% | -2.0%                     | -1.9%  | -2.1%    | -1.8%    | -1.2%        | -1.0% | -2.6%                       | -2.7% | -0.2%                      | -0.1% | -1.2%                                         | -0.9% | -1.5%                        | -1.1% | -1.2%                                 | -1.0% | -1.3%     | -1.8% | -0.8%                   | -0.7% | 0.3%                                          |      |
|                             | Chad                     | -1.7%                                                                                  | -1.6% | -1.1%              | -1.1% | -1.6%                        | -1.6% | -1.7%   | -1.8% | -1.4%                                         | -1.2% | -2.6%                       | -2.6% | -1.3%                     | -1.1%  | 0.7%     | 1.5%     | -1.7%        | -1.5% | -1.4%                       | -1.6% | -0.2%                      | -0.1% | -1.5%                                         | -1.5% | -0.4%                        | -0.5% | -1.3%                                 | -1.5% | -0.7%     | -1.6% | -1.3%                   | -1.4% | -1.5%                                         |      |
|                             | Côte d'Ivoire            | -2.1%                                                                                  | -2.1% | -2.3%              | -2.4% | -2.1%                        | -2.1% | -1.5%   | -1.7% | -1.4%                                         | -1.3% | -3.0%                       | -3.0% | -2.3%                     | -2.3%  | -2.2%    | -1.7%    | -2.0%        | -2.0% | -2.4%                       | -2.3% | -0.3%                      | -0.2% | -1.9%                                         | -1.9% | -0.3%                        | -0.4% | -1.2%                                 | -1.5% | -1.5%     | -2.3% | -1.2%                   | -1.3% | -1.7%                                         |      |
|                             | Dem Rep of the Congo     | -2.5%                                                                                  | -2.4% | -2.4%              | -1.9% | -2.7%                        | -2.8% | -2.3%   | -2.4% | -1.3%                                         | -1.3% | -2.8%                       | -2.9% | -2.6%                     | -2.6%  | -2.7%    | -2.5%    | -2.6%        | -2.7% | -2.1%                       | -2.4% | -0.5%                      | -0.3% | -2.1%                                         | -2.1% | -1.8%                        | -2.0% | -1.9%                                 | -2.2% | -1.9%     | -2.4% | -1.3%                   | -1.0% | 0.3%                                          |      |
|                             | Eritrea                  | -2.6%                                                                                  | -2.6% | -2.5%              | -2.5% | -2.6%                        | -2.7% | -2.7%   | -2.7% | -1.3%                                         | -1.3% | -3.2%                       | -3.2% | -2.4%                     | -2.3%  | -1.3%    | -0.6%    | -2.5%        | -2.2% | -2.6%                       | -2.8% | -0.3%                      | -0.2% | -1.9%                                         | -1.9% | -2.1%                        | -2.0% | -1.4%                                 | -2.5% | -1.6%     | -1.2% | -1.4%                   | -1.4% | -1.8%                                         |      |
|                             | Ethiopia                 | -2.7%                                                                                  | -2.7% | -2.7%              | -2.6% | -2.9%                        | -2.9% | -0.4%   | -0.2% | -1.3%                                         | -1.5% | -3.1%                       | -3.1% | -2.8%                     | -2.8%  | -1.6%    | -1.2%    | -2.9%        | -2.9% | -2.8%                       | -2.9% | -0.6%                      | -0.4% | -2.7%                                         | -2.7% | -2.6%                        | -2.5% | -2.1%                                 | -2.2% | -2.2%     | -2.1% | -1.9%                   | -2.0% | -2.6%                                         |      |
|                             | Gambia                   | -2.6%                                                                                  | -2.6% | -2.4%              | -2.4% | -2.6%                        | -2.7% | -3.0%   | -2.9% | -1.7%                                         | -1.7% | -3.1%                       | -3.1% | -2.5%                     | -2.5%  | 16.8%    | 17.6%    | -2.3%        | -2.0% | -1.7%                       | -1.9% | -0.3%                      | -0.2% | -1.7%                                         | -1.8% | -0.4%                        | -0.4% | -1.0%                                 | -1.4% | -1.3%     | -0.9% | -1.3%                   | -1.3% | -1.4%                                         |      |
|                             | Guinea                   | -2.3%                                                                                  | -2.2% | -2.4%              | -2.3% | -2.5%                        | -2.4% | -1.4%   | -1.2% | -1.6%                                         | -1.5% | -2.9%                       | -2.8% | -2.0%                     | -1.7%  | 7.4%     | 8.0%     | -2.5%        | -2.3% | -1.5%                       | -1.6% | -0.5%                      | -0.3% | -1.9%                                         | -1.8% | -0.6%                        | -0.5% | -1.5%                                 | -1.7% | -1.5%     | -1.8% | -1.7%                   | -1.7% | -1.5%                                         |      |
|                             | Guinea-Bissau            | -2.5%                                                                                  | -2.5% | -2.3%              | -2.4% | -2.6%                        | -2.8% | -2.7%   | -2.7% | -1.7%                                         | -1.6% | -2.7%                       | -2.7% | -2.6%                     | -2.7%  | 7.3%     | 10.4%    | -2.7%        | -2.6% | -1.7%                       | -2.2% | -0.4%                      | -0.3% | -2.3%                                         | -2.3% | -0.6%                        | -0.6% | -1.2%                                 | -1.8% | -1.8%     | -2.5% | -1.9%                   | -2.0% | -2.3%                                         |      |
|                             | Haiti                    | -2.3%                                                                                  | -2.3% | -2.6%              | -2.6% | -2.4%                        | -2.3% | -1.9%   | -1.9% | -0.1%                                         | -0.5% | -2.6%                       | -2.4% | -2.4%                     | -2.3%  | -1.8%    | -1.6%    | -2.5%        | -2.8% | -1.2%                       | -1.4% | -0.3%                      | -0.3% | -0.8%                                         | -1.0% | -1.2%                        | -1.4% | -0.5%                                 | -0.8% | -2.4%     | -2.3% | -1.9%                   | -1.8% | -0.6%                                         |      |
|                             | Liberia                  | -2.7%                                                                                  | -2.7% | -2.7%              | -2.6% | -3.0%                        | -3.1% | -2.2%   | -2.3% | -2.1%                                         | -2.1% | -3.2%                       | -3.2% | -2.9%                     | -3.0%  | 3.2%     | 4.0%     | -2.9%        | -3.0% | -1.7%                       | -2.0% | -0.8%                      | -0.6% | -1.2%                                         | -1.2% | -0.5%                        | -0.5% | -2.2%                                 | -2.5% | -2.0%     | -2.7% | -1.8%                   | -2.0% | -1.0%                                         |      |
|                             | Madagascar               | -2.3%                                                                                  | -2.3% | -2.3%              | -2.1% | -2.5%                        | -2.6% | -2.0%   | -2.2% | -1.2%                                         | -1.4% | -3.7%                       | -2.7% | -2.6%                     | -2.6%  | 733.7%   | 633.6%   | -2.5%        | -2.5% | -1.7%                       | -2.4% | -0.3%                      | -0.2% | -1.2%                                         | -1.2% | -1.9%                        | -2.1% | -1.3%                                 | -1.7% | -1.9%     | -2.2% | -1.8%                   | -1.7% | -1.6%                                         |      |
|                             | Malawi                   | -2.8%                                                                                  | -2.7% | -3.0%              | -2.9% | -2.7%                        | -2.6% | -2.8%   | -2.9% | -1.7%                                         | -1.6% | -3.1%                       | -3.1% | -2.8%                     | -2.7%  | -2.3%    | -2.0%    | -2.7%        | -2.5% | -2.6%                       | -2.7% | -0.4%                      | -0.2% | -1.3%                                         | -1.2% | -2.4%                        | -2.4% | -1.6%                                 | -1.9% | -2.3%     | -2.4% | -1.6%                   | -1.3% | -1.6%                                         |      |
|                             | Mali                     | -2.3%                                                                                  | -2.2% | -2.7%              | -2.3% | -1.3%                        | -1.8% | -2.3%   | -2.2% | -1.1%                                         | -1.2% | -2.9%                       | -2.8% | -2.5%                     | -1.6%  | 2.2%     | 3.6%     | -2.0%        | -2.1% | -1.9%                       | -2.1% | -0.3%                      | -0.2% | -1.0%                                         | -1.1% | -0.8%                        | -0.6% | -1.3%                                 | -0.9% | -2.0%     | -2.7% | -1.8%                   | -1.6% | -2.3%                                         |      |
|                             | Mozambique               | -2.4%                                                                                  | -2.4% | -2.9%              | -3.0% | -2.6%                        | -2.7% | -3.6%   | -2.4% | -1.2%                                         | -1.1% | -3.2%                       | -3.1% | -2.7%                     | -2.6%  | 23.8%    | 24.3%    | -2.6%        | -2.3% | -2.2%                       | -2.4% | -0.2%                      | -0.1% | -2.5%                                         | -2.5% | -2.5%                        | -2.3% | -0.8%                                 | -1.3% | -2.2%     | -2.4% | -1.3%                   | -0.8% | -2.5%                                         |      |
|                             | Nepal                    | -3.0%                                                                                  | -2.9% | -3.0%              | -3.0% | -3.0%                        | -3.0% | -3.3%   | -3.3% | -1.4%                                         | -1.6% | -3.2%                       | -3.2% | -2.9%                     | -2.8%  | 7,661.3% | 8,453.9% | -3.1%        | -2.9% | -2.4%                       | -2.8% | -0.1%                      | -0.1% | -1.9%                                         | -1.7% | -1.6%                        | -1.3% | -0.8%                                 | -1.5% | -2.8%     | -2.5% | -2.1%                   | -1.2% | -3.1%                                         |      |
| Niger                       | -2.3%                    | -2.3%                                                                                  | -2.4% | -2.4%              | -2.4% | -2.5%                        | -1.9% | -1.7%   | -1.1% | -1.0%                                         | -3.4% | -2.3%                       | -2.6% | -2.5%                     | 1.0%   | -0.5%    | -2.7%    | -2.6%        | -1.8% | -2.0%                       | -0.5% | -0.4%                      | -2.1% | -2.0%                                         | -0.8% | -0.5%                        | -1.6% | -1.7%                                 | -1.9% | -2.3%     | -2.0% | -2.0%                   | -1.4% |                                               |      |
| Pakistan                    | -2.3%                    | -2.3%                                                                                  | -2.1% | -2.2%              | -1.9% | -2.1%                        | -2.6% | -2.6%   | -1.1% | -1.4%                                         | -3.1% | -3.1%                       | -2.1% | -2.1%                     | 19.1%  | 20.9%    | -2.3%    | -1.7%        | -2.1% | -2.0%                       | -0.0% | -0.0%                      | -1.6% | -1.5%                                         | -1.1% | -0.9%                        | -1.0% | -1.1%                                 | -2.1% | -1.8%     | -0.7% | 0.3%                    | -2.3% |                                               |      |
| Papua New Guinea            | -1.4%                    | -1.5%                                                                                  | -1.6% | -1.5%              | -1.2% | -1.4%                        | -1.8% | -1.8%   | 0.4%  | 0.3%                                          | -2.1% | -2.2%                       | -1.9% | -2.0%                     | 737.7% | 760.6%   | -1.8%    | -1.8%        | -1.4% | -1.5%                       | 0.0%  | -0.0%                      | -0.6% | -0.6%                                         | -0.1% | -0.2%                        | 0.1%  | 0.3%                                  | -1.8% | -2.1%     | -0.3% | -0.2%                   | -1.9% |                                               |      |
| Rwanda                      | -2.8%                    | -2.8%                                                                                  | -3.0% | -3.0%              | -2.7% | -2.9%                        | -2.7% | -2.8%   | -1.5% | -1.6%                                         | -3.1% | -3.1%                       | -2.7% | -2.7%                     | -2.2%  | -1.9%    | -2.9%    | -2.8%        | -2.2% | -2.2%                       | -0.5% | -0.5%                      | -1.8% | -1.7%                                         | -1.8% | -1.9%                        | -2.3% | -2.6%                                 | -2.1% | -2.4%     | -1.9% | -2.0%                   | -2.5% |                                               |      |
| Senegal                     | -2.5%                    | -2.6%                                                                                  | -2.6% | -2.7%              | -2.5% | -2.6%                        | -2.4% | -2.4%   | -1.5% | -1.7%                                         | -2.9% | -2.9%                       | -2.6% | -2.6%                     | 0.7%   | 1.2%     | -2.6%    | -2.5%        | -1.7% | -2.0%                       | -0.4% | -0.3%                      | -1.9% | -2.0%                                         | -0.5% | -0.4%                        | -1.3% | -1.5%                                 | -2.1% | -2.1%     | -1.5% | -1.8%                   | -1.9% |                                               |      |
| Sierra Leone                | -2.3%                    | -2.3%                                                                                  | -2.7% | -2.7%              | -2.4% | -2.4%                        | -1.8% | -1.6%   | -1.5% | -1.5%                                         | -2.8% | -2.9%                       | -2.4% | -2.4%                     | 9.8%   | 8.4%     | -2.4%    | -2.4%        | -2.1% | -2.2%                       | -0.4% | -0.3%                      | -1.8% | -1.7%                                         | -0.6% | -0.6%                        | -1.2% | -1.5%                                 | -1.4% | -2.5%     | -1.6% | -1.8%                   | -0.3% |                                               |      |
| Solomon Islands             | -1.8%                    | -1.9%                                                                                  | -2.2% | -2.4%              | -2.1% | -2.0%                        | -2.1% | -1.9%   | -1.0% | -1.1%                                         | -2.9% | -2.9%                       | -2.1% | -2.1%                     | 4.8%   | 3.6%     | -1.5%    | -1.8%        | -1.1% | -0.6%                       | -0.0% | -0.0%                      | -0.2% | -0.1%                                         | -0.1% | -0.1%                        | -0.8% | -0.9%                                 | -1.7% | -2.2%     | -0.8% | -0.8%                   | -1.0% |                                               |      |
| Somalia                     | -2.0%                    | -2.0%                                                                                  | -1.9% | -1.3%              | -1.8% | -1.9%                        | -2.5% | -2.6%   | -0.4% | -0.5%                                         | -2.3% | -2.3%                       | -1.2% | -1.0%                     | 51.5%  | 59.4%    | -1.4%    | -1.2%        | -3.0% | -3.1%                       | -0.2% | -0.2%                      | -0.7% | -0.6%                                         | -1.8% | -1.3%                        | -2.1% | -2.3%                                 | -0.8% | -0.5%     | -1.1% | -0.7%                   | 0.6%  |                                               |      |
| South Sudan                 | -1.3%                    | -1.8%                                                                                  | -1.4% | -1.2%              | -2.0% | -2.0%                        | -1.2% | -1.0%   | -0.8% | -0.8%                                         | -2.7% | -2.7%                       | -1.7% | -1.6%                     | 9.6%   | 10.0%    | -1.9%    | -1.8%        | -2.6% | -2.6%                       | -0.2% | -0.1%                      | -0.7% | -0.6%                                         | -1.8% | -1.6%                        | -2.3% | -2.4%                                 | -1.1% | -0.6%     | -1.3% | -1.0%                   | -1.0% |                                               |      |
| Togo                        | -2.1%                    | -2.1%                                                                                  | -2.1% | -2.1%              | -2.3% | -2.3%                        | -1.8% | -1.9%   | -1.6% | -1.6%                                         | -3.0% | -3.0%                       | -2.4% | -2.3%                     | 1.9%   | 3.3%     | -2.3%    | -2.1%        | -3.0% | -2.1%                       | -0.3% | -0.2%                      | -2.2% | -2.2%                                         | -0.2% | -0.2%                        | -1.1% | -1.5%                                 | -1.7% | -2.4%     | -1.5% | -1.4%                   | -1.9% |                                               |      |
| Uganda                      | -2.6%                    | -2.6%                                                                                  | -2.8% | -2.8%              | -2.3% | -2.5%                        | -2.6% | -2.6%   | -1.2% | -1.5%                                         | -2.7% | -2.7%                       | -2.5% | -2.6%                     | -3.0%  | -3.0%    | -2.2%    | -2.3%        | -2.0% | -2.3%                       | -0.2% | -0.1%                      | 1.2%  | 1.3%                                          | -1.9% | -2.1%                        | -2.2% | -2.4%                                 | -1.2% | -1.1%     | -0.5% | -0.7%                   | -1.3% |                                               |      |
| United Republic of Tanzania | -2.5%                    | -2.5%                                                                                  | -2.9% | -2.8%              | -2.4% | -2.6%                        | -2.5% | -2.6%   | -0.9% | -0.9%                                         | -2.7% | -2.8%                       | -2.3% | -2.3%                     | -2.8%  | -2.6%    | -2.2%    | -2.2%        | -2.3% | -2.5%                       | -0.3% | -0.2%                      | -2.2% | -2.2%                                         | -1.7% | -1.8%                        | -1.0% | -1.3%                                 | -1.7% | -1.9%     | -1.1% | -1.2%                   | -2.0% |                                               |      |
| Yemen                       | -2.7%                    | -2.8%                                                                                  | -2.7% | -2.7%              | -2.8% | -2.8%                        | -2.5% | -2.5%   | -1.2% | -1.2%                                         | -3.1% | -3.1%                       | -2.6% | -2.6%                     | 3.7%   | 3.8%     | -2.8%    | -2.8%        | -1.9% | -2.3%                       | -0.1% | -0.1%                      | -1.1% | -1.0%                                         | -0.4% | -0.5%                        | -0.1% | -0.7%                                 | -2.9% | -3.1%     | -2.1% | -1.7%                   | -1.3% |                                               |      |



0 to 24 years, percentage change in DALYs/100,000, for males and females, 1990 to 2019

|                                       | Total communicable |       | Enteric infections |       | Lower respiratory infections |       | Malaria |        | Neonatal sepsis and other neonatal infections |       | Vaccine Preventable disease |       | Meningitis & Encephalitis |       | HIV/AIDS |          | Tuberculosis |       | Neglected Tropical diseases |       | Infectious skin conditions |       | Sexually transmitted infections excluding HIV |       | Upper respiratory infections |       | Other unspecified infectious diseases |       | Hepatitis |       | Rheumatic heart disease |       | Maternal sepsis and other maternal infections |
|---------------------------------------|--------------------|-------|--------------------|-------|------------------------------|-------|---------|--------|-----------------------------------------------|-------|-----------------------------|-------|---------------------------|-------|----------|----------|--------------|-------|-----------------------------|-------|----------------------------|-------|-----------------------------------------------|-------|------------------------------|-------|---------------------------------------|-------|-----------|-------|-------------------------|-------|-----------------------------------------------|
|                                       | Female             | Male  | Female             | Male  | Female                       | Male  | Female  | Male   | Female                                        | Male  | Female                      | Male  | Female                    | Male  | Female   | Male     | Female       | Male  | Female                      | Male  | Female                     | Male  | Female                                        | Male  | Female                       | Male  | Female                                | Male  | Female    | Male  | Female                  |       |                                               |
|                                       |                    |       |                    |       |                              |       |         |        |                                               |       |                             |       |                           |       |          |          |              |       |                             |       |                            |       |                                               |       |                              |       |                                       |       |           |       |                         |       |                                               |
| Angola                                | -2.7%              | -2.7% | -2.9%              | -3.0% | -2.9%                        | -2.9% | -1.7%   | -1.3%  | -1.7%                                         | -1.1% | -2.8%                       | -2.7% | -2.7%                     | -2.6% | 28.4%    | 25.8%    | -2.9%        | -2.9% | -2.9%                       | -3.0% | -0.4%                      | -0.2% | -1.7%                                         | -1.1% | -2.2%                        | -2.1% | -1.9%                                 | -1.9% | -2.3%     | -2.7% | -1.8%                   | -1.5% | -2.2%                                         |
| Bangladesh                            | -2.9%              | -2.9% | -2.9%              | -2.9% | -2.8%                        | -2.9% | -3.3%   | -3.3%  | -1.6%                                         | -1.4% | -3.2%                       | -3.2% | -1.5%                     | -1.5% |          |          | -3.0%        | -3.0% | -2.5%                       | -2.6% | 0.2%                       | -0.4% | -2.2%                                         | -2.2% | -1.4%                        | -1.1% | -1.9%                                 | -1.7% | -2.8%     | -2.8% | -1.2%                   | -1.3% | -3.0%                                         |
| Belize                                | -2.2%              | -2.1% | -2.7%              | -2.6% | -2.6%                        | -2.8% | -3.3%   | -3.3%  | -0.9%                                         | -0.7% | -2.7%                       | -2.7% | -2.8%                     | -2.7% | -1.6%    | -1.8%    | -2.7%        | -2.5% | -1.0%                       | -0.6% | -0.1%                      | -0.1% | -1.4%                                         | 0.5%  | -0.3%                        | -0.7% | -0.9%                                 | -0.7% | -2.7%     | -1.9% | -0.9%                   | -0.6% | -1.2%                                         |
| Bhutan                                | -3.0%              | -2.9% | -2.6%              | -2.4% | -2.8%                        | -2.9% | -3.3%   | -3.3%  | -1.6%                                         | -1.7% | -3.3%                       | -3.3% | -2.5%                     | -2.4% | 10.0%    | 11.0%    | -3.0%        | -2.9% | -2.3%                       | -2.3% | -0.3%                      | -0.2% | -1.2%                                         | -1.0% | -1.5%                        | -1.1% | -0.8%                                 | -0.9% | -2.7%     | -2.6% | -2.0%                   | -1.1% | -2.9%                                         |
| Bolivia (Plurinational State of)      | -2.7%              | -2.7% | -2.9%              | -2.9% | -2.8%                        | -2.9% | -3.3%   | -3.3%  | -0.8%                                         | -0.6% | -2.9%                       | -2.9% | -2.7%                     | -2.7% | 4.7%     | 3.8%     | -3.1%        | -3.0% | -2.1%                       | -2.1% | -0.2%                      | -0.2% | -2.1%                                         | -2.1% | -1.7%                        | -1.6% | -1.3%                                 | -1.2% | -2.6%     | -2.5% | -1.9%                   | -1.6% | -2.7%                                         |
| Cabo Verde                            | -2.8%              | -2.8% | -3.1%              | -3.1% | -2.8%                        | -2.6% | 22.5%   | 23.7%  | -0.6%                                         | -1.3% | -3.3%                       | -3.3% | -2.8%                     | -2.8% | -1.1%    | -0.3%    | -3.0%        | -2.7% | -1.8%                       | -1.6% | -0.5%                      | -0.4% | -2.1%                                         | -2.2% | -0.3%                        | -0.3% | -1.0%                                 | -2.5% | -2.4%     | -1.4% | -1.5%                   | -3.0% |                                               |
| Cambodia                              | 2.8%               | -2.8% | -3.0%              | -3.0% | -2.9%                        | -2.8% | -3.1%   | -3.1%  | -1.2%                                         | -1.4% | -3.2%                       | -3.2% | -2.9%                     | -2.8% | 105.4%   | 79.1%    | 2.9%         | -2.8% | -2.5%                       | -2.6% | 0.2%                       | -0.2% | -2.2%                                         | -2.1% | -0.8%                        | -1.2% | -1.7%                                 | -1.4% | -1.9%     | -1.1% | -2.1%                   | -2.1% | -2.9%                                         |
| Cameroon                              | -2.0%              | -2.1% | -2.3%              | -2.2% | -1.9%                        | -1.9% | -0.9%   | -1.0%  | -1.4%                                         | -1.5% | -2.9%                       | -2.9% | -2.1%                     | -2.0% | 4.3%     | 5.7%     | -1.9%        | -1.8% | -2.3%                       | -2.3% | -0.3%                      | -0.2% | -2.3%                                         | -2.3% | -0.2%                        | -0.2% | -1.8%                                 | -2.1% | -1.3%     | -2.2% | -1.2%                   | -0.9% | -1.9%                                         |
| Comoros                               | -2.5%              | -2.6% | -2.6%              | -2.6% | -2.5%                        | -2.7% | -2.7%   | -2.9%  | -1.5%                                         | -1.7% | -2.6%                       | -2.7% | -2.0%                     | -2.0% | 61.2%    | 65.7%    | -2.3%        | -2.4% | -1.7%                       | -1.9% | -0.4%                      | -0.3% | -2.3%                                         | -2.3% | -1.9%                        | -1.9% | -2.1%                                 | -2.4% | -1.1%     | -0.9% | -1.2%                   | -1.0% | -1.9%                                         |
| Congo                                 | -2.4%              | -2.4% | -2.7%              | -2.6% | -2.7%                        | -2.6% | -2.1%   | -2.0%  | -1.1%                                         | -0.8% | -2.4%                       | -2.4% | -2.5%                     | -2.4% | -2.3%    | -2.0%    | -2.6%        | -2.7% | -3.0%                       | -3.0% | -0.4%                      | -0.3% | -1.7%                                         | -1.5% | -1.1%                        | -1.1% | -1.5%                                 | -1.6% | -1.9%     | -2.1% | -1.1%                   | -1.3% | -2.1%                                         |
| Democratic People's Republic of Korea | -2.9%              | -2.9% | -2.2%              | -2.2% | -3.1%                        | -3.1% | 196.0%  | 199.4% | -1.3%                                         | -1.5% | -3.3%                       | -3.3% | -2.7%                     | -2.7% | 27.1%    | 27.5%    | -2.5%        | -2.2% | -1.5%                       | -2.2% | -0.2%                      | -0.2% | -1.6%                                         | -1.7% | -1.5%                        | -1.3% | -1.9%                                 | -2.4% | -2.6%     | -2.7% | -1.4%                   | -0.7% | -1.1%                                         |
| Djibouti                              | 2.2%               | -2.3% | -2.7%              | -2.8% | -2.1%                        | -2.1% | -1.6%   | -1.6%  | -1.2%                                         | -1.2% | -2.4%                       | -2.4% | -2.0%                     | -1.7% | 136.6%   | 211.7%   | -2.3%        | -2.1% | 2.9%                        | -2.9% | -0.2%                      | -0.0% | -1.0%                                         | -0.9% | -1.6%                        | -1.3% | -2.0%                                 | -2.0% | -1.5%     | -0.9% | -1.2%                   | -1.0% | -1.4%                                         |
| Dominican Republic                    | -2.3%              | -2.2% | -3.0%              | -3.0% | -2.8%                        | -2.7% | -2.1%   | -2.0%  | 0.2%                                          | -0.3% | -2.2%                       | -2.1% | -2.7%                     | -2.6% | -1.7%    | -1.7%    | -2.8%        | -2.7% | -1.1%                       | -1.8% | -0.1%                      | -0.2% | -0.3%                                         | -0.3% | -0.0%                        | -0.4% | -1.6%                                 | -1.7% | -2.1%     | -1.9% | -1.5%                   | -1.4% | -1.6%                                         |
| El Salvador                           | -2.7%              | -2.7% | -3.1%              | -3.1% | -2.8%                        | -2.7% | -3.2%   | -3.1%  | -2.3%                                         | -2.5% | -2.9%                       | -2.9% | -3.0%                     | -3.0% | 15.2%    | 13.1%    | -3.1%        | -3.1% | -1.7%                       | -1.5% | -0.2%                      | -0.2% | -1.8%                                         | -2.0% | -0.5%                        | -0.3% | -1.6%                                 | -1.8% | -1.2%     | -1.4% | -0.9%                   | -0.6% | -3.1%                                         |
| Eswatini                              | -0.9%              | -1.4% | -1.5%              | -1.4% | -1.5%                        | -1.7% | -1.8%   | -2.9%  | -0.7%                                         | -1.2% | -3.0%                       | -3.0% | -1.6%                     | -1.7% | 74.9%    | 102.0%   | -1.5%        | -1.5% | -2.1%                       | -1.9% | -0.1%                      | -0.1% | -2.4%                                         | -2.5% | -0.6%                        | -0.7% | -1.1%                                 | -1.3% | -1.4%     | -1.5% | -1.0%                   | -0.6% | -1.9%                                         |
| Ghana                                 | -2.3%              | -2.3% | -2.9%              | -3.0% | -2.3%                        | -2.0% | -1.5%   | -1.0%  | -0.7%                                         | -0.2% | -3.0%                       | -3.0% | -2.3%                     | -2.0% | -0.4%    | -0.1%    | -2.6%        | -2.1% | -2.0%                       | -2.0% | -0.3%                      | -0.2% | -1.0%                                         | -0.7% | -0.1%                        | -0.1% | -0.9%                                 | -0.8% | -2.0%     | -1.8% | -1.1%                   | -0.7% | -2.5%                                         |
| Guatemala                             | 2.7%               | -2.7% | -3.0%              | -3.0% | -2.6%                        | -2.5% | -3.2%   | -3.2%  | -2.0%                                         | -2.1% | -3.1%                       | -3.1% | -2.4%                     | -2.4% | 1.4%     | 0.8%     | 3.2%         | -3.1% | -2.8%                       | -2.8% | 0.2%                       | -0.3% | -0.9%                                         | -2.3% | -1.8%                        | -1.5% | -1.1%                                 | -0.9% | -1.6%     | -0.8% | -0.7%                   | -0.5% | -2.7%                                         |
| Honduras                              | -2.7%              | -2.6% | -3.0%              | -2.9% | -3.0%                        | -2.8% | -3.2%   | -3.2%  | -1.6%                                         | -1.6% | -2.8%                       | -2.7% | -2.6%                     | -2.3% | -1.9%    | -2.0%    | -2.9%        | -2.8% | -0.4%                       | -0.8% | -0.3%                      | -0.3% | -2.0%                                         | -1.9% | -1.5%                        | -1.4% | -1.8%                                 | -1.9% | -2.7%     | -2.4% | 0.3%                    | 0.4%  | -3.1%                                         |
| India                                 | -2.7%              | -2.7% | -2.7%              | -2.7% | -2.6%                        | -2.7% | -3.0%   | -3.0%  | -1.7%                                         | -1.8% | -3.1%                       | -3.1% | -2.7%                     | -2.6% | 13.1%    | 12.2%    | -2.7%        | -2.7% | -2.3%                       | -2.4% | -0.7%                      | -0.6% | -2.2%                                         | -2.2% | -1.2%                        | -0.9% | -1.5%                                 | -1.6% | -2.4%     | -2.1% | -1.8%                   | -1.5% | -3.0%                                         |
| Kenya                                 | -2.3%              | -2.2% | -2.1%              | -2.0% | -2.5%                        | -2.6% | -2.4%   | -2.4%  | -1.2%                                         | -1.4% | -2.9%                       | -2.9% | -2.4%                     | -2.4% | -1.9%    | -1.6%    | -2.1%        | -1.5% | -1.7%                       | -2.1% | -0.2%                      | -0.1% | -2.2%                                         | -2.4% | -1.0%                        | -1.1% | -1.1%                                 | -1.2% | -1.4%     | -0.7% | -0.3%                   | -0.0% | -1.9%                                         |
| Kiribati                              | -2.1%              | -2.1% | -2.6%              | -2.4% | -2.4%                        | -2.3% |         |        | -0.7%                                         | -0.7% | -2.1%                       | -2.1% | -2.3%                     | -2.3% | 0.9%     | 1.1%     | -1.8%        | -1.8% | -1.0%                       | -2.1% | -0.1%                      | -0.1% | -0.6%                                         | -0.6% | -0.3%                        | -0.0% | -0.6%                                 | -1.0% | -1.8%     | -2.4% | -1.3%                   | -1.1% | -1.2%                                         |
| Kyrgyzstan                            | -2.7%              | -2.8% | -2.7%              | -2.8% | -2.9%                        | -2.9% | -3.3%   | -3.3%  | 0.0%                                          | -0.1% | -1.8%                       | -1.8% | -2.7%                     | -2.7% | 4.8%     | 6.2%     | -2.2%        | -2.4% | -0.5%                       | -0.7% | -0.2%                      | -0.1% | -2.8%                                         | -2.8% | -2.0%                        | -1.2% | 0.4%                                  | 0.1%  | -2.9%     | -2.7% | -2.1%                   | -2.0% | -0.8%                                         |
| Laos                                  | -2.8%              | -2.8% | -2.9%              | -3.0% | -2.9%                        | -2.9% | -2.9%   | -2.9%  | -1.1%                                         | -1.3% | -3.0%                       | -3.1% | -2.8%                     | -2.7% | 4.834.4% | 5.756.6% | -2.9%        | -2.9% | -1.8%                       | -2.1% | -0.2%                      | -0.2% | -1.5%                                         | -1.4% | -1.0%                        | -1.8% | -1.7%                                 | -1.7% | -2.9%     | -3.0% | -1.3%                   | -1.3% | -3.1%                                         |
| Lesotho                               | -0.6%              | -0.9% | -2.1%              | -2.0% | -1.2%                        | -1.0% |         |        | -0.9%                                         | -0.9% | -3.0%                       | -3.0% | -1.5%                     | -1.1% | 18.0%    | 20.3%    | -0.7%        | -0.3% | -2.6%                       | -2.5% | -0.1%                      | -0.1% | -1.8%                                         | -1.8% | -0.6%                        | -0.5% | -1.2%                                 | -1.2% | -1.1%     | -1.6% | -0.5%                   | -0.3% | -1.6%                                         |
| Maldives                              | -2.5%              | -2.8% | -2.8%              | -2.9% | -2.9%                        | -2.9% | -1.2%   | -1.7%  | -3.2%                                         | -3.2% | -2.7%                       | -2.7% | -2.7%                     | -2.7% | 12.9%    | 7.7%     | -3.2%        | -3.1% | -2.3%                       | -2.1% | -0.1%                      | -0.2% | -1.8%                                         | -1.9% | -0.3%                        | -0.5% | -2.0%                                 | -2.3% | -3.0%     | -1.8% | -2.8%                   | -2.5% | -2.9%                                         |
| Marshall Islands                      | -1.5%              | -1.6% | -2.3%              | -2.4% | -1.5%                        | -1.7% |         |        | -0.8%                                         | -0.9% | -1.8%                       | -1.9% | -1.7%                     | -1.9% | 6.6%     | 4.7%     | -1.4%        | -1.6% | -1.0%                       | -1.1% | -0.0%                      | -0.1% | -0.5%                                         | -0.4% | -0.1%                        | -0.2% | -0.8%                                 | -0.7% | -1.8%     | -2.0% | 0.5%                    | -0.7% | -1.3%                                         |
| Mauritania                            | 2.5%               | -2.4% | -2.7%              | -2.5% | -2.6%                        | -2.6% | 7.4%    | 7.3%   | -1.8%                                         | -1.8% | -3.1%                       | -3.1% | -2.6%                     | -2.5% | -2.8%    | -2.6%    | -2.7%        | -2.8% | -1.7%                       | -2.0% | -0.5%                      | -0.4% | -2.0%                                         | -2.0% | -0.2%                        | -0.3% | -1.8%                                 | -2.0% | -1.8%     | -2.3% | -1.6%                   | -1.5% | -2.8%                                         |
| Micronesia (Federated States of)      | -2.2%              | -2.2% | -2.6%              | -2.6% | -2.5%                        | -2.5% |         |        | -1.4%                                         | -1.5% | -2.7%                       | -2.7% | -2.4%                     | -2.4% | -0.7%    | -0.9%    | -2.2%        | -2.2% | -2.0%                       | -2.5% | -0.1%                      | -0.1% | -1.6%                                         | -1.6% | -0.1%                        | -0.2% | -1.1%                                 | -0.8% | -1.9%     | -1.5% | -0.7%                   | -0.6% | -1.9%                                         |
| Mongolia                              | -2.9%              | -2.9% | -3.0%              | -3.0% | -3.0%                        | -3.0% |         |        | -0.5%                                         | -0.8% | -2.7%                       | -2.8% | -3.0%                     | -2.9% | 484.9%   | 578.4%   | -2.9%        | -2.8% | -2.3%                       | -1.8% | -0.1%                      | -0.4% | 1.8%                                          | 1.6%  | -1.2%                        | -1.3% | -1.6%                                 | -2.7% | -3.0%     | -2.9% | -1.3%                   | -1.3% | -2.7%                                         |
| Morocco                               | -2.9%              | -2.9% | -3.0%              | -2.9% | -3.0%                        | -3.0% | -3.3%   | -3.3%  | -1.3%                                         | -1.4% | -3.1%                       | -3.1% | -2.8%                     | -2.9% | 6.0%     | 5.1%     | -2.8%        | -2.9% | -1.6%                       | -1.6% | -0.1%                      | -0.1% | -1.7%                                         | -1.7% | -0.1%                        | -0.1% | -1.4%                                 | -1.6% | -2.6%     | -2.6% | -2.2%                   | -2.0% | -3.1%                                         |
| Myanmar                               | -2.8%              | -2.8% | -3.0%              | -3.1% | -2.9%                        | -2.8% | -3.2%   | -3.2%  | -1.5%                                         | -1.4% | -3.0%                       | -3.0% | -2.9%                     | -2.5% | 73.4%    | 47.9%    | -2.9%        | -2.8% | -2.5%                       | -2.4% | -0.1%                      | -0.1% | -0.4%                                         | 0.1%  | -0.8%                        | -1.0% | -1.1%                                 | -1.1% | -2.1%     | -2.1% | -1.5%                   | -2.0% | -2.6%                                         |
| Nicaragua                             | -2.8%              | -2.8% | -3.1%              | -3.2% | -2.8%                        | -2.7% | -3.1%   | -3.1%  | -2.1%                                         | -2.1% | -3.3%                       | -3.3% | -2.9%                     | -2.9% | 21.2%    | 22.3%    | -3.0%        | -3.1% | -1.6%                       | -1.8% | -0.2%                      | -0.3% | -2.3%                                         | -2.4% | -0.2%                        | -0.2% | -2.3%                                 | -2.0% | -2.4%     | -2.0% | -1.3%                   | -0.9% | -2.8%                                         |
| Nigeria                               | -2.1%              | -2.2% | -2.2%              | -2.5% | -2.0%                        | -2.1% | -2.0%   | -1.9%  | -1.1%                                         | -1.1% | -2.9%                       | -2.9% | -1.9%                     | -1.8% | 3.7%     | 5.0%     | -2.5%        | -2.4% | -1.8%                       | -2.5% | -0.1%                      | 0.1%  | -0.5%                                         | -0.5% | -0.6%                        | -0.4% | -0.8%                                 | -0.9% | -2.1%     | -2.4% | -1.8%                   | -1.7% | -1.9%                                         |
| Palestine                             | -2.7%              | -2.6% | -1.8%              | -1.7% | -2.9%                        | -2.7% |         |        | -1.9%                                         | -1.5% | -3.3%                       | -3.3% | -3.0%                     | -2.9% | 22.5%    | 19.2%    | -2.9%        | -2.8% | -2.1%                       | -2.5% | -0.1%                      | -0.1% | -1.4%                                         | -1.4% | -0.2%                        | -0.2% | -1.6%                                 | -1.5% | -2.8%     | -2.0% | -1.4%                   | -1.1% | -2.3%                                         |
| Sao Tome and Principe                 | -2.9%              | -2.8% | -3.1%              | -3.1% | -2.8%                        | -2.9% | -2.2%   | -2.5%  | -1.8%                                         | -1.5% | -3.2%                       | -3.2% | -2.5%                     | -2.6% | -1.1%    | -1.3%    | -2.8%        | -2.6% | -2.1%                       | -2.2% | -0.5%                      | -0.4% | -1.8%                                         | -1.8% | -0.3%                        | -0.4% | -1.6%                                 | -2.0% | -2.1%     | -2.6% | -1.2%                   | -1.6% | -2.3%                                         |
| Sudan                                 | -2.8%              | -2.9% | -2.7%              | -2.8% | -3.0%                        | -2.9% |         |        | -2.3%                                         | -2.3% | -1.5%                       | -1.7% | -3.2%                     | -3.0% | 9.2%     | 6.6%     | -3.0%        | -3.0% | -2.6%                       | -2.6% | 0.0%                       | 0.0%  | -1.2%                                         | -1.1% | -0.3%                        | -0.3% | -1.4%                                 | -1.6% | -2.7%     | -3.1% | -2.7%                   | -2.2% | -2.7%                                         |
| Tajikistan                            | -2.7%              | -2.7% | -2.8%              | -2.9% | -2.7%                        | -2.6% | -3.3%   | -3.3%  | 0.0%                                          | -0.5% | -2.1%                       | -2.0% | -2.8%                     | -2.9% | 5.2%     | 1.9%     | -2.1%        | -1.7% | -1.2%                       | -1.0% | -0.1%                      | -0.1% | -1.5%                                         | -1.4% | -1.7%                        | -1.4% | -0.7%                                 | -0.7% | -2.8%     | -2.7% | -1.9%                   | -1.4% | -1.2%                                         |
| Timor-Leste                           | -2.9%              | -2.8% | -2.8%              | -2.8% | -2.9%                        | -3.0% | -3.3%   | -3.3%  | -1.7%                                         | -1.5% | -3.1%                       | -3.1% | -2.7%                     | -2.7% | 6.6%     | 7.1%     | -2.9%        | -2.9% | -2.0%                       | -2.1% | -0.1%                      | -0.1% | -1.8%                                         | -1.5% | -0.9%                        | -1.1% | -1.3%                                 | -1.2% | -2.9%     | -2.6% | -0.9%                   | -0.2% | -2.5%                                         |
| Tuvalu                                | -2.7%              | -2.7% | -2.5%              | -2.4% | -3.0%                        | -3.0% |         |        | -1.7%                                         | -1.8% | -2.8%                       | -2.8% | -2.9%                     | -2.9% | 31.9%    | 29.1%    | -2.8%        | -2.9% | -1.1%                       | -0.6% | -0.1%                      | -0.2% | -1.8%                                         | -1.9% | -0.2%                        | -0.3% | -1.6%                                 | -1.5% | -2.4%     | -2.1% | -2.0%                   | -1.4% | -2.7%                                         |
| Vanuatu                               | -1.6%              | -1.7% | -2.0%              | -2.0% | -1.5%                        | -1.4% | -3.3%   | -3.3%  | -1.1%                                         | -1.1% | -2.2%                       | -2.2% | -1.3%                     | -1.4% | 4.9%     | 3.4%     | -1.3%        | -1.3% | 0.7%                        | -2.1% | 0.0%                       | 0.0%  | -0.0%                                         | 0.1%  | -0.1%                        | -0.1% | 0.1%                                  | 0.3%  | -1.5%     | -2.0% | 0.7%                    | 0.4%  | -0.8%                                         |
| Venezuela (Bolivarian Republic of)    | -1.8%              | -1.9% | -2.7%              | -2.7% | -2.0%                        | -1.9% | 6.6%    | 5.2%   | -0.6%                                         | -0.9% | -2.2%                       | -2.0% | -2.4%                     | -2.6% | -1.5%    | -1.5%    | -2.2%        | -2.6% | -1.4%                       | -1.3% | -0.1%                      | -0.1% | -0.4%                                         | -1.1% | -0.2%                        | -0.2% | -0.7%                                 | -0.4% | -2.3%     | -2.4% | -2.4%                   | -2.5% | -1.6%                                         |
| Zambia                                | -2.5%              | -2.5% | -2.6%              | -2.5% | -2.8%                        | -2.8% | -2.5%   | -2.5%  | -1.2%                                         | -1.3% | -3.1%                       | -3.1% | -2.9%                     | -2.9% | -1.8%    | -1.2%    | -2.7%        | -2.6% | -2.8%                       | -3.0% | -                          |       |                                               |       |                              |       |                                       |       |           |       |                         |       |                                               |

0 to 24 years, percentage change in DALYs/100,000, for males and females, 1990 to 2019

|                                  | Total communicable |       | Enteric infections |       | Lower respiratory infections |       | Malaria |       | Neonatal sepsis and other neonatal infections |       | Vaccine Preventable disease |       | Meningitis & Encephalitis |       | HIV/AIDS |        | Tuberculosis |       | Neglected Tropical diseases |       | Infectious skin conditions |       | Sexually transmitted infections excluding HIV |       | Upper respiratory infections |       | Other unspecified infectious diseases |       | Hepatitis |       | Rheumatic heart disease |       | Maternal sepsis and other maternal infections |
|----------------------------------|--------------------|-------|--------------------|-------|------------------------------|-------|---------|-------|-----------------------------------------------|-------|-----------------------------|-------|---------------------------|-------|----------|--------|--------------|-------|-----------------------------|-------|----------------------------|-------|-----------------------------------------------|-------|------------------------------|-------|---------------------------------------|-------|-----------|-------|-------------------------|-------|-----------------------------------------------|
|                                  | Female             | Male  | Female             | Male  | Female                       | Male  | Female  | Male  | Female                                        | Male  | Female                      | Male  | Female                    | Male  | Female   | Male   | Female       | Male  | Female                      | Male  | Female                     | Male  | Female                                        | Male  | Female                       | Male  | Female                                | Male  | Female    | Male  | Female                  | Male  | Female                                        |
|                                  |                    |       |                    |       |                              |       |         |       |                                               |       |                             |       |                           |       |          |        |              |       |                             |       |                            |       |                                               |       |                              |       |                                       |       |           |       |                         |       | Female                                        |
| Albania                          | -2.8%              | -3.8% | -1.9%              | -1.9% | -3.0%                        | -3.0% | -2.8%   | -2.8% | -2.8%                                         | -2.8% | -3.2%                       | -3.2% | -2.7%                     | -2.7% | 1.7%     | 3.9%   | -3.0%        | -3.0% | -2.1%                       | -2.4% | -0.5%                      | -0.5% | -1.7%                                         | -1.6% | -0.6%                        | -0.8% | -1.9%                                 | -1.9% | -2.2%     | -1.6% | -1.3%                   | -1.4% | -0.6%                                         |
| Algeria                          | -2.6%              | -2.7% | -2.4%              | -2.8% | -2.8%                        | -2.8% | -2.9%   | -2.9% | -0.8%                                         | -0.7% | -3.0%                       | -3.1% | -2.7%                     | -2.7% | 2.1%     | 2.1%   | -2.9%        | -2.9% | -1.8%                       | -2.1% | -0.3%                      | -0.1% | -1.4%                                         | -1.8% | -0.1%                        | -0.1% | -1.2%                                 | -1.4% | -2.5%     | -2.6% | -2.4%                   | -2.1% | -3.1%                                         |
| Armenia                          | -2.6%              | -2.5% | -2.8%              | -2.9% | -2.8%                        | -2.6% | -3.3%   | -3.3% | -1.5%                                         | -2.0% | -1.4%                       | -1.4% | -1.8%                     | -1.2% | 19.9%    | 16.6%  | -2.4%        | -2.2% | -0.5%                       | -0.4% | -0.0%                      | -0.0% | -0.4%                                         | -0.8% | -1.5%                        | -0.3% | 0.0%                                  | 0.3%  | -2.2%     | -0.9% | -1.2%                   | -1.0% | -2.0%                                         |
| Azerbaijan                       | -2.6%              | -2.7% | -2.9%              | -3.0% | -2.7%                        | -2.8% | -3.3%   | -3.3% | 0.0%                                          | -0.4% | -2.5%                       | -2.5% | -1.7%                     | -1.8% | 1.3%     | 0.1%   | -2.6%        | -2.4% | -1.8%                       | -1.7% | -0.1%                      | -0.0% | -1.1%                                         | -1.3% | -1.3%                        | -1.3% | -0.2%                                 | -0.3% | -2.5%     | -2.3% | -1.2%                   | -0.9% | -1.7%                                         |
| Botswana                         | -1.6%              | -1.7% | -2.1%              | -2.3% | -0.2%                        | -0.6% | 0.4%    | 0.3%  | -0.8%                                         | -1.0% | -2.8%                       | -2.9% | -0.7%                     | -0.9% | -1.6%    | -1.5%  | -1.1%        | -1.4% | -2.3%                       | -2.3% | -0.1%                      | -0.1% | -1.9%                                         | -2.0% | -0.3%                        | -0.4% | -1.0%                                 | -1.0% | -1.4%     | -1.8% | -0.9%                   | -1.1% | -2.5%                                         |
| Brazil                           | -2.6%              | -2.6% | -3.0%              | -3.0% | -2.8%                        | -2.8% | -3.2%   | -3.3% | -1.5%                                         | -1.6% | -2.5%                       | -2.7% | -2.8%                     | -2.8% | -1.1%    | -1.7%  | -2.8%        | -2.8% | -2.4%                       | -2.3% | -0.0%                      | -0.1% | -1.5%                                         | -1.8% | -0.5%                        | -0.6% | -0.8%                                 | -0.8% | -1.9%     | -2.0% | -1.4%                   | -1.6% | -1.8%                                         |
| China                            | 2.9%               | -2.9% | -3.0%              | -3.0% | -3.1%                        | -3.1% | -3.3%   | -3.3% | 4.4%                                          | 2.1%  | -3.2%                       | -3.2% | -2.8%                     | -2.8% | 6.6%     | 9.0%   | 3.1%         | -3.1% | -2.6%                       | -2.5% | -0.2%                      | -0.2% | -1.1%                                         | -1.2% | -1.6%                        | -1.5% | -2.4%                                 | -2.7% | -3.0%     | -2.9% | -2.6%                   | -2.4% | -3.1%                                         |
| Colombia                         | -2.1%              | -2.2% | -2.9%              | -2.9% | -2.4%                        | -2.6% | -3.2%   | -3.2% | 0.6%                                          | 0.8%  | -2.6%                       | -2.7% | -2.5%                     | -2.6% | 10.7%    | 4.8%   | -2.6%        | -2.8% | 0.3%                        | -0.2% | -0.1%                      | -0.1% | -2.1%                                         | -2.3% | -0.5%                        | -0.6% | -1.2%                                 | -1.0% | -1.5%     | -1.5% | -2.8%                   | -2.9% | -2.1%                                         |
| Costa Rica                       | -1.9%              | -2.0% | -2.2%              | -2.3% | -2.6%                        | -2.6% | -3.3%   | -3.3% | -2.1%                                         | -2.5% | -2.2%                       | -2.0% | -2.3%                     | -2.4% | -0.6%    | -0.2%  | -2.7%        | -2.7% | -1.3%                       | -1.3% | -0.1%                      | -0.1% | -1.4%                                         | -1.1% | -0.2%                        | -0.2% | -0.7%                                 | -0.1% | -2.0%     | -1.7% | -0.6%                   | -0.5% | -2.2%                                         |
| Cuba                             | -1.7%              | -1.7% | -1.6%              | -1.7% | -2.1%                        | -2.2% |         |       | -0.7%                                         | -1.4% | -1.3%                       | -1.4% | -2.9%                     | -2.9% | 1.7%     | 3.0%   | -2.4%        | -2.4% | -1.0%                       | -0.9% | 0.0%                       | -0.1% | 1.4%                                          | -0.4% | -0.1%                        | -0.2% | -0.5%                                 | -0.3% | -2.4%     | -2.3% | -1.5%                   | -1.4% | -2.1%                                         |
| Ecuador                          | -2.6%              | -2.5% | -3.0%              | -3.1% | -2.5%                        | -2.5% | -3.3%   | -3.3% | -1.8%                                         | -2.1% | -2.4%                       | -2.5% | -2.4%                     | -2.4% | 10.5%    | 15.1%  | -3.0%        | -2.8% | -2.4%                       | -2.3% | -0.0%                      | -0.0% | -1.5%                                         | -1.7% | -0.8%                        | -0.8% | -1.7%                                 | -1.6% | -2.5%     | -2.2% | -1.2%                   | -1.1% | -2.4%                                         |
| Egypt                            | 2.9%               | -2.8% | -2.8%              | -2.8% | -3.0%                        | -3.0% | -3.3%   | -3.3% | -1.6%                                         | -1.7% | -3.2%                       | -3.2% | -2.5%                     | -2.4% | -1.8%    | -1.7%  | -2.8%        | -2.8% | 2.9%                        | -2.9% | -0.3%                      | -0.3% | -1.8%                                         | -1.8% | -0.6%                        | -0.5% | -1.9%                                 | -1.9% | -3.0%     | -2.7% | -2.9%                   | -2.5% | -3.0%                                         |
| Equatorial Guinea                | -2.8%              | -2.9% | -3.2%              | -3.3% | -3.2%                        | -3.2% | -2.3%   | -2.3% | -2.1%                                         | -2.1% | -3.2%                       | -3.2% | -3.0%                     | -2.9% | 42.5%    | 38.8%  | -3.2%        | -3.2% | -2.6%                       | -3.0% | -0.8%                      | -0.7% | -1.6%                                         | -1.5% | -2.3%                        | -2.4% | -2.4%                                 | -2.5% | -2.7%     | -2.6% | -1.8%                   | -1.8% | -3.2%                                         |
| Fiji                             | -1.1%              | -1.1% | -0.9%              | -0.9% | -0.8%                        | -0.8% |         |       | -1.1%                                         | -1.1% | -2.2%                       | -2.4% | -1.7%                     | -1.5% | 7.3%     | 6.5%   | -1.8%        | -1.4% | -0.6%                       | -1.7% | -0.0%                      | -0.0% | -0.2%                                         | -0.2% | -0.1%                        | -0.1% | -0.2%                                 | -0.5% | -1.5%     | -1.1% | -0.8%                   | -0.8% | -1.7%                                         |
| Gabon                            | -2.4%              | -2.4% | -2.9%              | -2.7% | -2.8%                        | -2.7% | -2.3%   | -2.3% | -2.2%                                         | -1.3% | -2.9%                       | -2.8% | -2.7%                     | -2.5% | 1.7%     | 1.9%   | -2.7%        | -2.7% | -2.5%                       | -2.6% | -0.5%                      | -0.3% | -2.2%                                         | -2.1% | -1.0%                        | -1.2% | -1.7%                                 | -1.8% | -1.9%     | -1.8% | -0.7%                   | -0.9% | -2.6%                                         |
| Grenada                          | -1.4%              | -1.6% | -1.3%              | -1.9% | -1.8%                        | -1.9% |         |       | 0.2%                                          | -0.2% | -2.4%                       | -2.4% | -2.8%                     | -2.9% | -1.6%    | -2.0%  | -2.2%        | -2.3% | -1.7%                       | -1.7% | -0.1%                      | -0.2% | 0.1%                                          | -1.4% | -0.3%                        | -0.6% | -1.0%                                 | -0.7% | -2.5%     | -2.0% | -1.5%                   | -0.8% | -2.0%                                         |
| Guyana                           | 2.0%               | -2.1% | -2.6%              | -2.8% | -1.8%                        | -1.9% | -2.9%   | -3.0% | -0.7%                                         | -0.7% | -2.6%                       | -2.8% | -2.2%                     | -2.3% | 1.0%     | -1.1%  | -2.2%        | -2.2% | 1.3%                        | -1.0% | 0.1%                       | 0.0%  | -1.9%                                         | -2.6% | -0.2%                        | -0.3% | -0.9%                                 | -0.5% | -2.4%     | -2.1% | -1.3%                   | -1.4% | -1.8%                                         |
| Indonesia                        | -2.6%              | -2.6% | -2.7%              | -2.7% | -2.9%                        | -2.9% | -2.8%   | -2.9% | -1.4%                                         | -1.6% | -3.0%                       | -3.0% | -2.6%                     | -2.7% | 420.0%   | 487.6% | -2.8%        | -2.6% | -2.4%                       | -1.8% | -0.1%                      | -0.1% | -0.3%                                         | -0.0% | -0.2%                        | -0.3% | -1.5%                                 | -1.9% | -2.9%     | -1.6% | -2.2%                   | -2.0% | -2.8%                                         |
| Iran (Islamic Republic of)       | -2.8%              | -2.7% | -2.4%              | -2.4% | -3.1%                        | -3.0% | -3.3%   | -3.3% | -1.5%                                         | -1.1% | -3.2%                       | -3.2% | -3.8%                     | -2.7% | 88.7%    | 72.4%  | -3.0%        | -3.0% | -2.3%                       | -2.4% | -0.1%                      | -0.1% | -1.2%                                         | -1.2% | -0.2%                        | -0.2% | -1.2%                                 | -1.4% | -2.8%     | -2.4% | -2.4%                   | -2.0% | -2.8%                                         |
| Iraq                             | -2.6%              | -2.7% | -2.7%              | -2.7% | -2.9%                        | -3.1% | -3.3%   | -3.3% | -1.9%                                         | -1.0% | -2.9%                       | -3.0% | -2.5%                     | -2.7% | 17.7%    | 15.3%  | -2.9%        | -3.0% | -1.9%                       | -2.3% | -0.2%                      | -0.2% | -1.4%                                         | -1.4% | -0.4%                        | -0.4% | -1.6%                                 | -2.1% | -2.7%     | -2.7% | -2.2%                   | -2.0% | -1.8%                                         |
| Jamaica                          | -1.5%              | -1.8% | -2.8%              | -2.9% | -2.5%                        | -2.5% |         |       | 2.0%                                          | 0.4%  | -2.3%                       | -2.7% | -2.5%                     | -2.7% | 1.5%     | 0.3%   | -1.8%        | -2.4% | -0.3%                       | -0.2% | -0.1%                      | -0.2% | -1.1%                                         | -0.1% | -0.1%                        | -0.1% | 0.2%                                  | 1.3%  | -0.8%     | -1.2% | -1.9%                   | -1.8% | -2.3%                                         |
| Mexico                           | -2.6%              | -2.6% | -3.1%              | -3.1% | -2.8%                        | -2.8% | -3.2%   | -3.2% | -0.7%                                         | -0.9% | -2.9%                       | -2.9% | -2.4%                     | -2.5% | 1.5%     | 0.5%   | -2.9%        | -2.8% | -1.9%                       | -1.9% | 0.1%                       | 0.1%  | -1.4%                                         | -2.4% | -1.5%                        | -1.6% | -1.6%                                 | -1.4% | -1.8%     | -1.5% | -2.0%                   | -1.9% | -1.9%                                         |
| Namibia                          | -1.6%              | -1.7% | -2.0%              | -1.8% | -1.9%                        | -2.0% | -2.4%   | -2.5% | -0.8%                                         | -1.0% | -3.1%                       | -3.2% | -1.9%                     | -1.8% | 8.0%     | 11.6%  | -2.0%        | -2.0% | -1.3%                       | -1.2% | -0.1%                      | -0.1% | -1.4%                                         | -1.4% | -0.5%                        | -0.6% | -1.3%                                 | -1.4% | -1.6%     | -1.4% | -1.3%                   | -1.1% | -2.5%                                         |
| Nauru                            | -1.6%              | -1.5% | -1.4%              | -1.5% | -1.6%                        | -1.6% |         |       | -0.9%                                         | -0.9% | -3.1%                       | -3.1% | -1.8%                     | -1.7% | 37.4%    | 32.6%  | -1.7%        | -1.9% | 1.2%                        | 2.0%  | -0.0%                      | -0.0% | -0.2%                                         | -0.2% | -0.0%                        | -0.1% | -0.8%                                 | -0.5% | -1.4%     | -1.3% | -0.2%                   | -0.2% | -1.2%                                         |
| Panama                           | -1.3%              | -1.1% | -1.7%              | -1.9% | -0.9%                        | -0.5% | -2.8%   | -3.0% | -0.5%                                         | -0.8% | -2.8%                       | -2.9% | -2.3%                     | -2.5% | 1.8%     | 8.5%   | -2.2%        | -2.3% | -2.1%                       | -2.3% | -0.1%                      | -0.0% | 0.8%                                          | 1.0%  | 0.1%                         | 0.1%  | 0.8%                                  | 1.1%  | -2.3%     | -2.1% | -1.7%                   | -1.4% | -1.7%                                         |
| Paraguay                         | -2.2%              | -2.2% | -2.8%              | -2.8% | -2.6%                        | -2.6% | -3.3%   | -3.3% | -2.8%                                         | -2.8% | -2.9%                       | -2.9% | -2.6%                     | -2.6% | 22.1%    | 20.6%  | -2.6%        | -2.2% | -1.7%                       | -1.6% | -0.1%                      | -0.1% | -0.6%                                         | -0.6% | -0.2%                        | -0.3% | -0.3%                                 | -0.3% | -1.6%     | -1.0% | -0.6%                   | -0.4% | -2.8%                                         |
| Peru                             | -2.6%              | -2.6% | -2.9%              | -3.0% | -3.0%                        | -3.0% | -3.2%   | -3.2% | -0.9%                                         | -1.1% | -2.5%                       | -2.5% | -2.5%                     | -2.4% | 14.2%    | 10.0%  | -3.1%        | -3.1% | -2.1%                       | -2.0% | -0.3%                      | -0.3% | -2.3%                                         | -2.4% | -0.6%                        | -0.8% | -1.6%                                 | -1.2% | -2.6%     | -2.5% | -1.0%                   | -0.9% | -2.9%                                         |
| Philippines                      | -2.2%              | -2.2% | -2.6%              | -2.7% | -2.4%                        | -2.4% | -3.2%   | -3.2% | -0.8%                                         | -1.2% | -2.6%                       | -2.6% | -2.2%                     | -2.1% | 13.9%    | 11.2%  | -2.3%        | -2.2% | -1.1%                       | -1.6% | -0.1%                      | -0.2% | -0.0%                                         | -0.2% | -0.5%                        | -0.4% | -0.7%                                 | 0.5%  | -2.7%     | -2.6% | 2.6%                    | 2.1%  | -2.0%                                         |
| Saint Lucia                      | -1.4%              | -1.8% | -1.9%              | -2.2% | -2.0%                        | -2.1% |         |       | -0.4%                                         | -0.7% | -2.2%                       | -1.9% | -2.4%                     | -2.6% | -1.4%    | -1.7%  | -2.5%        | -2.4% | -1.6%                       | -1.7% | -0.1%                      | -0.1% | -2.0%                                         | -2.2% | -0.2%                        | -0.7% | -0.8%                                 | -0.6% | -1.6%     | -1.6% | -1.0%                   | -0.7% | -2.1%                                         |
| Saint Vincent and the Grenadines | -1.3%              | -1.6% | -2.3%              | -2.4% | -1.8%                        | -2.0% |         |       | 1.1%                                          | 0.4%  | -1.2%                       | -1.8% | -2.5%                     | -2.6% | -0.4%    | -1.3%  | -2.5%        | -2.2% | -1.4%                       | -1.3% | 0.2%                       | 0.1%  | -0.5%                                         | -2.8% | -0.1%                        | -0.6% | -1.0%                                 | -0.7% | -2.2%     | -1.4% | -1.3%                   | -1.0% | -1.1%                                         |
| Samoa                            | -1.6%              | -1.5% | -1.5%              | -1.5% | -2.4%                        | -2.4% |         |       | -0.9%                                         | -1.0% | -1.7%                       | -1.4% | -2.2%                     | -2.2% | 8.7%     | 7.3%   | -1.9%        | -2.1% | 0.1%                        | -0.9% | -0.1%                      | -0.1% | -0.4%                                         | -0.2% | -0.1%                        | -0.1% | -0.8%                                 | -0.7% | -1.1%     | -1.7% | -0.8%                   | -1.0% | -2.6%                                         |
| South Africa                     | -1.3%              | -1.7% | -2.4%              | -2.5% | -2.4%                        | -2.4% | -1.6%   | -1.8% | 0.6%                                          | -0.1% | -2.5%                       | -2.6% | -2.3%                     | -2.3% | 28.2%    | 25.0%  | -2.1%        | -2.2% | -2.2%                       | -2.2% | -0.2%                      | -0.2% | -1.4%                                         | -1.5% | -0.6%                        | -0.6% | -0.4%                                 | -0.9% | -2.1%     | -2.4% | -1.7%                   | -1.2% | -2.7%                                         |
| Suriname                         | -1.9%              | -2.0% | -2.6%              | -2.7% | -1.8%                        | -2.0% | -3.3%   | -3.3% | -0.3%                                         | -0.4% | -2.9%                       | -2.8% | -2.4%                     | -2.4% | -1.3%    | -1.6%  | -2.5%        | -2.5% | 0.3%                        | -0.1% | -0.1%                      | -0.1% | -1.4%                                         | -1.4% | -0.2%                        | -0.2% | -0.6%                                 | -0.3% | 2.3%      | -2.4% | -1.3%                   | -1.1% | -1.4%                                         |
| Syrian Arab Republic             | -2.7%              | -2.7% | -2.7%              | -2.6% | -2.7%                        | -2.7% | -3.3%   | -3.3% | -2.3%                                         | -2.3% | -3.1%                       | -3.1% | -2.6%                     | -2.7% | -0.1%    | 1.1%   | -2.8%        | -2.9% | 1.9%                        | 1.8%  | -0.3%                      | -0.2% | -2.1%                                         | -2.1% | -0.3%                        | -0.4% | -1.5%                                 | -1.7% | -2.4%     | -2.5% | -2.6%                   | -2.7% | -2.7%                                         |
| Thailand                         | -2.1%              | -2.2% | -2.2%              | -2.5% | -2.6%                        | -2.7% | -3.3%   | -3.3% | 1.3%                                          | 0.4%  | -2.9%                       | -2.9% | -2.6%                     | -2.6% | 3.0%     | 3.3%   | -2.9%        | -3.0% | -2.4%                       | -2.7% | -0.2%                      | -0.3% | -2.3%                                         | -2.3% | -0.3%                        | -0.3% | -1.5%                                 | -1.7% | -2.2%     | -1.8% | -1.8%                   | -2.1% | -1.7%                                         |
| Tokelau                          | -2.2%              | -2.1% | -2.1%              | -2.0% | -2.6%                        | -2.7% |         |       | -1.5%                                         | -1.5% | -2.6%                       | -2.5% | -2.4%                     | -2.4% | 37.1%    | 31.6%  | -2.5%        | -2.8% | -0.6%                       | 0.0%  | -0.1%                      | -0.1% | -1.2%                                         | -1.2% | -0.2%                        | -0.2% | -1.3%                                 | -1.1% | -1.5%     | -1.4% | -1.6%                   | -1.4% | -2.4%                                         |
| Tonga                            | -1.3%              | -1.3% | -1.4%              | -1.1% | -1.8%                        | -1.7% |         |       | -0.7%                                         | -0.7% | -1.4%                       | -1.5% | -1.6%                     | -1.5% | 9.3%     | 10.0%  | -1.8%        | -1.6% | -1.2%                       | -1.7% | -0.0%                      | -0.0% | -0.7%                                         | -0.7% | -0.1%                        | -0.1% | -0.7%                                 | -0.3% | -2.1%     | -2.0% | -0.7%                   | -0.5% | -1.3%                                         |
| Tunisia                          | -2.7%              | -2.5% | -2.0%              | -1.7% | -3.1%                        | -3.0% |         |       | -1.6%                                         | -1.6% | -3.0%                       | -2.9% | -2.8%                     | -2.6% | 25.7%    | 26.4%  | -3.0%        | -2.9% | -1.9%                       | -2.0% | -0.1%                      | -0.1% | -1.8%                                         | -1.9% | -0.1%                        | -0.2% | -1.5%                                 | -1.6% | -2.6%     | -2.7% | -2.9%                   | -2.6% | -2.9%                                         |
| Turkmenistan                     | -2.7%              | -2.7% | -3.1%              | -3.1% | -2.7%                        | -2.7% | -3.3%   | -3.3% | 1.5%                                          | 0.9%  | -2.6%                       | -2.7% | -2.0%                     | -2.1% | -1.5%    | -1.1%  | -2.3%        | -2.4% | -1.7%                       | -1.7% | -0.0%                      | -0.1% | -0.9%                                         | -0.6% | -1.8%                        | -1.3% | -0.0%                                 | 0.3%  | -2.9%     | -2.7% | -1.4%                   | -1.6% | -0.9%                                         |
| Uzbekistan                       | -2.3%              | -2.3% | -3.1%              | -3.1% | -2.2%                        | -2.2% | -3.3%   | -3.3% | 1.9%                                          | 2.2%  | -2.6%                       | -2.7% | -2.4%                     | -2.4% | -0.2%    | 1.7%   | -2.0%        | -2.2% | -1.0%                       | -0.8% | -0.1%                      | -0.1% | -0.8%                                         | -1.0% | -2.1%                        | -2.1% | 0.7%                                  | 1.2%  | -3.0%     | -2.9% | -1.6%                   | -1.4% | -1.0%                                         |
| Viet Nam                         | -2.5%              | -2.5% | -2.5%              | -2.8% | -2.7%                        | -2.7% | -3.1%   | -3.1% | -1.6%                                         | -1.6% | -3.0%                       | -3.1% | -2.2%                     | -2.0% | 0.3%     | 13.2%  | -2.6%        | -2.5% | -2.7%                       | -2.6% | -0.1%                      | -0.1% | -1.2%                                         | -1.4% | -0.4%                        | -0.4% | -2.2%                                 | -2.5% | -2.5%     | -1.9% | -2.2%                   | -2.1% | -2.6%                                         |

0 to 24 years, percentage change in DALYs/100,000, for males and females, 1990 to 2019

|                          | Total communicable |       | Enteric infections |       | Lower respiratory infections |       | Malaria |       | Neonatal sepsis and other neonatal infections |       | Vaccine Preventable disease |       | Meningitis & Encephalitis |       | HIV/AIDS |       | Tuberculosis |       | Neglected Tropical diseases |       | Infectious skin conditions |       | Sexually transmitted infections excluding HIV |       | Upper respiratory infections |       | Other unspecified infectious diseases |       | Hepatitis |       | Rheumatic heart disease |       | Maternal sepsis and other maternal infections |      |
|--------------------------|--------------------|-------|--------------------|-------|------------------------------|-------|---------|-------|-----------------------------------------------|-------|-----------------------------|-------|---------------------------|-------|----------|-------|--------------|-------|-----------------------------|-------|----------------------------|-------|-----------------------------------------------|-------|------------------------------|-------|---------------------------------------|-------|-----------|-------|-------------------------|-------|-----------------------------------------------|------|
|                          | Female             | Male  | Female             | Male  | Female                       | Male  | Female  | Male  | Female                                        | Male  | Female                      | Male  | Female                    | Male  | Female   | Male  | Female       | Male  | Female                      | Male  | Female                     | Male  | Female                                        | Male  | Female                       | Male  | Female                                | Male  | Female    | Male  | Female                  | Male  | Female                                        | Male |
|                          |                    |       |                    |       |                              |       |         |       |                                               |       |                             |       |                           |       |          |       |              |       |                             |       |                            |       |                                               |       |                              |       |                                       |       |           |       |                         |       |                                               |      |
| American Samoa           | -1.4%              | -1.4% | -1.2%              | -1.0% | -1.9%                        | -1.9% |         |       | 0.0%                                          | -2.1% | -2.0%                       | -1.9% | -1.1%                     | -1.6% | 10.2%    | 8.3%  | -1.6%        | -2.3% | 1.0%                        | 1.2%  | -0.0%                      | 0.1%  | -1.8%                                         | -1.8% | -0.1%                        | -0.1% | -0.7%                                 | 0.6%  | 0.0%      | 0.4%  | -0.3%                   | -0.7% | -1.7%                                         |      |
| Antigua and Barbuda      | -1.2%              | -0.8% | -1.5%              | -0.7% | -1.2%                        | -0.5% |         |       | -1.4%                                         | -1.0% | -0.9%                       | -1.7% | -2.2%                     | -2.1% | -1.0%    | -0.5% | -2.1%        | -2.1% | -0.8%                       | -0.1% | -0.0%                      | 0.2%  | 0.0%                                          | -1.8% | -0.2%                        | -0.2% | -0.8%                                 | -0.1% | -2.2%     | -1.8% | -0.9%                   | -0.5% | -1.5%                                         |      |
| Argentina                | -1.8%              | -1.9% | -2.3%              | -2.2% | -2.1%                        | -2.0% | -3.3%   | -3.3% | -2.1%                                         | -2.2% | -1.9%                       | -1.9% | -2.4%                     | -2.4% | 1.7%     | 0.1%  | -2.6%        | -2.7% | -2.4%                       | -2.3% | -0.1%                      | 0.0%  | -1.0%                                         | -2.3% | -0.1%                        | -0.1% | -1.0%                                 | -0.8% | -2.0%     | -1.5% | -0.8%                   | -0.9% | -1.9%                                         |      |
| Bahamas                  | -1.2%              | -1.4% | -1.5%              | -1.6% | -2.1%                        | -1.8% |         |       | -0.9%                                         | -1.4% | -1.1%                       | -1.0% | -2.3%                     | -2.4% | 0.7%     | -0.3% | -2.2%        | -2.0% | -0.4%                       | -0.6% | -0.0%                      | -0.1% | -0.1%                                         | -0.6% | -0.4%                        | -0.1% | -0.3%                                 | -0.1% | -1.9%     | -1.6% | -0.6%                   | -0.6% | -1.7%                                         |      |
| Bahrain                  | -2.0%              | -1.9% | -1.0%              | -1.0% | -2.6%                        | -2.5% |         |       | -0.9%                                         | -2.2% | -3.1%                       | -3.1% | -2.6%                     | -2.4% | -1.4%    | -1.4% | -2.5%        | -2.5% | -1.8%                       | -1.9% | -0.8%                      | -0.5% | -1.3%                                         | -1.3% | -0.2%                        | -0.2% | 1.7%                                  | -1.6% | -2.0%     | -1.1% | -2.0%                   | -2.3% | -2.6%                                         |      |
| Barbados                 | -0.6%              | -1.0% | -0.7%              | -0.8% | -1.3%                        | -1.5% |         |       | 0.8%                                          | 0.3%  | -2.0%                       | -1.9% | -2.2%                     | -2.5% | -0.6%    | -2.0% | -2.2%        | -2.3% | 0.3%                        | 0.9%  | 0.0%                       | 0.0%  | -1.5%                                         | -1.6% | -0.2%                        | -0.1% | -0.8%                                 | -0.2% | -2.1%     | -1.9% | -1.0%                   | -0.9% | -1.7%                                         |      |
| Belarus                  | -1.7%              | -1.9% | -1.1%              | -1.3% | -2.9%                        | -2.9% |         |       | -0.8%                                         | -1.0% | -2.2%                       | -1.9% | -1.7%                     | -1.8% | 1.8%     | 2.3%  | -2.2%        | -2.0% | -1.3%                       | -1.4% | 0.1%                       | 0.0%  | -1.1%                                         | -1.9% | -0.5%                        | -0.7% | 1.7%                                  | 1.9%  | -1.5%     | -0.8% | -3.8%                   | -2.8% | -2.0%                                         |      |
| Bosnia and Herzegovina   | -1.4%              | -1.4% | -1.2%              | -1.1% | -2.5%                        | -2.3% |         |       | -0.3%                                         | -0.5% | -1.8%                       | -1.7% | -2.1%                     | -2.2% | 1.2%     | -0.3% | -2.6%        | -2.3% | -1.6%                       | -1.8% | -0.1%                      | 0.0%  | -1.5%                                         | -1.5% | -0.3%                        | -0.2% | 1.3%                                  | -1.0% | -1.2%     | -0.9% | -2.4%                   | -2.2% | -2.8%                                         |      |
| Bulgaria                 | -1.9%              | -2.0% | -0.9%              | -1.0% | -2.5%                        | -2.5% |         |       | 14.6%                                         | 16.4% | 4.3%                        | 3.7%  | -1.8%                     | -1.9% | 2.1%     | 1.7%  | -2.1%        | -2.2% | -1.8%                       | -2.3% | 0.1%                       | 0.0%  | -0.6%                                         | -0.4% | -0.3%                        | -0.4% | -1.3%                                 | -1.0% | -1.2%     | -0.9% | -2.4%                   | -2.6% | -2.4%                                         |      |
| Chile                    | -2.2%              | -2.4% | -1.8%              | -2.0% | -3.0%                        | -3.1% |         |       | -1.9%                                         | -2.1% | 0.6%                        | 0.3%  | -2.6%                     | -2.7% | 4.2%     | 2.8%  | -2.6%        | -2.8% | -2.5%                       | -2.4% | -0.0%                      | -0.0% | -1.2%                                         | -2.2% | -0.4%                        | -0.4% | -0.5%                                 | -0.4% | -2.2%     | -1.6% | -2.6%                   | -2.7% | -2.8%                                         |      |
| Cook Islands             | -2.3%              | -2.3% | -1.1%              | -0.9% | -3.0%                        | -2.9% |         |       | -1.9%                                         | -1.9% | -2.6%                       | -2.5% | -2.2%                     | -2.1% | 47.9%    | 41.3% | -2.4%        | -2.4% | -2.9%                       | -3.0% | -0.0%                      | -0.0% | -1.7%                                         | -1.5% | -0.2%                        | -0.2% | -1.1%                                 | -1.2% | -1.2%     | -1.0% | -2.3%                   | -2.0% | -1.1%                                         |      |
| Croatia                  | -0.9%              | -1.0% | -0.7%              | -1.0% | -2.7%                        | -2.7% |         |       | 4.0%                                          | 4.4%  | -1.0%                       | -0.6% | -1.5%                     | -2.5% | 5.6%     | 10.1% | -2.6%        | -2.9% | -1.3%                       | -1.4% | -0.0%                      | -0.0% | -0.1%                                         | 0.0%  | -0.1%                        | -0.1% | -0.9%                                 | -0.9% | -1.1%     | -1.2% | -2.7%                   | -2.6% | -2.2%                                         |      |
| Dominica                 | -0.3%              | -0.4% | -1.3%              | -1.4% | 0.1%                         | 0.1%  |         |       | 0.4%                                          | 0.1%  | 2.9%                        | 3.4%  | -1.6%                     | -1.7% | 0.5%     | 0.1%  | -1.8%        | -1.4% | -0.6%                       | -0.9% | -0.0%                      | -0.0% | -0.7%                                         | -0.7% | -0.4%                        | -0.2% | 0.1%                                  | 1.0%  | -2.3%     | -1.6% | -0.7%                   | -0.6% | -0.6%                                         |      |
| Georgia                  | -2.5%              | -2.6% | -2.1%              | -2.3% | -3.1%                        | -3.1% | -3.3%   | -3.3% | 3.1%                                          | 2.1%  | 1.2%                        | 0.7%  | -1.8%                     | -2.0% | 20.3%    | 44.3% | -2.2%        | -2.3% | -0.2%                       | 0.2%  | 0.1%                       | 0.1%  | -0.3%                                         | -0.2% | -0.1%                        | -0.3% | 0.5%                                  | 1.3%  | -1.7%     | -0.9% | -1.0%                   | -0.9% | -0.2%                                         |      |
| Greece                   | -0.5%              | -0.8% | 0.1%               | 0.1%  | -0.7%                        | -1.1% |         |       | -2.9%                                         | -2.9% | -2.4%                       | -2.1% | -1.6%                     | -1.5% | 0.7%     | -1.8% | -2.2%        | -2.3% | -1.0%                       | -1.0% | 0.0%                       | 0.0%  | -0.3%                                         | -0.6% | -0.0%                        | -0.0% | -0.0%                                 | 0.0%  | -0.5%     | -0.6% | -1.8%                   | -2.1% | -2.3%                                         |      |
| Greenland                | -2.0%              | -2.1% | -0.1%              | 0.1%  | -2.8%                        | -2.9% |         |       | -0.4%                                         | -1.4% | -2.4%                       | -2.4% | -2.9%                     | -2.9% | 2.8%     | 0.7%  | -2.9%        | -2.9% | -1.1%                       | -1.0% | 0.1%                       | 0.1%  | -1.1%                                         | -1.2% | -0.1%                        | -0.0% | 1.5%                                  | -1.9% | -1.8%     | -2.0% | -2.6%                   | -2.1% | -1.7%                                         |      |
| Hungary                  | -1.6%              | -1.7% | -0.5%              | -0.4% | -2.6%                        | -2.7% |         |       | -1.9%                                         | -0.2% | -2.0%                       | -1.7% | -2.6%                     | -2.7% | -2.7%    | -2.7% | -2.5%        | -2.5% | -1.2%                       | -1.3% | 0.0%                       | 0.0%  | -0.2%                                         | -0.2% | 1.1%                         | -1.3% | -1.0%                                 | -1.0% | -1.6%     | -1.8% | -2.5%                   | -2.8% | -2.1%                                         |      |
| Israel                   | -1.1%              | -1.2% | 0.1%               | 0.2%  | -2.6%                        | -2.4% |         |       | -1.9%                                         | -1.6% | -0.3%                       | 0.1%  | -2.4%                     | -2.5% | -2.2%    | -1.8% | -2.7%        | -2.8% | -1.8%                       | -1.3% | 0.0%                       | 0.0%  | -0.4%                                         | -1.5% | -0.0%                        | -0.0% | -0.3%                                 | 0.1%  | -2.4%     | -2.1% | -2.3%                   | -2.0% | -2.2%                                         |      |
| Italy                    | -0.9%              | -1.2% | 0.5%               | 0.4%  | -2.7%                        | -2.7% |         |       | -0.9%                                         | -0.7% | -2.5%                       | -2.0% | -2.1%                     | -2.2% | -2.5%    | -2.9% | -2.5%        | -2.6% | -0.9%                       | -0.9% | 0.2%                       | 0.1%  | -0.3%                                         | -2.4% | -0.1%                        | -0.1% | -0.2%                                 | -0.4% | -0.9%     | -1.2% | -2.1%                   | -2.2% | -1.8%                                         |      |
| Jordan                   | -2.2%              | -2.2% | -1.9%              | -1.8% | -2.4%                        | -2.5% |         |       | -1.8%                                         | -1.4% | -2.9%                       | -2.9% | -2.2%                     | -2.1% | 5.4%     | 5.4%  | -2.9%        | -2.8% | -1.9%                       | -2.2% | -0.3%                      | -0.1% | -1.3%                                         | -1.2% | -0.2%                        | -0.2% | 1.7%                                  | -1.8% | -2.2%     | -2.4% | -2.6%                   | -2.2% | -2.5%                                         |      |
| Kazakhstan               | -2.6%              | -2.6% | -2.9%              | -3.0% | -2.9%                        | -2.9% |         |       | 0.6%                                          | 0.1%  | -1.9%                       | -2.0% | -2.0%                     | -2.1% | 4.1%     | 0.8%  | -2.6%        | -2.4% | -1.5%                       | -1.0% | 0.1%                       | 0.1%  | -0.9%                                         | -1.2% | -0.8%                        | -0.4% | 1.9%                                  | 3.5%  | -2.8%     | -2.6% | -2.9%                   | -2.8% | -0.8%                                         |      |
| Lebanon                  | -2.3%              | -2.2% | -1.6%              | -1.4% | -2.8%                        | -2.6% |         |       | -1.4%                                         | -1.3% | -2.9%                       | -2.9% | -2.5%                     | -2.3% | 0.5%     | 0.3%  | -2.8%        | -2.7% | -2.4%                       | -2.6% | -0.0%                      | -0.0% | -0.7%                                         | -0.6% | -0.1%                        | -0.1% | 1.5%                                  | 1.6%  | -2.5%     | -2.0% | -1.7%                   | -2.4% | -2.5%                                         |      |
| Libya                    | -2.5%              | -2.6% | -2.4%              | -2.3% | -2.8%                        | -2.9% |         |       | -2.2%                                         | -2.3% | -3.1%                       | -3.1% | -2.6%                     | -2.7% | 10.1%    | 6.2%  | -2.6%        | -2.5% | -1.1%                       | -1.3% | -0.2%                      | -0.2% | -1.3%                                         | -1.4% | -0.1%                        | -0.1% | -1.2%                                 | -1.7% | -2.5%     | -2.2% | -2.3%                   | -2.3% | -2.7%                                         |      |
| Malaysia                 | -2.0%              | -1.9% | -1.8%              | -1.9% | -2.5%                        | -2.4% | -3.2%   | -3.2% | -1.7%                                         | -1.8% | -3.0%                       | -3.0% | -2.2%                     | -2.2% | 77.6%    | 62.7% | -2.0%        | -2.2% | -1.8%                       | -1.9% | -0.1%                      | -0.1% | -1.7%                                         | -1.6% | -0.3%                        | -0.3% | -0.8%                                 | 0.3%  | -1.2%     | -0.6% | -2.0%                   | -2.1% | -2.8%                                         |      |
| Malta                    | -0.8%              | -1.0% | -0.0%              | -0.1% | -1.7%                        | -1.7% |         |       | -0.5%                                         | -0.8% | -2.1%                       | -1.9% | -1.9%                     | -2.0% | -1.0%    | -1.9% | -1.4%        | -1.3% | -1.8%                       | -1.8% | -0.3%                      | -0.0% | 0.2%                                          | -0.5% | -0.2%                        | -0.4% | -0.7%                                 | -0.6% | -0.5%     | -0.4% | -1.0%                   | -1.4% | -1.4%                                         |      |
| Mauritius                | -1.4%              | -1.1% | -2.2%              | -2.3% | -2.3%                        | -2.0% |         |       | -0.9%                                         | 0.5%  | -1.6%                       | -1.9% | -1.9%                     | -1.7% | 9.1%     | 22.7% | -1.7%        | -2.0% | -0.3%                       | -0.1% | -0.0%                      | 0.0%  | -0.0%                                         | 0.1%  | -0.3%                        | -0.3% | 1.2%                                  | -1.0% | -1.7%     | -1.2% | -2.1%                   | -1.9% | -1.9%                                         |      |
| Montenegro               | -1.7%              | -1.5% | -0.7%              | -0.9% | -2.9%                        | -2.6% |         |       | -1.3%                                         | -1.3% | -2.0%                       | -1.7% | -2.3%                     | -2.2% | 7.3%     | 7.5%  | -2.5%        | -2.5% | -0.8%                       | -1.0% | -0.1%                      | -0.1% | -0.7%                                         | -0.7% | -0.2%                        | -0.0% | -1.2%                                 | -1.3% | -0.6%     | -0.8% | -1.7%                   | -2.0% | -1.7%                                         |      |
| Niue                     | -0.9%              | -1.0% | -1.3%              | -1.3% | -1.2%                        | -1.3% |         |       | -0.6%                                         | -0.8% | -1.6%                       | -1.4% | -2.0%                     | -2.0% | 44.2%    | 38.4% | -2.0%        | -2.1% | 0.8%                        | -0.3% | -0.1%                      | -0.1% | 0.0%                                          | -0.1% | -0.1%                        | -0.2% | -0.9%                                 | -0.4% | -1.4%     | -1.4% | -0.7%                   | -0.6% | -1.6%                                         |      |
| North Macedonia          | -2.6%              | -2.6% | -2.9%              | -2.9% | -3.0%                        | -3.0% |         |       | 14.2%                                         | 18.3% | -1.5%                       | -1.3% | -2.8%                     | -2.8% | 25.6%    | 23.7% | -3.1%        | -3.0% | -1.5%                       | -1.4% | -0.1%                      | -0.1% | -0.5%                                         | -0.5% | -0.0%                        | -0.2% | 1.7%                                  | -1.9% | -1.1%     | -0.9% | -2.6%                   | -2.4% | -2.4%                                         |      |
| Northern Mariana Islands | -0.8%              | -1.0% | -0.4%              | -0.5% | -1.6%                        | -1.7% |         |       | 0.6%                                          | -1.3% | -1.2%                       | -1.1% | -0.4%                     | -0.6% | 12.2%    | 8.3%  | -1.8%        | -2.4% | 1.7%                        | 2.0%  | 0.1%                       | 0.1%  | -1.3%                                         | -1.6% | -0.0%                        | -0.1% | 0.1%                                  | 0.6%  | -0.9%     | -0.6% | -0.7%                   | 0.2%  | -1.8%                                         |      |
| Oman                     | -2.6%              | -2.5% | -2.1%              | -2.2% | -2.8%                        | -2.7% | -3.3%   | -3.3% | -1.8%                                         | -1.6% | -3.1%                       | -3.2% | -2.2%                     | -1.9% | 9.1%     | 8.2%  | -2.8%        | -2.8% | -2.3%                       | -2.4% | -0.2%                      | 0.2%  | -1.6%                                         | -1.6% | -0.3%                        | -0.2% | -2.0%                                 | -2.1% | -2.6%     | -1.7% | -2.6%                   | -2.4% | -2.6%                                         |      |
| Palau                    | -1.8%              | -1.8% | -1.5%              | -1.6% | -2.1%                        | -2.2% |         |       | -1.0%                                         | -1.7% | -2.1%                       | -2.1% | -2.2%                     | -1.8% | 41.3%    | 34.4% | -1.9%        | -2.1% | 1.0%                        | 1.5%  | -0.0%                      | -0.0% | -0.3%                                         | -0.5% | -0.0%                        | -0.1% | -0.9%                                 | -0.7% | -1.5%     | -1.7% | -1.3%                   | -1.1% | -1.5%                                         |      |
| Poland                   | -1.8%              | -2.0% | -0.8%              | -0.9% | -2.6%                        | -2.6% |         |       | -2.6%                                         | -2.7% | -2.2%                       | -2.1% | -2.8%                     | -2.9% | 10.1%    | 9.2%  | -2.6%        | -2.7% | -1.5%                       | -1.5% | -0.1%                      | -0.1% | 0.2%                                          | -0.4% | -0.5%                        | -0.7% | -1.5%                                 | -1.5% | -1.3%     | -1.4% | -2.8%                   | -2.9% | -2.3%                                         |      |
| Portugal                 | -1.7%              | -2.0% | -0.9%              | -1.4% | -2.7%                        | -2.8% |         |       | -2.2%                                         | -2.2% | -2.0%                       | -2.6% | -2.8%                     | -2.8% | 1.4%     | -1.7% | -2.7%        | -2.9% | -2.0%                       | -1.9% | -0.0%                      | -0.1% | 1.6%                                          | -2.6% | -0.5%                        | -0.6% | -1.2%                                 | -1.2% | -1.9%     | -2.0% | -2.8%                   | -2.8% | -2.1%                                         |      |
| Republic of Moldova      | -2.1%              | -2.2% | -2.2%              | -2.4% | -2.6%                        | -2.6% |         |       | -0.5%                                         | -0.6% | -1.8%                       | -1.5% | -2.7%                     | -2.8% | 23.7%    | 2.5%  | -2.0%        | -2.0% | -1.5%                       | -1.7% | -0.2%                      | -0.3% | -1.8%                                         | -0.2% | -0.9%                        | -0.4% | 1.1%                                  | 1.2%  | -3.0%     | -2.9% | -2.7%                   | -2.7% | -2.5%                                         |      |
| Romania                  | -2.5%              | -2.5% | -1.9%              | -2.0% | -2.7%                        | -2.6% |         |       | -1.1%                                         | -0.7% | -1.4%                       | -2.2% | -2.9%                     | -2.9% | -2.5%    | -2.5% | -2.3%        | -2.5% | -1.9%                       | -2.2% | 0.1%                       | 0.0%  | -1.3%                                         | -0.5% | -0.9%                        | -0.9% | -2.4%                                 | -2.3% | -2.9%     | -2.9% | -2.7%                   | -2.6% | -2.5%                                         |      |
| Russian Federation       | -1.4%              | -1.7% | -1.1%              | -1.5% | -2.4%                        | -2.5% |         |       | -0.2%                                         | -0.5% | -2.3%                       | -2.1% | -2.1%                     | -2.3% | 5.2%     | 2.7%  | -1.5%        | -2.0% | -1.1%                       | -1.2% | -0.0%                      | 0.0%  | -1.0%                                         | -1.0% | -0.9%                        | -1.1% | -0.7%                                 | -0.6% | -1.7%     | -1.3% | -2.6%                   | -2.8% | -2.4%                                         |      |
| Saint Kitts and Nevis    | -1.6%              | -1.3% | -2.4%              | -2.4% | -2.0%                        | -1.8% |         |       | -0.0%                                         | -0.1% | -2.3%                       | -1.7% | -2.6%                     | -2.6% | 11.9%    | 9.5%  | -2.6%        | -2.3% | -0.7%                       | -0.8% | -0.1%                      | -0.1% | -2.0%                                         | -2.2% | -0.3%                        | -0.7% | -1.0%                                 | -0.5% | -2.7%     | -1.6% | -2.3%                   | -1.8% | -1.6%                                         |      |
| Saudi Arabia             | -2.9%              | -2.9% | -2.9%              | -2.9% | -2.8%                        | -2.8% | -3.3%   | -3.2% | -2.7%                                         | -2.7% | -3.3%                       | -3.3% | -2.6%                     | -2.7% | 3.1%     | 2.6%  | -2.7%        | -2.6% | -2.4%                       | -2.5% | -0.2%                      | -0.2% | -2.0%                                         | -2.1% | -0.2%                        | -0.2% | -1.5%                                 | -1.8% | -2.3%     | -1.9% | -2.6%                   | -2.7% | -2.7%                                         |      |
| Serbia                   | -2.2%              | -2.4% | -0.8%              | -0.7% | -3.1%                        | -3.1% |         |       | -2.6%                                         | -2.6% | -2.5%                       | -2.4% | -2.7%                     | -2.9% | 1.9%     | 1.7%  | -2.9%        | -3.0% | -2.1%                       | -2.4% | -0.3%                      | -0.0% | -1.4%                                         | -1.7% | -0.1%                        | -0.1% | -1.7%                                 | -1.8% | -1.7%     | -1.8% | -2.7%                   | -2.7% | -2.2%                                         |      |
| Seychelles               | -1.3%              | -1.3% | -1.3%              | -1.1% | -0.6%                        | -0.4% |         |       | -0.4%                                         | -0.9% | -2.3%                       | -2.3% | -3.0%                     | -2.9% | 10.3%    | 5.8%  | -1.3%        | -1.7% | 0.6%                        | 1.1%  | -0.0%                      | 0.0%  | -0.7%                                         | -0.5% | -0.2%                        | -0.2% | -0.2%                                 | 2.7%  | -2.0%     | -1.5% | -1.8%                   | -2.0% | -1.9%                                         |      |
| Spain                    | -1.0%              | -1.5% | -0.1%              | -0.2% | -2.4%                        | -2.7% |         |       | -0.7%                                         | -0.8% | -0.5%                       | -0.6% | -1.5%                     | -2.5% | -2.9%    | -3.1% | -2.7%        | -3.0% | -1.9%                       | -1.7% | 0.2%                       | 0.1%  | -1.3%                                         | -2.9% | -0.0%                        | -0.0% | -0.4%                                 | -0.5% | -1.5%     | -2.2% | -2.4%                   | -2.6% | -1.9%                                         |      |
| Sri Lanka                | -2.3%              | -2.2% | -2.3%              | -2.4% | -2.6%                        | -2.5% | -3.3%   | -3.3% | -0.3%                                         | -0.5% | -3.1%                       | -3.1% | -2.5%                     | -2.5% | 0.6%     | 1.5%  | -2.5%        | -2.5% | -1.6%                       | -1.8% | -0.1%                      | -0.0% | -1.4%                                         | -1.4% | -0.3%                        | -0.3% | 1.8%                                  | -1.4% | -1.9%     | -1.7% | -2.5%                   | -2.4% | -2.7%                                         |      |
| Trinidad and Tobago      | -1.3%              | -1.4% | -1.7%              | -1    |                              |       |         |       |                                               |       |                             |       |                           |       |          |       |              |       |                             |       |                            |       |                                               |       |                              |       |                                       |       |           |       |                         |       |                                               |      |

0 to 24 years, percentage change in DALYs/100,000, for males and females, 1990 to 2019

|                            | Total communicable |       | Enteric infections |       | Lower respiratory infections |       | Malaria |       | Neonatal sepsis and other neonatal infections |       | Vaccine Preventable disease |       | Meningitis & Encephalitis |       | HIV/AIDS |        | Tuberculosis |       | Neglected Tropical diseases |       | Infectious skin conditions |       | Sexually transmitted infections excluding HIV |       | Upper respiratory infections |       | Other unspecified infectious diseases |       | Hepatitis |       | Rheumatic heart disease |       | Maternal sepsis and other maternal infections |
|----------------------------|--------------------|-------|--------------------|-------|------------------------------|-------|---------|-------|-----------------------------------------------|-------|-----------------------------|-------|---------------------------|-------|----------|--------|--------------|-------|-----------------------------|-------|----------------------------|-------|-----------------------------------------------|-------|------------------------------|-------|---------------------------------------|-------|-----------|-------|-------------------------|-------|-----------------------------------------------|
|                            | Female             | Male  | Female             | Male  | Female                       | Male  | Female  | Male  | Female                                        | Male  | Female                      | Male  | Female                    | Male  | Female   | Male   | Female       | Male  | Female                      | Male  | Female                     | Male  | Female                                        | Male  | Female                       | Male  | Female                                | Male  | Female    | Male  | Female                  |       |                                               |
|                            |                    |       |                    |       |                              |       |         |       |                                               |       |                             |       |                           |       |          |        |              |       |                             |       |                            |       |                                               |       |                              |       |                                       |       |           |       |                         |       |                                               |
| Andorra                    | -1.2%              | -1.2% | -0.2%              | -0.4% | -2.5%                        | -2.5% |         |       | 4.6%                                          | -1.7% | -3.1%                       | -3.1% | -2.0%                     | -2.3% | -0.6%    | -0.6%  | -2.4%        | -2.2% | -1.4%                       | -1.0% | 0.1%                       | 0.0%  | -1.2%                                         | -1.1% | -0.1%                        | -0.1% | -1.4%                                 | -1.4% | -2.3%     | -2.1% | -2.1%                   | -1.7% | -1.9%                                         |
| Australia                  | 0.7%               | -1.0% | 0.3%               | 0.5%  | -1.9%                        | -2.0% |         |       | -2.2%                                         | -2.5% | -0.4%                       | -0.0% | -2.2%                     | -2.4% | -0.3%    | -2.9%  | -1.7%        | -2.1% | -1.0%                       | -1.0% | 0.0%                       | 0.0%  | -1.0%                                         | -1.9% | -0.1%                        | -0.1% | 0.2%                                  | -0.4% | -0.7%     | -0.7% | -2.0%                   | -2.1% | -1.0%                                         |
| Austria                    | -0.6%              | -1.0% | 0.3%               | 0.3%  | -2.6%                        | -2.6% |         |       | 1.5%                                          | -0.5% | 1.2%                        | 1.1%  | -2.0%                     | -2.3% | -1.1%    | -2.0%  | -2.4%        | -2.2% | -1.4%                       | -1.4% | 0.1%                       | -0.0% | -0.5%                                         | -0.6% | -0.1%                        | -0.2% | 1.1%                                  | 0.5%  | -0.8%     | -1.1% | -2.0%                   | -2.1% | -2.0%                                         |
| Belgium                    | -0.6%              | -0.9% | 0.1%               | 0.0%  | -1.9%                        | -2.1% |         |       | -1.0%                                         | -2.0% | -1.7%                       | -1.6% | -1.8%                     | -1.8% | -2.1%    | -2.3%  | -2.3%        | -2.2% | -1.6%                       | -1.2% | 0.1%                       | 0.0%  | -0.7%                                         | -1.6% | -0.1%                        | -0.1% | 0.3%                                  | 0.1%  | -1.4%     | -1.3% | -0.8%                   | -1.5% | -2.0%                                         |
| Bermuda                    | -1.3%              | -1.5% | -0.1%              | -0.9% | -1.9%                        | -2.3% |         |       | -1.7%                                         | -0.9% | -0.9%                       | -0.8% | -2.5%                     | -2.7% | -1.3%    | -2.2%  | -2.3%        | -2.3% | -1.3%                       | -0.8% | 0.0%                       | -0.0% | -0.9%                                         | -0.8% | -0.1%                        | -0.1% | -1.3%                                 | -1.1% | -1.6%     | -1.3% | -2.6%                   | -2.4% | -2.7%                                         |
| Brunei Darussalam          | -0.8%              | -1.2% | -0.6%              | -0.8% | -0.6%                        | -1.3% |         |       | -0.2%                                         | -0.4% | -2.1%                       | -2.4% | -1.9%                     | -1.9% | 9.4%     | 14.2%  | -2.3%        | -2.7% | -0.9%                       | -1.8% | -0.1%                      | -0.0% | -0.6%                                         | -0.9% | -0.3%                        | -0.2% | -0.1%                                 | -0.3% | -1.7%     | -1.9% | -1.7%                   | -2.5% | -2.0%                                         |
| Canada                     | 0.3%               | -0.6% | 1.0%               | 0.8%  | -1.9%                        | -2.1% |         |       | -0.1%                                         | -1.0% | -0.3%                       | -0.6% | -2.0%                     | -1.8% | 0.5%     | -2.6%  | -1.5%        | -1.6% | -1.1%                       | -1.1% | 0.0%                       | 0.0%  | -0.2%                                         | -0.4% | -0.1%                        | -0.1% | -0.4%                                 | -0.4% | -0.5%     | -0.5% | -1.6%                   | -1.5% | -1.8%                                         |
| Cyprus                     | -1.5%              | -1.7% | -0.3%              | -0.4% | -2.8%                        | -2.8% |         |       | -2.2%                                         | -2.3% | -3.1%                       | -3.1% | -2.8%                     | -2.9% | 55.6%    | 10.7%  | -2.4%        | -3.0% | -2.3%                       | -2.3% | -0.1%                      | -0.1% | -1.8%                                         | -1.9% | -0.1%                        | -0.1% | -1.5%                                 | -1.8% | -1.1%     | -1.1% | -2.1%                   | -2.3% | -3.0%                                         |
| Czechia                    | -0.9%              | -1.0% | -0.5%              | -0.4% | -2.3%                        | -2.3% |         |       | 3.8%                                          | 5.0%  | 1.8%                        | 1.3%  | -2.2%                     | -2.2% | -2.4%    | -2.5%  | -1.1%        | -1.2% | 0.1%                        | 0.1%  | -0.7%                      | -0.8% | -0.5%                                         | -0.5% | -1.1%                        | -1.0% | -1.1%                                 | -1.4% | -2.1%     | -2.3% | -2.6%                   | -2.8% | -2.5%                                         |
| Denmark                    | -0.9%              | -1.1% | 0.0%               | -0.0% | -2.4%                        | -2.4% |         |       | -0.3%                                         | -1.2% | -1.1%                       | -1.8% | -2.8%                     | -2.8% | 9.5%     | 3.0%   | -2.4%        | -2.3% | -1.5%                       | -1.1% | 0.1%                       | 0.0%  | -0.6%                                         | -0.4% | -0.0%                        | -0.1% | -0.4%                                 | -0.2% | -1.4%     | -0.4% | -2.1%                   | -2.5% | -1.9%                                         |
| Estonia                    | -1.4%              | -2.0% | 0.5%               | -0.7% | -2.4%                        | -2.7% |         |       | -2.0%                                         | -2.6% | -2.7%                       | -2.6% | -2.6%                     | -2.6% | 138.5%   | 140.6% | -2.3%        | -2.6% | -1.3%                       | -1.6% | -0.0%                      | -0.1% | -1.2%                                         | -2.4% | -0.2%                        | -0.2% | 0.9%                                  | 0.1%  | -2.0%     | -2.0% | -2.3%                   | -3.0% | -2.5%                                         |
| Finland                    | 0.9%               | -1.1% | -0.5%              | -0.5% | -2.8%                        | -2.9% |         |       | -1.7%                                         | -1.4% | -0.9%                       | -0.9% | -2.2%                     | -2.5% | -2.8%    | -2.2%  | -1.8%        | -2.5% | -1.8%                       | -1.5% | 0.0%                       | -0.1% | -0.6%                                         | -0.4% | -0.1%                        | -0.1% | -1.0%                                 | -1.1% | -0.9%     | -0.4% | -1.8%                   | -2.3% | -2.2%                                         |
| France                     | -0.9%              | -1.3% | -0.8%              | -1.0% | -2.2%                        | -2.4% |         |       | -1.5%                                         | -1.6% | -1.6%                       | -1.7% | -2.1%                     | -2.3% | -2.6%    | -3.1%  | -2.4%        | -2.5% | -1.6%                       | -1.7% | 0.1%                       | 0.0%  | -0.4%                                         | -1.3% | -0.3%                        | -0.5% | -0.9%                                 | -0.9% | -0.9%     | -1.4% | -1.7%                   | -1.9% | -1.7%                                         |
| Germany                    | -0.7%              | -1.1% | 0.1%               | -0.0% | -2.1%                        | -2.2% |         |       | -1.4%                                         | -1.8% | -1.1%                       | -1.5% | -2.4%                     | -2.5% | -2.6%    | -2.8%  | -2.5%        | -2.3% | -1.4%                       | -1.5% | 0.1%                       | -0.0% | -0.8%                                         | -1.0% | -0.2%                        | -0.3% | -1.1%                                 | -1.0% | -1.4%     | -1.7% | -1.8%                   | -2.1% | -2.6%                                         |
| Guam                       | -0.5%              | -0.5% | -0.1%              | -0.4% | -0.7%                        | -0.8% |         |       | -0.6%                                         | 0.1%  | -1.0%                       | -0.8% | -0.5%                     | -1.1% | 12.9%    | 9.9%   | -1.2%        | -2.0% | -0.6%                       | -0.3% | 0.1%                       | 0.1%  | -0.7%                                         | -0.7% | -0.0%                        | -0.0% | -0.1%                                 | 0.1%  | -0.1%     | -0.9% | -0.6%                   | -1.3% | -1.3%                                         |
| Iceland                    | -1.0%              | -1.5% | -0.2%              | -0.3% | -2.2%                        | -2.3% |         |       | -1.7%                                         | -2.3% | 1.1%                        | 0.8%  | -2.5%                     | -2.4% | -2.3%    | -2.3%  | -2.5%        | -2.3% | -1.4%                       | -1.0% | 0.0%                       | 0.0%  | -0.3%                                         | -1.8% | -0.1%                        | -0.2% | -0.8%                                 | -0.8% | -0.2%     | -0.2% | -1.4%                   | -1.9% | -2.0%                                         |
| Ireland                    | -0.8%              | -1.0% | 0.2%               | 0.2%  | -2.4%                        | -2.6% |         |       | 1.6%                                          | 0.7%  | -2.1%                       | -2.1% | -2.6%                     | -2.6% | -0.3%    | -1.9%  | -2.1%        | -2.4% | -1.8%                       | -1.3% | 0.0%                       | -0.0% | -0.4%                                         | -0.7% | -0.1%                        | -0.1% | -0.4%                                 | -0.7% | -0.6%     | -0.4% | -2.2%                   | -1.9% | -1.4%                                         |
| Japan                      | -0.7%              | -0.9% | -0.9%              | -1.0% | -1.9%                        | -1.9% |         |       | -1.7%                                         | -1.6% | -2.3%                       | -2.4% | -1.9%                     | -2.0% | 4.8%     | 5.1%   | -2.3%        | -2.5% | -1.3%                       | -1.2% | 0.0%                       | 0.0%  | 0.4%                                          | -0.4% | -0.1%                        | -0.1% | -0.5%                                 | -0.4% | -1.0%     | -1.5% | -1.7%                   | -2.0% | -1.3%                                         |
| Kuwait                     | -1.7%              | -1.6% | -1.3%              | -1.0% | -2.3%                        | -2.2% |         |       | -1.9%                                         | -1.8% | -2.7%                       | -2.7% | -2.2%                     | -2.1% | 0.0%     | -2.3%  | -2.7%        | -2.7% | -1.2%                       | -1.2% | -0.1%                      | -0.1% | -0.0%                                         | -0.2% | -0.1%                        | -0.1% | -1.0%                                 | -0.9% | -2.1%     | -1.9% | -2.9%                   | -2.6% | -1.8%                                         |
| Latvia                     | -1.6%              | -1.8% | -0.8%              | -0.8% | -2.2%                        | -2.5% |         |       | -1.8%                                         | -1.2% | -1.9%                       | -1.6% | -2.6%                     | -2.8% | 8.1%     | 1.4%   | -2.4%        | -2.5% | -1.1%                       | -0.5% | 0.0%                       | 0.0%  | -1.2%                                         | -1.5% | -0.1%                        | -0.1% | 0.5%                                  | 2.7%  | -3.0%     | -3.0% | -2.7%                   | -3.0% | -2.5%                                         |
| Lithuania                  | -0.9%              | -1.2% | -0.3%              | -0.8% | -1.7%                        | -2.0% |         |       | 7.3%                                          | 3.9%  | -2.3%                       | -2.0% | -2.5%                     | -2.6% | 0.9%     | 17.4%  | -2.0%        | -2.1% | -0.7%                       | -1.1% | 0.0%                       | -0.0% | -0.2%                                         | -1.4% | -0.3%                        | -0.5% | 0.3%                                  | 0.5%  | -1.9%     | -1.6% | -2.7%                   | -2.8% | -2.5%                                         |
| Luxembourg                 | -0.9%              | -1.3% | -0.2%              | -0.3% | -2.4%                        | -2.6% |         |       | -2.2%                                         | -2.3% | -2.0%                       | -2.2% | -2.3%                     | -2.6% | -1.9%    | -2.7%  | -2.2%        | -2.3% | -1.9%                       | -1.5% | 0.1%                       | 0.0%  | -0.8%                                         | -2.6% | -0.1%                        | -0.2% | -1.2%                                 | -1.2% | -0.7%     | -1.5% | -1.8%                   | -2.3% | -2.4%                                         |
| Monaco                     | -0.8%              | -1.1% | 0.1%               | -0.0% | -2.2%                        | -2.2% |         |       | -1.4%                                         | -1.2% | -1.1%                       | -1.1% | -2.0%                     | -2.5% | -2.2%    | -2.4%  | -2.4%        | -2.5% | -1.2%                       | -0.9% | 0.2%                       | 0.0%  | -1.4%                                         | -1.3% | 0.0%                         | -0.0% | -0.8%                                 | -0.7% | -0.4%     | -0.5% | -1.2%                   | -1.6% | -2.2%                                         |
| Netherlands                | -0.6%              | -1.0% | 0.2%               | 0.1%  | -1.9%                        | -2.1% |         |       | 0.5%                                          | -0.8% | 1.3%                        | 0.8%  | -2.3%                     | -2.4% | -1.9%    | -2.9%  | -2.3%        | -2.3% | -1.3%                       | -0.4% | 0.1%                       | 0.0%  | -0.6%                                         | -0.6% | -0.3%                        | -0.4% | 0.3%                                  | 0.1%  | -0.3%     | -0.3% | -1.4%                   | -1.6% | -1.7%                                         |
| New Zealand                | -0.9%              | -1.3% | 0.1%               | -0.0% | -2.6%                        | -2.8% |         |       | 0.7%                                          | 2.0%  | -1.6%                       | -1.7% | -1.9%                     | -2.3% | -1.9%    | -2.7%  | -2.3%        | -2.3% | -1.0%                       | -0.7% | 0.1%                       | 0.0%  | 0.2%                                          | -0.5% | -0.1%                        | -0.2% | -0.3%                                 | -0.7% | -0.9%     | -0.8% | -2.2%                   | -2.4% | -1.3%                                         |
| Norway                     | -0.8%              | -1.3% | -0.0%              | -0.1% | -2.7%                        | -2.7% |         |       | -0.5%                                         | -2.0% | -1.5%                       | -1.4% | -2.7%                     | -2.7% | 3.6%     | -2.6%  | -2.1%        | -2.5% | -1.2%                       | -1.2% | 0.1%                       | 0.0%  | -0.6%                                         | 0.3%  | -0.2%                        | -0.1% | -0.0%                                 | -0.2% | -0.5%     | -0.4% | -2.2%                   | -2.6% | -2.3%                                         |
| Puerto Rico                | -1.2%              | -1.2% | 0.6%               | 0.7%  | -2.3%                        | -2.4% |         |       | -0.8%                                         | 0.2%  | -1.7%                       | -1.6% | -2.6%                     | -2.8% | -2.3%    | -2.6%  | -2.5%        | -2.5% | -0.8%                       | -0.3% | -0.1%                      | -0.1% | 0.1%                                          | 0.4%  | -0.2%                        | -0.2% | -0.6%                                 | -0.3% | -1.4%     | -1.3% | -2.5%                   | -1.5% | -2.5%                                         |
| Qatar                      | -2.5%              | -2.5% | -1.6%              | -1.7% | -2.6%                        | -2.7% |         |       | -2.0%                                         | -2.1% | -3.2%                       | -3.2% | -2.7%                     | -2.4% | -2.6%    | -2.2%  | -2.8%        | -2.8% | -2.0%                       | -2.3% | -0.1%                      | -0.3% | -1.4%                                         | -1.8% | -0.1%                        | -0.3% | -1.7%                                 | -1.9% | -1.1%     | -1.3% | -2.8%                   | -2.8% | -2.8%                                         |
| Republic of Korea          | -2.1%              | -2.2% | -2.4%              | -2.5% | -3.0%                        | -3.0% | -3.2%   | -3.2% | -1.9%                                         | -1.7% | -3.0%                       | -3.0% | -2.7%                     | -2.7% | -0.5%    | 0.7%   | -3.2%        | -3.2% | -1.8%                       | -1.4% | -0.1%                      | -0.1% | 0.0%                                          | 0.3%  | -0.1%                        | -0.2% | -1.6%                                 | -1.7% | -2.6%     | -2.6% | -2.8%                   | -2.7% | -3.2%                                         |
| San Marino                 | -0.7%              | -0.8% | 0.1%               | 0.1%  | -1.8%                        | -2.2% |         |       | -1.3%                                         | -1.3% | 5.1%                        | 4.9%  | -1.9%                     | -1.7% | -1.5%    | -2.1%  | -2.3%        | -2.3% | -1.1%                       | -1.2% | 0.1%                       | 0.0%  | -0.4%                                         | -0.6% | -0.6%                        | -0.2% | -0.6%                                 | -1.1% | -1.4%     | -2.0% | -1.5%                   | -1.5% | -1.8%                                         |
| Singapore                  | -1.4%              | -1.7% | -2.4%              | -2.4% | -2.4%                        | -2.5% |         |       | 2.3%                                          | -0.4% | -1.2%                       | -1.3% | -2.5%                     | -2.5% | 2.3%     | 1.3%   | -2.8%        | -2.9% | -1.3%                       | -1.1% | 0.1%                       | -0.0% | -1.0%                                         | -2.0% | 0.0%                         | 0.1%  | -1.6%                                 | -1.6% | -1.5%     | -1.8% | -2.9%                   | -2.8% | -2.8%                                         |
| Slovakia                   | -1.6%              | -1.6% | -0.6%              | -0.6% | -2.5%                        | -2.5% |         |       | -0.4%                                         | 0.3%  | 5.4%                        | 4.7%  | -2.1%                     | -1.7% | 7.8%     | 7.4%   | -2.5%        | -2.7% | -1.1%                       | -1.2% | -0.0%                      | -0.0% | -0.4%                                         | -0.4% | -0.2%                        | -0.2% | -0.5%                                 | -1.1% | -0.9%     | -1.2% | -1.9%                   | -2.1% | -2.1%                                         |
| Slovenia                   | -0.9%              | -1.0% | -0.6%              | -0.5% | -2.6%                        | -2.8% |         |       | 0.1%                                          | 0.9%  | 3.8%                        | 3.7%  | -2.3%                     | -2.4% | -1.4%    | -2.3%  | -2.4%        | -2.6% | -1.6%                       | -1.9% | 0.1%                       | 0.1%  | -0.6%                                         | -0.5% | -0.2%                        | -0.2% | -0.7%                                 | -0.7% | -1.0%     | -0.9% | -2.0%                   | -2.0% | -2.4%                                         |
| Sweden                     | -0.6%              | -0.9% | 0.1%               | -0.0% | -2.4%                        | -2.5% |         |       | -1.3%                                         | -1.4% | -0.1%                       | -0.6% | -2.2%                     | -2.3% | -0.9%    | -2.6%  | -2.0%        | -2.3% | -1.2%                       | -0.7% | 0.2%                       | 0.1%  | -0.7%                                         | -1.1% | -0.1%                        | -0.1% | 0.1%                                  | -0.3% | -0.9%     | -0.6% | -2.0%                   | -2.1% | -2.0%                                         |
| Switzerland                | -1.0%              | -1.3% | -0.0%              | -0.3% | -2.7%                        | -2.8% |         |       | -1.7%                                         | -0.9% | -1.6%                       | -1.9% | -2.8%                     | -2.9% | 0.7%     | -0.9%  | -2.3%        | -2.0% | -1.0%                       | -1.0% | 0.1%                       | 0.0%  | -0.3%                                         | -0.6% | -0.0%                        | -0.1% | -0.3%                                 | -0.6% | -1.3%     | -1.6% | -2.2%                   | -2.6% | -2.1%                                         |
| Taiwan (Province of China) | -1.0%              | -1.1% | -0.9%              | -0.9% | -2.2%                        | -2.1% |         |       | 13.6%                                         | 9.0%  | -2.5%                       | -2.5% | -2.1%                     | -2.2% | 10.9%    | 34.3%  | -2.0%        | -2.1% | -1.5%                       | -1.5% | 0.0%                       | -0.0% | -0.2%                                         | 0.2%  | -0.5%                        | -0.6% | 0.1%                                  | 0.3%  | -1.3%     | -1.7% | -2.7%                   | -2.7% | -2.4%                                         |
| United Arab Emirates       | -2.3%              | -2.2% | -1.2%              | -1.2% | -2.9%                        | -2.7% | -3.3%   | -3.3% | -2.4%                                         | -2.2% | -3.1%                       | -3.1% | -2.8%                     | -2.7% | 9.7%     | 9.1%   | -2.6%        | -2.7% | -1.2%                       | -1.5% | -0.1%                      | -0.1% | -2.2%                                         | -2.2% | -0.1%                        | -0.1% | -1.5%                                 | -1.7% | -1.7%     | -1.9% | -2.2%                   | -1.8% | -2.8%                                         |
| United Kingdom             | -0.9%              | -1.2% | 0.1%               | 0.0%  | -2.0%                        | -2.2% |         |       | -1.8%                                         | -2.1% | -1.7%                       | -1.5% | -2.3%                     | -2.3% | 0.7%     | -2.3%  | -2.0%        | -2.2% | -0.9%                       | -0.8% | 0.1%                       | 0.0%  | -0.1%                                         | -0.2% | -0.2%                        | -0.3% | -0.6%                                 | -0.7% | 0.2%      | 0.4%  | -2.4%                   | -2.3% | -1.8%                                         |
| United States of America   | -0.9%              | -1.1% | 0.1%               | -0.5% | -1.9%                        | -1.9% |         |       | -1.1%                                         | -1.2% | -0.9%                       | -1.1% | -2.2%                     | -2.3% | -2.8%    | -2.9%  | -2.4%        | -2.3% | 0.2%                        | 0.2%  | 0.0%                       | 0.0%  | -0.7%                                         | -1.4% | -0.2%                        | -0.2% | -0.7%                                 | -0.7% | -0.6%     | -0.6% | -2.0%                   | -1.9% | -1.7%                                         |

S16: Relationship between enteric and lower respiratory tract disease burden for 0-24 year olds by country, 2019.

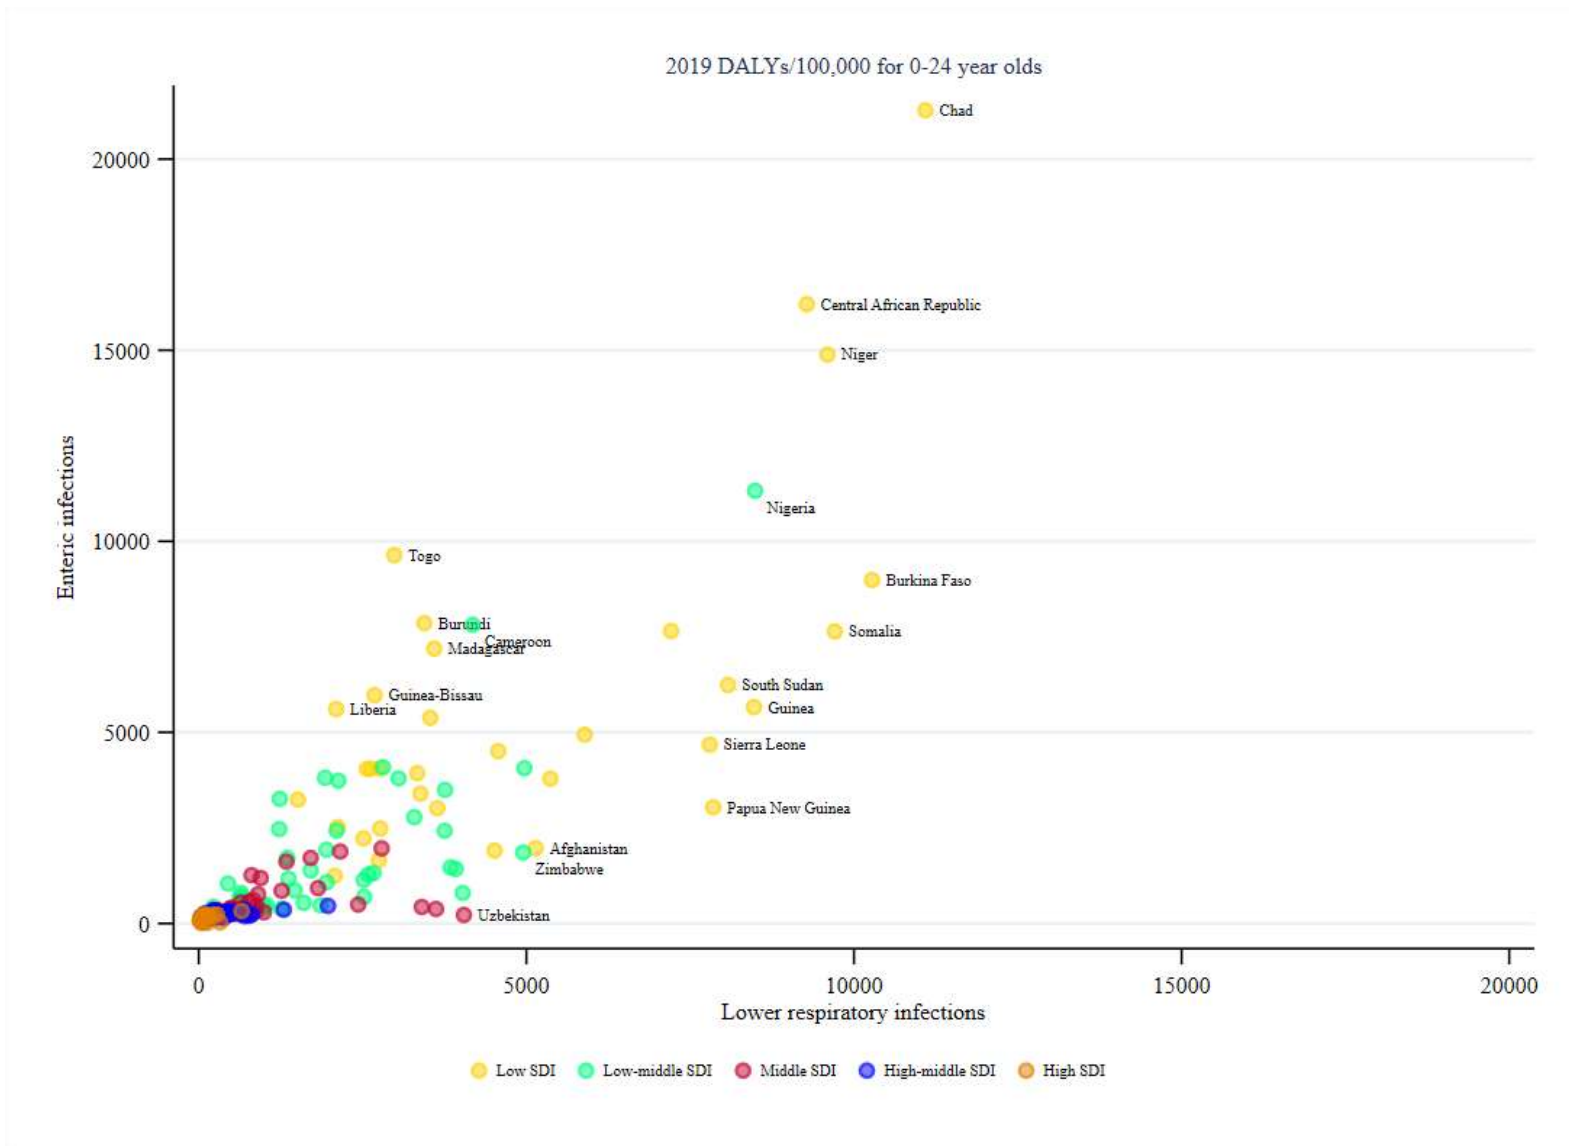

S17\_1 Part A: Enteric Infections Incidence, YLD, death and DALY per 100 000 in 2019 for each age group

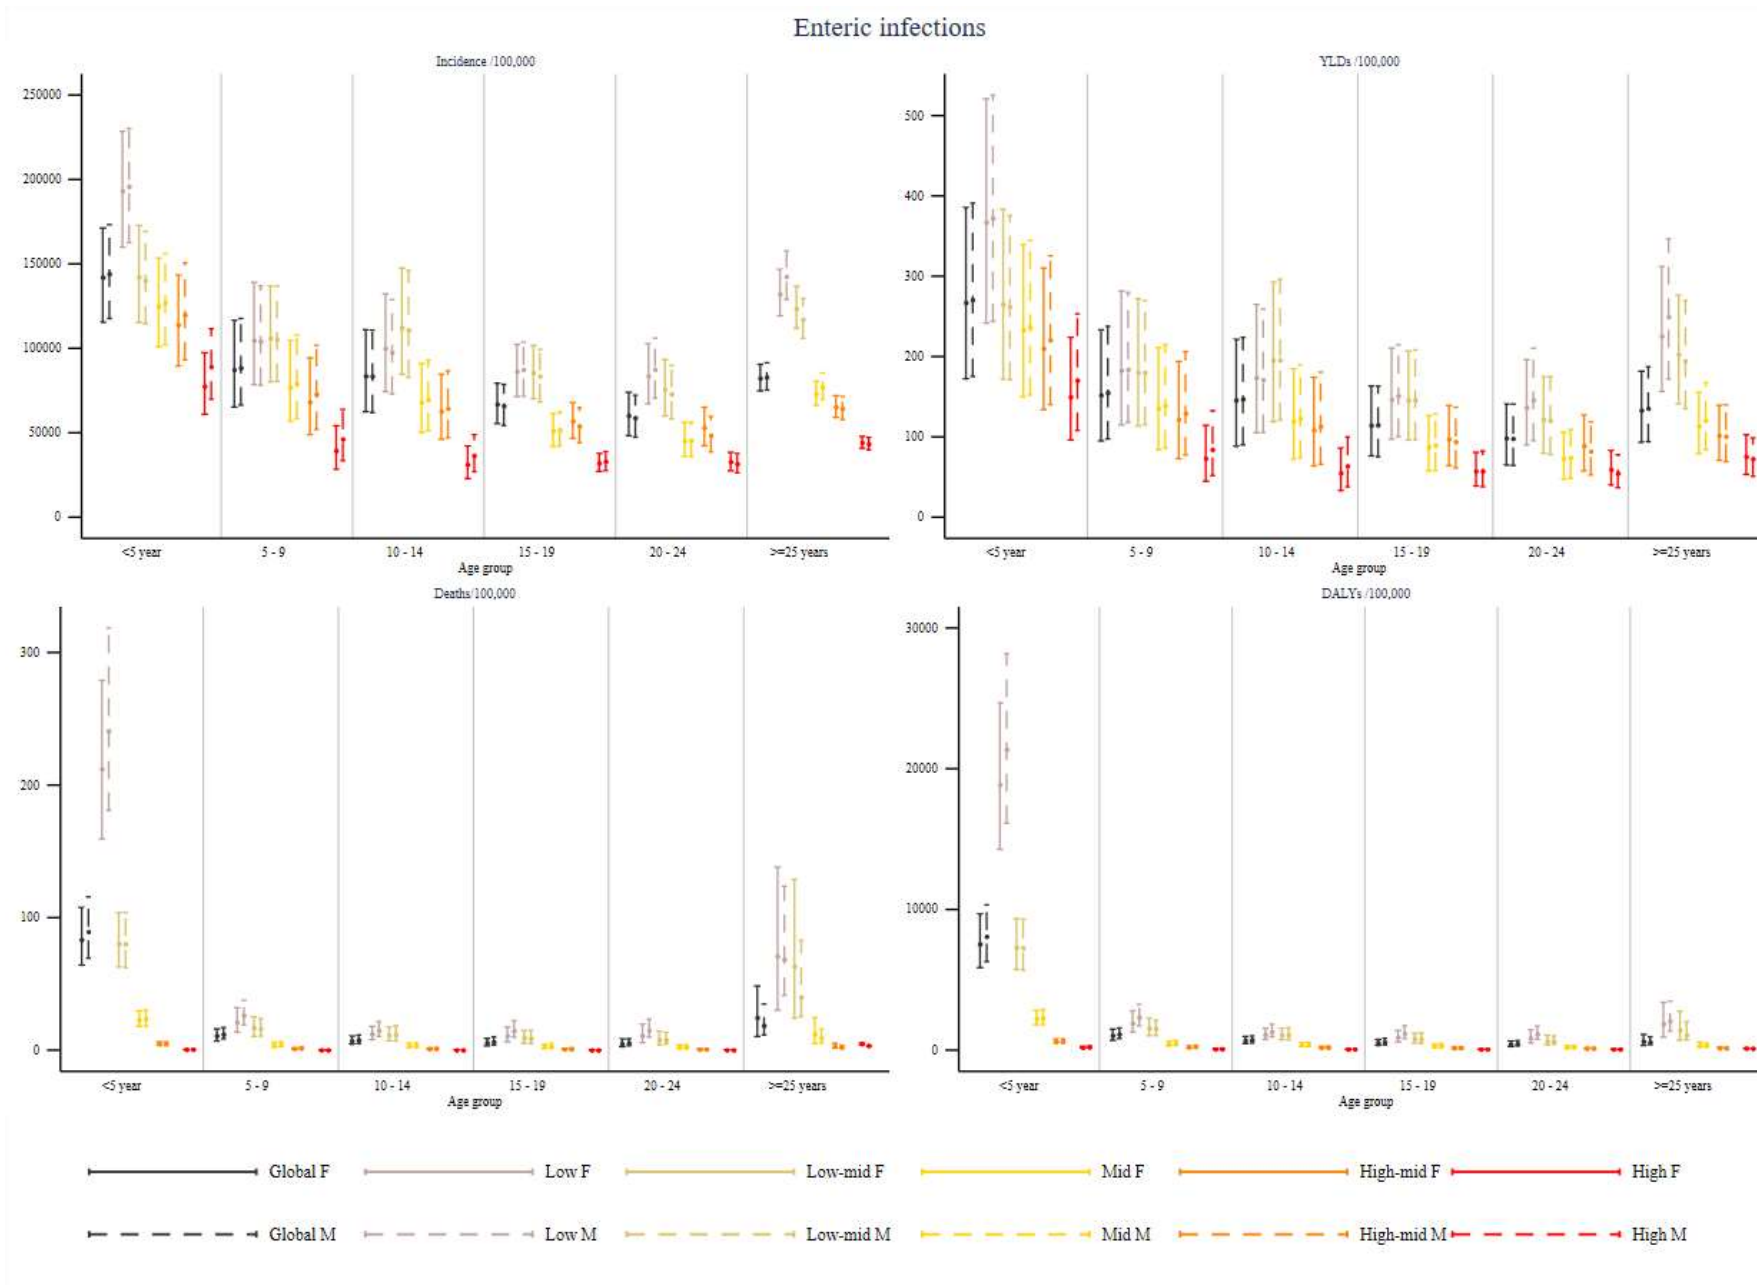

S17\_1 Part B: Contribution of individual causes for death/100,000 and DALYs/ 100,00 for Enteric Infections in 2019

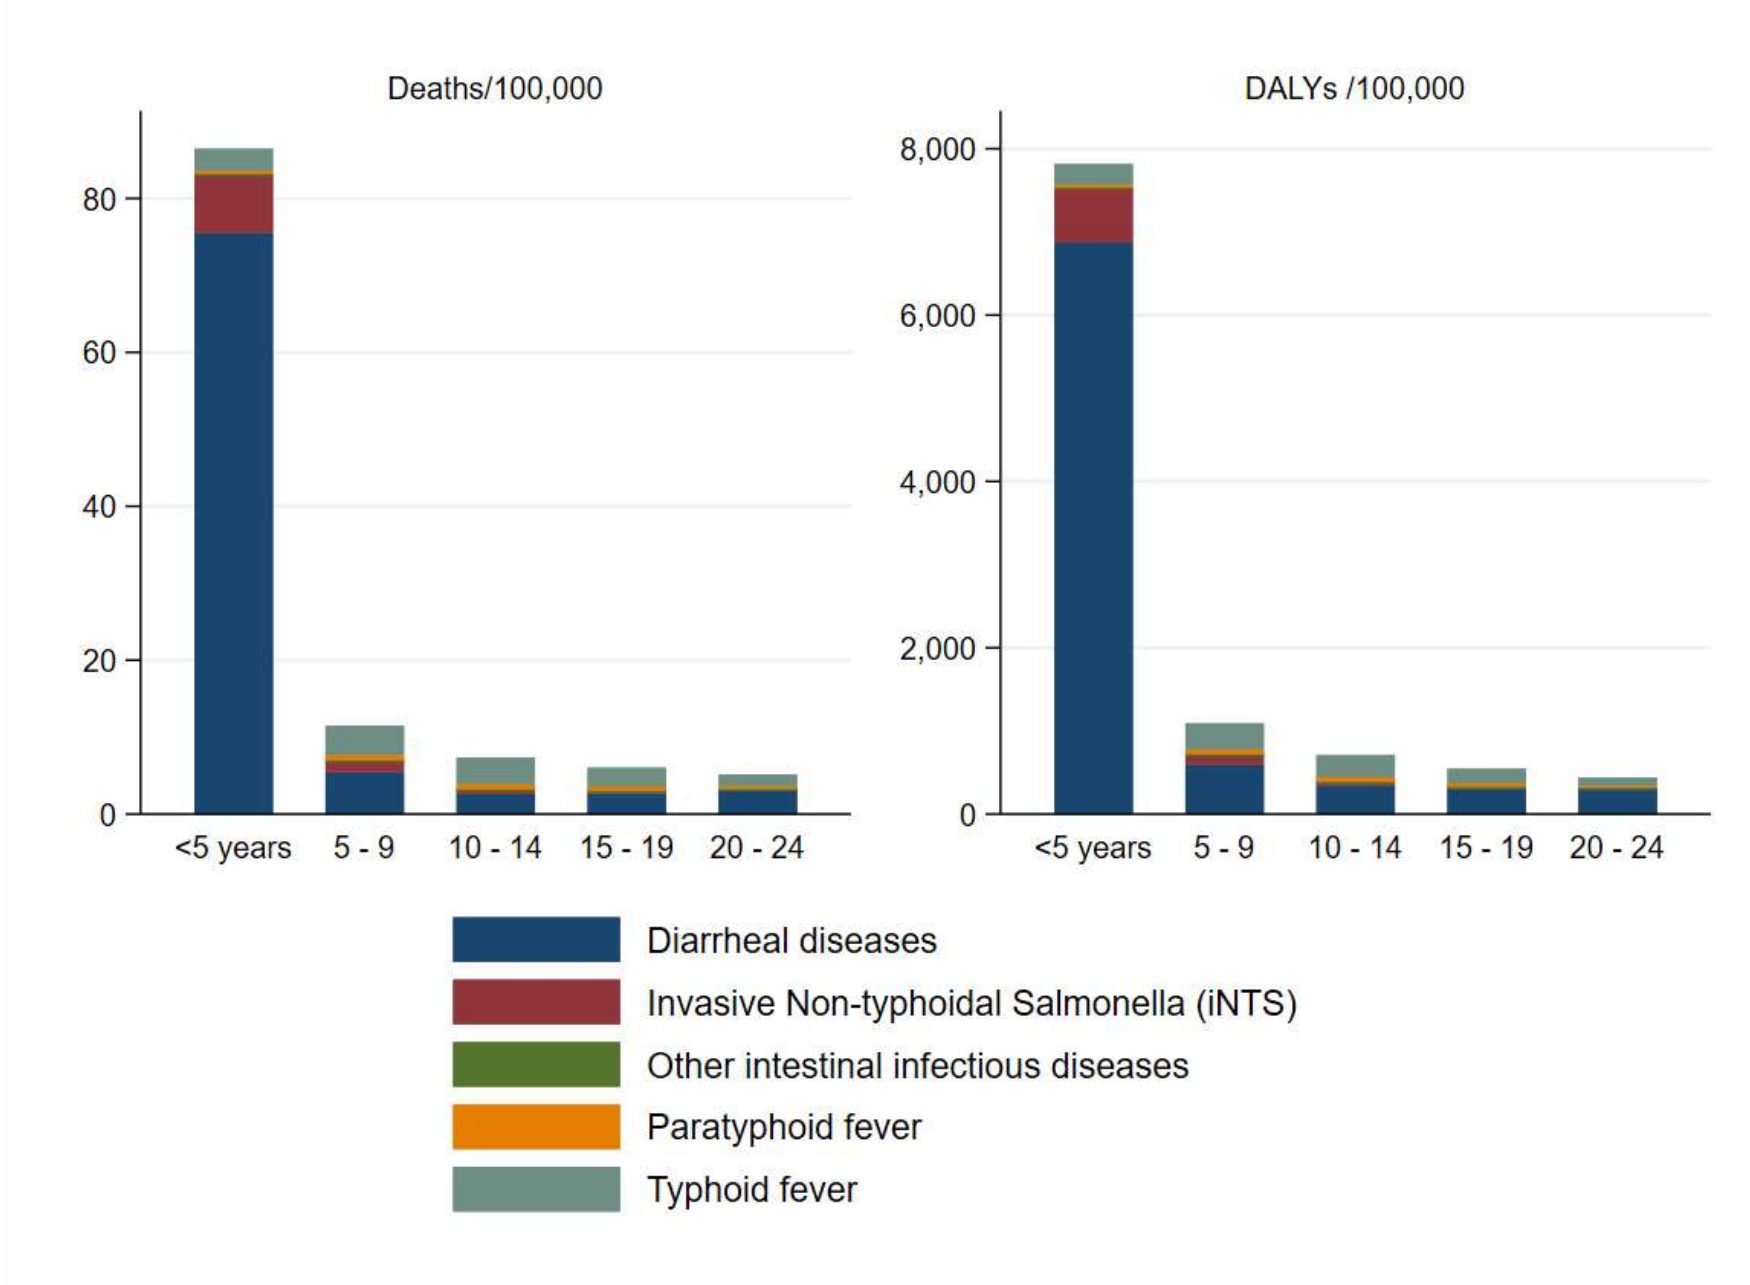

S17\_2 Part A: Hepatitis Incidence, YLD, death and DALY per 100 000 in 2019

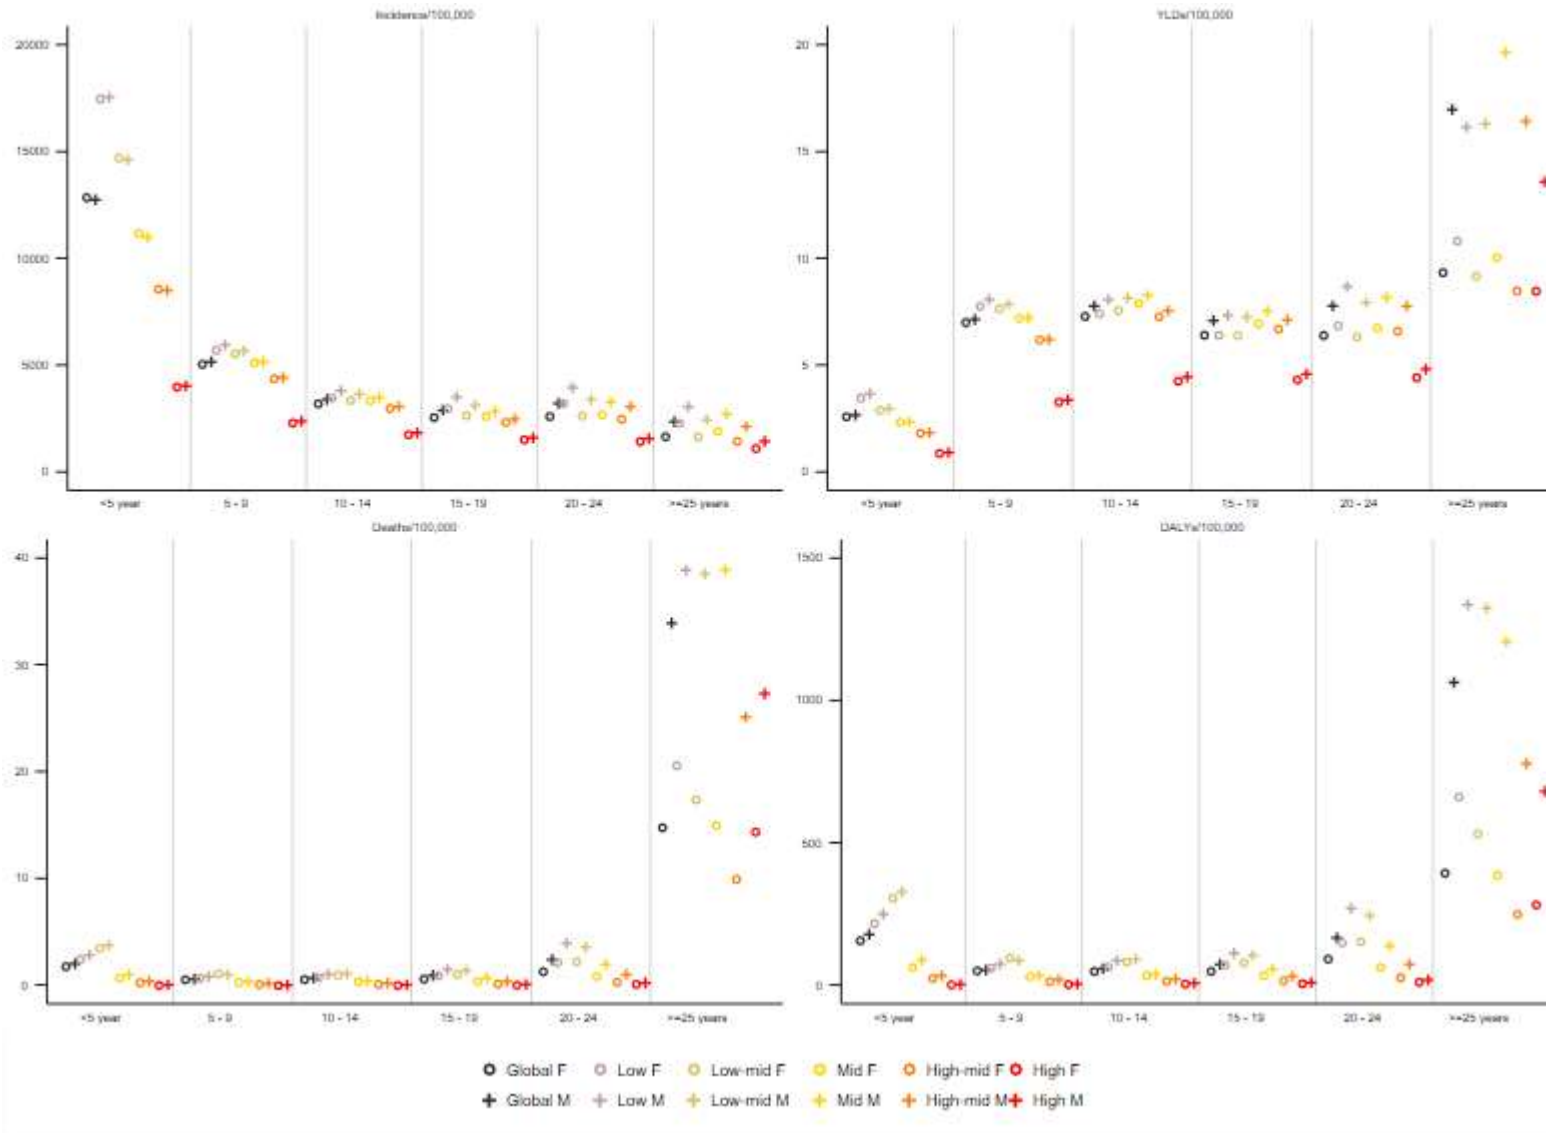



S17\_2 Part B: Contribution of individual causes for death/100,000 and DALYs/ 100,00 for Hepatitis in 2019

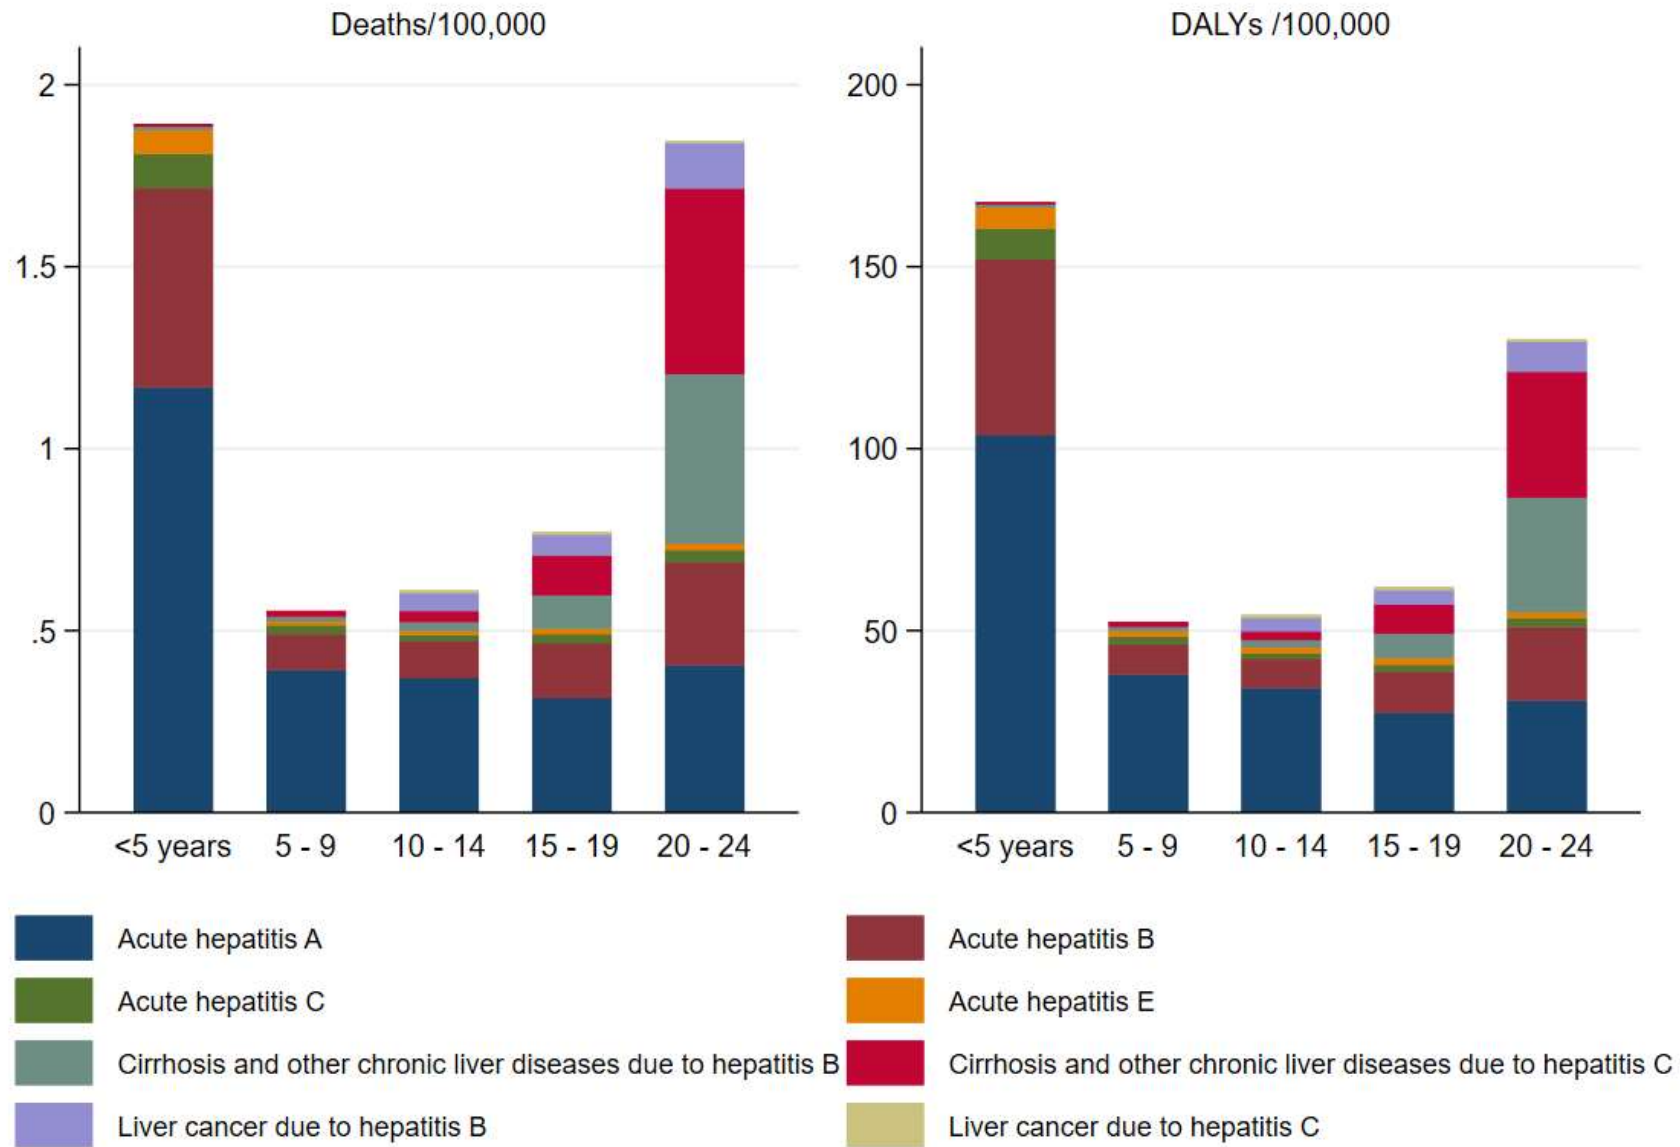

S17\_3 Part A: HIV/AIDS Incidence, YLD, death and DALY per 100 000 in 2019 for each age group

HIV/AIDS

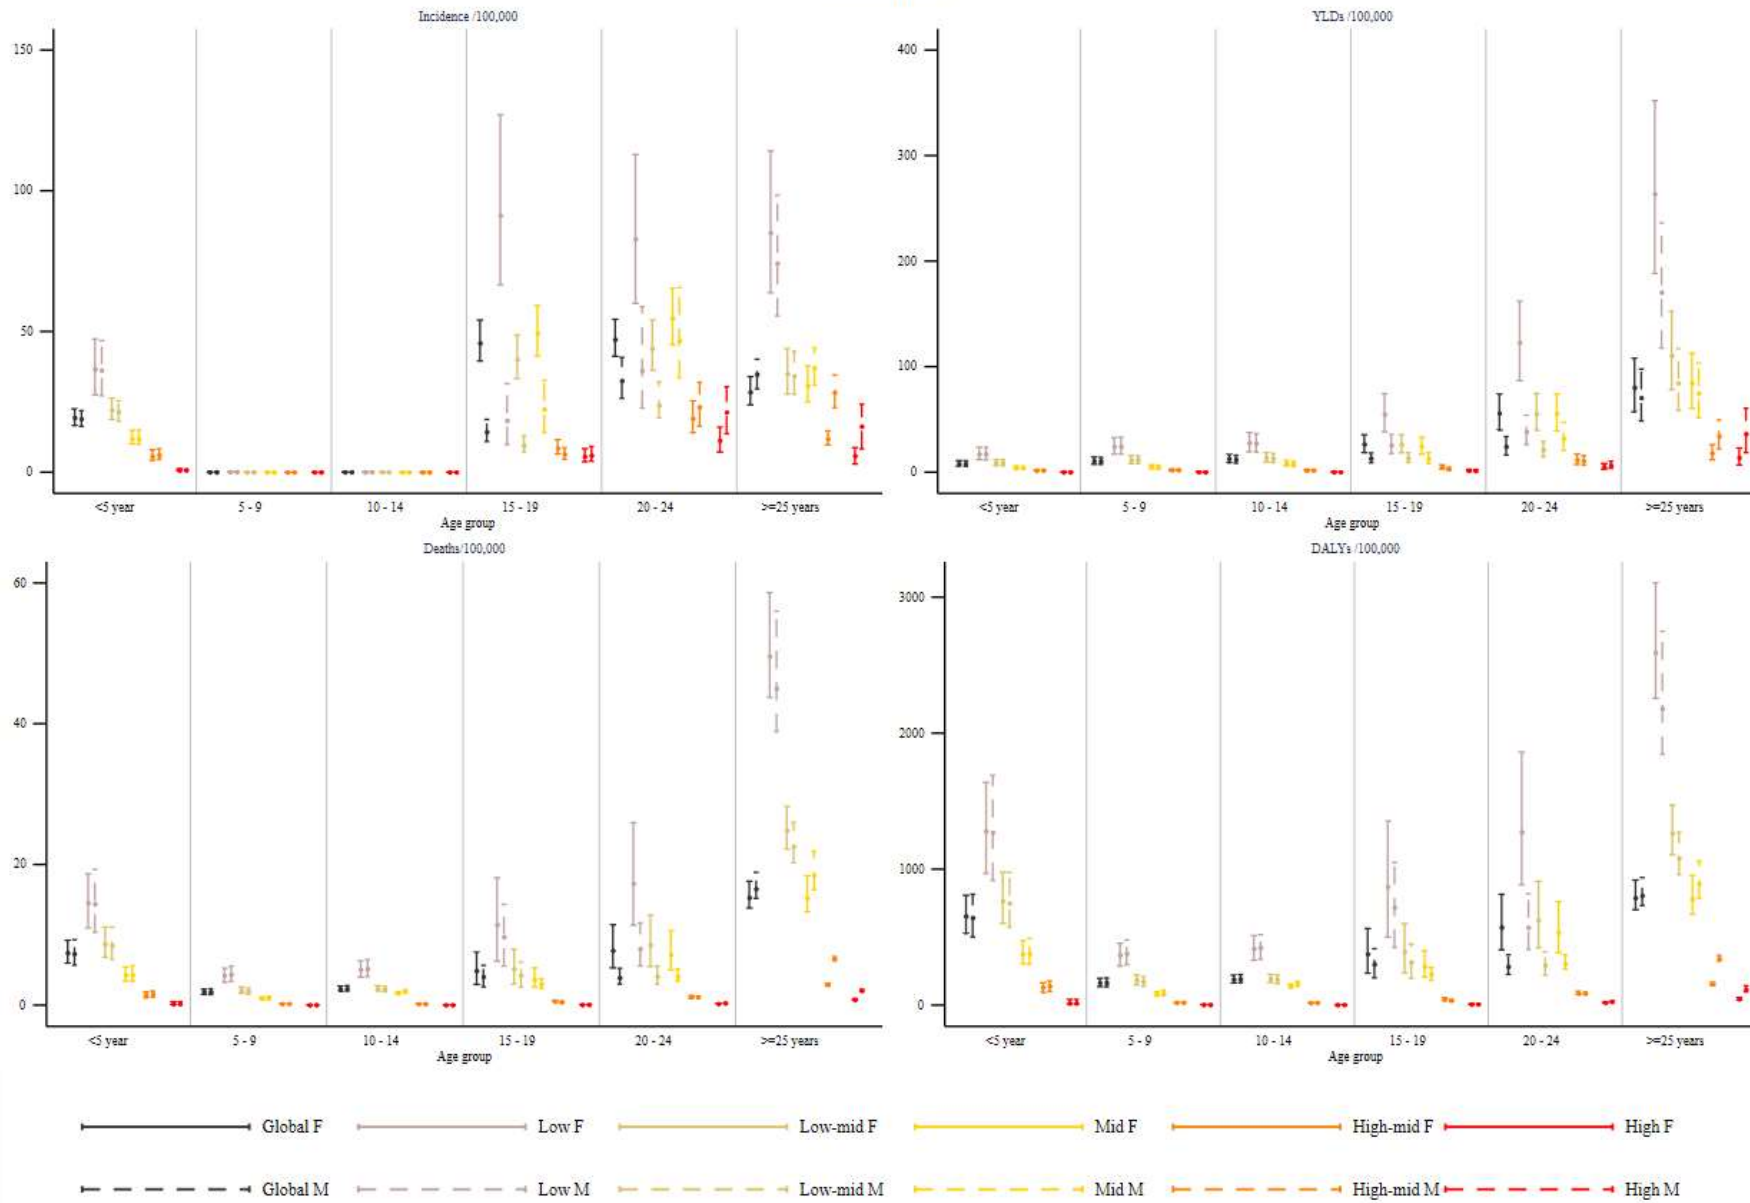

S17\_3 Part B: Contribution of individual causes for death/100,000 and DALYs/ 100,00 for HIV/AIDS in 2019

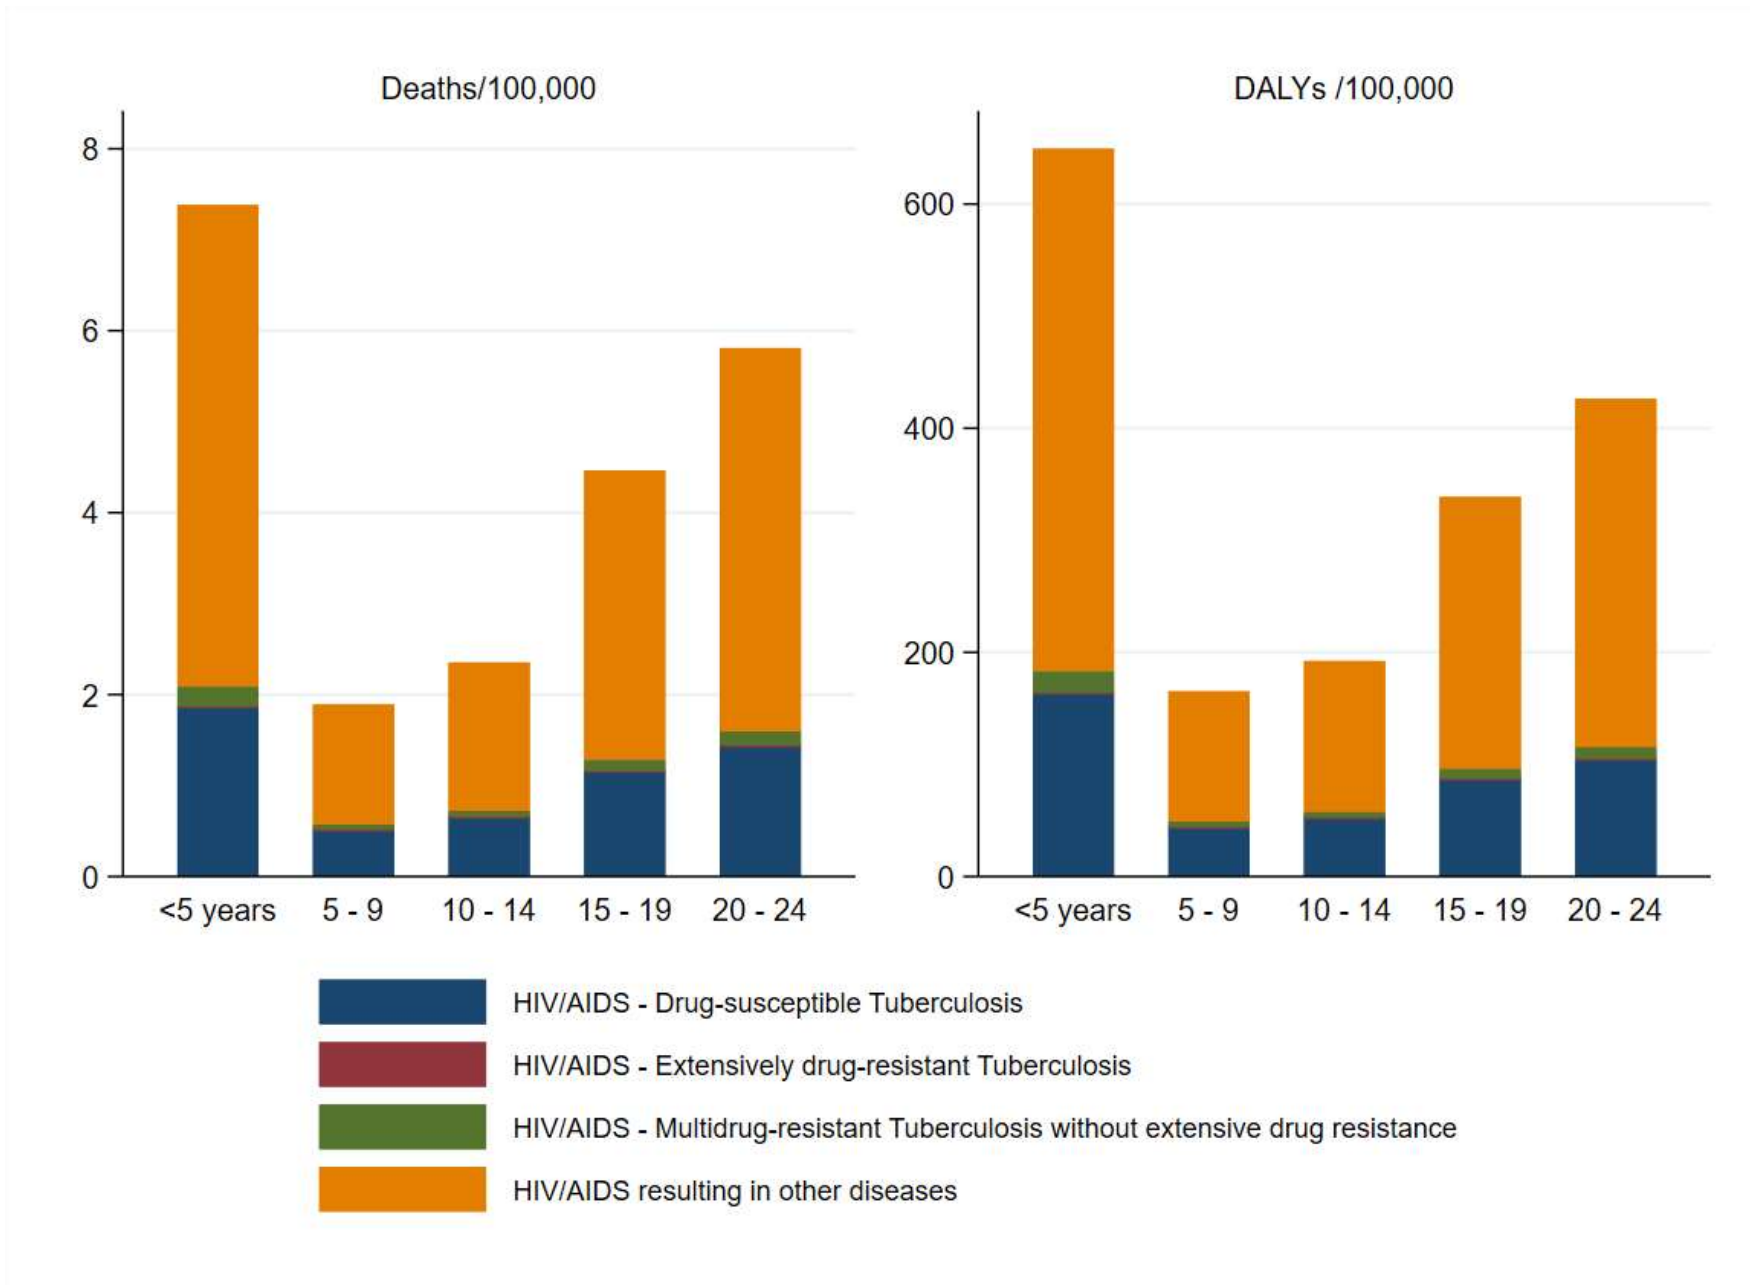

S17\_4 Part A: Infectious skin conditions Incidence, YLD, death and DALY per 100 000 in 2019 for each age group

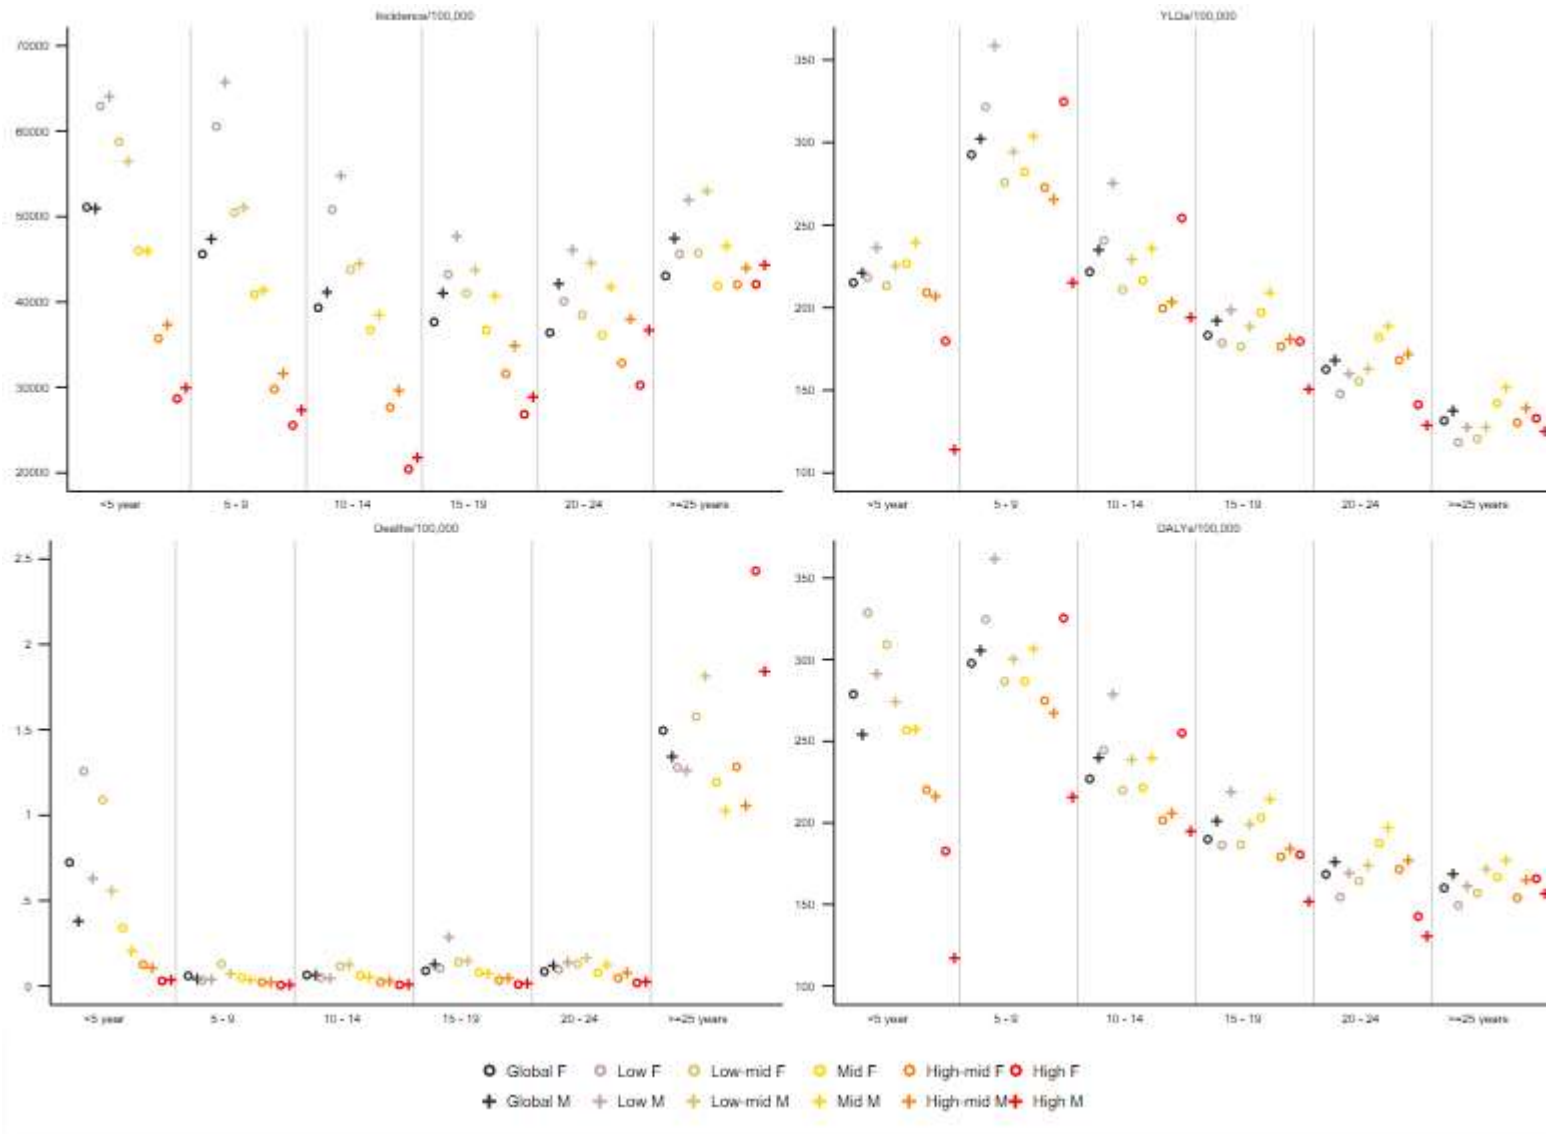

S17\_4 Part B: Contribution of individual causes for death/100,000 and DALYs/ 100,00 for Infectious skin conditions in 2019

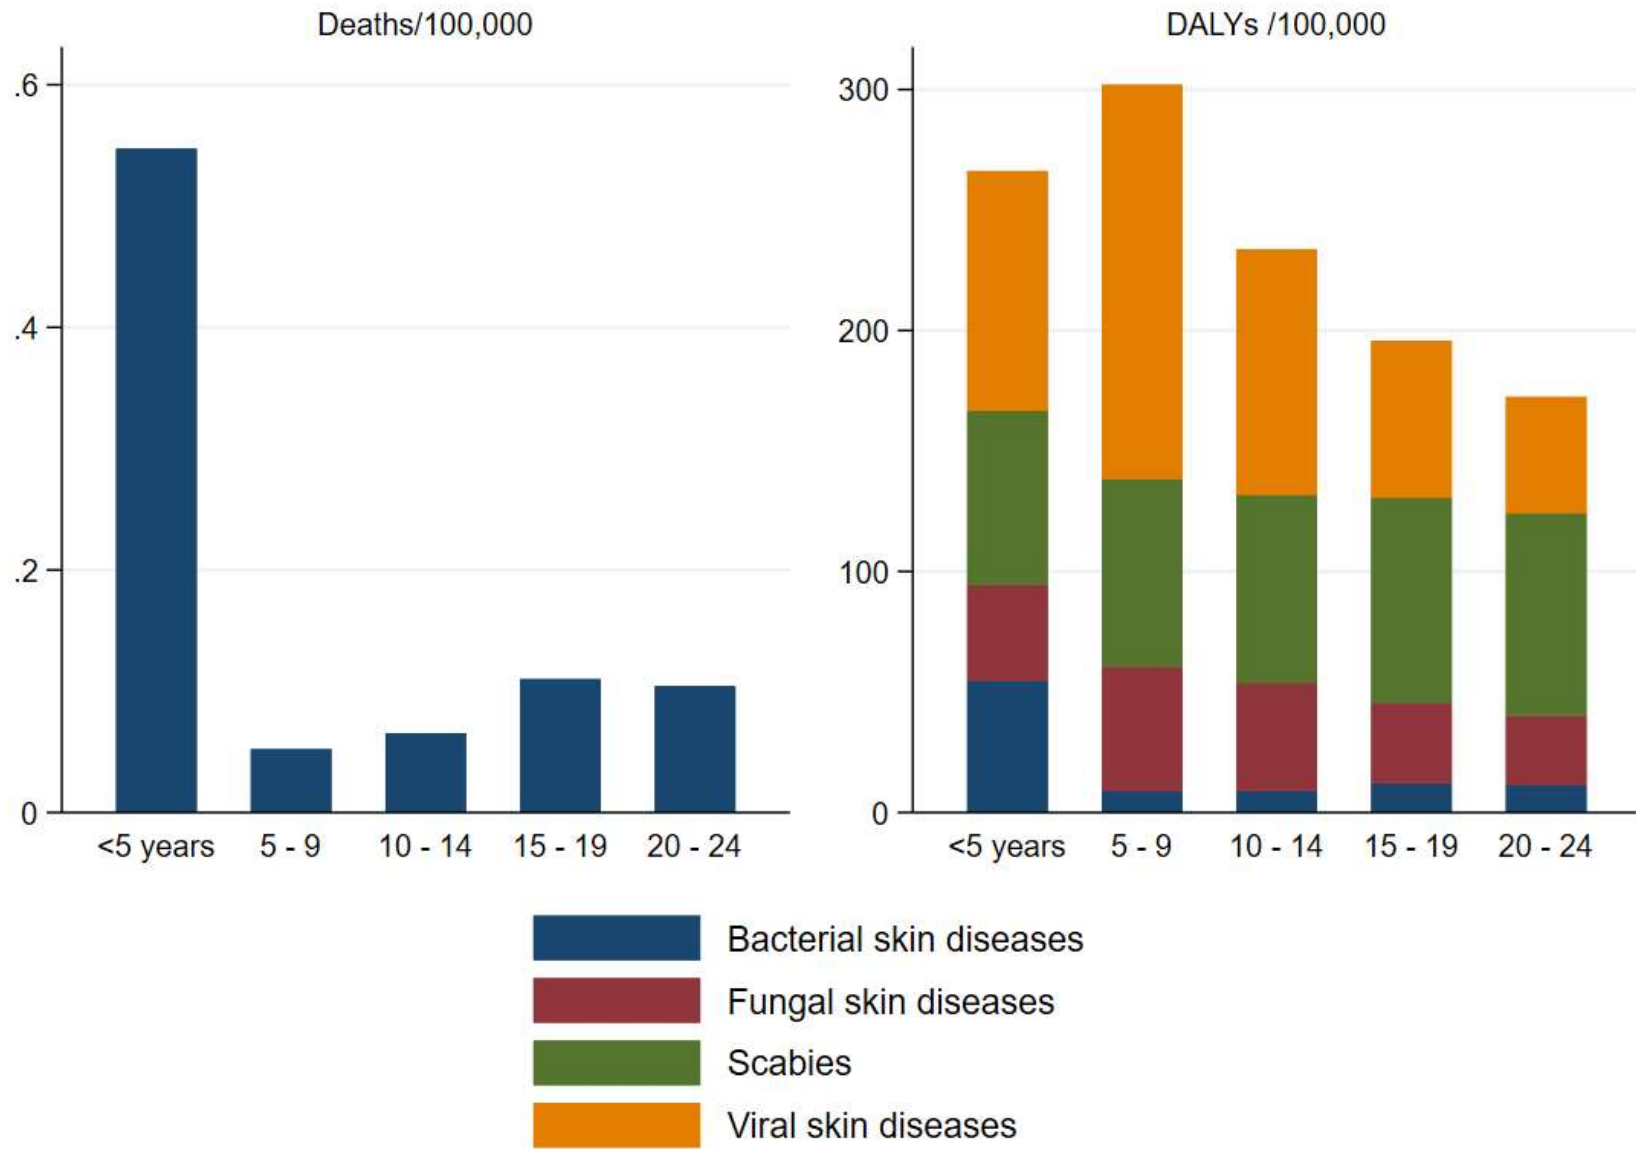

S17\_5 Part A: Lower respiratory infections Incidence, YLD, death and DALY per 100 000 in 2019 for each age group

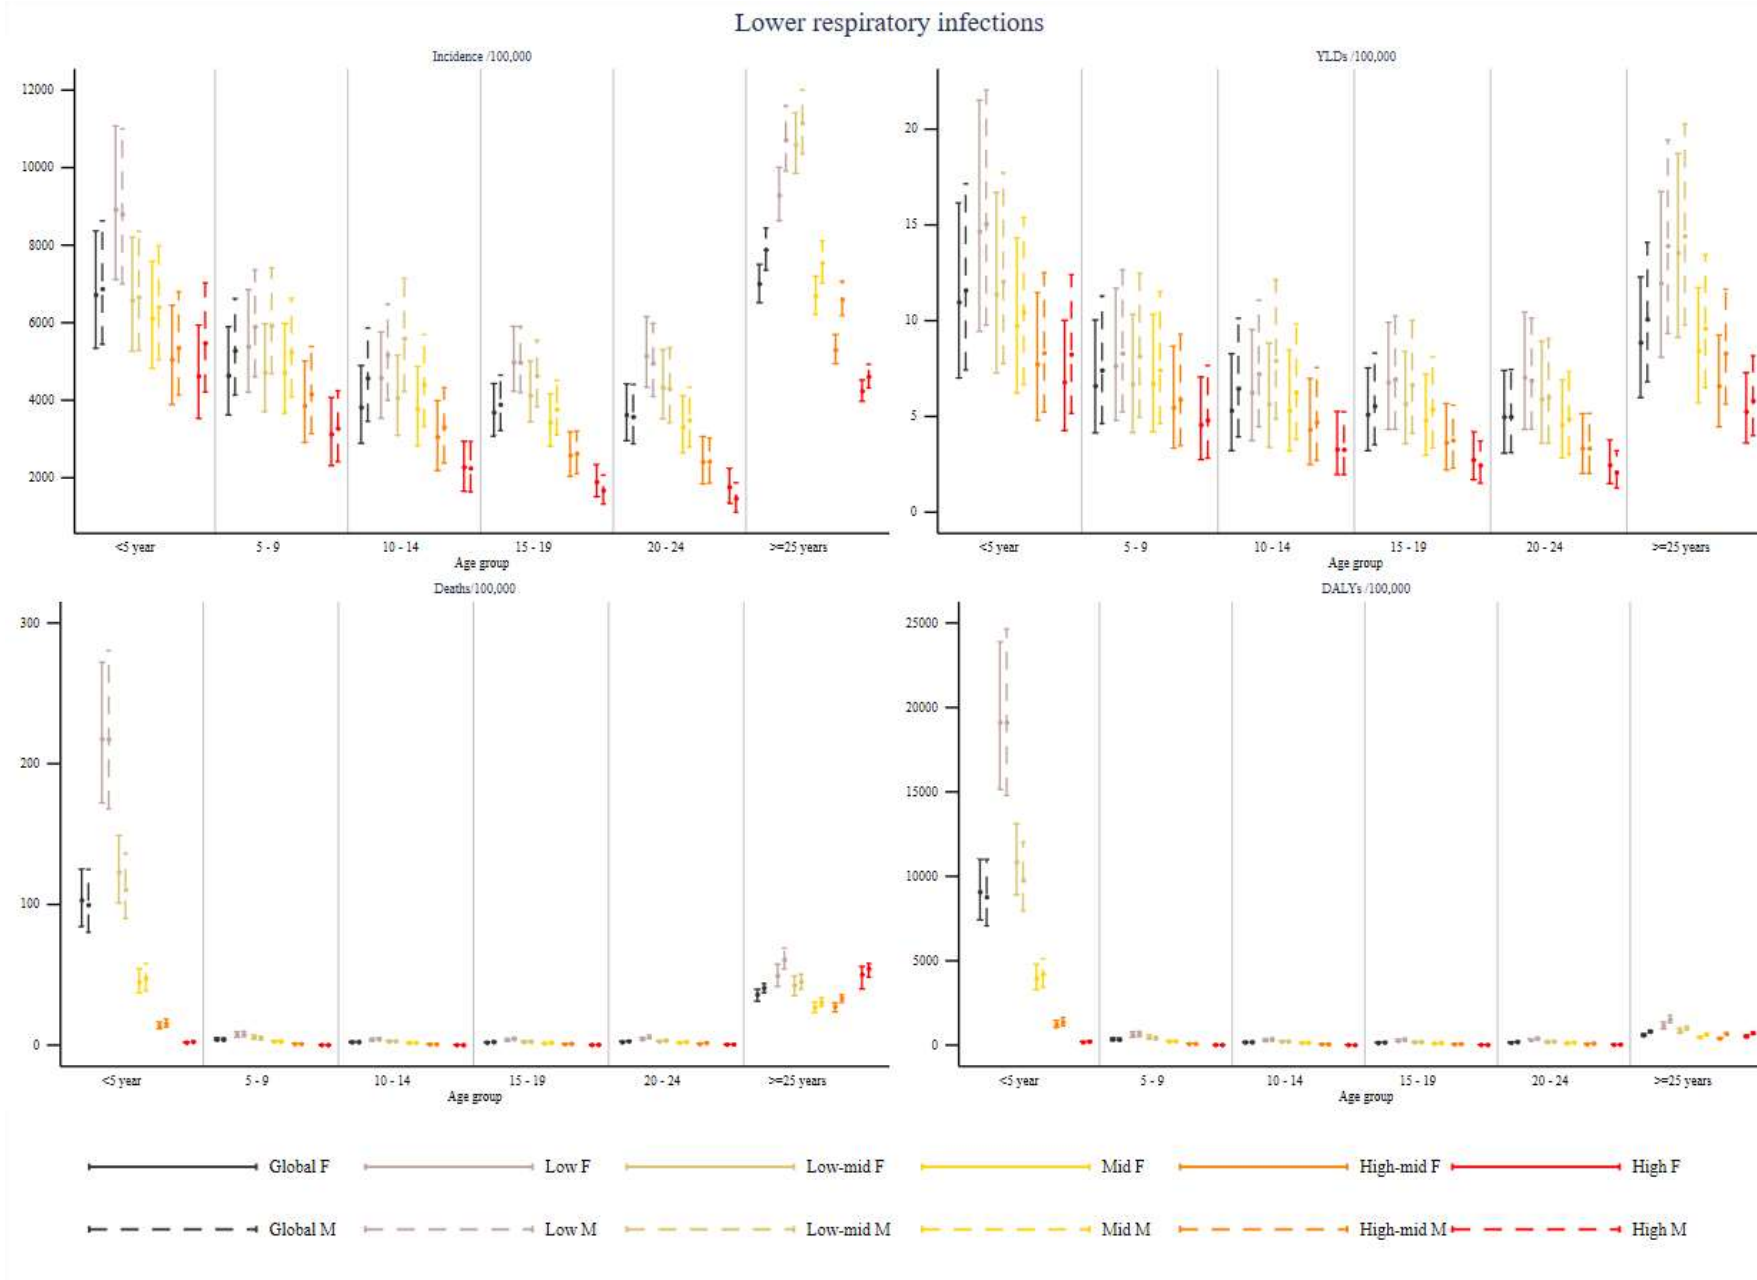

S17\_6 Part A: Malaria Incidence, YLD, death and DALY per 100 000 in 2019 for each age group

Malaria

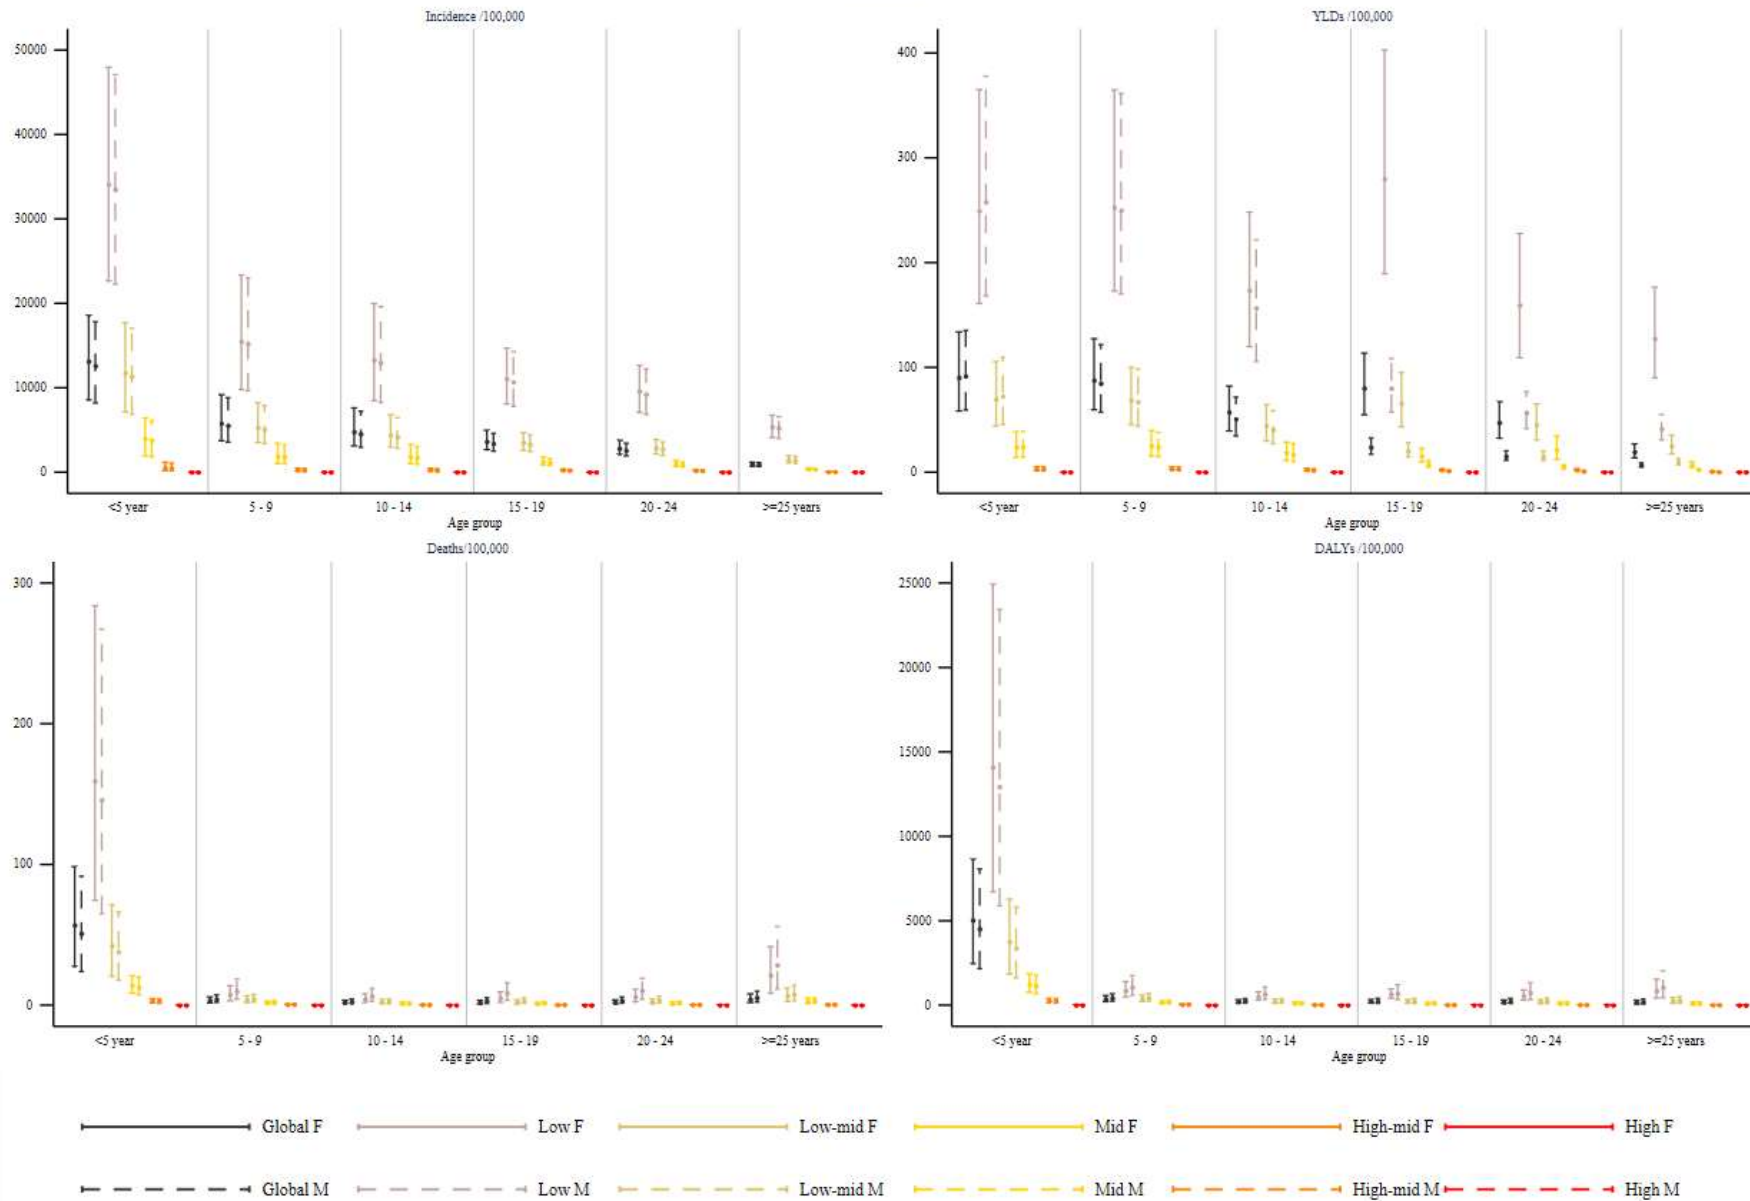

S17\_7 Part A: Maternal sepsis and other maternal infections Incidence, YLD, death and DALY per 100 000 in 2019 for each age group

Maternal sepsis and other maternal infections

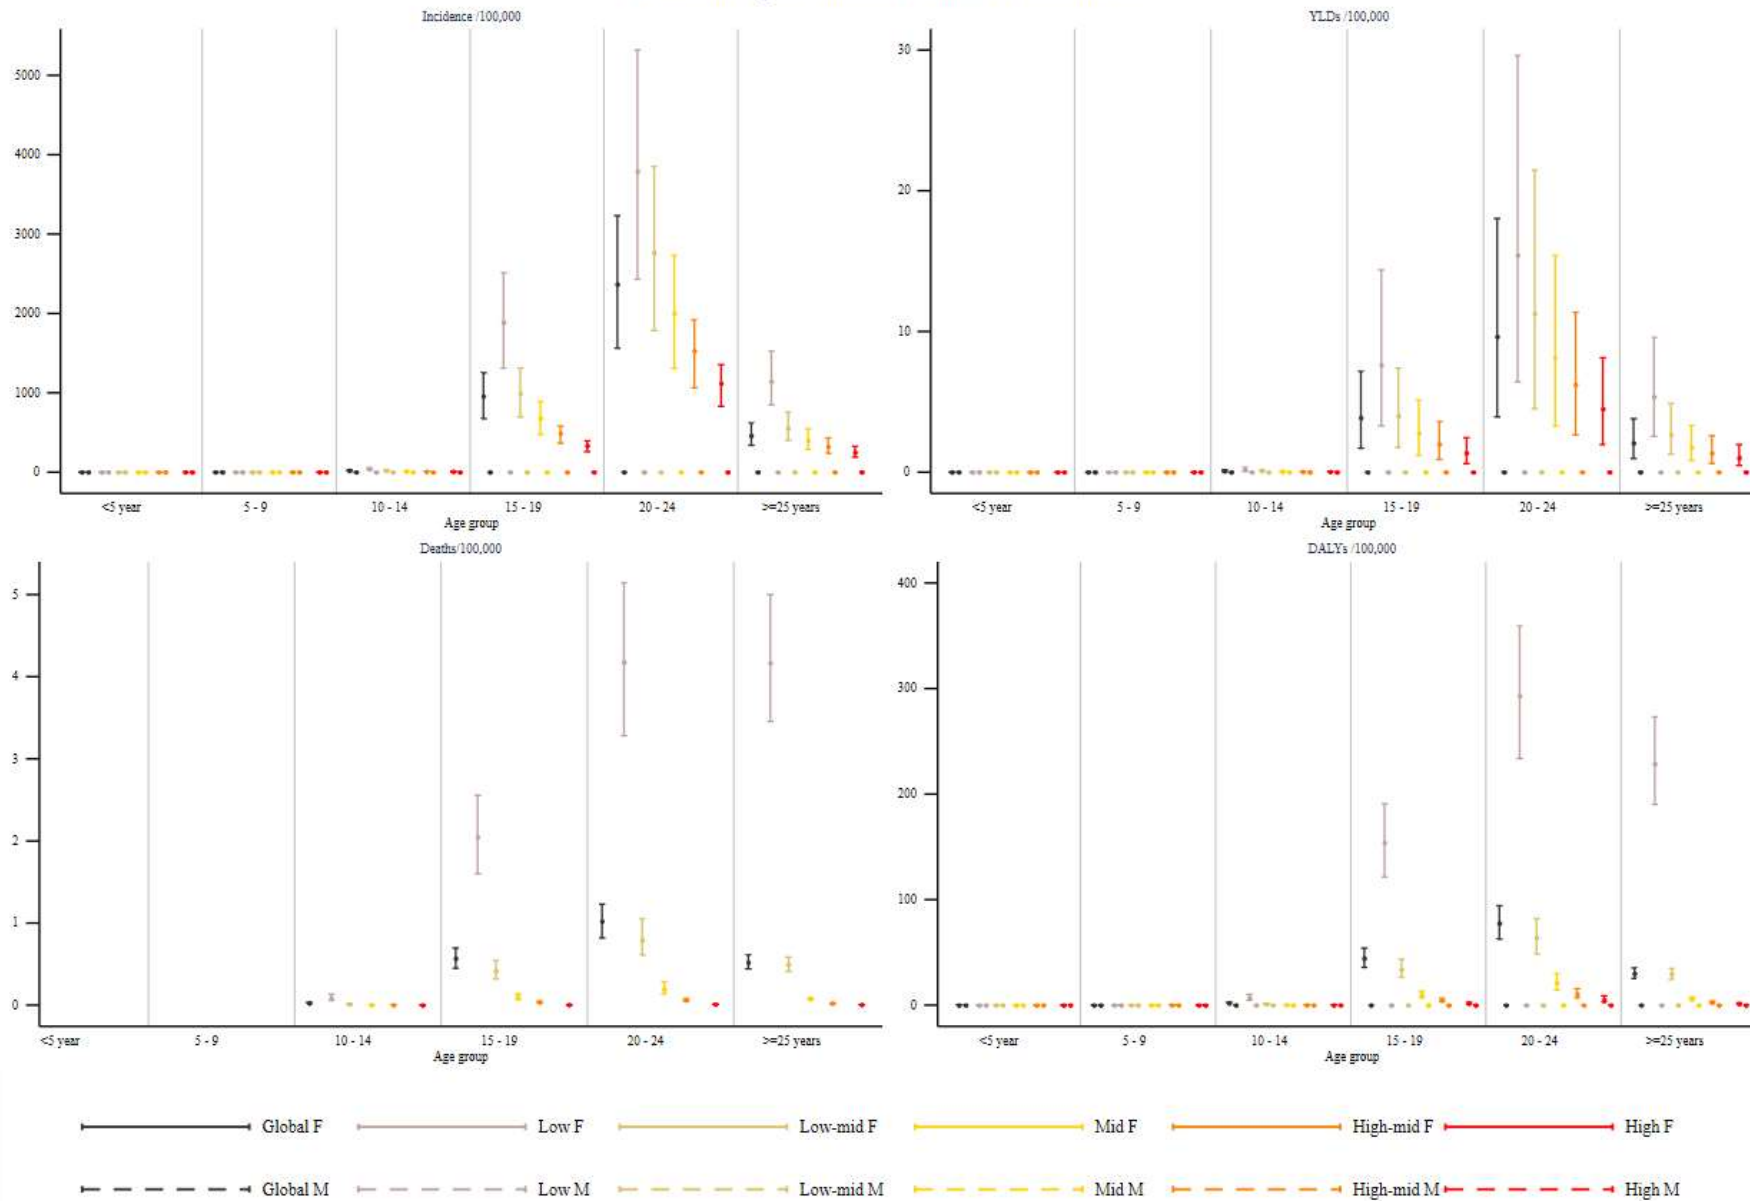



S17\_8 Part A: Meningitis & Encephalitis Incidence, YLD, death and DALY per 100 000 in 2019 for each age group

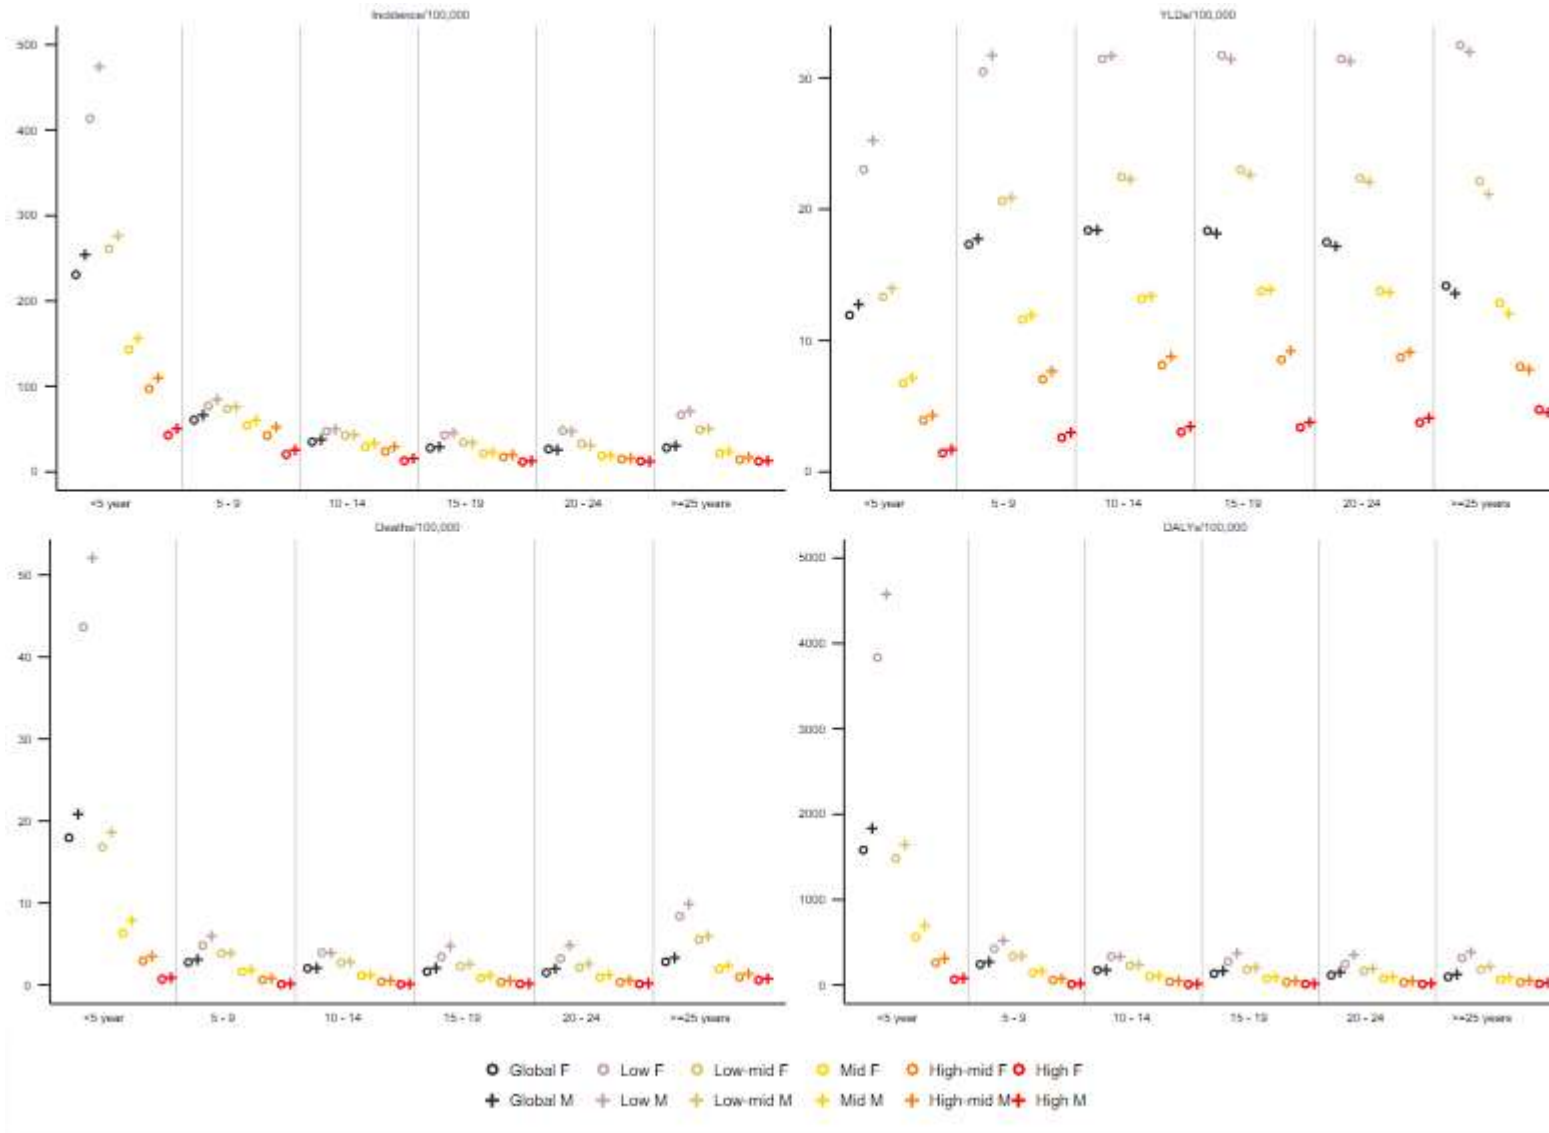

S17\_8 Part B: Contribution of individual causes for death/100,000 and DALYs/ 100,00 for Meningitis & Encephalitis in 2019

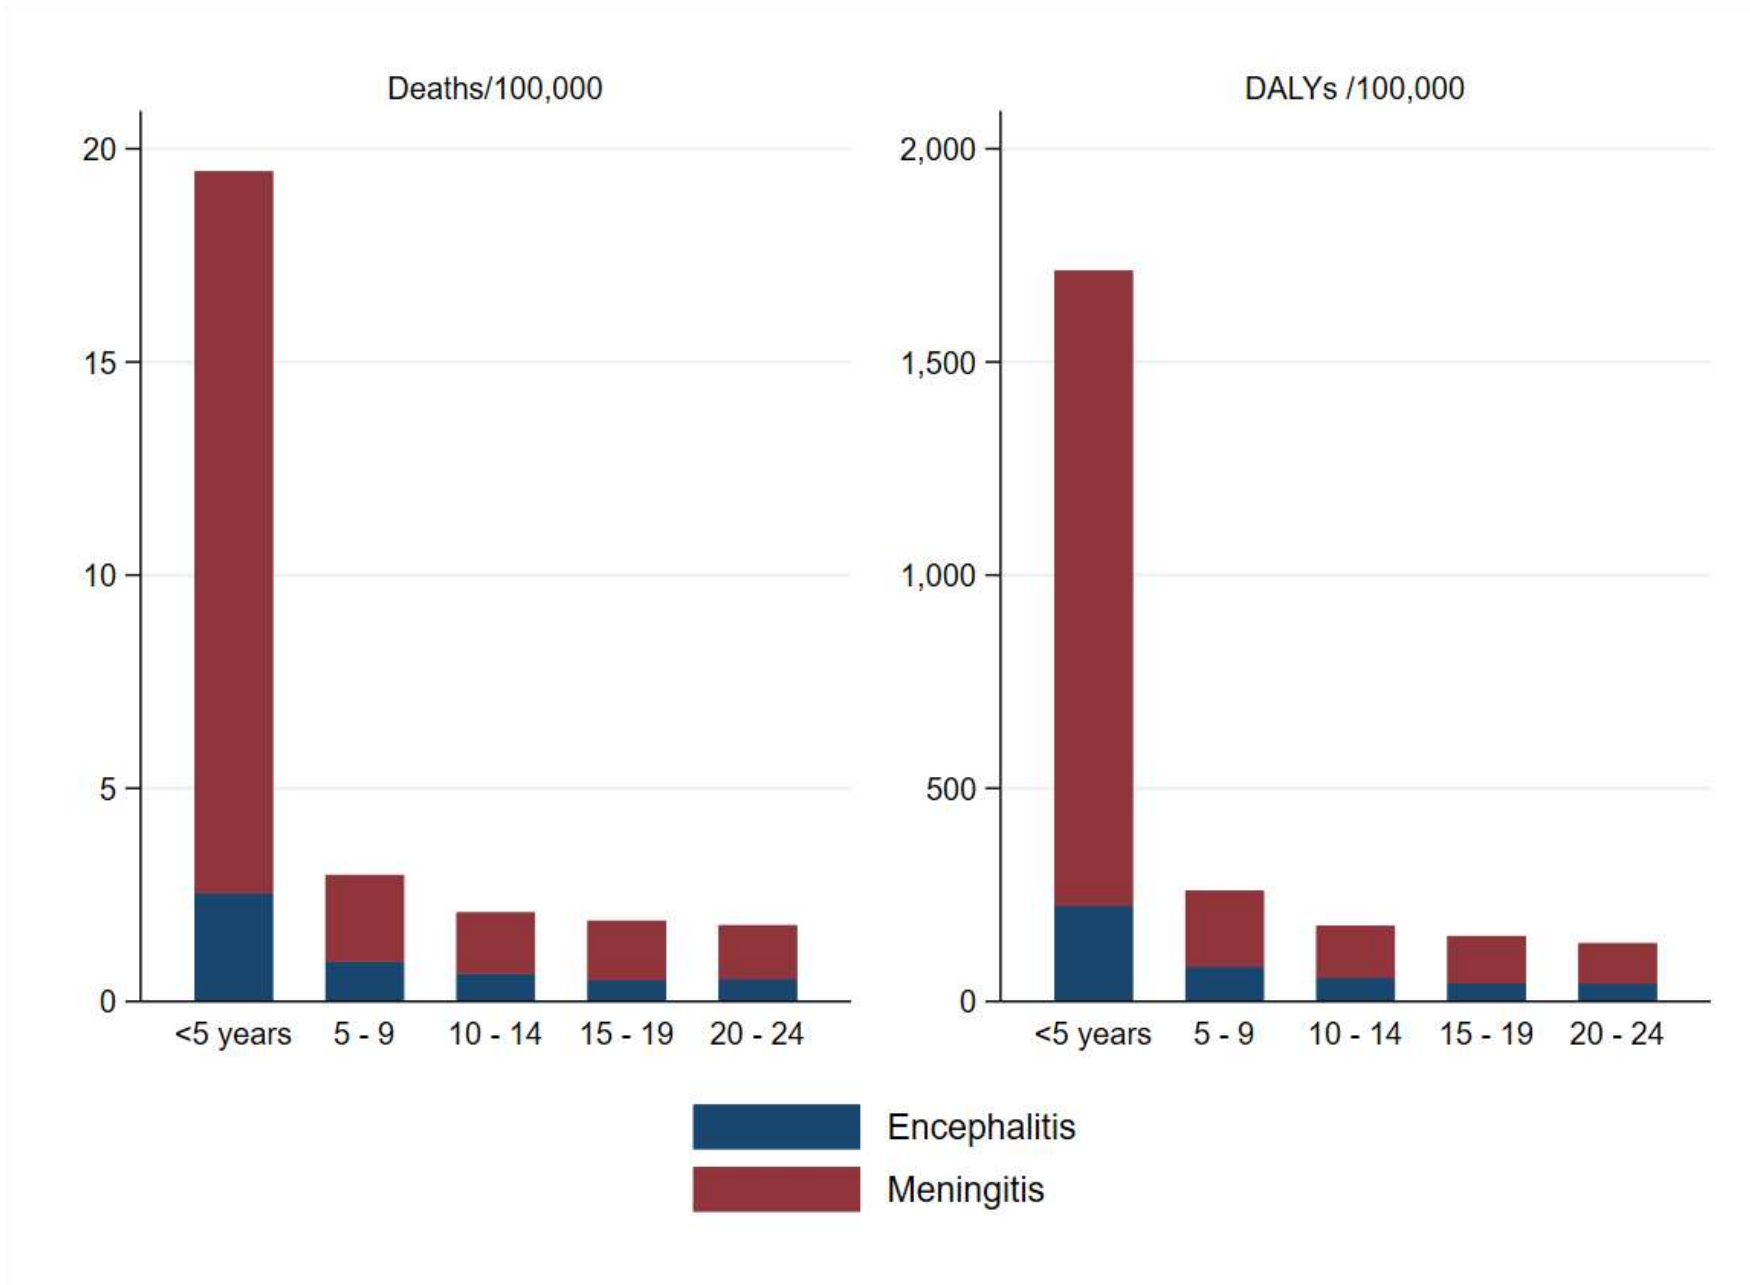

S17\_9 Part A: Neglected Tropical Diseases Incidence, YLD, death and DALY per 100 000 in 2019 for each age group

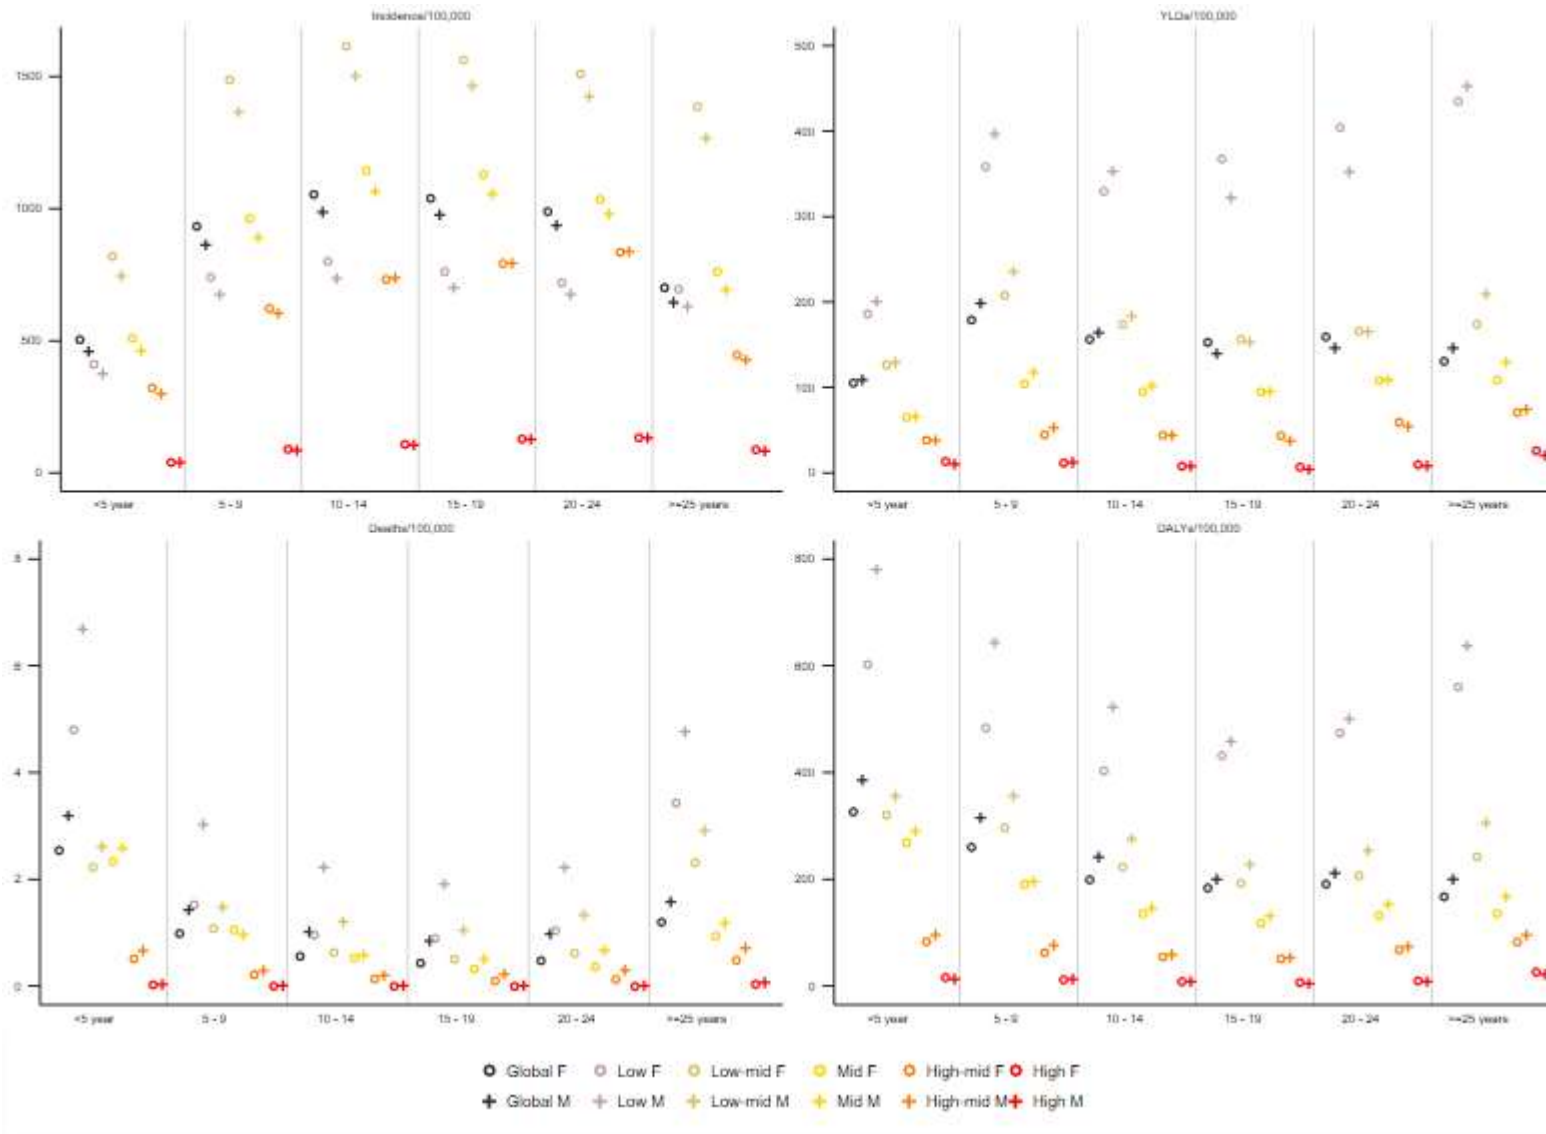

S17\_9 Part B: Contribution of individual causes for death/100,000 and DALYs/ 100,00 for Neglected Tropical Diseases in 2019

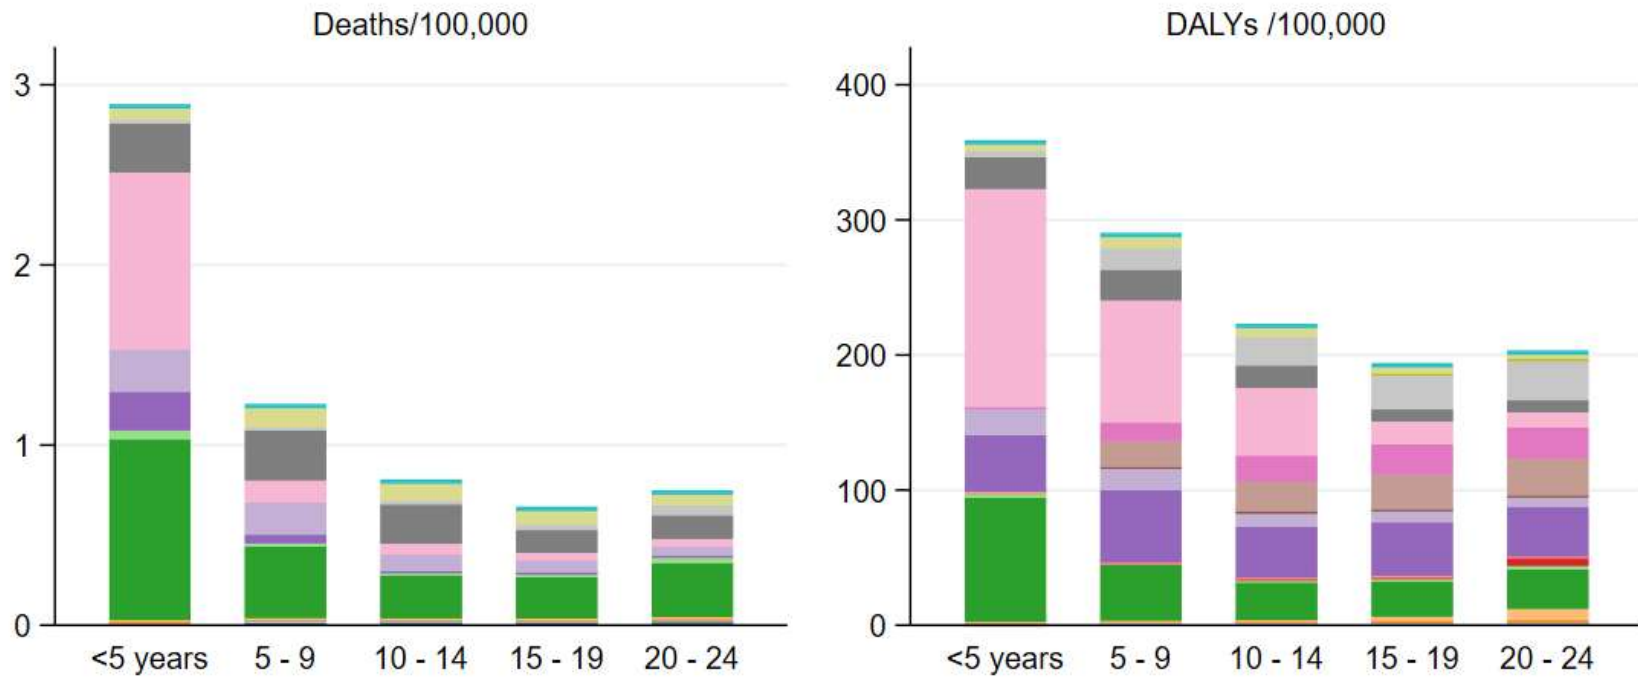

- African trypanosomiasis
- Chagas disease
- Cysticercosis
- Dengue
- Ebola
- Food-borne trematodiases
- Guinea worm disease
- Intestinal nematode infections
- Leishmaniasis
- Leprosy
- Lymphatic filariasis
- Onchocerciasis
- Other neglected tropical diseases
- Rabies
- Schistosomiasis
- Trachoma
- Yellow fever
- Zika virus

S17\_10 Part A: Neonatal sepsis and other neonatal infections Incidence, YLD, death and DALY per 100 000 in 2019 for each age group

Neonatal sepsis and other neonatal infections

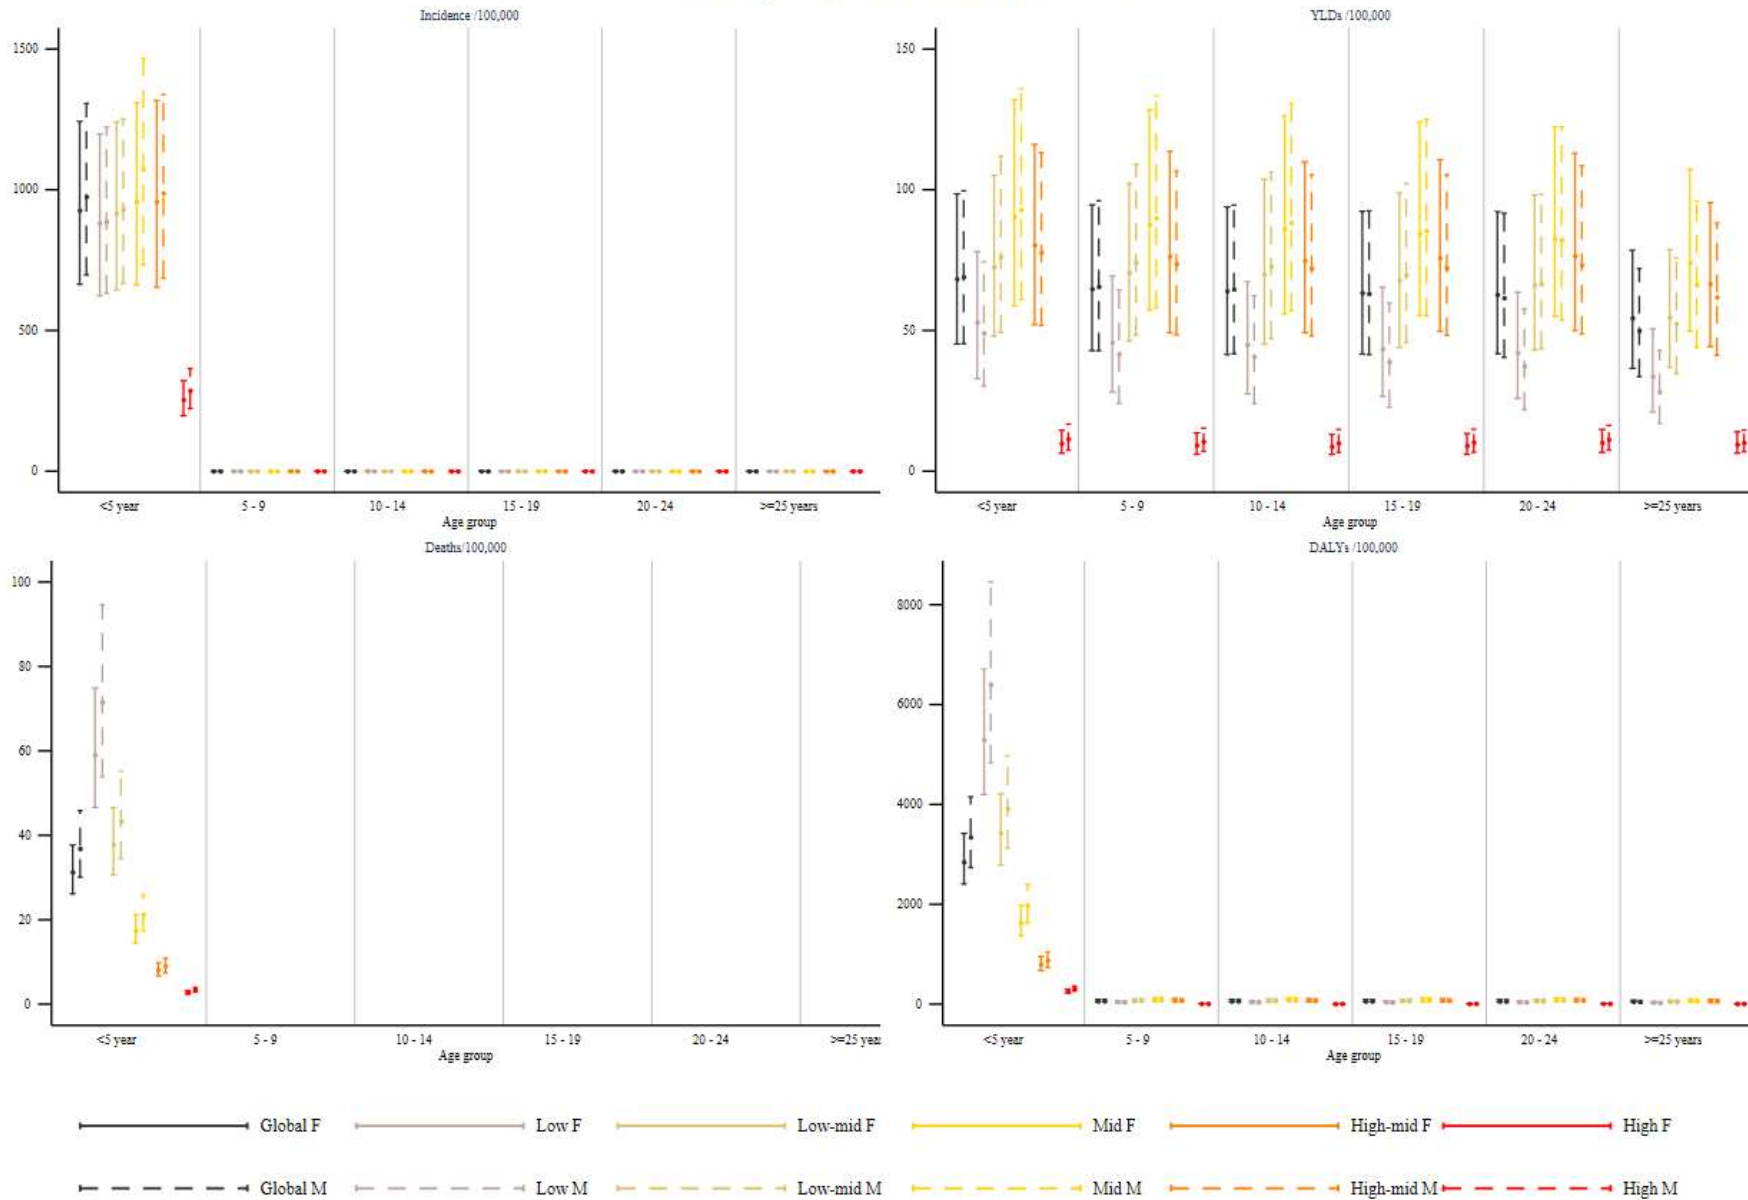

S17\_11 Part A: Other unspecified infectious diseases Incidence, YLD, death and DALY per 100 000 in 2019 for each age group

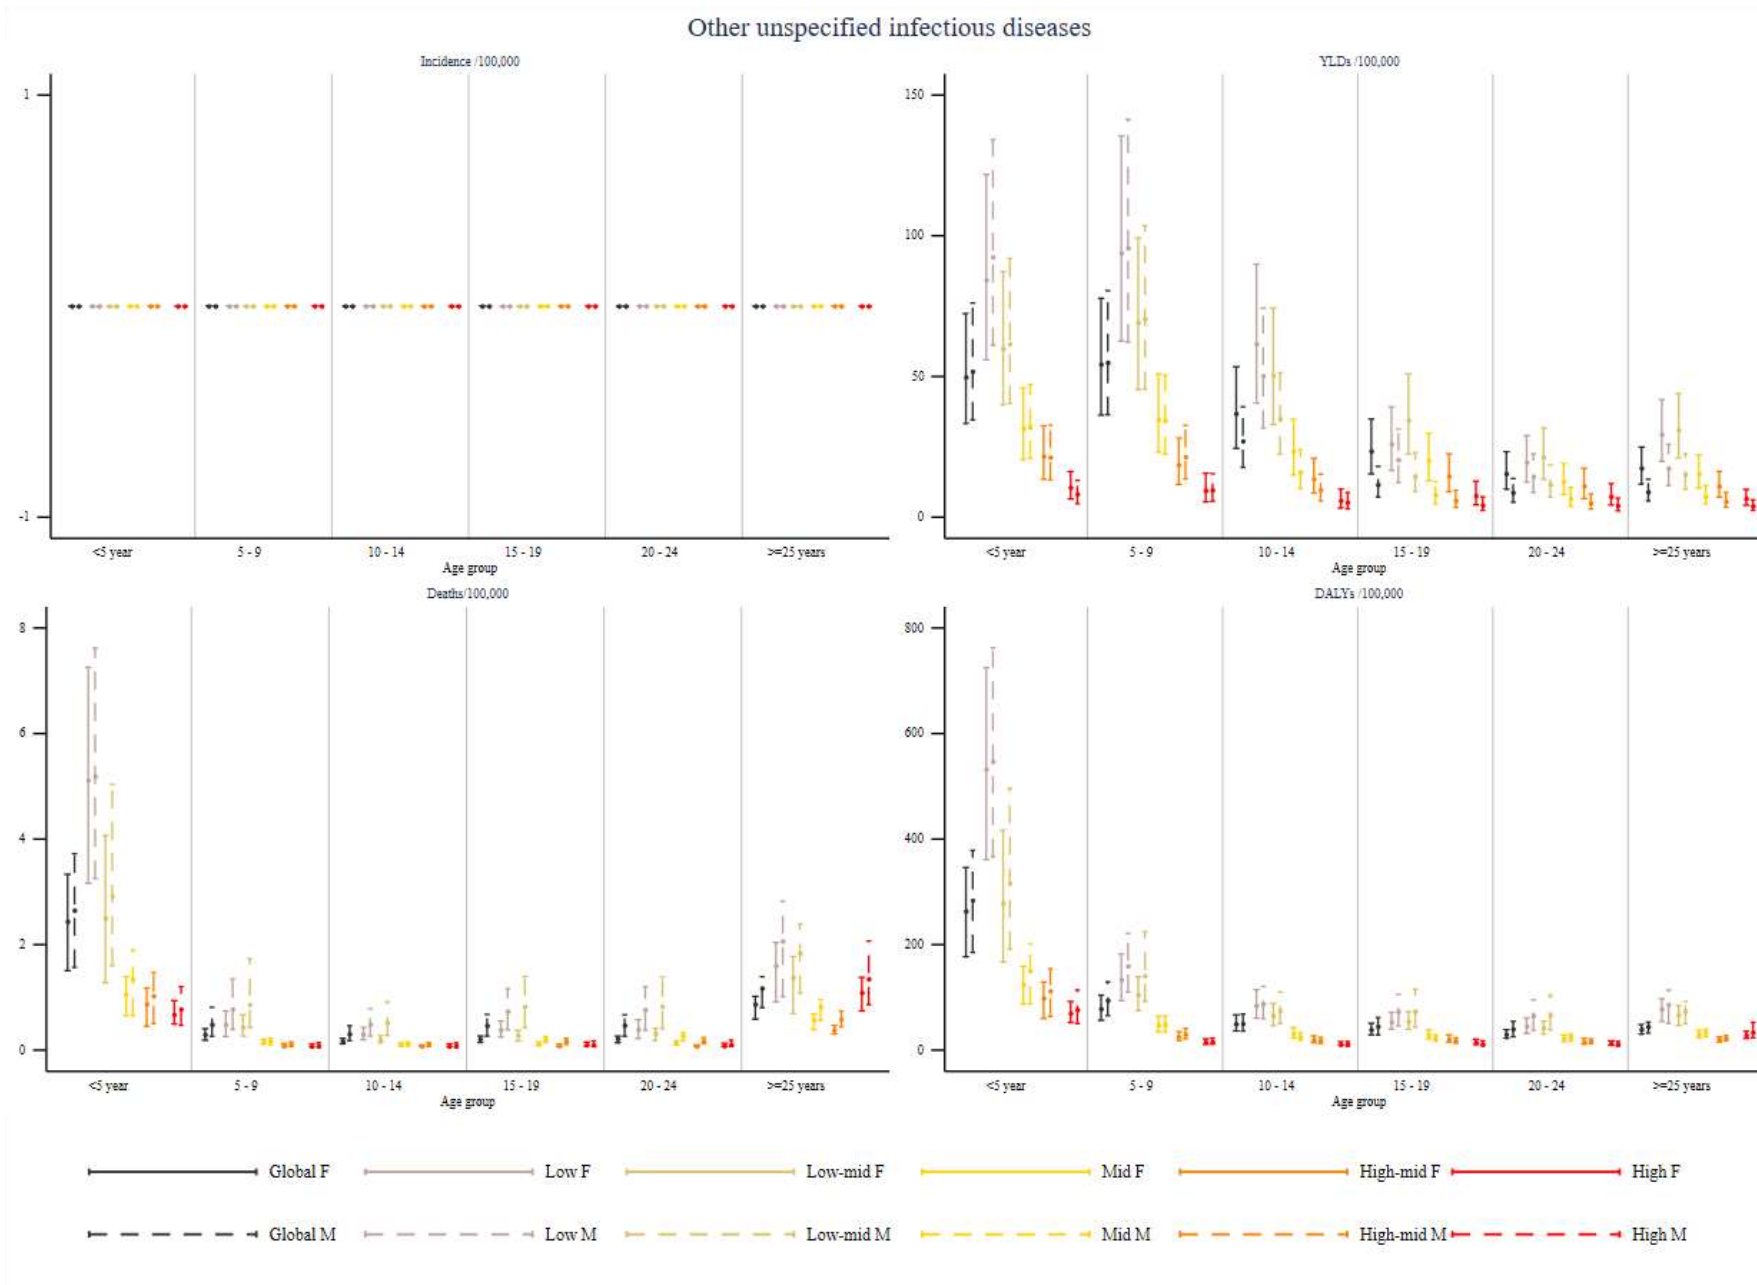

S17\_12 Part A: Rheumatic heart disease Incidence, YLD, death and DALY per 100 000 in 2019 for each age group

Rheumatic heart disease

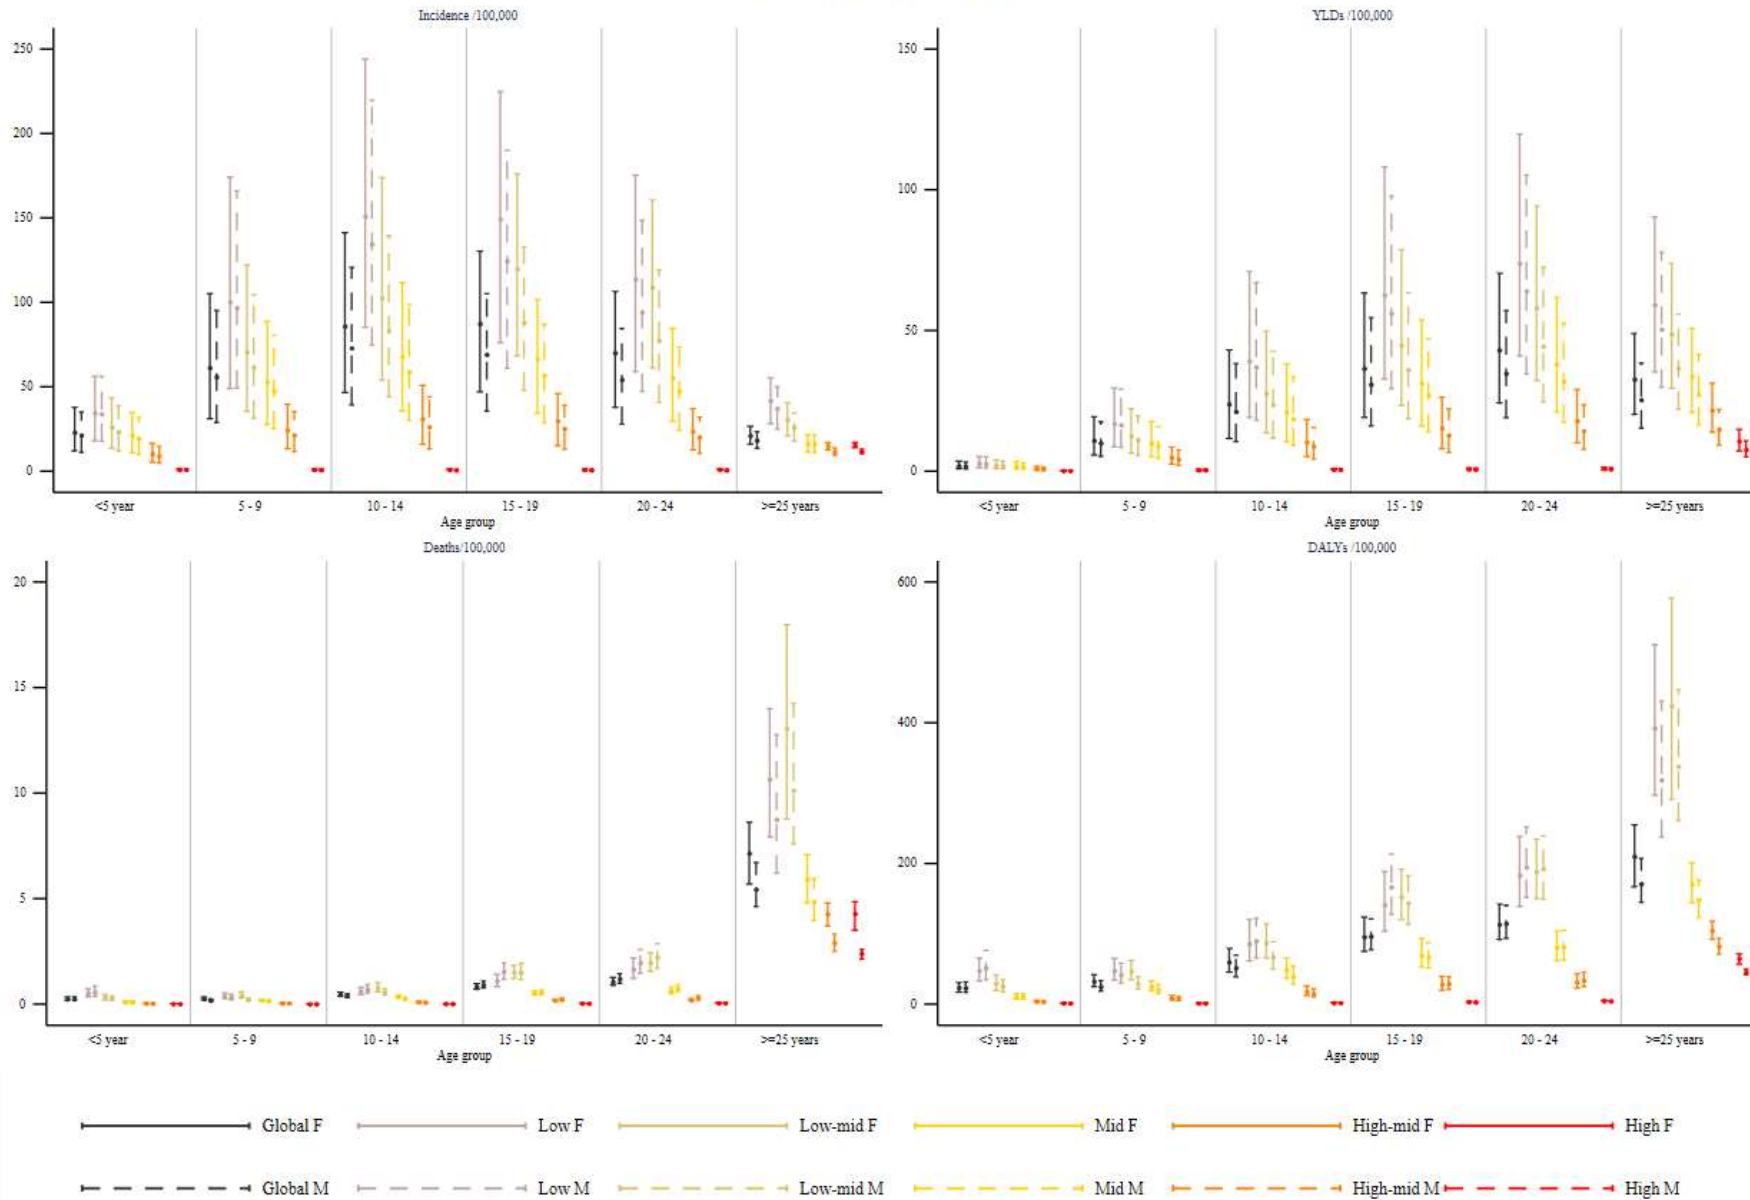

S17\_13 Part A: Sexually transmitted infections excluding HIV Incidence, YLD, death and DALY per 100 000 in 2019 for each age group

Sexually transmitted infections excluding HIV

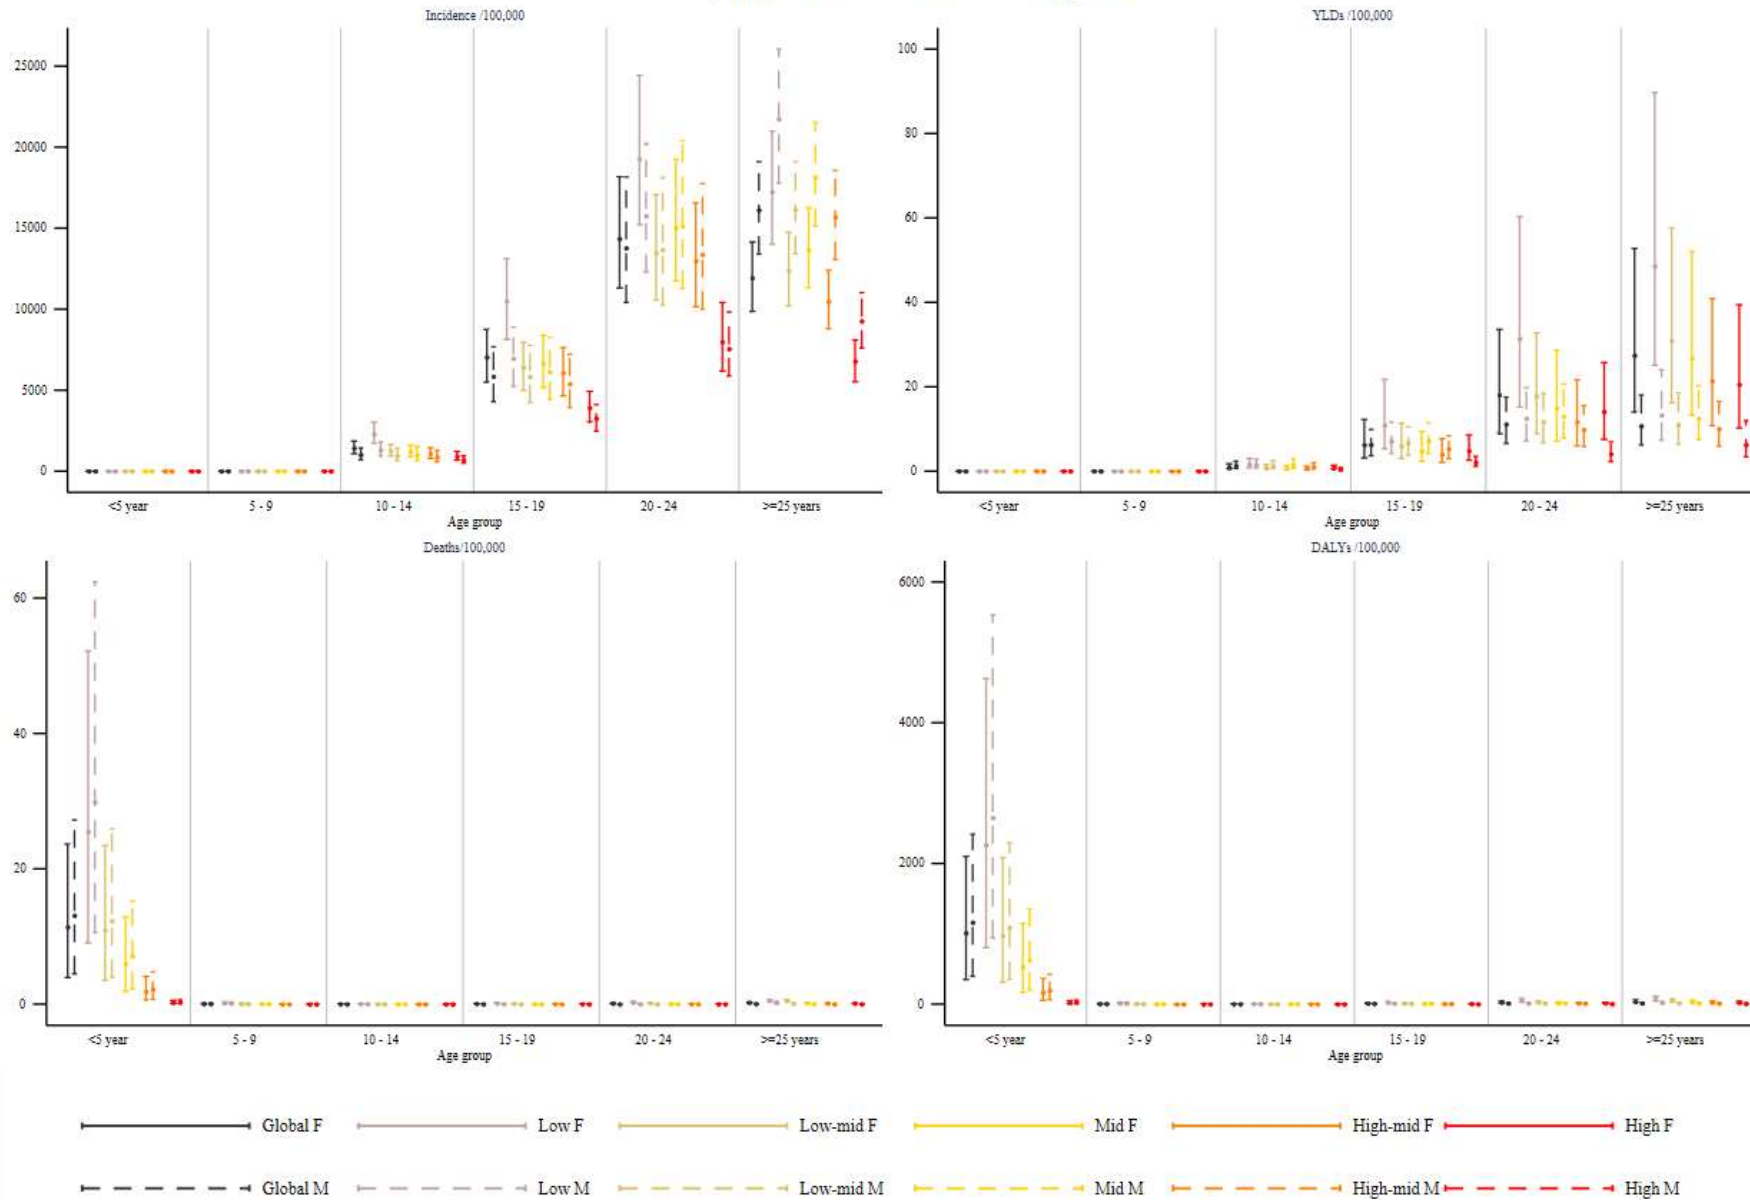



S17\_13 Part B: Contribution of individual causes for death/100,000 and DALYs/ 100,00 for Sexually transmitted infections excluding HIV in 2019

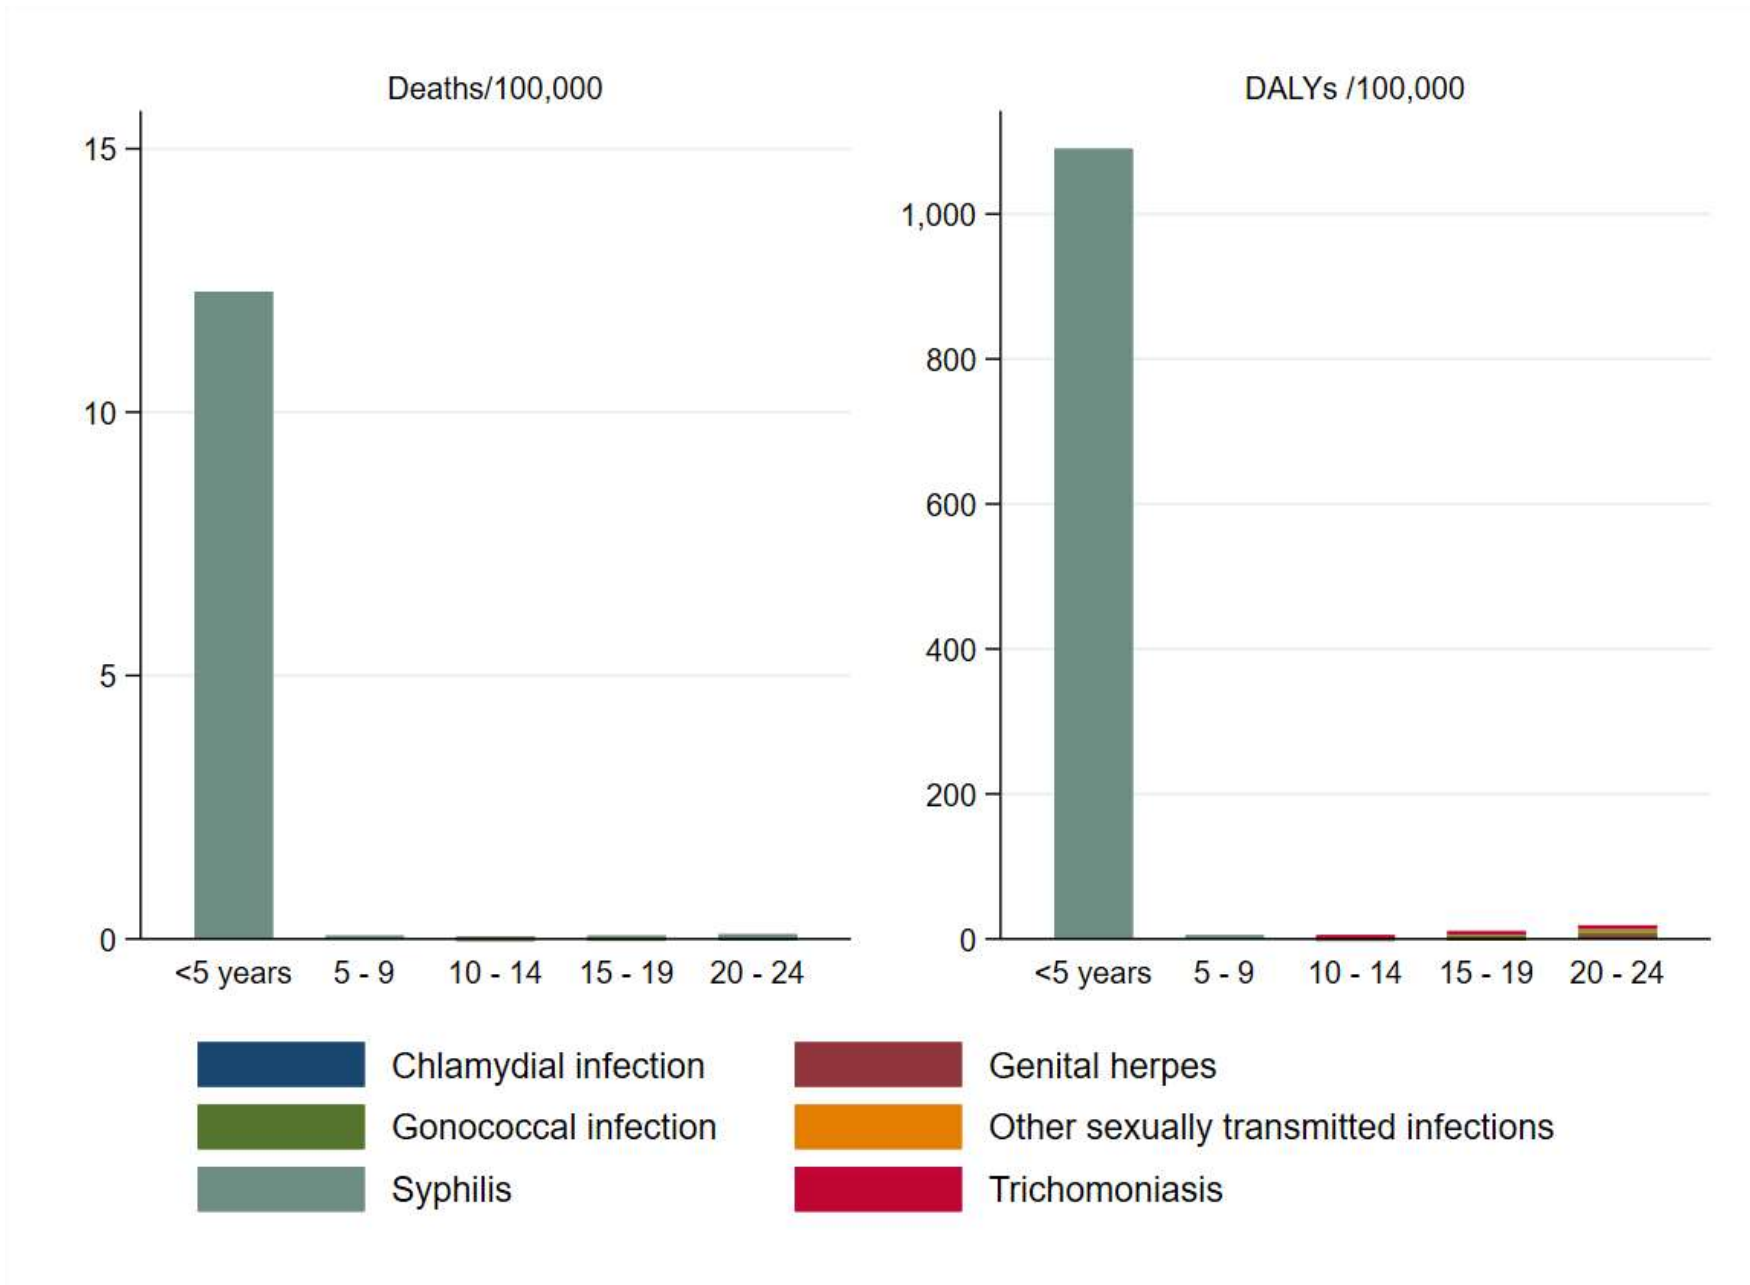

S17\_14 Part A: Tuberculosis Incidence, YLD, death and DALY per 100 000 in 2019 for each age group

Tuberculosis

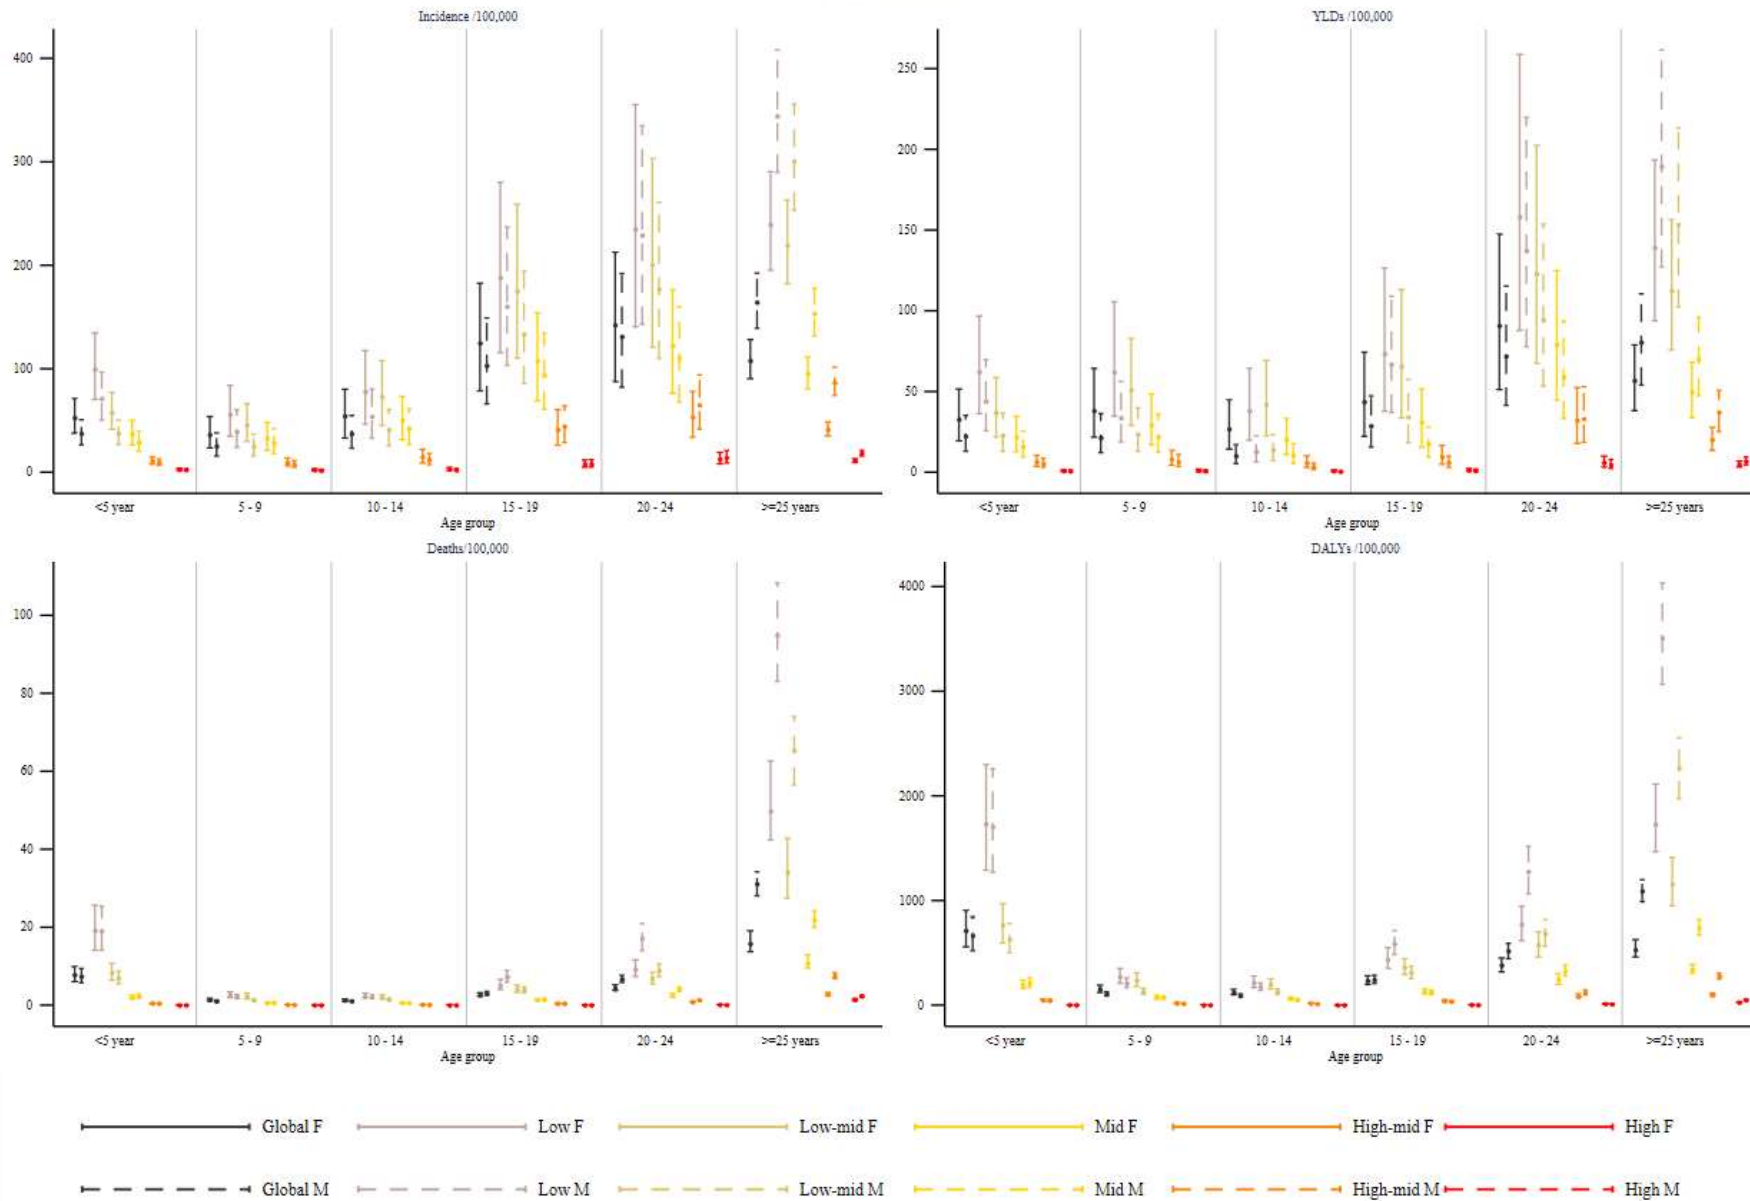

S17\_14 Part B: Contribution of individual causes for death/100,000 and DALYs/ 100,00 for Tuberculosis in 2019

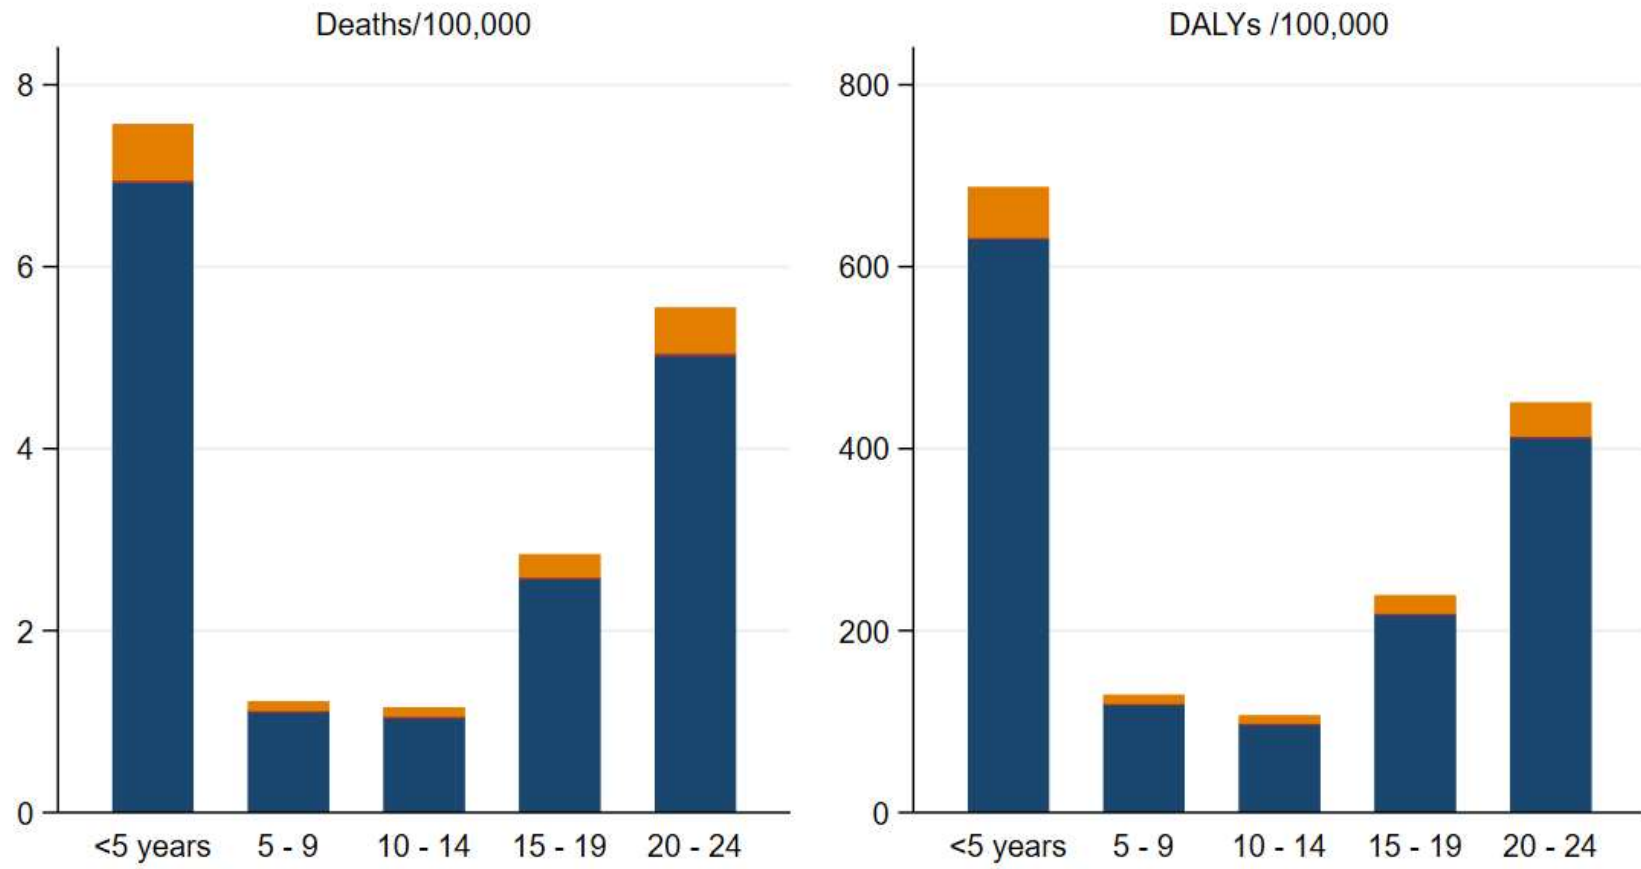

- Drug-susceptible tuberculosis
- Extensively drug-resistant tuberculosis
- Latent tuberculosis infection
- Multidrug-resistant tuberculosis without extensive drug resistance

S17\_15 Part A: Upper respiratory infections Incidence, YLD, death and DALY per 100 000 in 2019 for each age group

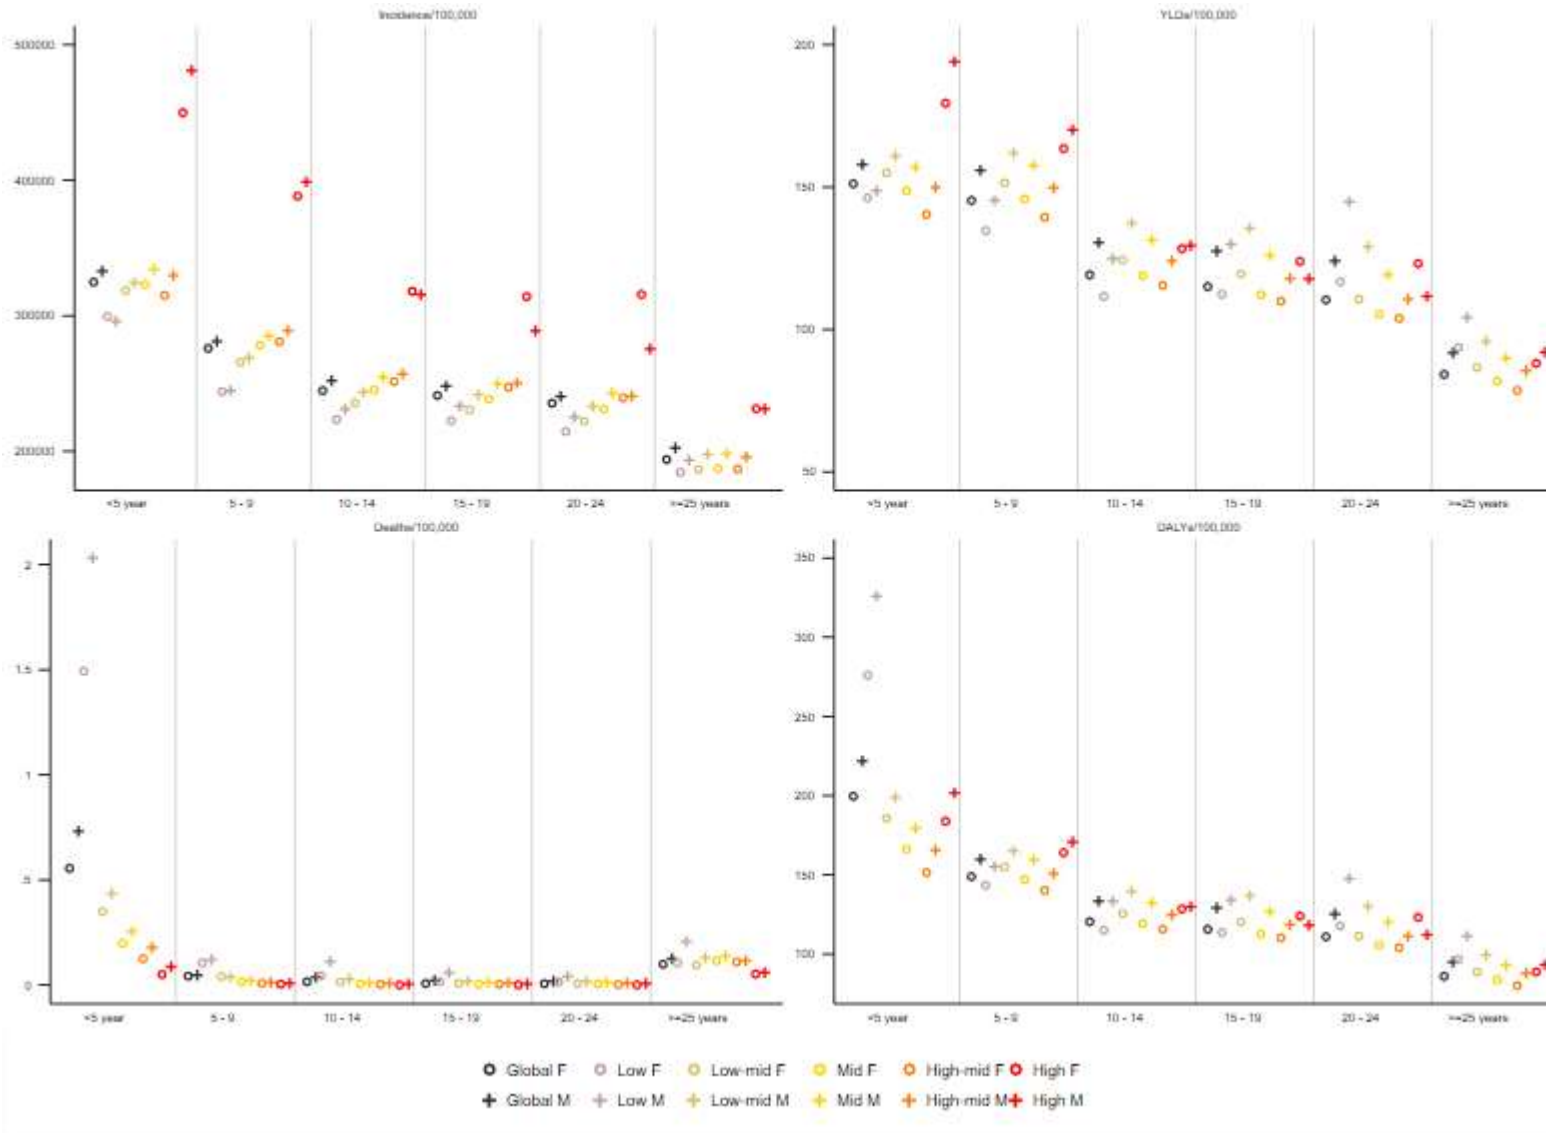

S17\_15 Part B: Contribution of individual causes for death/100,000 and DALYs/ 100,00 for Upper respiratory infections in 2019

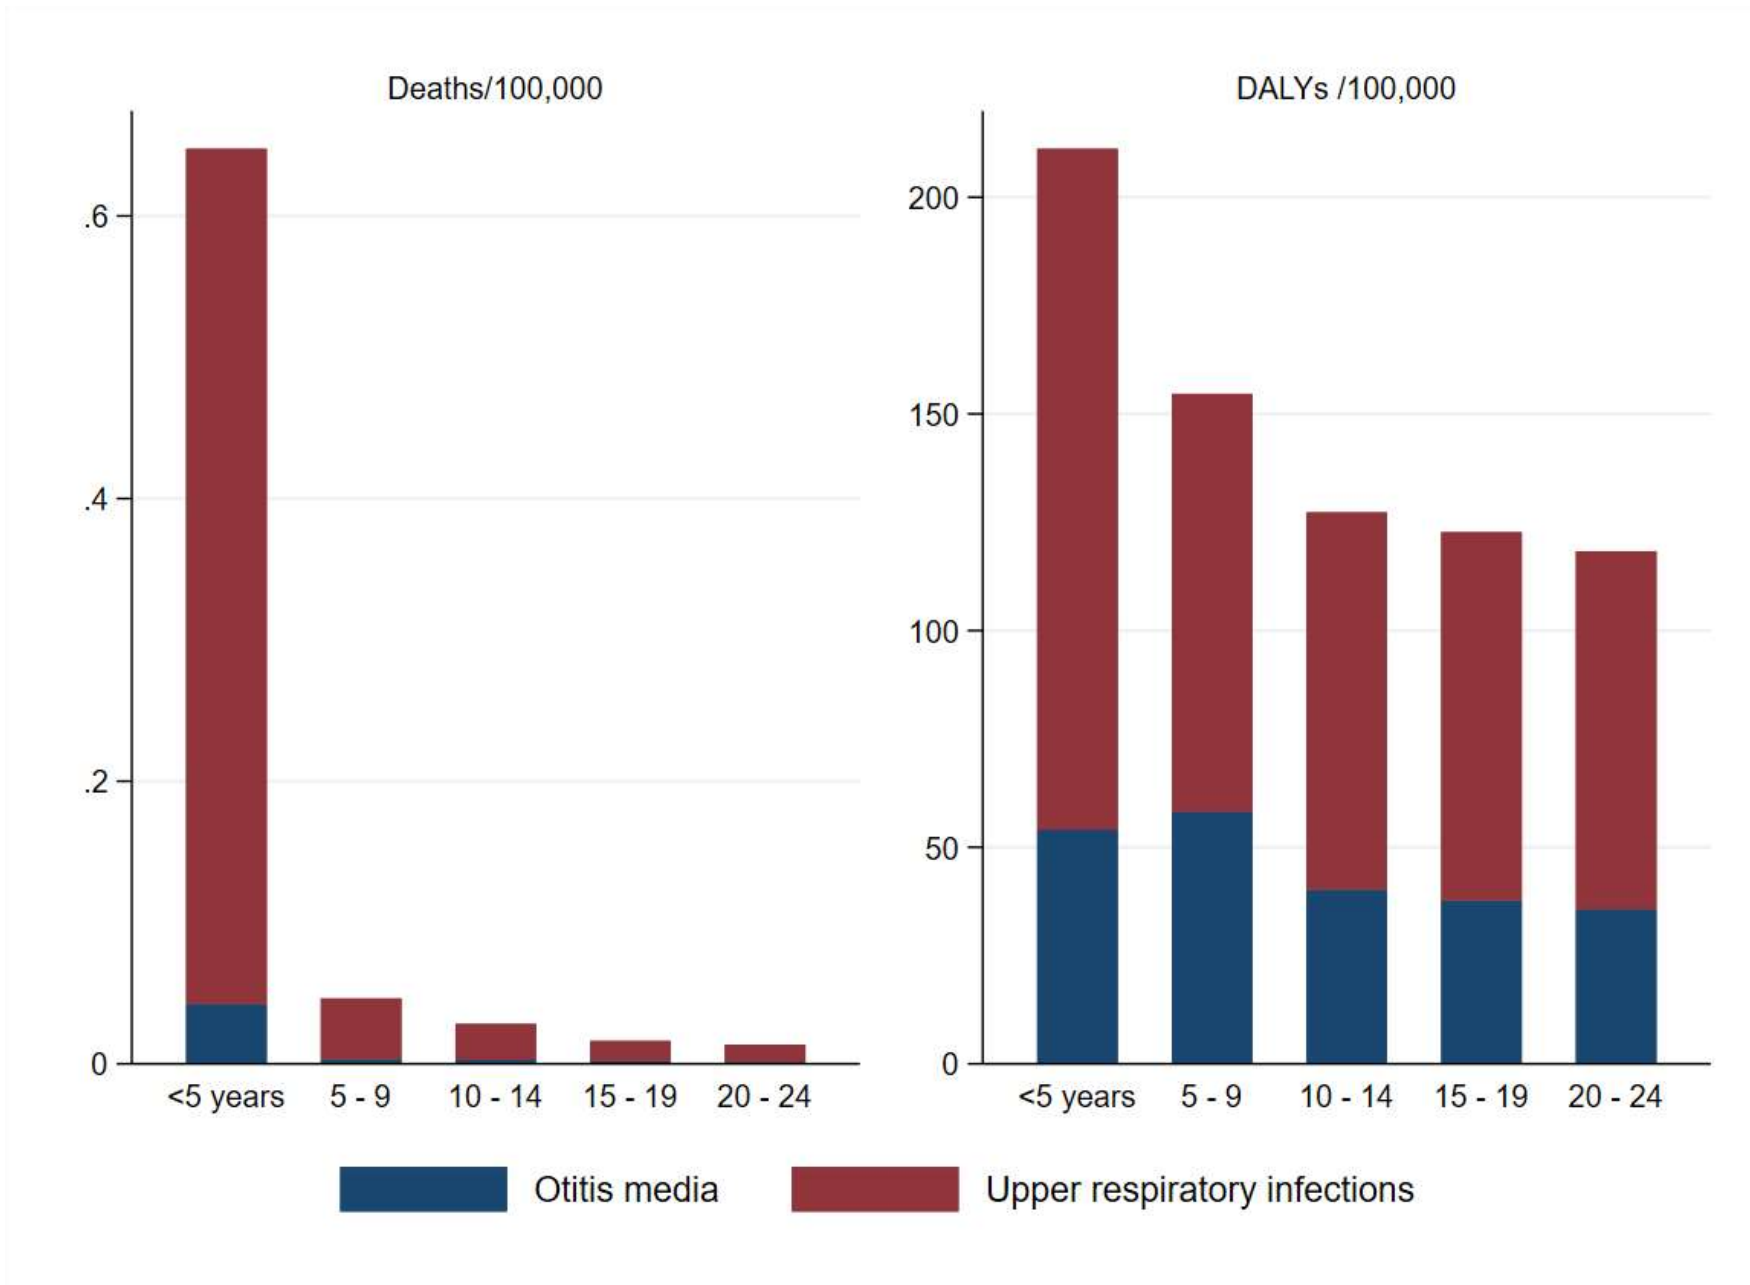

S17\_16 Part A: Vaccine preventable diseases Incidence, YLD, death and DALY per 100 000 in 2019 for each age group

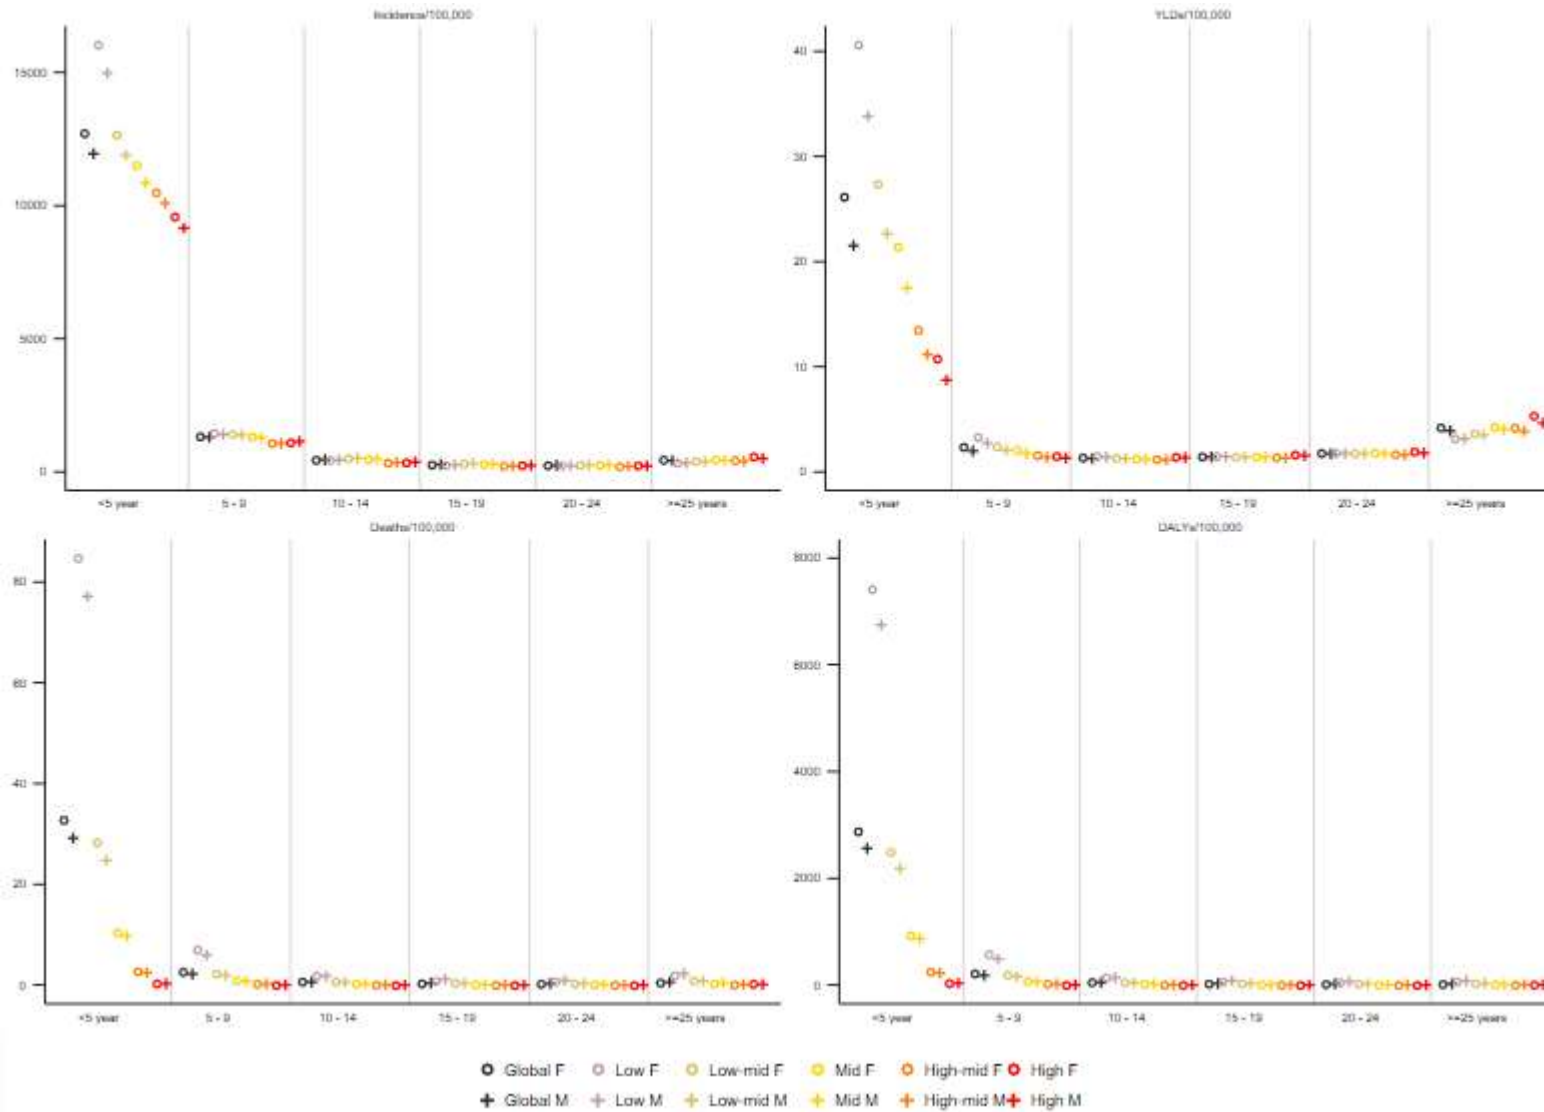

S17\_16 Part B: Contribution of individual causes for death/100,000 and DALYs/ 100,00 for Vaccine preventable diseases in 2019

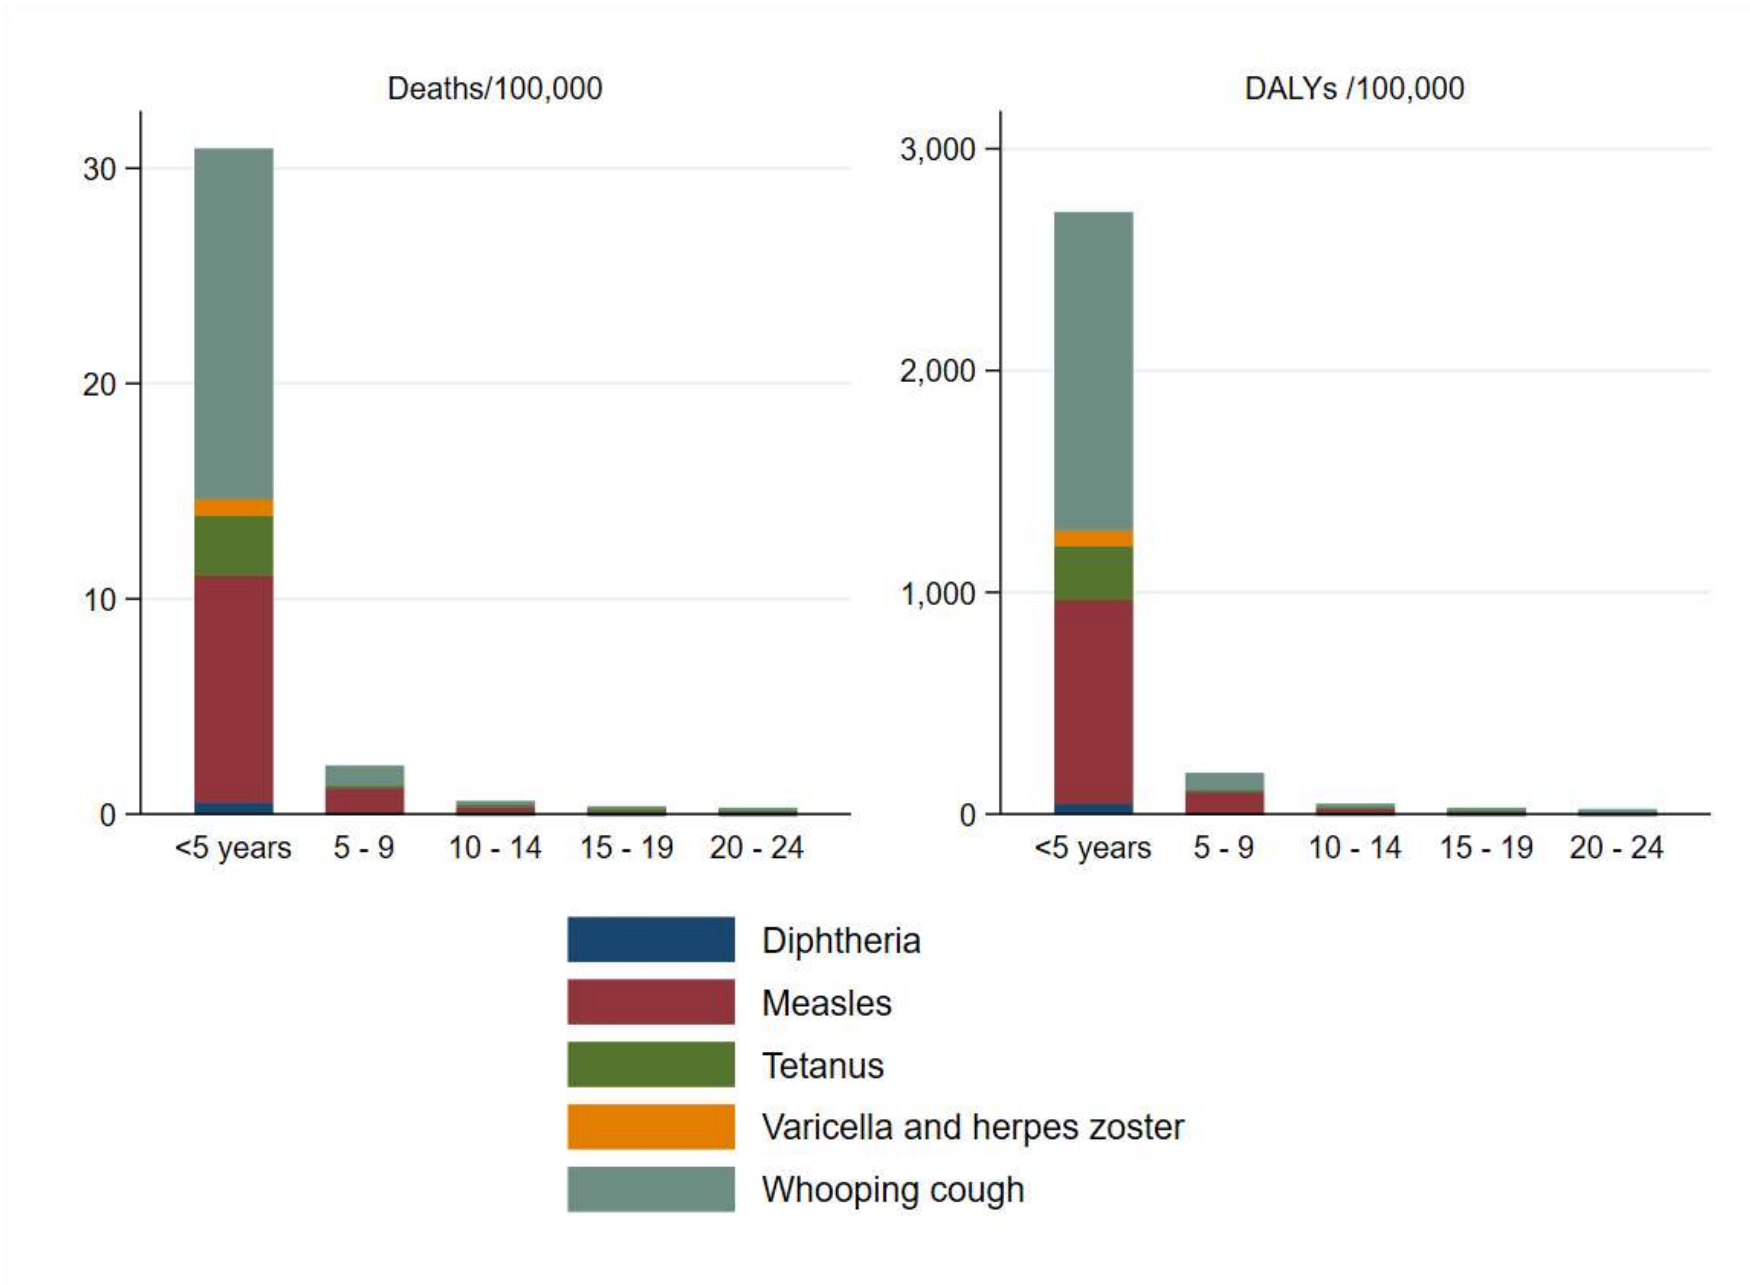

S18. HIV mortality to incidence ratio for males and females, aged <5 years, 15-19 and 20-24, in 2019.

Note that the MIR for 15-19 year old females in Syria is not shown (32).

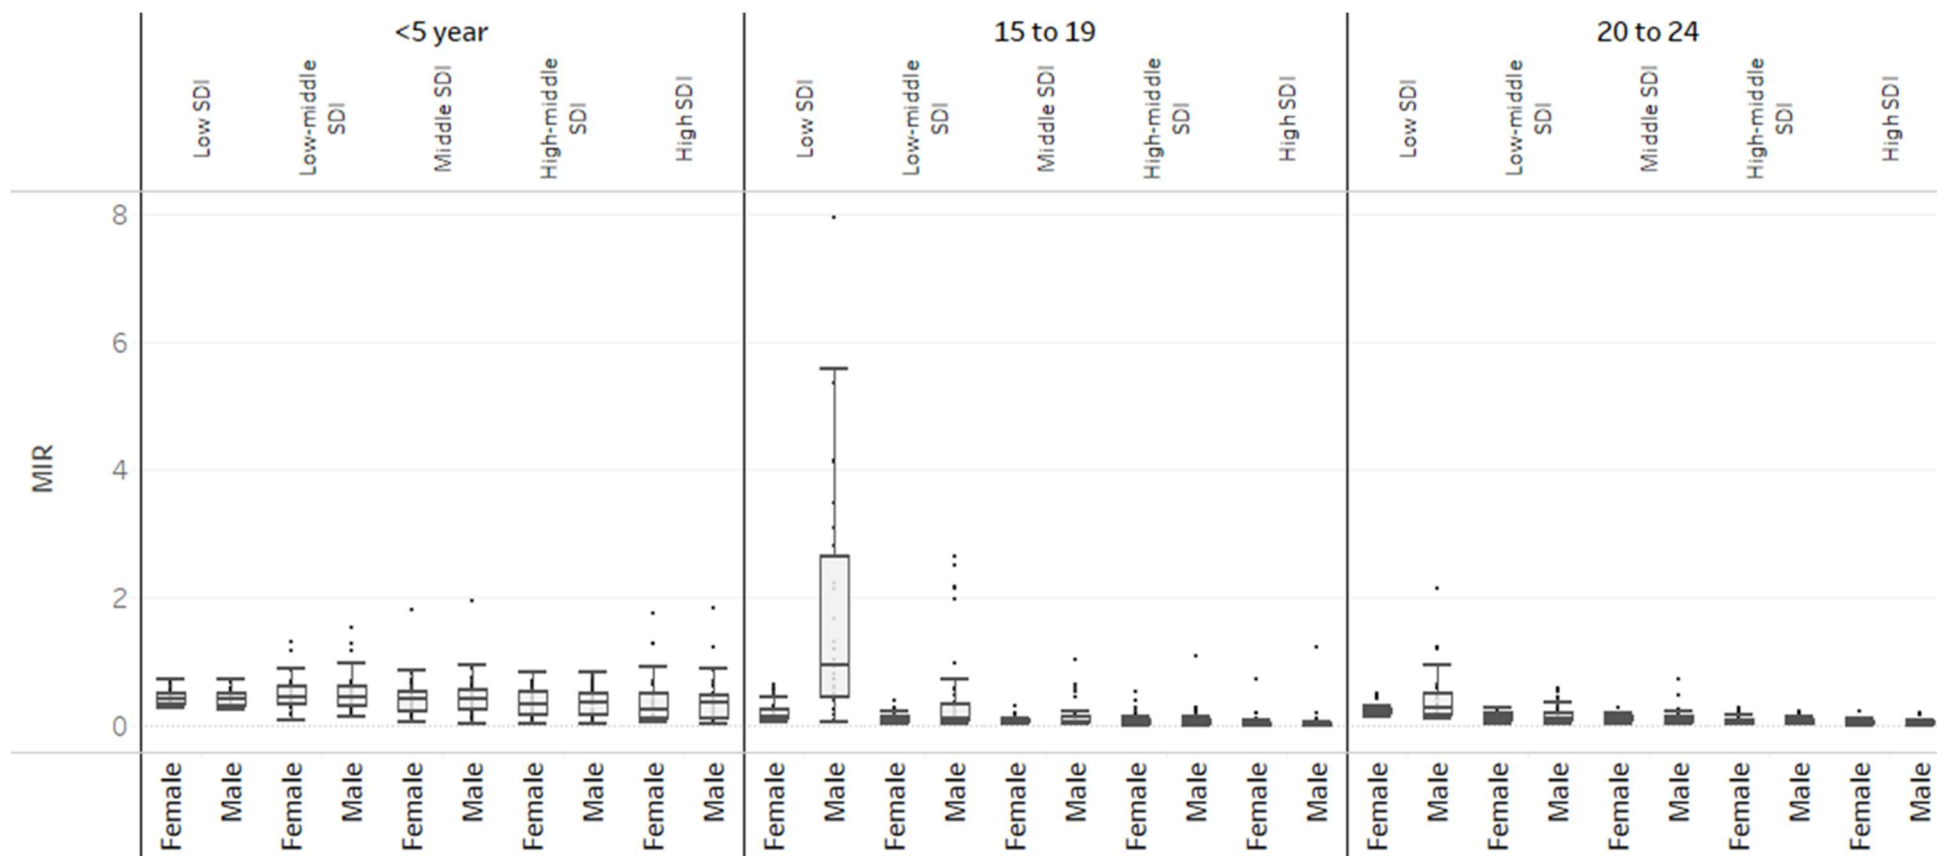



**S19. Mortality to Incidence ratio by location for HIV, for females and males aged less than 5 years, 15 to 19 years and 20 to 24 years. The colour on this figure is green shades for those locations with a value less than 1.6 (the global average) and yellow to dark orange spectrum for MIR increasing from 1.6.**

|                          | <5 year |       | 15 to 19 |       | 20 to 24 |       |                    | <5 year |       | 15 to 19 |       | 20 to 24 |       |
|--------------------------|---------|-------|----------|-------|----------|-------|--------------------|---------|-------|----------|-------|----------|-------|
|                          | Female  | Male  | Female   | Male  | Female   | Male  |                    | Female  | Male  | Female   | Male  | Female   | Male  |
| Afghanistan              | 0.649   | 0.653 | 0.054    | 0.058 | 0.218    | 0.221 | Djibouti           | 0.652   | 0.662 | 0.259    | 2.136 | 0.269    | 0.317 |
| Albania                  | 0.451   | 0.405 | 0.112    | 0.061 | 0.163    | 0.461 | Dominica           | 0.137   | 0.135 | 0.066    | 0.094 | 0.039    | 0.042 |
| Algeria                  | 0.335   | 0.367 | 0.053    | 0.071 | 0.144    | 0.163 | Dominican Republic | 0.455   | 0.480 | 0.049    | 0.099 | 0.121    | 0.141 |
| American Samoa           | 0.692   | 0.377 | 0.046    | 0.048 | 0.075    | 0.109 | Ecuador            | 0.526   | 0.577 | 0.048    | 0.045 | 0.072    | 0.063 |
| Andorra                  | 0.147   | 0.349 | 0.013    | 0.022 | 0.042    | 0.078 | Egypt              | 0.312   | 0.260 | 0.030    | 0.040 | 0.122    | 0.085 |
| Angola                   | 0.609   | 0.613 | 0.072    | 0.353 | 0.160    | 0.114 | El Salvador        | 0.874   | 0.971 | 0.098    | 0.075 | 0.080    | 0.066 |
| Antigua and Barbuda      | 0.127   | 0.125 | 0.060    | 0.074 | 0.038    | 0.037 | Equatorial Guinea  | 0.280   | 0.276 | 0.067    | 0.446 | 0.118    | 0.099 |
| Argentina                | 0.012   | 0.012 | 0.012    | 0.016 | 0.023    | 0.027 | Eritrea            | 0.596   | 0.587 | 0.485    | 5.337 | 0.444    | 1.214 |
| Armenia                  | 0.053   | 0.031 | 0.041    | 0.044 | 0.030    | 0.062 | Estonia            | 0.235   | 0.250 | 0.026    | 0.021 | 0.039    | 0.050 |
| Australia                | 0.120   | 0.046 | 0.006    | 0.002 | 0.015    | 0.005 | Eswatini           | 0.288   | 0.298 | 0.065    | 0.314 | 0.147    | 0.136 |
| Austria                  | 0.092   | 0.100 | 0.017    | 0.011 | 0.010    | 0.014 | Ethiopia           | 0.406   | 0.414 | 0.573    | 5.563 | 0.464    | 1.185 |
| Azerbaijan               | 0.196   | 0.313 | 0.034    | 0.057 | 0.047    | 0.034 | Fiji               | 0.461   | 0.672 | 0.063    | 0.159 | 0.076    | 0.096 |
| Bahamas                  | 0.531   | 0.508 | 0.031    | 0.036 | 0.089    | 0.068 | Finland            | 0.306   | 0.298 | 0.004    | 0.007 | 0.009    | 0.014 |
| Bahrain                  | 0.338   | 0.496 | 0.261    | 0.120 | 0.079    | 0.096 | France             | 0.354   | 0.372 | 0.010    | 0.011 | 0.016    | 0.017 |
| Bangladesh               | 0.666   | 0.658 | 0.096    | 0.082 | 0.133    | 0.102 | Gabon              | 0.447   | 0.410 | 0.071    | 0.587 | 0.140    | 0.150 |
| Barbados                 | 0.363   | 0.383 | 0.036    | 0.053 | 0.055    | 0.043 | Gambia             | 0.320   | 0.307 | 0.108    | 0.708 | 0.162    | 0.162 |
| Belarus                  | 0.171   | 0.218 | 0.226    | 1.083 | 0.031    | 0.040 | Georgia            | 0.021   | 0.060 | 0.018    | 0.009 | 0.021    | 0.041 |
| Belgium                  | 0.120   | 0.118 | 0.006    | 0.007 | 0.011    | 0.010 | Germany            | 0.388   | 0.370 | 0.010    | 0.011 | 0.017    | 0.018 |
| Belize                   | 0.169   | 0.173 | 0.065    | 0.096 | 0.070    | 0.057 | Ghana              | 0.588   | 0.553 | 0.232    | 2.630 | 0.254    | 0.532 |
| Benin                    | 0.547   | 0.527 | 0.192    | 2.620 | 0.200    | 0.457 | Greece             | 0.315   | 0.216 | 0.008    | 0.013 | 0.015    | 0.025 |
| Bermuda                  | 0.125   | 0.123 | 0.067    | 0.078 | 0.040    | 0.039 | Greenland          | 0.281   | 0.818 | 0.011    | 0.020 | 0.021    | 0.015 |
| Bhutan                   | 0.567   | 0.566 | 0.079    | 0.080 | 0.104    | 0.098 | Grenada            | 0.133   | 0.129 | 0.074    | 0.149 | 0.043    | 0.031 |
| Bolivia                  | 0.690   | 0.685 | 0.092    | 0.084 | 0.114    | 0.083 | Guam               | 0.918   | 0.373 | 0.053    | 0.050 | 0.098    | 0.194 |
| Bosnia and Herzegovina   | 0.214   | 0.397 | 0.045    | 0.049 | 0.182    | 0.045 | Guatemala          | 0.279   | 0.263 | 0.056    | 0.057 | 0.092    | 0.076 |
| Botswana                 | 0.460   | 0.480 | 0.062    | 0.205 | 0.148    | 0.207 | Guinea             | 0.356   | 0.347 | 0.080    | 0.584 | 0.171    | 0.142 |
| Brazil                   | 0.193   | 0.211 | 0.040    | 0.043 | 0.064    | 0.050 | Guinea-Bissau      | 0.334   | 0.462 | 0.162    | 2.796 | 0.188    | 0.423 |
| Brunei Darussalam        | 0.487   | 0.482 | 0.018    | 0.017 | 0.035    | 0.030 | Guyana             | 0.121   | 0.119 | 0.059    | 0.133 | 0.065    | 0.065 |
| Bulgaria                 | 0.662   | 0.318 | 0.046    | 0.037 | 0.085    | 0.050 | Haiti              | 0.675   | 0.585 | 0.200    | 1.197 | 0.224    | 0.306 |
| Burkina Faso             | 0.318   | 0.326 | 0.447    | 3.452 | 0.427    | 1.217 | Honduras           | 0.187   | 0.245 | 0.061    | 0.115 | 0.056    | 0.040 |
| Burundi                  | 0.311   | 0.311 | 0.645    | 7.924 | 0.506    | 2.137 | Hungary            | 0.598   | 0.656 | 0.026    | 0.028 | 0.106    | 0.066 |
| Cabo Verde               | 0.277   | 0.244 | 0.125    | 2.167 | 0.120    | 0.425 | Iceland            | 1.748   | 1.839 | 0.093    | 0.023 | 0.111    | 0.018 |
| Cambodia                 | 0.316   | 0.446 | 0.392    | 0.958 | 0.279    | 0.422 | India              | 0.320   | 0.301 | 0.235    | 0.477 | 0.192    | 0.120 |
| Cameroon                 | 0.357   | 0.350 | 0.132    | 0.724 | 0.279    | 0.271 | Indonesia          | 0.586   | 0.939 | 0.048    | 0.044 | 0.150    | 0.091 |
| Canada                   | 0.483   | 0.430 | 0.008    | 0.011 | 0.016    | 0.012 | Iran               | 0.518   | 0.585 | 0.047    | 0.045 | 0.158    | 0.125 |
| Central African Republic | 0.307   | 0.290 | 0.202    | 2.120 | 0.254    | 0.484 | Iraq               | 0.675   | 0.604 | 0.047    | 0.055 | 0.128    | 0.122 |
| Chad                     | 0.348   | 0.330 | 0.111    | 0.908 | 0.191    | 0.200 | Ireland            | 0.347   | 0.321 | 0.008    | 0.006 | 0.011    | 0.011 |
| Chile                    | 0.102   | 0.100 | 0.011    | 0.011 | 0.024    | 0.019 | Israel             | 0.204   | 0.179 | 0.006    | 0.008 | 0.016    | 0.016 |
| China                    | 0.853   | 0.633 | 0.092    | 0.068 | 0.125    | 0.086 | Italy              | 0.149   | 0.152 | 0.008    | 0.012 | 0.016    | 0.016 |
| Colombia                 | 1.791   | 1.923 | 0.051    | 0.044 | 0.066    | 0.051 | Jamaica            | 0.798   | 0.756 | 0.048    | 0.074 | 0.097    | 0.095 |
| Comoros                  | 0.842   | 0.212 | 0.030    | 0.037 | 0.052    | 0.045 | Japan              | 0.502   | 0.615 | 0.003    | 0.006 | 0.010    | 0.012 |
| Congo                    | 0.375   | 0.383 | 0.250    | 2.485 | 0.243    | 0.577 | Jordan             | 0.685   | 0.714 | 0.163    | 0.217 | 0.221    | 0.131 |
| Cook Islands             | 0.420   | 0.425 | 0.042    | 0.042 | 0.081    | 0.071 | Kazakhstan         | 0.123   | 0.129 | 0.047    | 0.056 | 0.030    | 0.033 |
| Costa Rica               | 0.664   | 0.707 | 0.038    | 0.038 | 0.122    | 0.075 | Kenya              | 0.377   | 0.410 | 0.214    | 1.954 | 0.243    | 0.551 |
| Côte d'Ivoire            | 0.492   | 0.512 | 0.290    | 4.128 | 0.282    | 0.930 | Kiribati           | 0.419   | 0.597 | 0.080    | 0.102 | 0.096    | 0.117 |
| Croatia                  | 0.243   | 0.183 | 0.036    | 0.033 | 0.026    | 0.039 | Kuwait             | 1.283   | 0.882 | 0.009    | 0.010 | 0.025    | 0.026 |
| Cuba                     | 0.046   | 0.069 | 0.044    | 0.038 | 0.052    | 0.060 | Kyrgyzstan         | 0.161   | 0.183 | 0.023    | 0.018 | 0.021    | 0.028 |
| Cyprus                   | 0.142   | 0.429 | 0.022    | 0.013 | 0.070    | 0.037 | Lao PDR            | 0.614   | 0.598 | 0.102    | 0.081 | 0.108    | 0.110 |
| Czechia                  | 0.908   | 0.865 | 0.022    | 0.008 | 0.089    | 0.047 | Latvia             | 0.313   | 0.358 | 0.053    | 0.043 | 0.045    | 0.023 |
| Dem Rep of the Congo     | 0.300   | 0.299 | 0.268    | 2.219 | 0.307    | 0.582 | Lebanon            | 0.672   | 0.696 | 0.076    | 0.065 | 0.279    | 0.194 |
| Denmark                  | 0.071   | 0.074 | 0.006    | 0.010 | 0.013    | 0.016 | Lesotho            | 0.362   | 0.362 | 0.089    | 0.289 | 0.157    | 0.162 |
| DPR Korea                | 0.633   | 0.638 | 0.082    | 0.067 | 0.154    | 0.123 | Liberia            | 0.409   | 0.385 | 0.129    | 1.020 | 0.220    | 0.227 |

|                                  | <5 year |       | 15 to 19 |       | 20 to 24 |       |                                  | <5 year |      | 15 to 19 |      | 20 to 24 |      |
|----------------------------------|---------|-------|----------|-------|----------|-------|----------------------------------|---------|------|----------|------|----------|------|
|                                  | Female  | Male  | Female   | Male  | Female   | Male  |                                  | Female  | Male | Female   | Male | Female   | Male |
| Libya                            | 0.510   | 0.544 | 0.054    | 0.072 | 0.233    | 0.215 | Saint Lucia                      | 0.15    | 0.15 | 0.08     | 0.15 | 0.04     | 0.04 |
| Lithuania                        | 0.067   | 0.060 | 0.195    | 0.111 | 0.089    | 0.040 | Saint Vincent and the Grenadines | 0.21    | 0.21 | 0.11     | 0.20 | 0.06     | 0.05 |
| Luxembourg                       | 0.644   | 0.636 | 0.014    | 0.015 | 0.015    | 0.016 | Samoa                            | 0.40    | 0.40 | 0.05     | 0.06 | 0.12     | 0.09 |
| Madagascar                       | 0.364   | 0.374 | 0.094    | 0.492 | 0.180    | 0.120 | San Marino                       | 0.28    | 0.35 | 0.03     | 0.03 | 0.05     | 0.04 |
| Malawi                           | 0.496   | 0.507 | 0.074    | 0.448 | 0.164    | 0.162 | Sao Tome and Principe            | 0.60    | 0.17 | 0.03     | 0.05 | 0.05     | 0.05 |
| Malaysia                         | 0.612   | 0.551 | 0.529    | 0.285 | 0.063    | 0.041 | Saudi Arabia                     | 0.54    | 0.78 | 0.15     | 0.27 | 0.15     | 0.20 |
| Maldives                         | 0.285   | 1.515 | 0.069    | 0.240 | 0.142    | 0.089 | Senegal                          | 0.38    | 0.37 | 0.19     | 1.67 | 0.22     | 0.32 |
| Mali                             | 0.417   | 0.397 | 0.137    | 0.787 | 0.247    | 0.263 | Serbia                           | 0.83    | 0.41 | 0.38     | 0.08 | 0.08     | 0.07 |
| Malta                            | 0.041   | 0.041 | 0.006    | 0.010 | 0.008    | 0.015 | Seychelles                       | 0.25    | 0.48 | 0.05     | 0.08 | 0.11     | 0.06 |
| Marshall Islands                 | 0.440   | 0.421 | 0.053    | 0.065 | 0.115    | 0.065 | Sierra Leone                     | 0.091   | 0.32 | 0.07     | 0.23 | 0.23     | 0.18 |
| Mauritania                       | 0.443   | 0.126 | 0.054    | 0.084 | 0.063    | 0.060 | Singapore                        | 0.09    | 0.02 | 0.04     | 0.01 | 0.02     | 0.01 |
| Mauritius                        | 0.118   | 0.124 | 0.025    | 0.042 | 0.058    | 0.081 | Slovakia                         | 0.23    | 0.35 | 0.04     | 0.05 | 0.10     | 0.16 |
| Mexico                           | 0.258   | 0.246 | 0.039    | 0.036 | 0.070    | 0.055 | Slovenia                         | 1.27    | 1.21 | 0.01     | 0.02 | 0.02     | 0.03 |
| Micronesia (Federated States of) | 0.545   | 0.564 | 0.079    | 0.092 | 0.137    | 0.125 | Solomon Islands                  | 0.52    | 0.50 | 0.06     | 0.08 | 0.12     | 0.10 |
| Monaco                           | 0.253   | 0.325 | 0.030    | 0.032 | 0.054    | 0.046 | Somalia                          | 0.48    | 0.47 | 0.55     | 4.11 | 0.42     | 0.63 |
| Mongolia                         | 0.648   | 0.664 | 0.068    | 0.050 | 0.148    | 0.118 | South Africa                     | 0.38    | 0.46 | 0.07     | 0.51 | 0.14     | 0.14 |
| Montenegro                       | 0.464   | 0.470 | 0.043    | 0.048 | 0.090    | 0.079 | South Sudan                      | 0.42    | 0.43 | 0.10     | 0.61 | 0.18     | 0.15 |
| Morocco                          | 0.497   | 0.511 | 0.077    | 0.143 | 0.207    | 0.276 | Spain                            | 0.38    | 0.35 | 0.01     | 0.01 | 0.02     | 0.02 |
| Mozambique                       | 0.450   | 0.460 | 0.082    | 0.231 | 0.216    | 0.147 | Sri Lanka                        | 0.53    | 0.63 | 0.05     | 0.04 | 0.12     | 0.10 |
| Myanmar                          | 0.319   | 0.322 | 0.225    | 0.306 | 0.144    | 0.098 | Sudan                            | 1.29    | 1.28 | 0.07     | 0.30 | 0.14     | 0.09 |
| Namibia                          | 0.417   | 0.411 | 0.180    | 1.028 | 0.181    | 0.239 | Suriname                         | 0.27    | 0.28 | 0.05     | 0.11 | 0.07     | 0.05 |
| Nauru                            | 0.448   | 0.422 | 0.046    | 0.047 | 0.082    | 0.074 | Sweden                           | 0.44    | 0.48 | 0.00     | 0.01 | 0.01     | 0.01 |
| Nepal                            | 0.715   | 0.713 | 0.236    | 0.166 | 0.136    | 0.124 | Switzerland                      | 0.48    | 0.51 | 0.01     | 0.01 | 0.01     | 0.01 |
| Netherlands                      | 0.071   | 0.068 | 0.008    | 0.008 | 0.014    | 0.011 | Syrian Arab Republic             | 0.35    | 0.33 | 32.01    | 0.04 | 0.15     | 0.25 |
| New Zealand                      | 0.079   | 0.111 | 0.006    | 0.006 | 0.016    | 0.011 | Taiwan (Province of China)       | 0.11    | 0.11 | 0.01     | 0.01 | 0.02     | 0.01 |
| Nicaragua                        | 0.547   | 0.451 | 0.067    | 0.062 | 0.087    | 0.065 | Tajikistan                       | 0.08    | 0.13 | 0.05     | 0.32 | 0.04     | 0.03 |
| Niger                            | 0.464   | 0.452 | 0.213    | 1.194 | 0.235    | 0.316 | Thailand                         | 0.43    | 0.44 | 0.04     | 0.04 | 0.09     | 0.07 |
| Nigeria                          | 0.437   | 0.424 | 0.118    | 0.564 | 0.190    | 0.165 | Timor-Leste                      | 0.48    | 0.46 | 0.18     | 0.18 | 0.24     | 0.18 |
| Niue                             | 0.442   | 0.416 | 0.046    | 0.049 | 0.083    | 0.074 | Togo                             | 0.28    | 0.26 | 0.29     | 3.06 | 0.24     | 0.58 |
| North Macedonia                  | 0.456   | 0.466 | 0.069    | 0.062 | 0.074    | 0.102 | Tokelau                          | 0.44    | 0.42 | 0.05     | 0.06 | 0.09     | 0.08 |
| Northern Mariana Islands         | 0.599   | 0.458 | 0.097    | 0.051 | 0.154    | 0.113 | Tonga                            | 0.63    | 0.39 | 0.04     | 0.05 | 0.11     | 0.14 |
| Norway                           | 0.077   | 0.062 | 0.008    | 0.006 | 0.015    | 0.010 | Trinidad and Tobago              | 0.33    | 0.34 | 0.05     | 0.09 | 0.06     | 0.06 |
| Oman                             | 0.399   | 0.325 | 0.126    | 0.225 | 0.050    | 0.068 | Tunisia                          | 0.50    | 0.53 | 0.04     | 0.04 | 0.28     | 0.70 |
| Pakistan                         | 0.309   | 0.310 | 0.051    | 0.046 | 0.120    | 0.093 | Turkey                           | 0.69    | 0.59 | 0.04     | 0.04 | 0.18     | 0.17 |
| Palau                            | 0.484   | 0.457 | 0.043    | 0.049 | 0.079    | 0.075 | Turkmenistan                     | 0.25    | 0.25 | 0.31     | 0.62 | 0.03     | 0.04 |
| Palestine                        | 0.609   | 0.586 | 0.071    | 0.068 | 0.259    | 0.223 | Tuvalu                           | 0.43    | 0.41 | 0.05     | 0.05 | 0.09     | 0.08 |
| Panama                           | 0.321   | 0.315 | 0.067    | 0.055 | 0.063    | 0.051 | Uganda                           | 0.31    | 0.30 | 0.12     | 0.95 | 0.13     | 0.19 |
| Papua New Guinea                 | 0.536   | 0.566 | 0.114    | 0.707 | 0.177    | 0.144 | Ukraine                          | 0.10    | 0.11 | 0.12     | 0.20 | 0.04     | 0.04 |
| Paraguay                         | 0.656   | 0.881 | 0.060    | 0.075 | 0.128    | 0.087 | United Arab Emirates             | 0.64    | 0.68 | 0.06     | 0.08 | 0.21     | 0.18 |
| Peru                             | 0.704   | 0.536 | 0.173    | 0.124 | 0.071    | 0.046 | United Kingdom                   | 0.17    | 0.18 | 0.01     | 0.00 | 0.01     | 0.01 |
| Philippines                      | 0.118   | 0.115 | 0.025    | 0.020 | 0.076    | 0.045 | United Republic of Tanzania      | 0.27    | 0.26 | 0.12     | 0.39 | 0.16     | 0.28 |
| Poland                           | 0.157   | 0.177 | 0.016    | 0.013 | 0.046    | 0.041 | United States of America         | 0.16    | 0.18 | 0.01     | 0.01 | 0.01     | 0.01 |
| Portugal                         | 0.633   | 0.599 | 0.017    | 0.021 | 0.031    | 0.032 | United States Virgin Islands     | 0.22    | 0.22 | 0.04     | 0.04 | 0.05     | 0.05 |
| Puerto Rico                      | 0.113   | 0.113 | 0.192    | 0.194 | 0.043    | 0.036 | Uruguay                          | 0.10    | 0.08 | 0.01     | 0.02 | 0.02     | 0.02 |
| Qatar                            | 0.676   | 0.500 | 0.716    | 1.207 | 0.075    | 0.171 | Uzbekistan                       | 0.06    | 0.10 | 0.07     | 0.10 | 0.03     | 0.04 |
| Republic of Korea                | 0.058   | 0.088 | 0.002    | 0.010 | 0.008    | 0.021 | Vanuatu                          | 0.46    | 0.44 | 0.06     | 0.07 | 0.12     | 0.09 |
| Republic of Moldova              | 0.042   | 0.059 | 0.017    | 0.027 | 0.036    | 0.034 | Venezuela                        | 1.17    | 1.15 | 0.04     | 0.04 | 0.07     | 0.05 |
| Romania                          | 0.171   | 0.167 | 0.045    | 0.073 | 0.052    | 0.047 | Viet Nam                         | 0.15    | 0.22 | 0.03     | 0.04 | 0.06     | 0.10 |
| Russian Federation               | 0.241   | 0.240 | 0.049    | 0.073 | 0.036    | 0.035 | Yemen                            | 0.66    | 0.68 | 0.05     | 0.06 | 0.20     | 0.21 |
| Rwanda                           | 0.284   | 0.275 | 0.162    | 1.308 | 0.211    | 0.445 | Zambia                           | 0.44    | 0.44 | 0.09     | 0.29 | 0.20     | 0.25 |
| Saint Kitts and Nevis            | 0.447   | 0.417 | 0.074    | 0.076 | 0.088    | 0.074 | Zimbabwe                         | 0.26    | 0.26 | 0.13     | 0.54 | 0.23     | 0.36 |

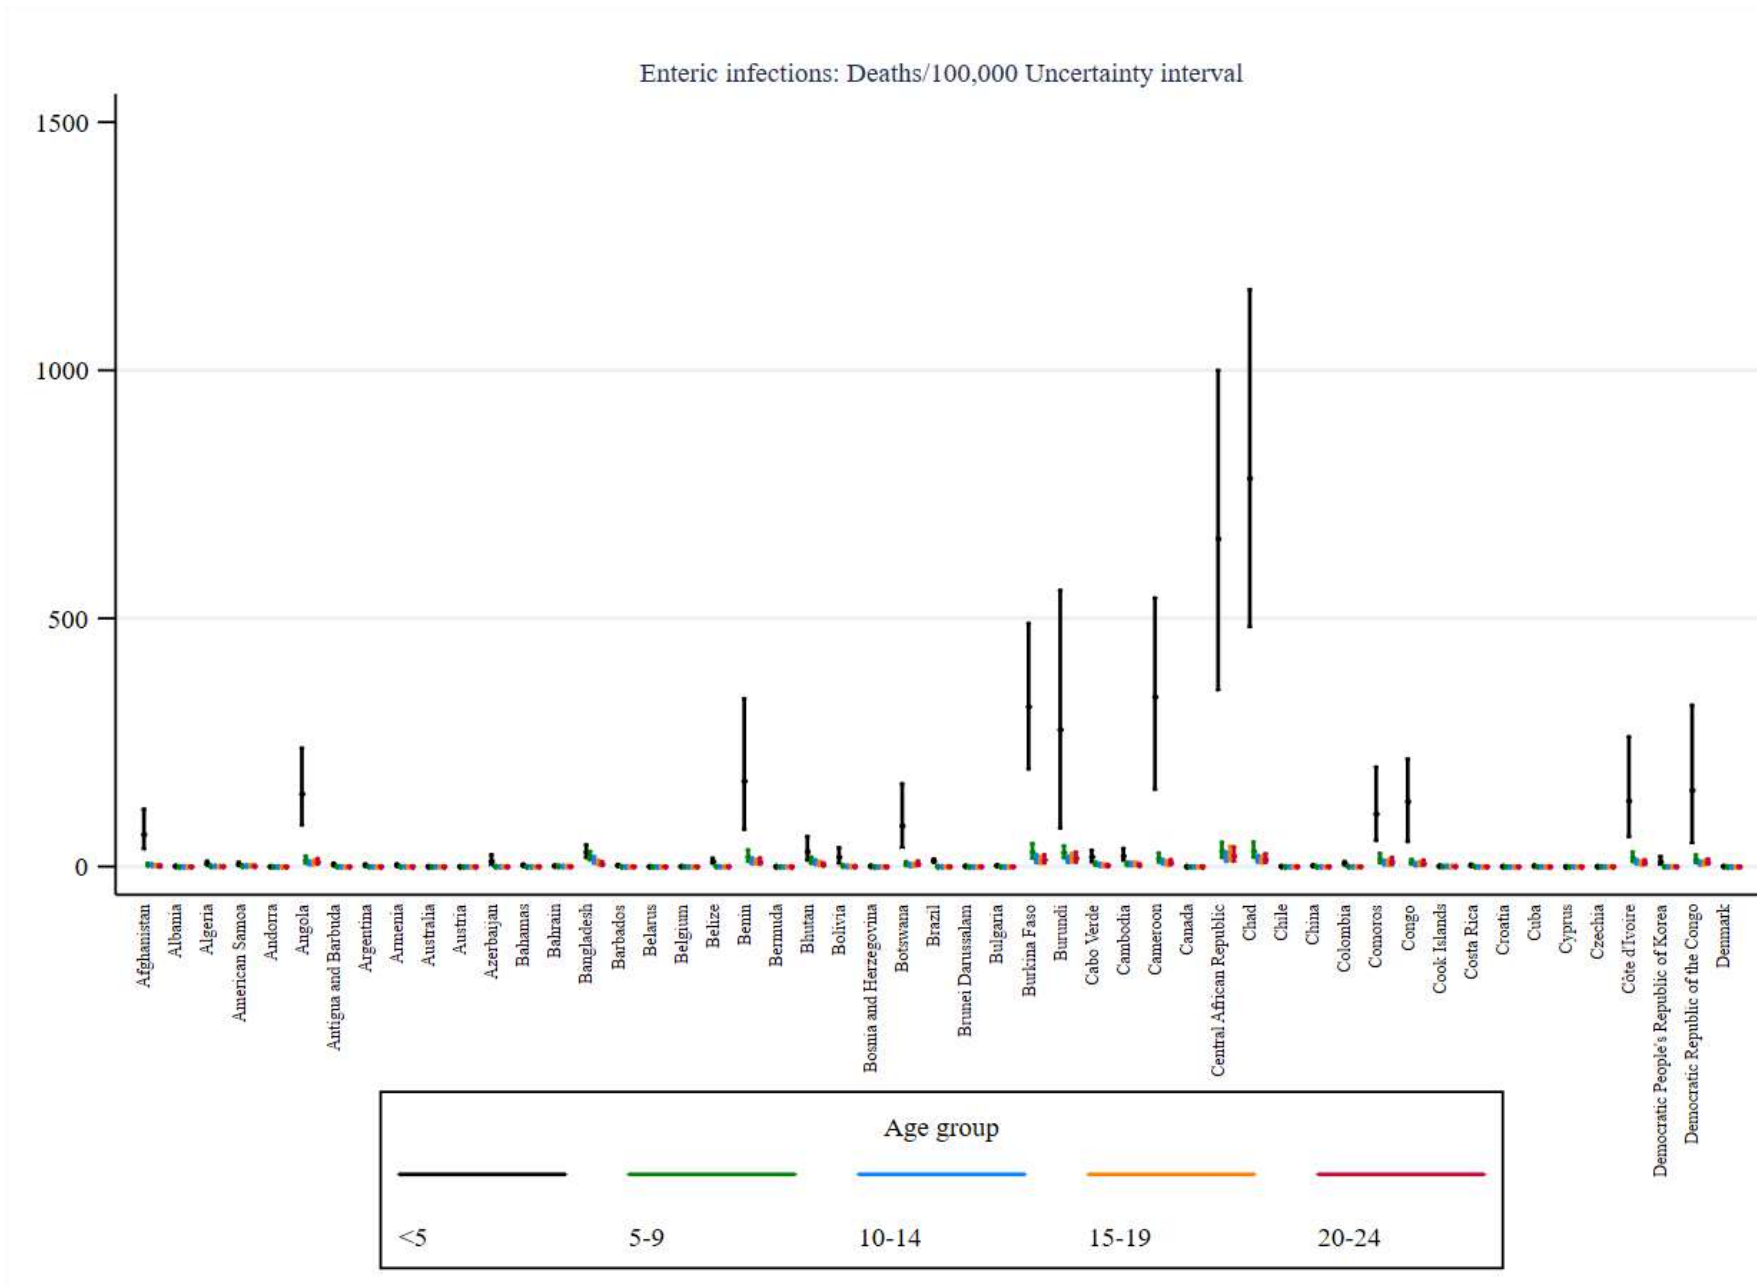

Enteric infections: Deaths/100,000 Uncertainty interval

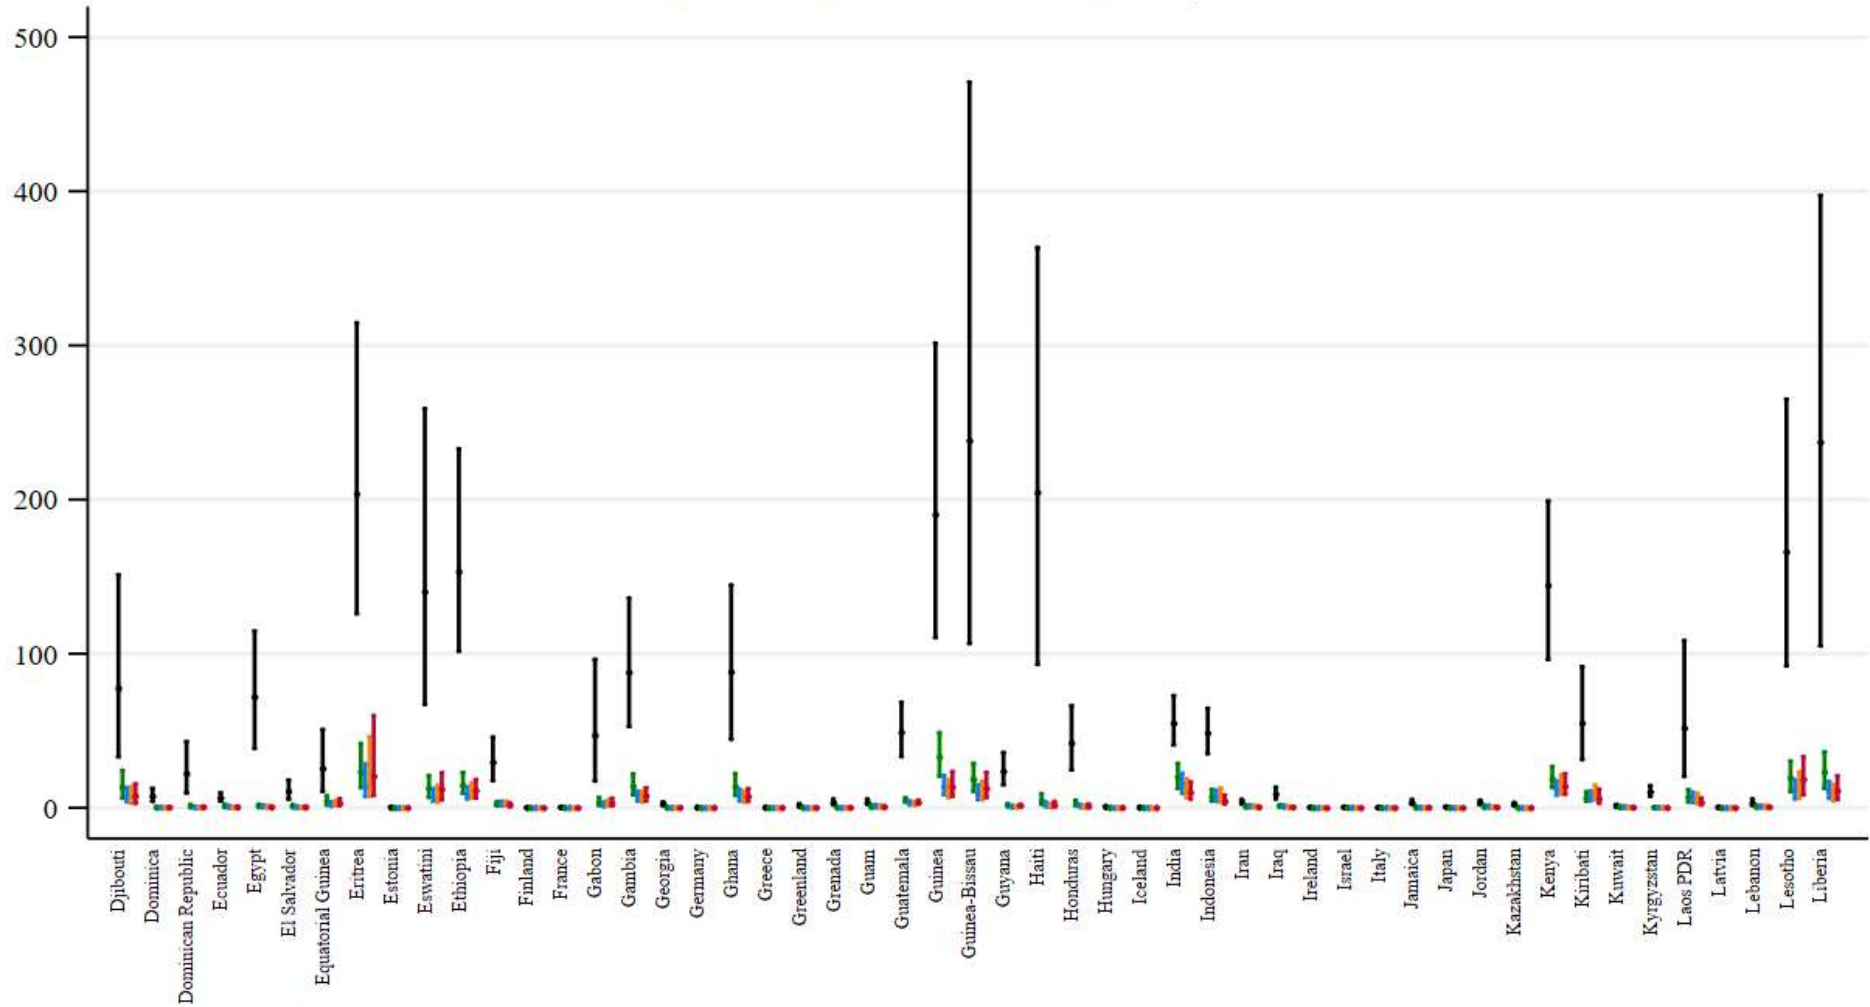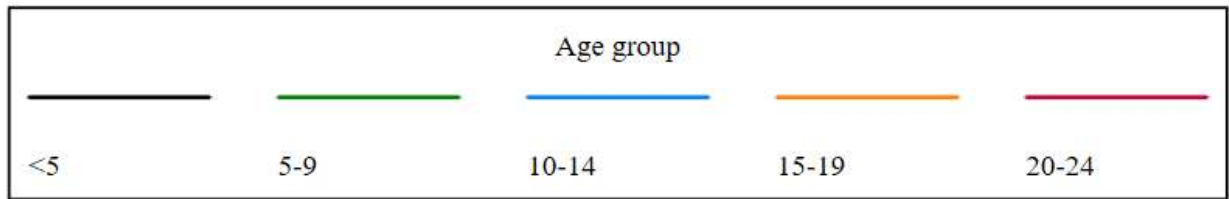

Enteric infections: Deaths/100,000 Uncertainty interval

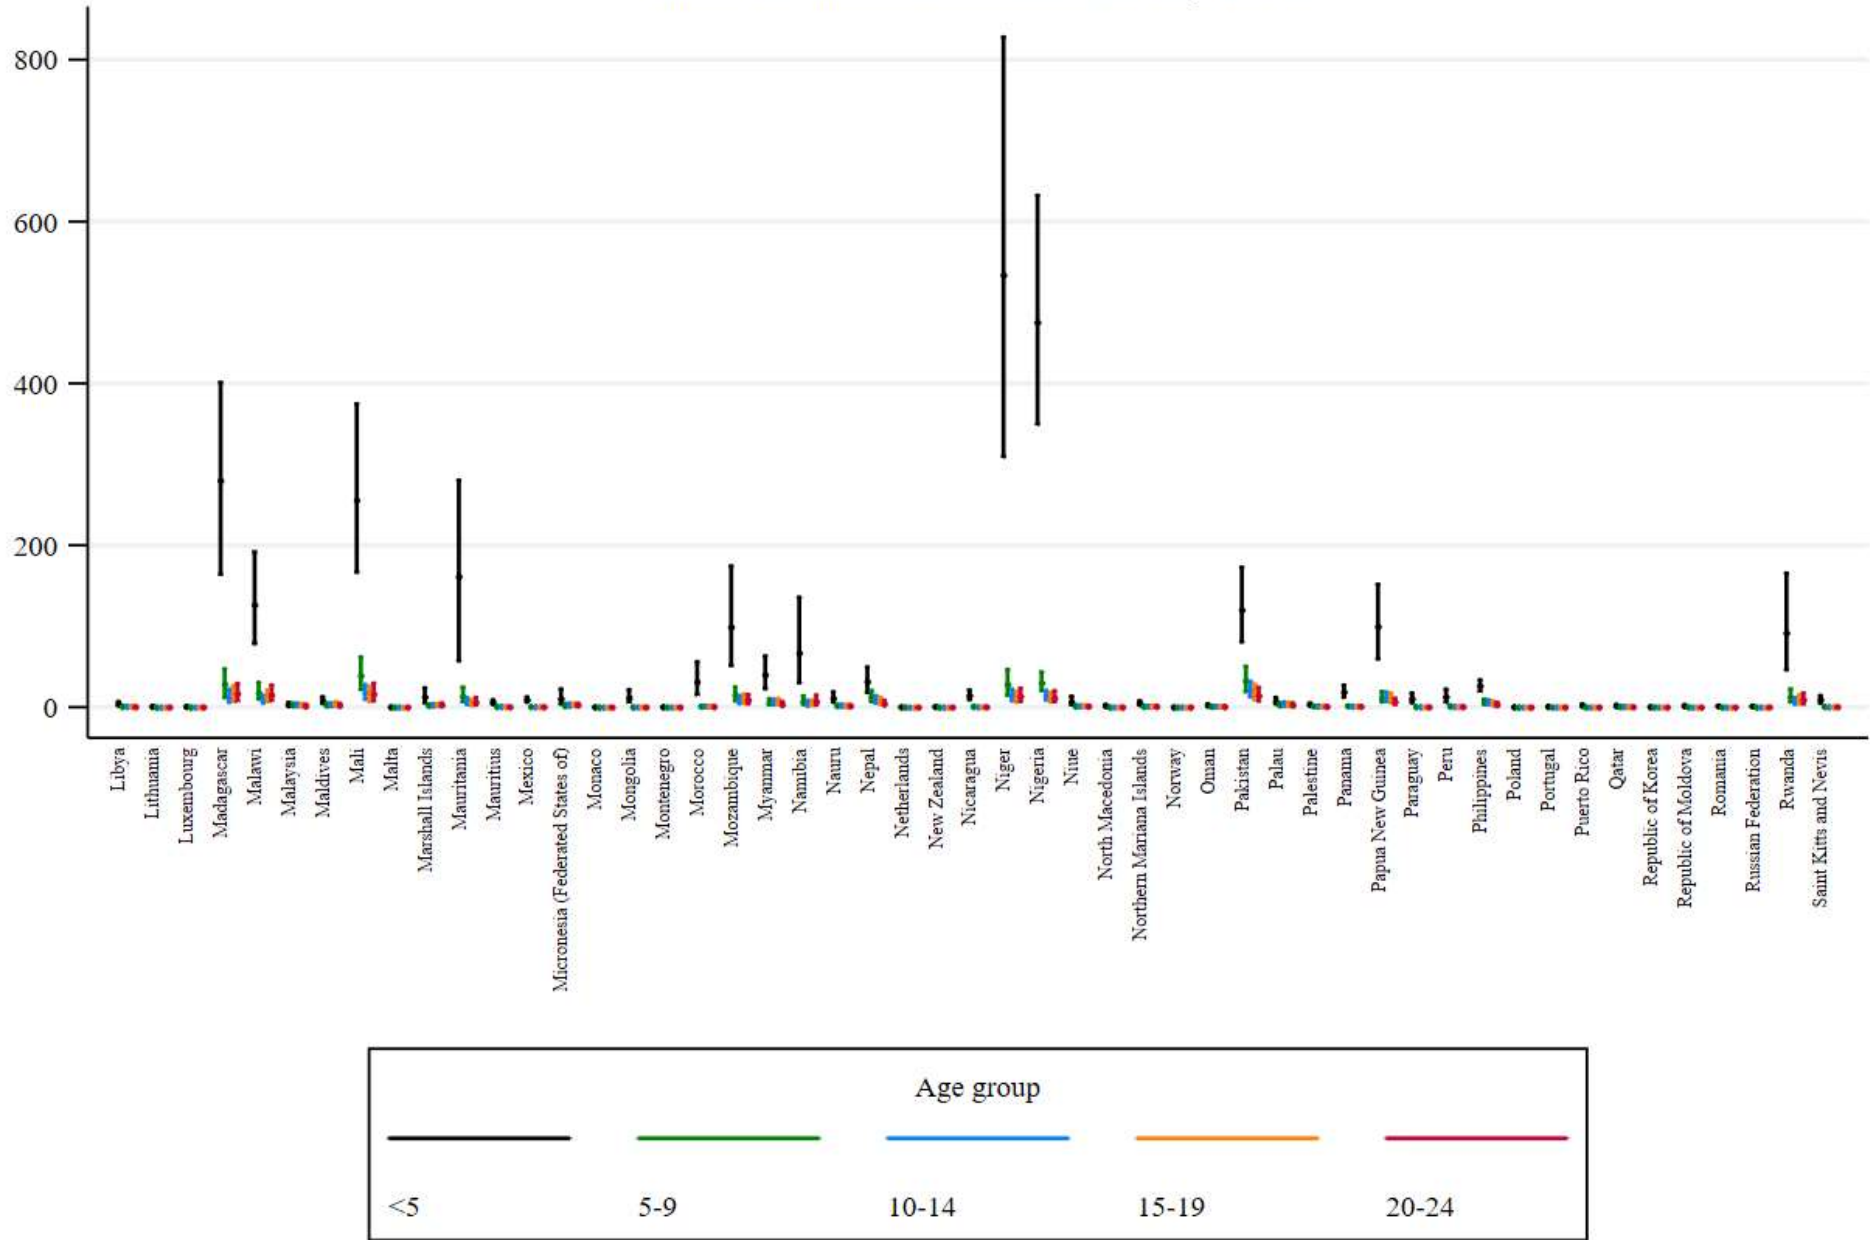

Enteric infections: Deaths/100,000 Uncertainty interval

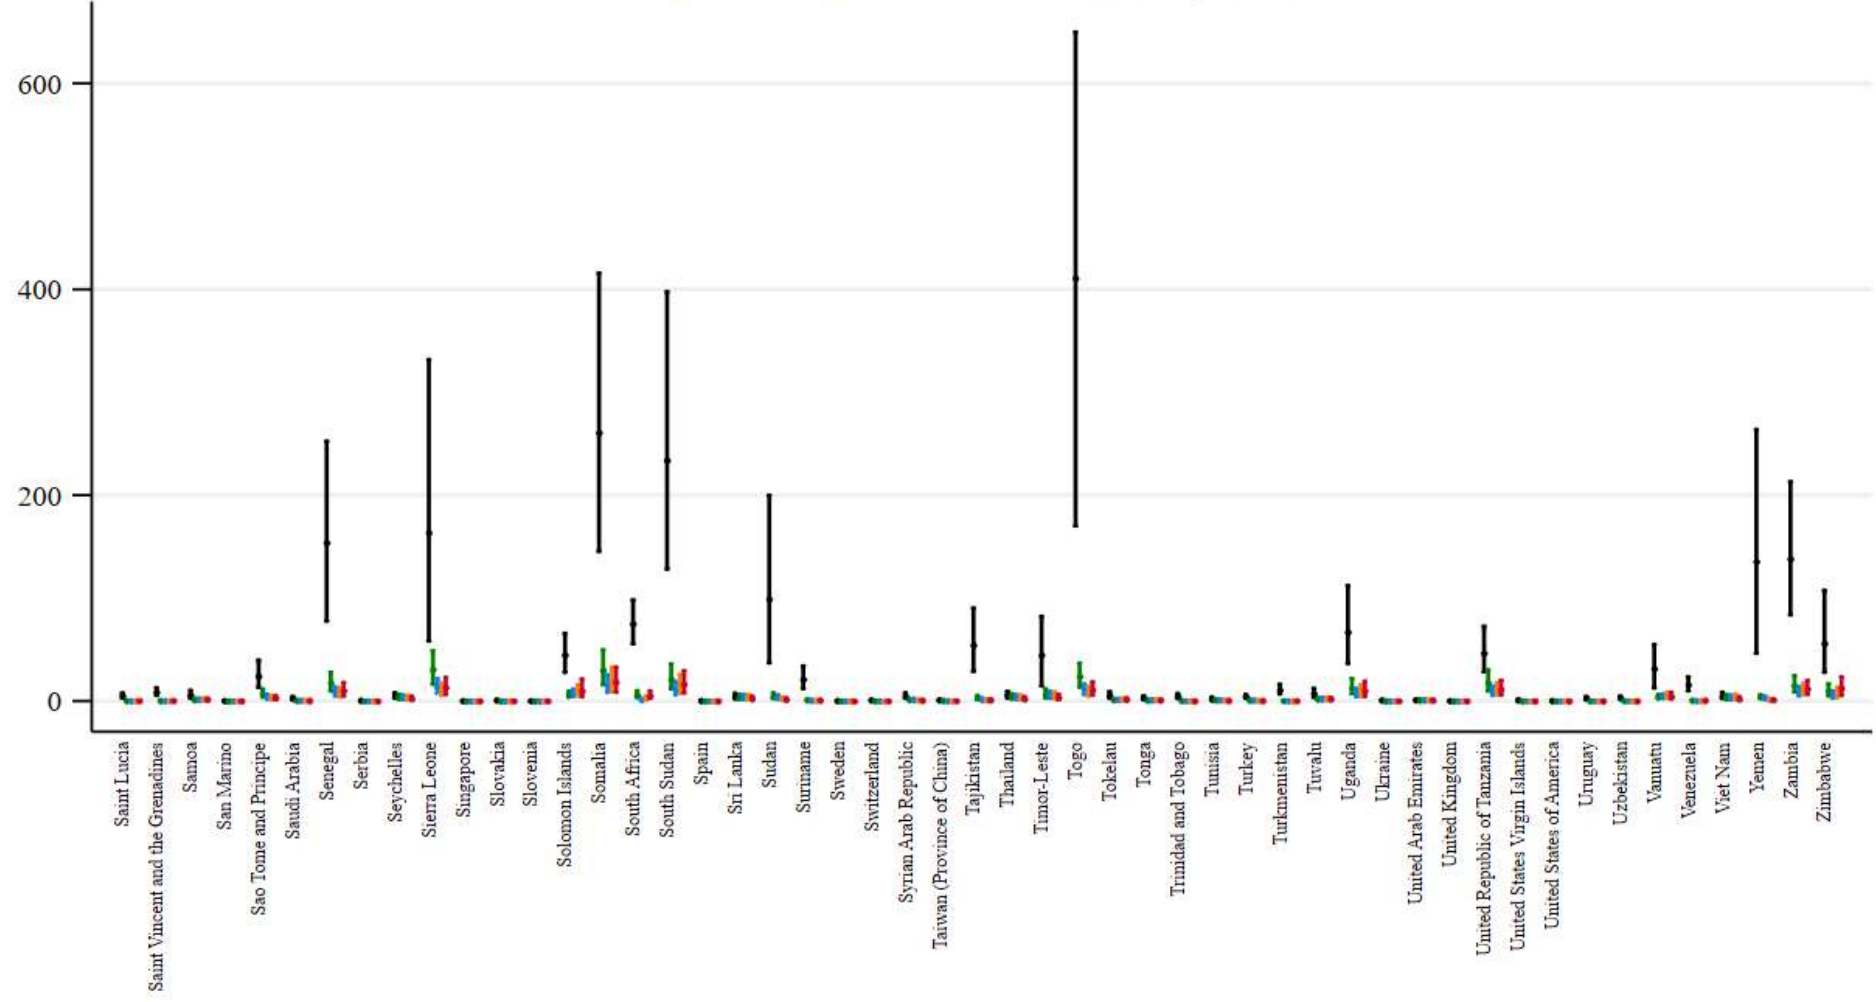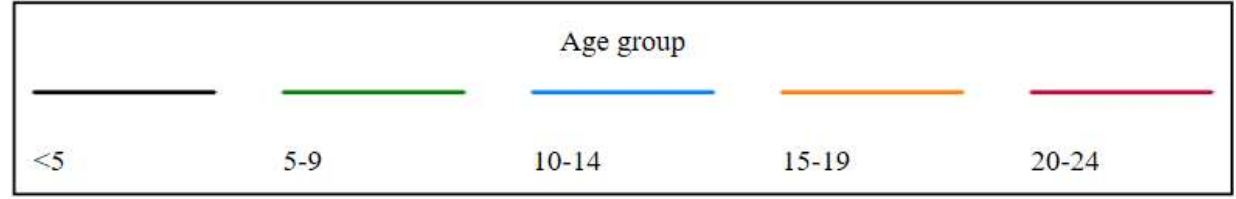

S20\_1 Part B: Enteric Infections DALYs/ 100 000 Uncertainty interval for each age group

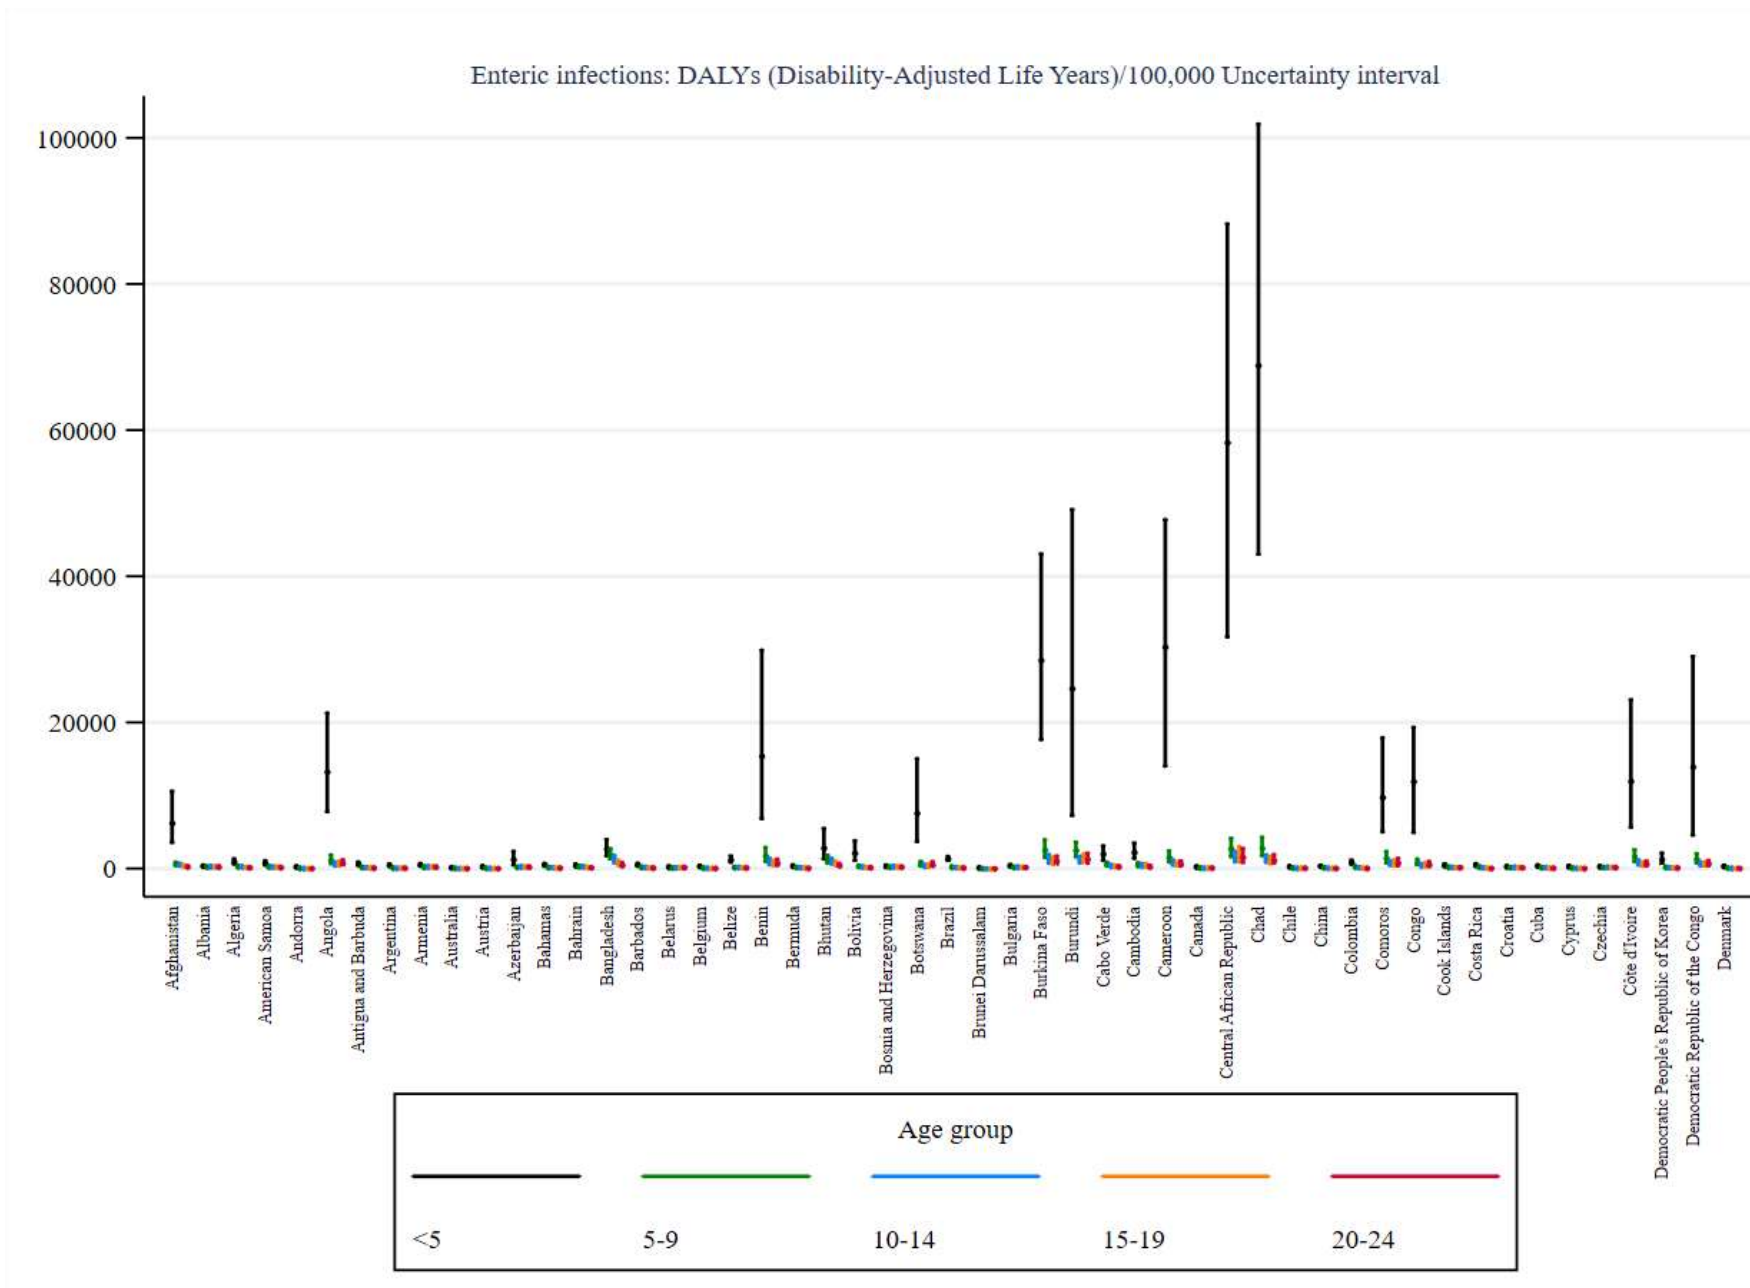

Enteric infections: DALYs (Disability-Adjusted Life Years)/100,000 Uncertainty interval

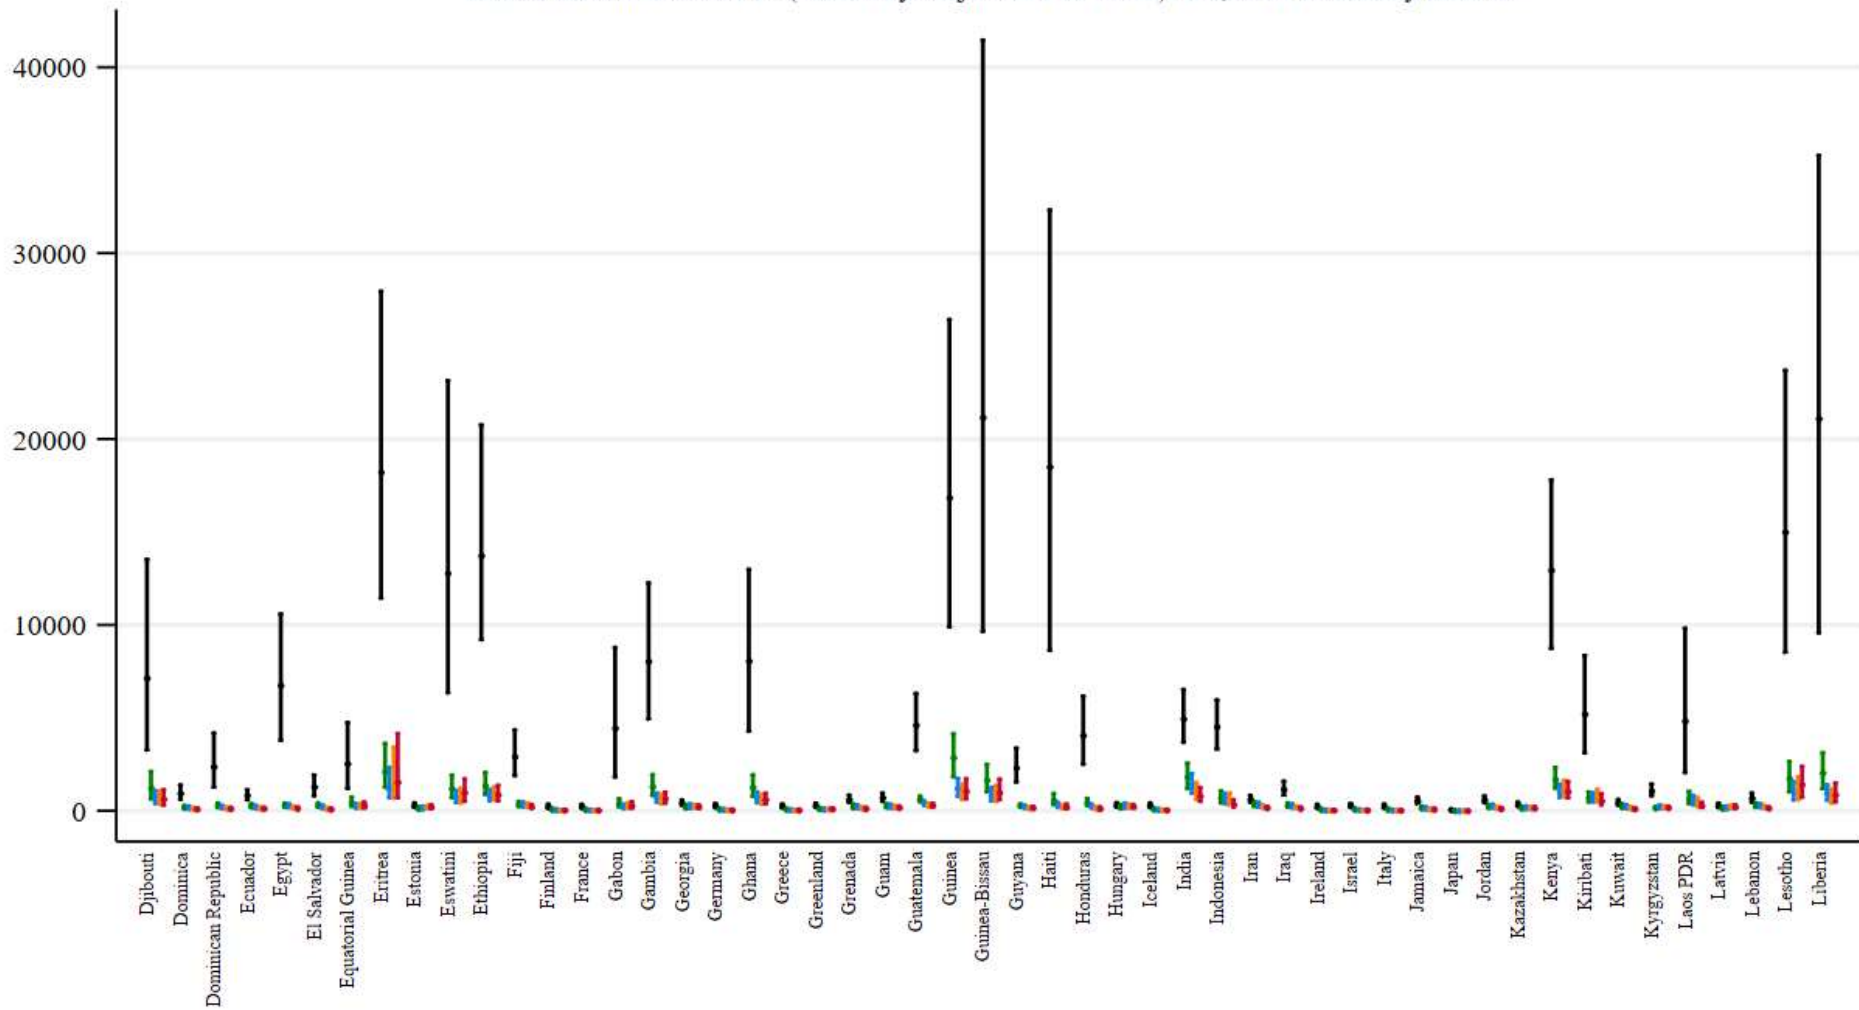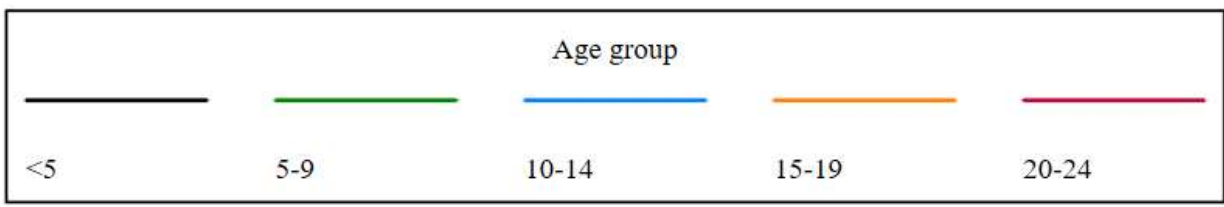



Enteric infections: DALYs (Disability-Adjusted Life Years)/100,000 Uncertainty interval

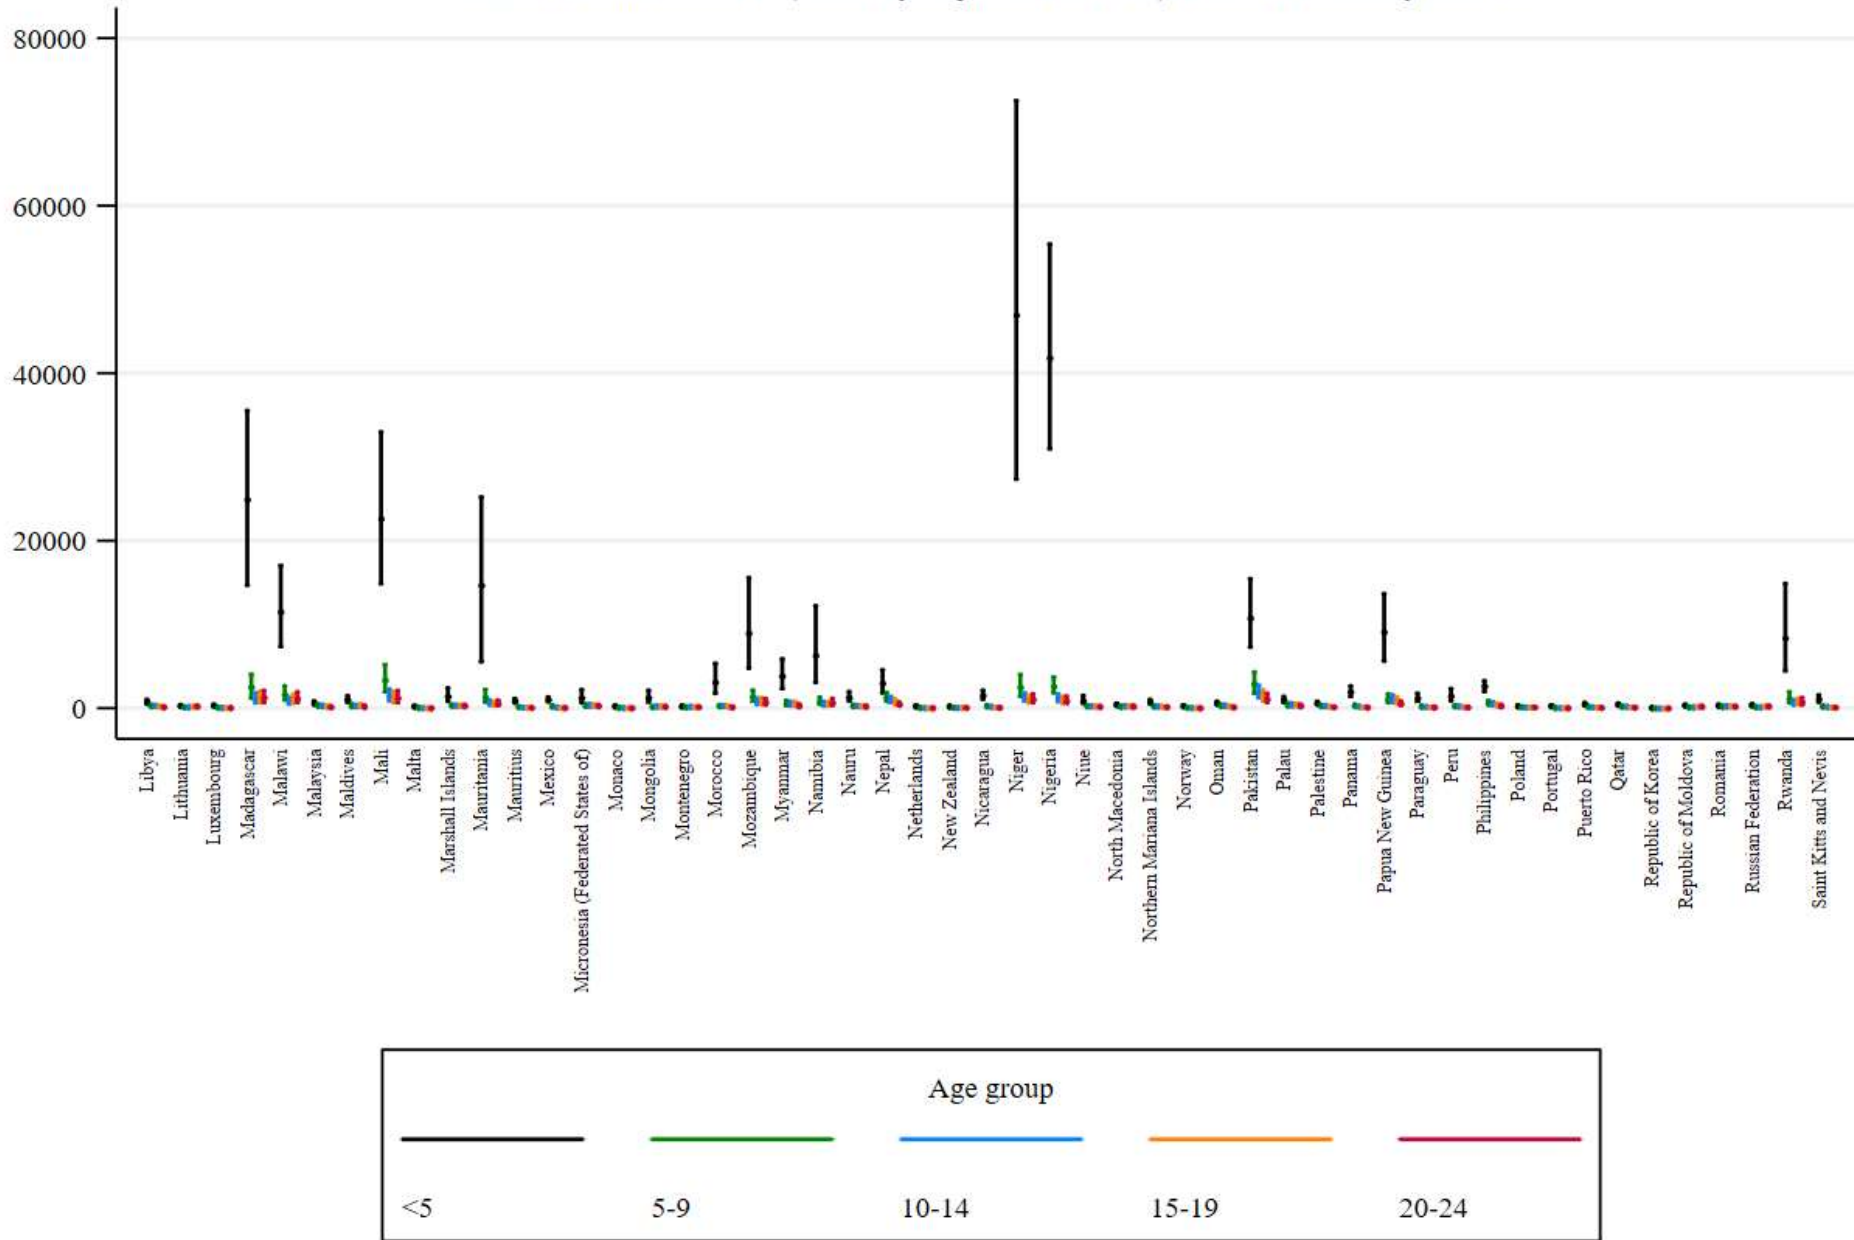

Enteric infections: DALYs (Disability-Adjusted Life Years)/100,000 Uncertainty interval

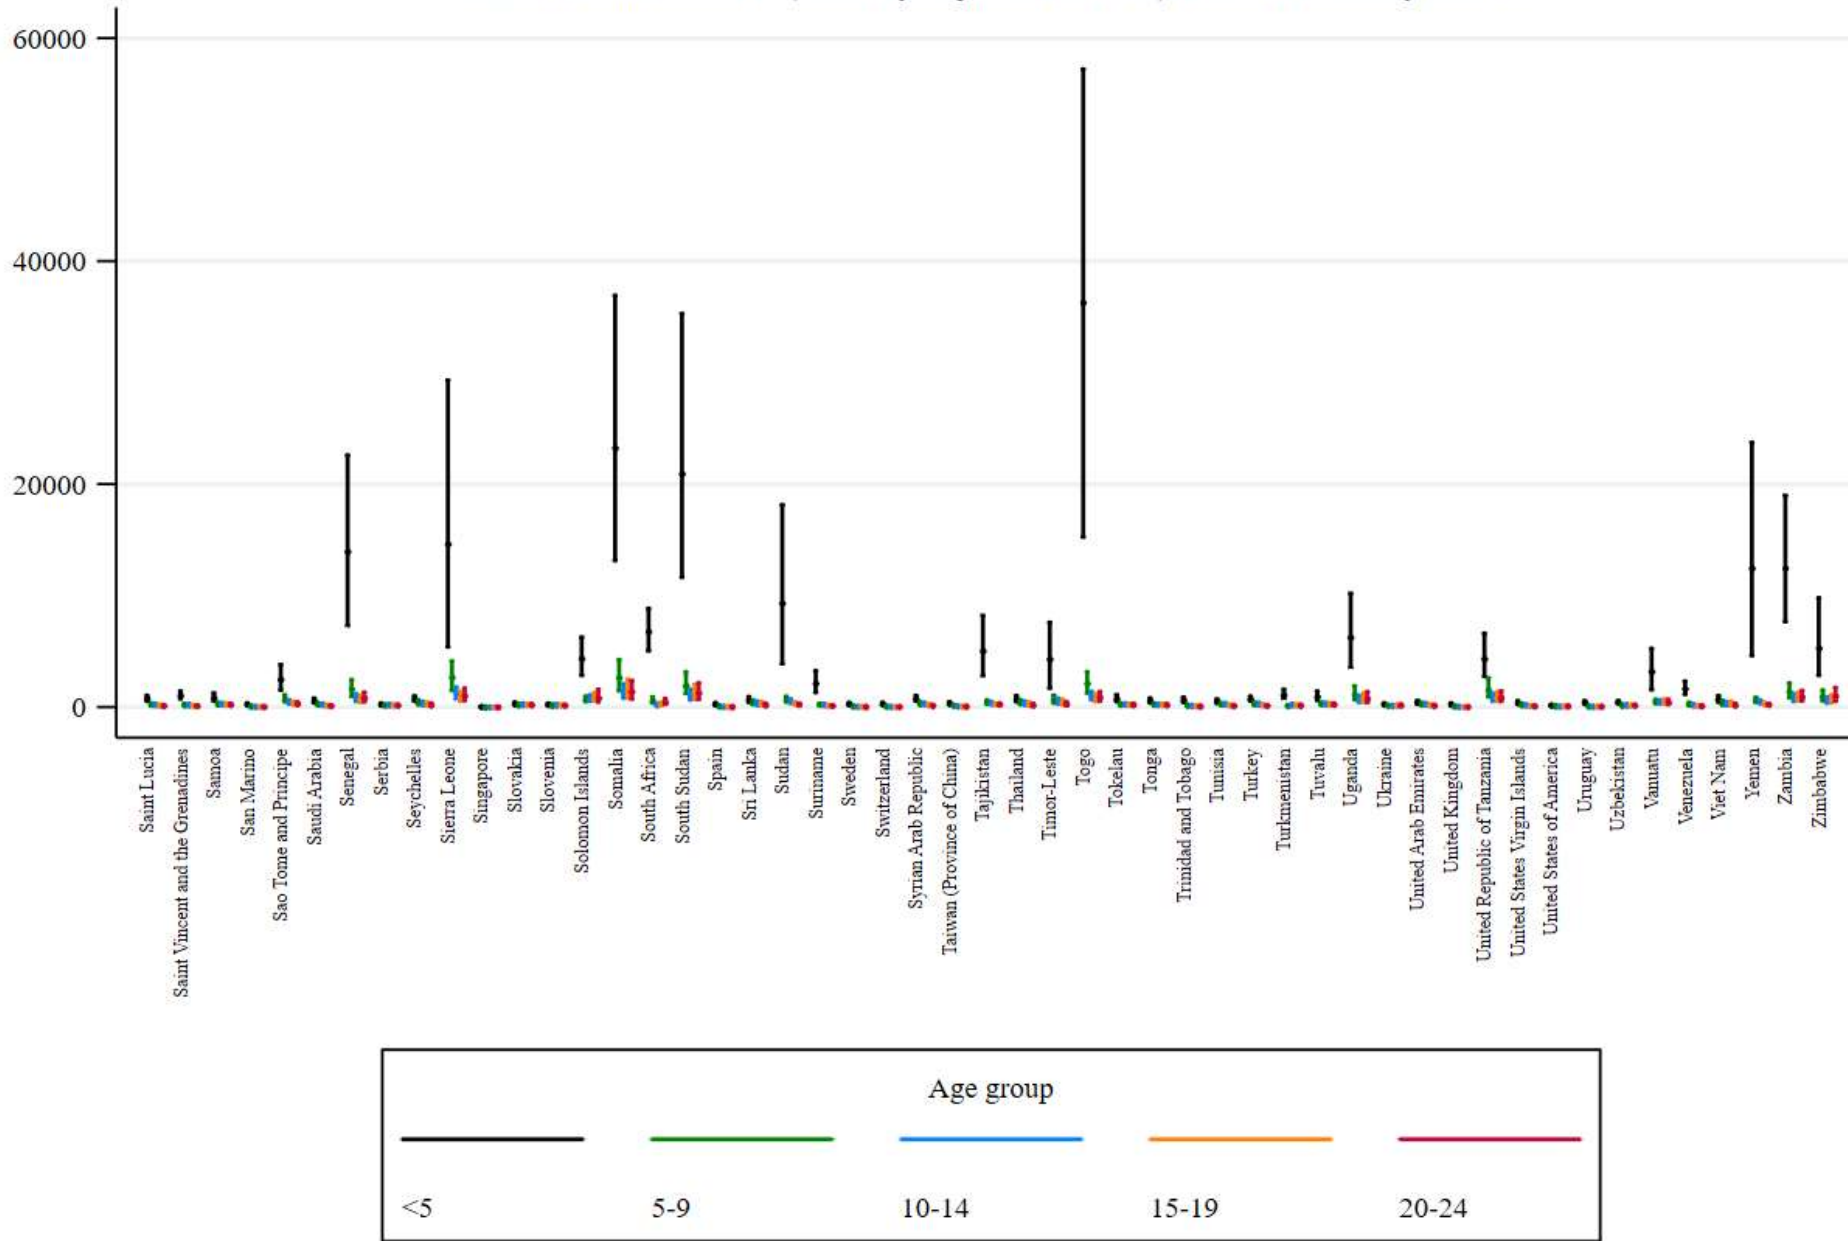

S20\_2 Part A: HIV Deaths/ 100 000 Uncertainty interval for each age group

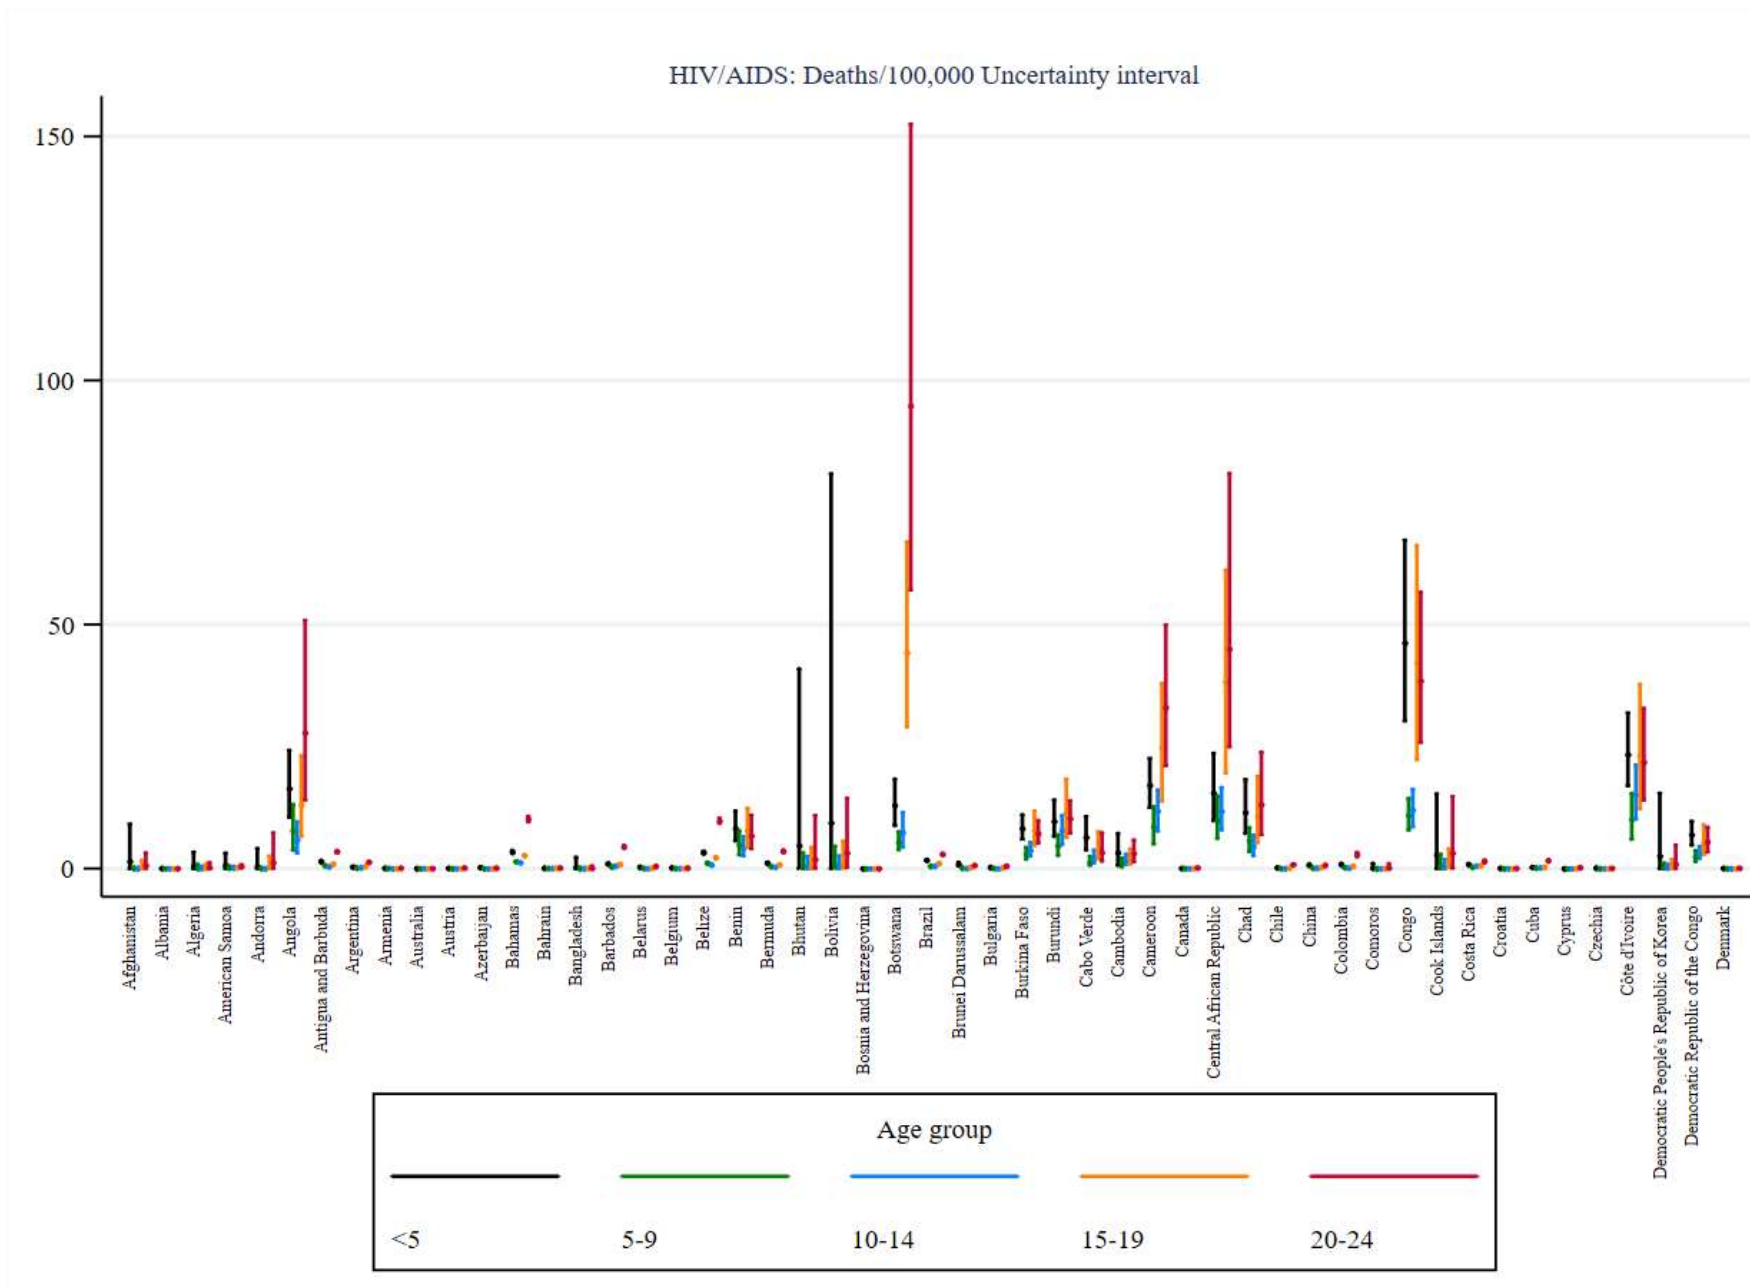

HIV/AIDS: Deaths/100,000 Uncertainty interval

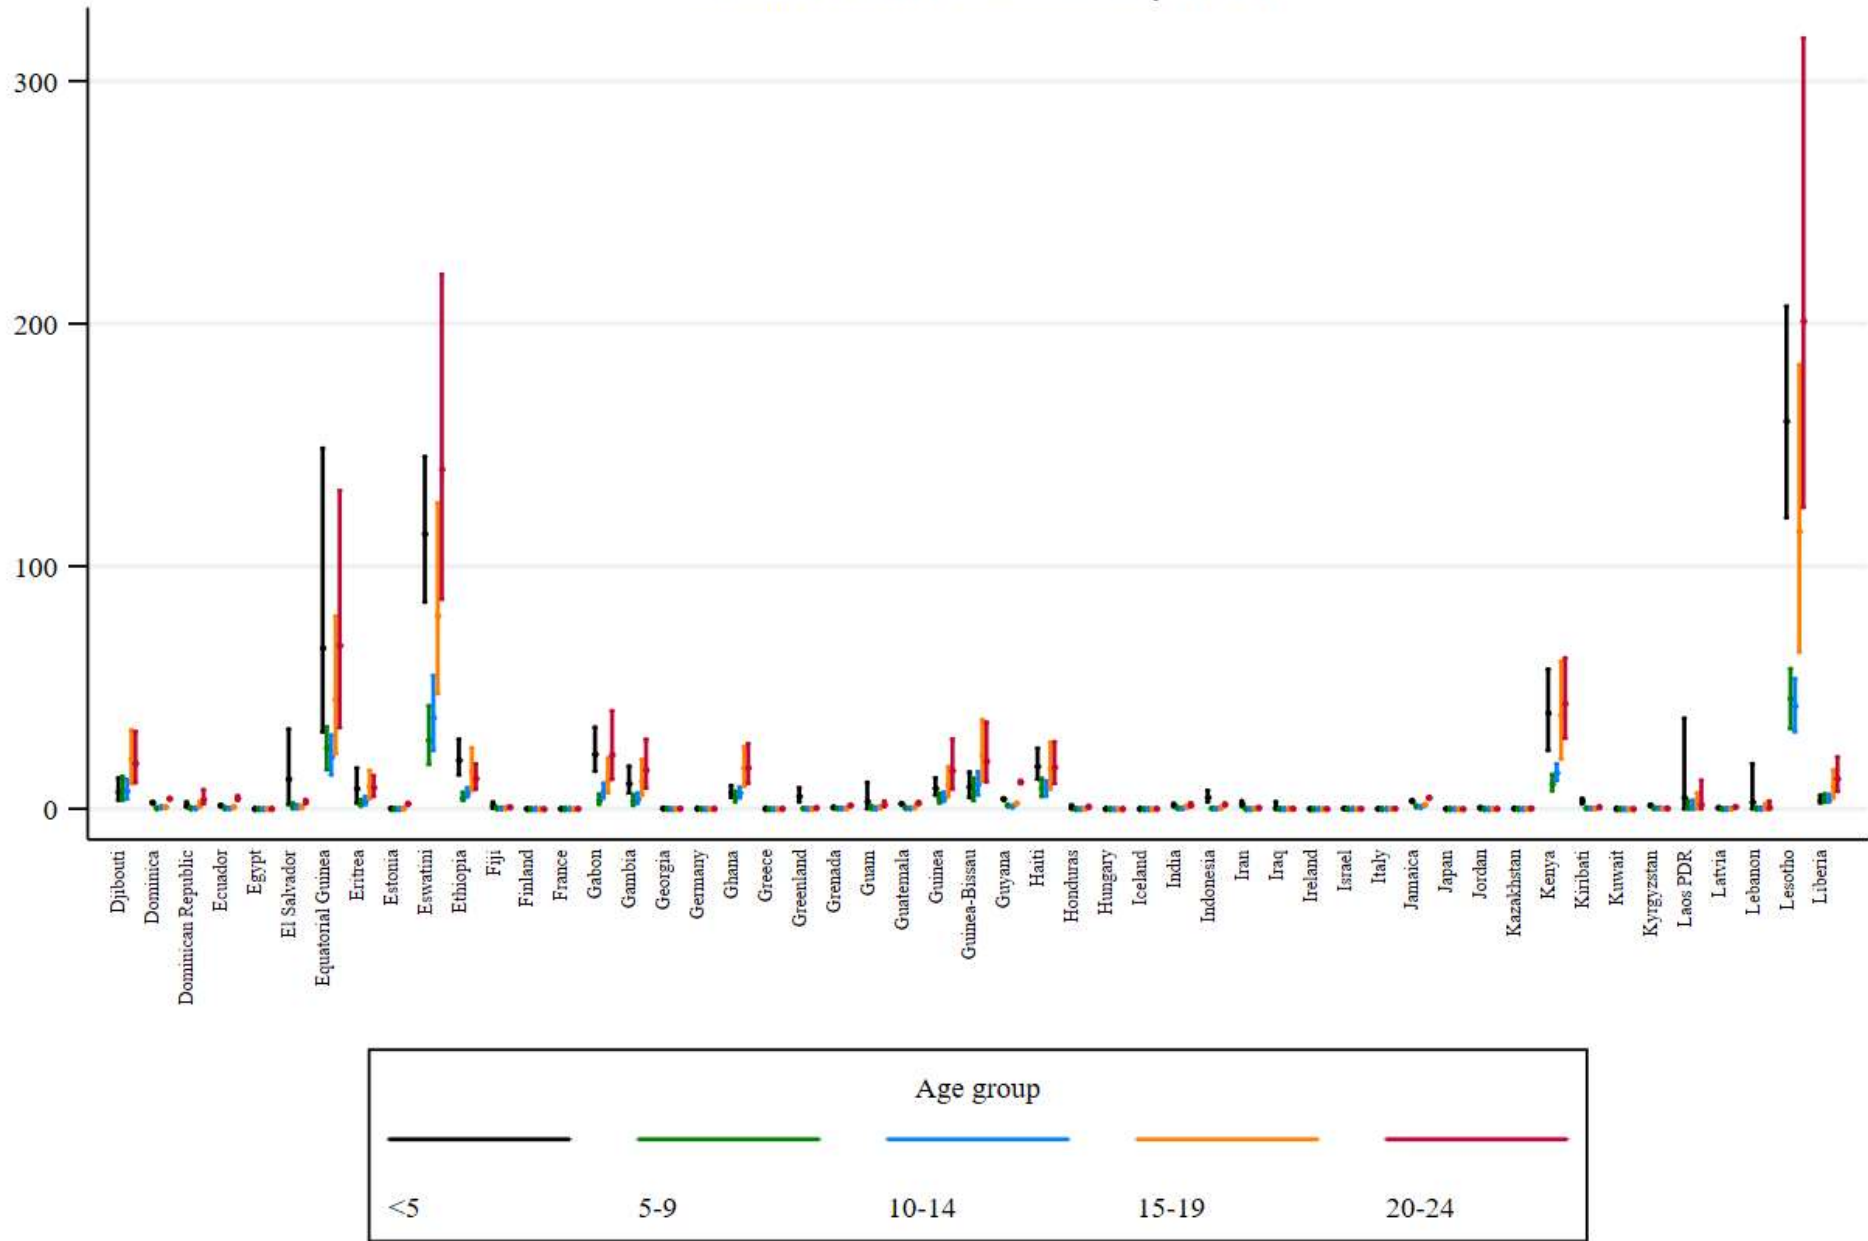

HIV/AIDS: Deaths/100,000 Uncertainty interval

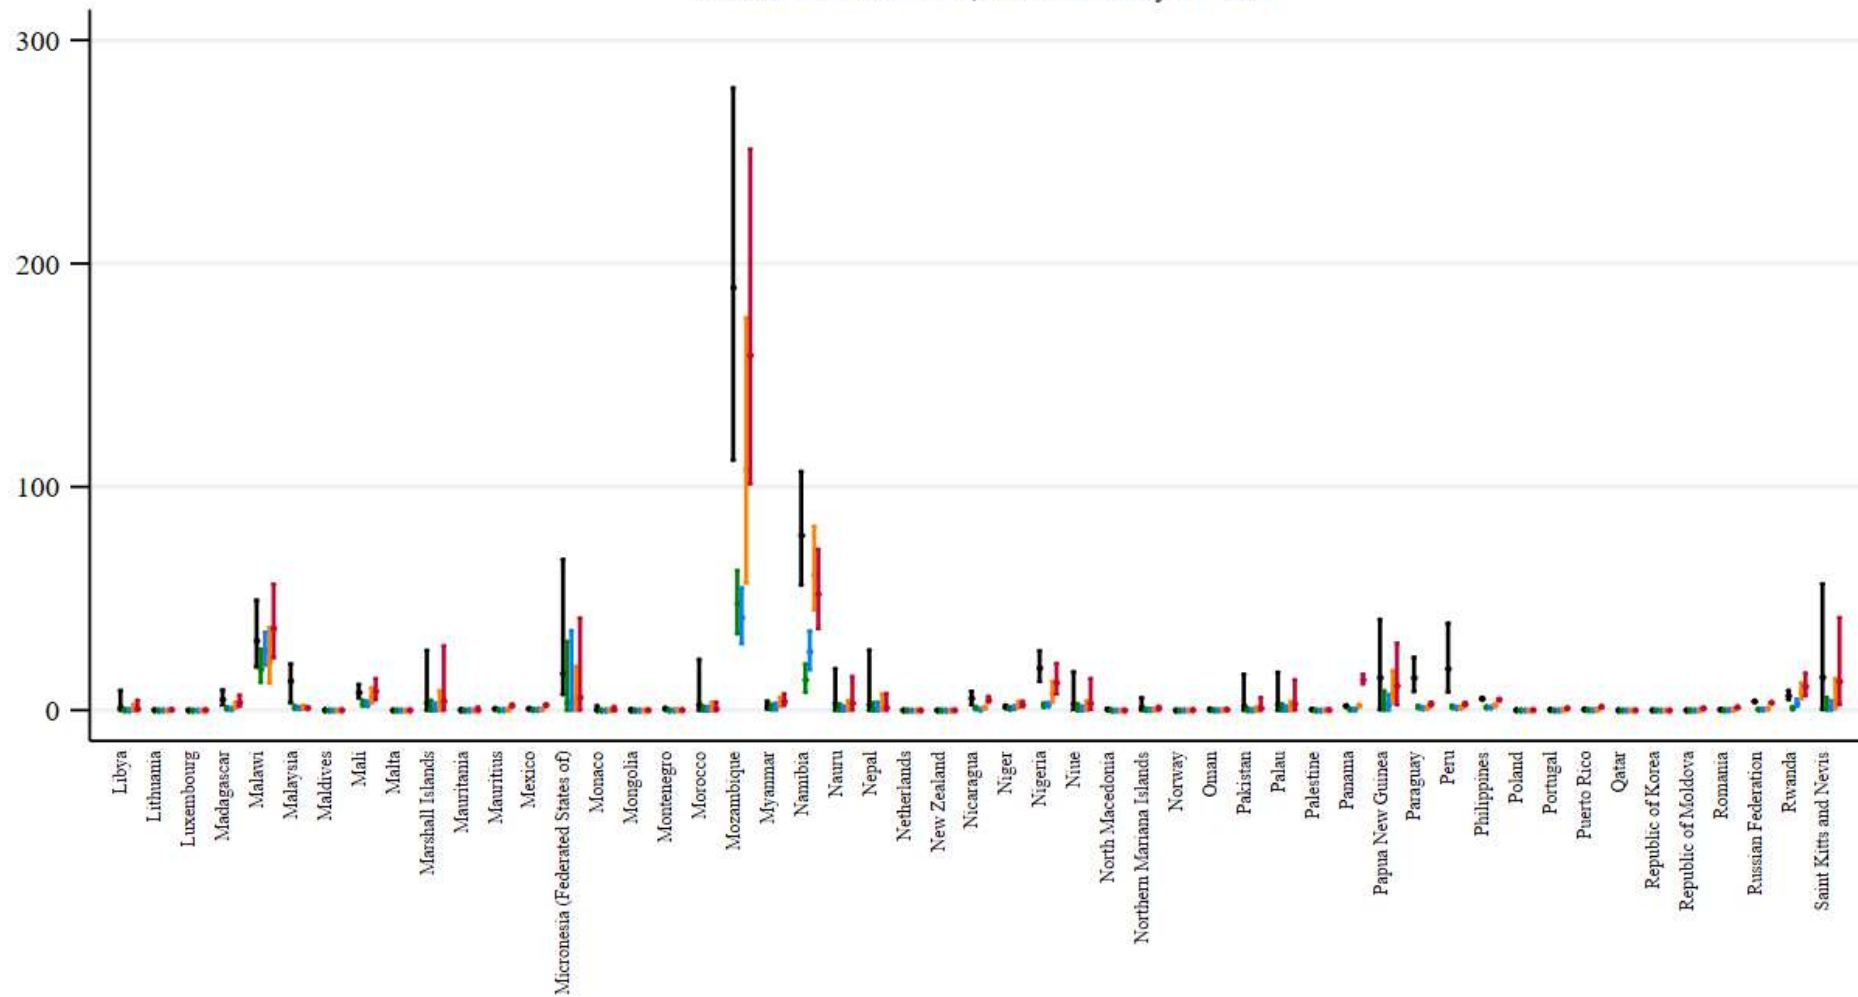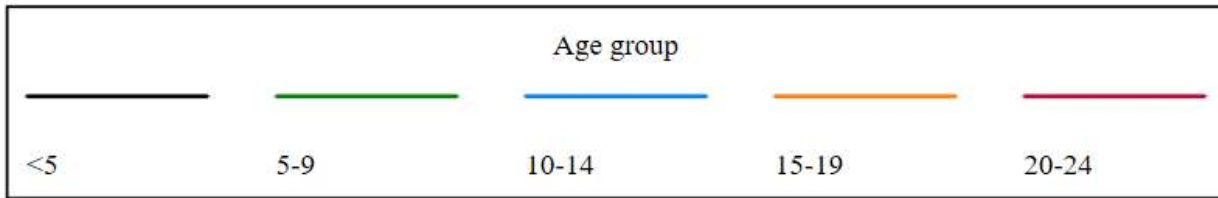

HIV/AIDS: Deaths/100,000 Uncertainty interval

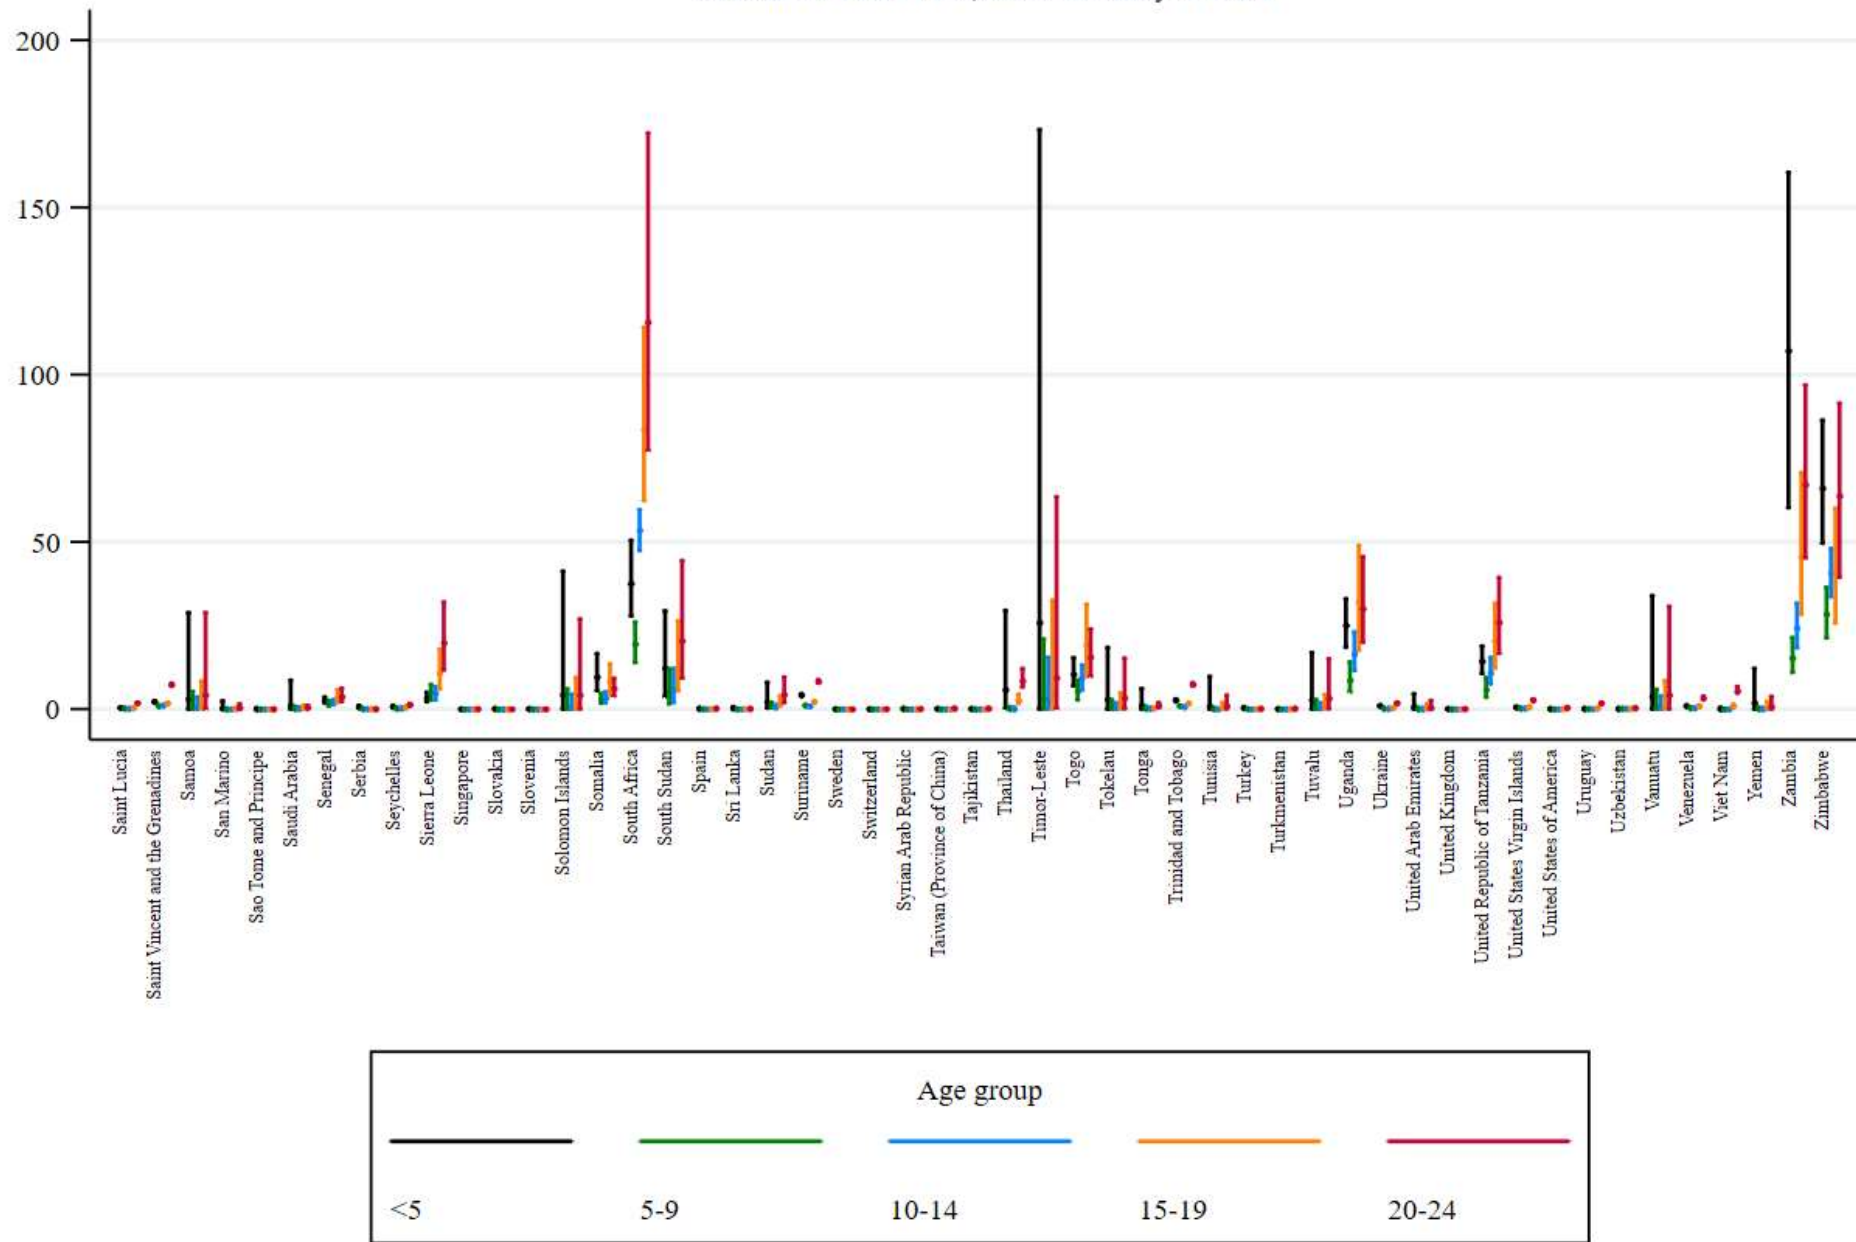

S20\_2 Part B: HIV DALYs/ 100 000 Uncertainty interval for each age group

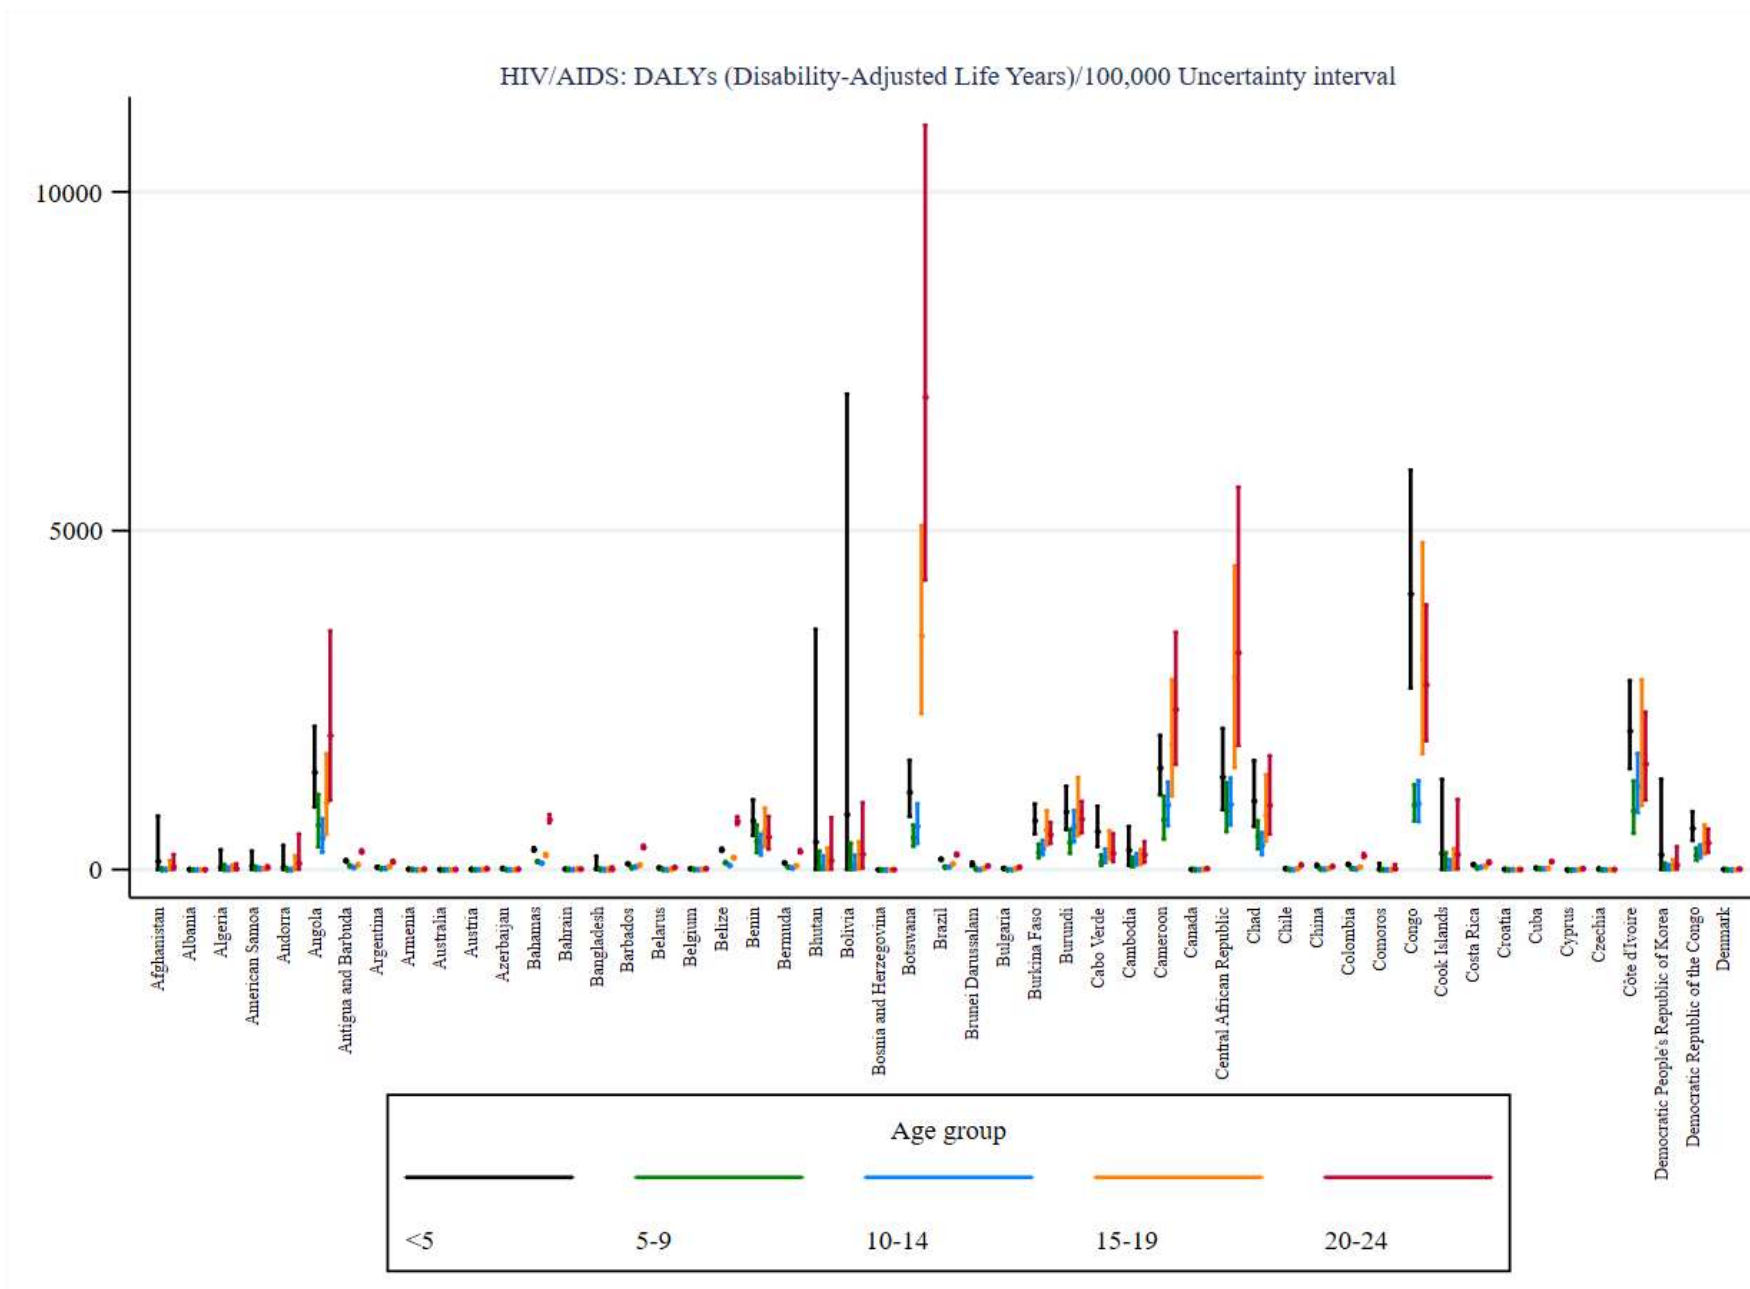

HIV/AIDS: DALYs (Disability-Adjusted Life Years)/100,000 Uncertainty interval

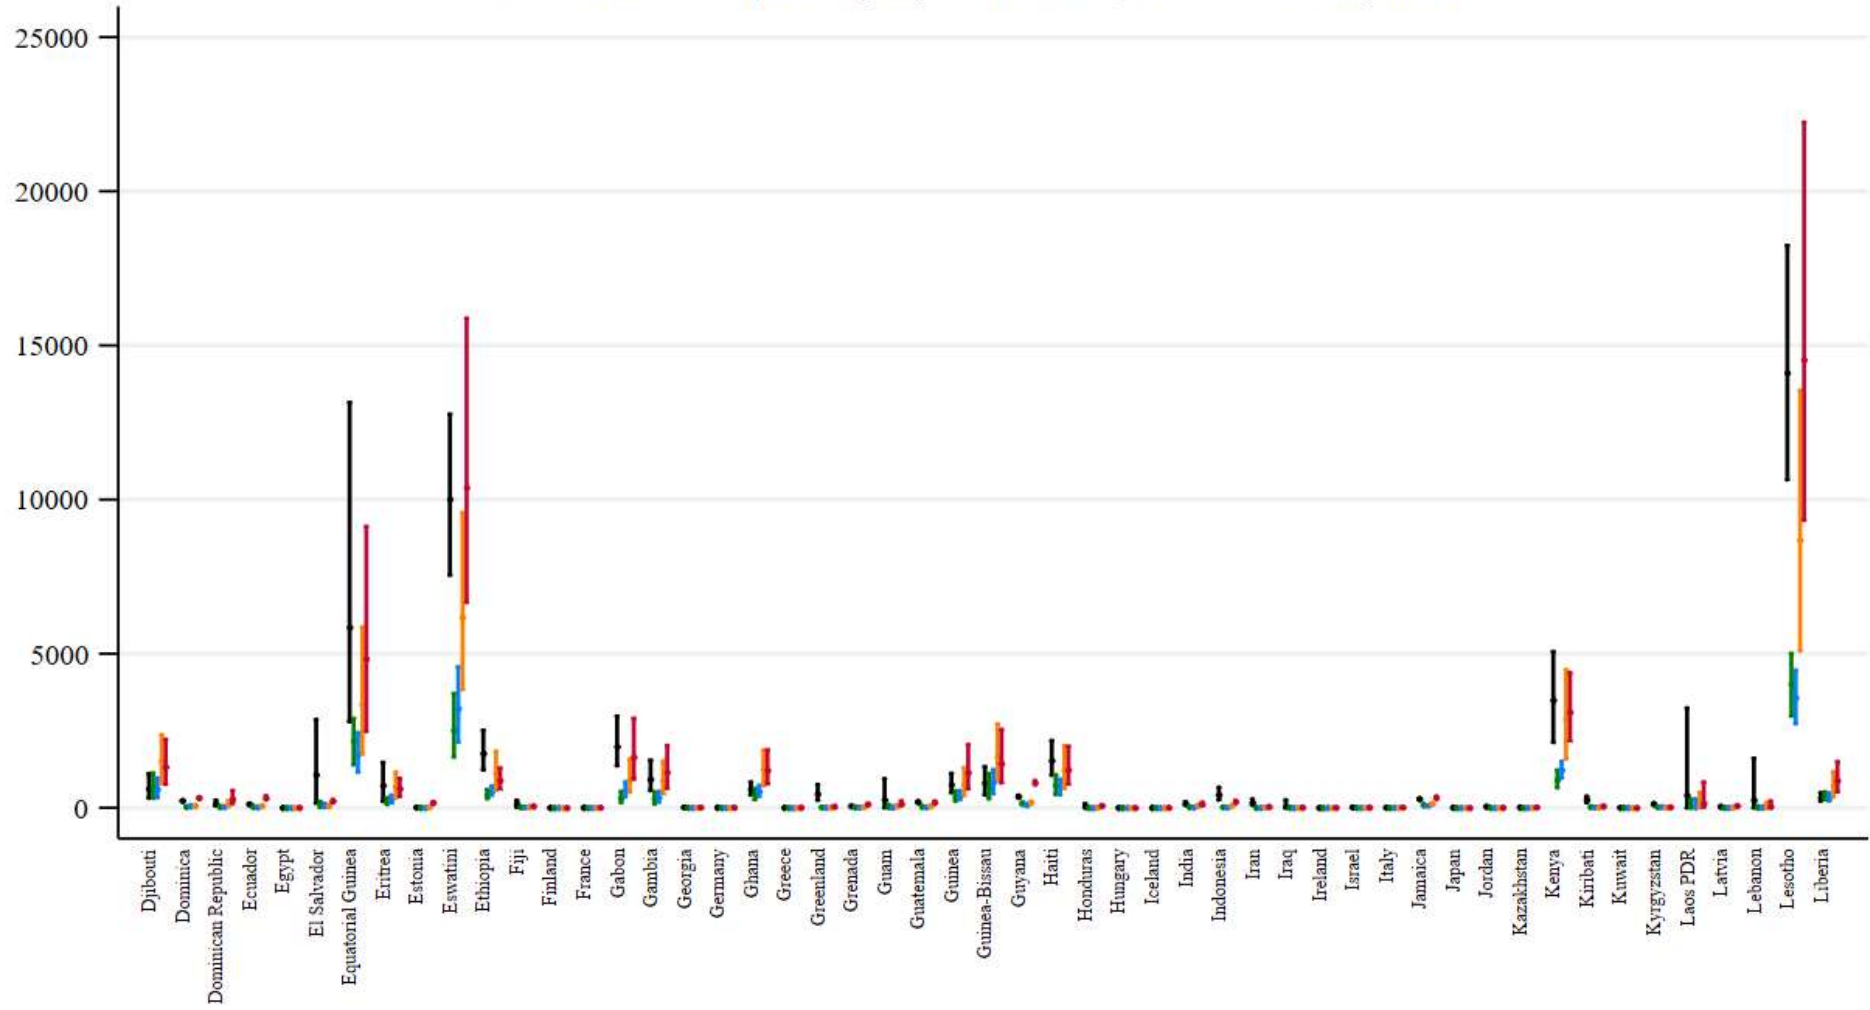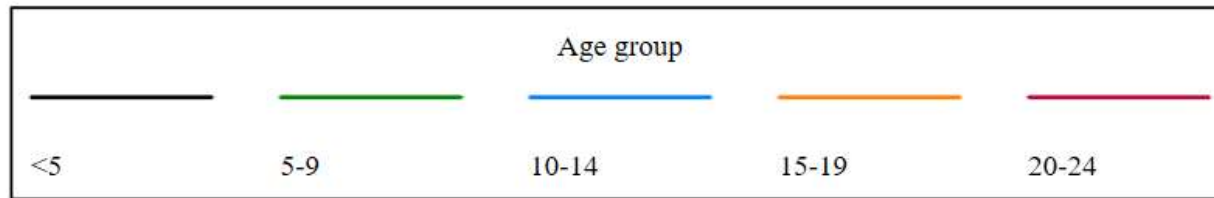



HIV/AIDS: DALYs (Disability-Adjusted Life Years)/100,000 Uncertainty interval

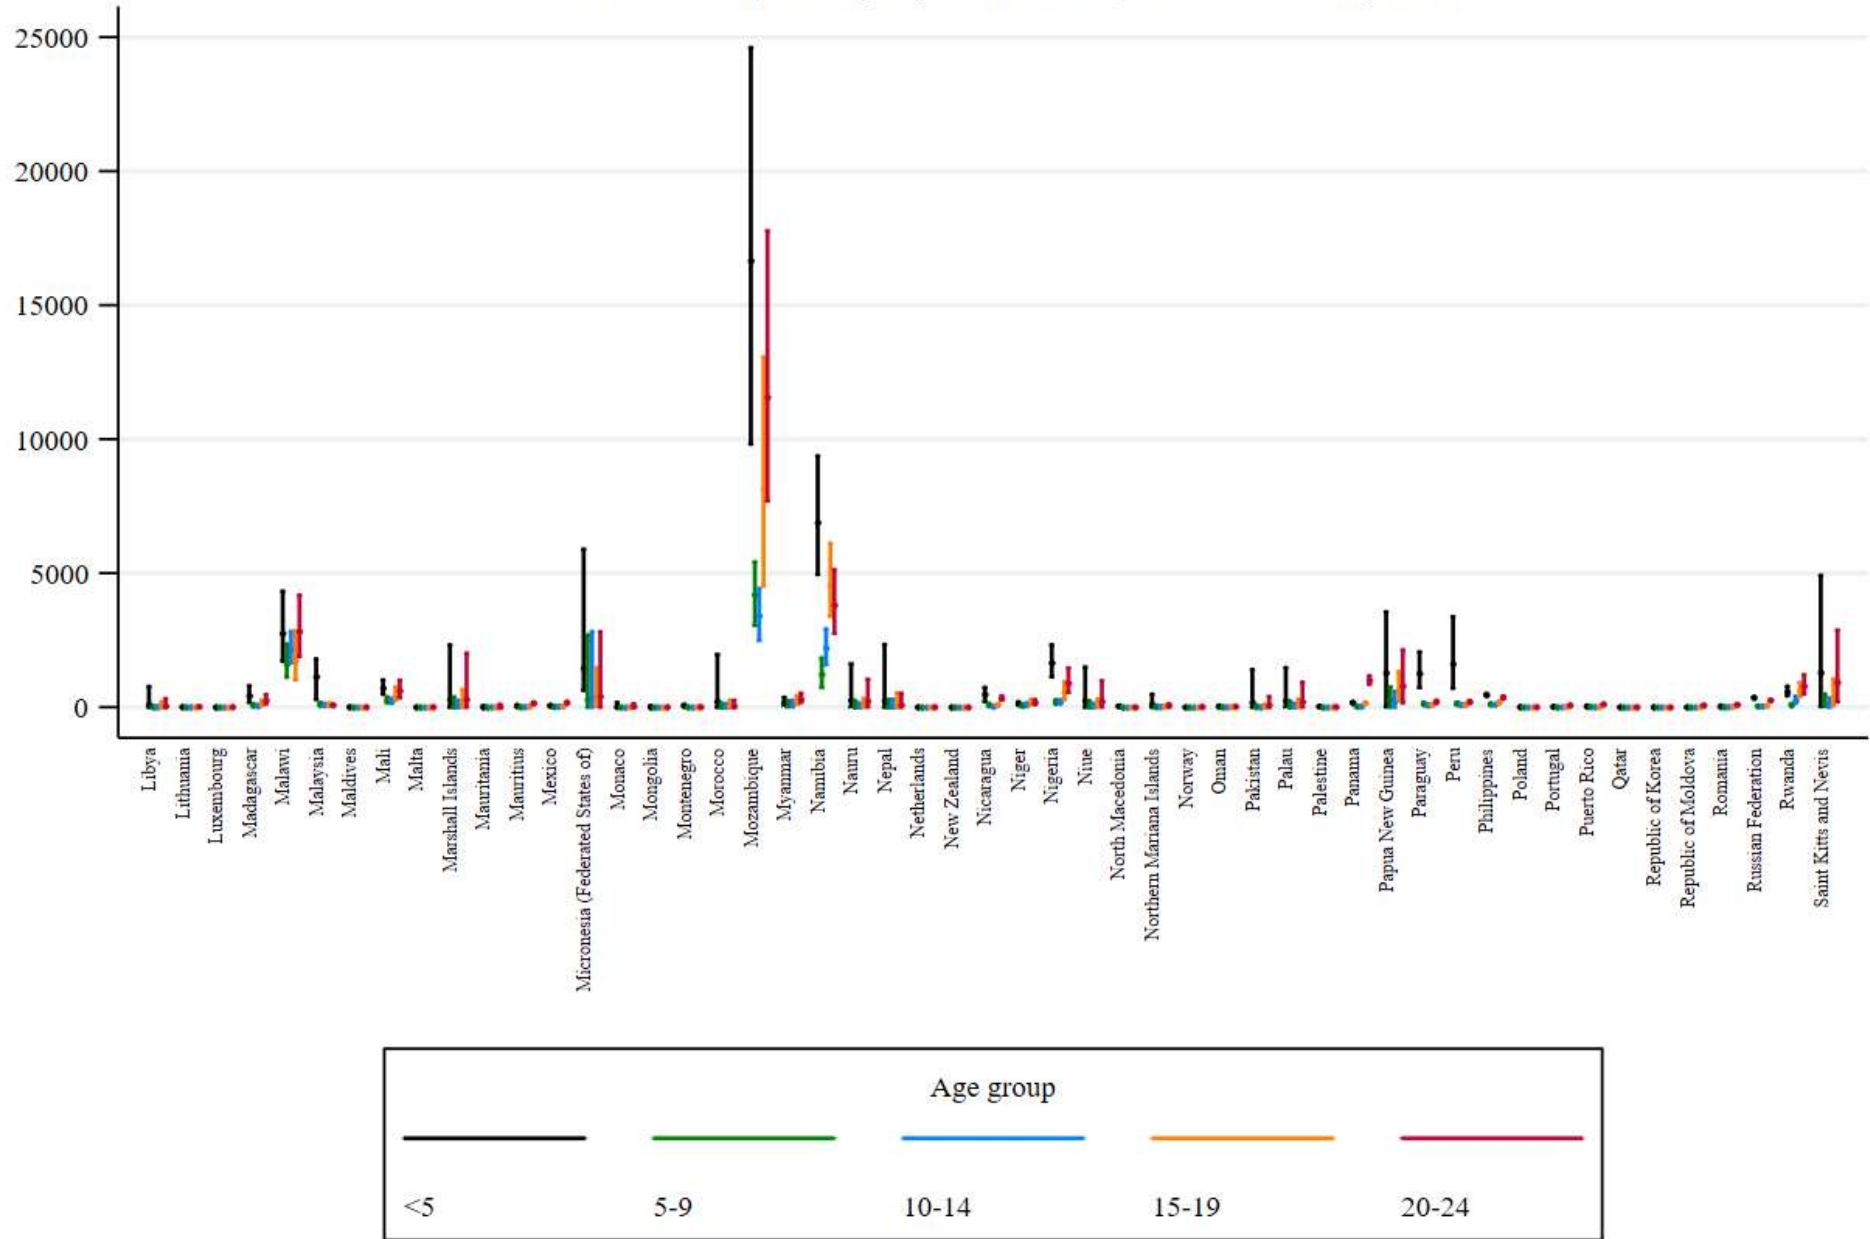

HIV/AIDS: DALYs (Disability-Adjusted Life Years)/100,000 Uncertainty interval

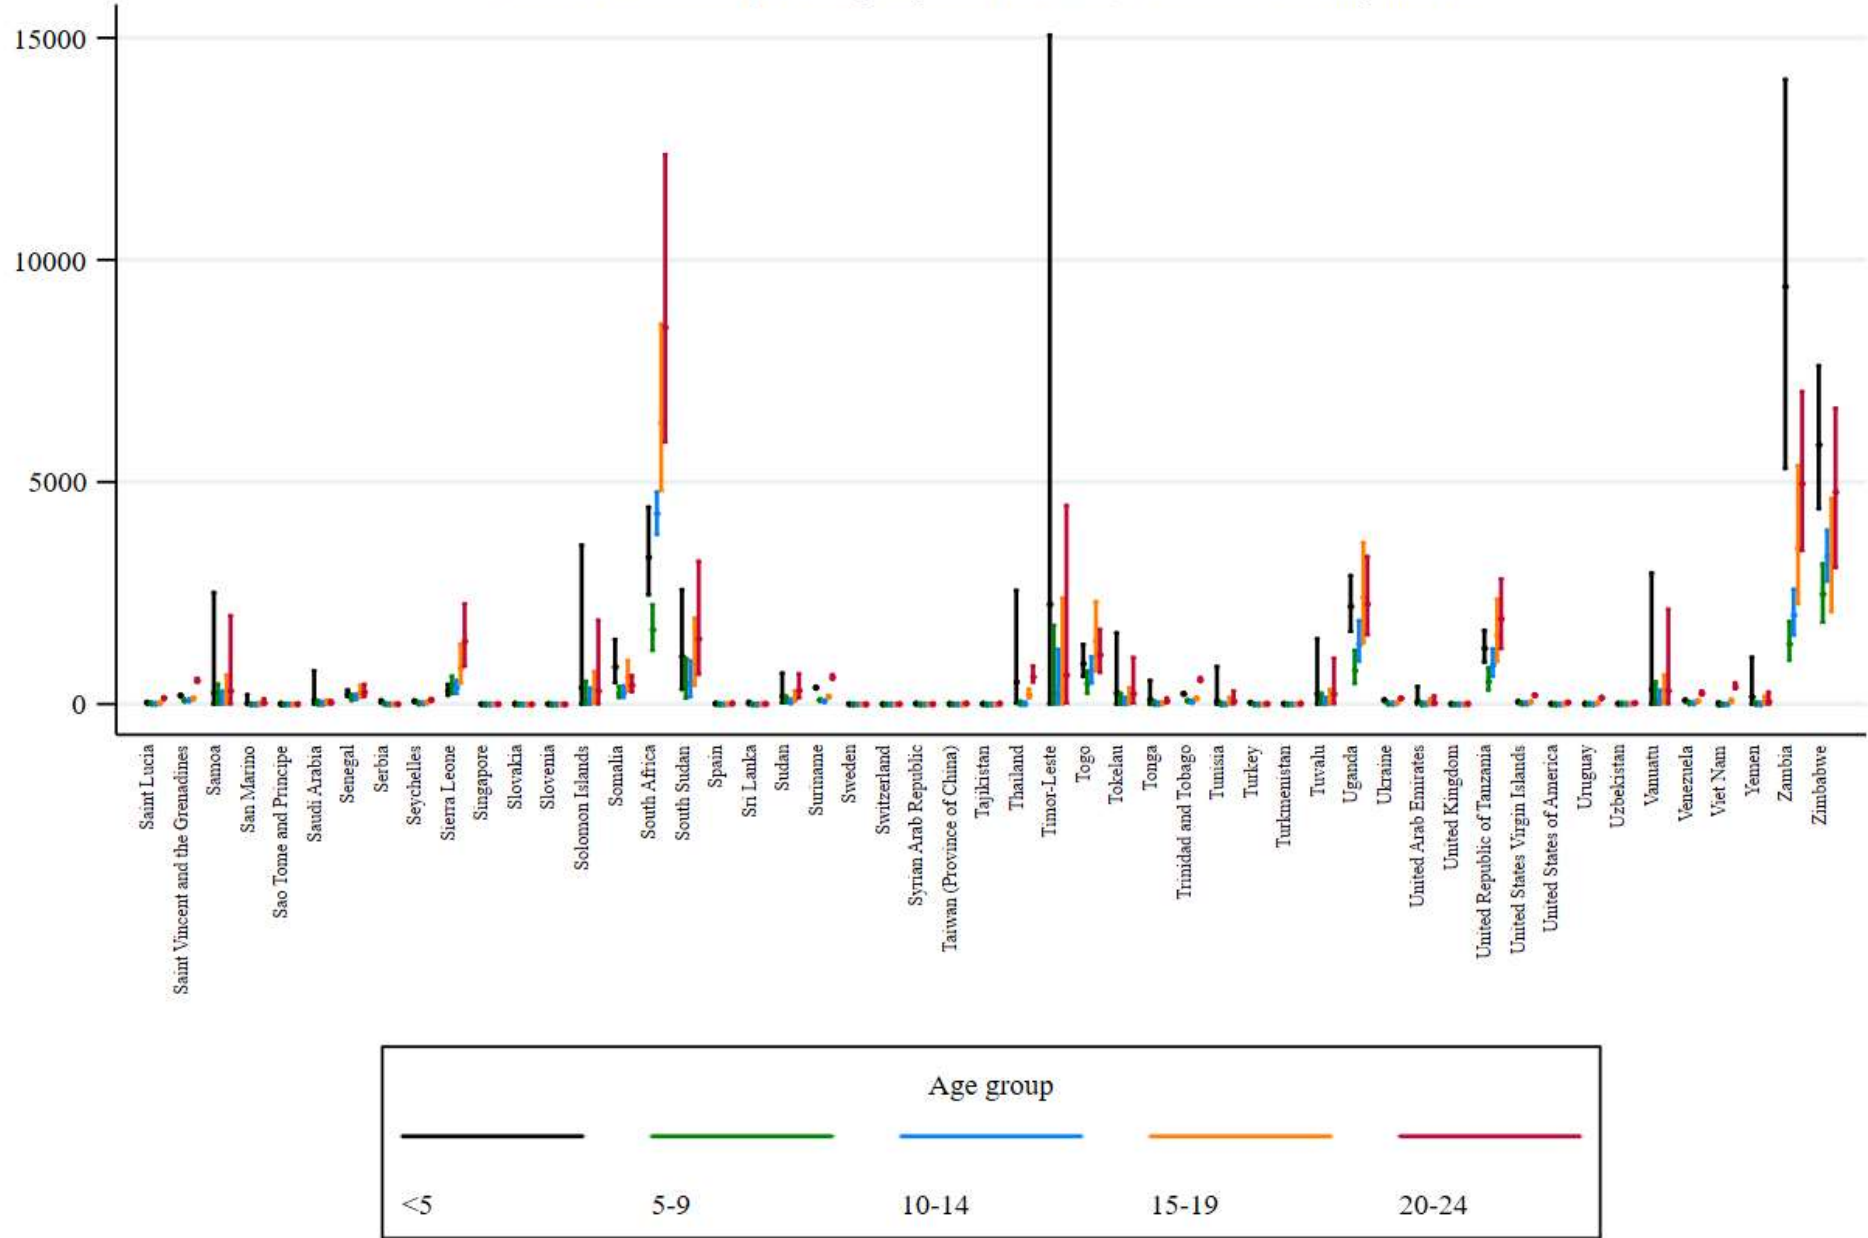

S20\_3 Part A: Lower respiratory infections Death/ 100 000 Uncertainty interval for each age group

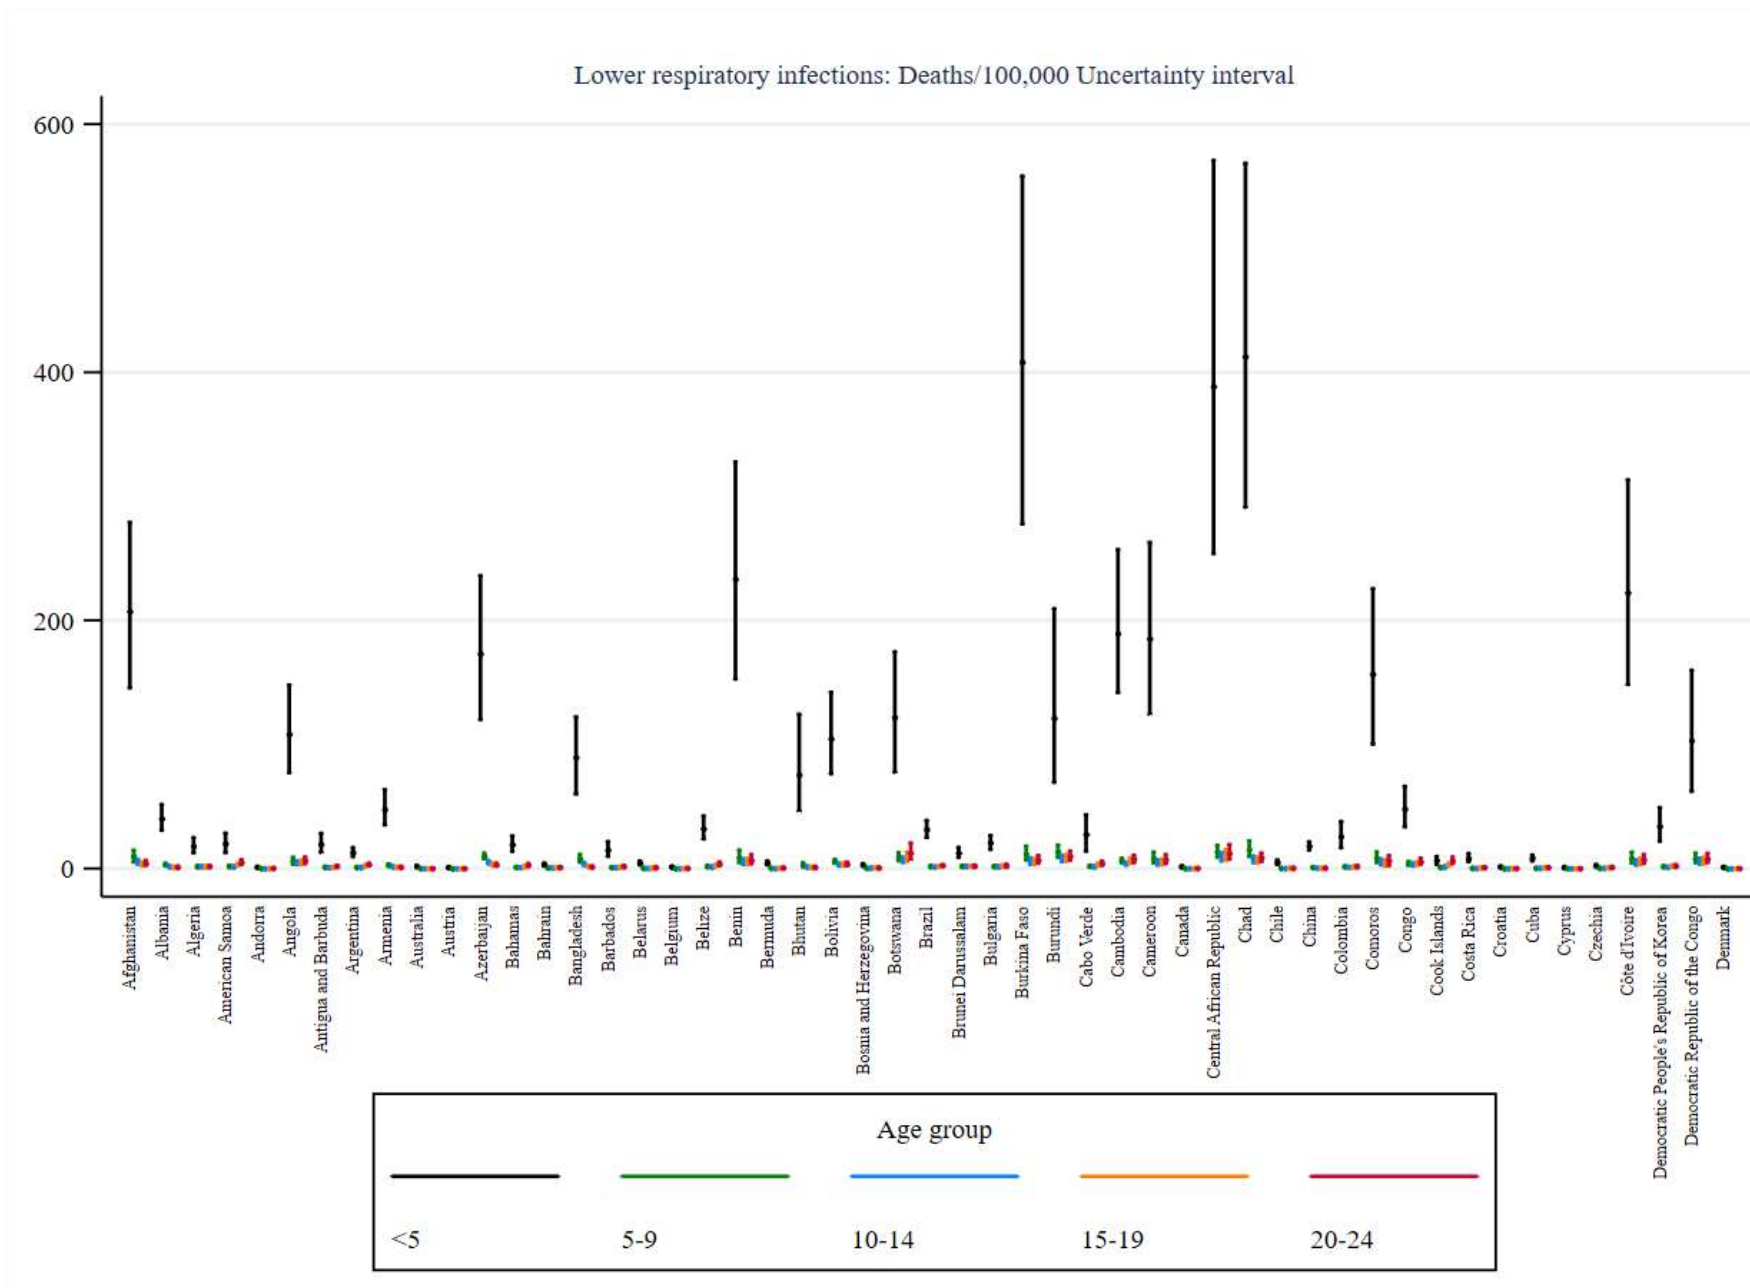

Lower respiratory infections: Deaths/100,000 Uncertainty interval

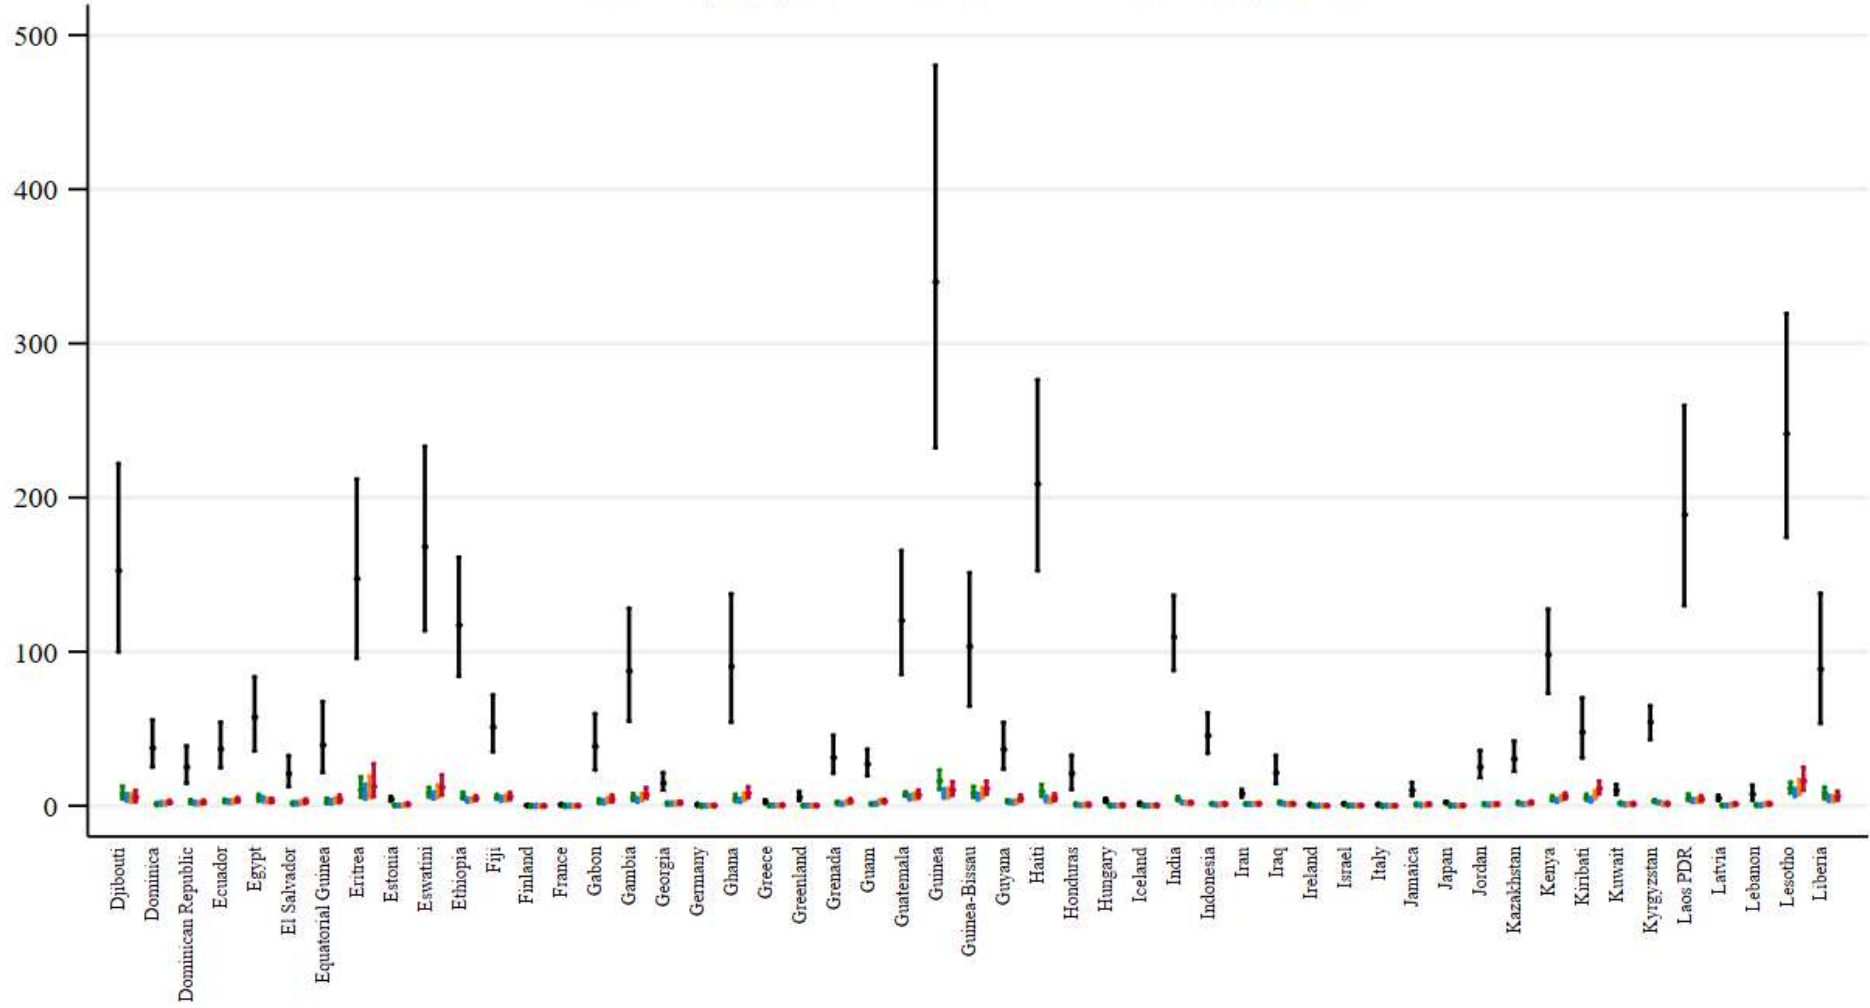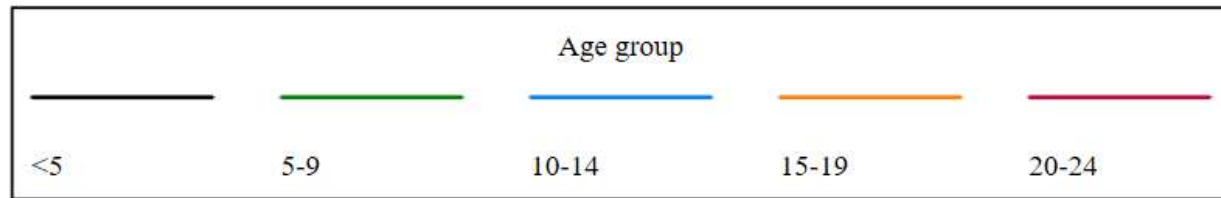

Lower respiratory infections: Deaths/100,000 Uncertainty interval

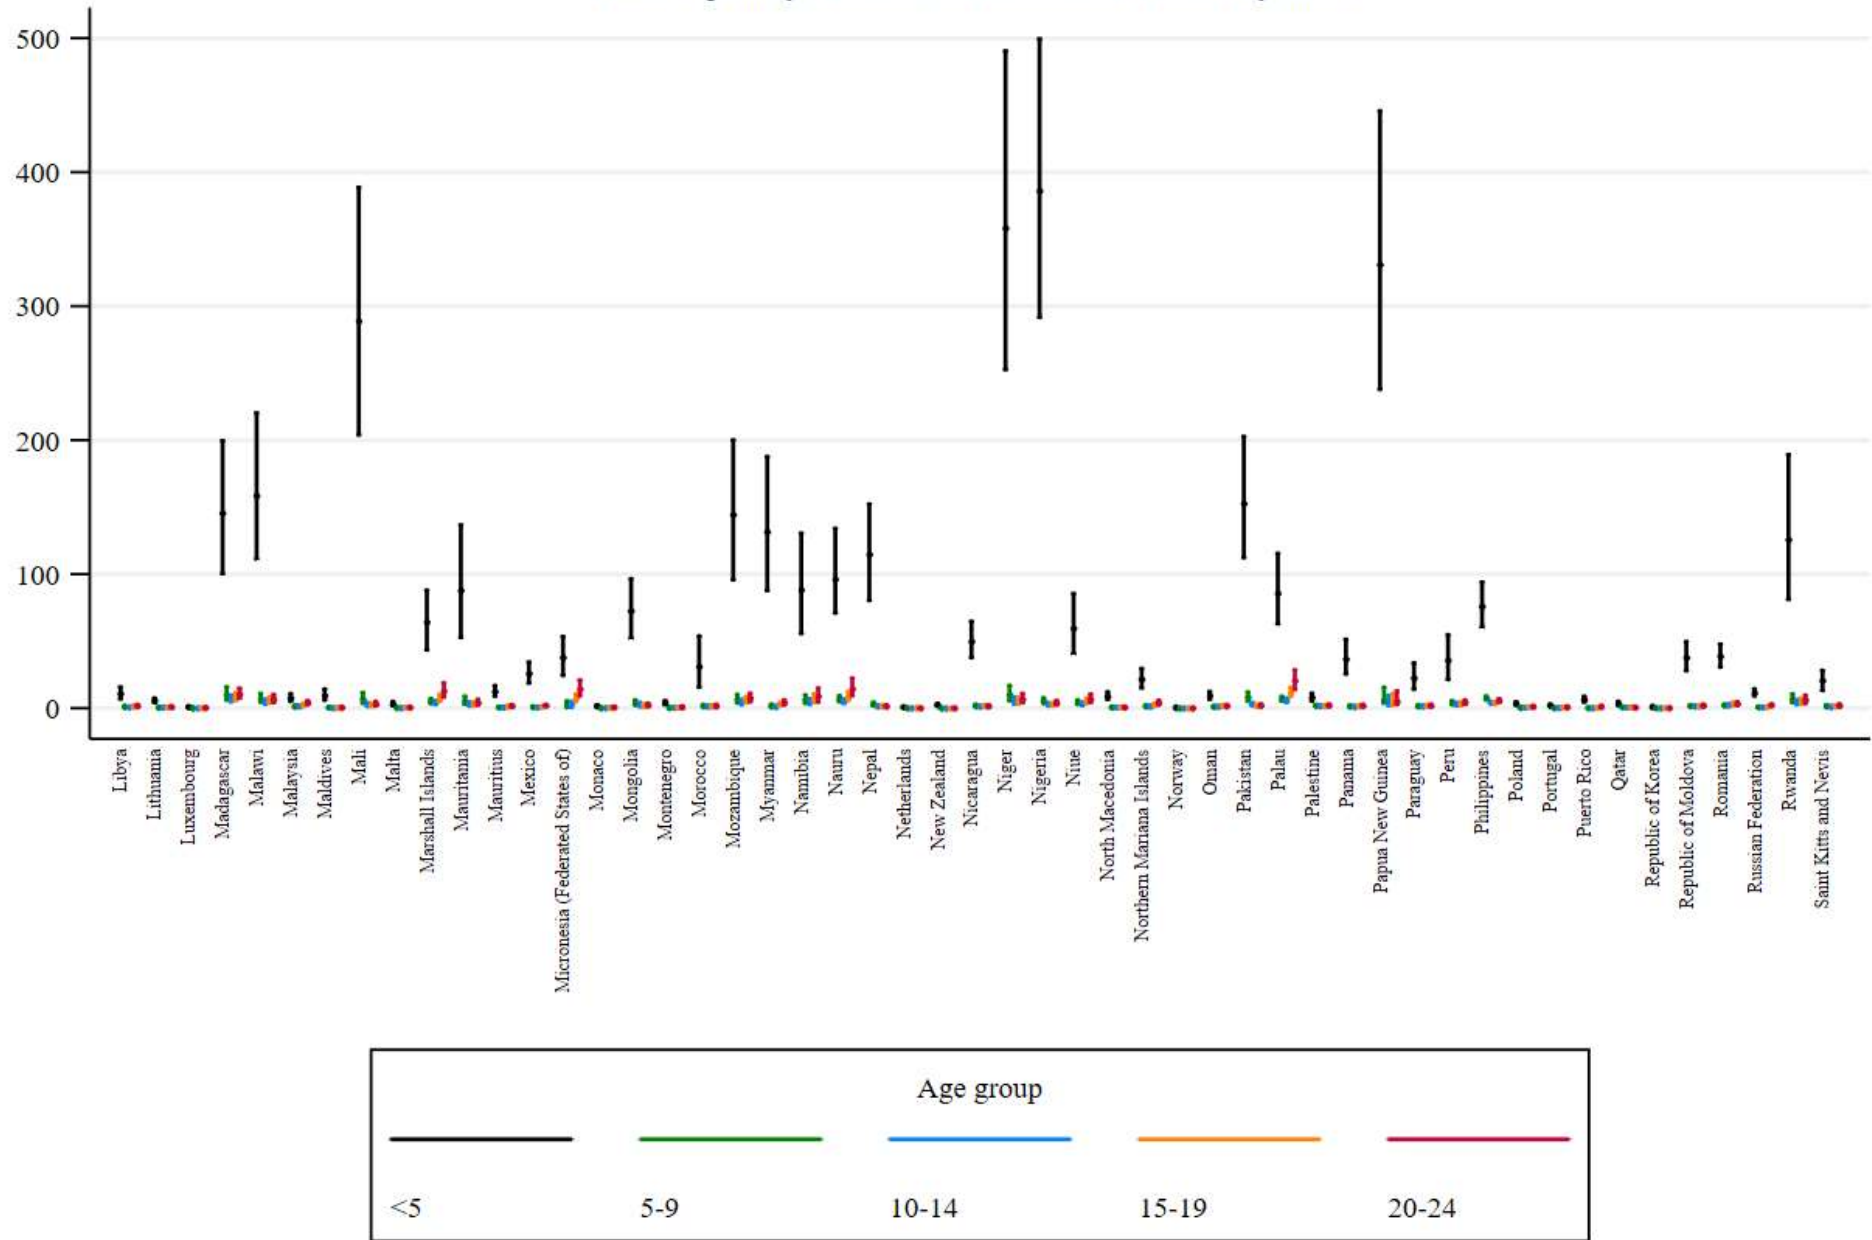

Lower respiratory infections: Deaths/100,000 Uncertainty interval

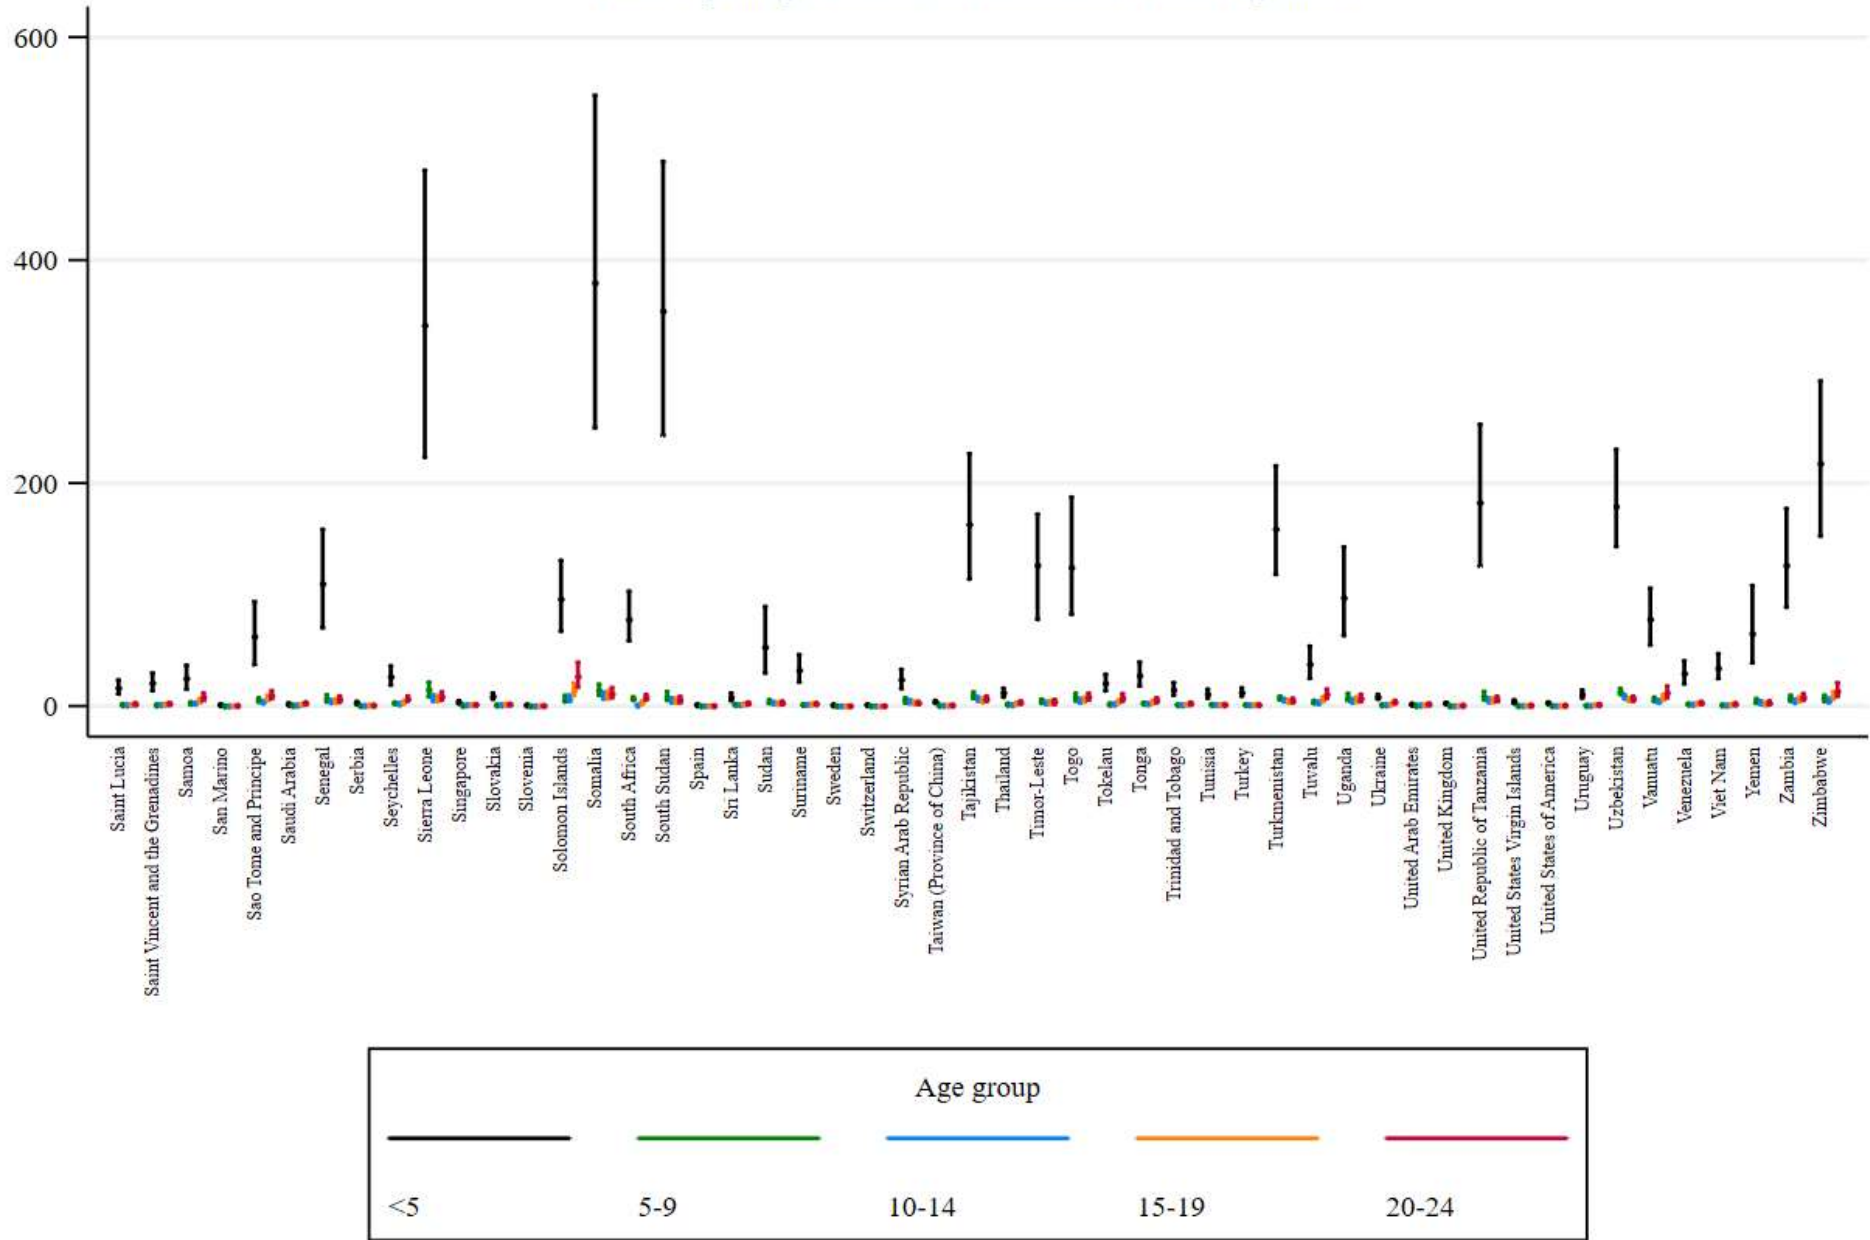

S20\_4 Part B: Lower respiratory infections DALYs/ 100 000 Uncertainty interval for each age group

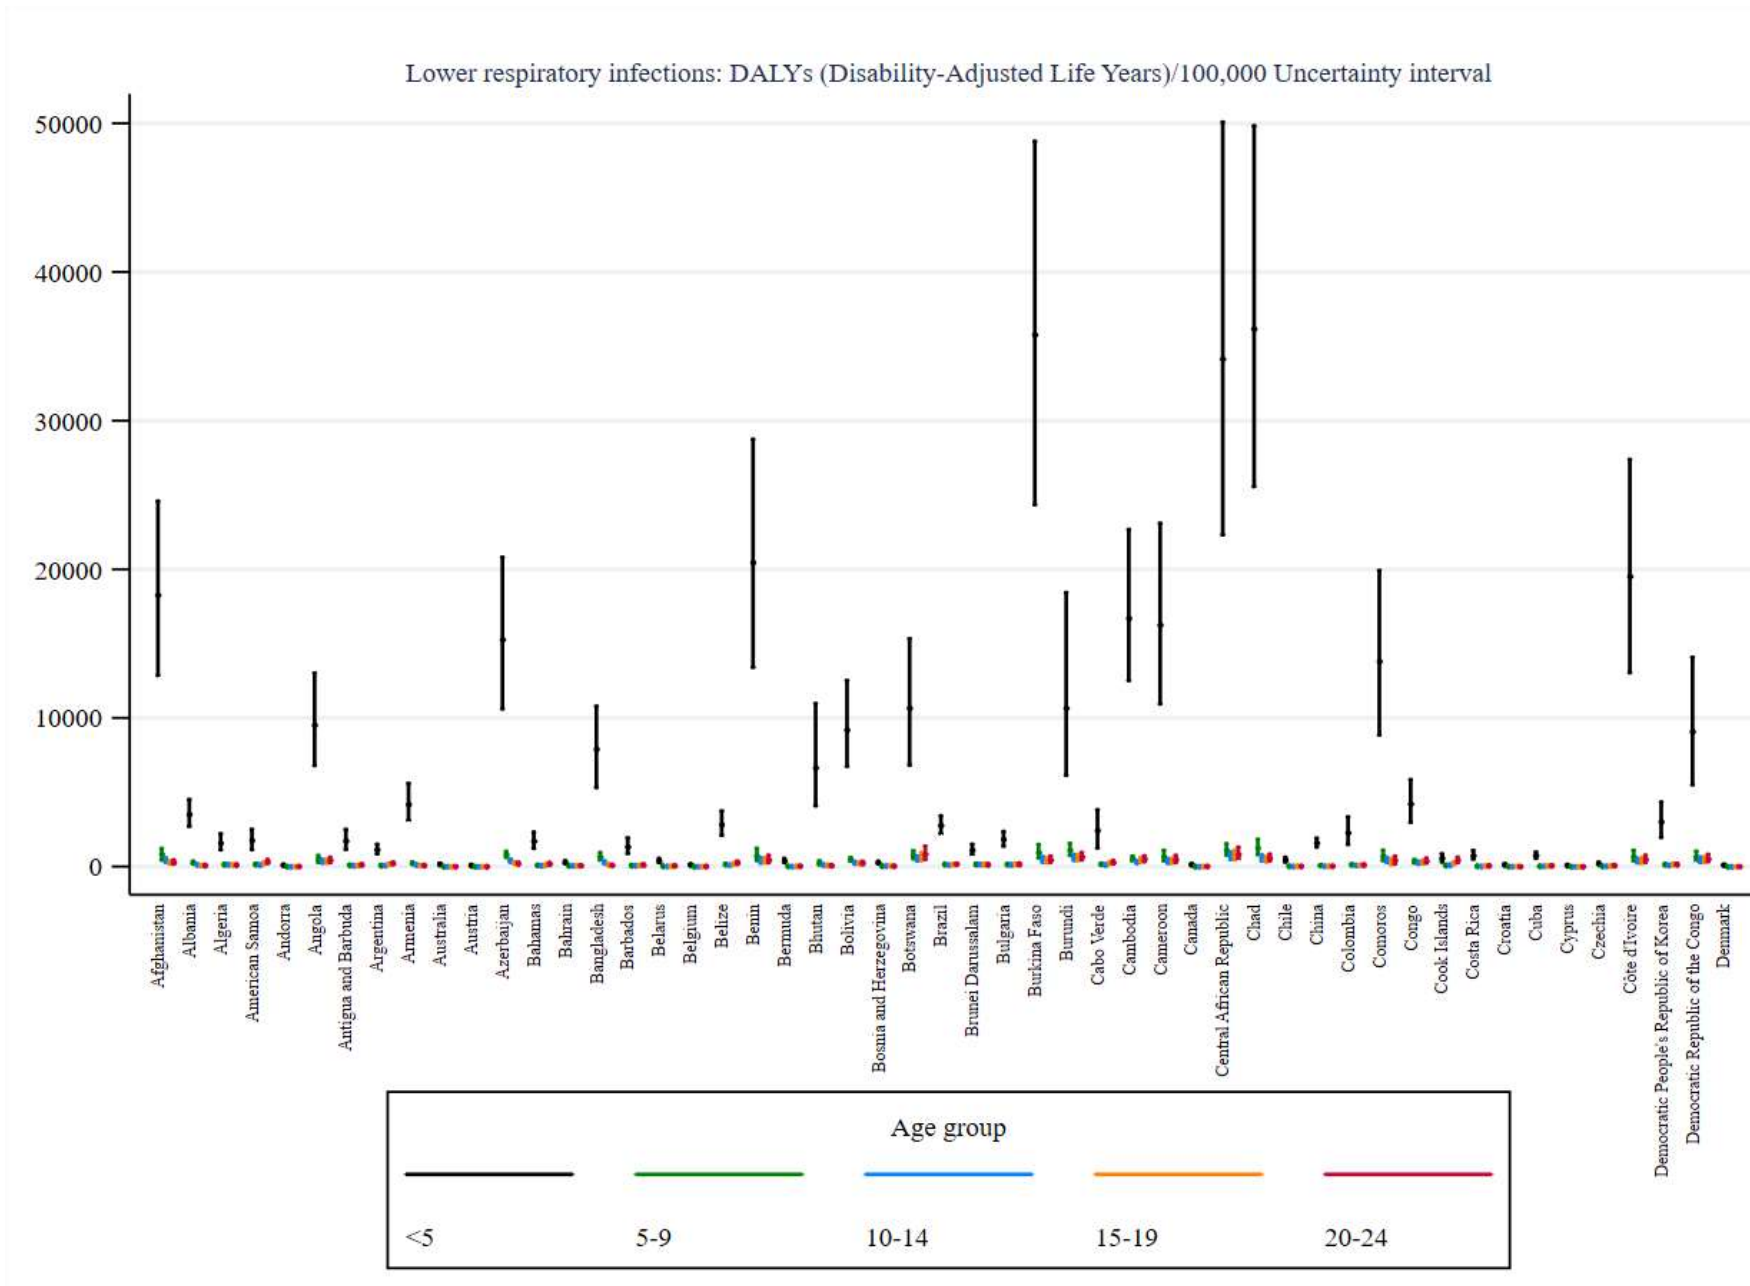

Lower respiratory infections: DALYs (Disability-Adjusted Life Years)/100,000 Uncertainty interval

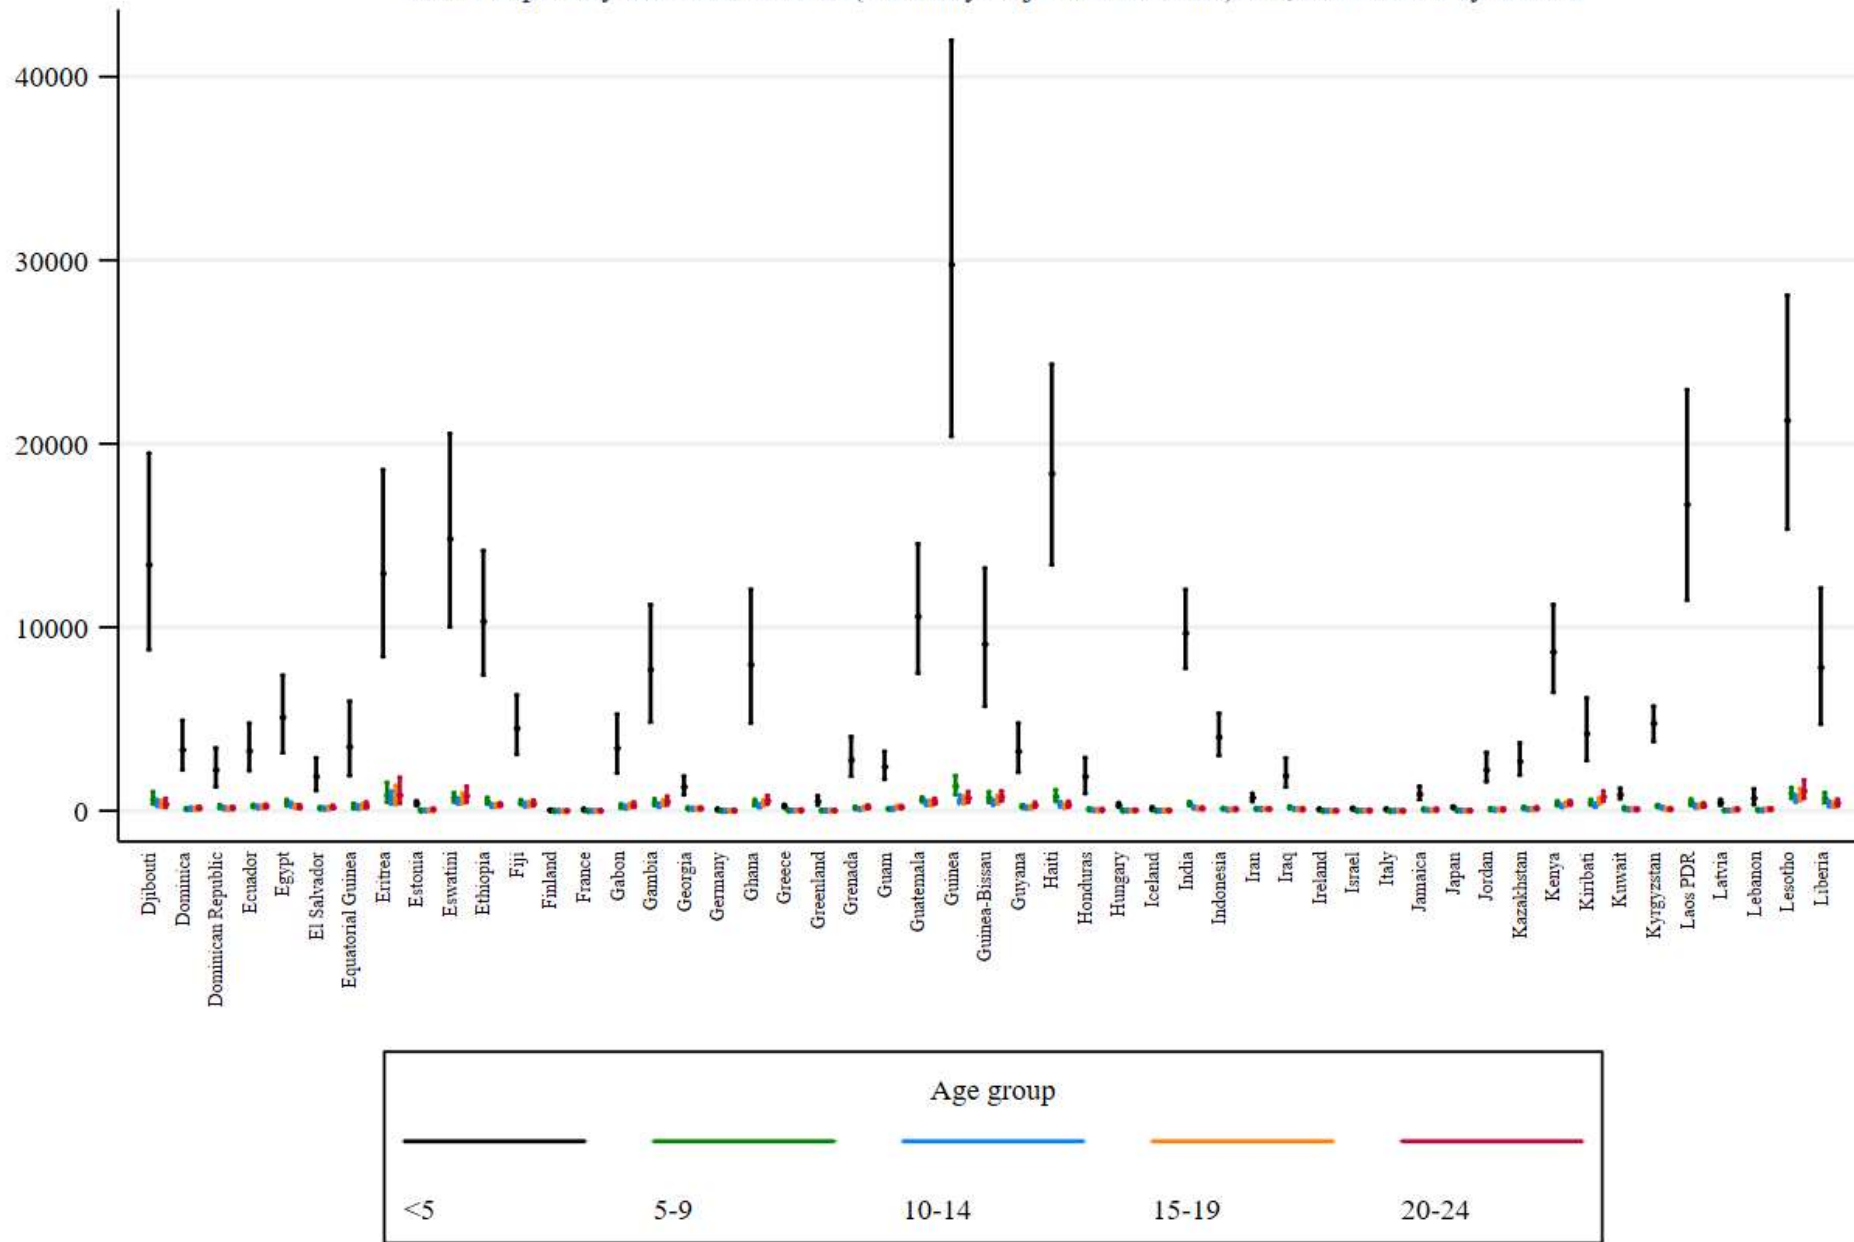



Lower respiratory infections: DALYs (Disability-Adjusted Life Years)/100,000 Uncertainty interval

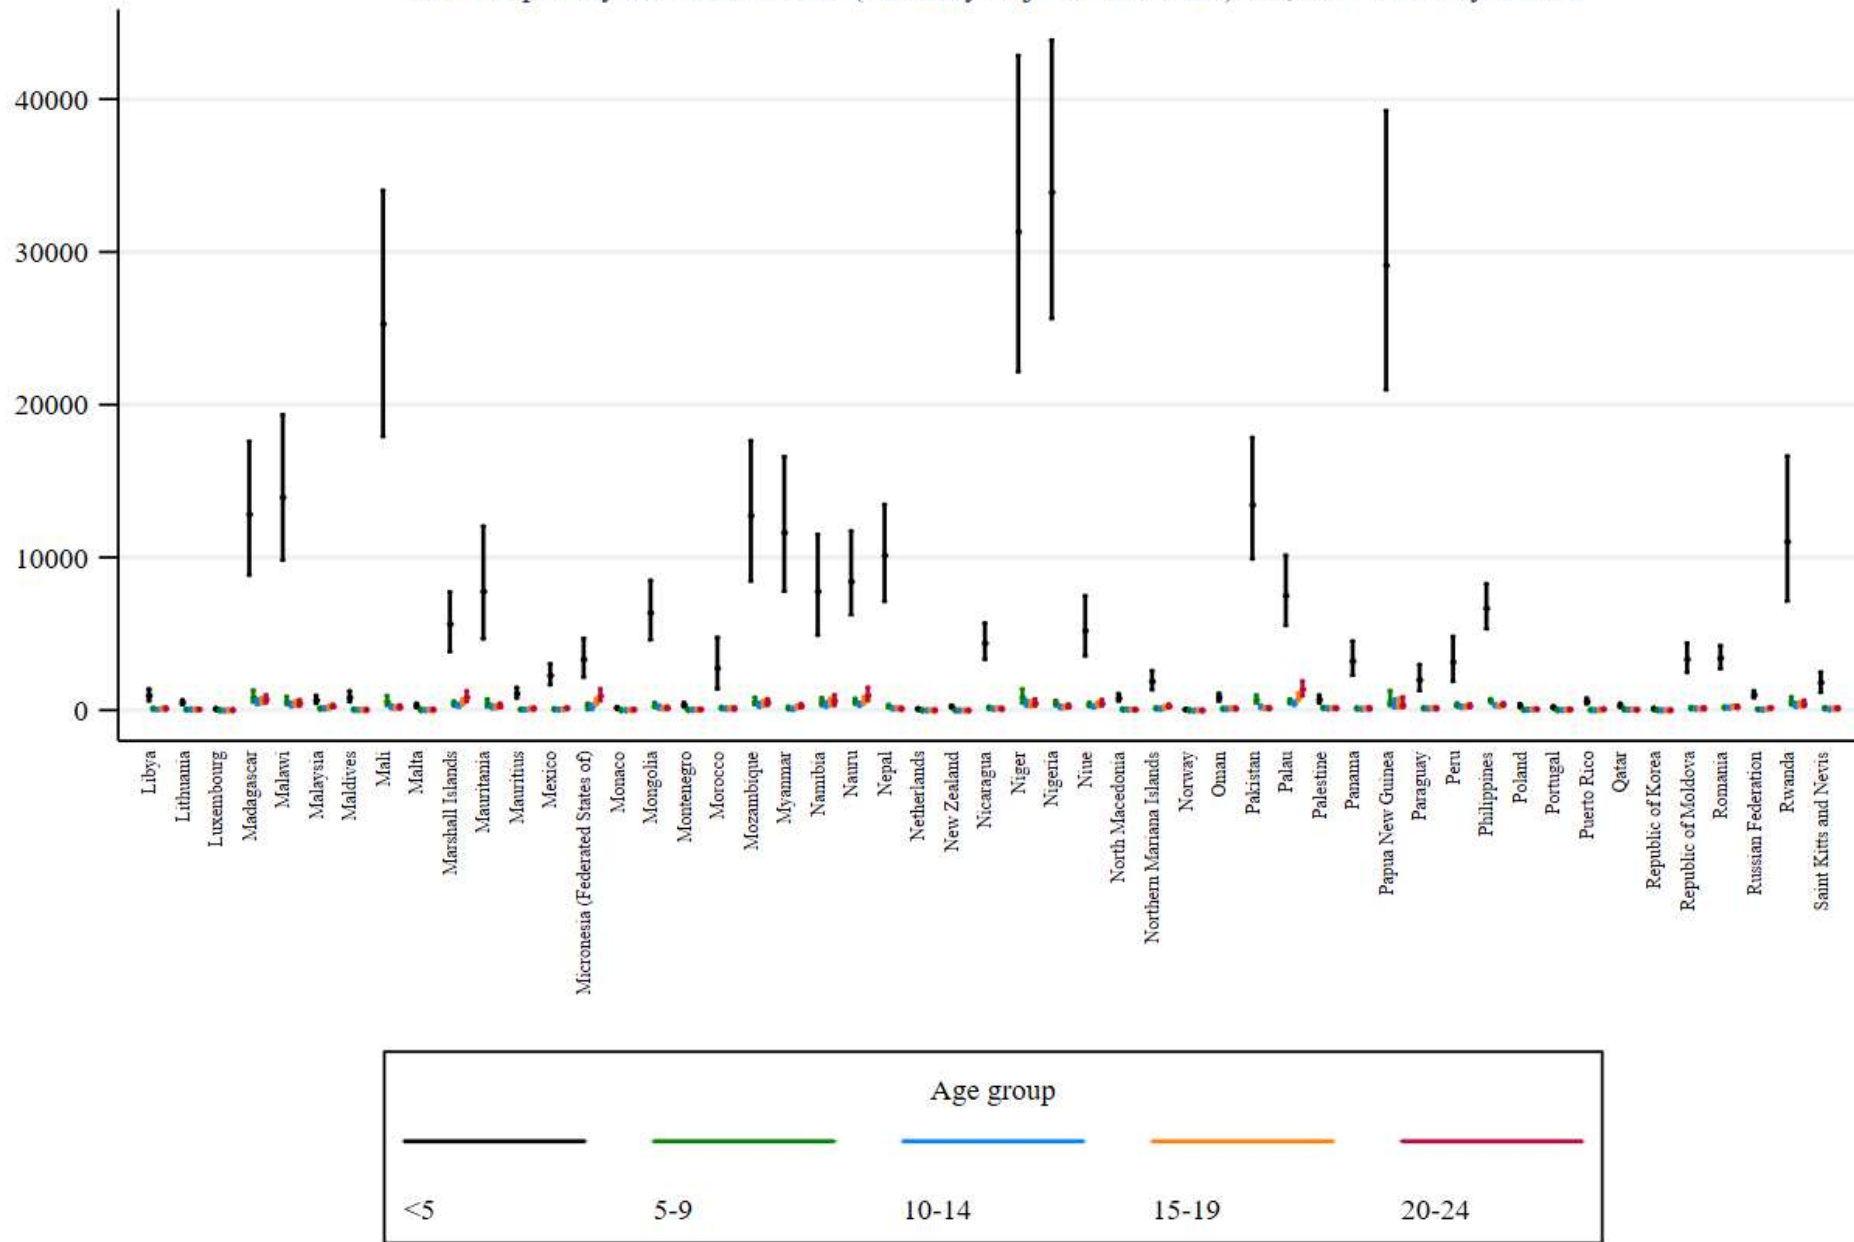

Lower respiratory infections: DALYs (Disability-Adjusted Life Years)/100,000 Uncertainty interval

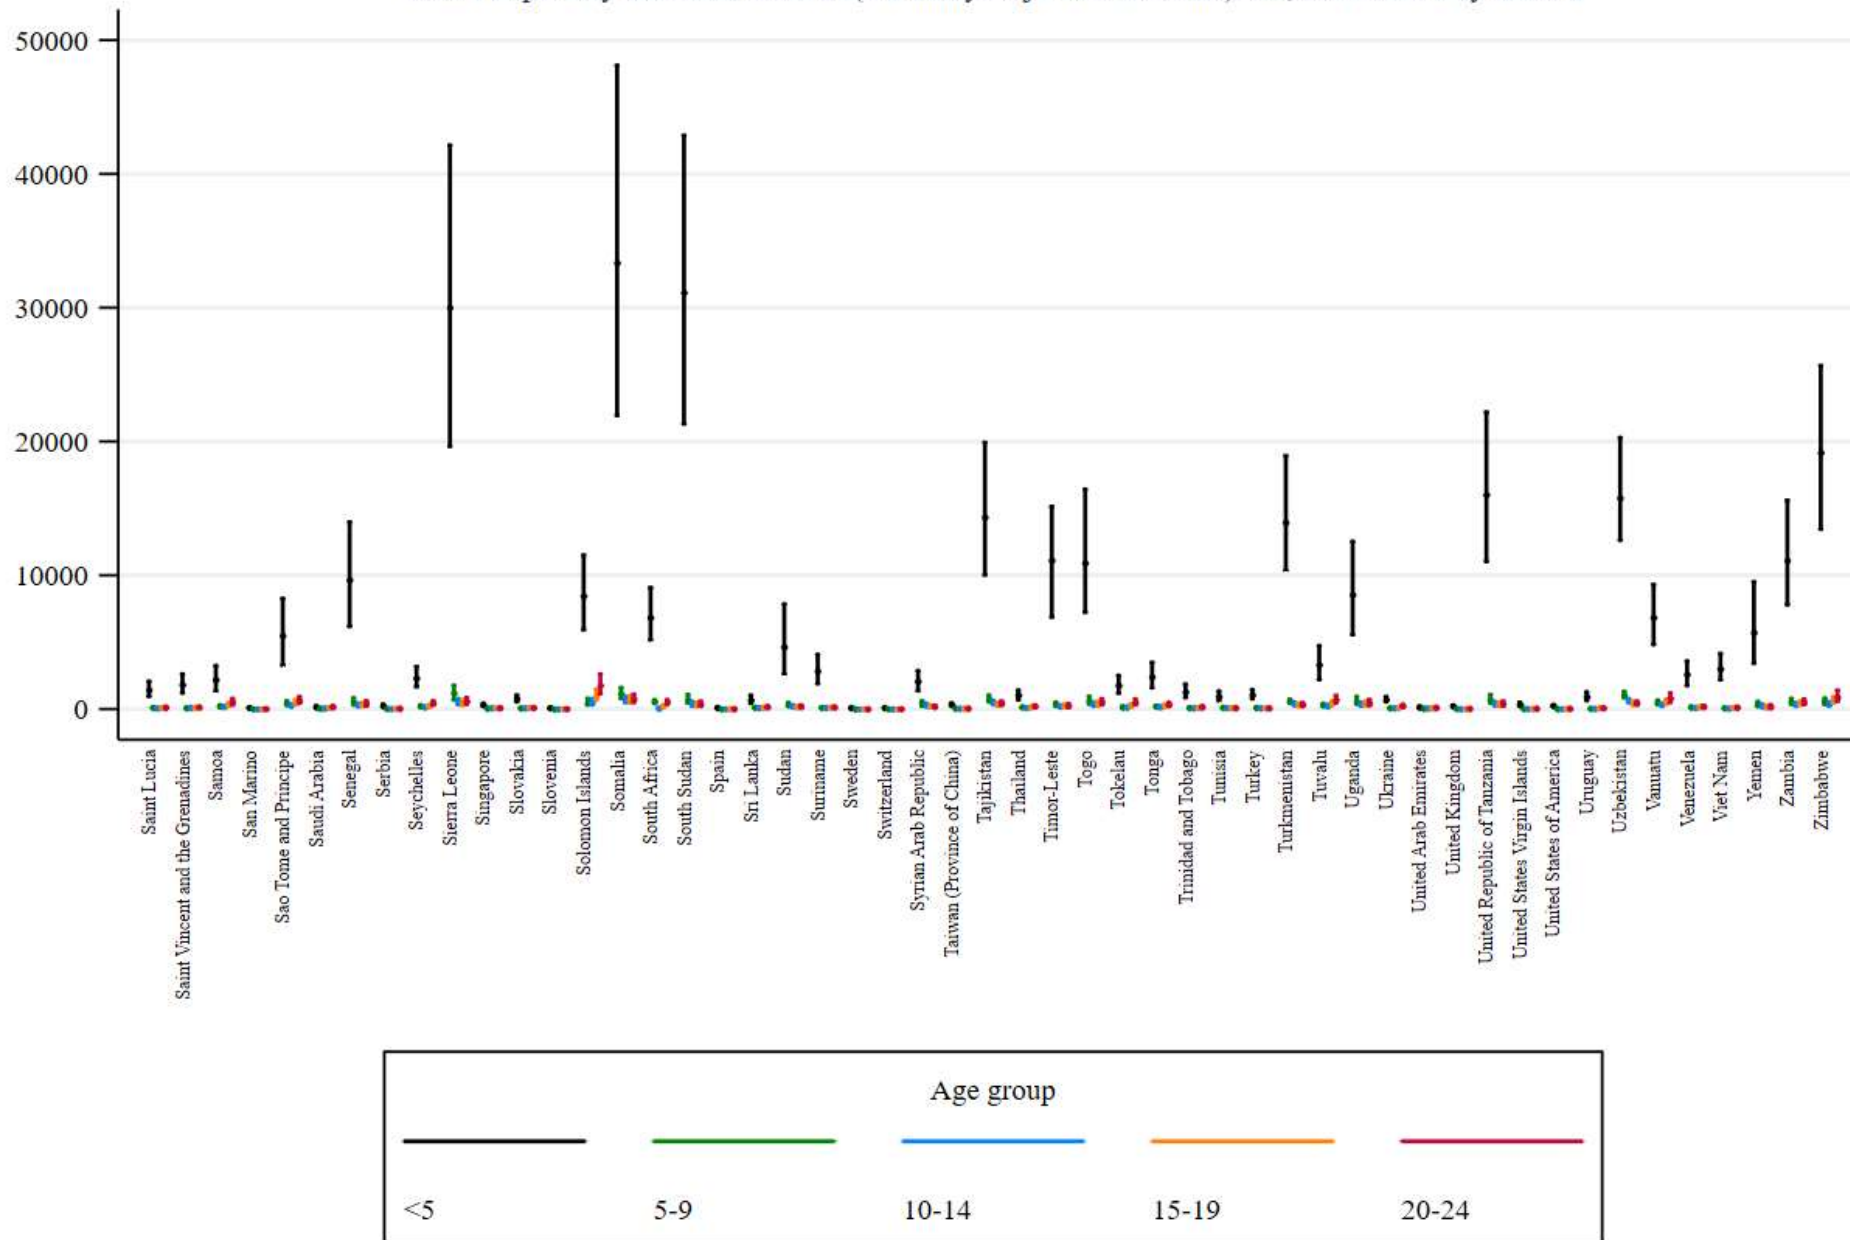

S20\_4 Part A: Malaria Deaths/ 100 000 Uncertainty interval for each age group

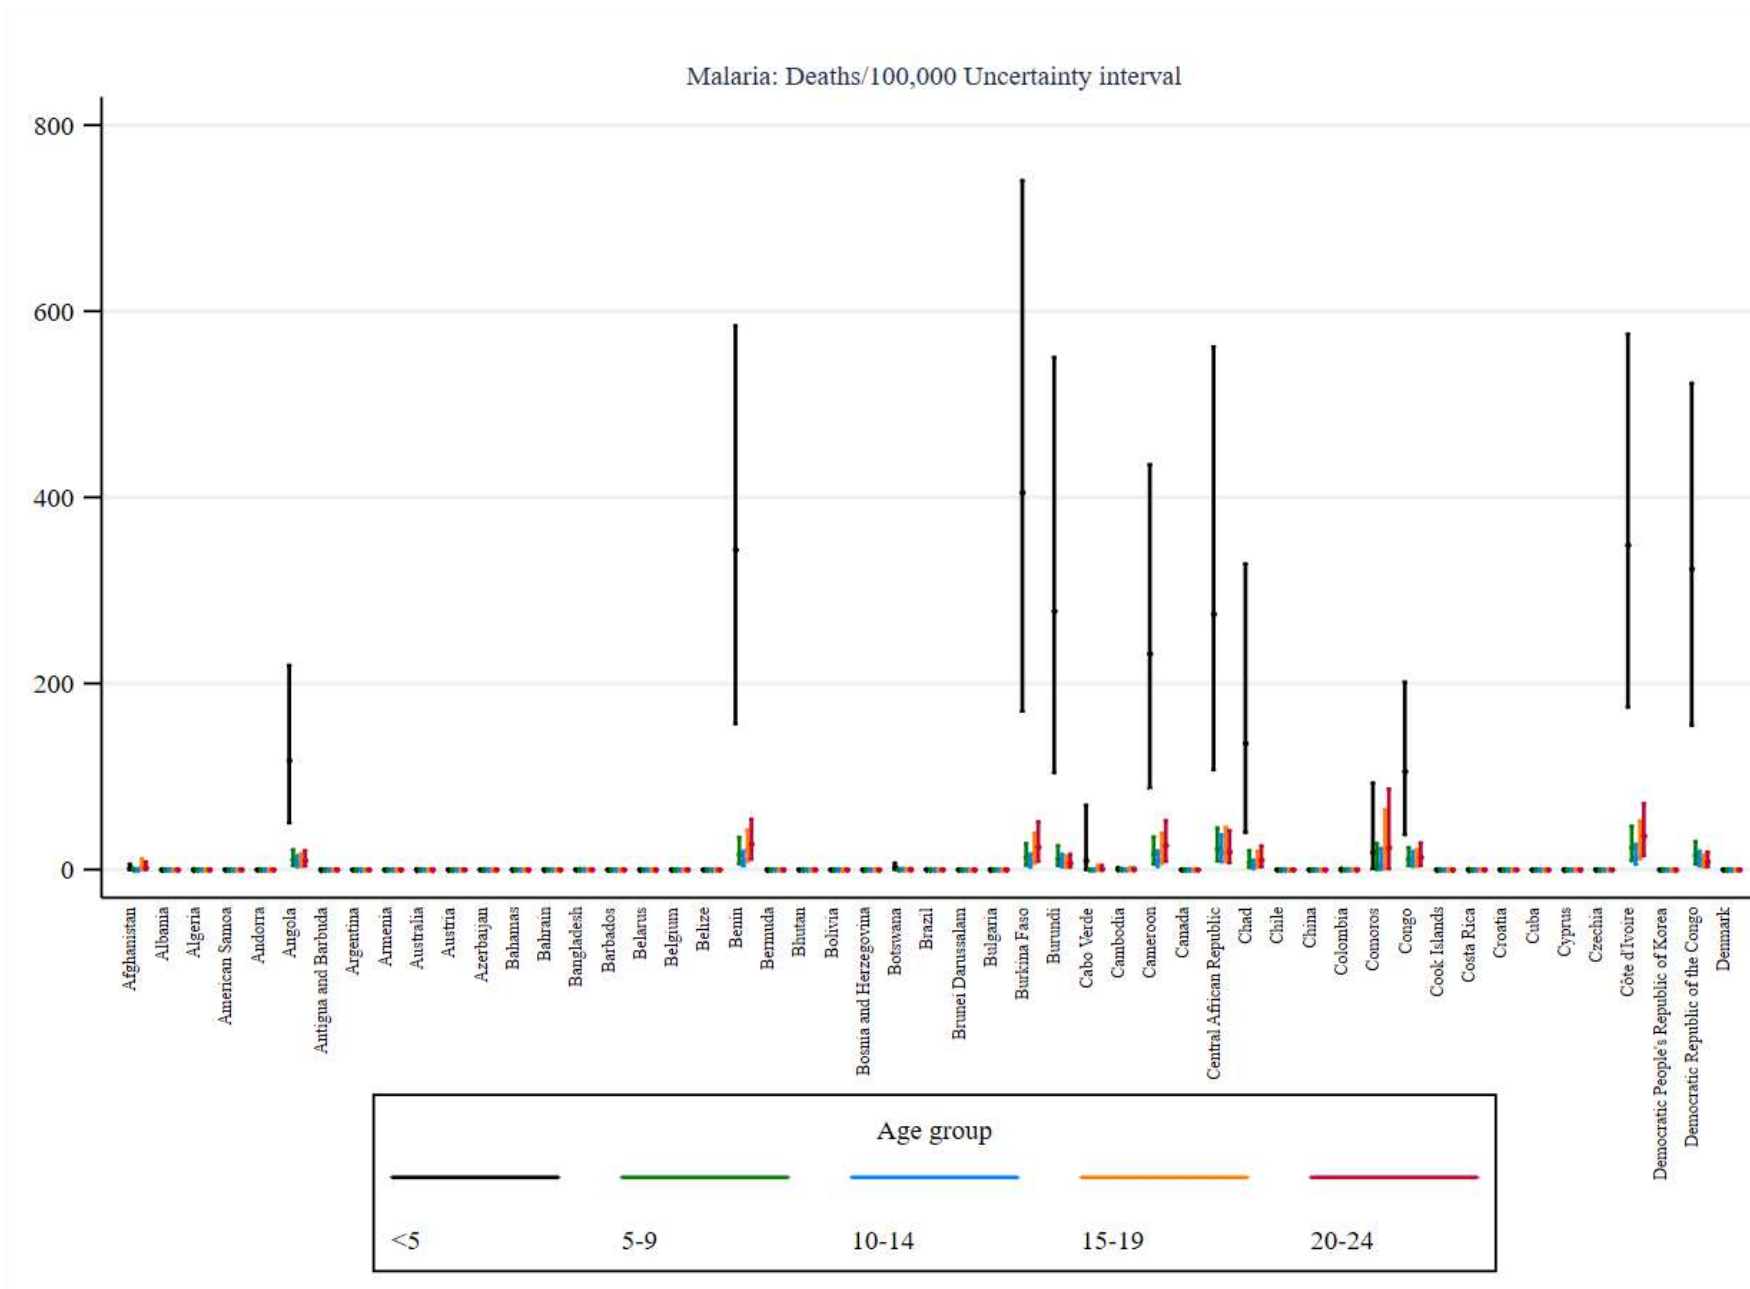

Malaria: Deaths/100,000 Uncertainty interval

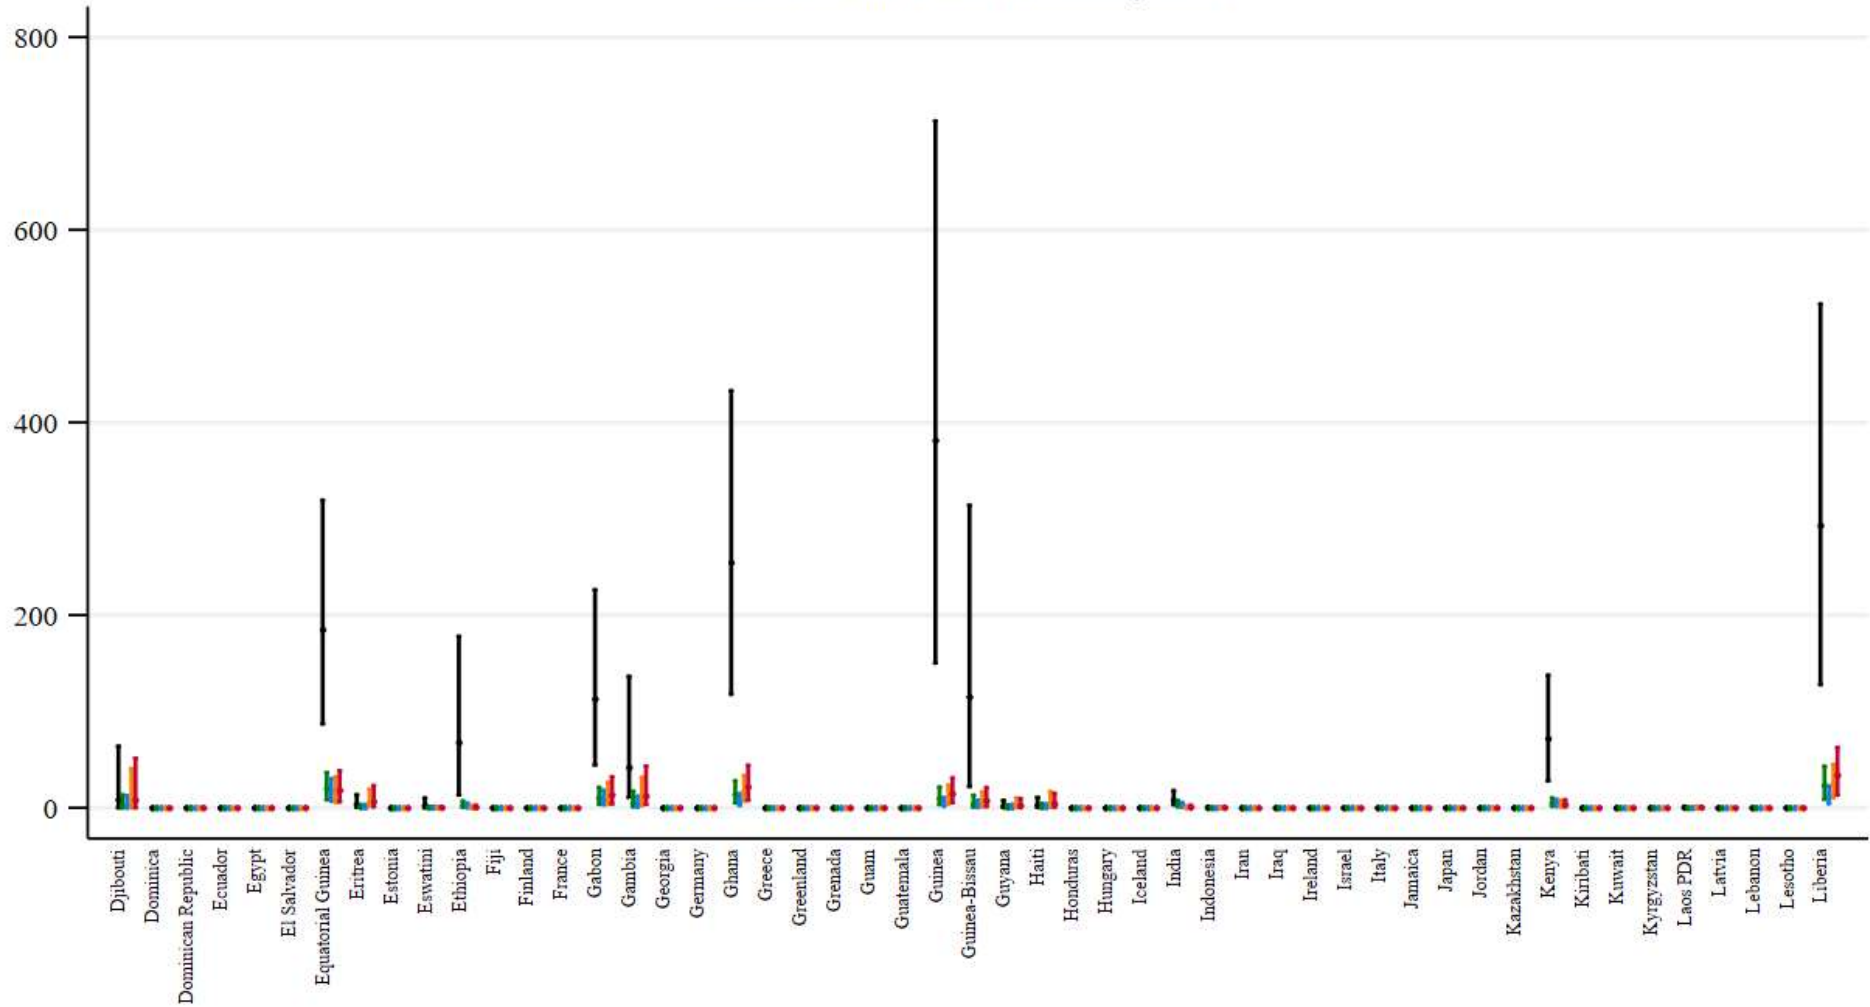

Malaria: Deaths/100,000 Uncertainty interval

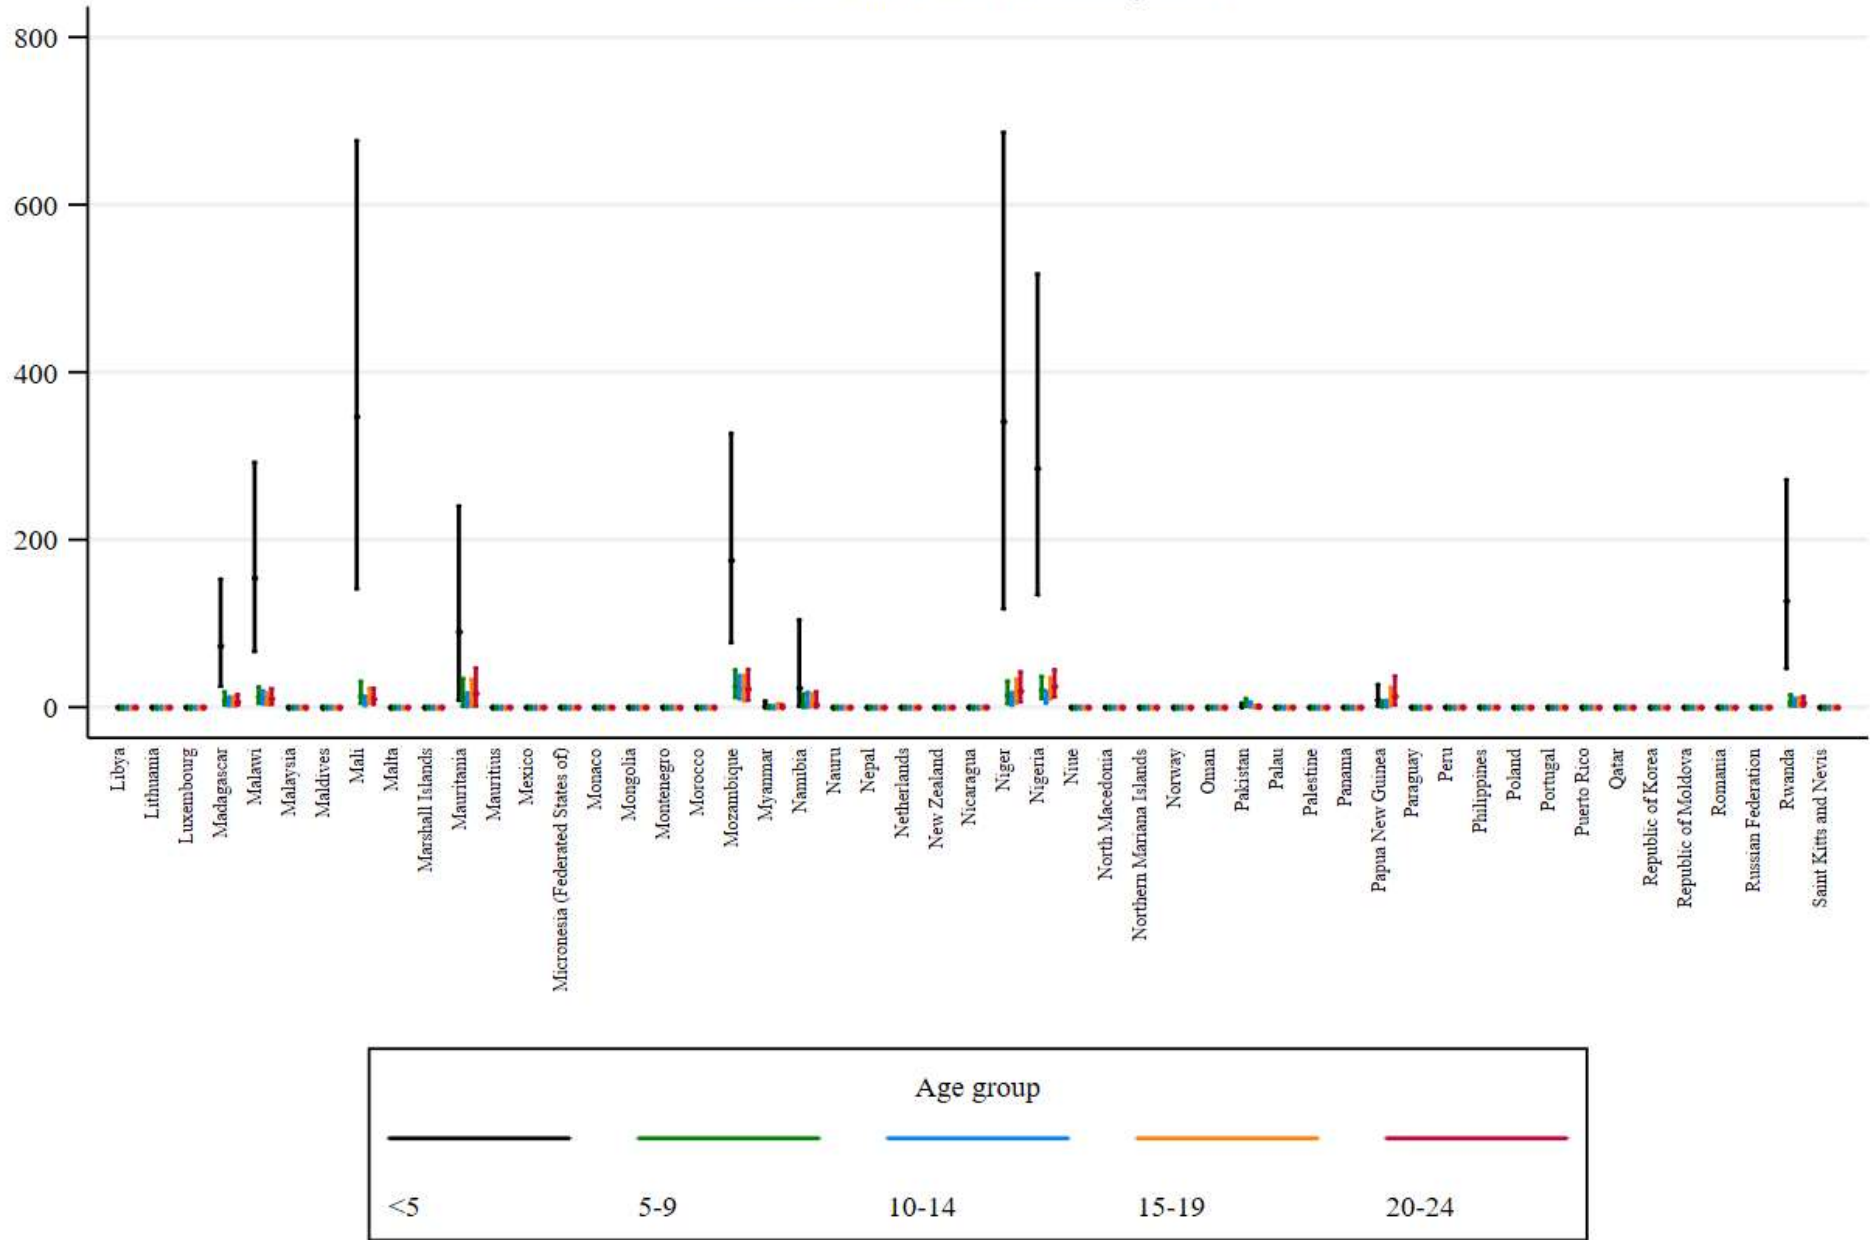

Malaria: Deaths/100,000 Uncertainty interval

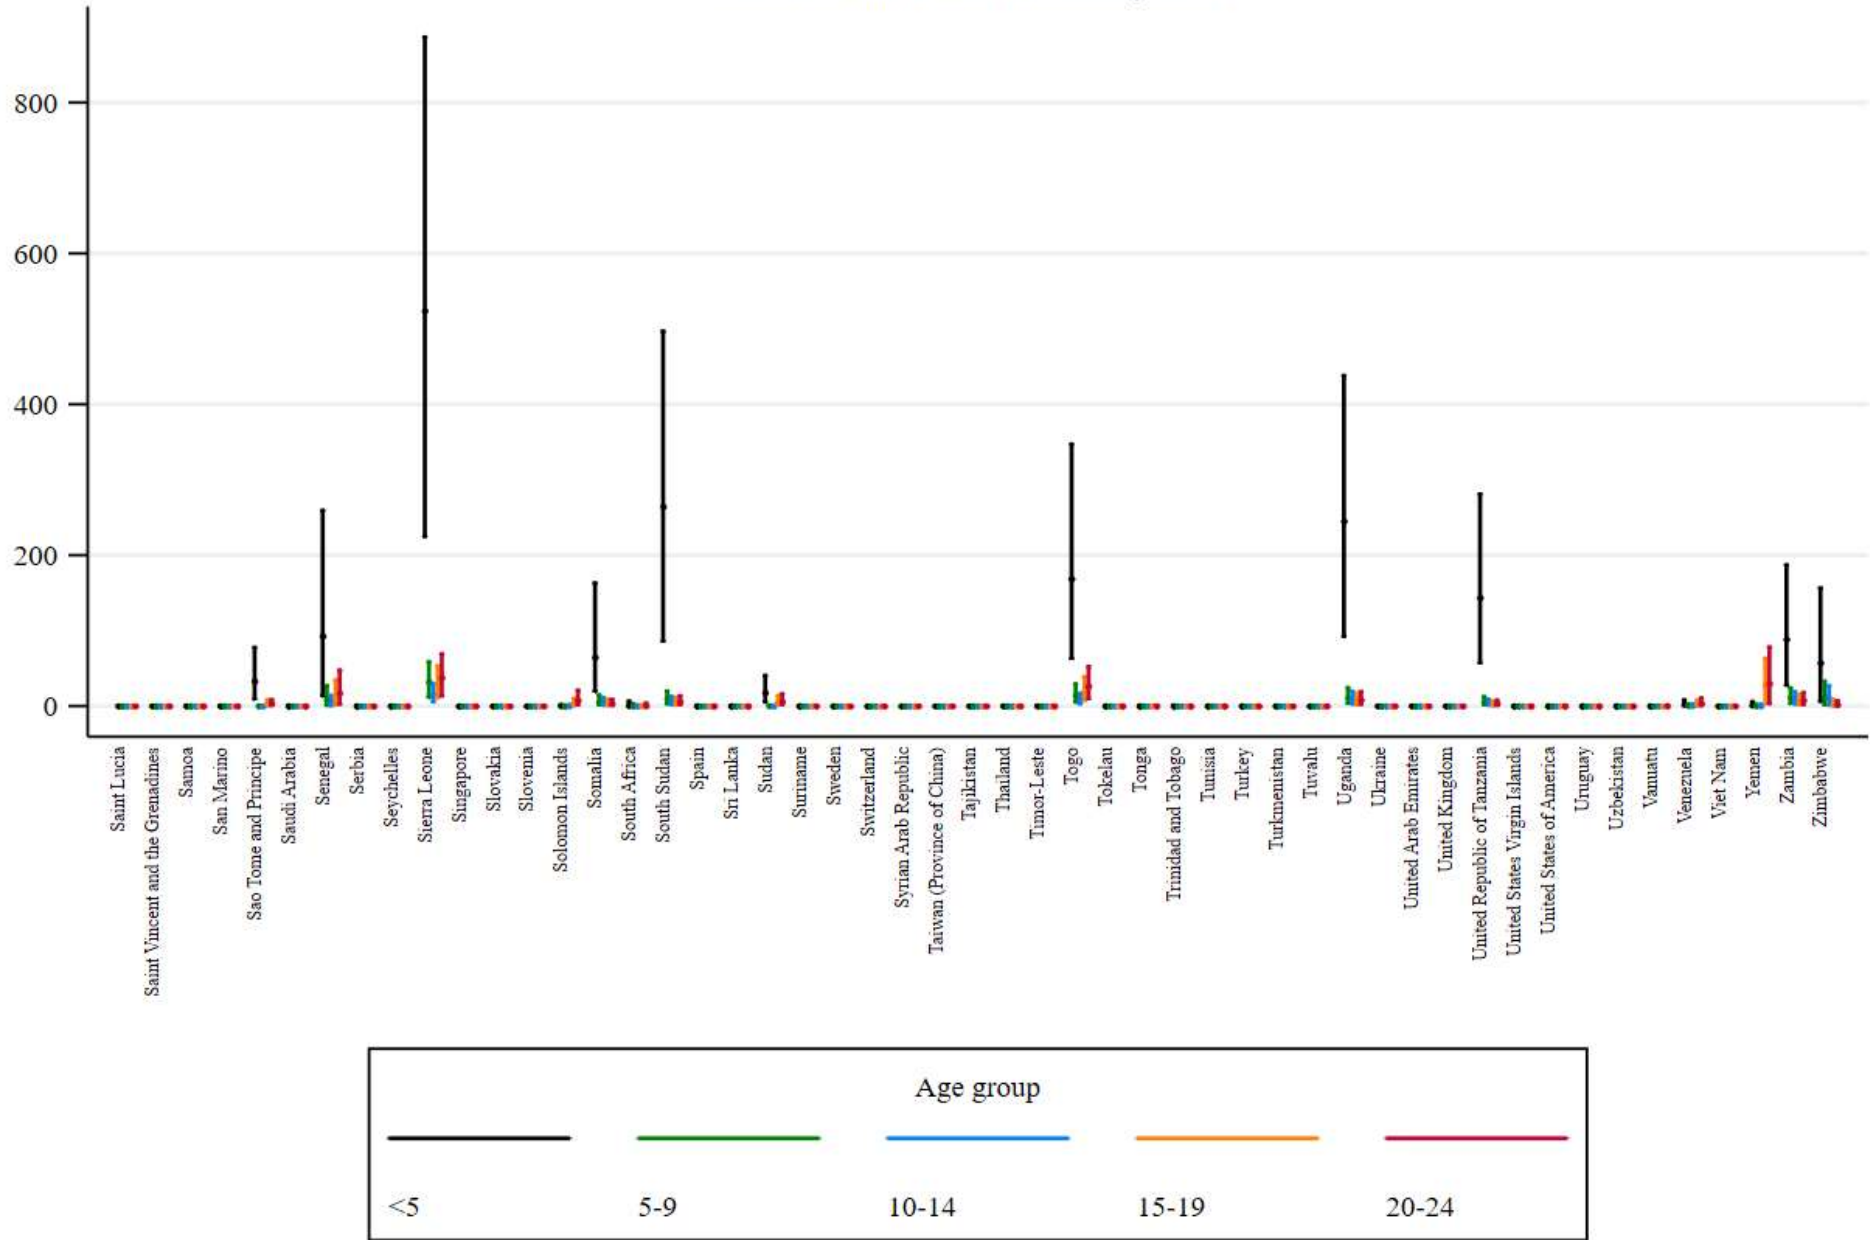

S20\_4 Part B: Malaria DALYs/ 100 000 Uncertainty interval for each age group

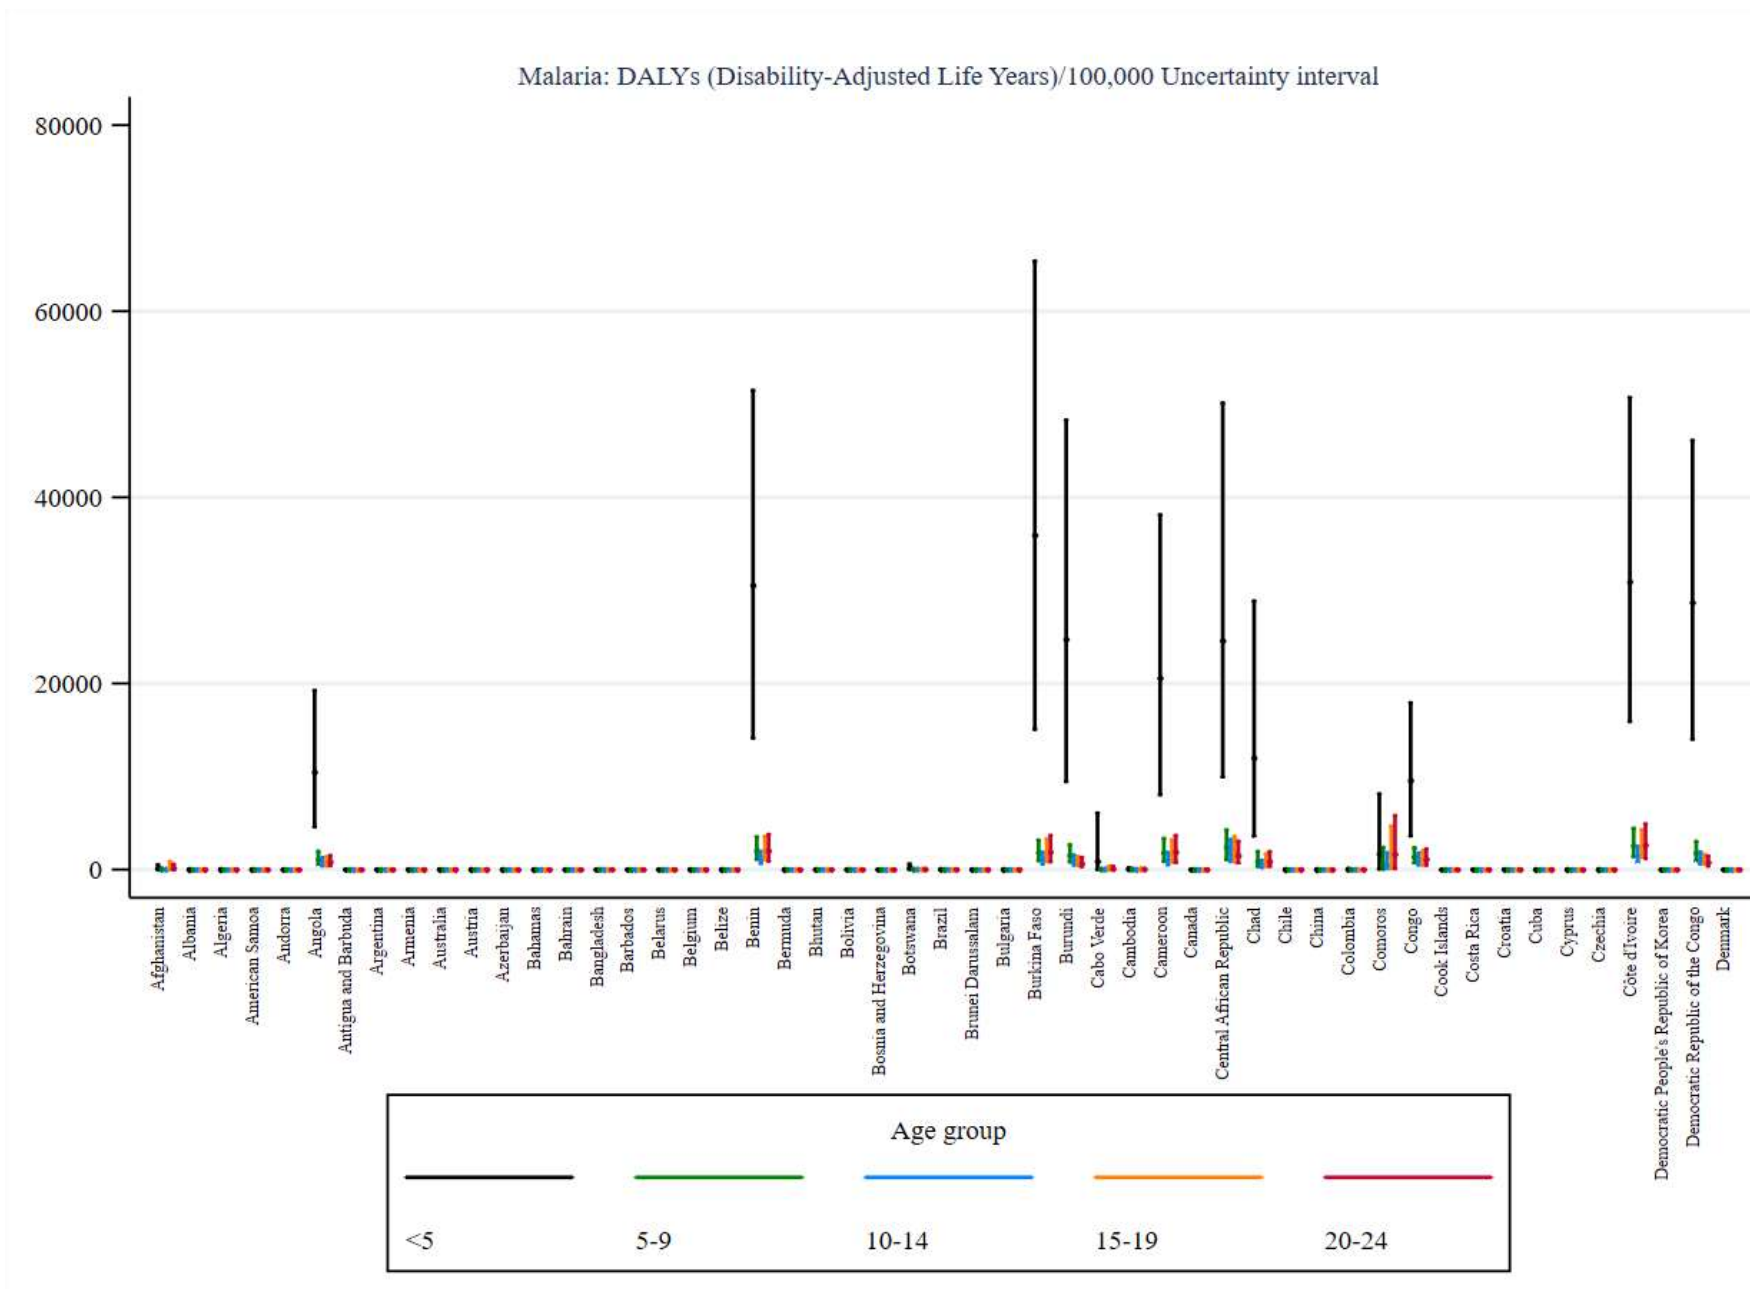

Malaria: DALYs (Disability-Adjusted Life Years)/100,000 Uncertainty interval

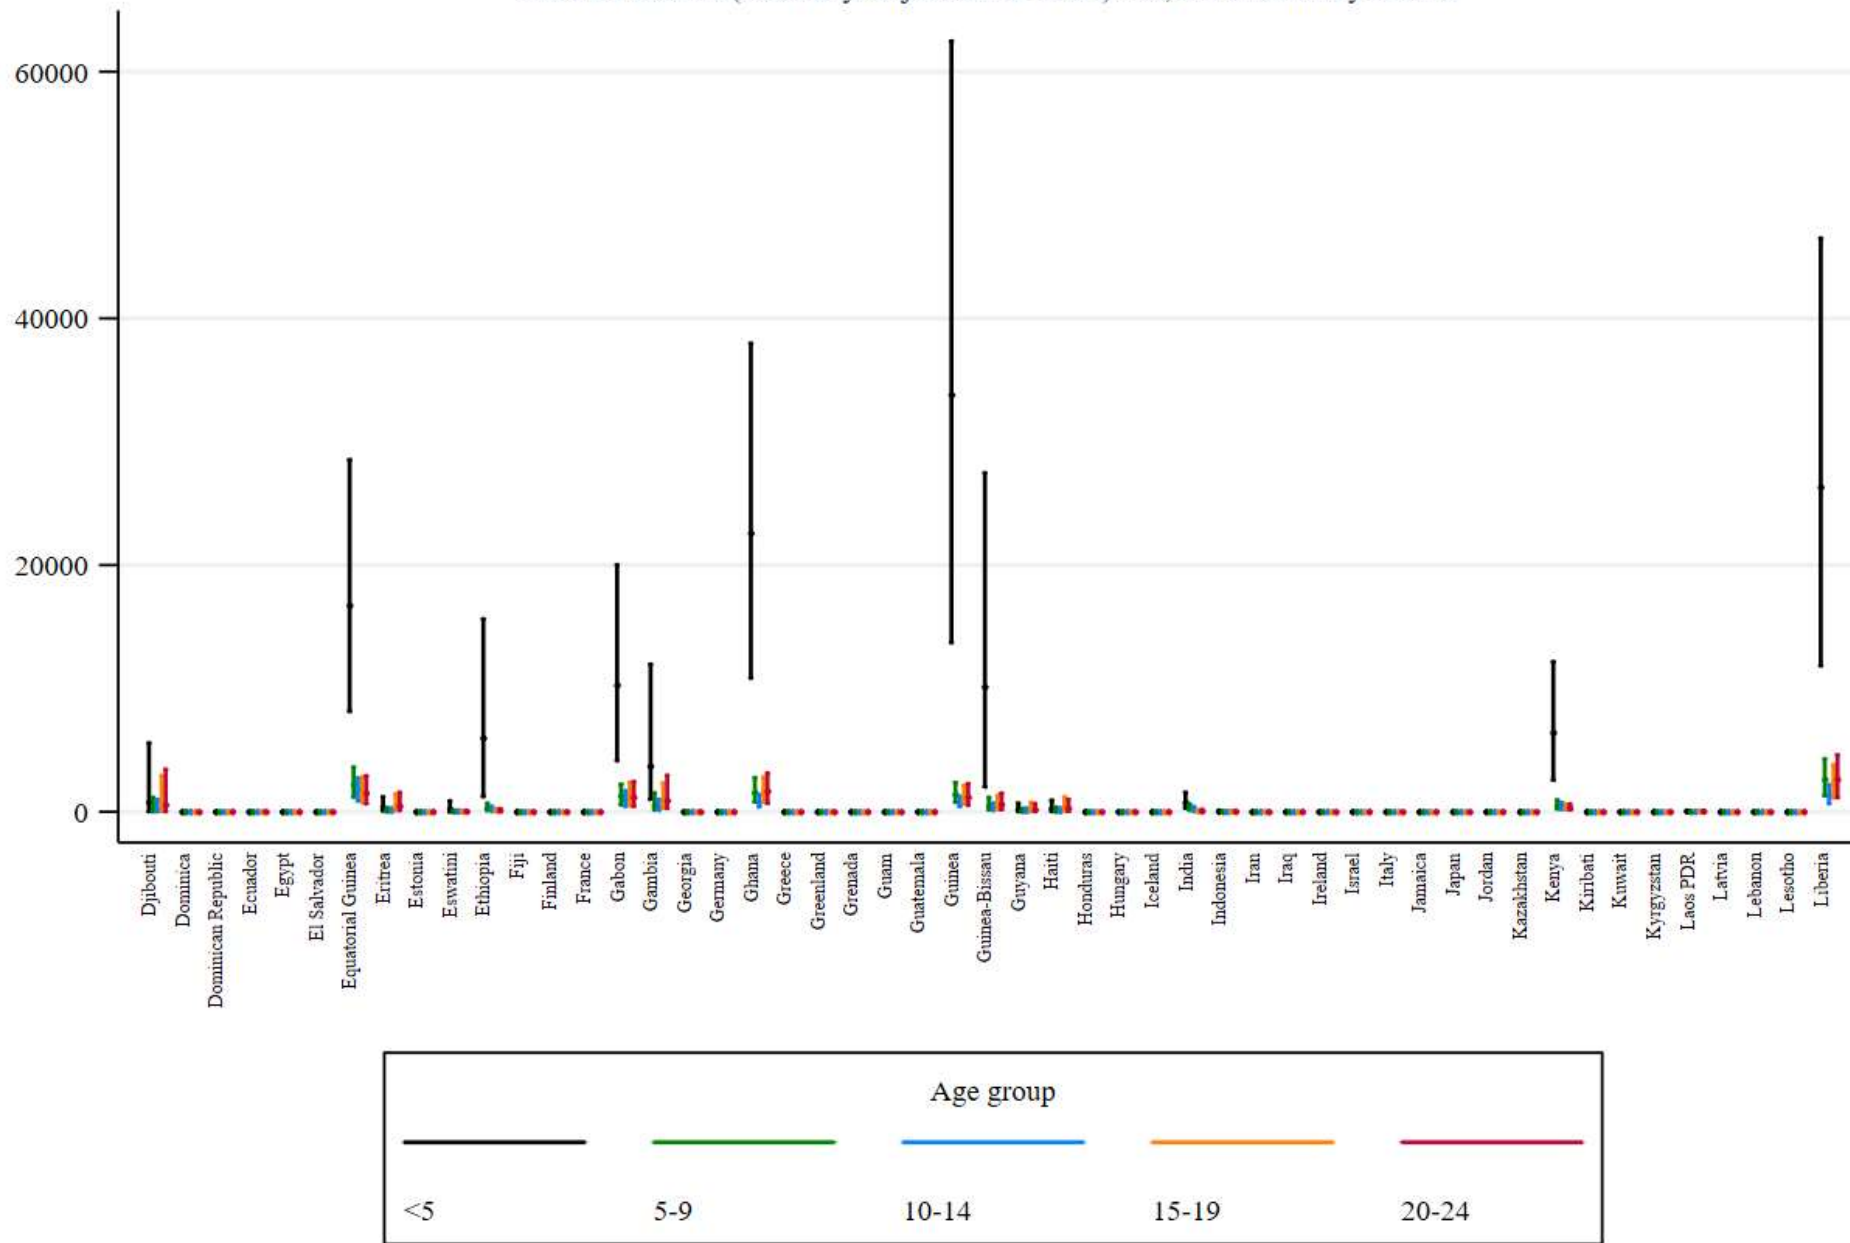



Malaria: DALYs (Disability-Adjusted Life Years)/100,000 Uncertainty interval

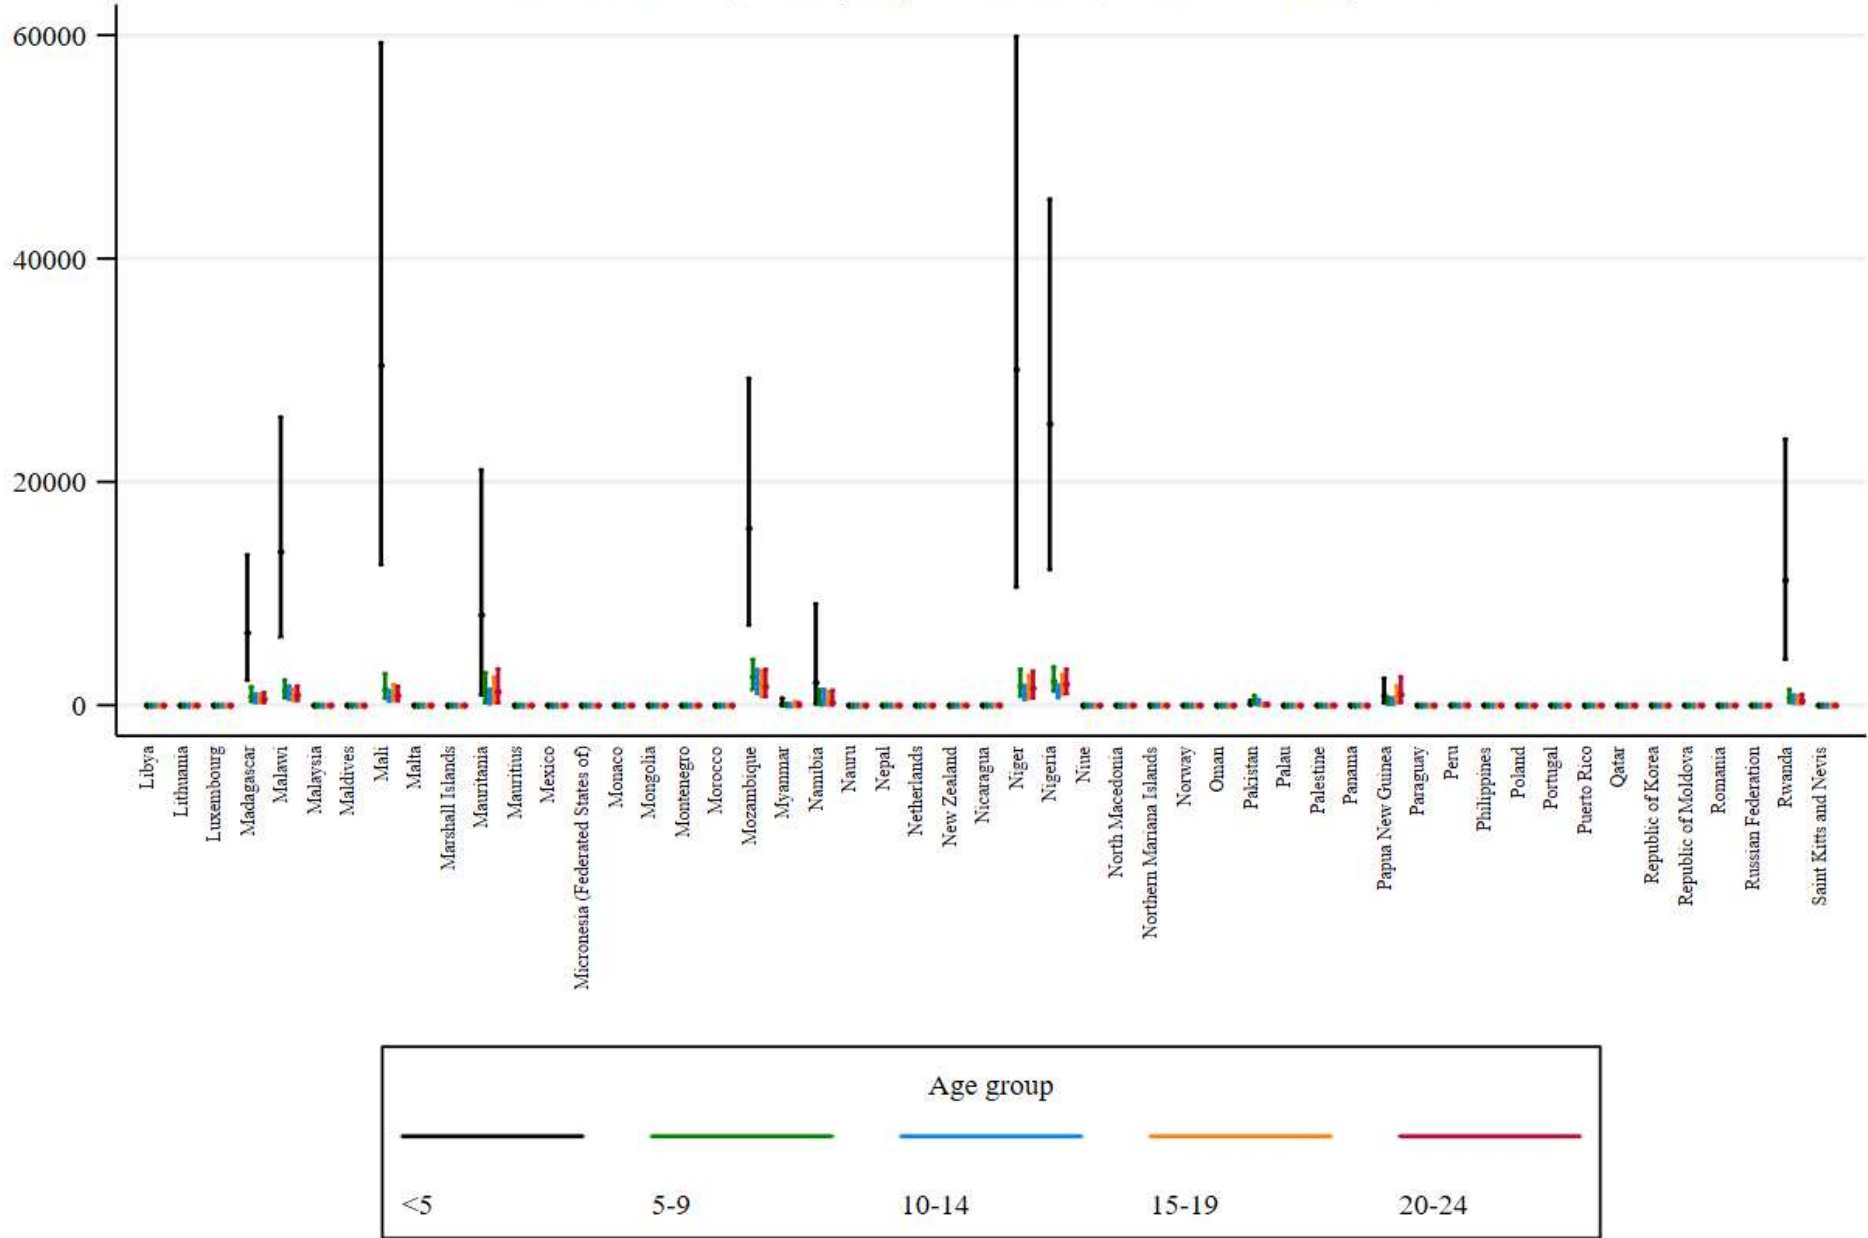

Malaria: DALYs (Disability-Adjusted Life Years)/100,000 Uncertainty interval

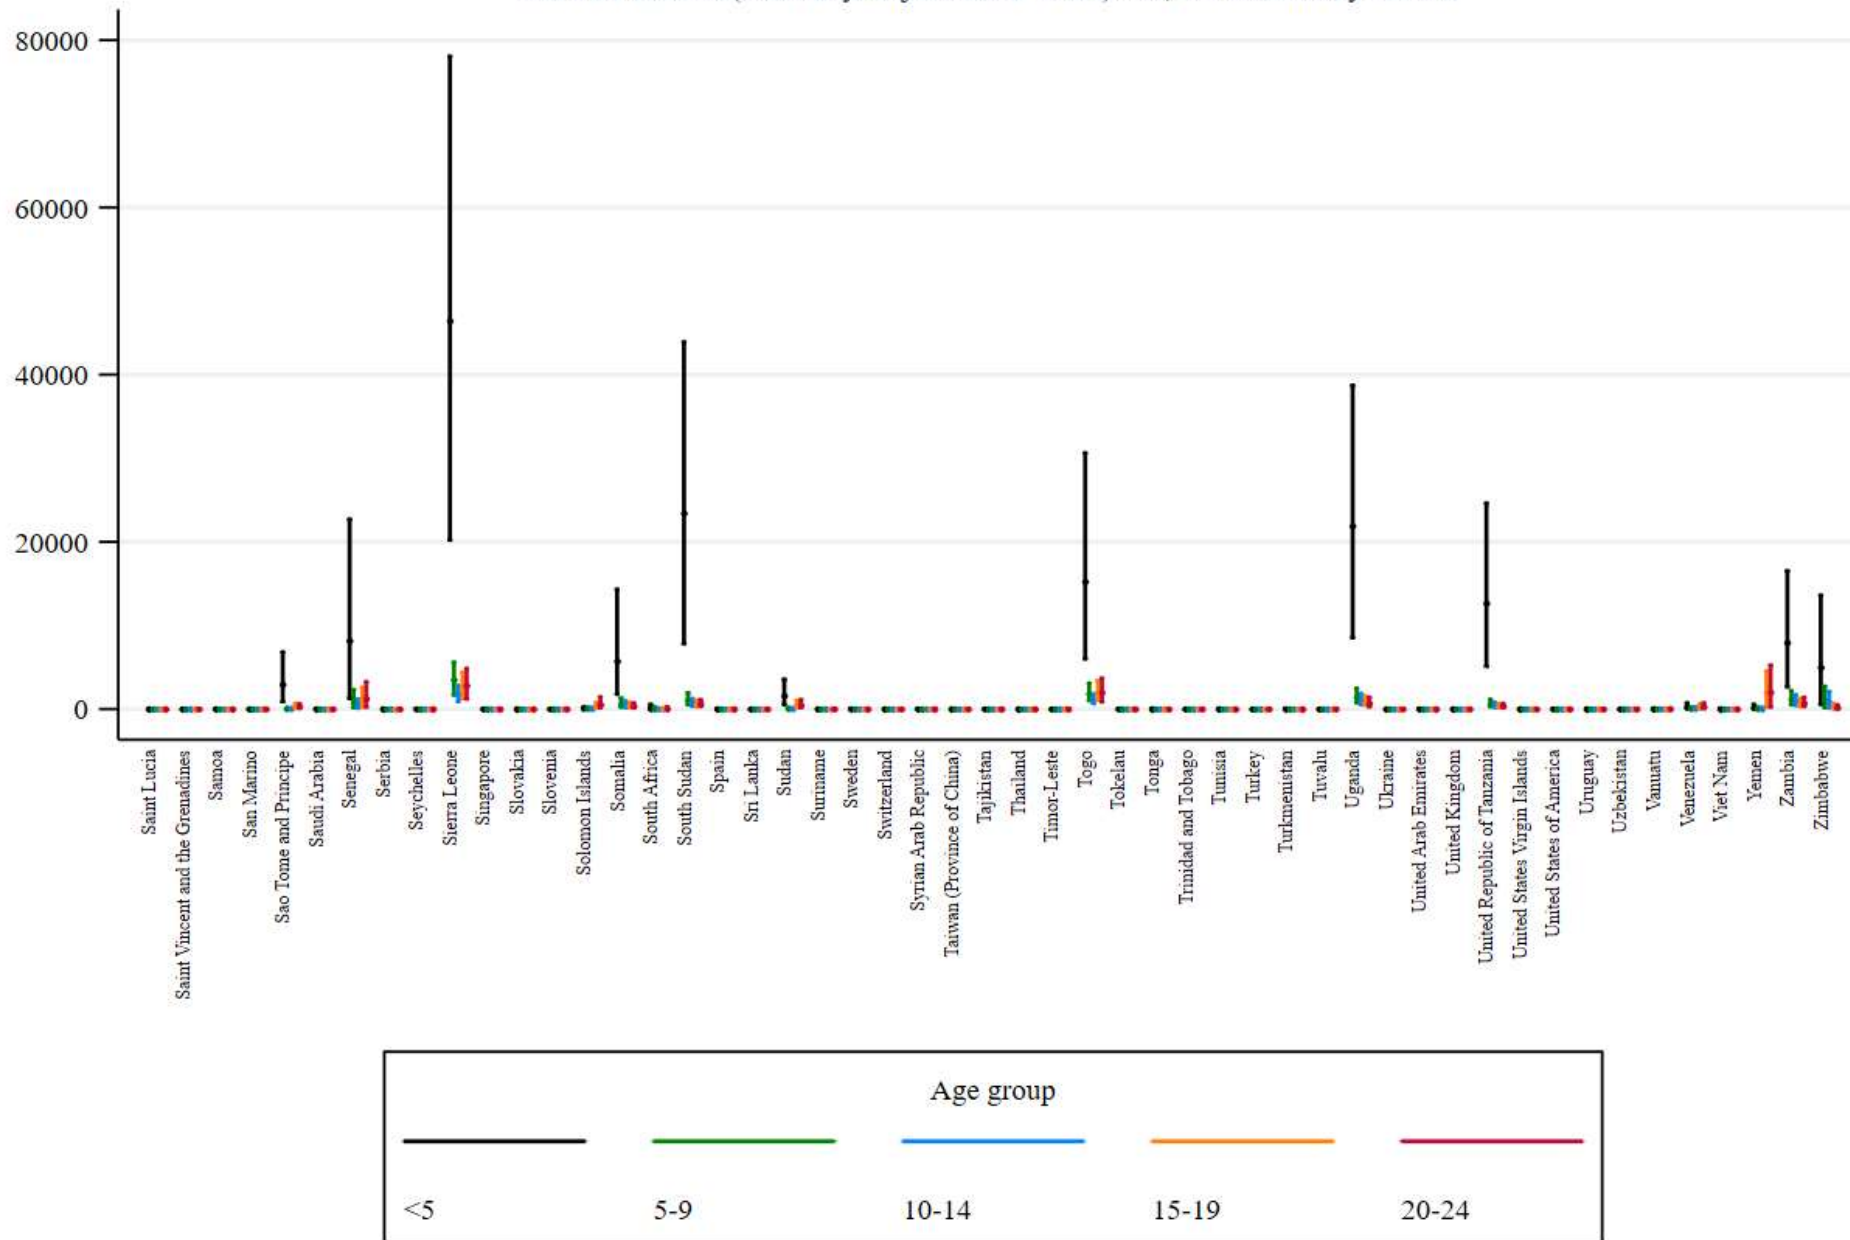

S20\_5 Part A: Maternal sepsis and other maternal infections Deaths/ 100 000 Uncertainty interval for each age group

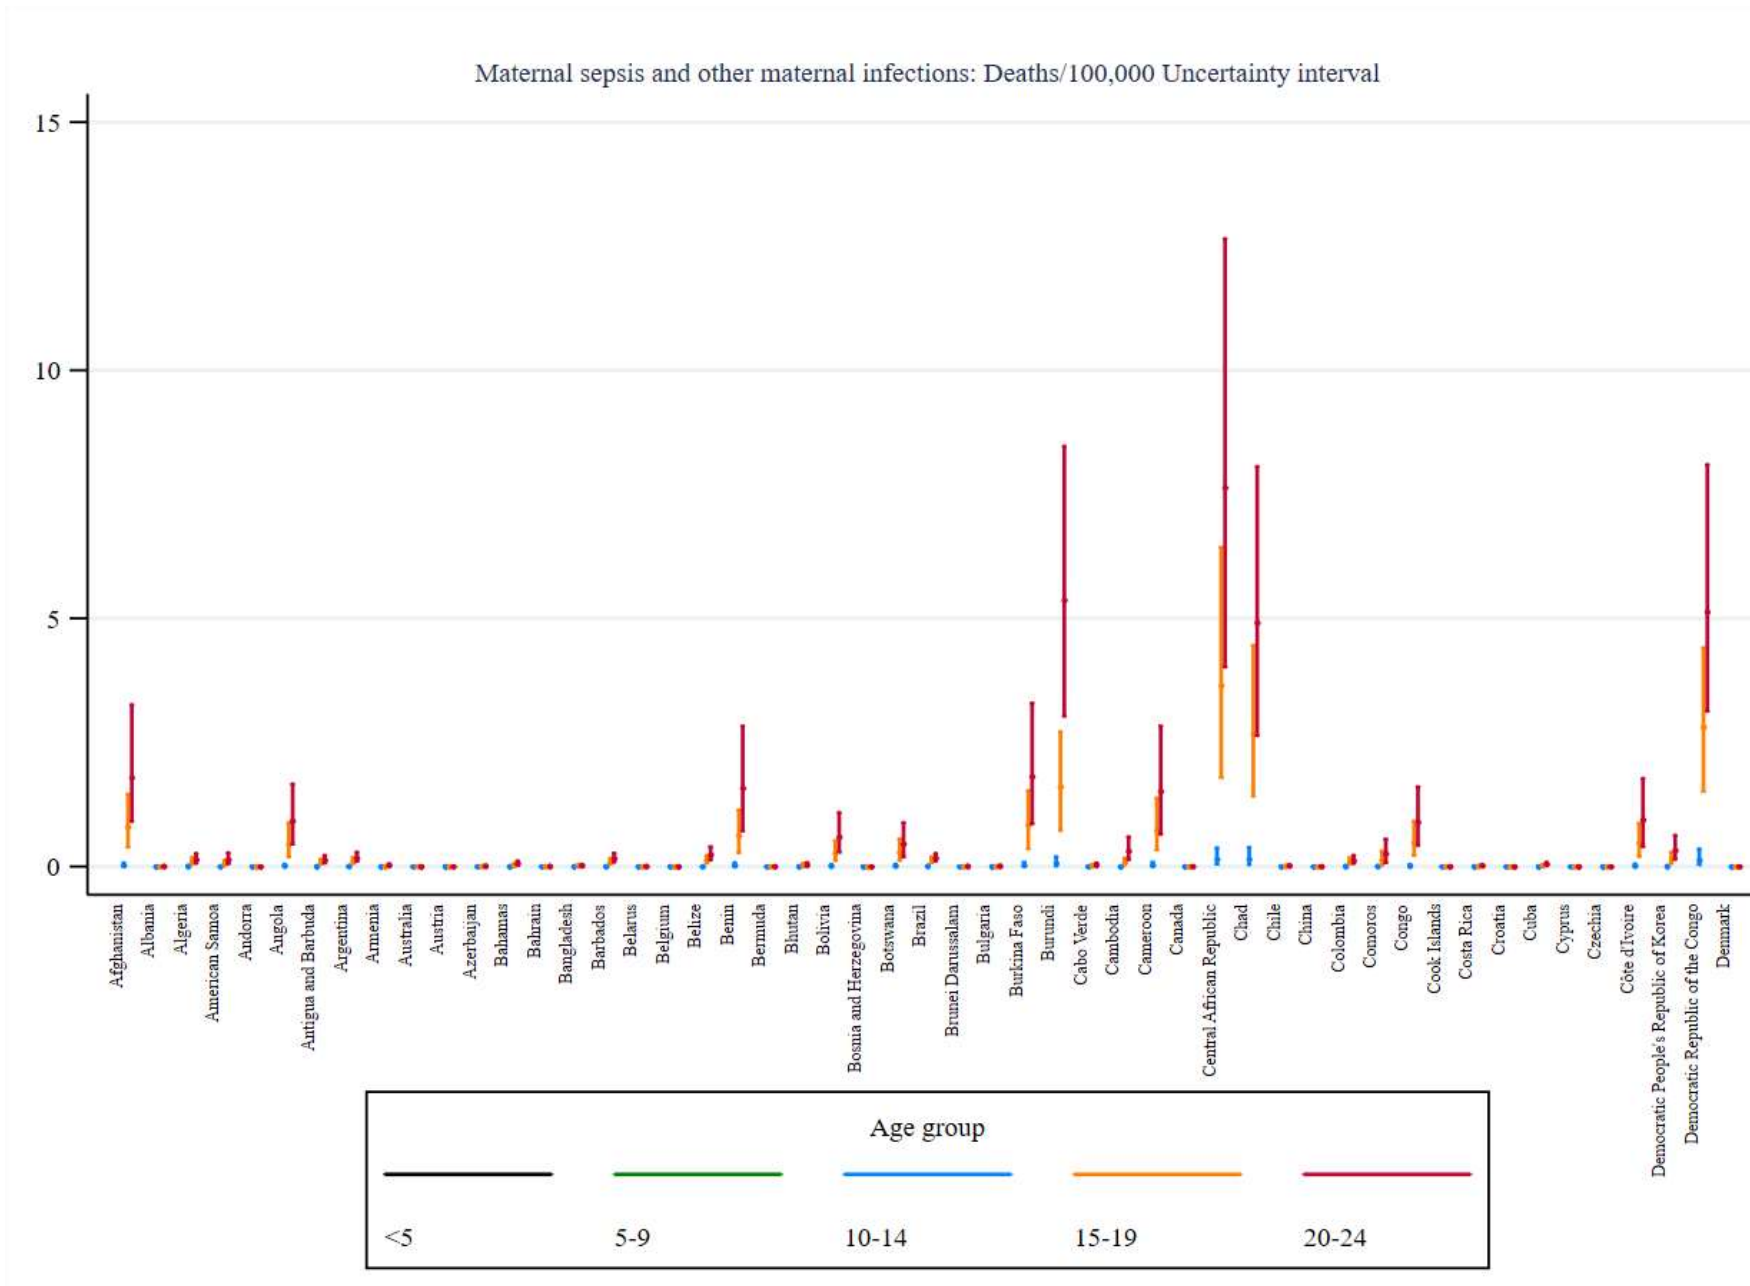

Maternal sepsis and other maternal infections: Deaths/100,000 Uncertainty interval

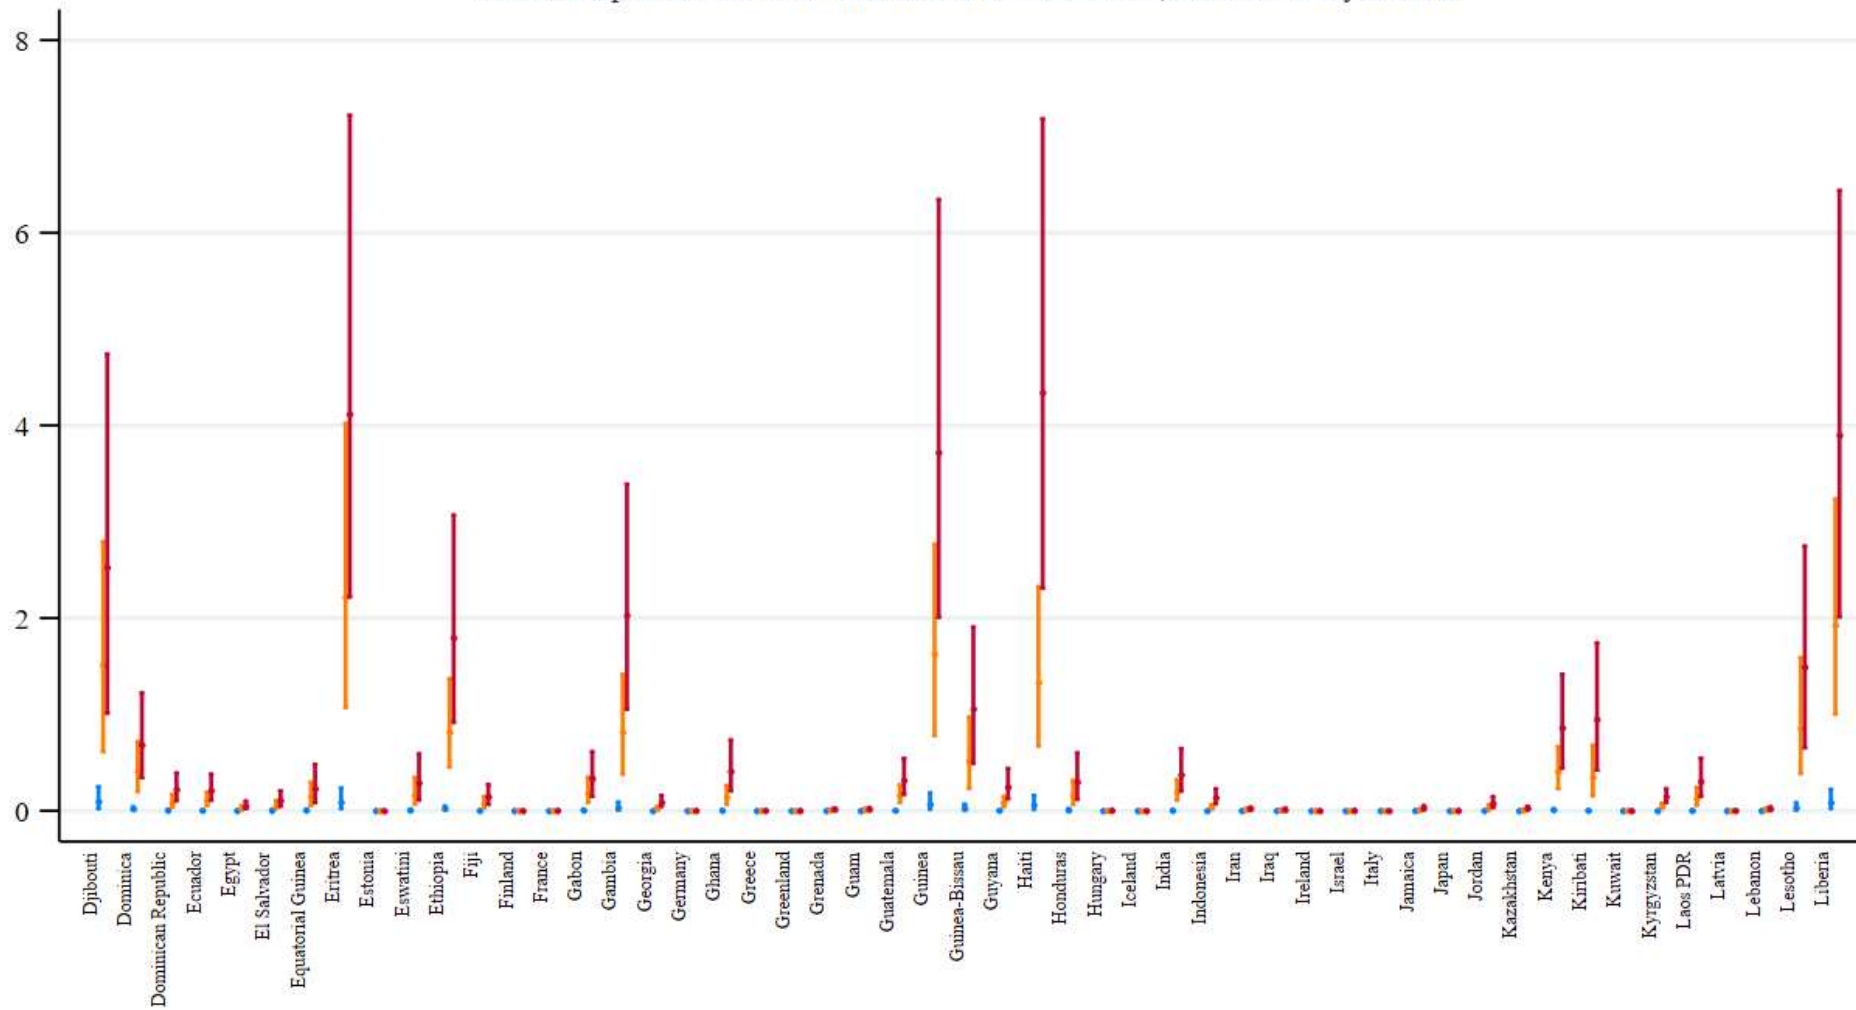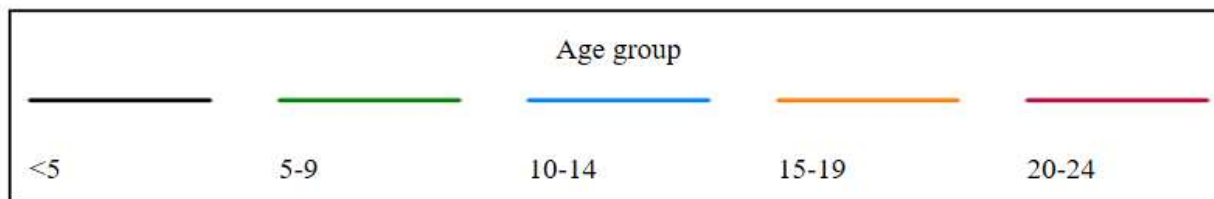

Maternal sepsis and other maternal infections: Deaths/100,000 Uncertainty interval

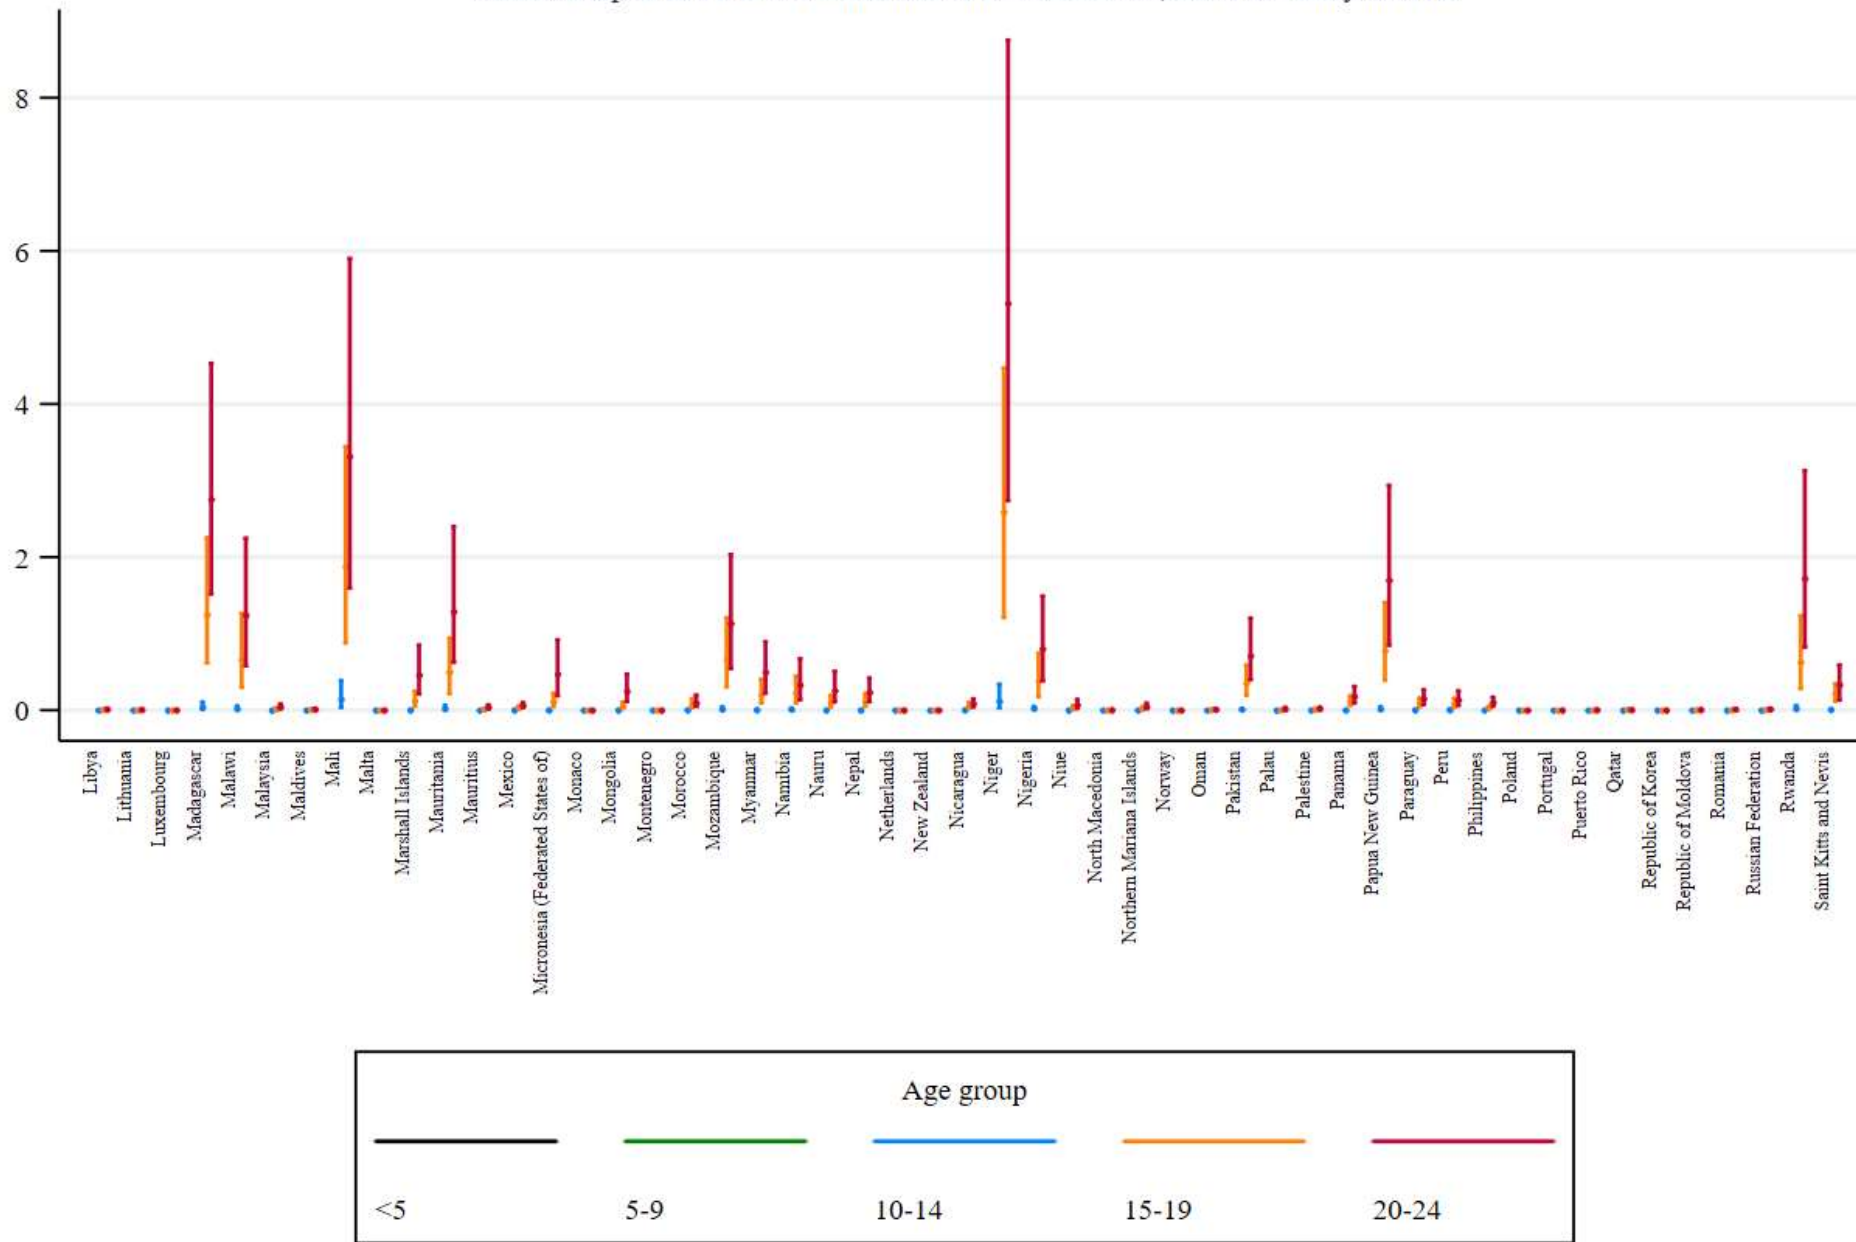

Maternal sepsis and other maternal infections: Deaths/100,000 Uncertainty interval

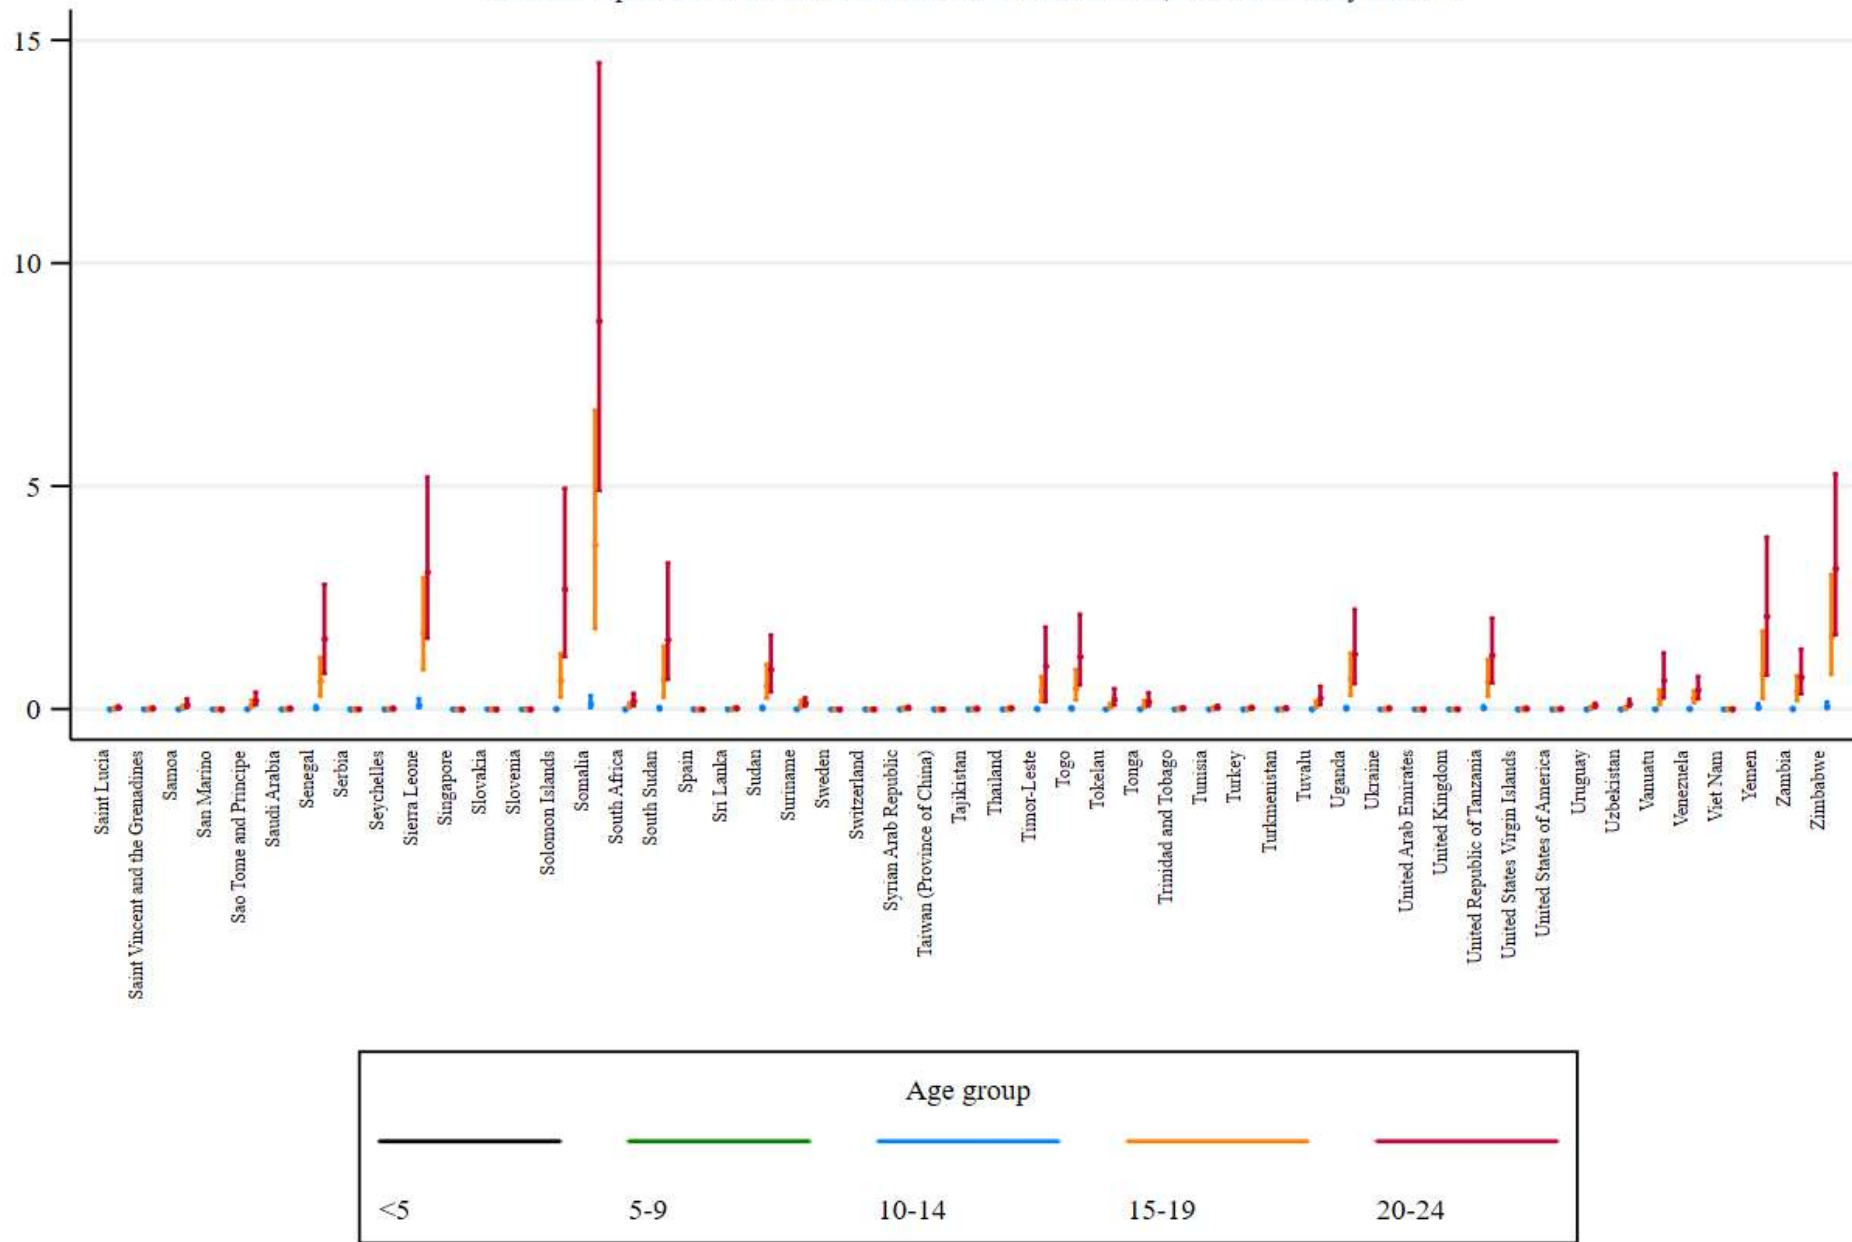

S20\_5 Part B: Maternal sepsis and other maternal infections DALYs/ 100 000 Uncertainty interval for each age group

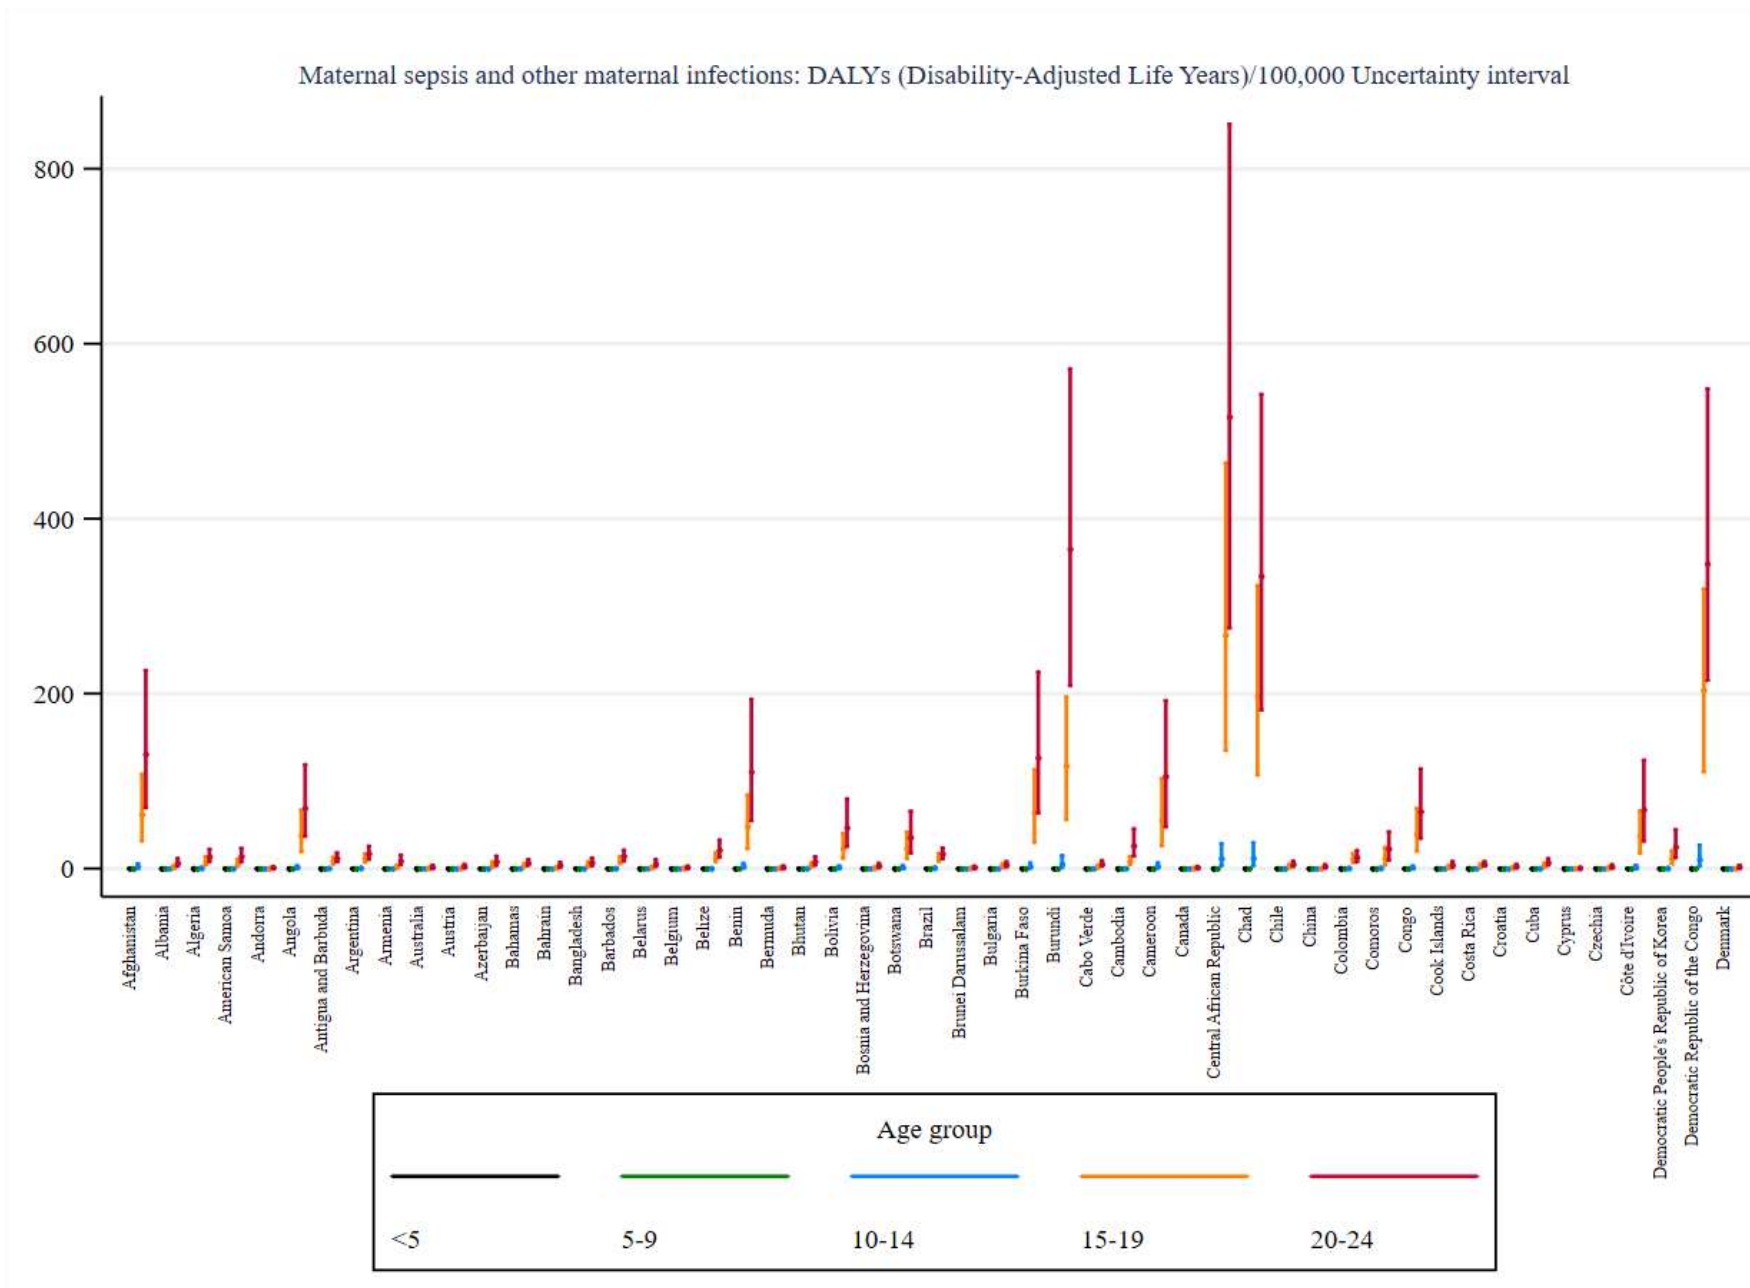

Maternal sepsis and other maternal infections: DALYs (Disability-Adjusted Life Years)/100,000 Uncertainty interval

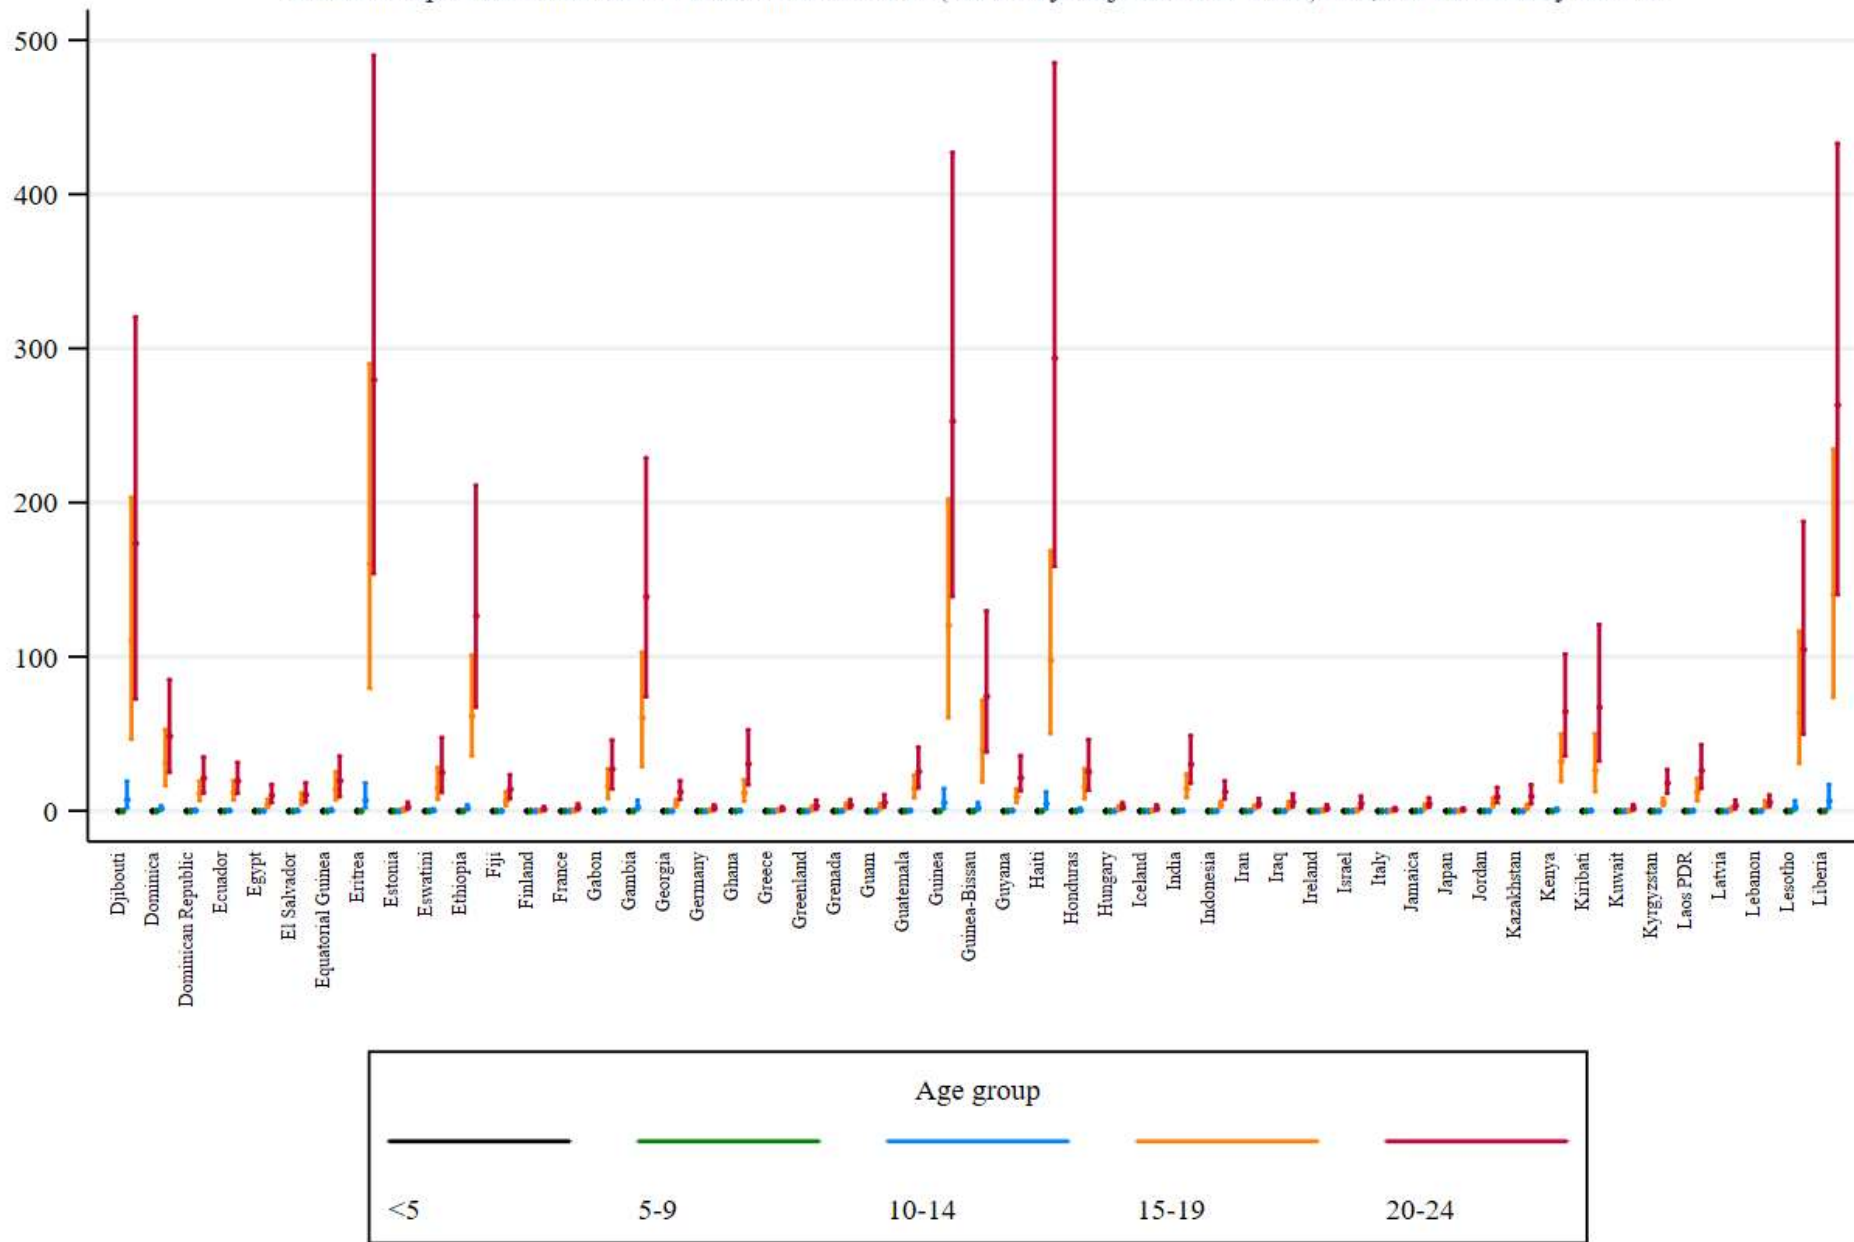



Maternal sepsis and other maternal infections: DALYs (Disability-Adjusted Life Years)/100,000 Uncertainty interval

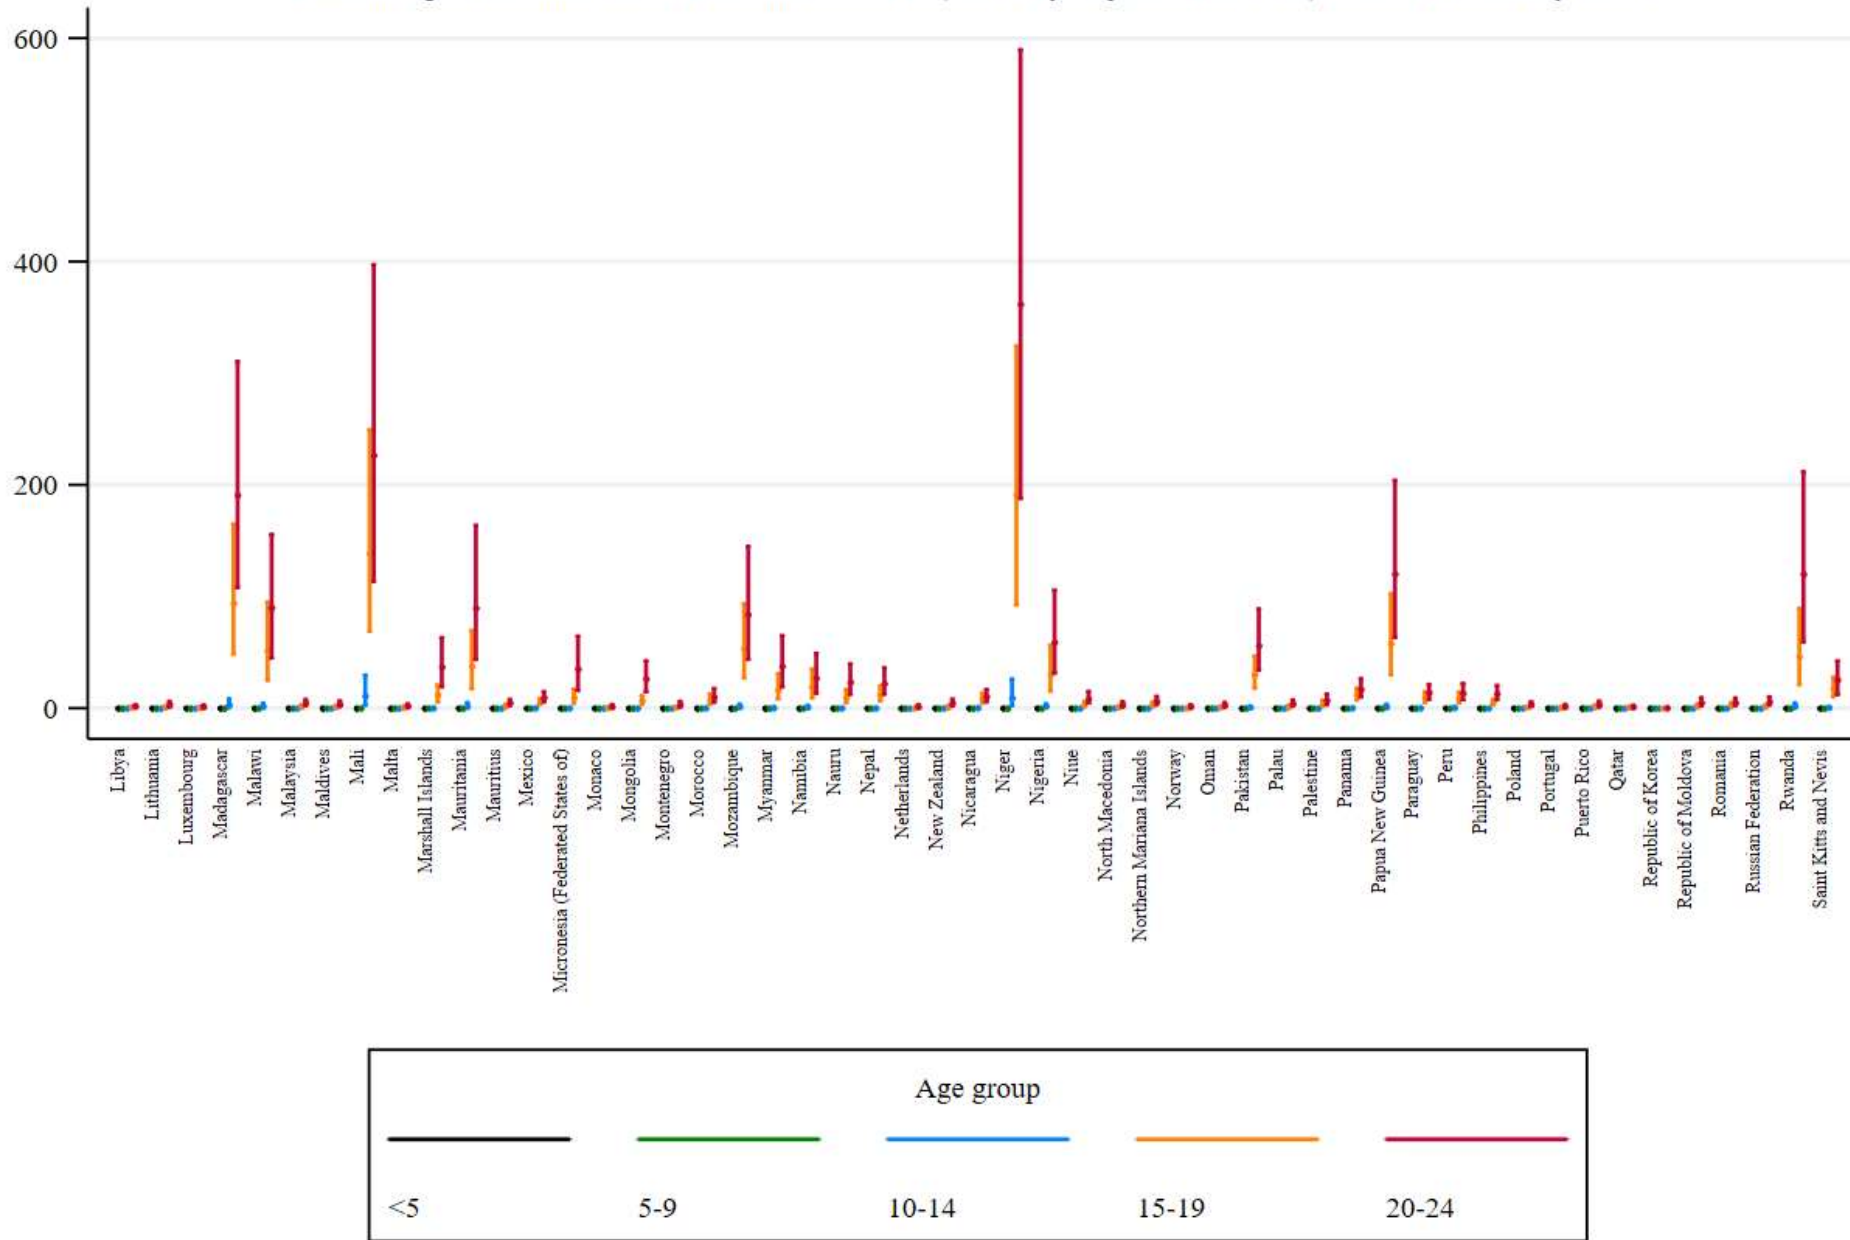

Maternal sepsis and other maternal infections: DALYs (Disability-Adjusted Life Years)/100,000 Uncertainty interval

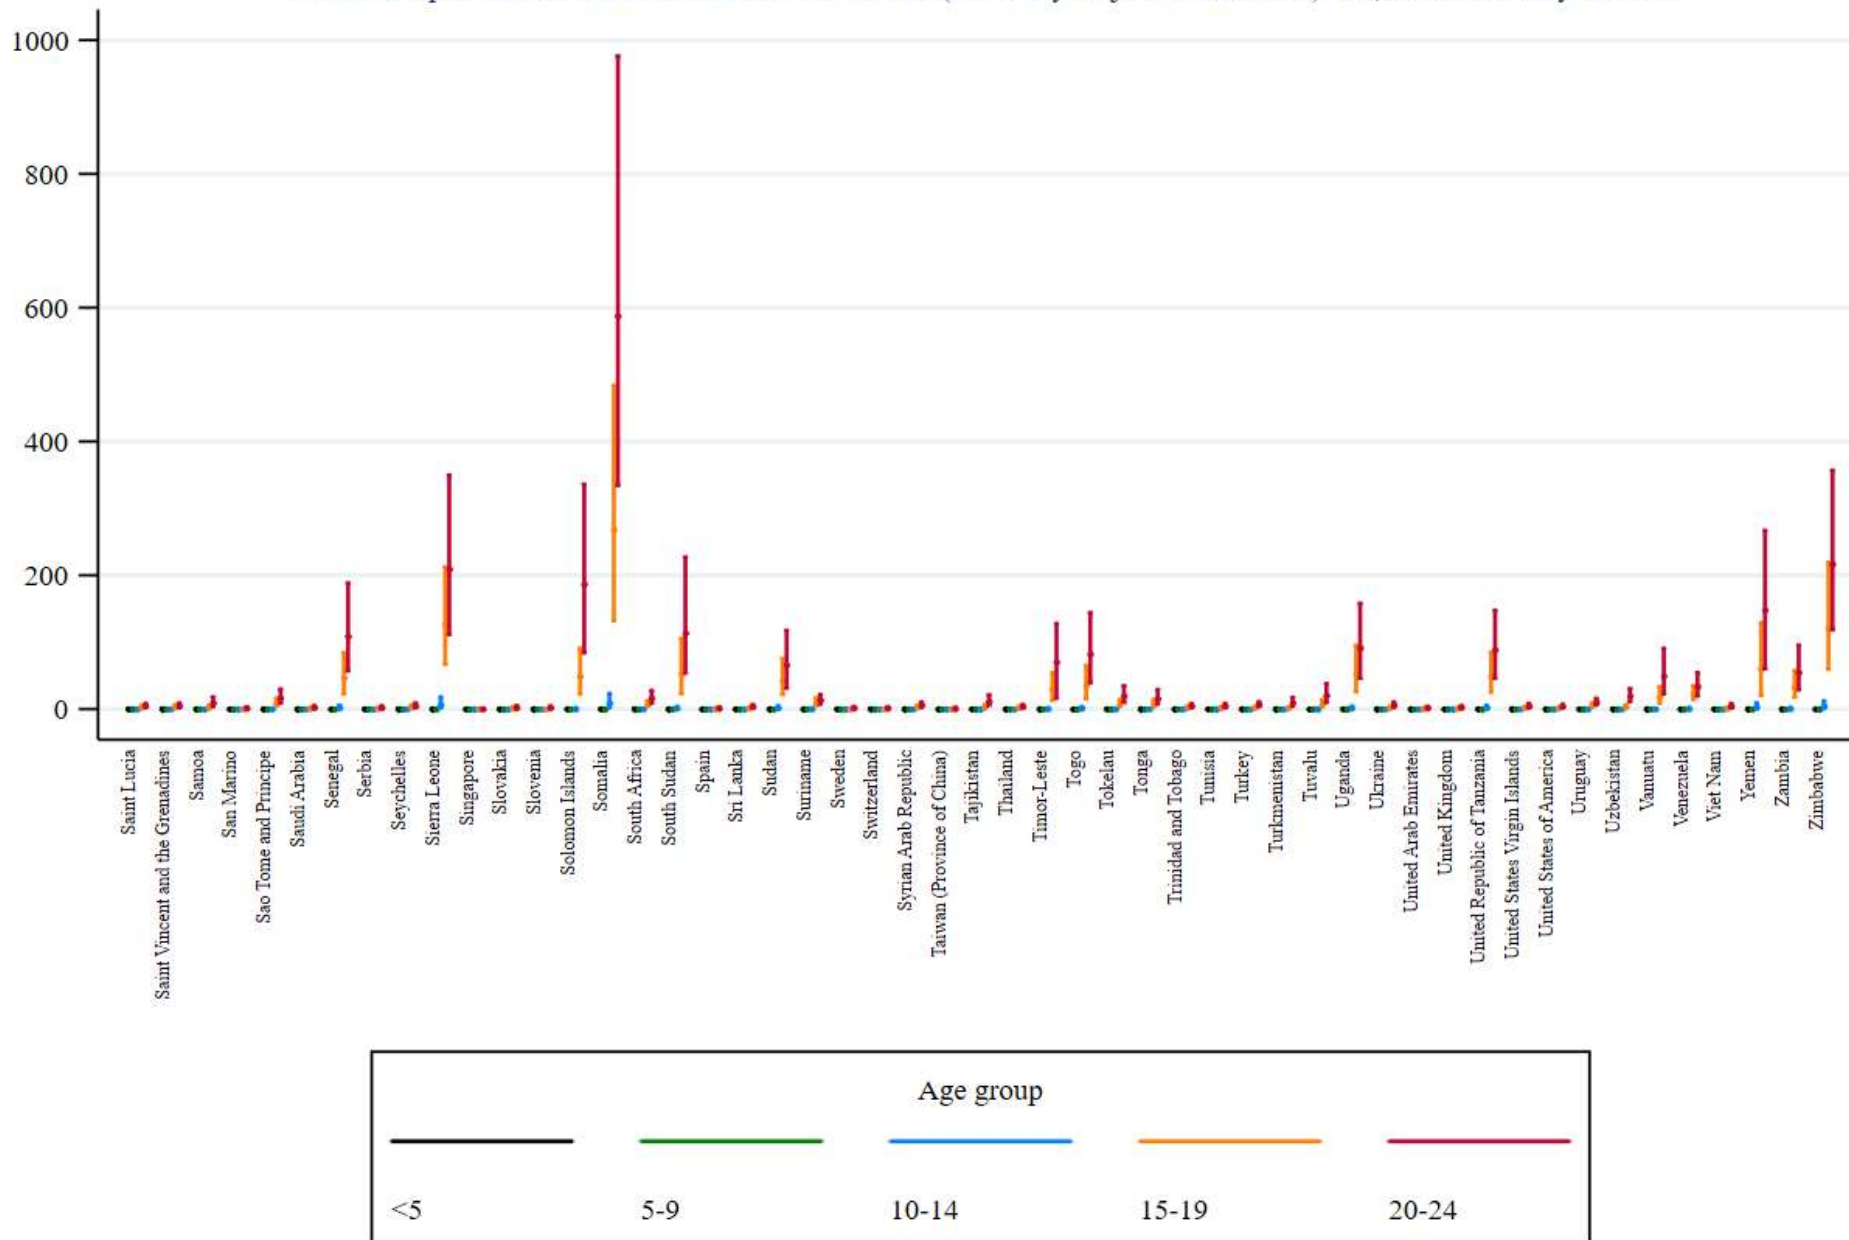

S20\_6 Part A: Neonatal sepsis and other neonatal infections Deaths/ 100 000 Uncertainty interval for each age group

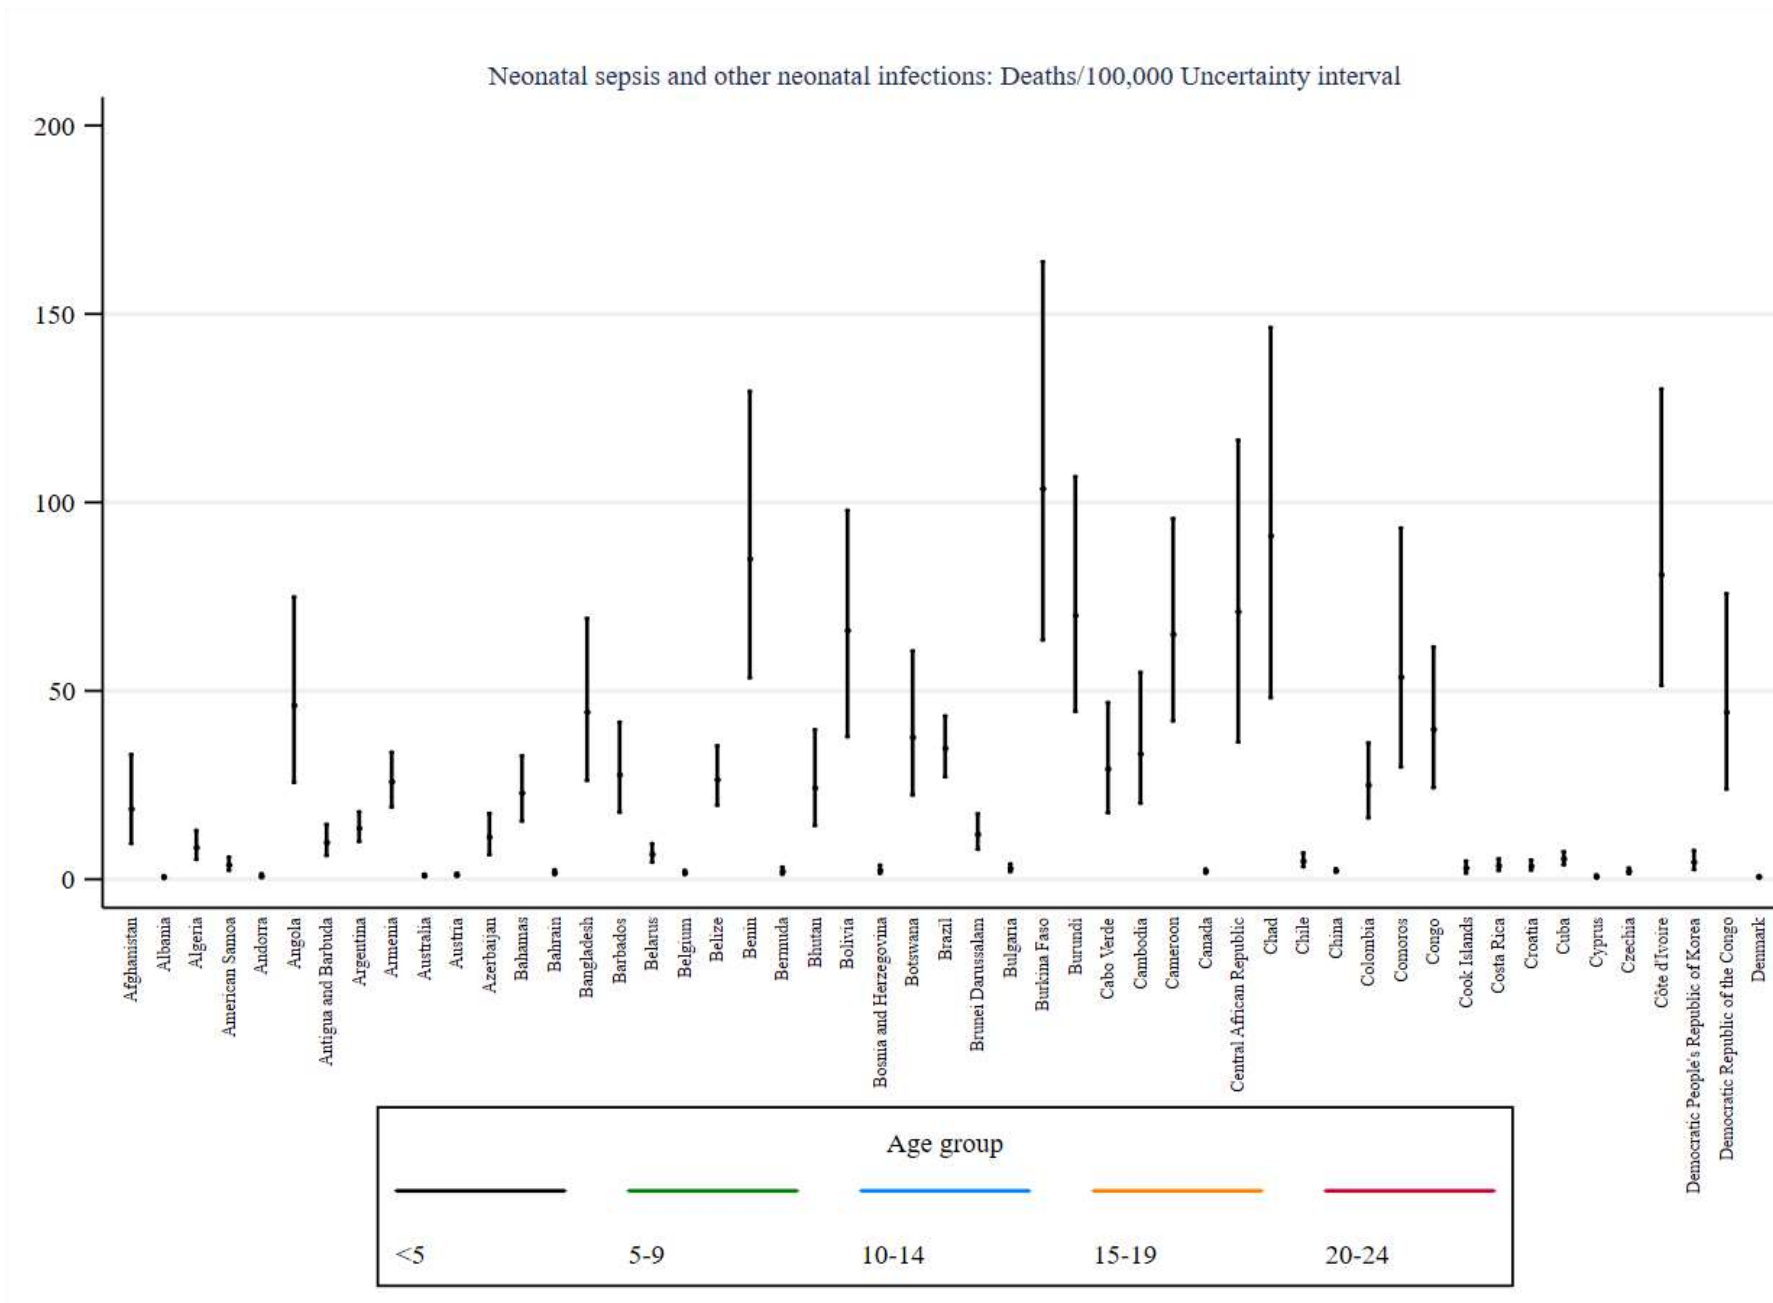

Neonatal sepsis and other neonatal infections: Deaths/100,000 Uncertainty interval

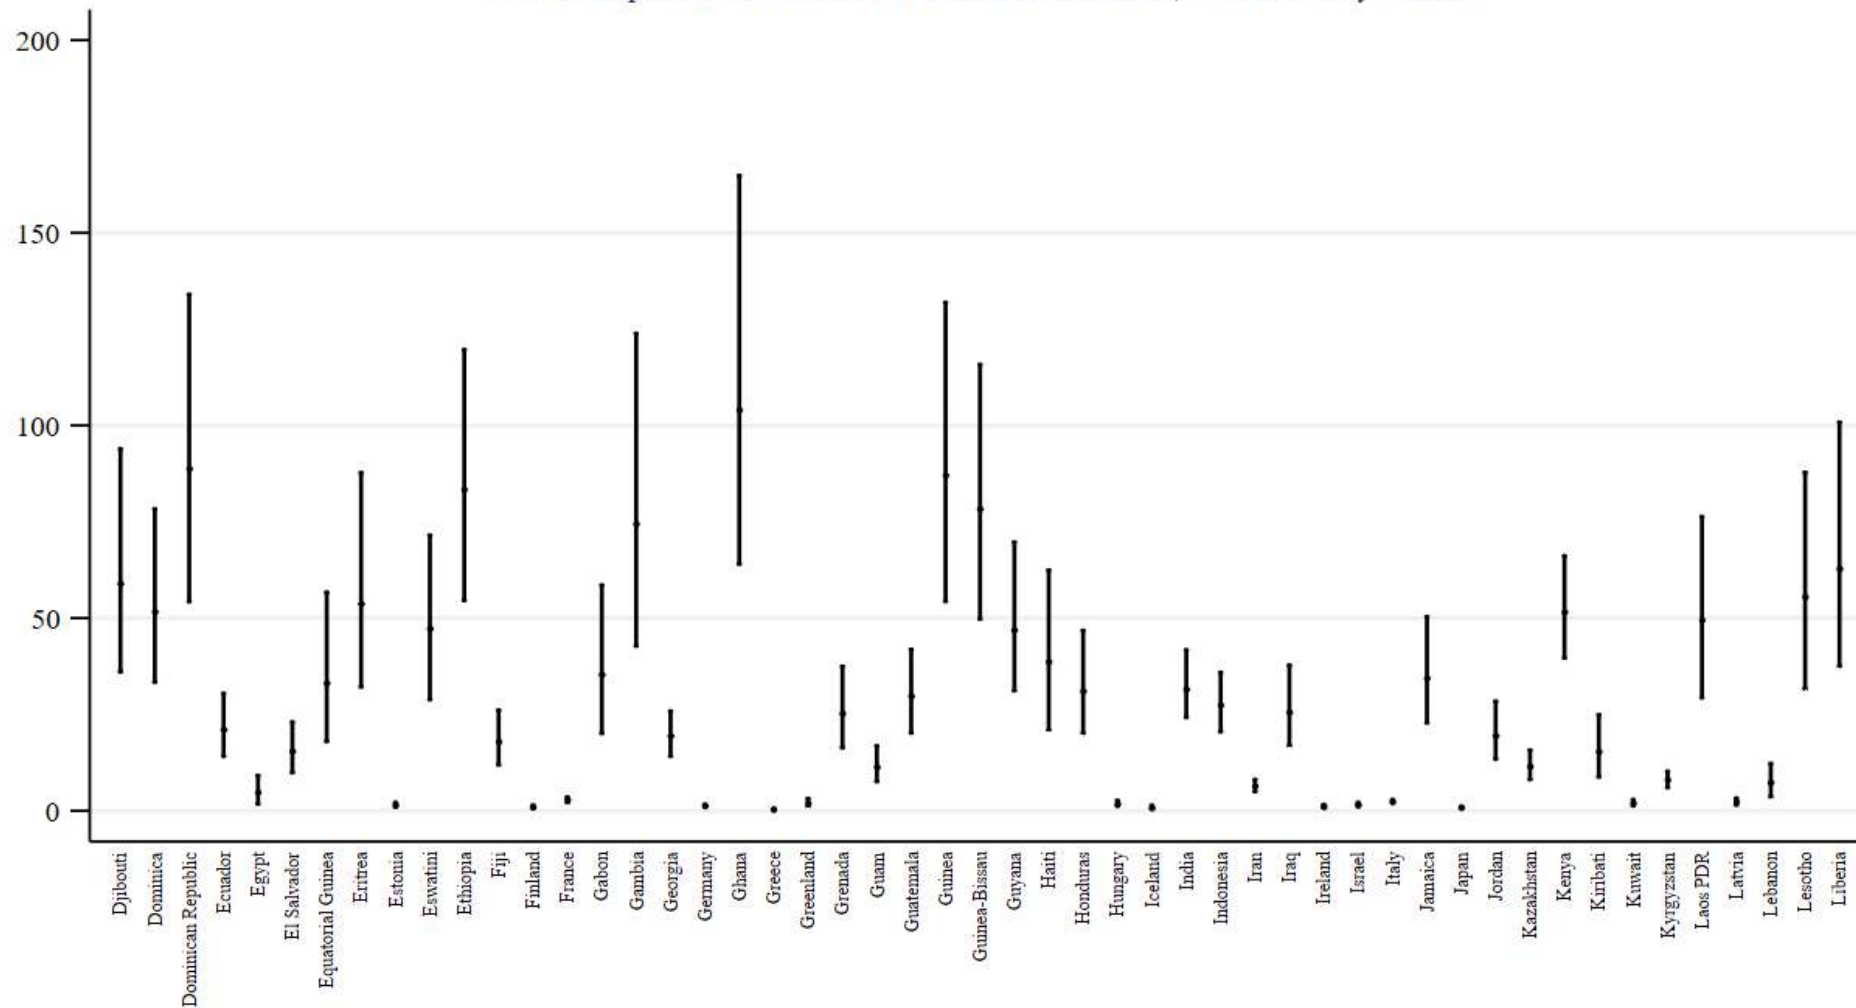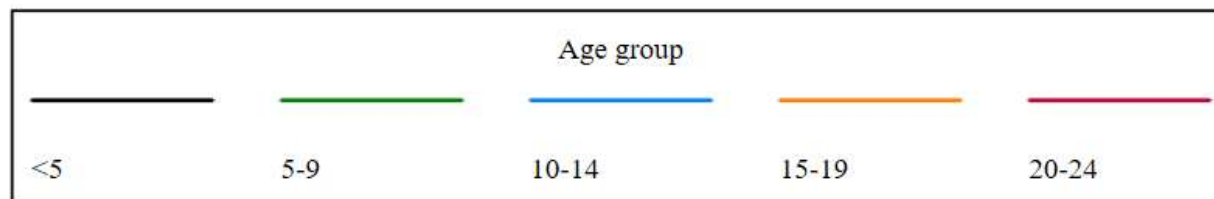

Neonatal sepsis and other neonatal infections: Deaths/100,000 Uncertainty interval

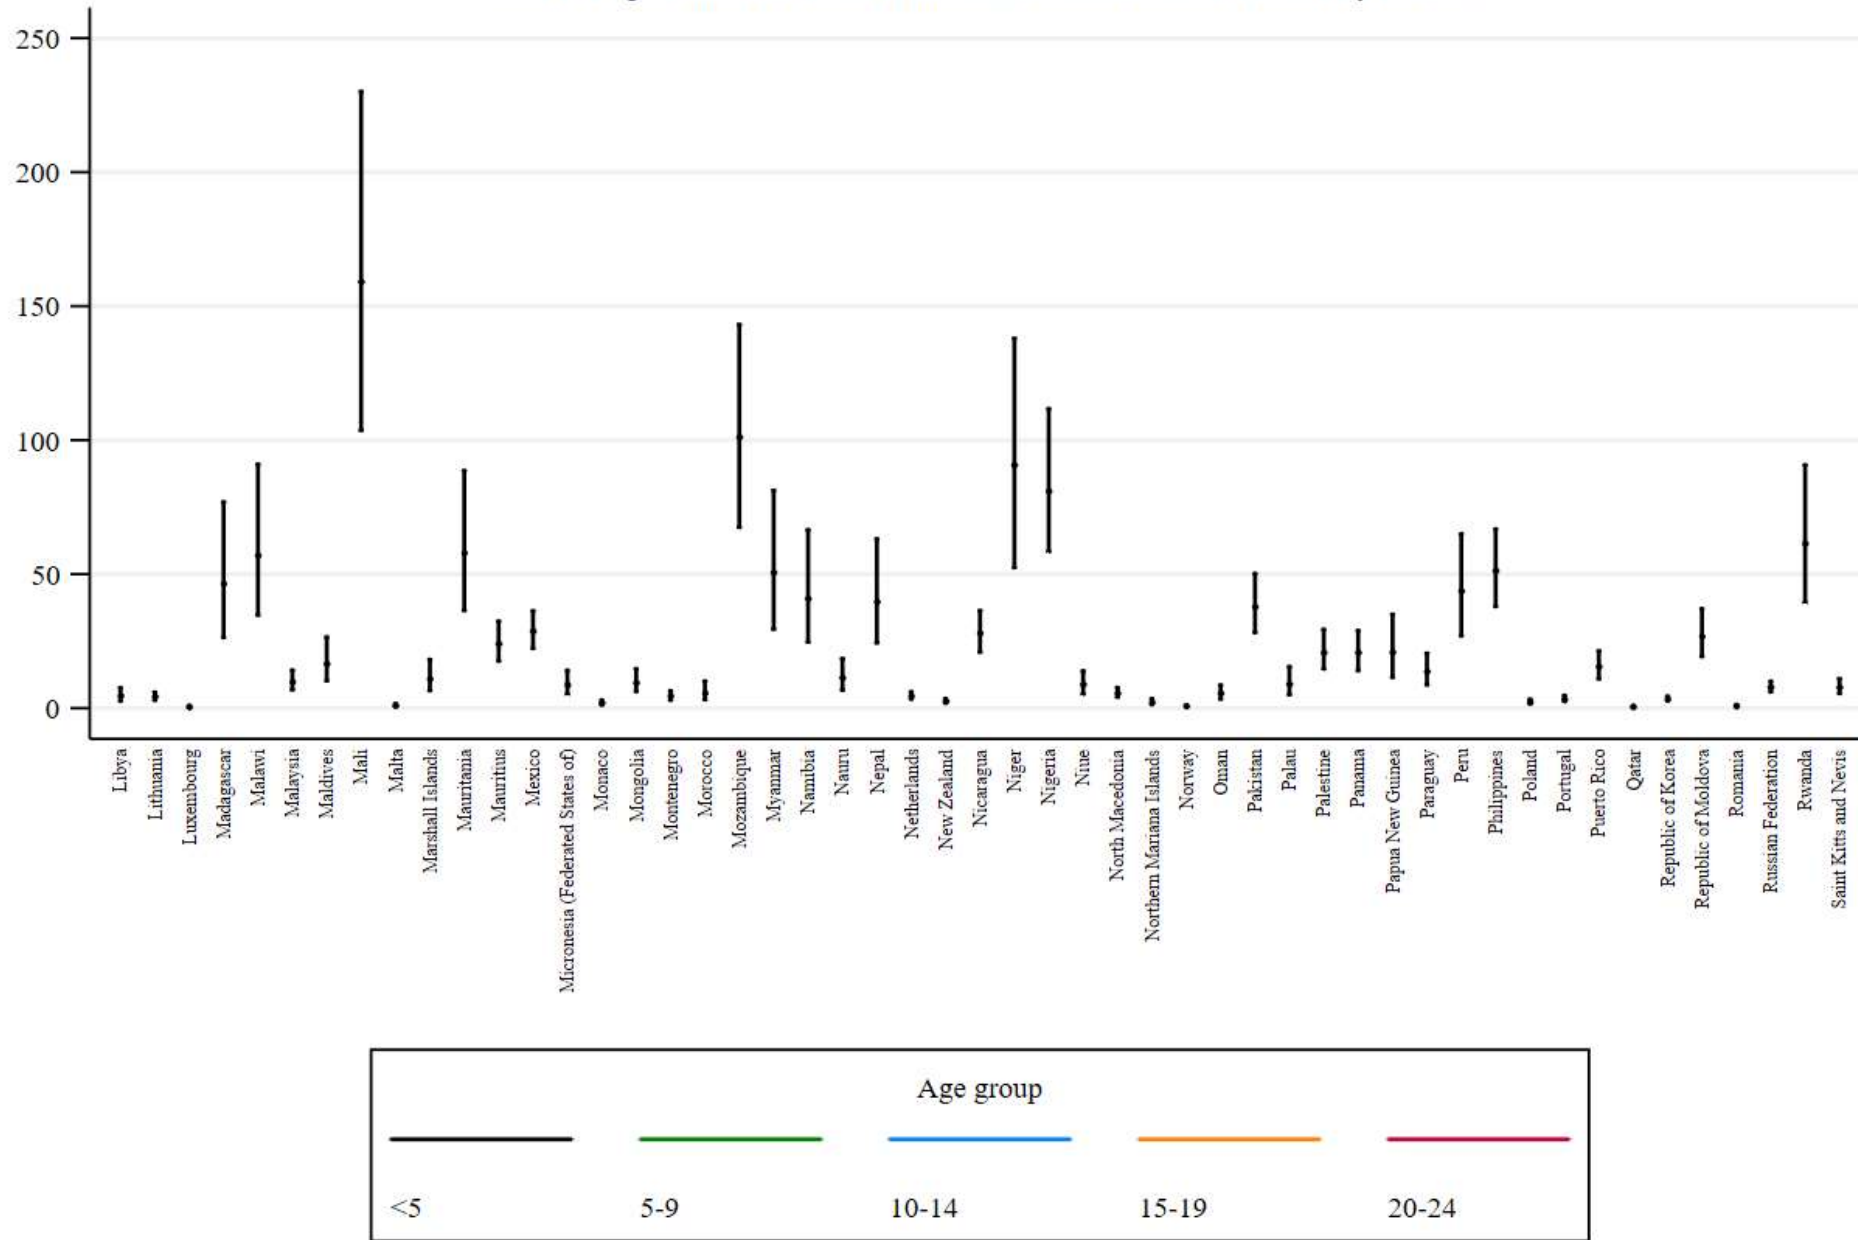

Neonatal sepsis and other neonatal infections: Deaths/100,000 Uncertainty interval

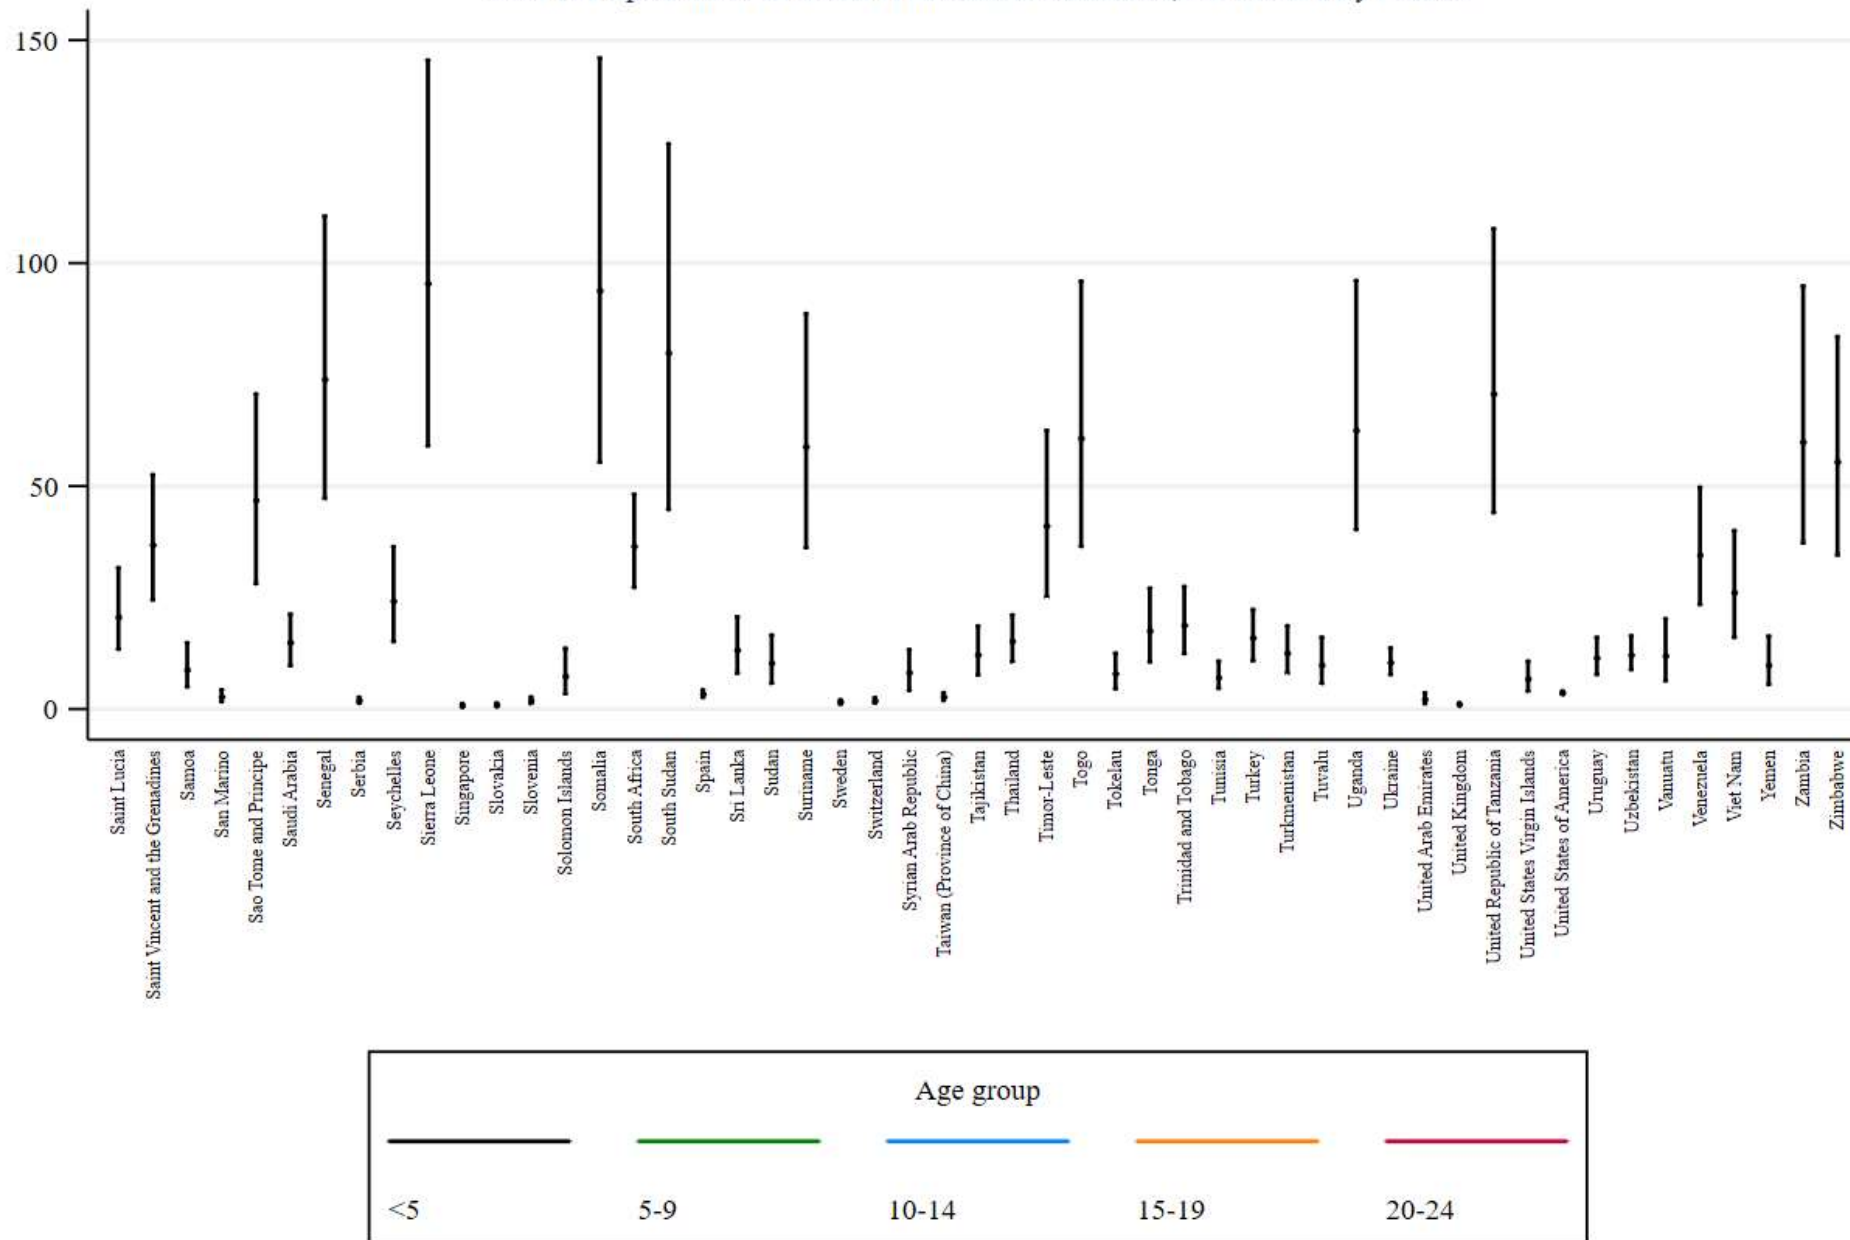

S20\_6 Part B: Neonatal sepsis and other neonatal infections DALYs/ 100 000 Uncertainty interval for each age group

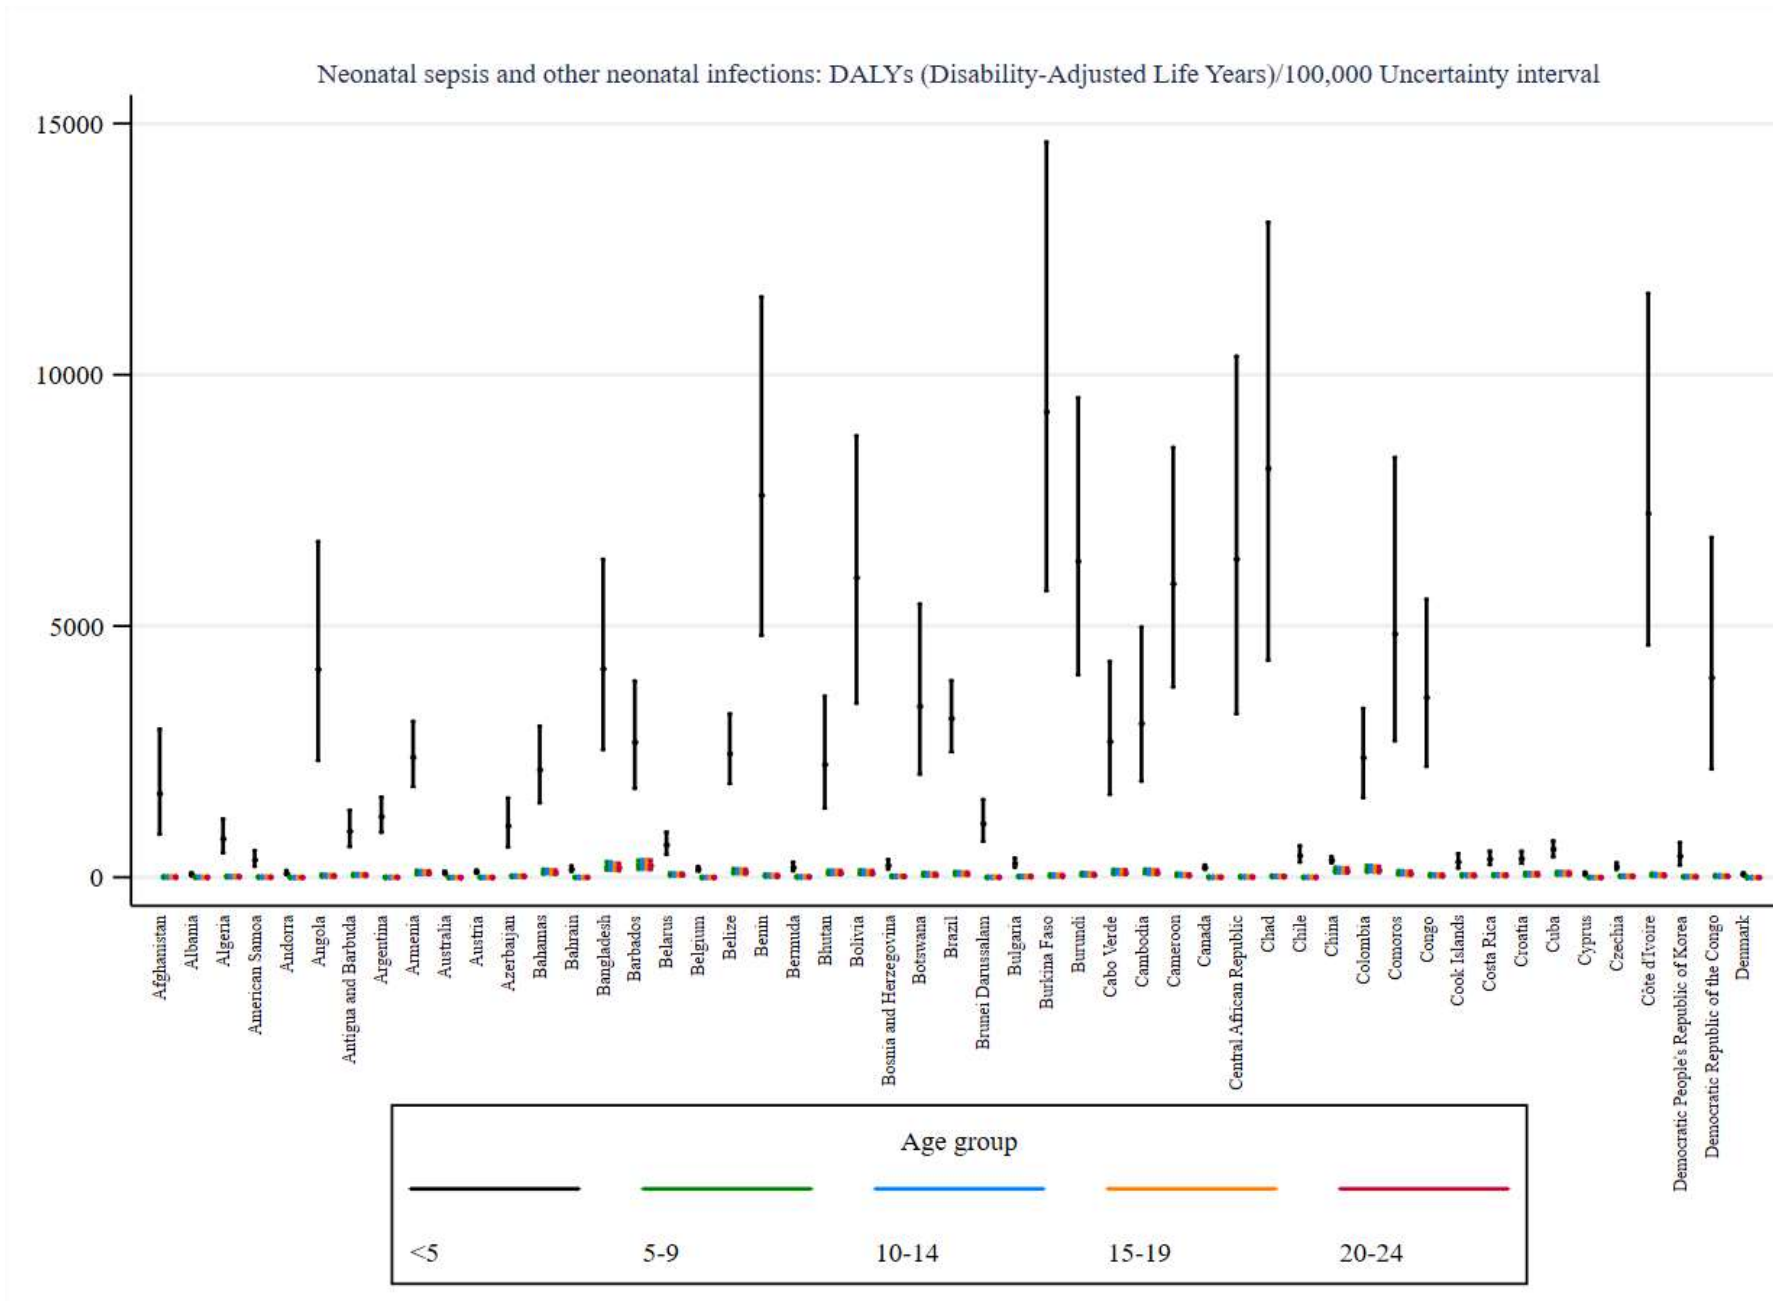

Neonatal sepsis and other neonatal infections: DALYs (Disability-Adjusted Life Years)/100,000 Uncertainty interval

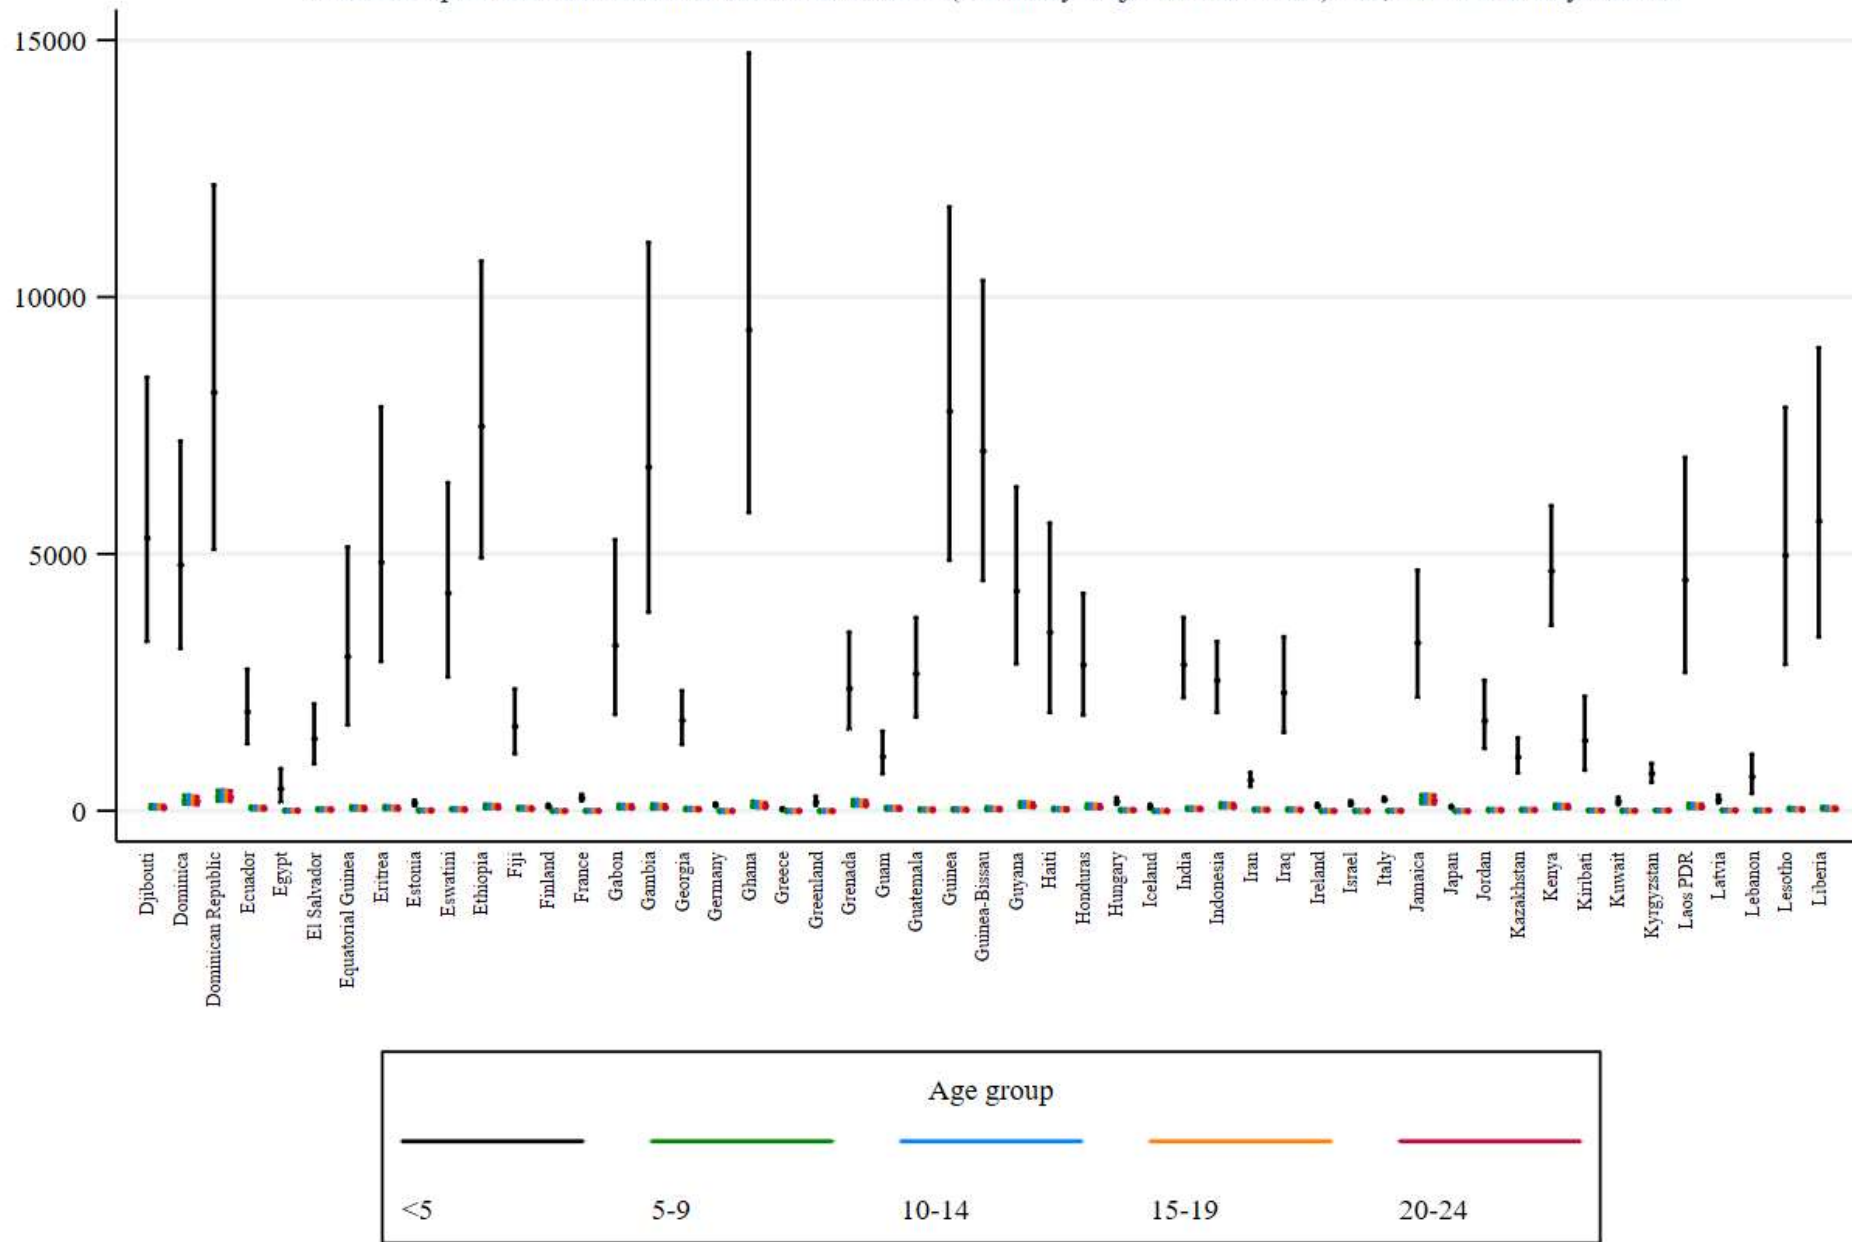



Neonatal sepsis and other neonatal infections: DALYs (Disability-Adjusted Life Years)/100,000 Uncertainty interval

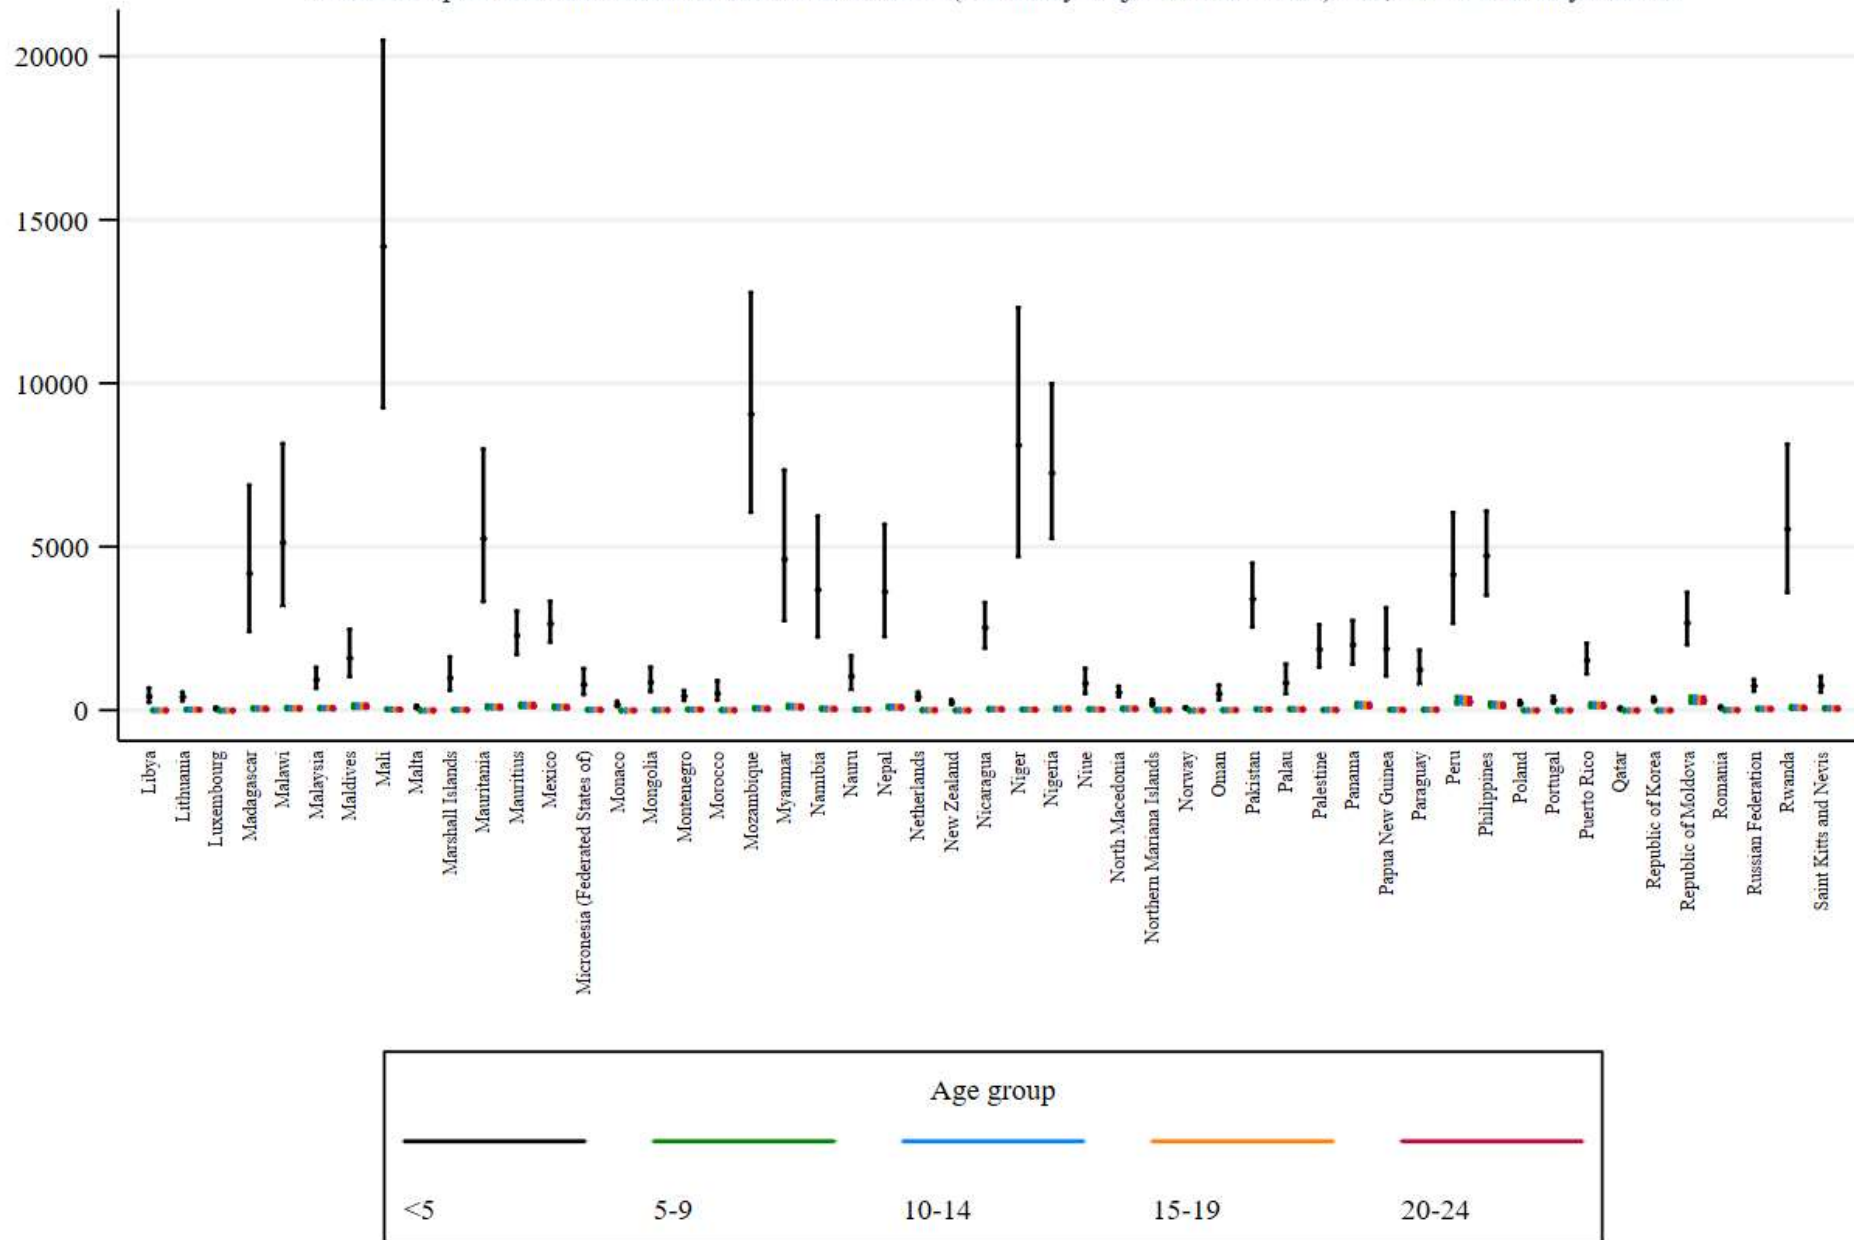

Neonatal sepsis and other neonatal infections: DALYs (Disability-Adjusted Life Years)/100,000 Uncertainty interval

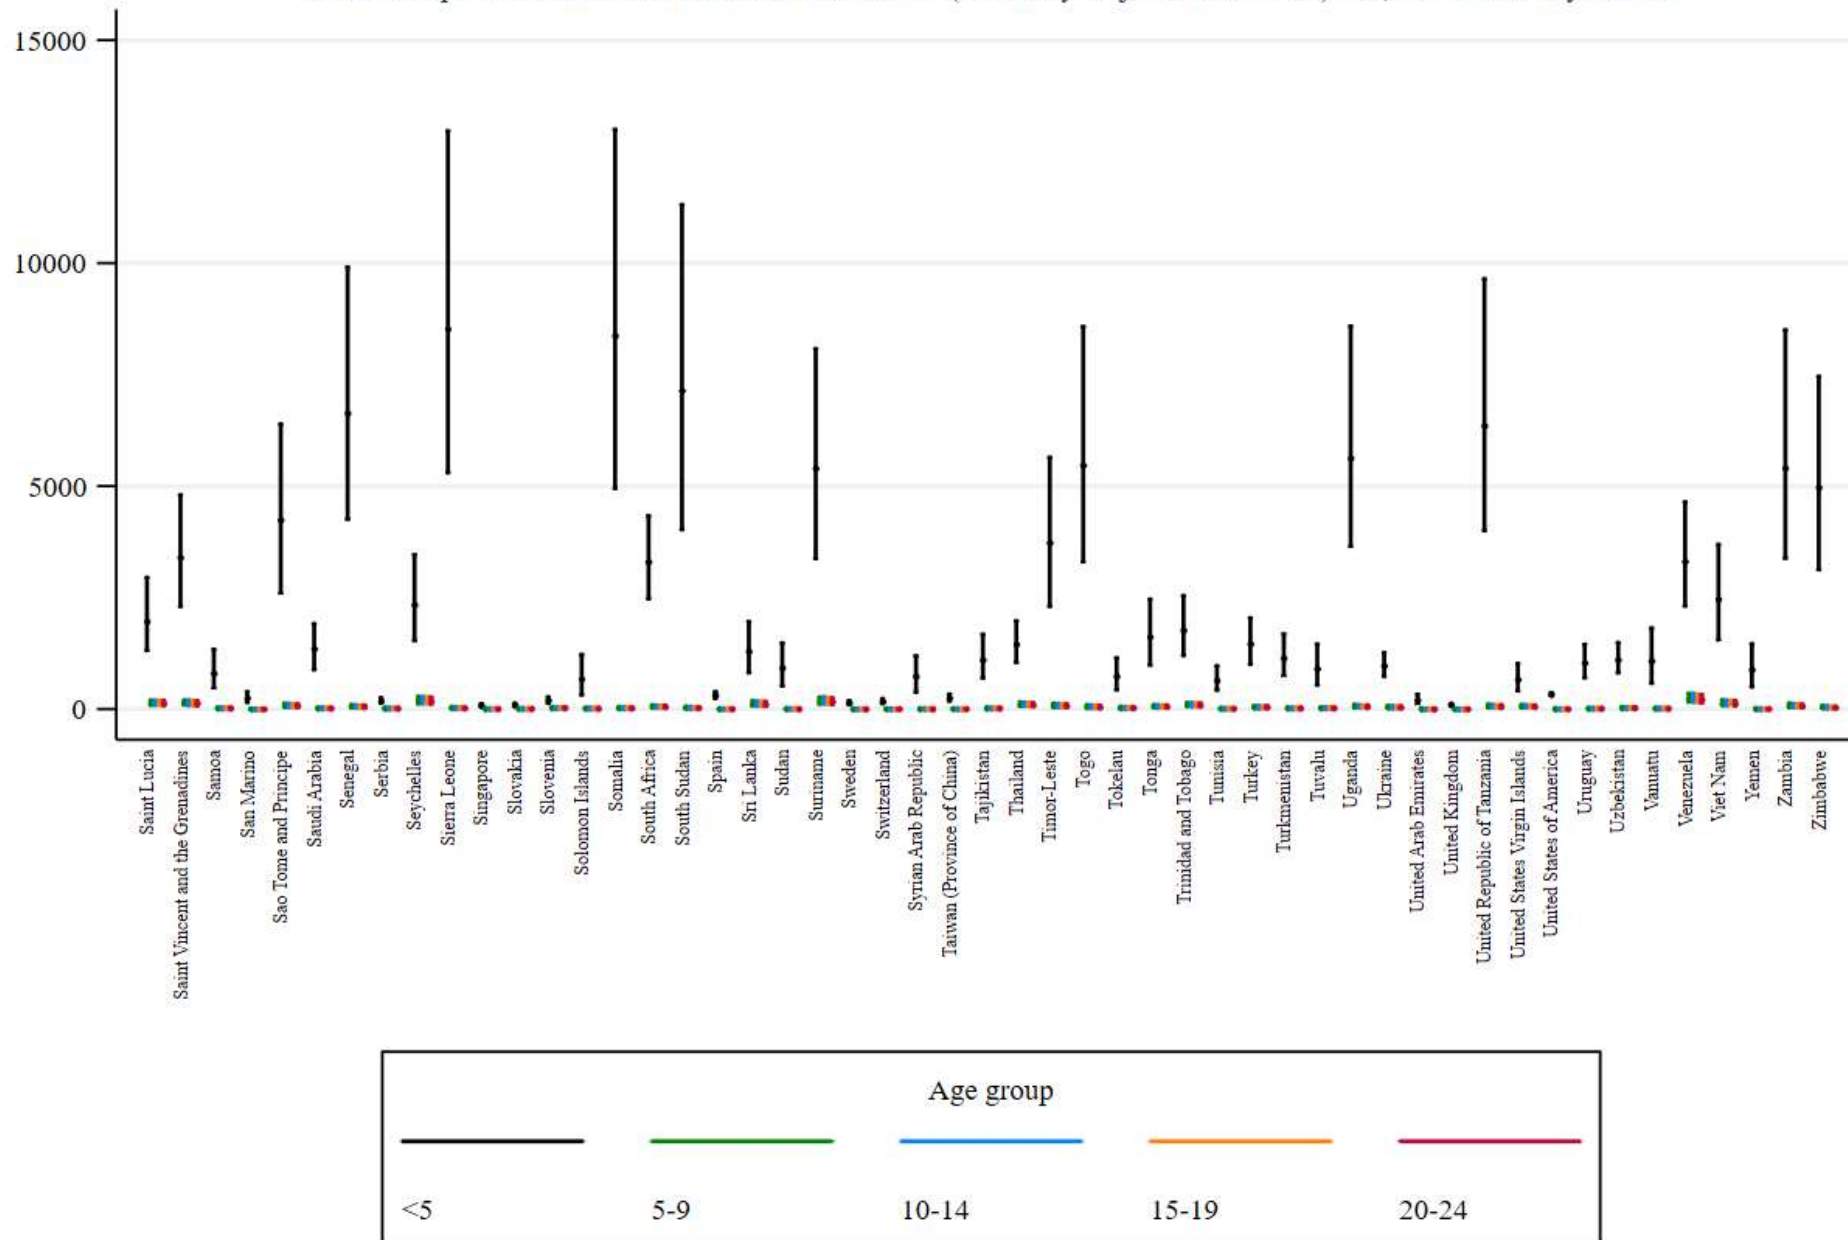

S20\_7 Part A: Other unspecified infectious diseases Deaths/ 100 000 Uncertainty interval for each age group

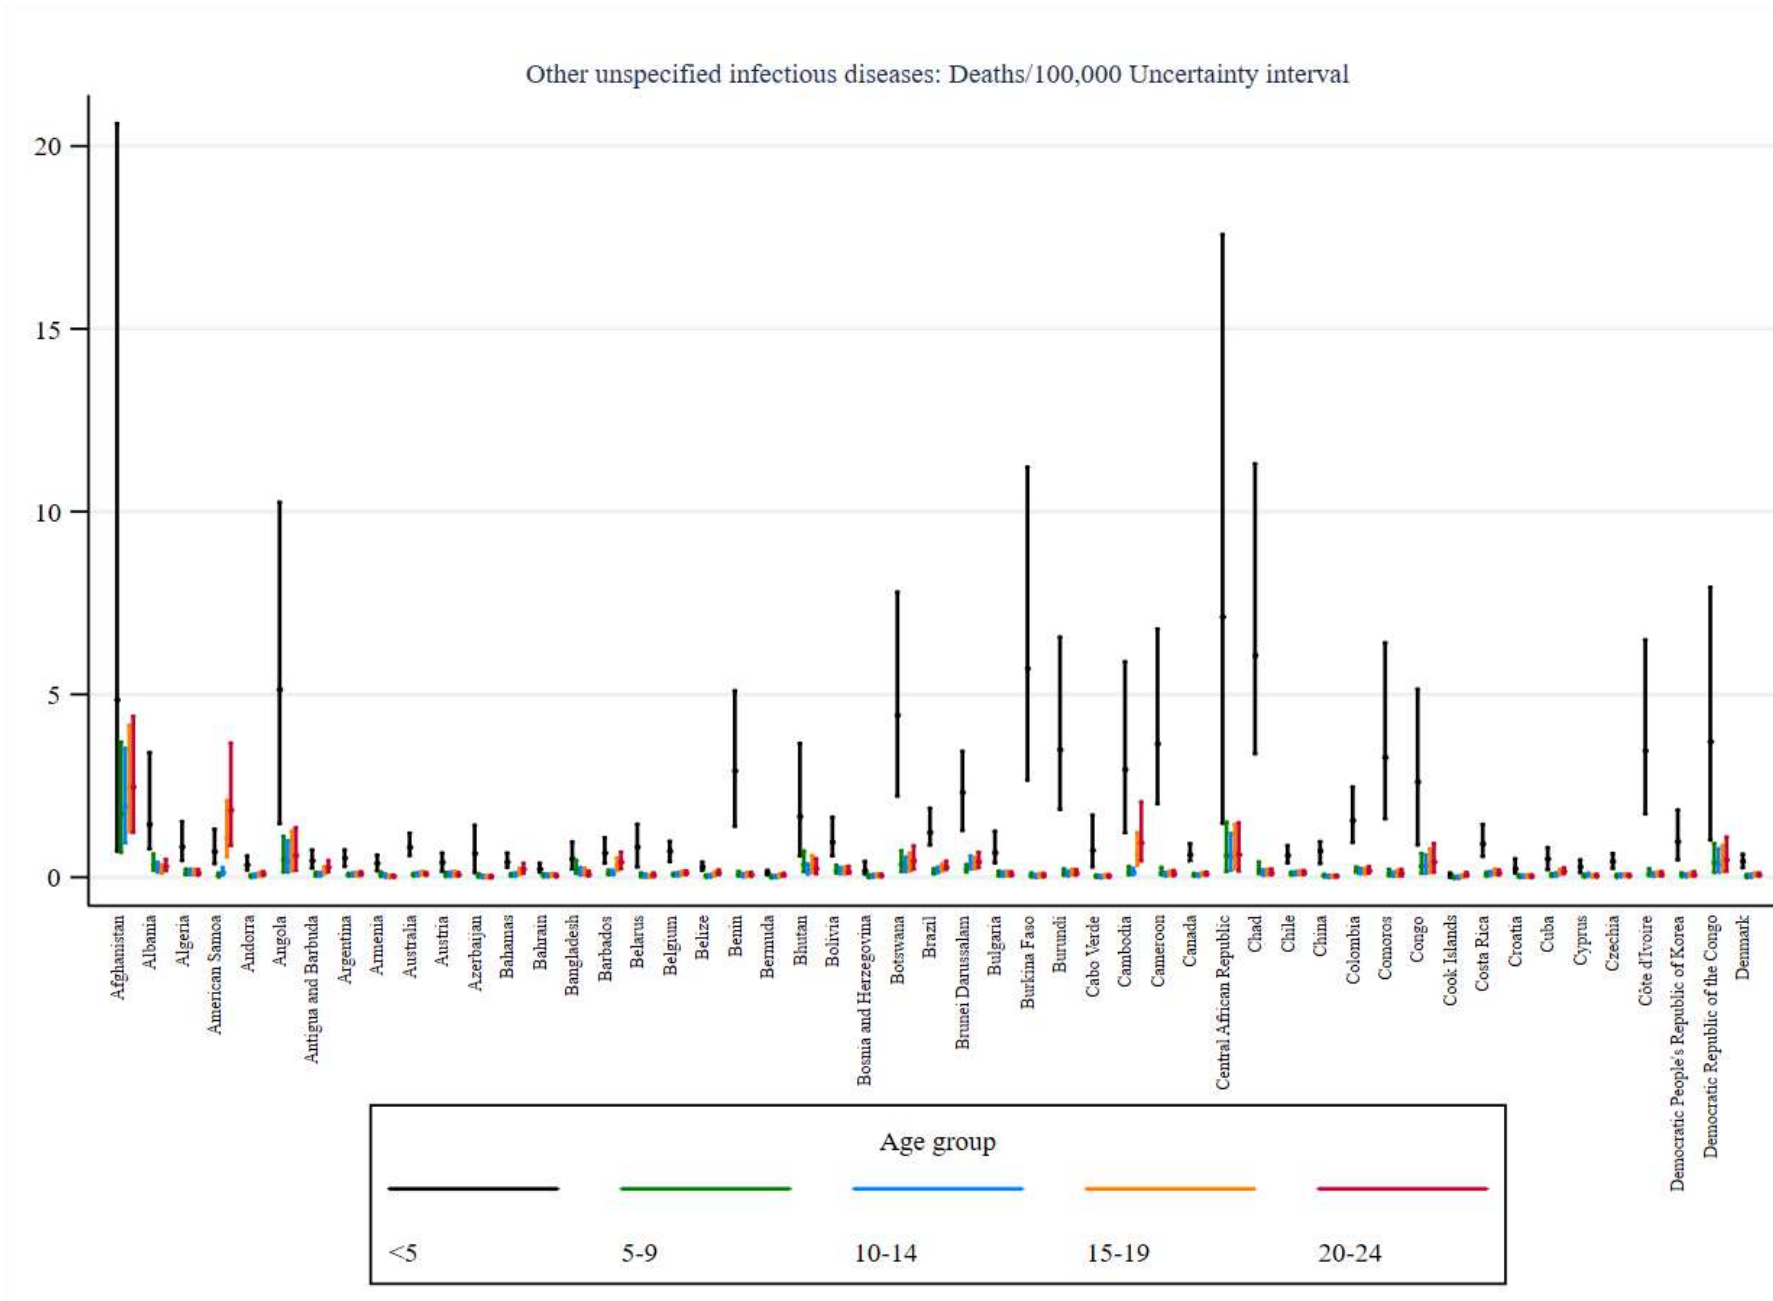

Other unspecified infectious diseases: Deaths/100,000 Uncertainty interval

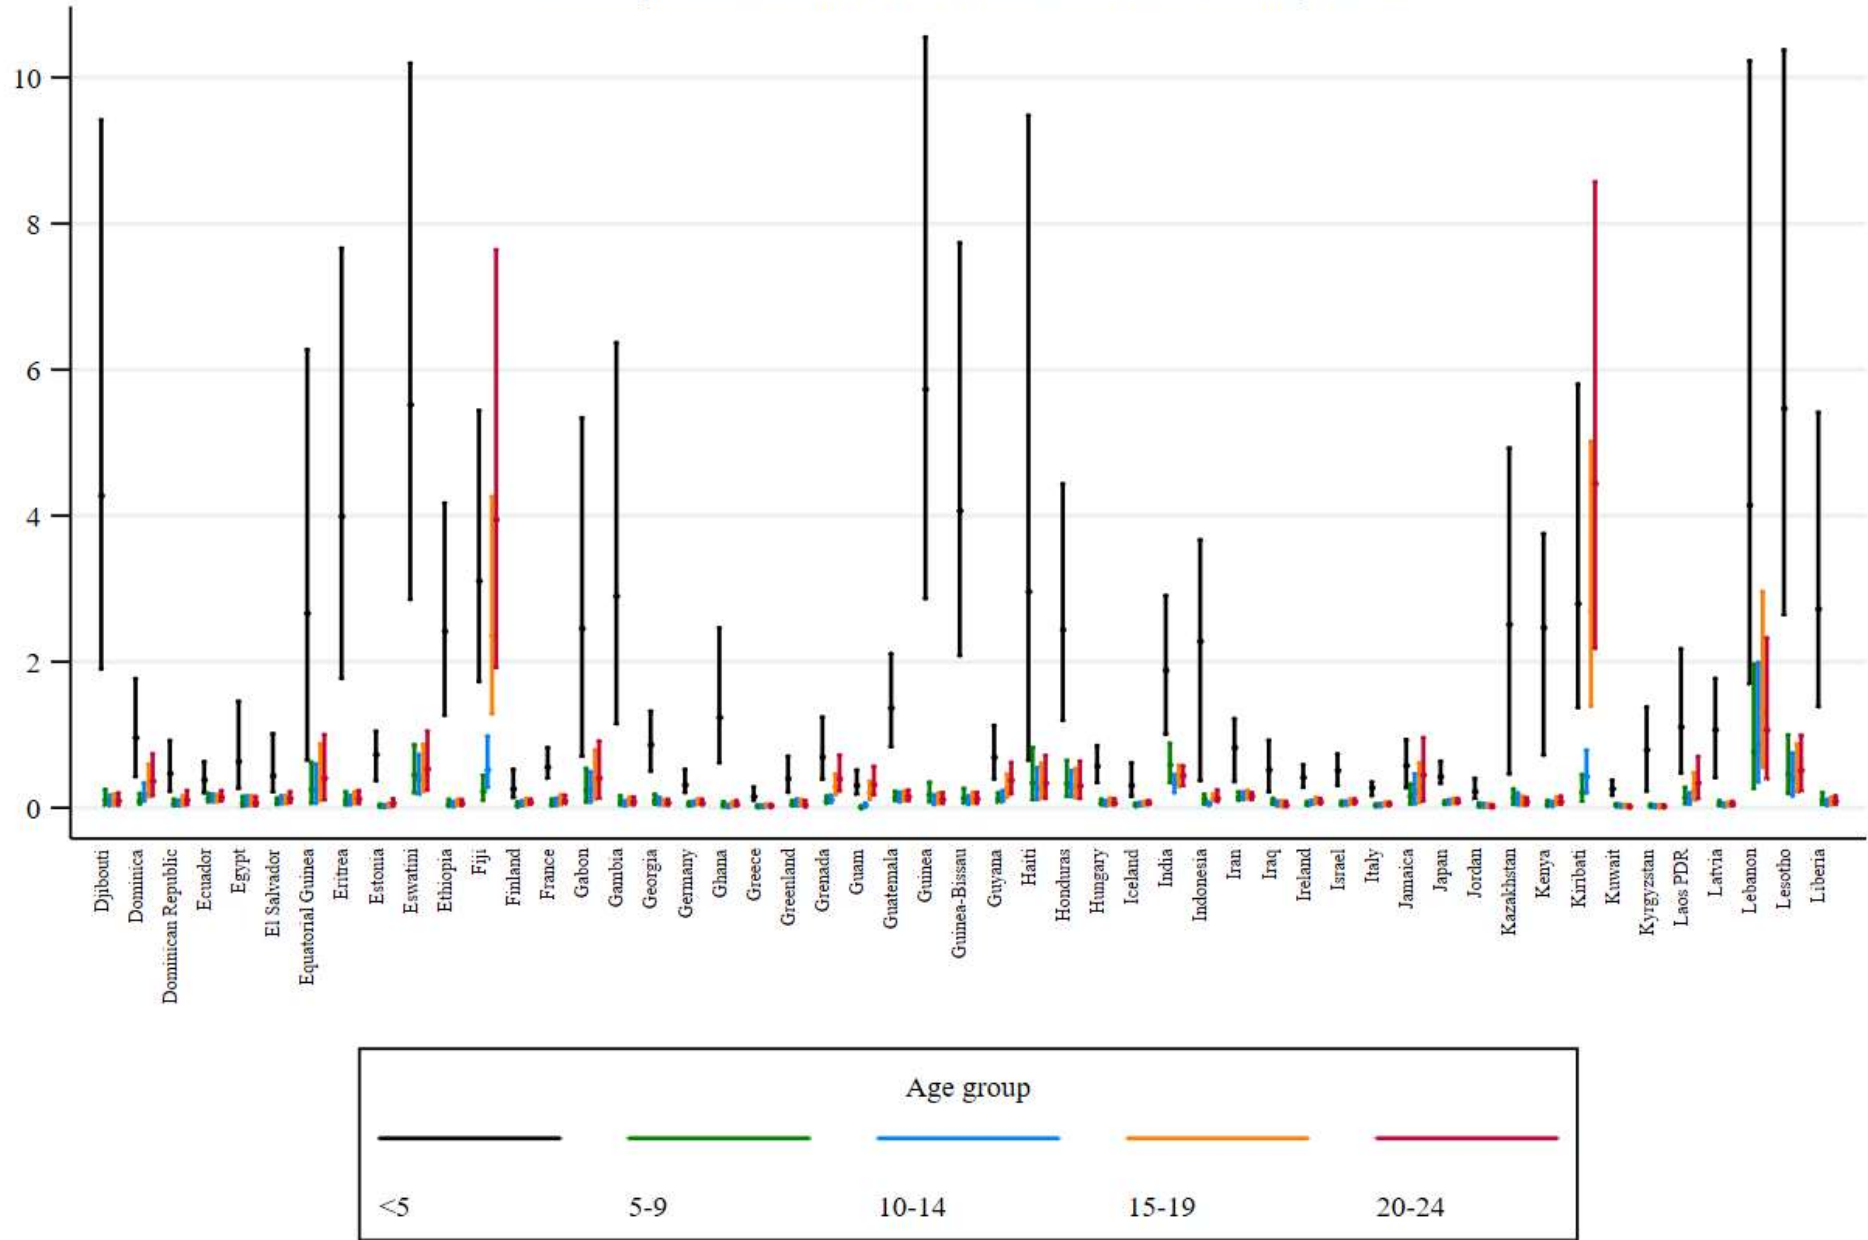

Other unspecified infectious diseases: Deaths/100,000 Uncertainty interval

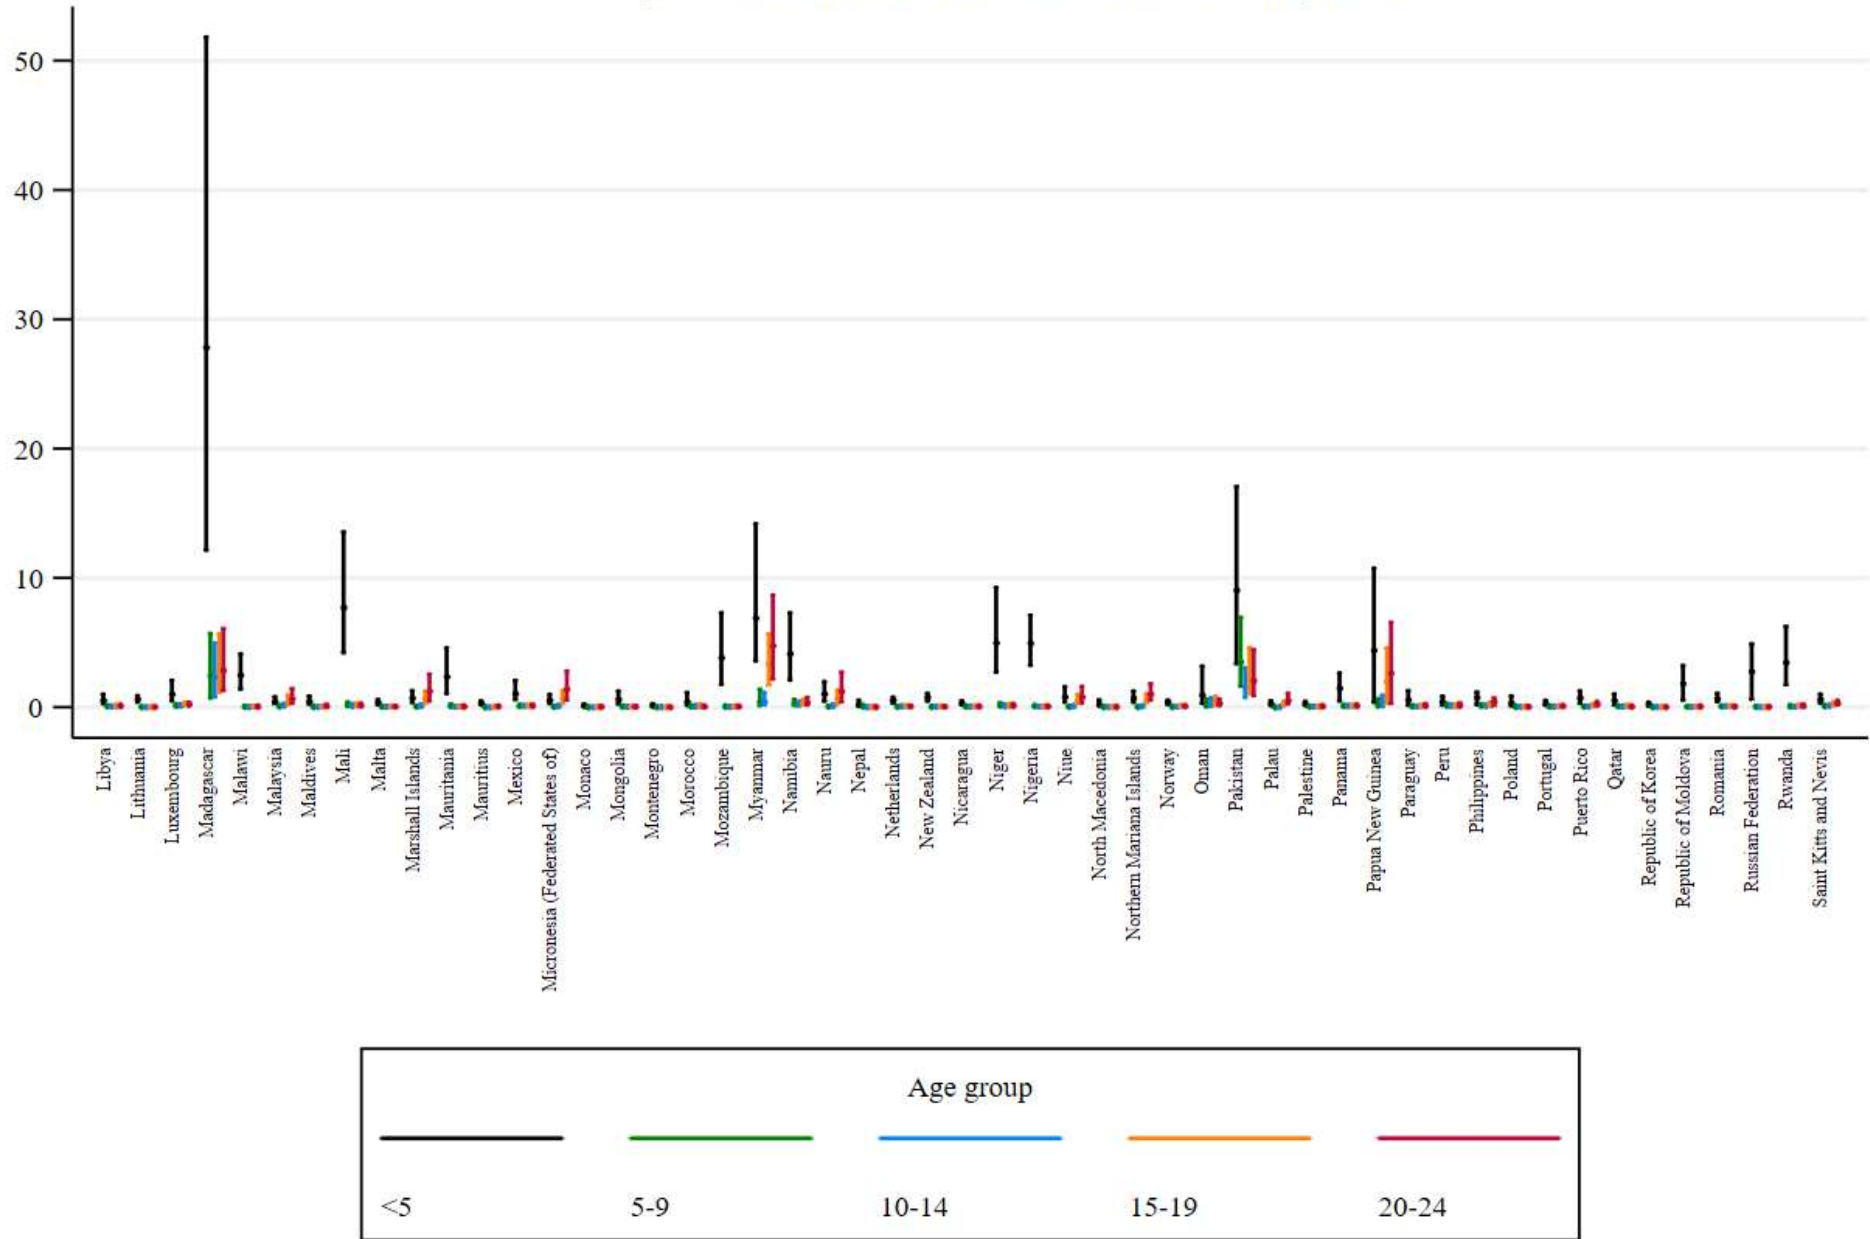

Other unspecified infectious diseases: Deaths/100,000 Uncertainty interval

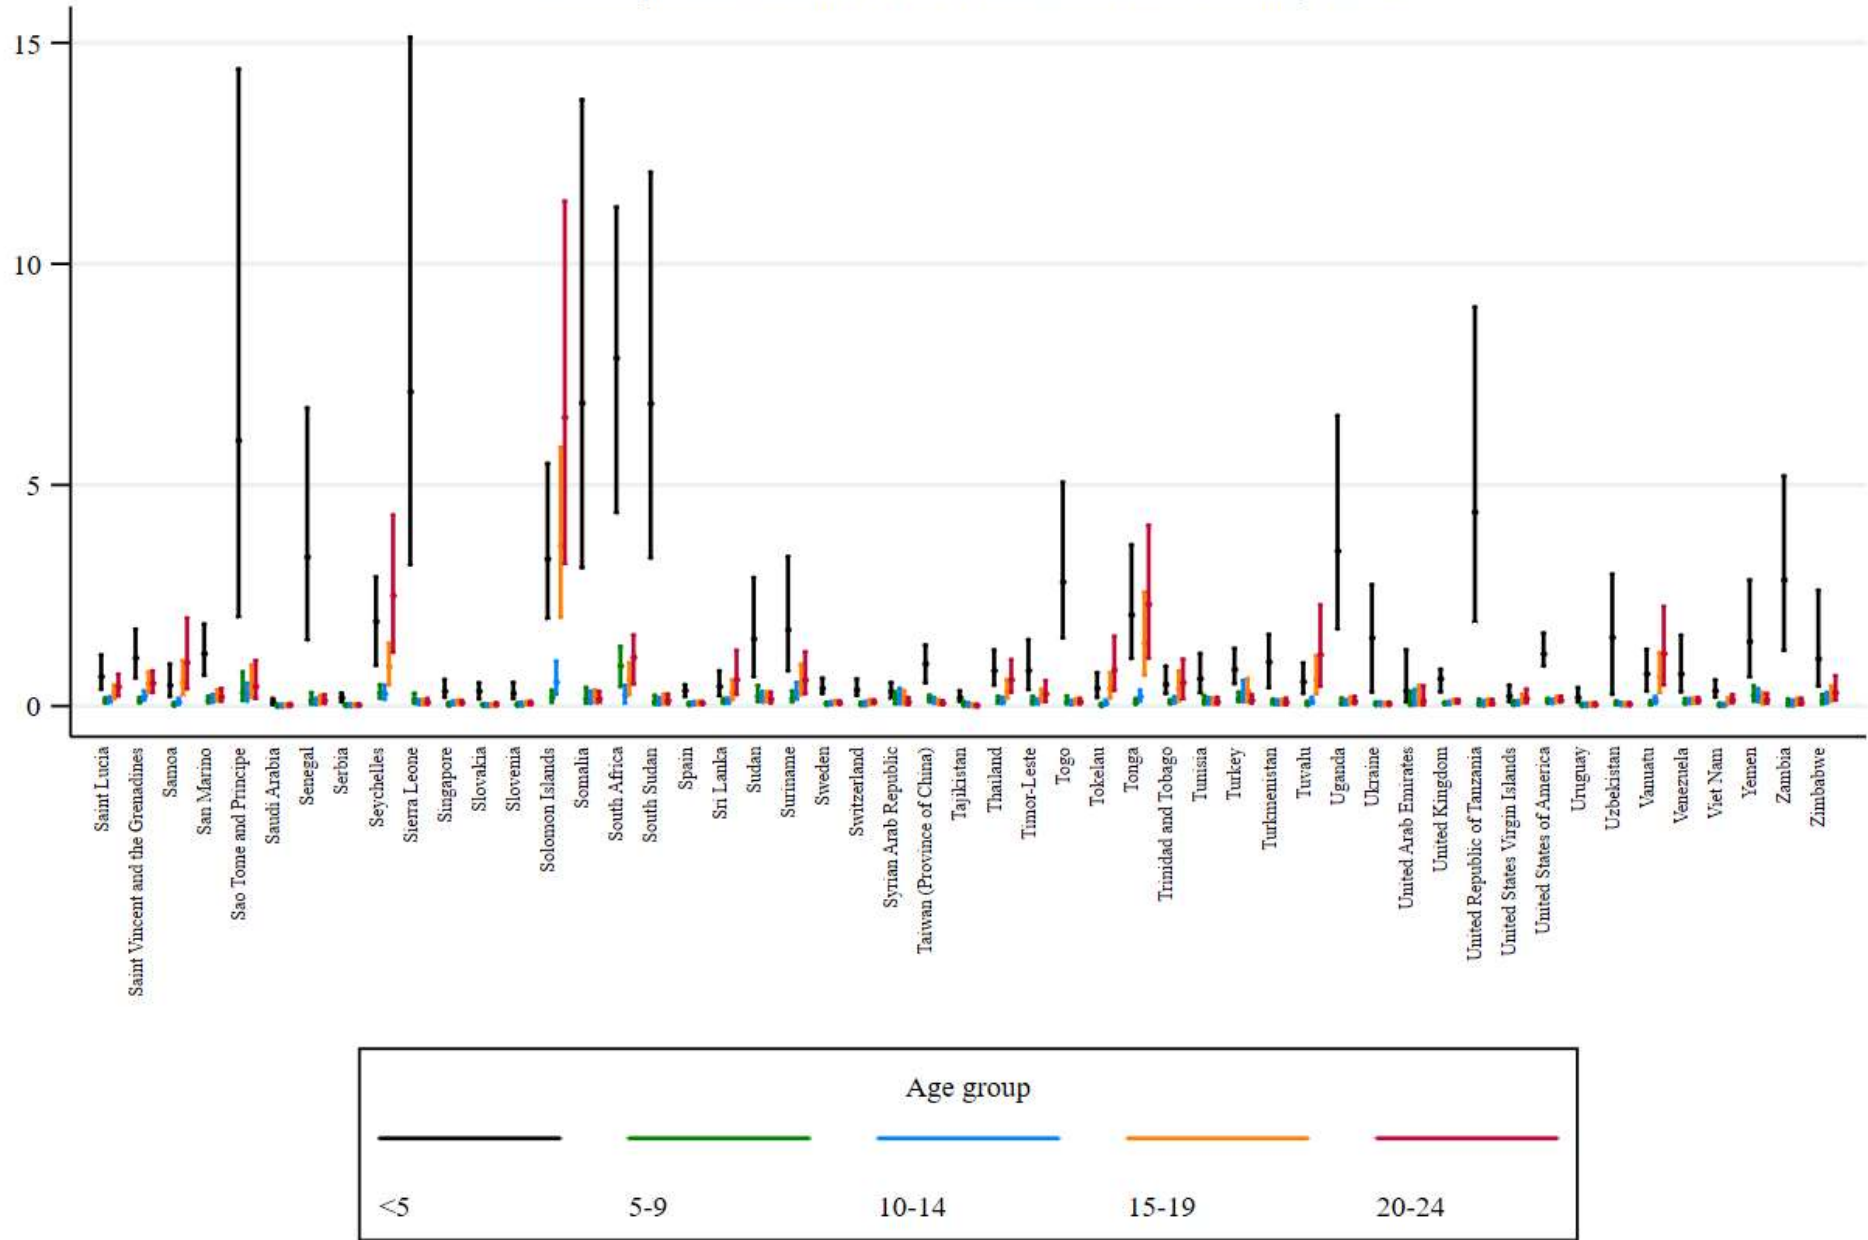

S20\_7 Part B: Other unspecified infectious diseases DALYs/ 100 000 Uncertainty interval for each age group

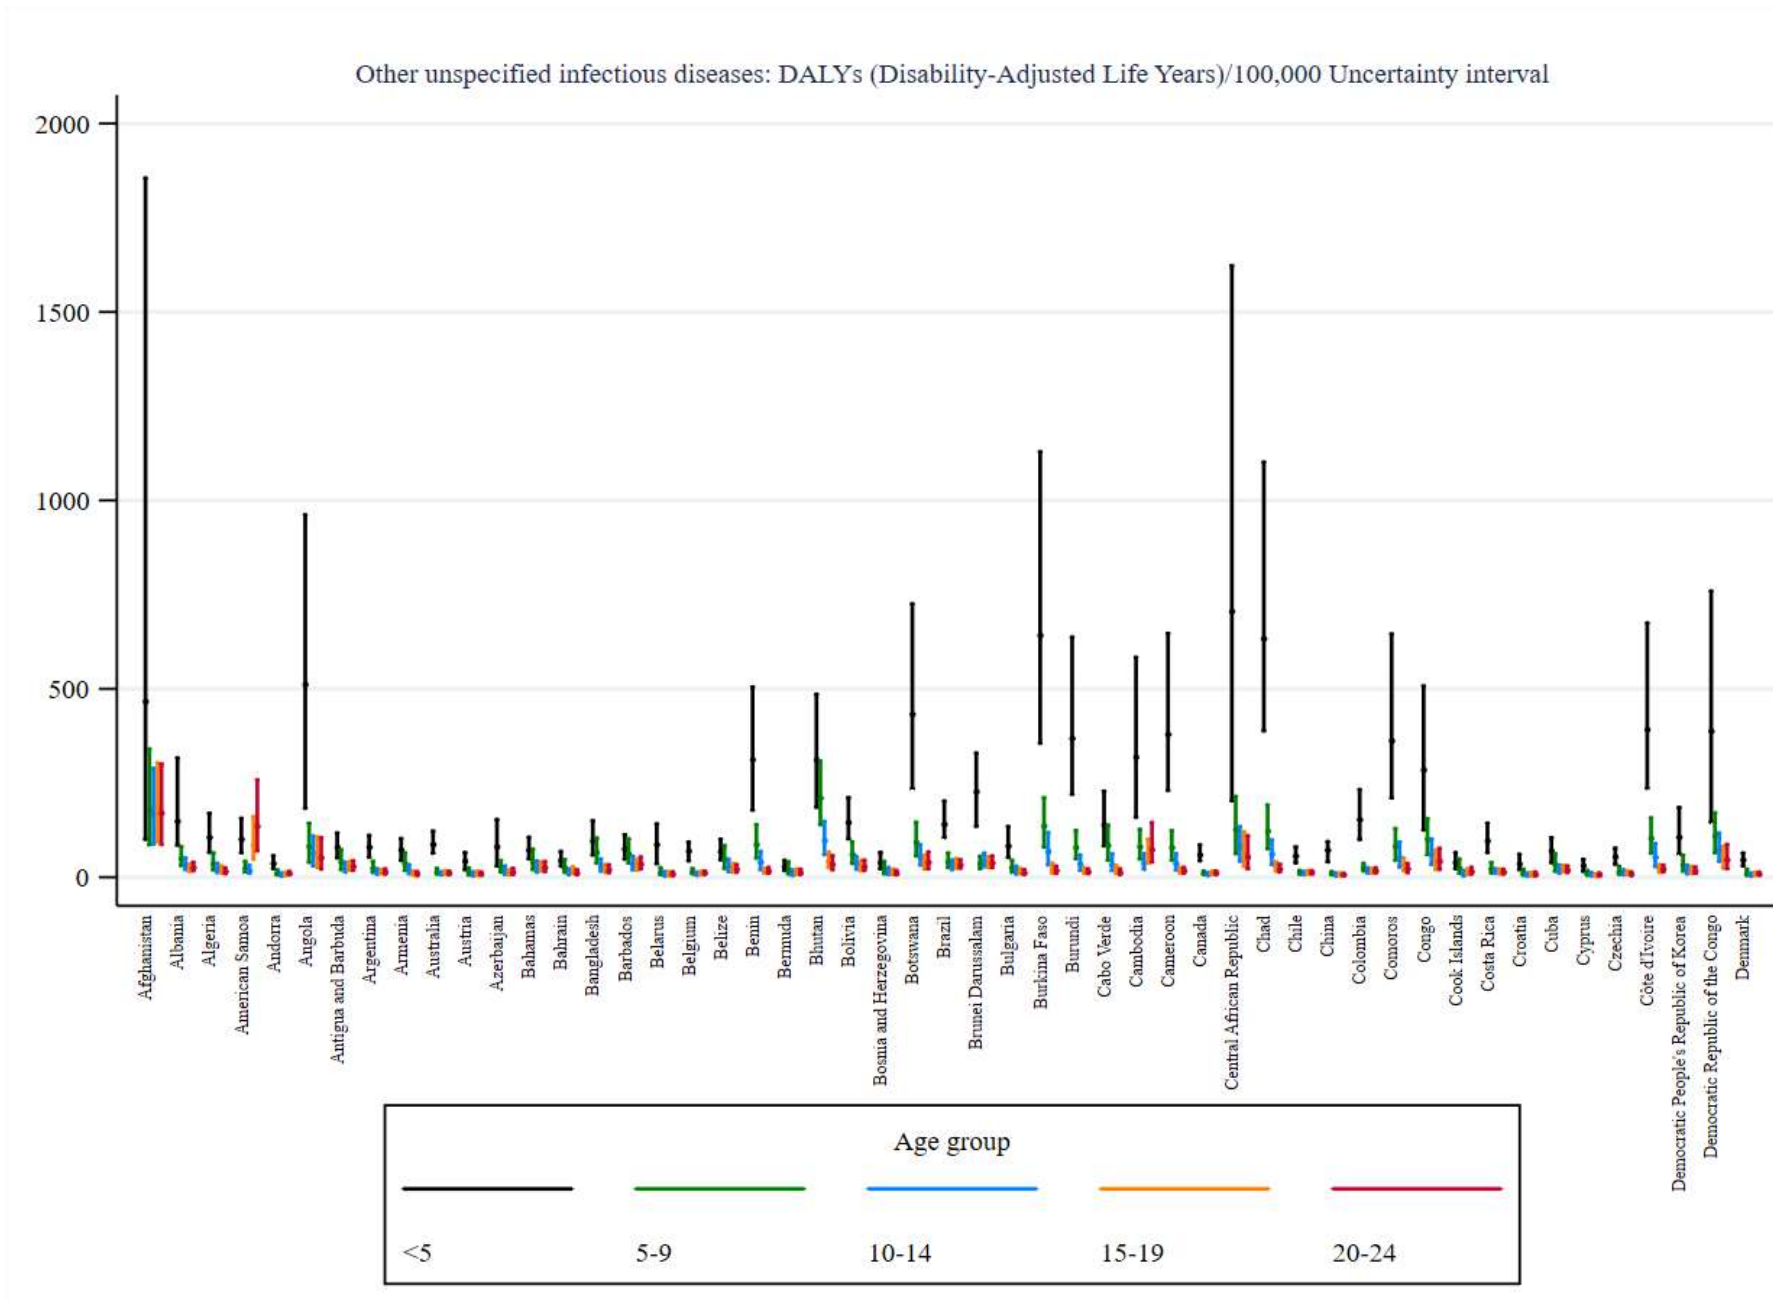

Other unspecified infectious diseases: DALYs (Disability-Adjusted Life Years)/100,000 Uncertainty interval

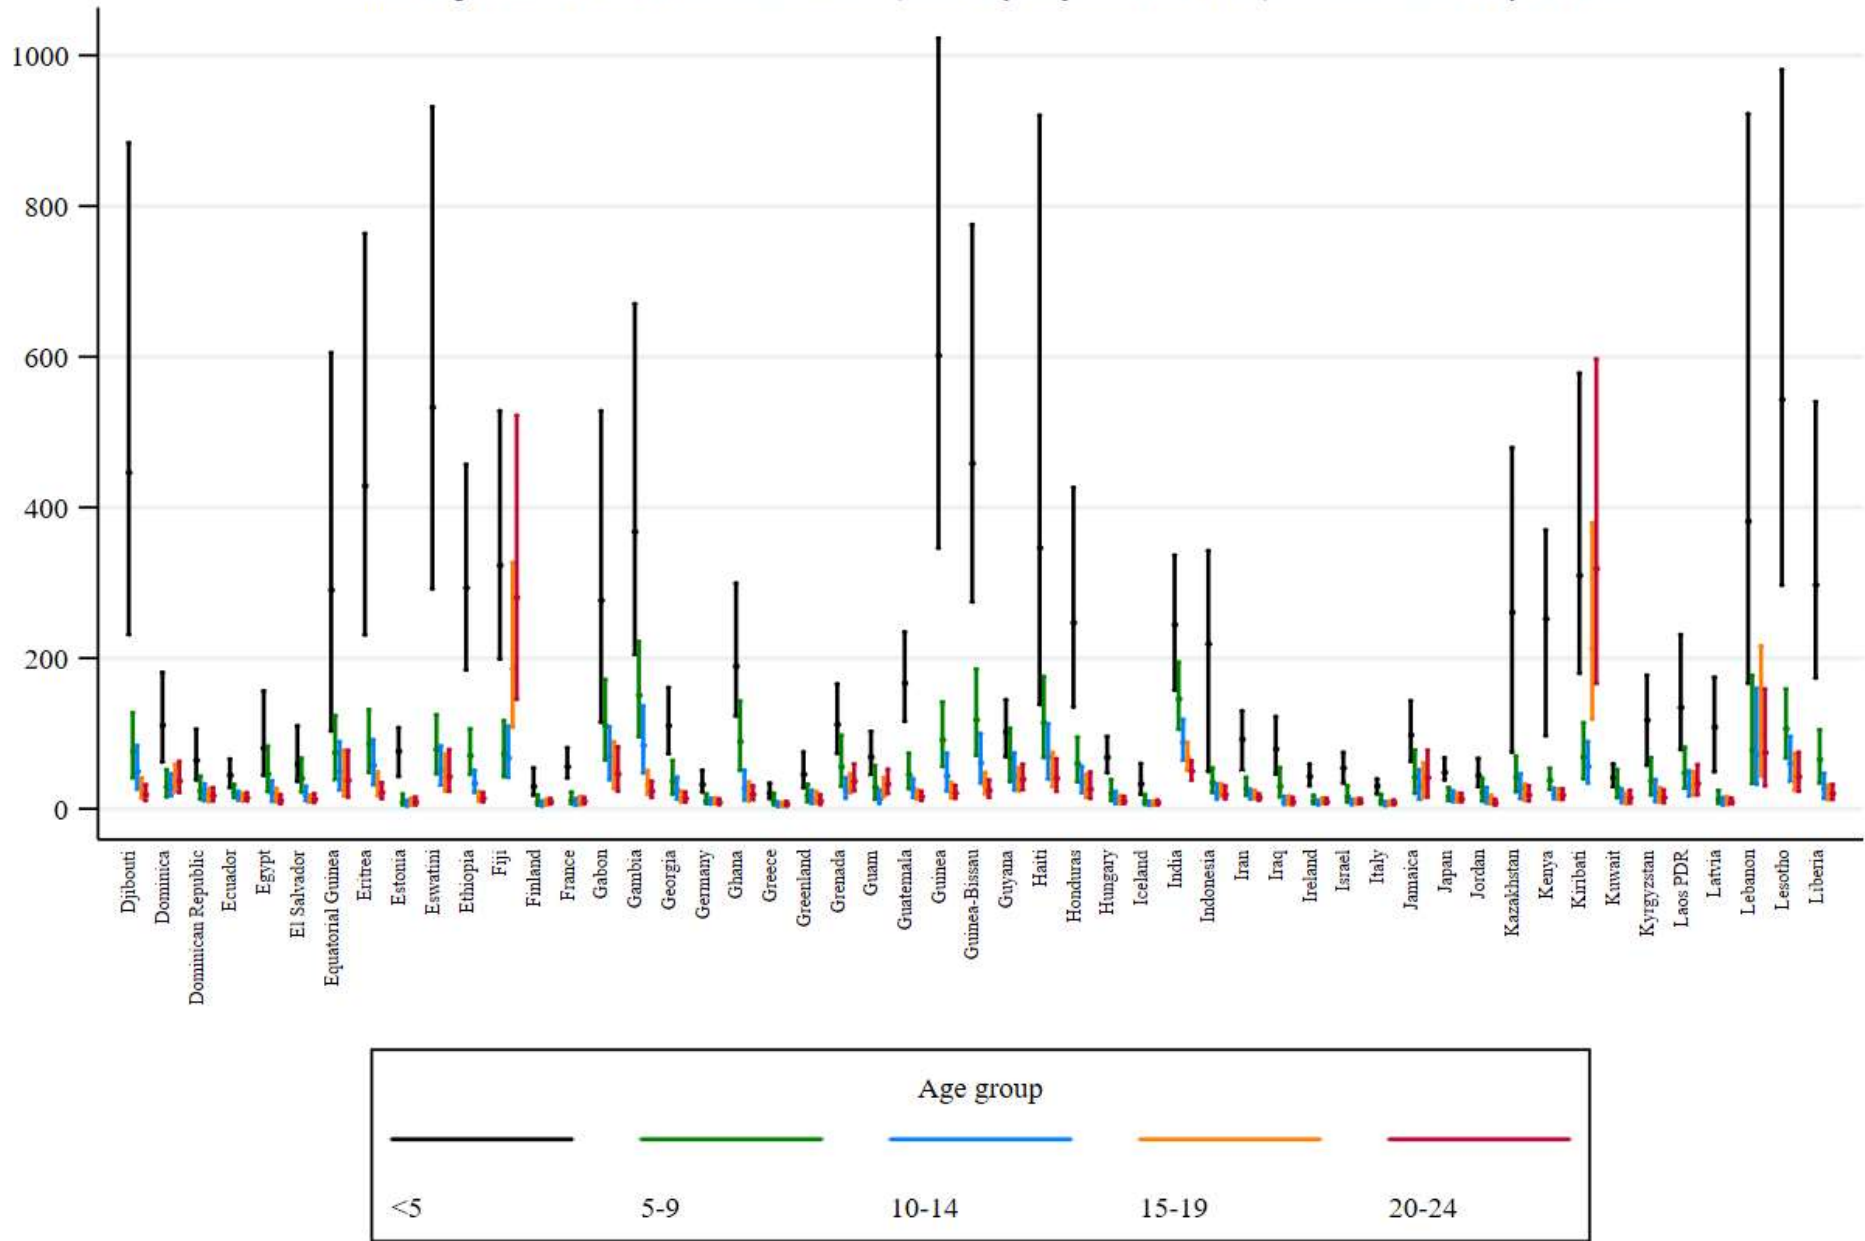



Other unspecified infectious diseases: DALYs (Disability-Adjusted Life Years)/100,000 Uncertainty interval

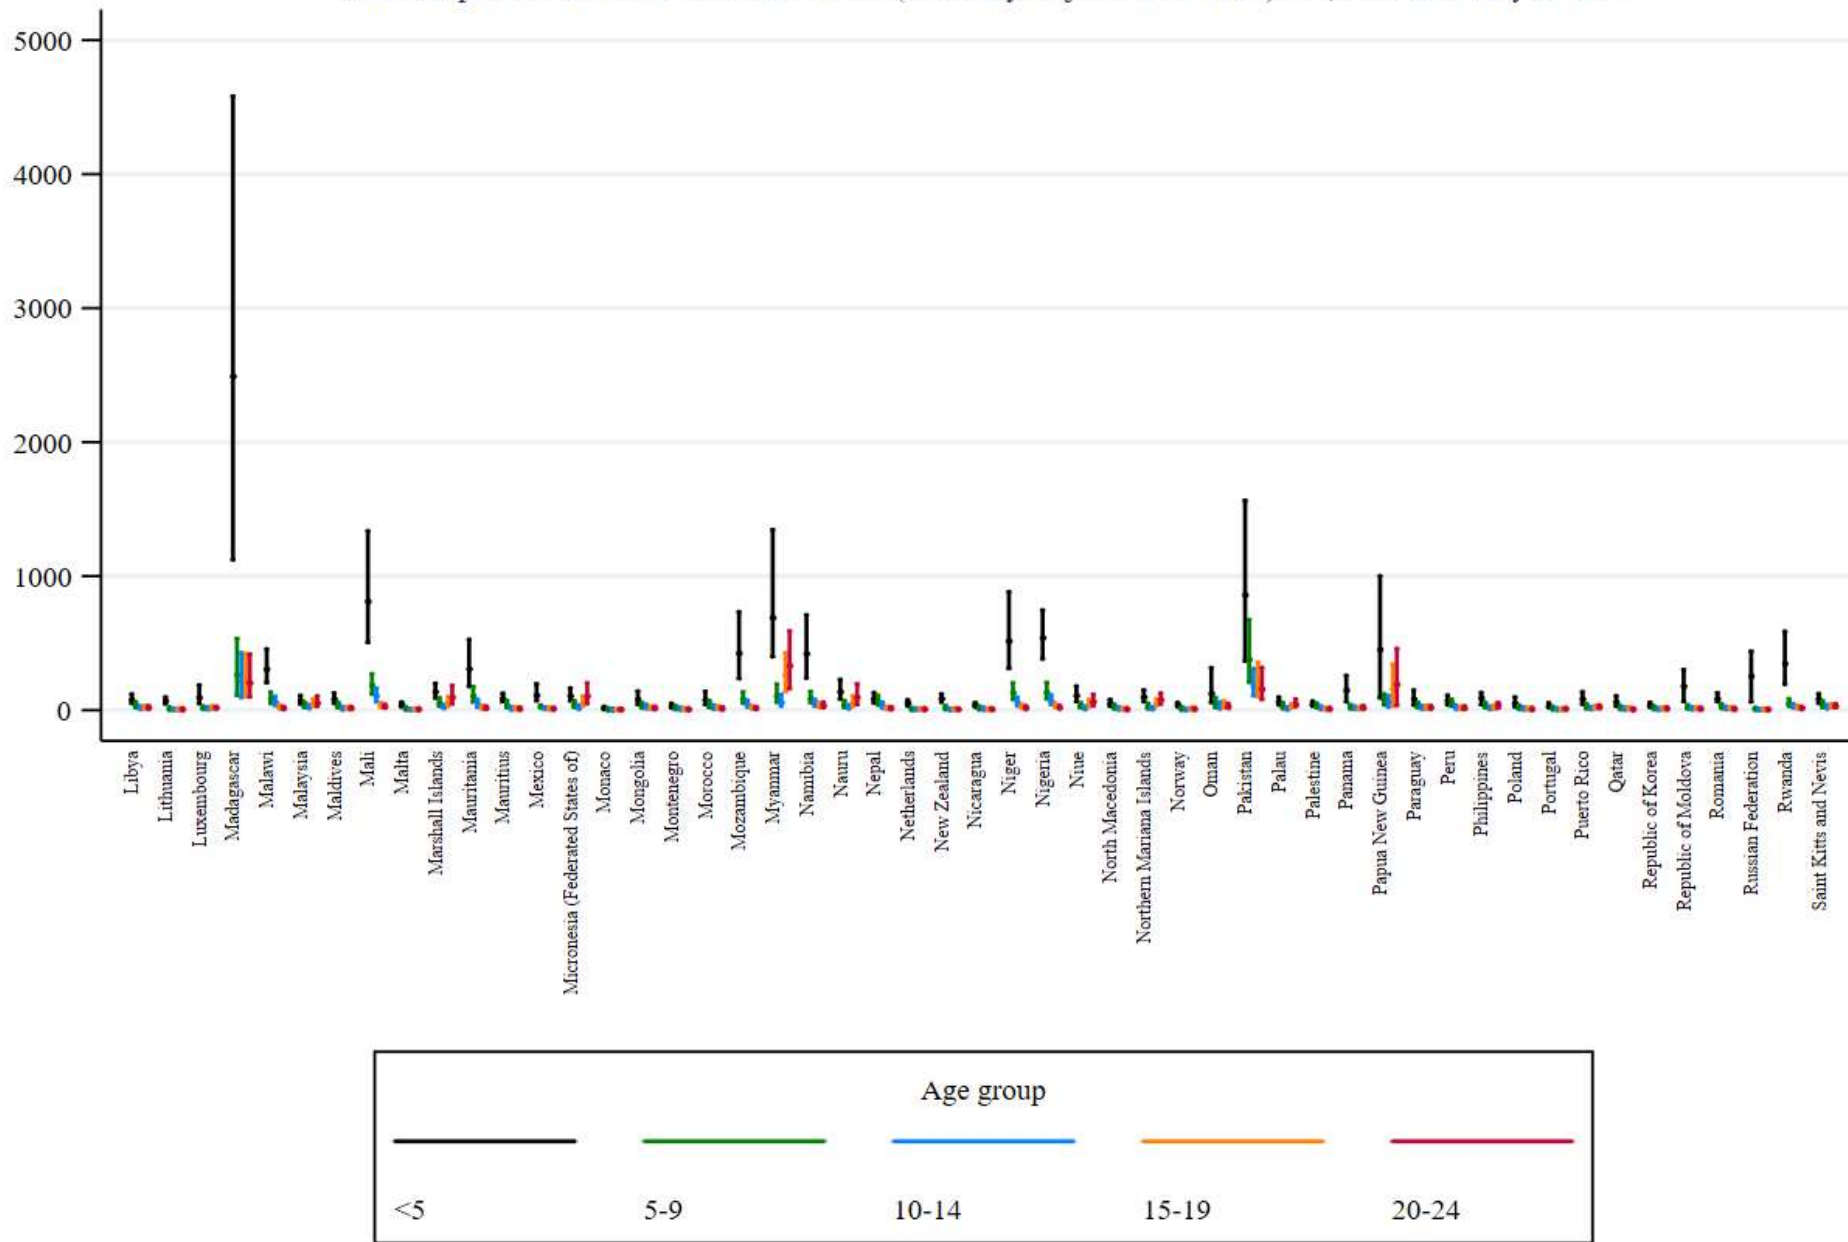

Other unspecified infectious diseases: DALYs (Disability-Adjusted Life Years)/100,000 Uncertainty interval

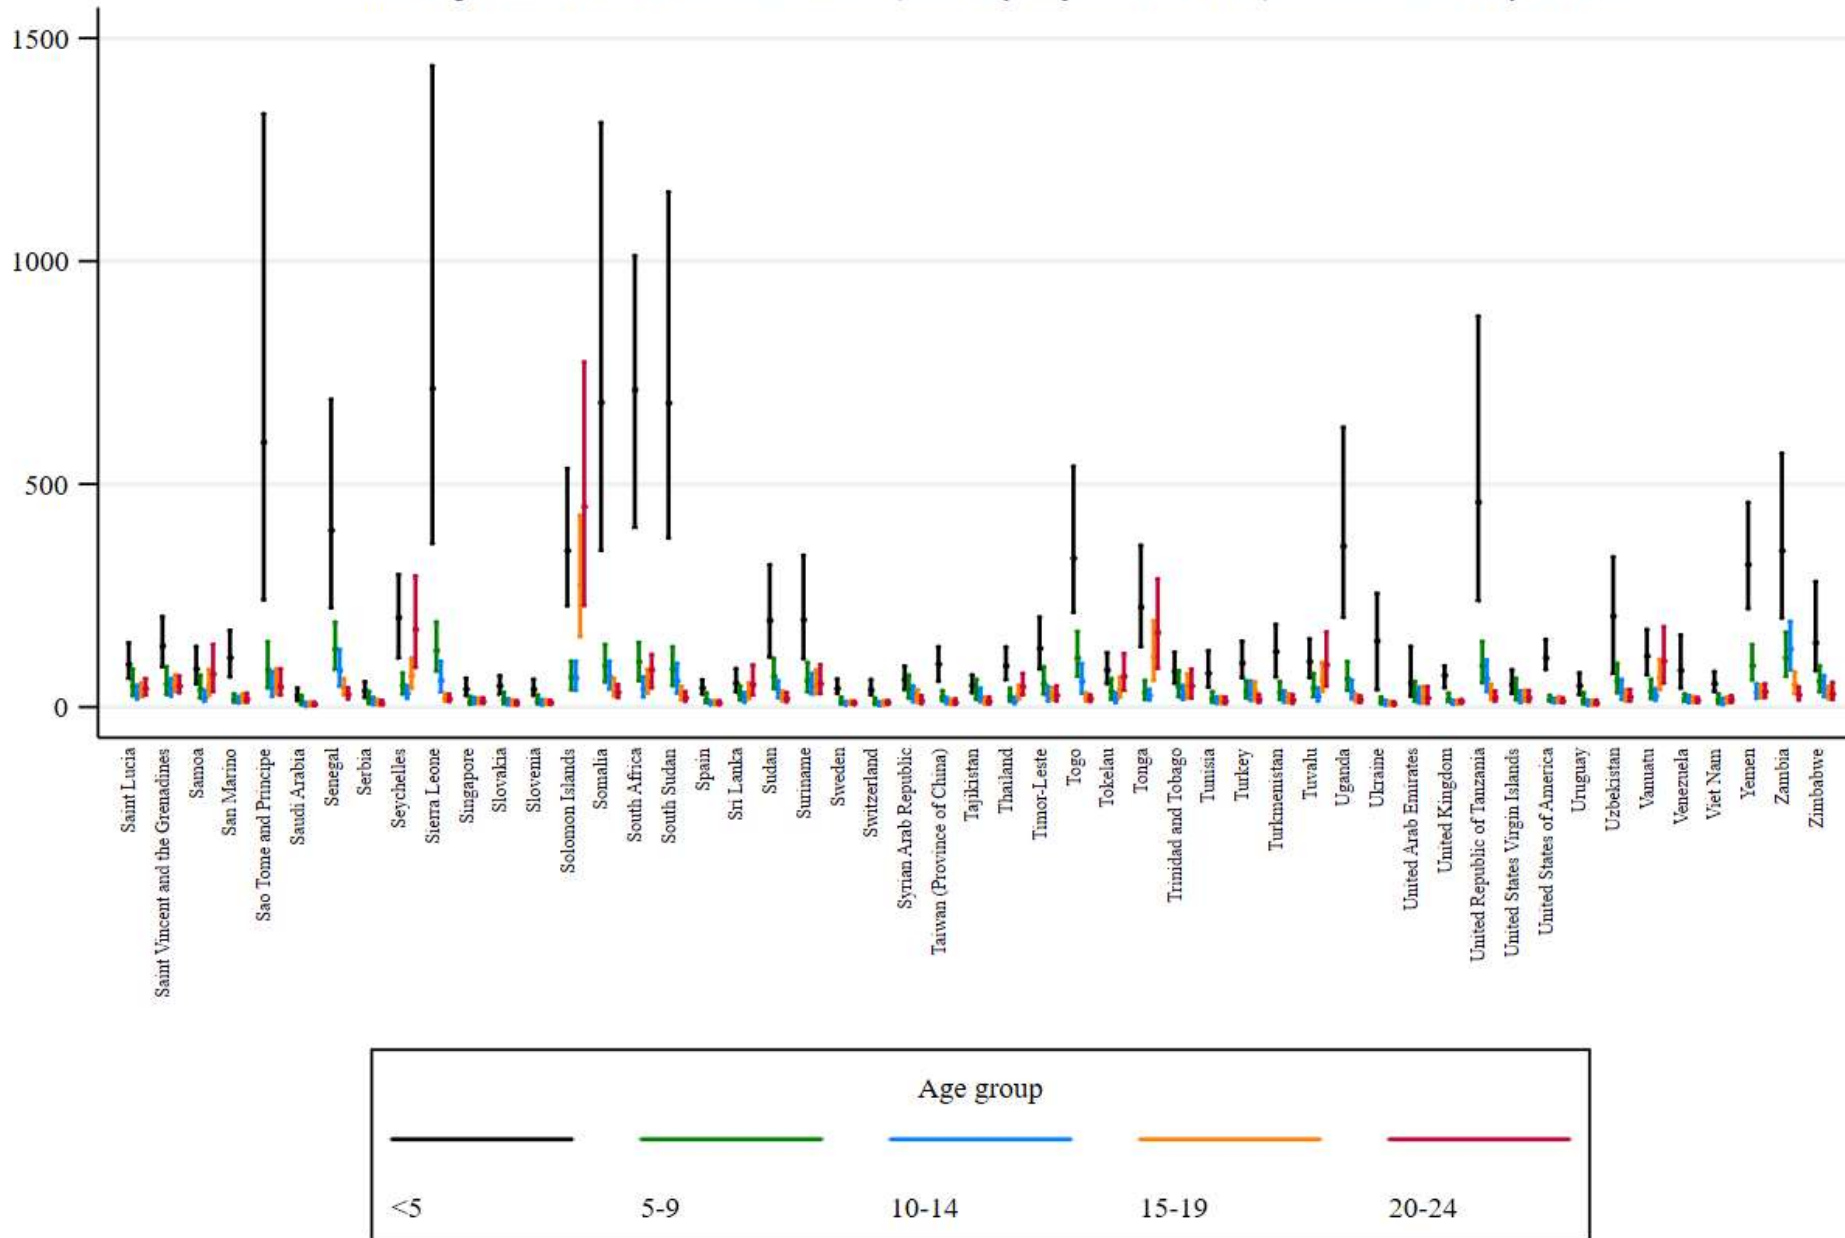

S20\_8 Part A: Rheumatic heart disease Deaths/ 100 000 Uncertainty interval for each age group

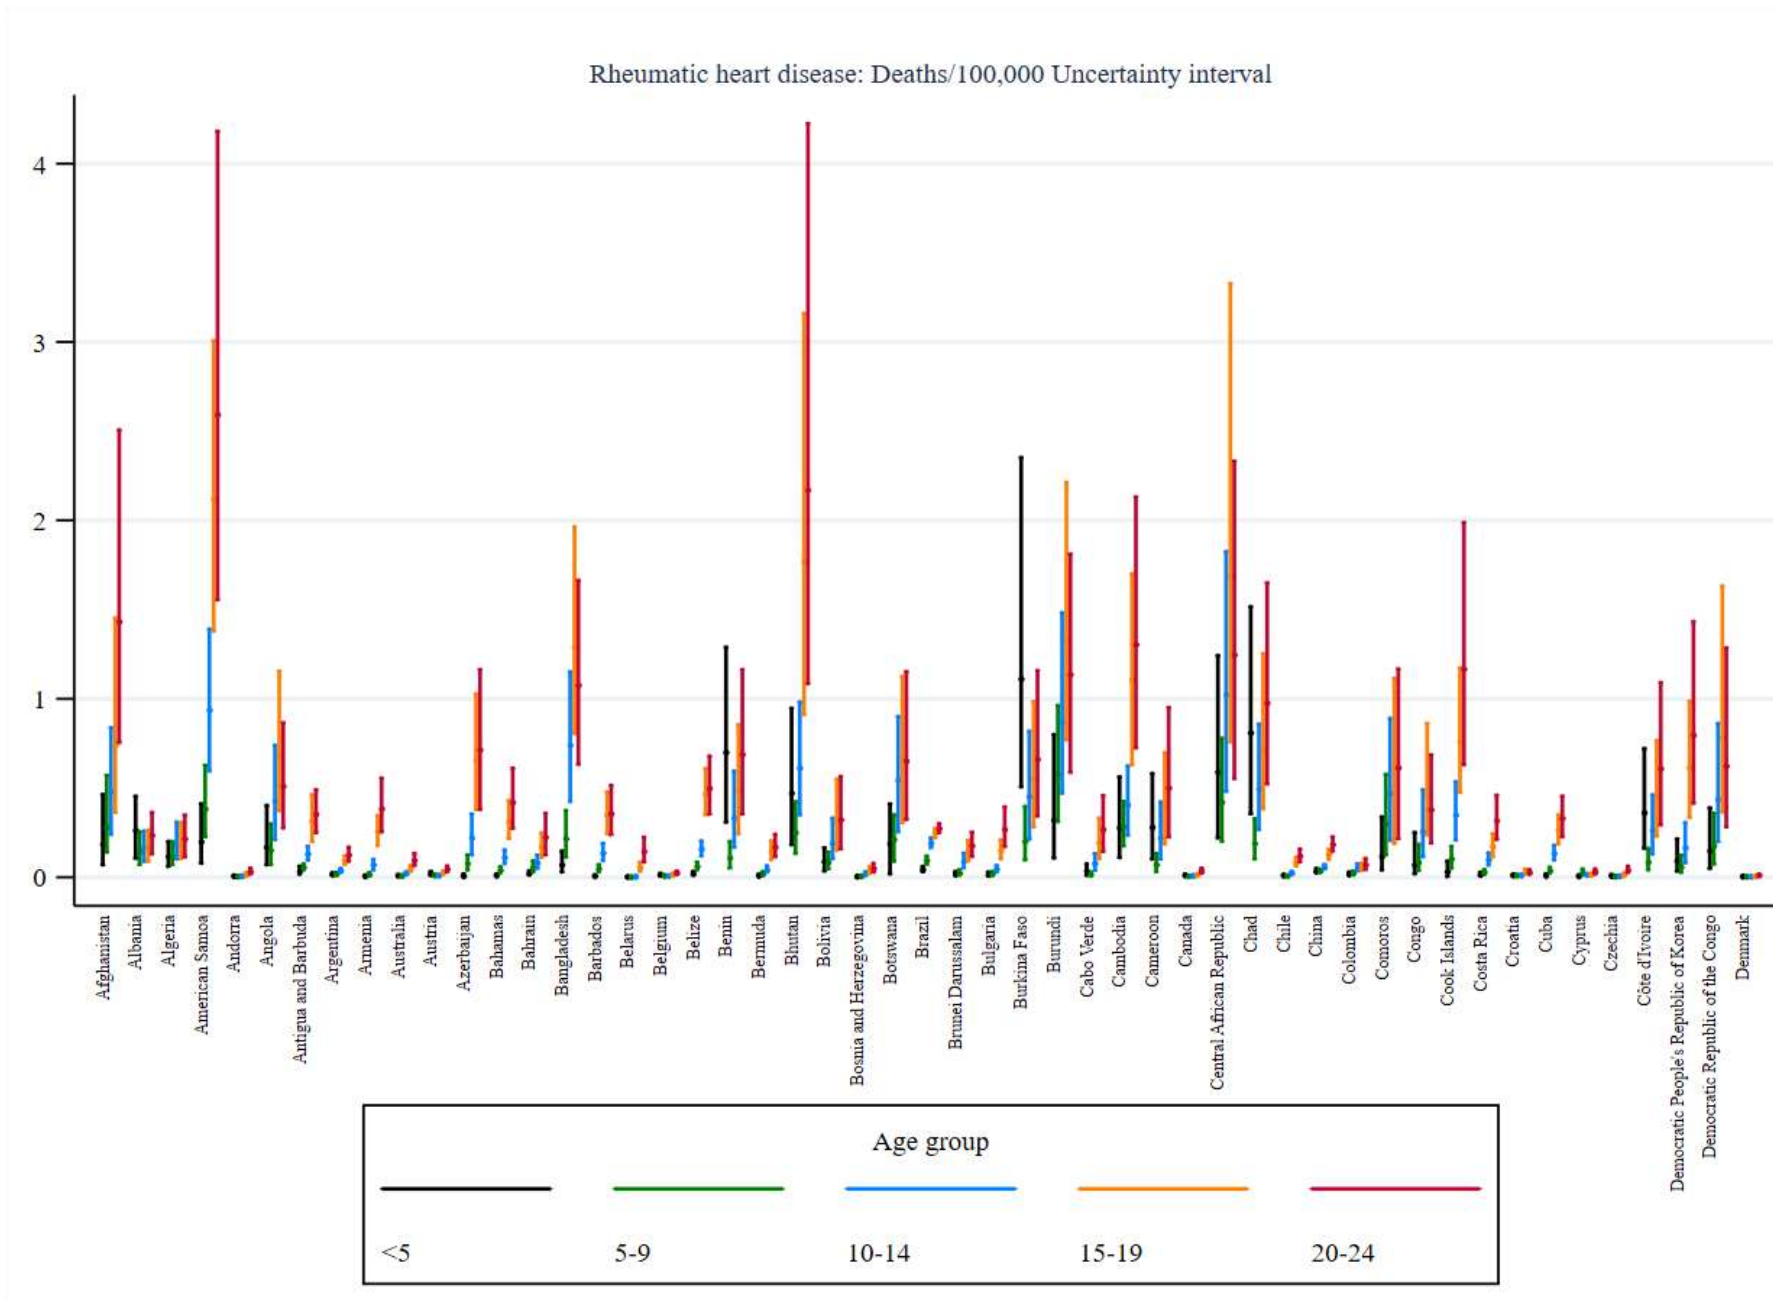

Rheumatic heart disease: Deaths/100,000 Uncertainty interval

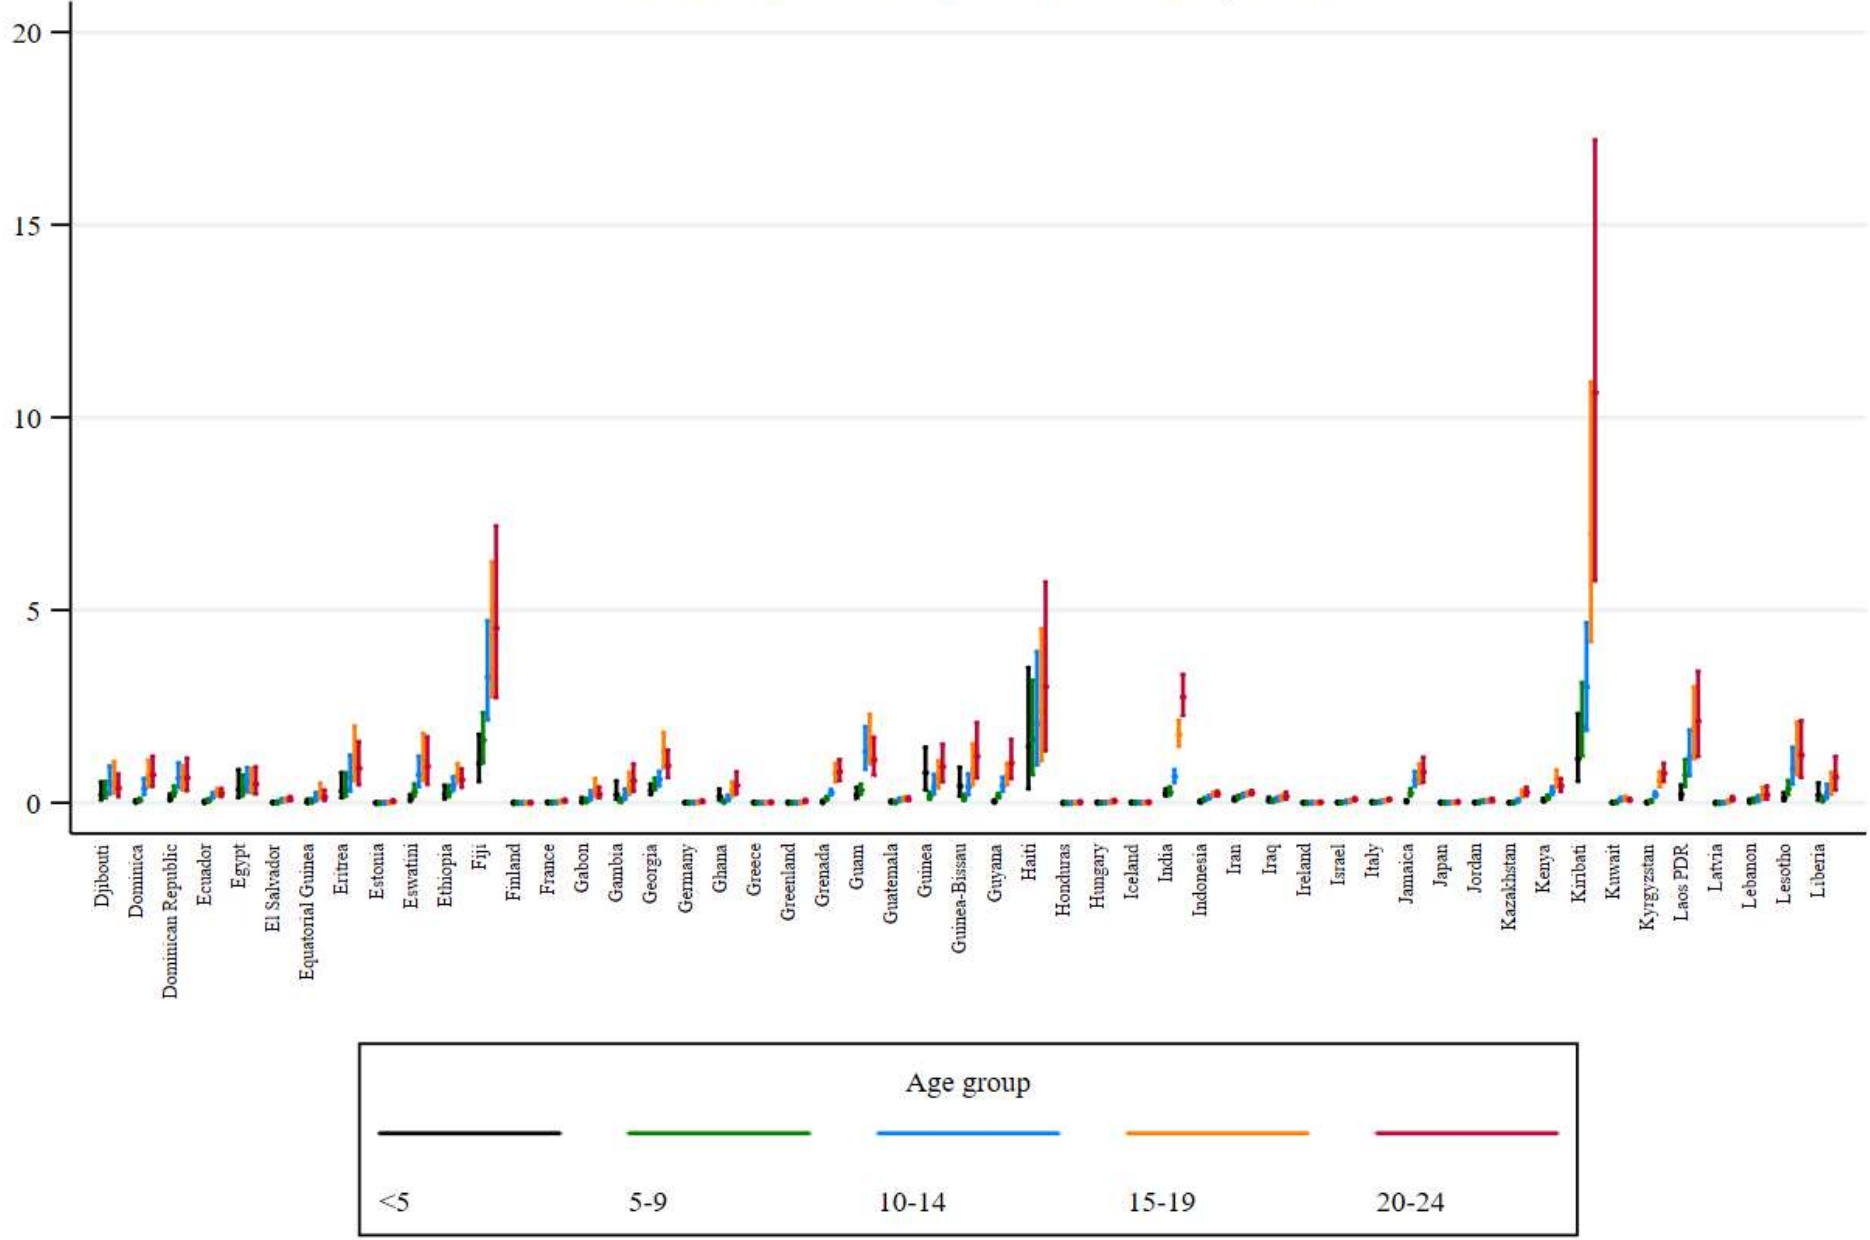

Rheumatic heart disease: Deaths/100,000 Uncertainty interval

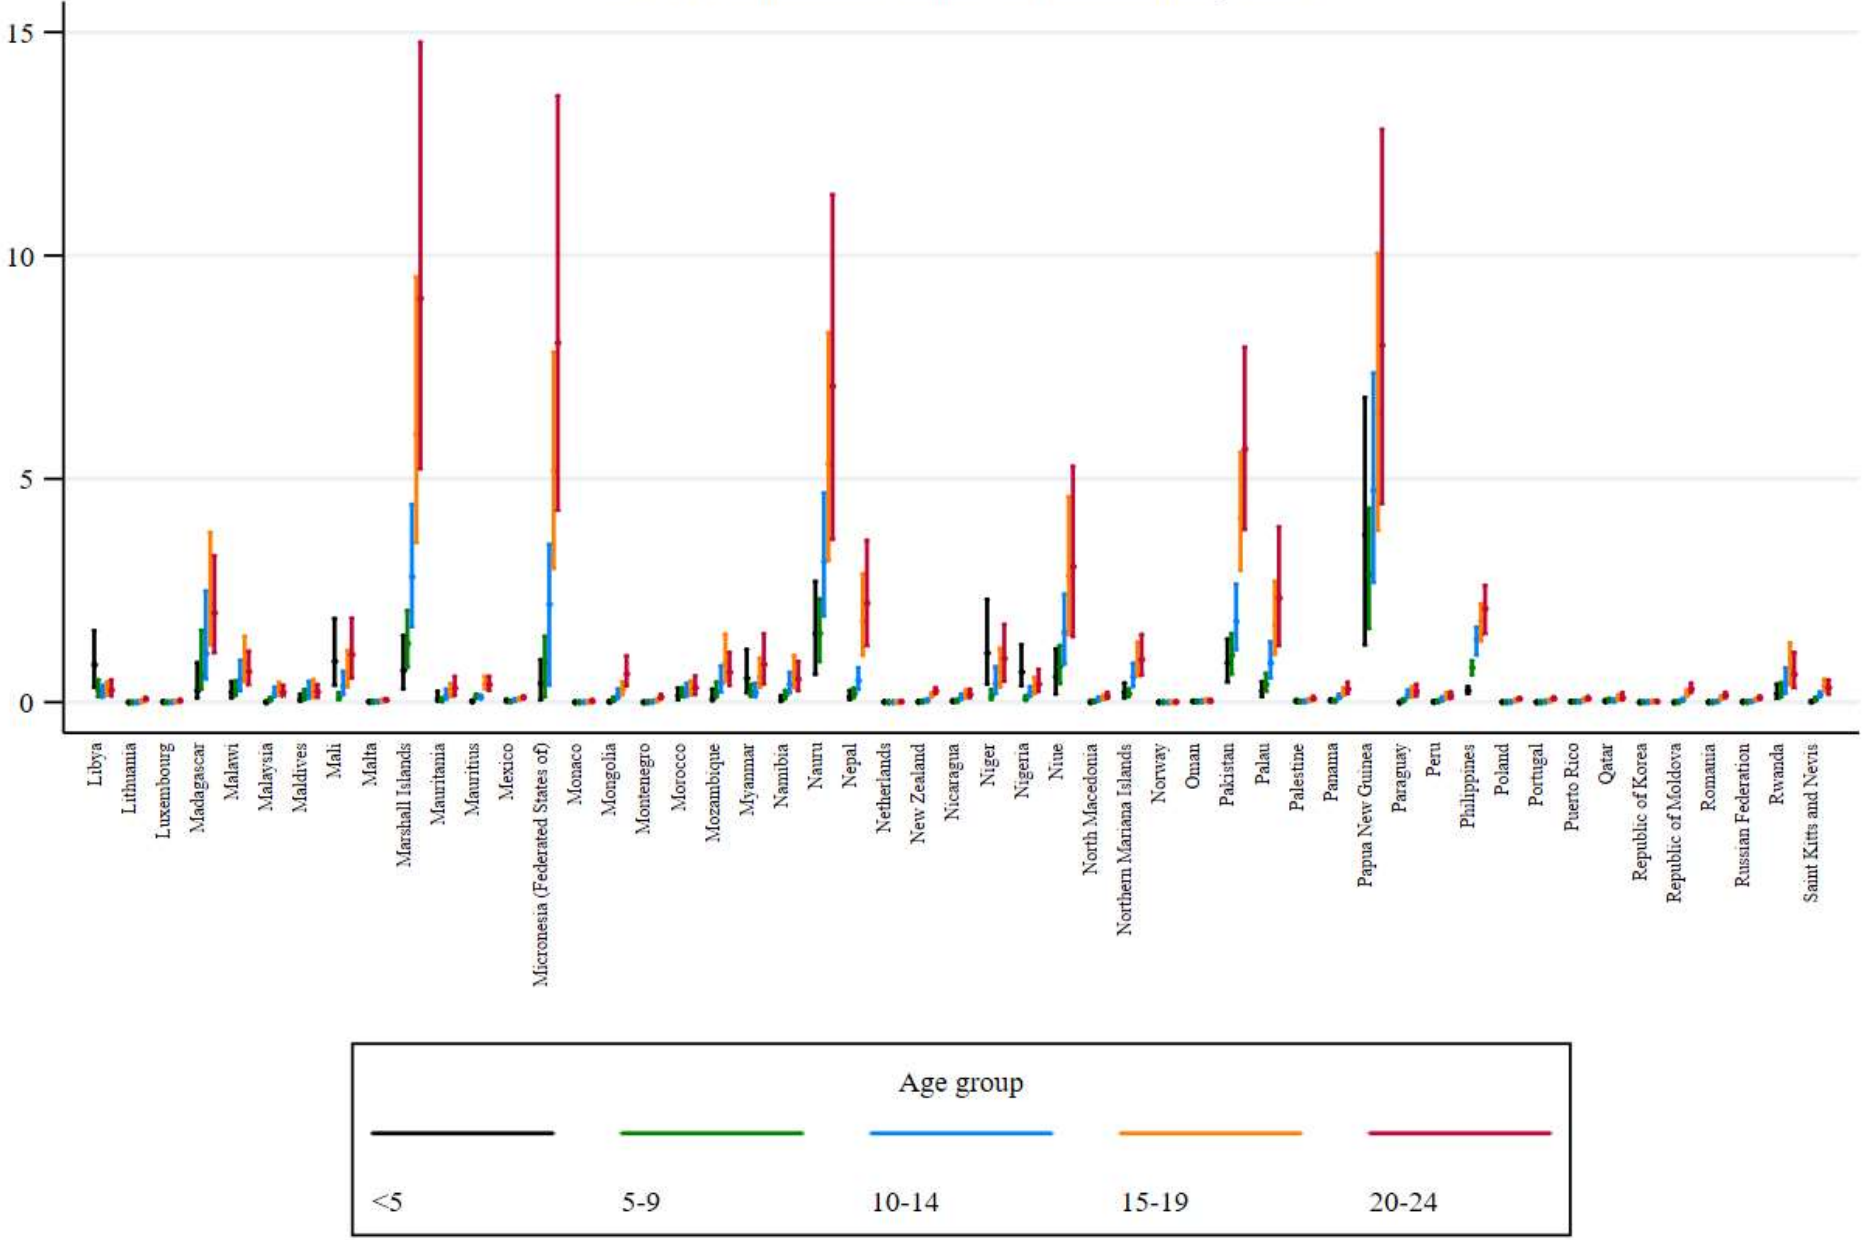

Rheumatic heart disease: Deaths/100,000 Uncertainty interval

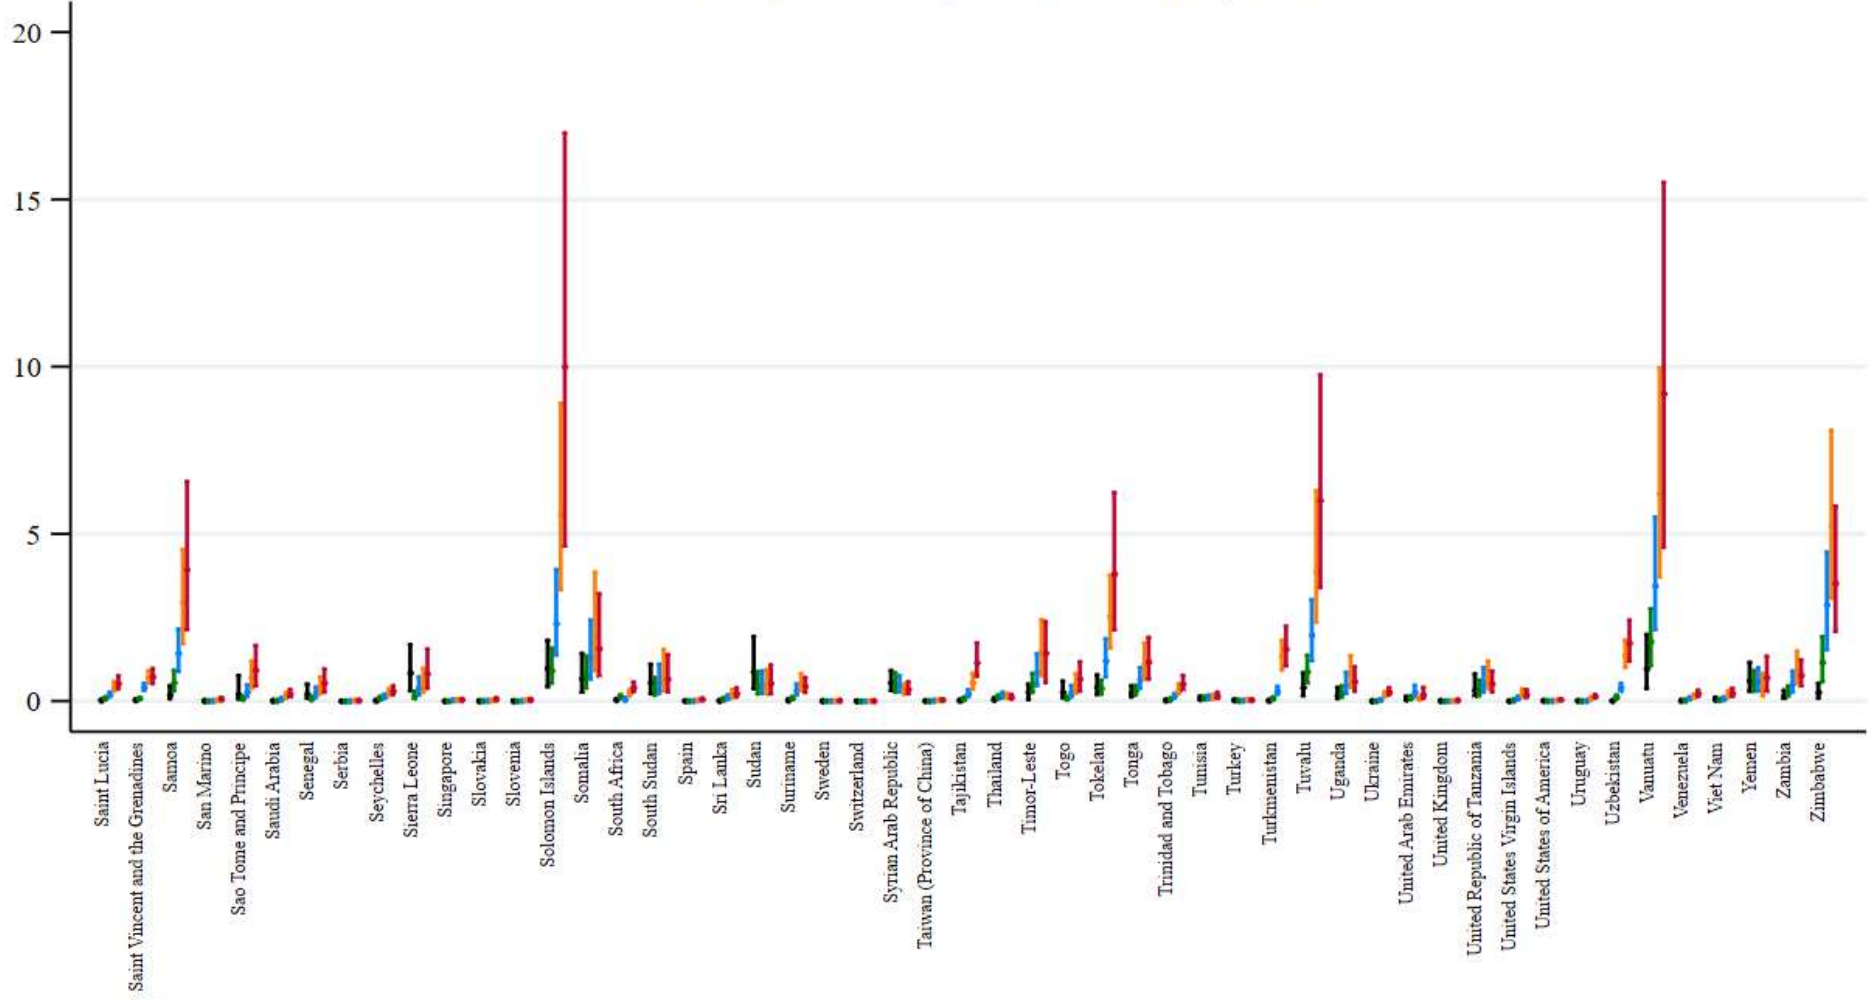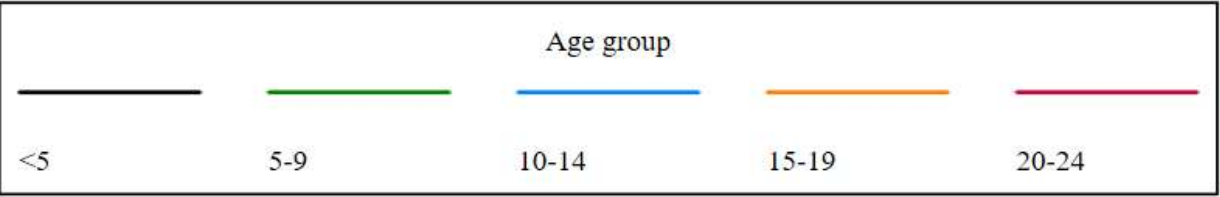

S20\_8 Part B: Rheumatic heart disease DALYs/ 100 000 Uncertainty interval for each age group

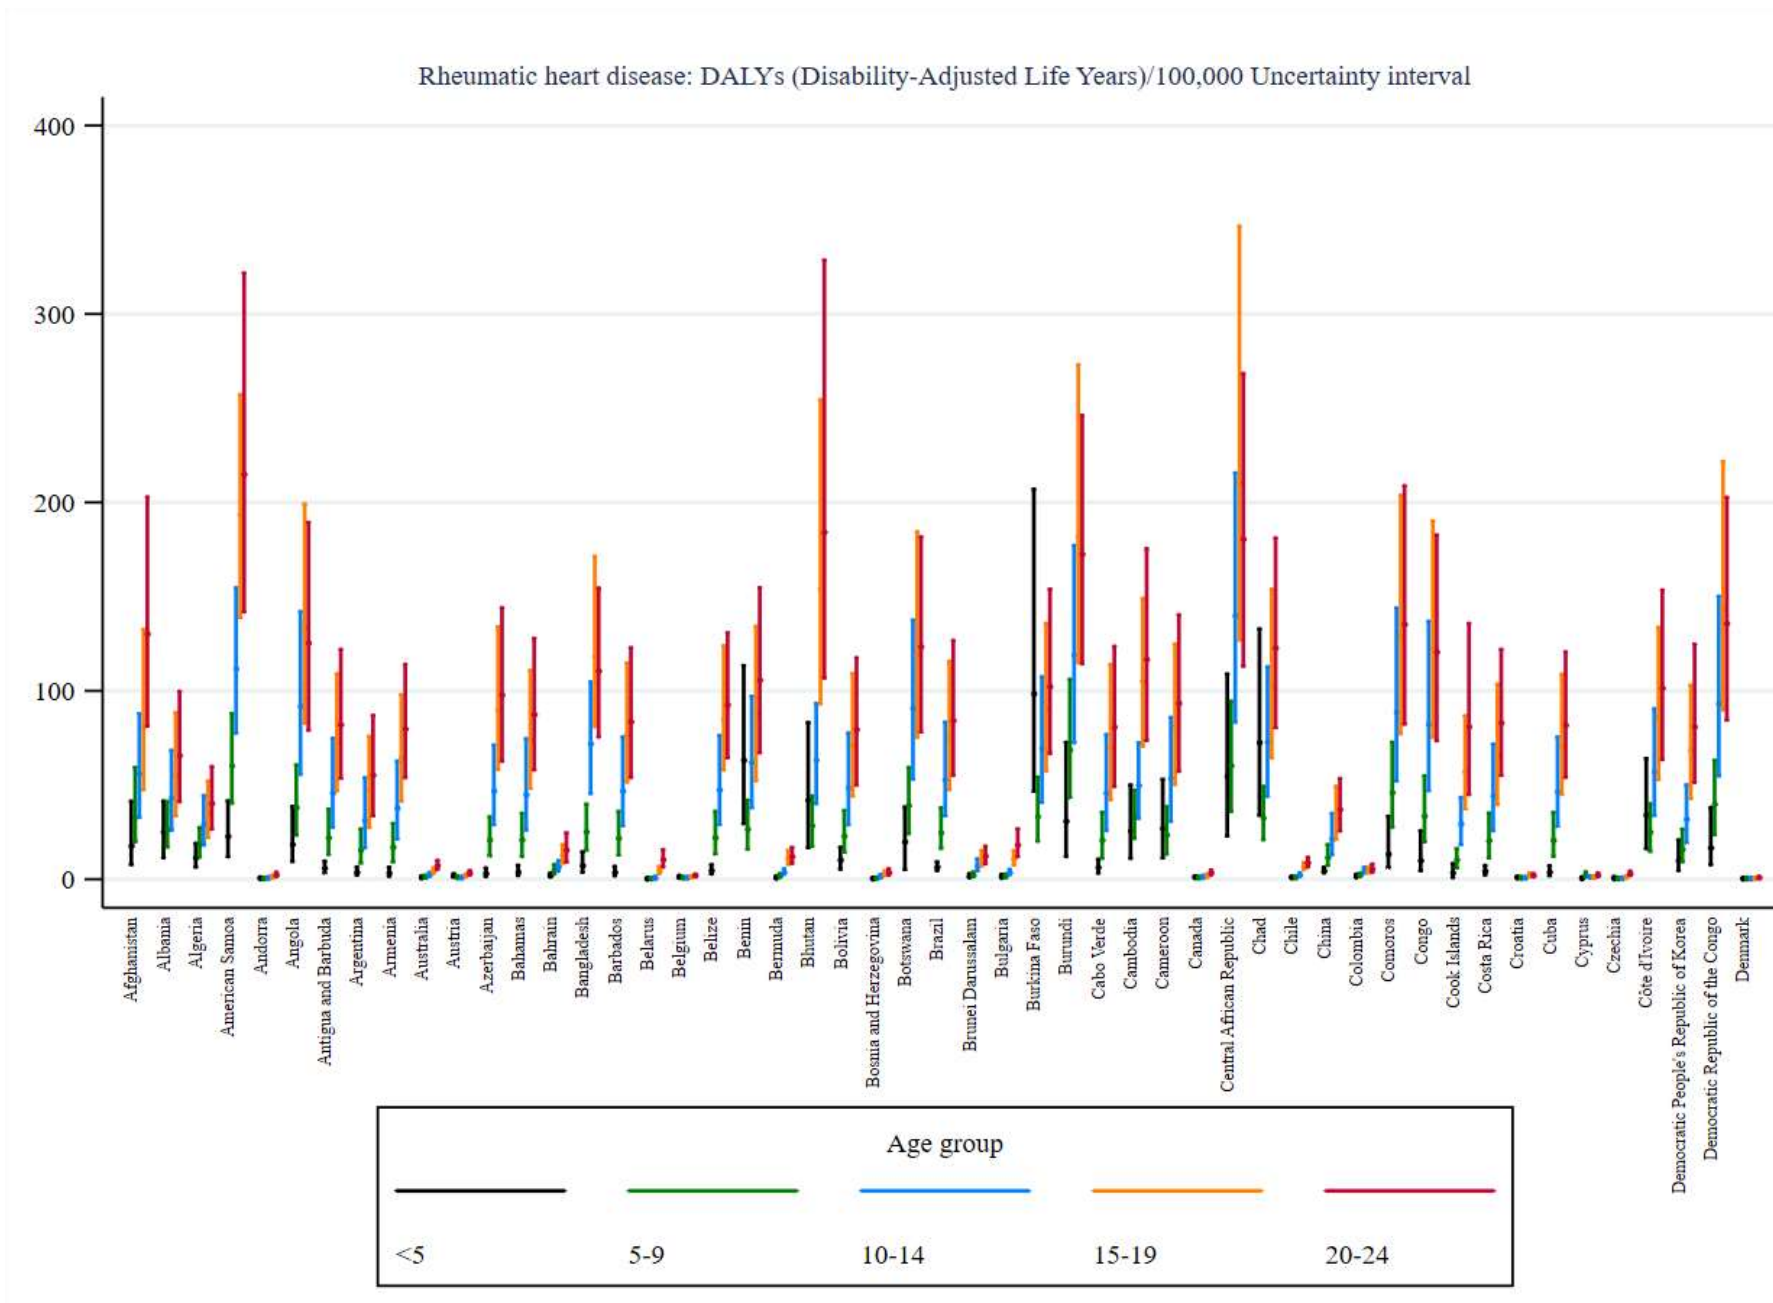

Rheumatic heart disease: DALYs (Disability-Adjusted Life Years)/100,000 Uncertainty interval

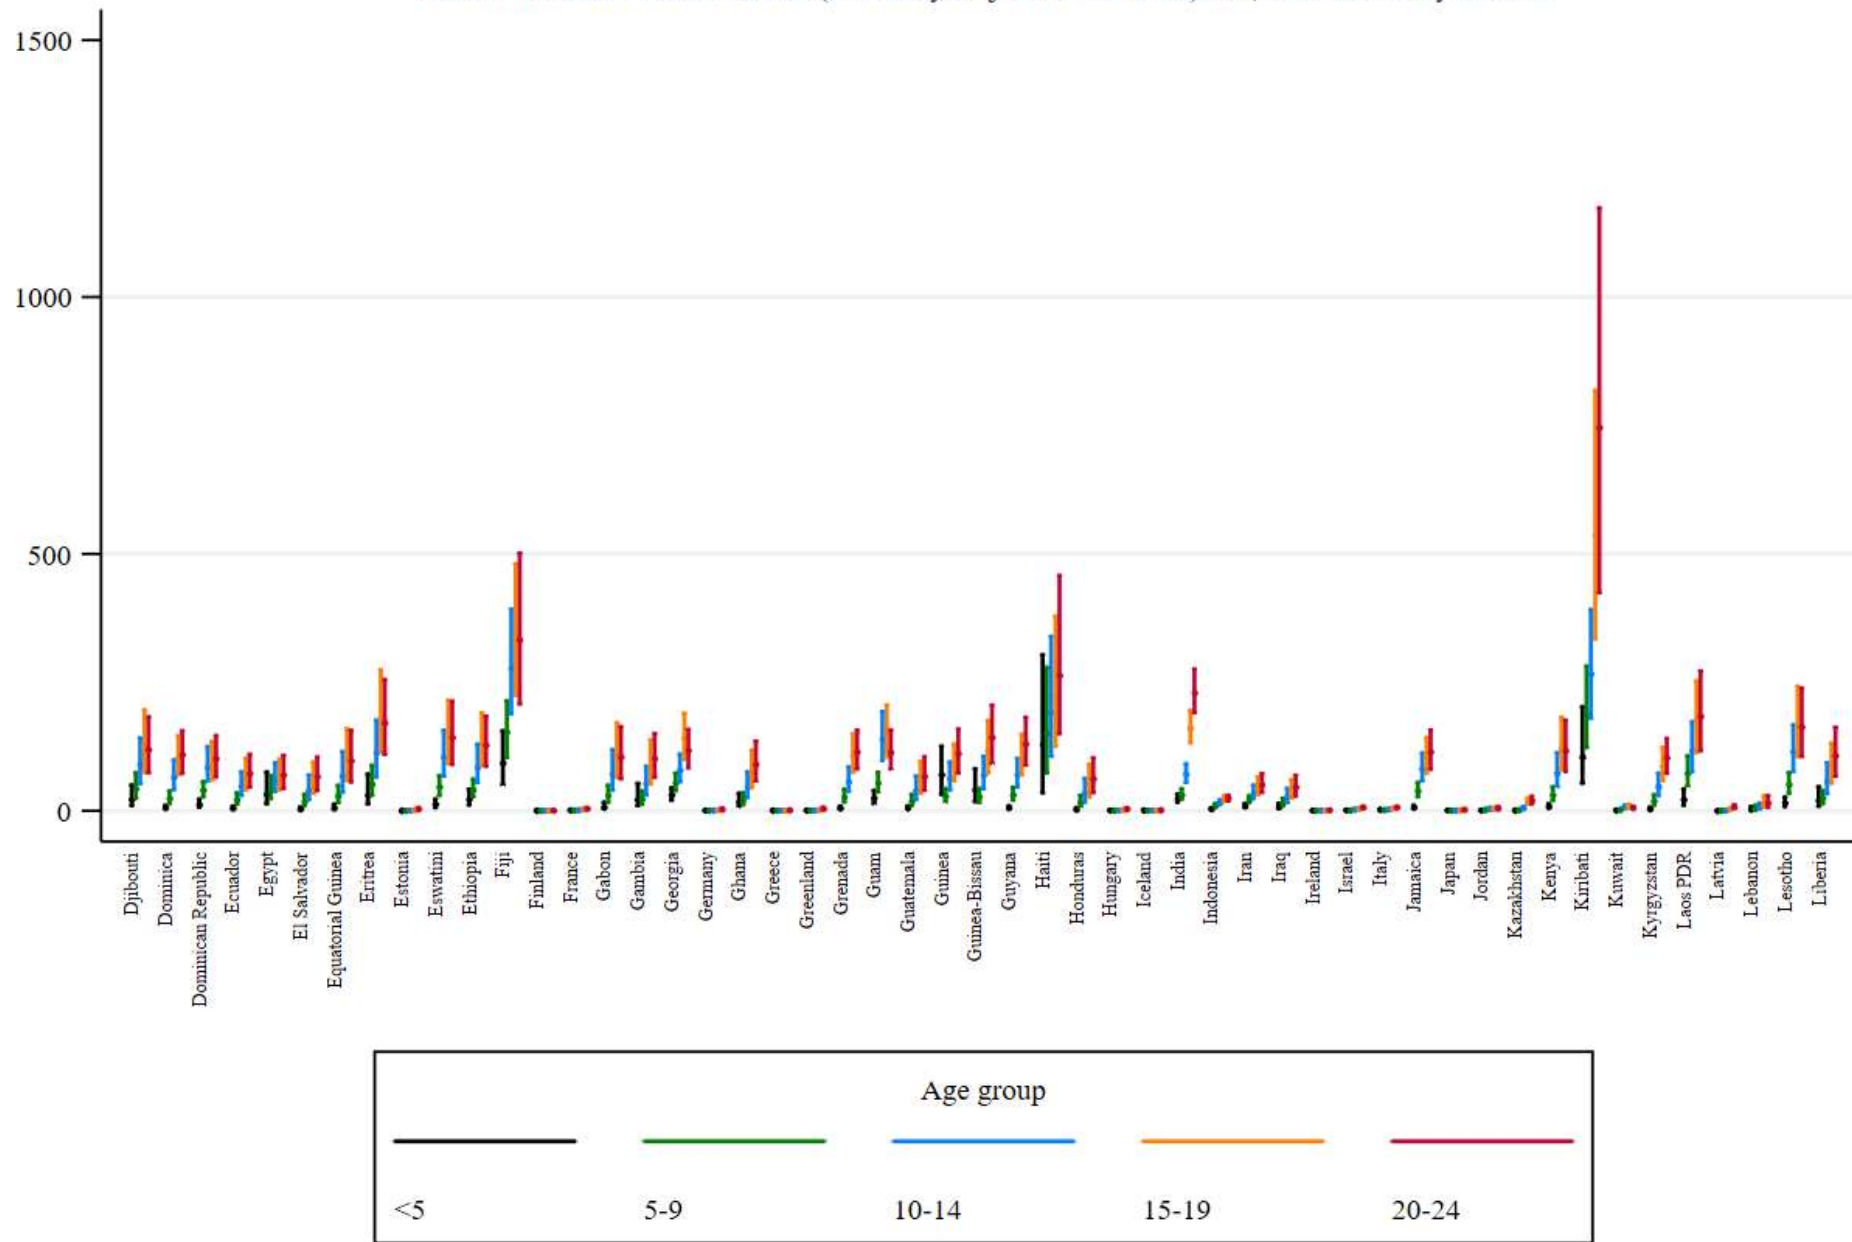



Rheumatic heart disease: DALYs (Disability-Adjusted Life Years)/100,000 Uncertainty interval

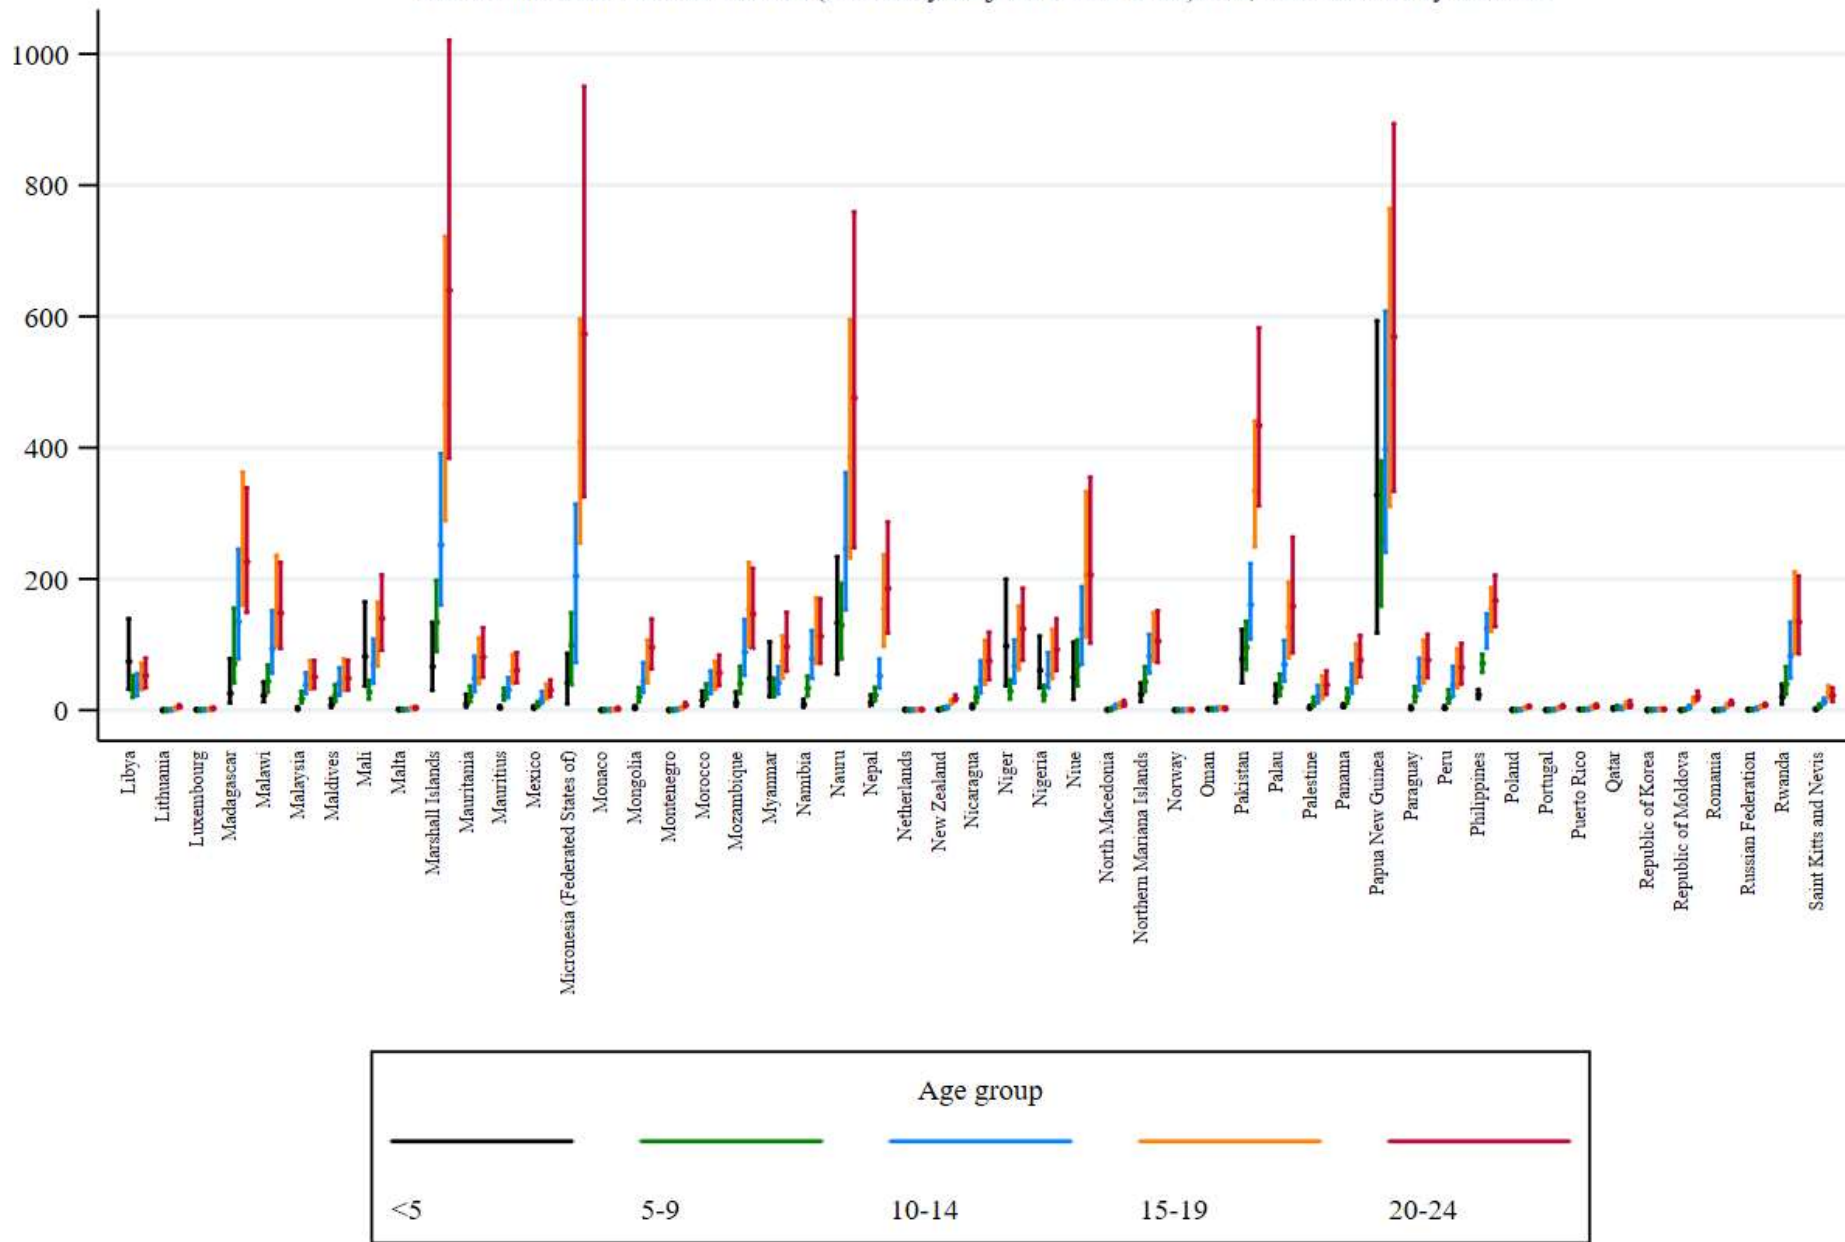

Rheumatic heart disease: DALYs (Disability-Adjusted Life Years)/100,000 Uncertainty interval

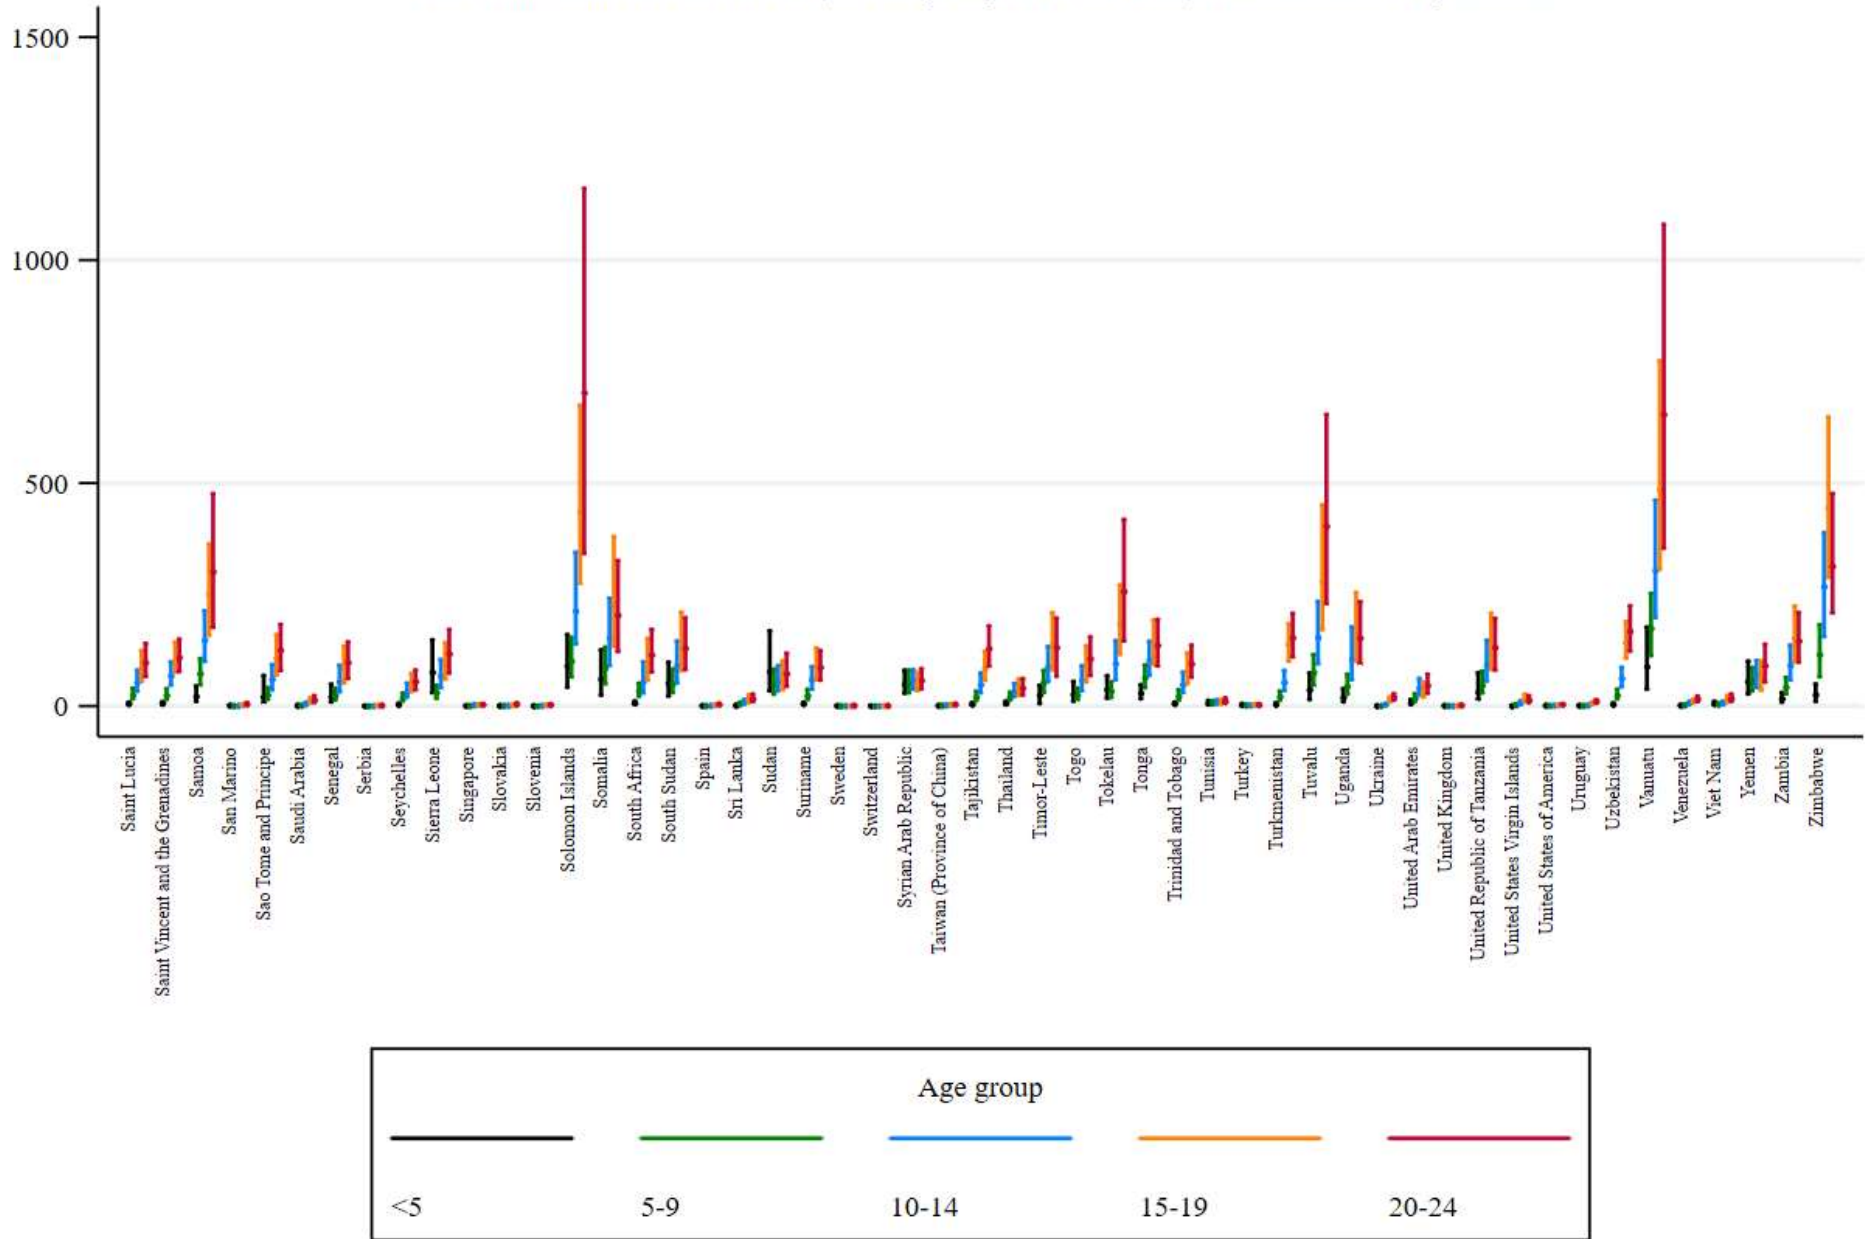

S20\_9 Part A: Sexually transmitted infections excluding HIV Deaths/ 100 000 Uncertainty interval for each age group

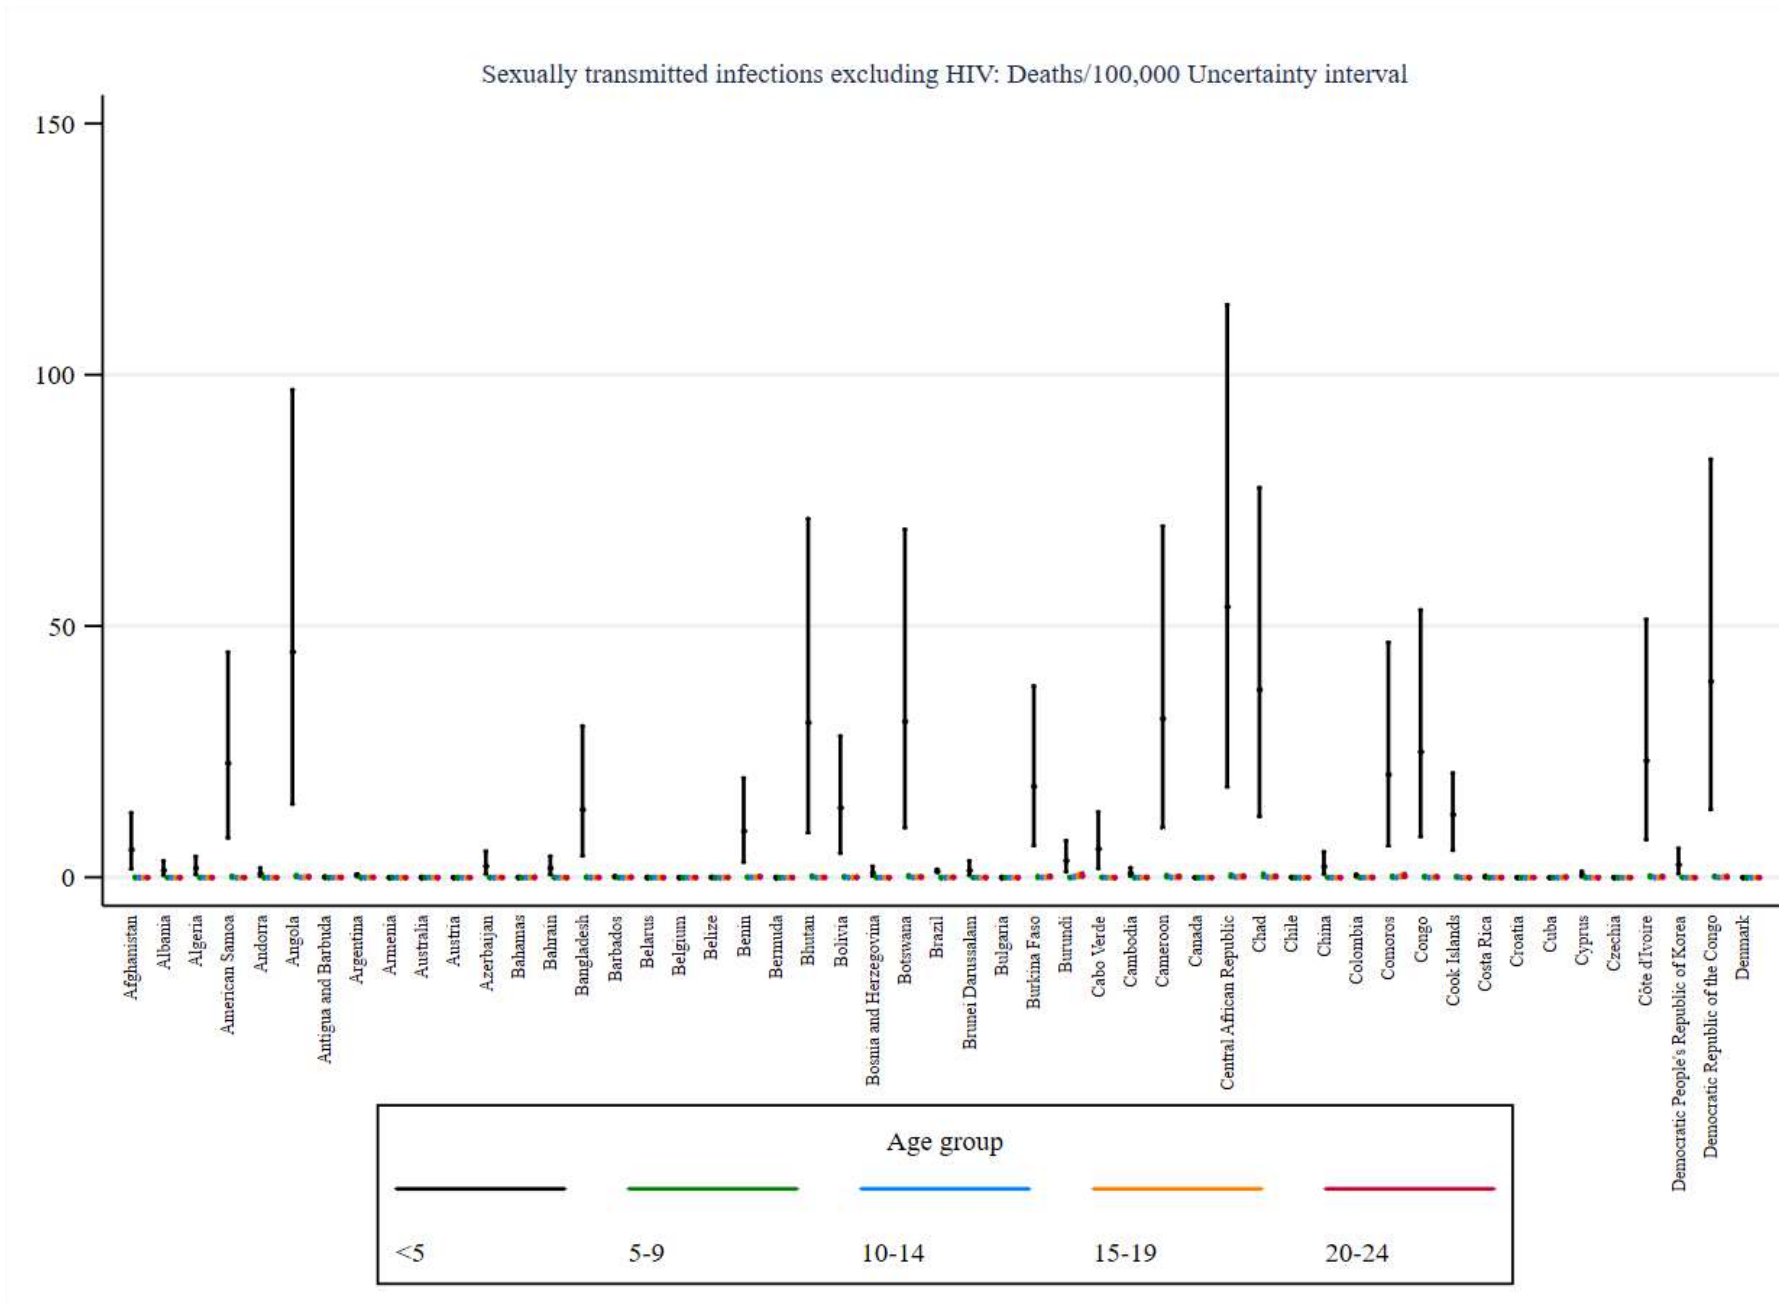

Sexually transmitted infections excluding HIV: Deaths/100,000 Uncertainty interval

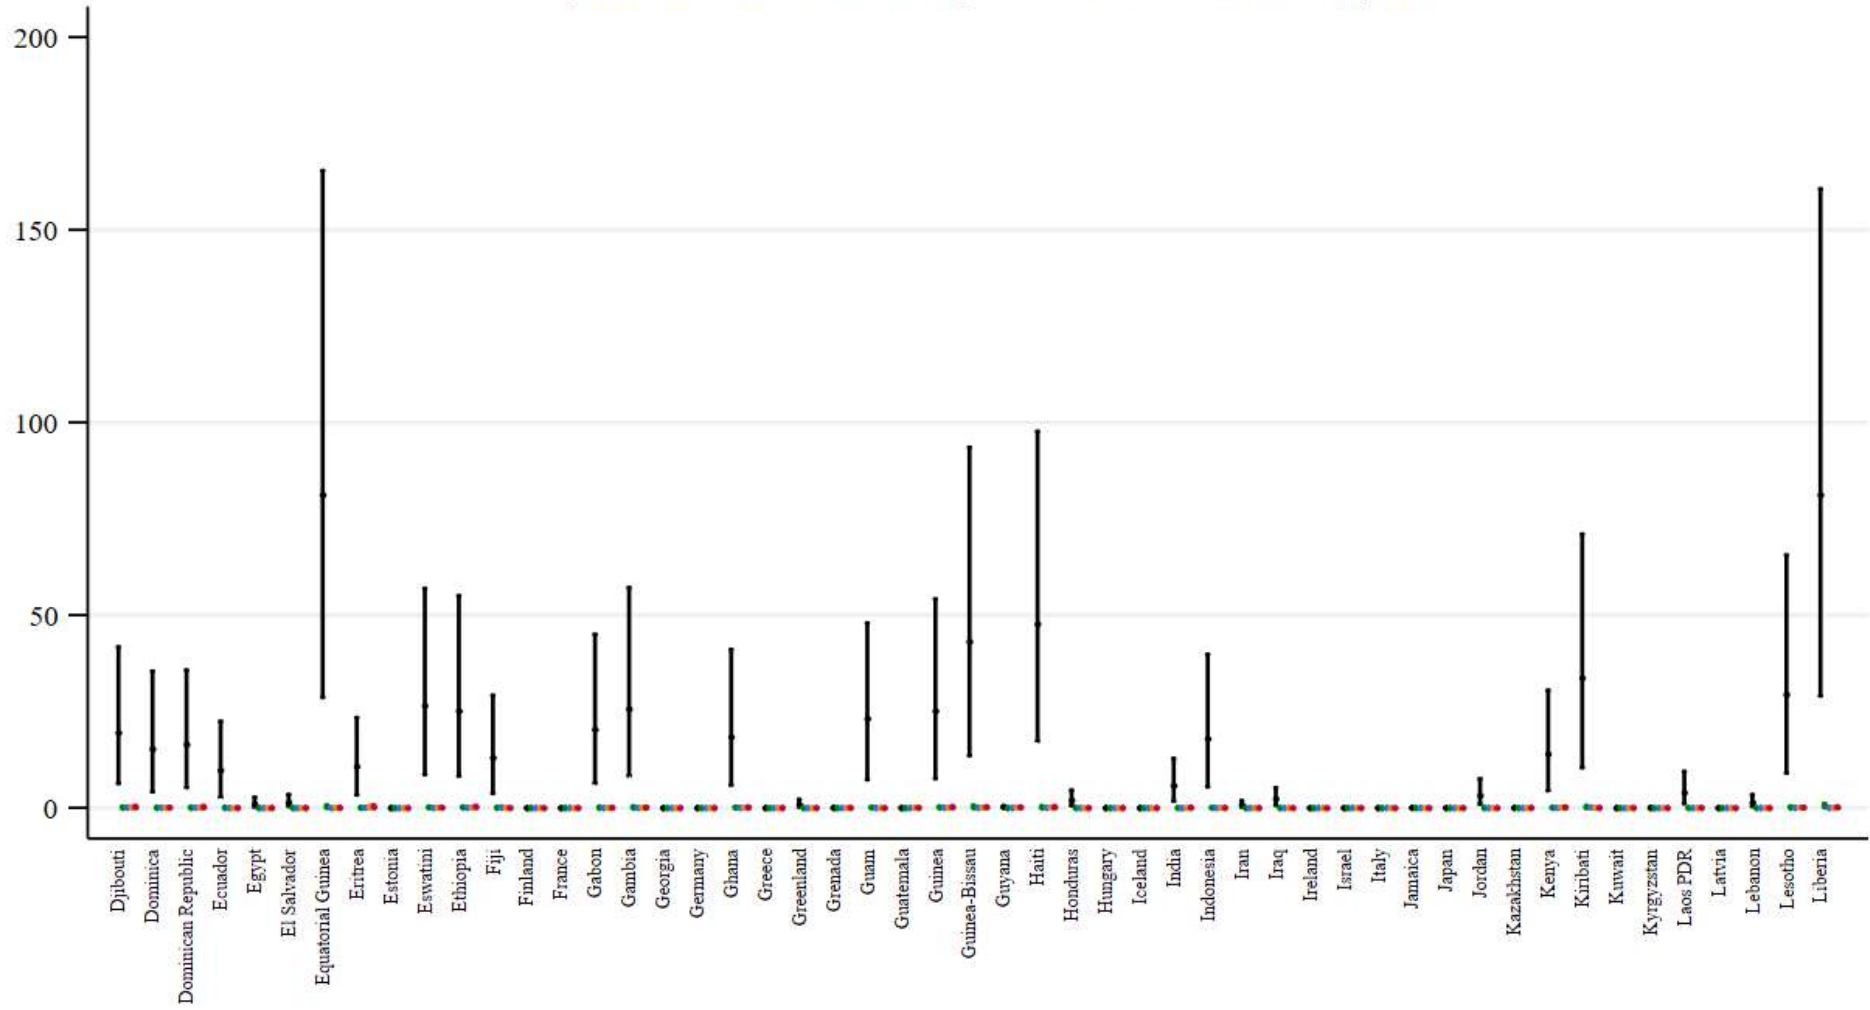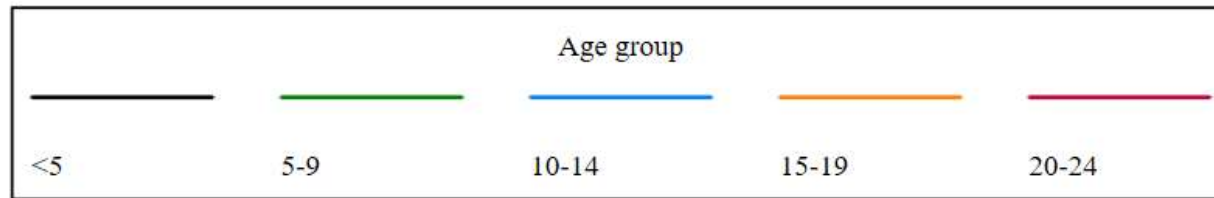

Sexually transmitted infections excluding HIV: Deaths/100,000 Uncertainty interval

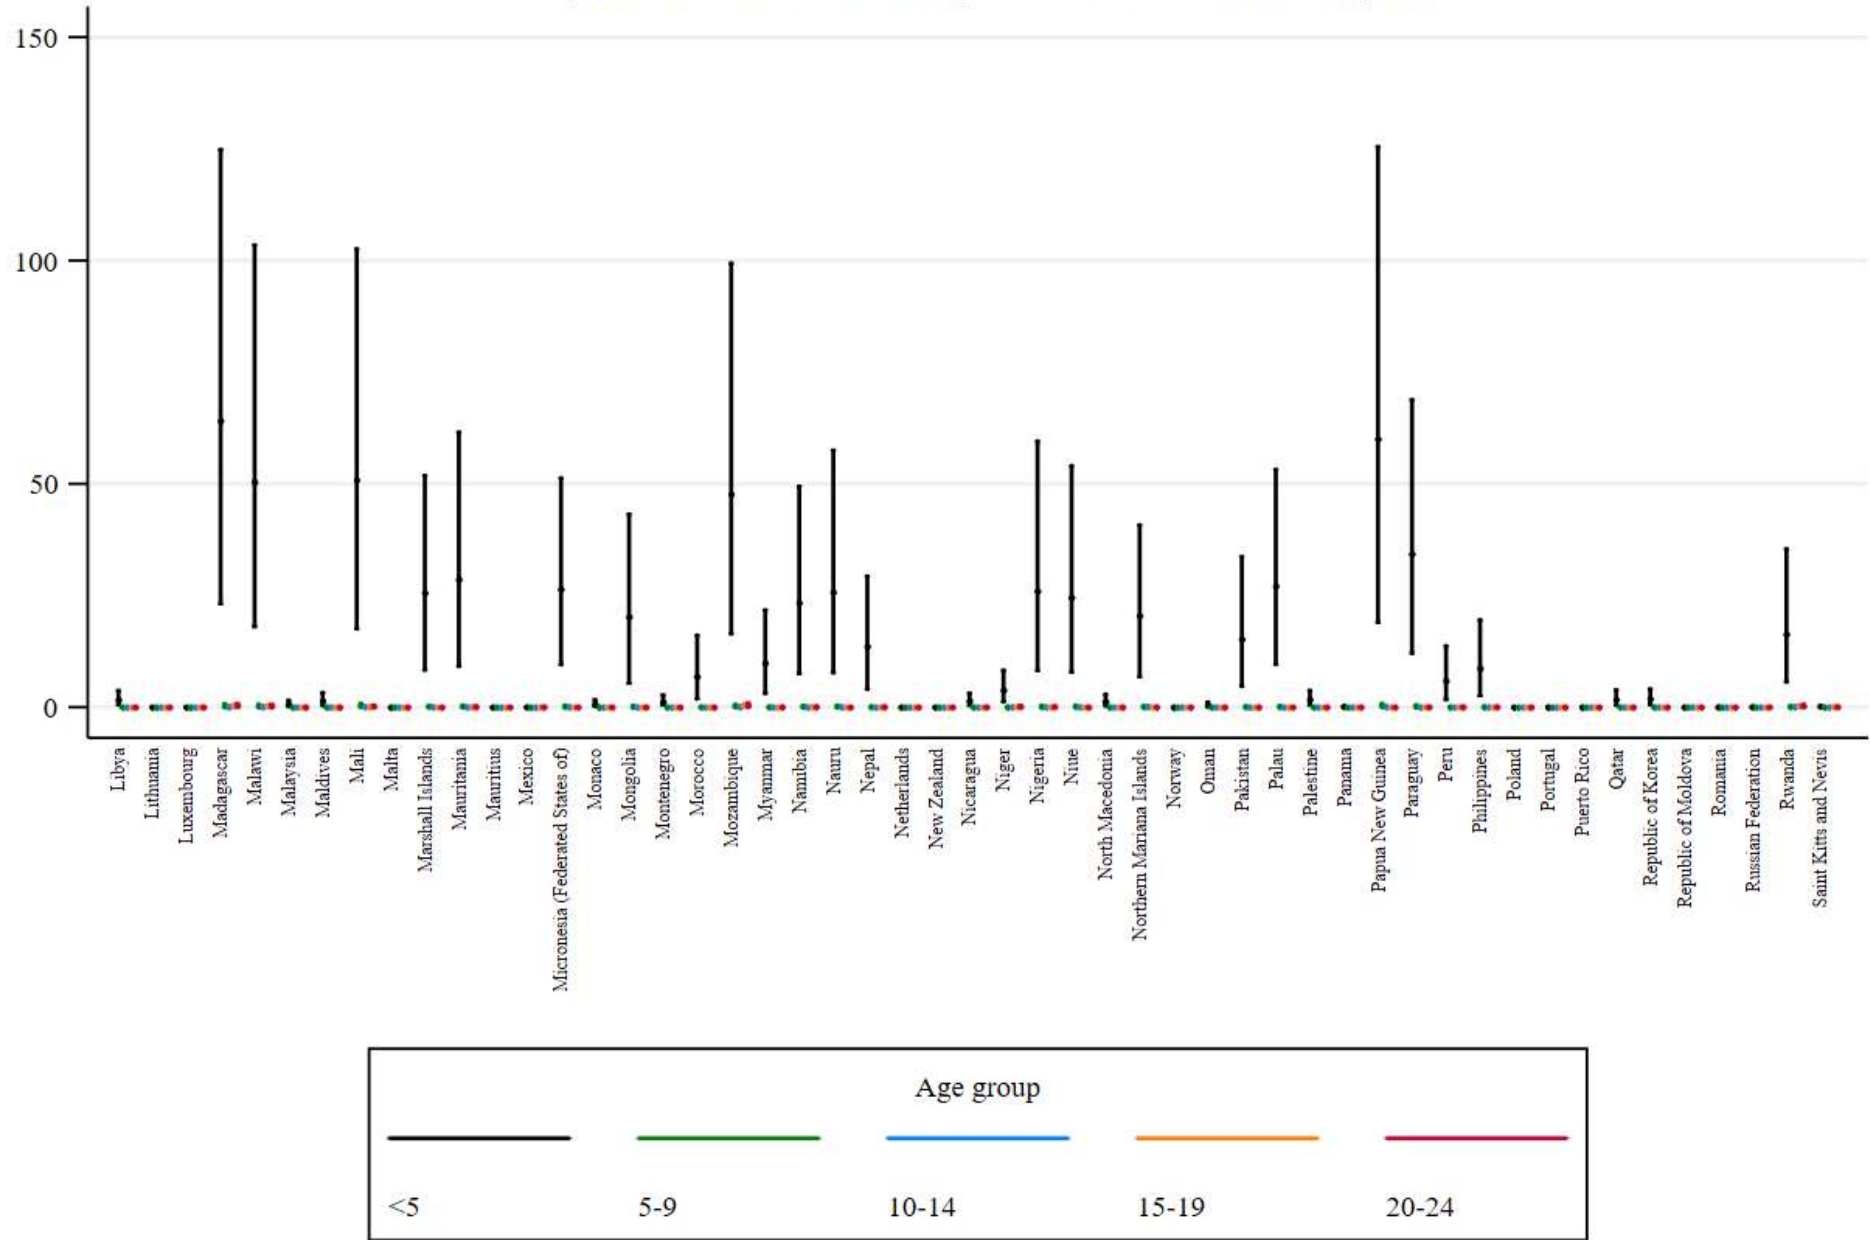

Sexually transmitted infections excluding HIV: Deaths/100,000 Uncertainty interval

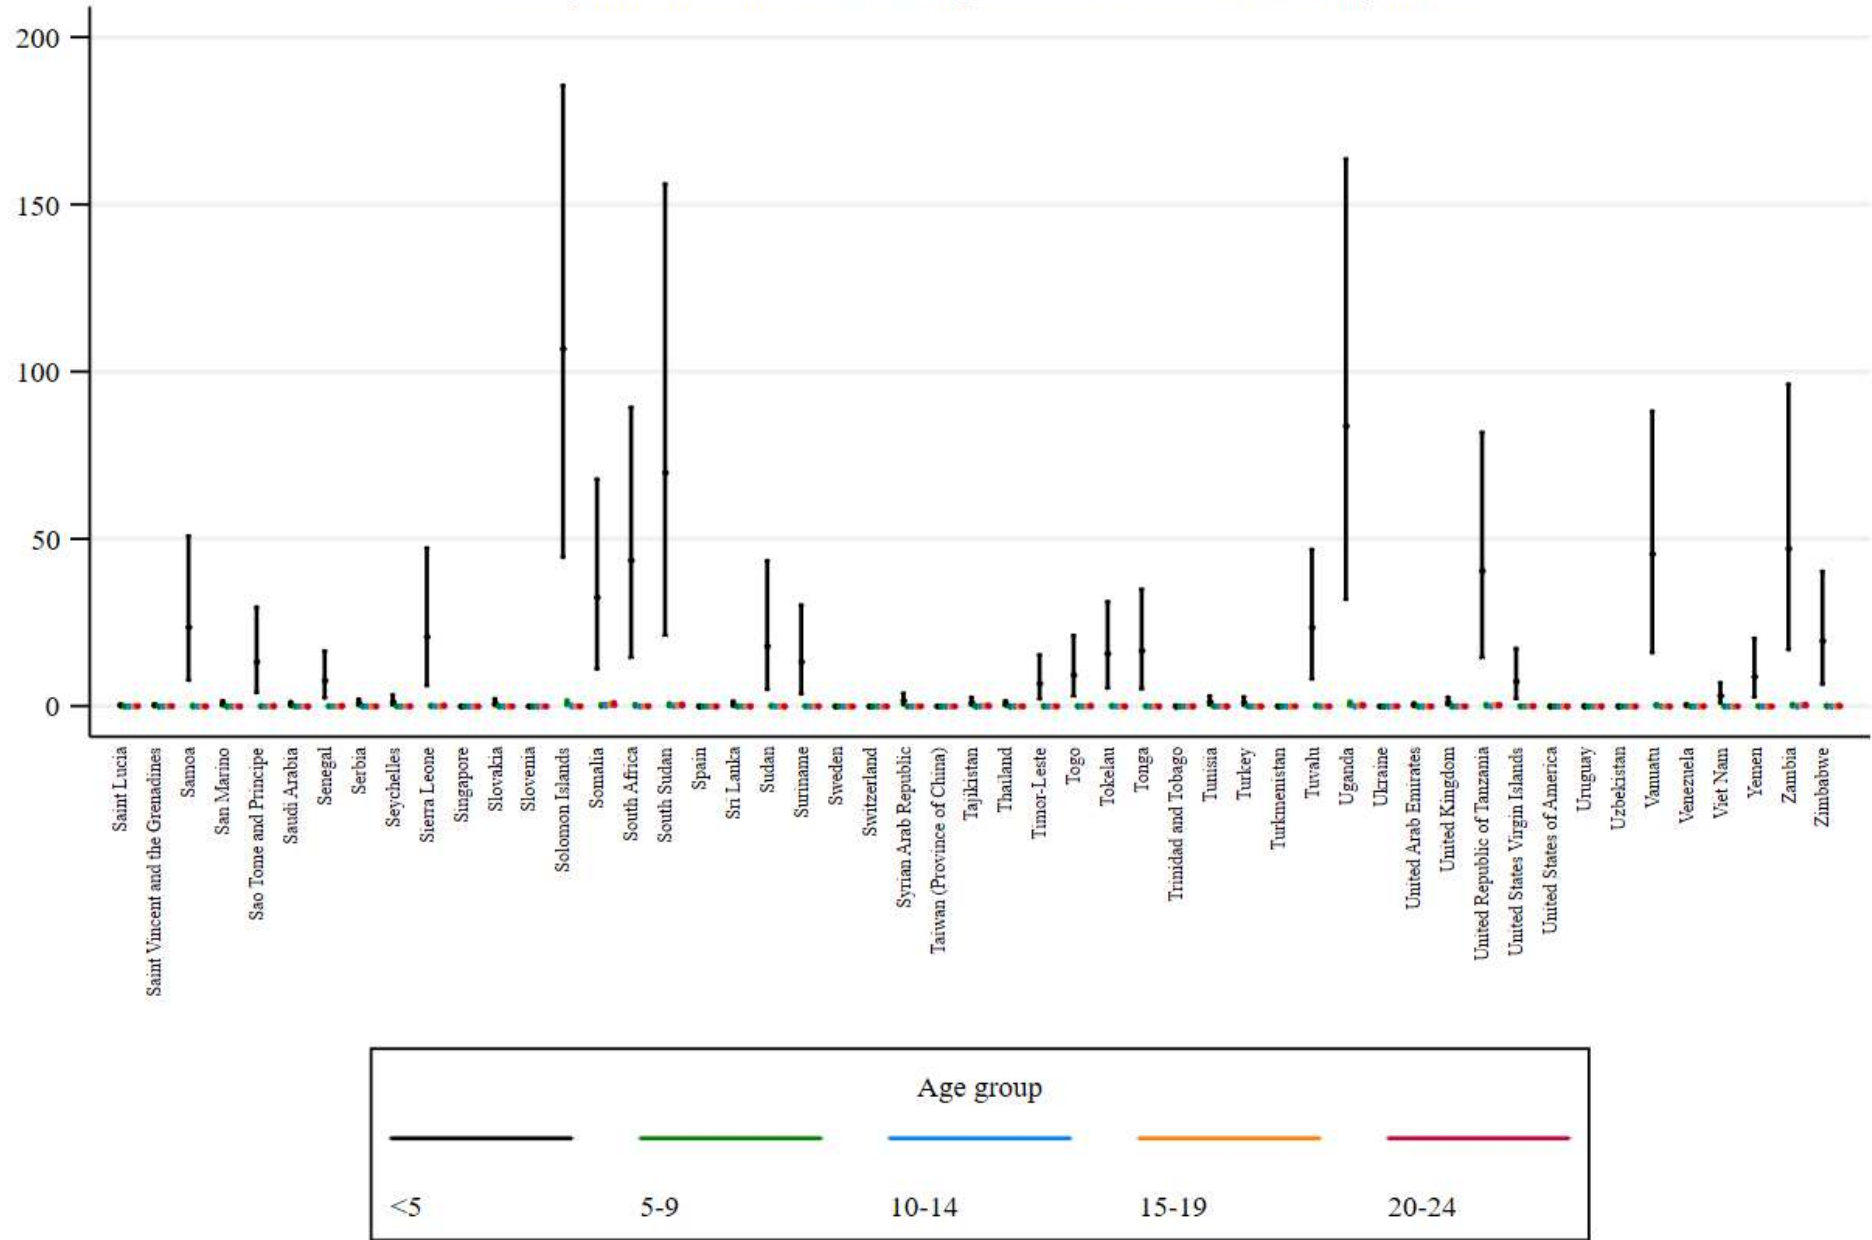

S20\_9 Part B: Sexually transmitted infections excluding HIV DALYs/ 100 000 Uncertainty interval for each age group

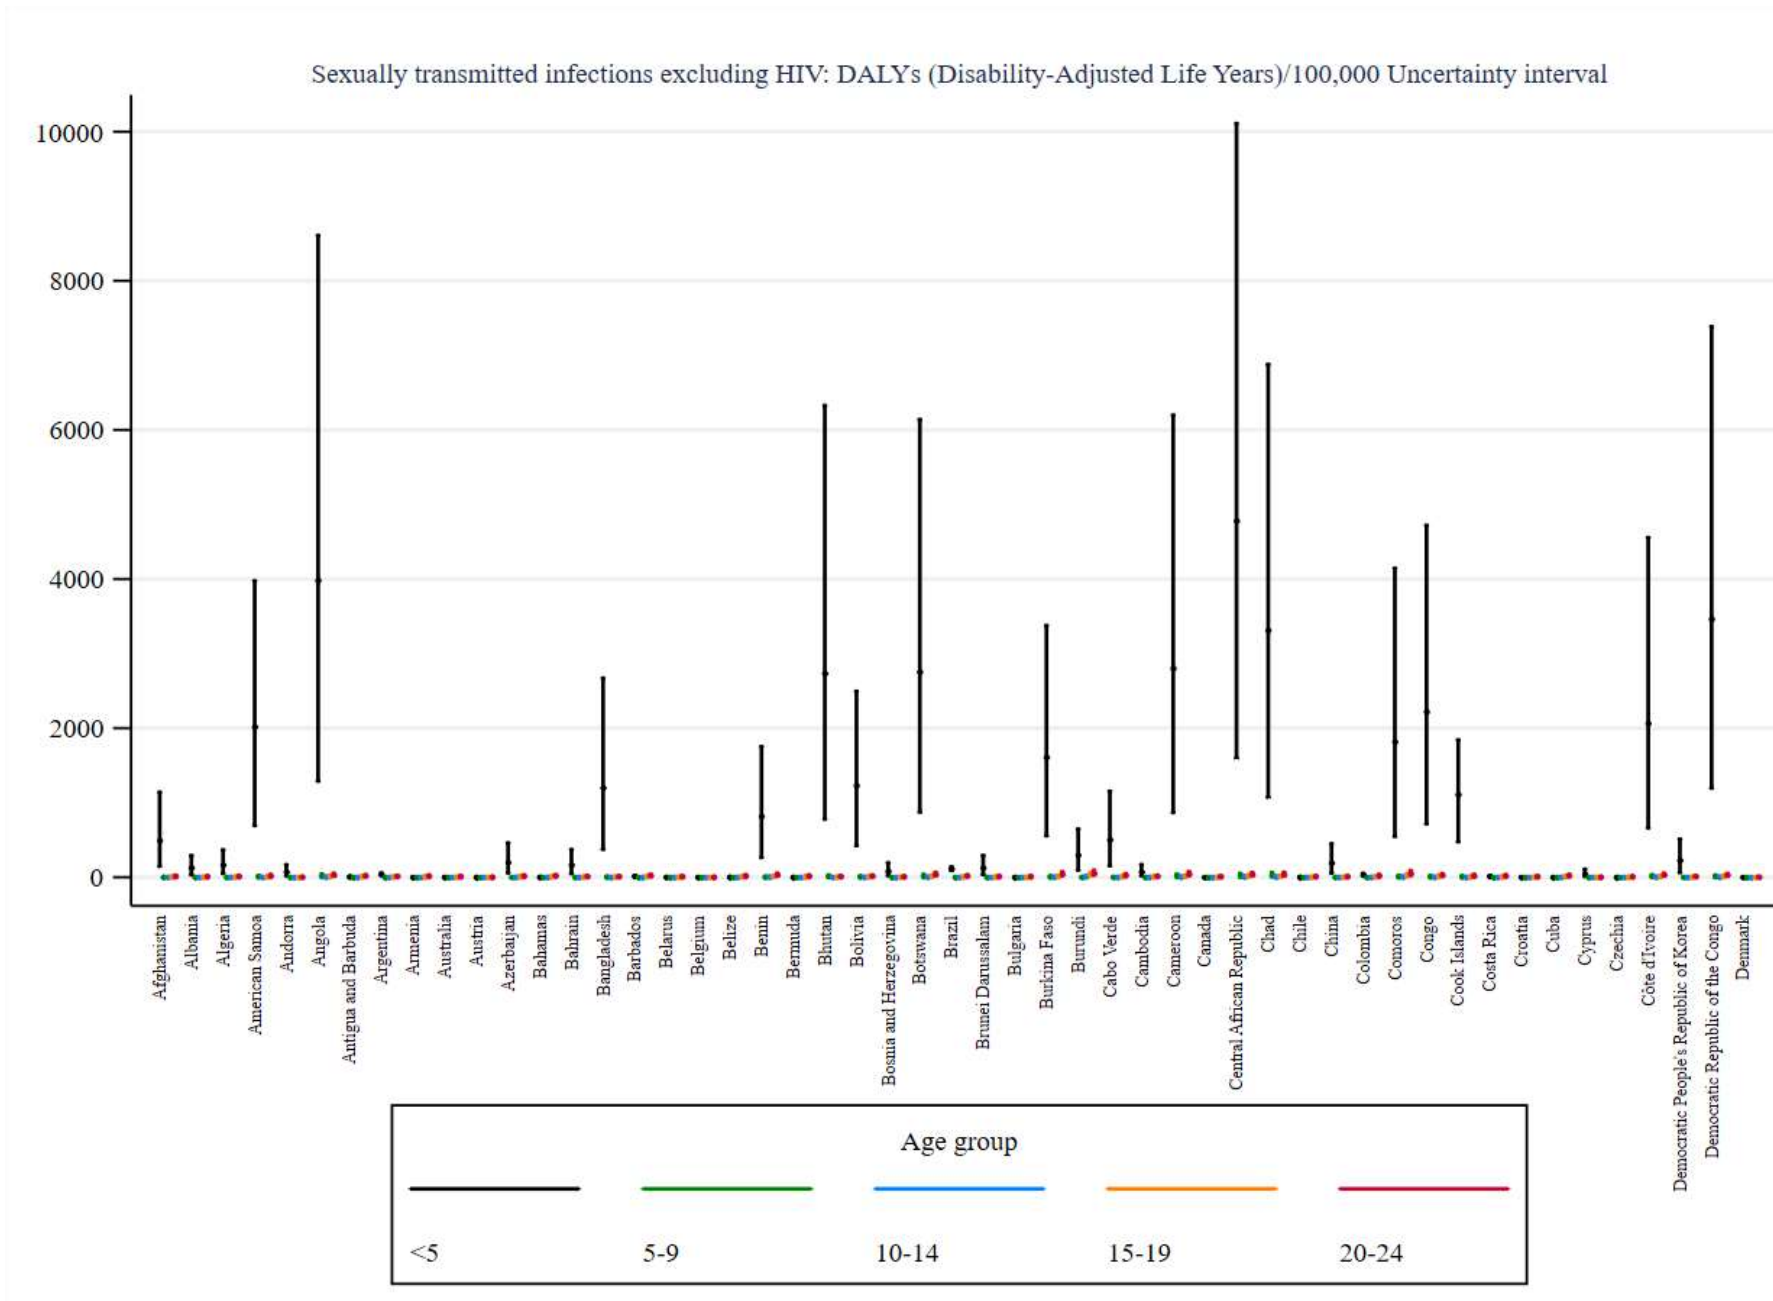

Sexually transmitted infections excluding HIV: DALYs (Disability-Adjusted Life Years)/100,000 Uncertainty interval

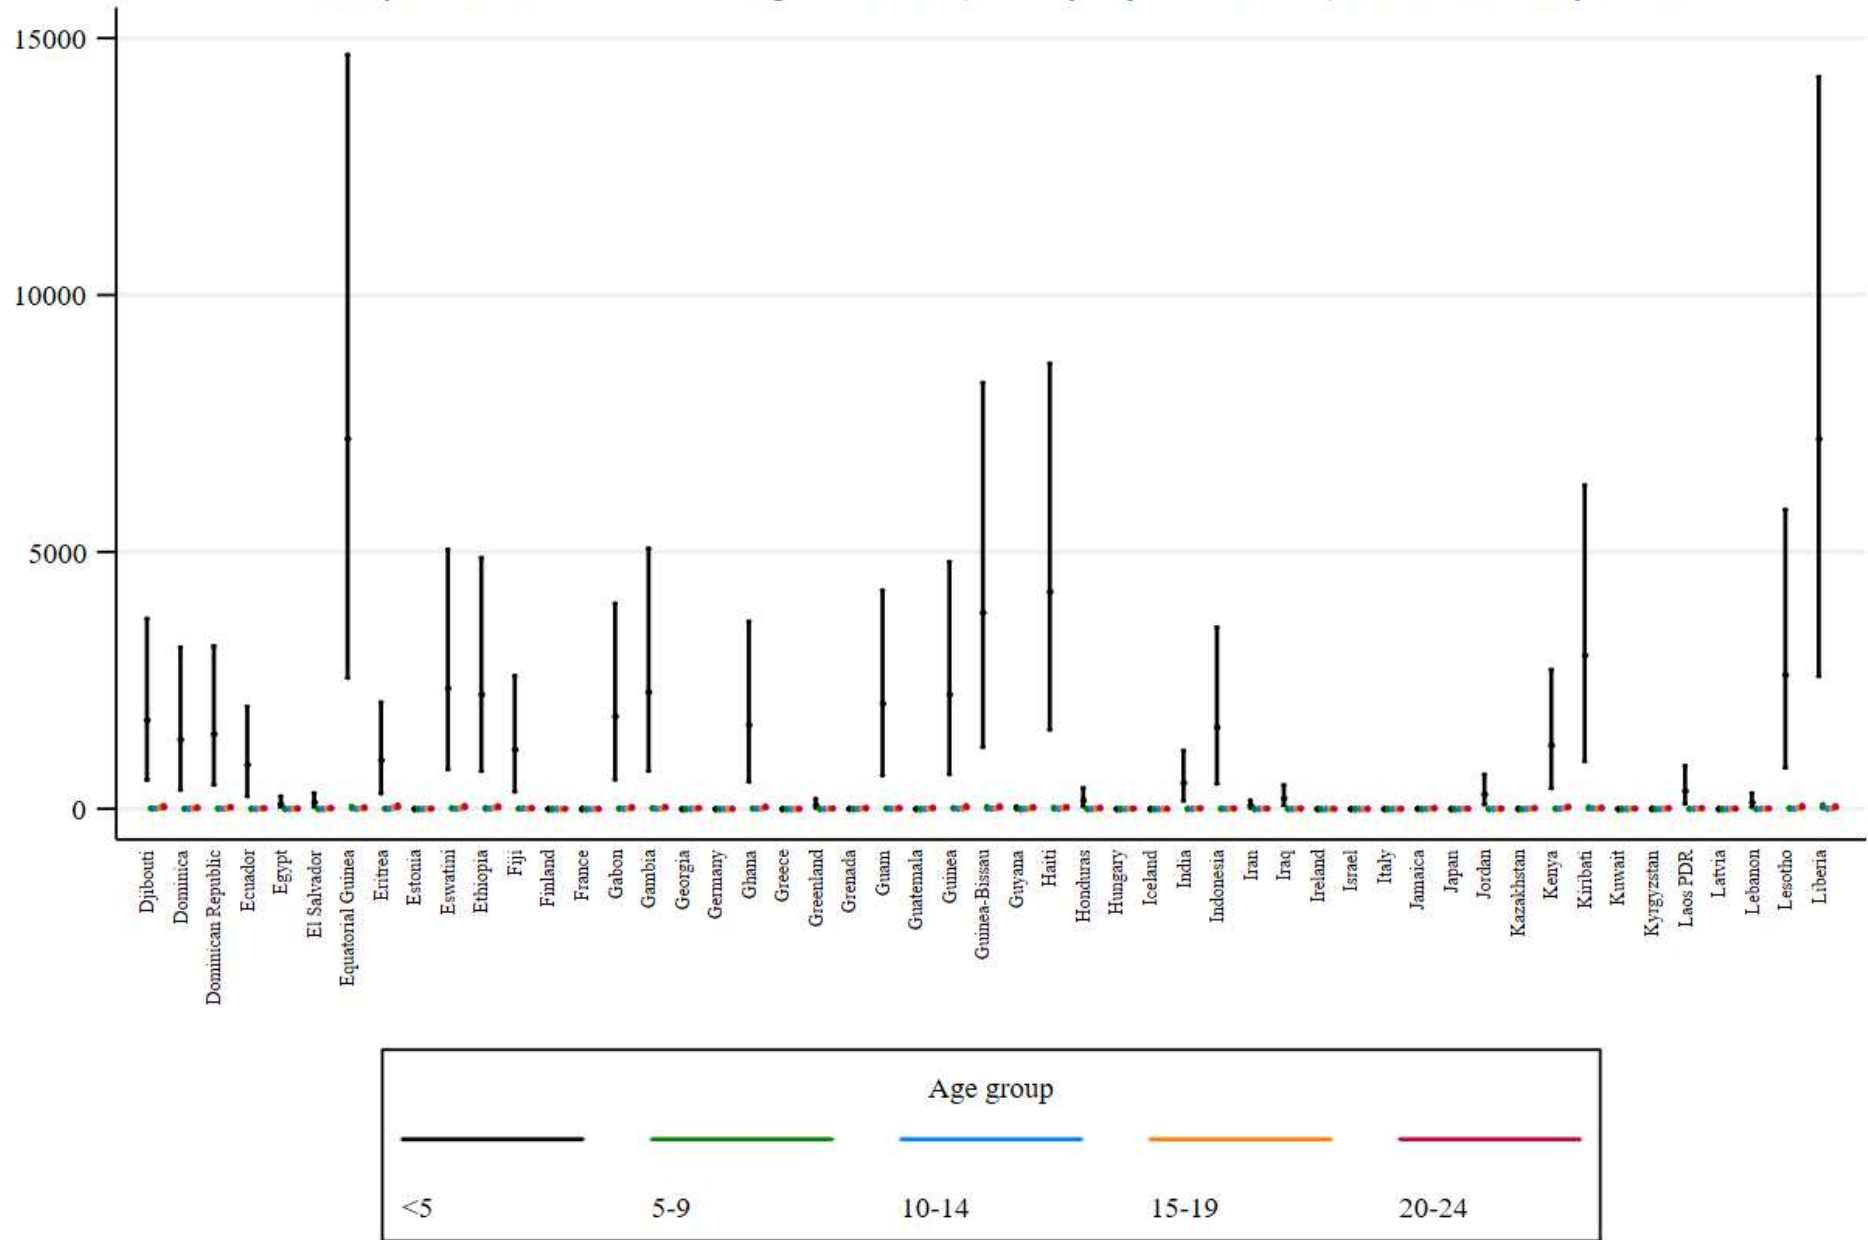



Sexually transmitted infections excluding HIV: DALYs (Disability-Adjusted Life Years)/100,000 Uncertainty interval

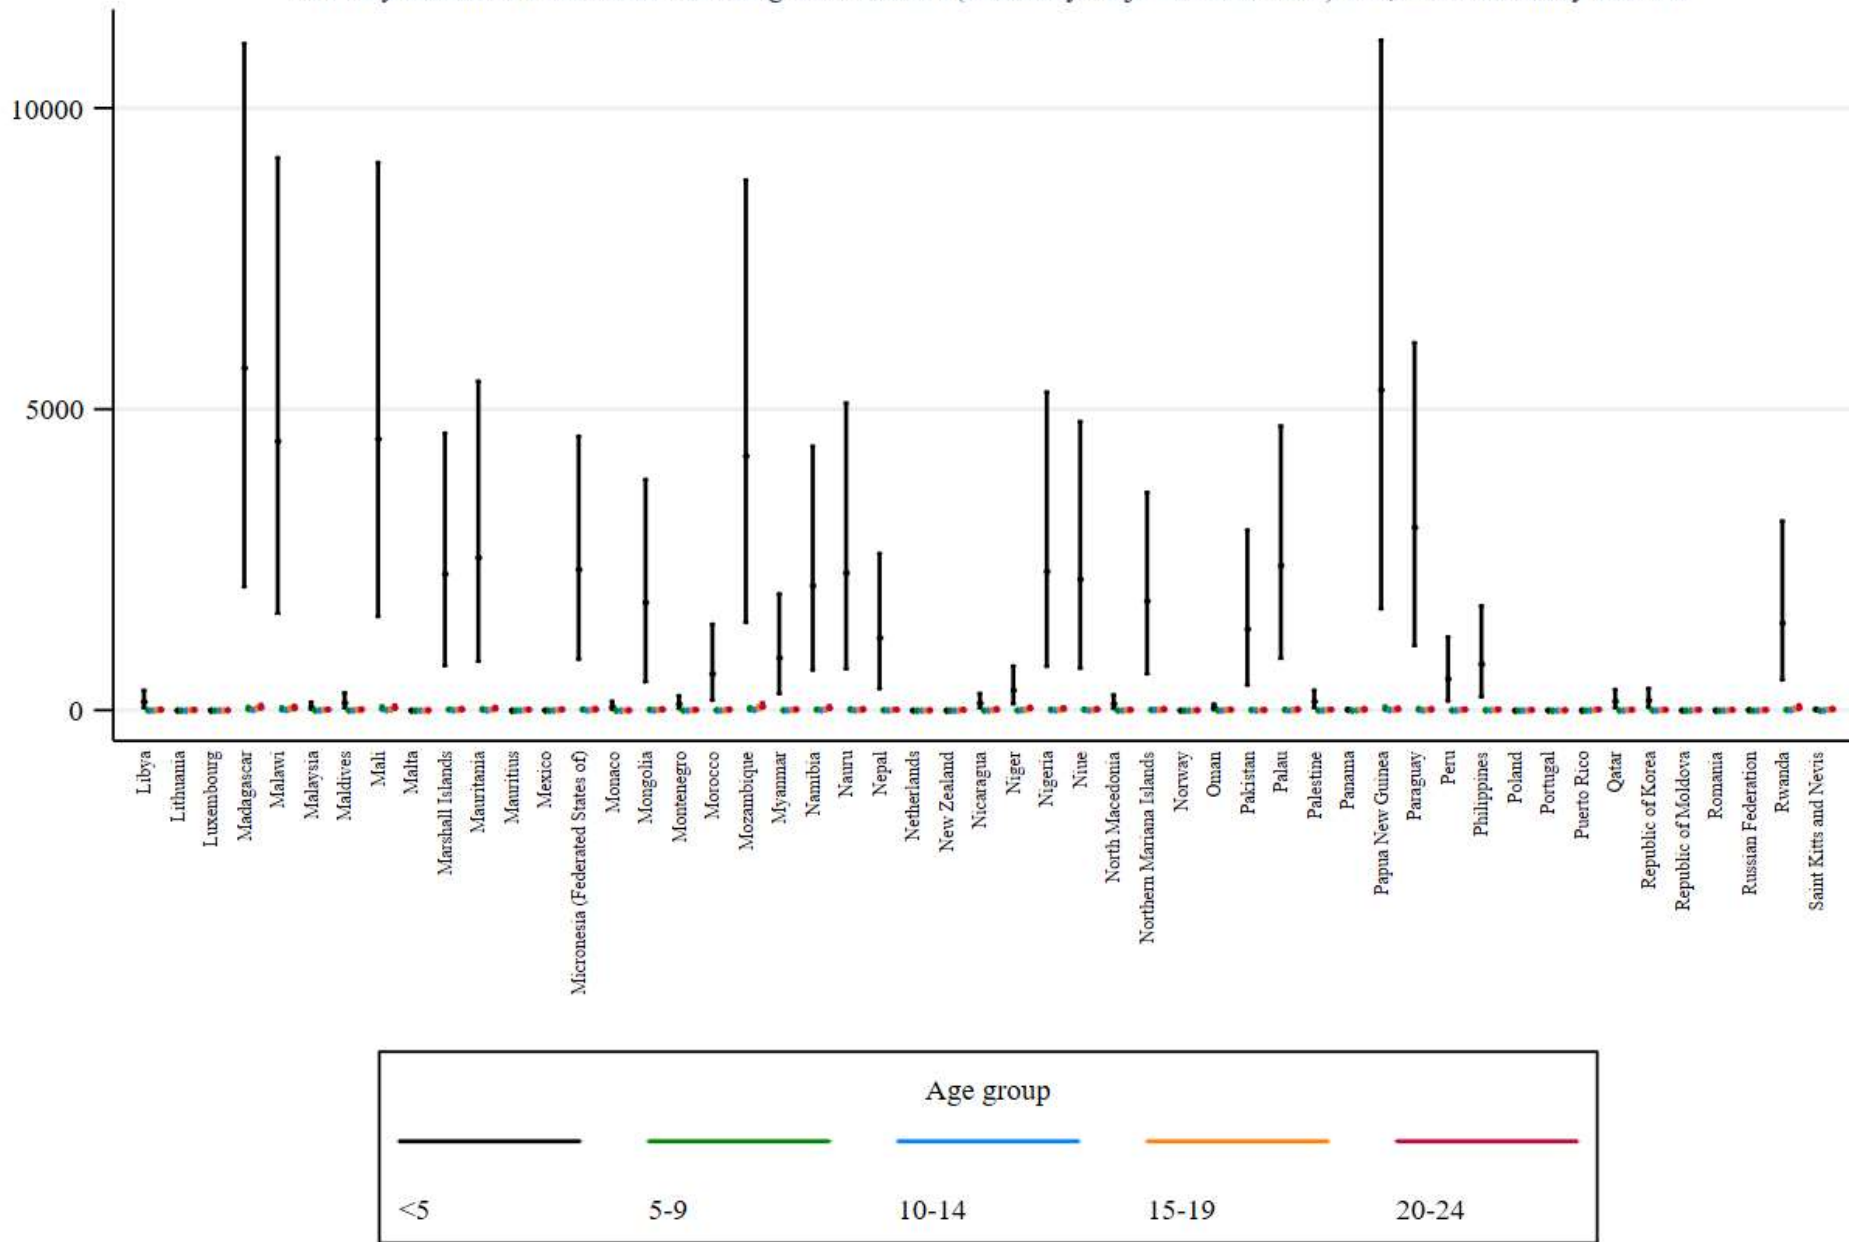

Sexually transmitted infections excluding HIV: DALYs (Disability-Adjusted Life Years)/100,000 Uncertainty interval

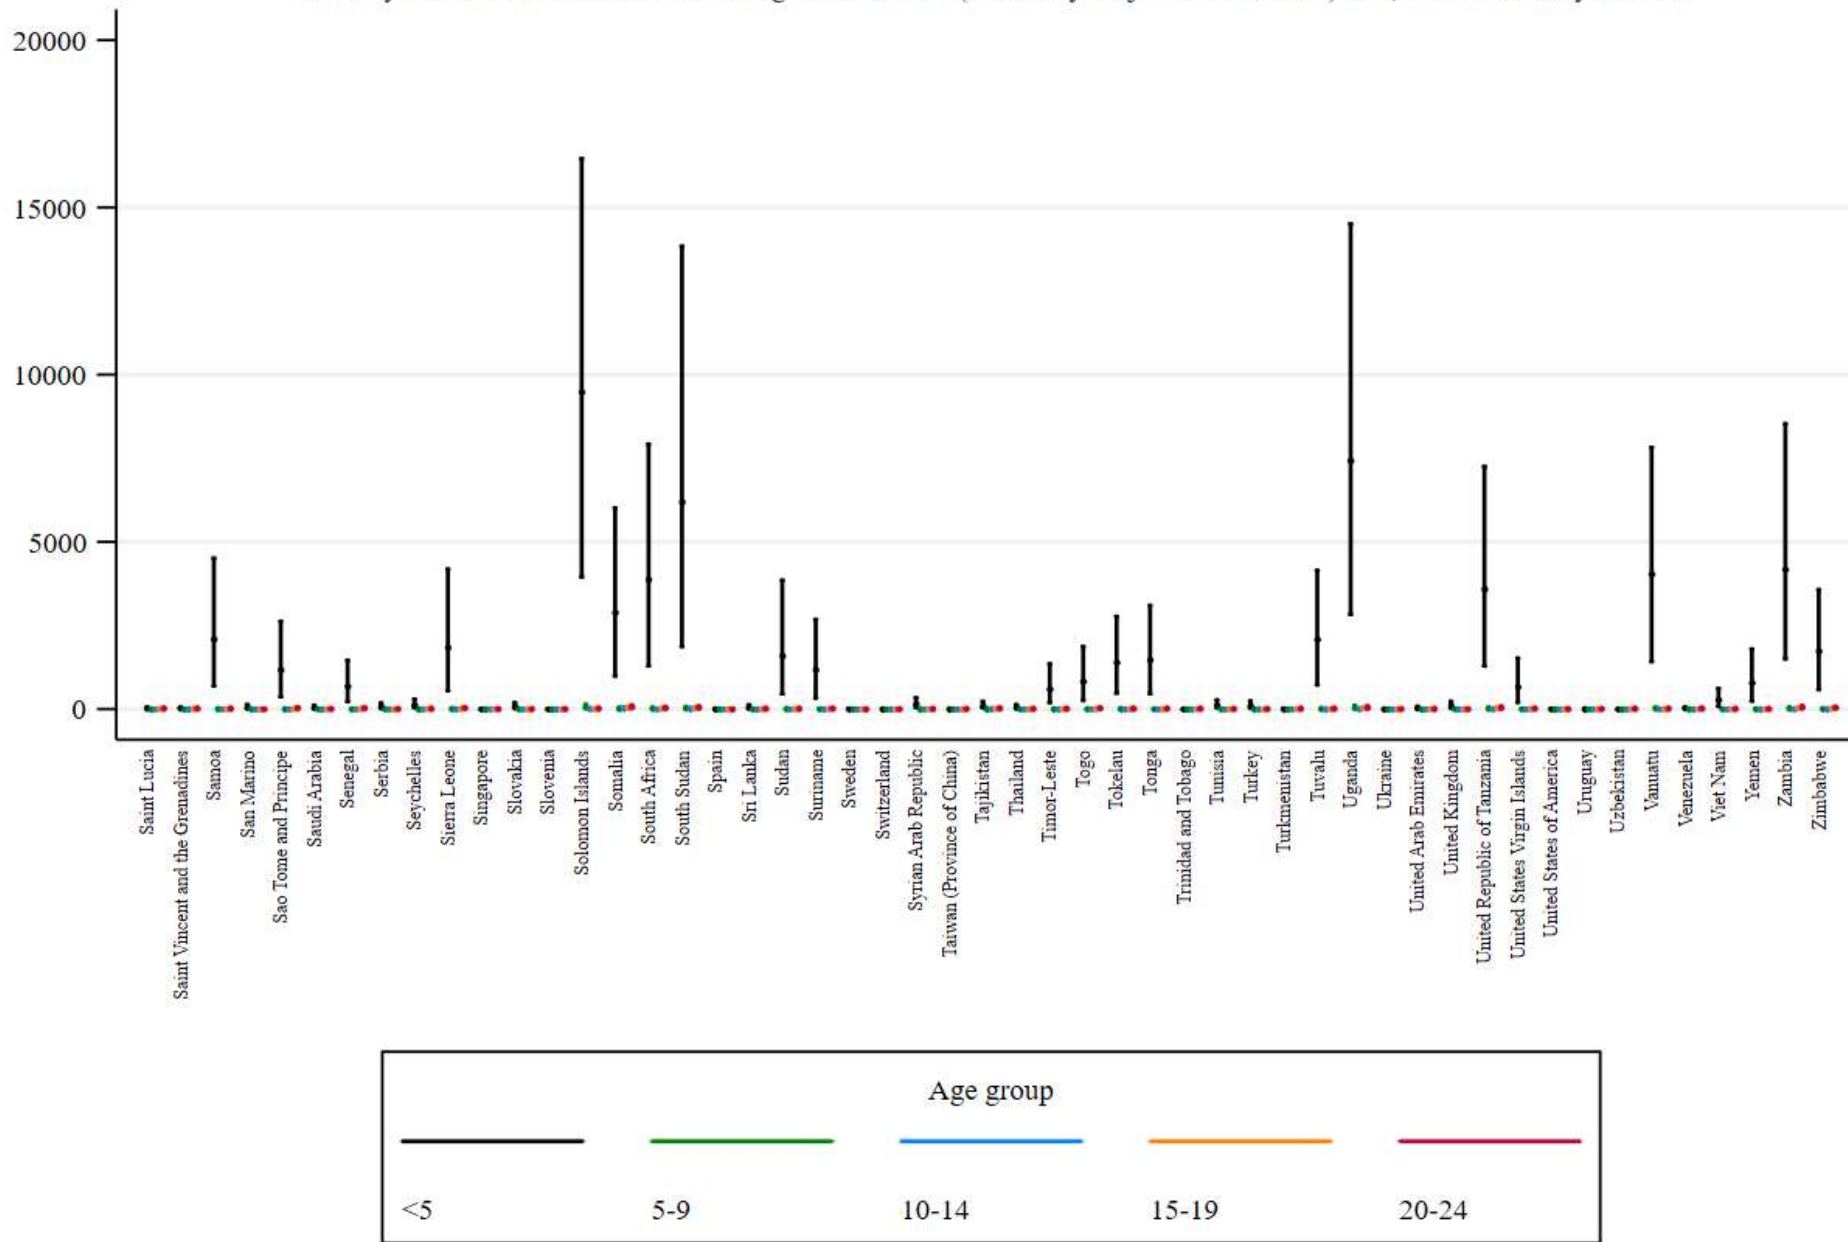

S20\_10 Part A: Tuberculosis Deaths/ 100 000 Uncertainty interval for each age group

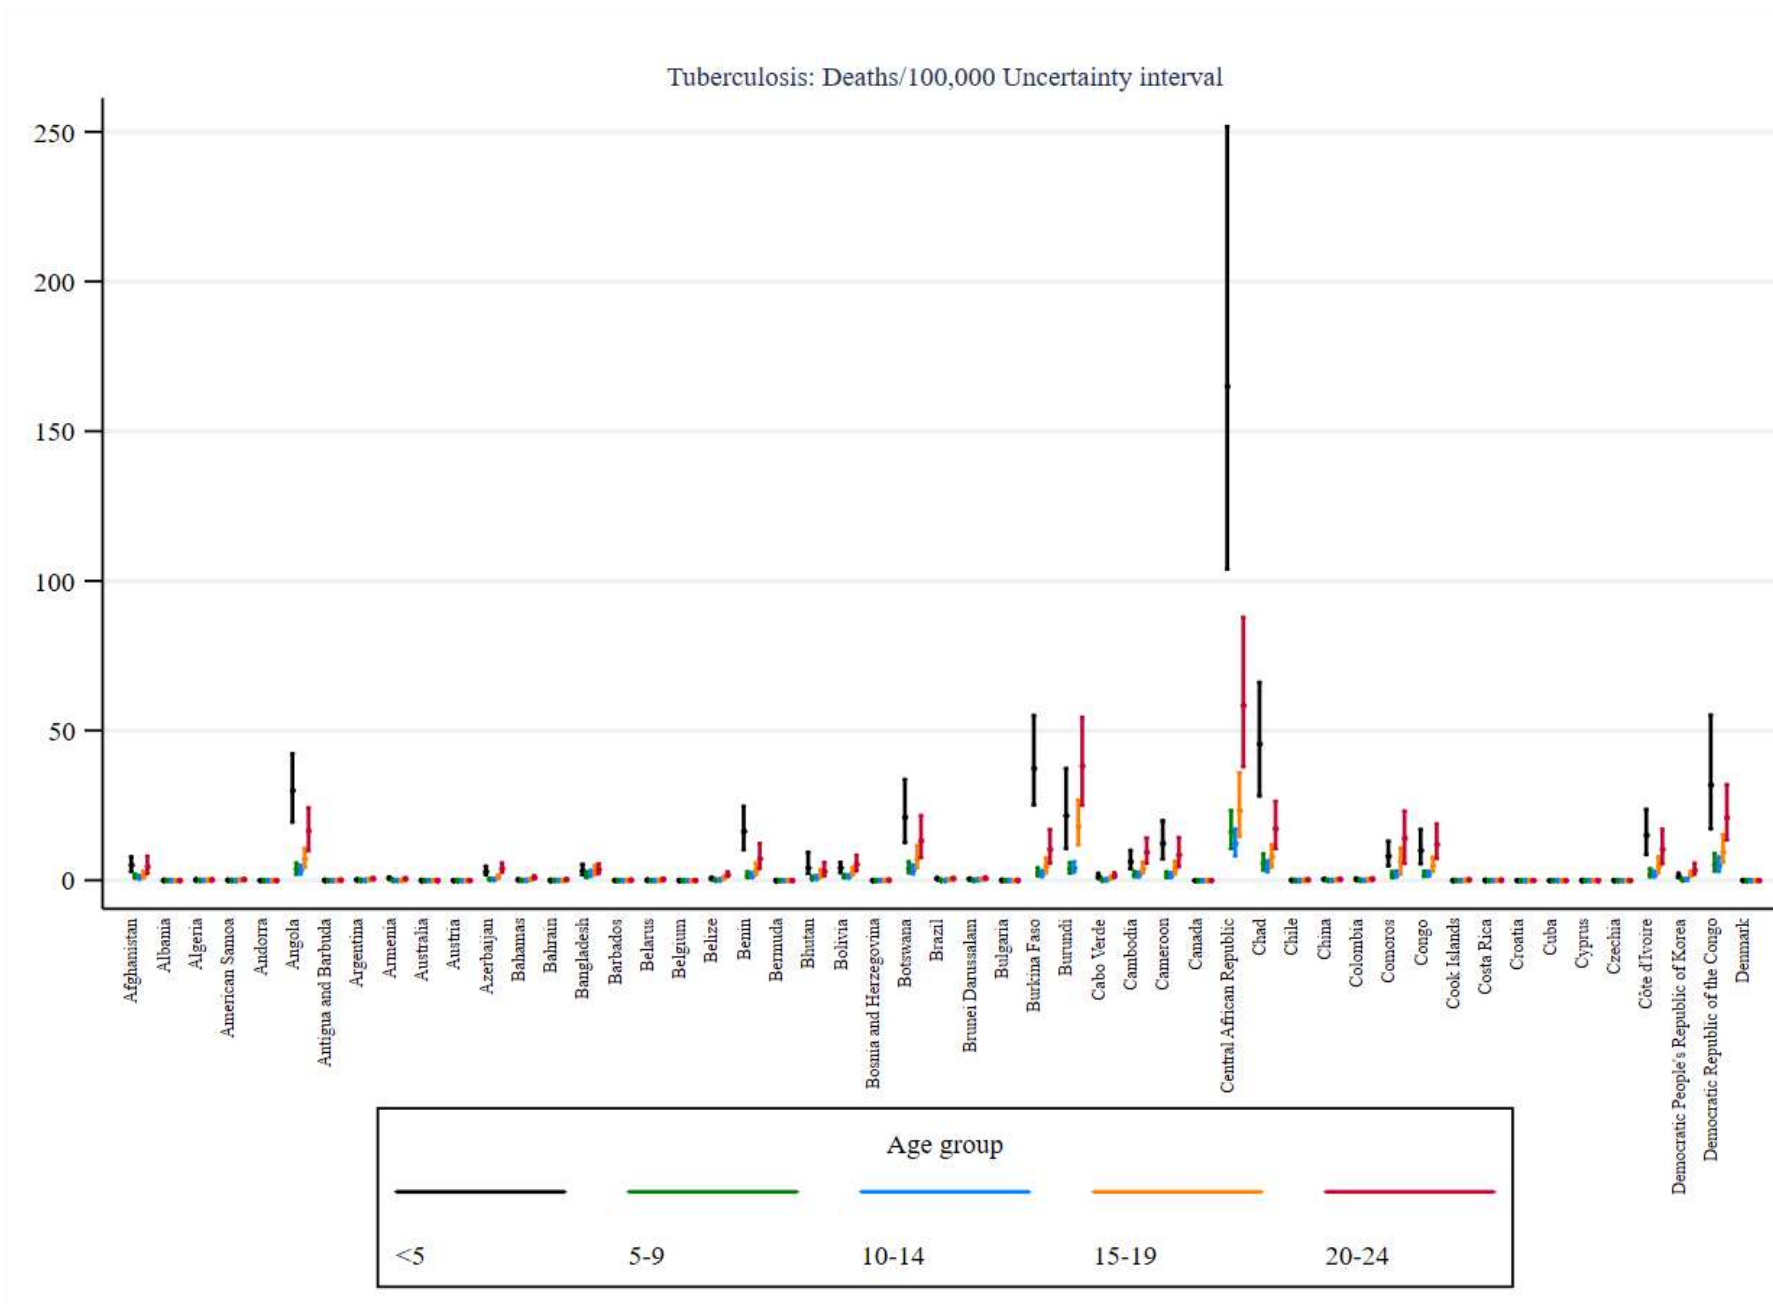

Tuberculosis: Deaths/100,000 Uncertainty interval

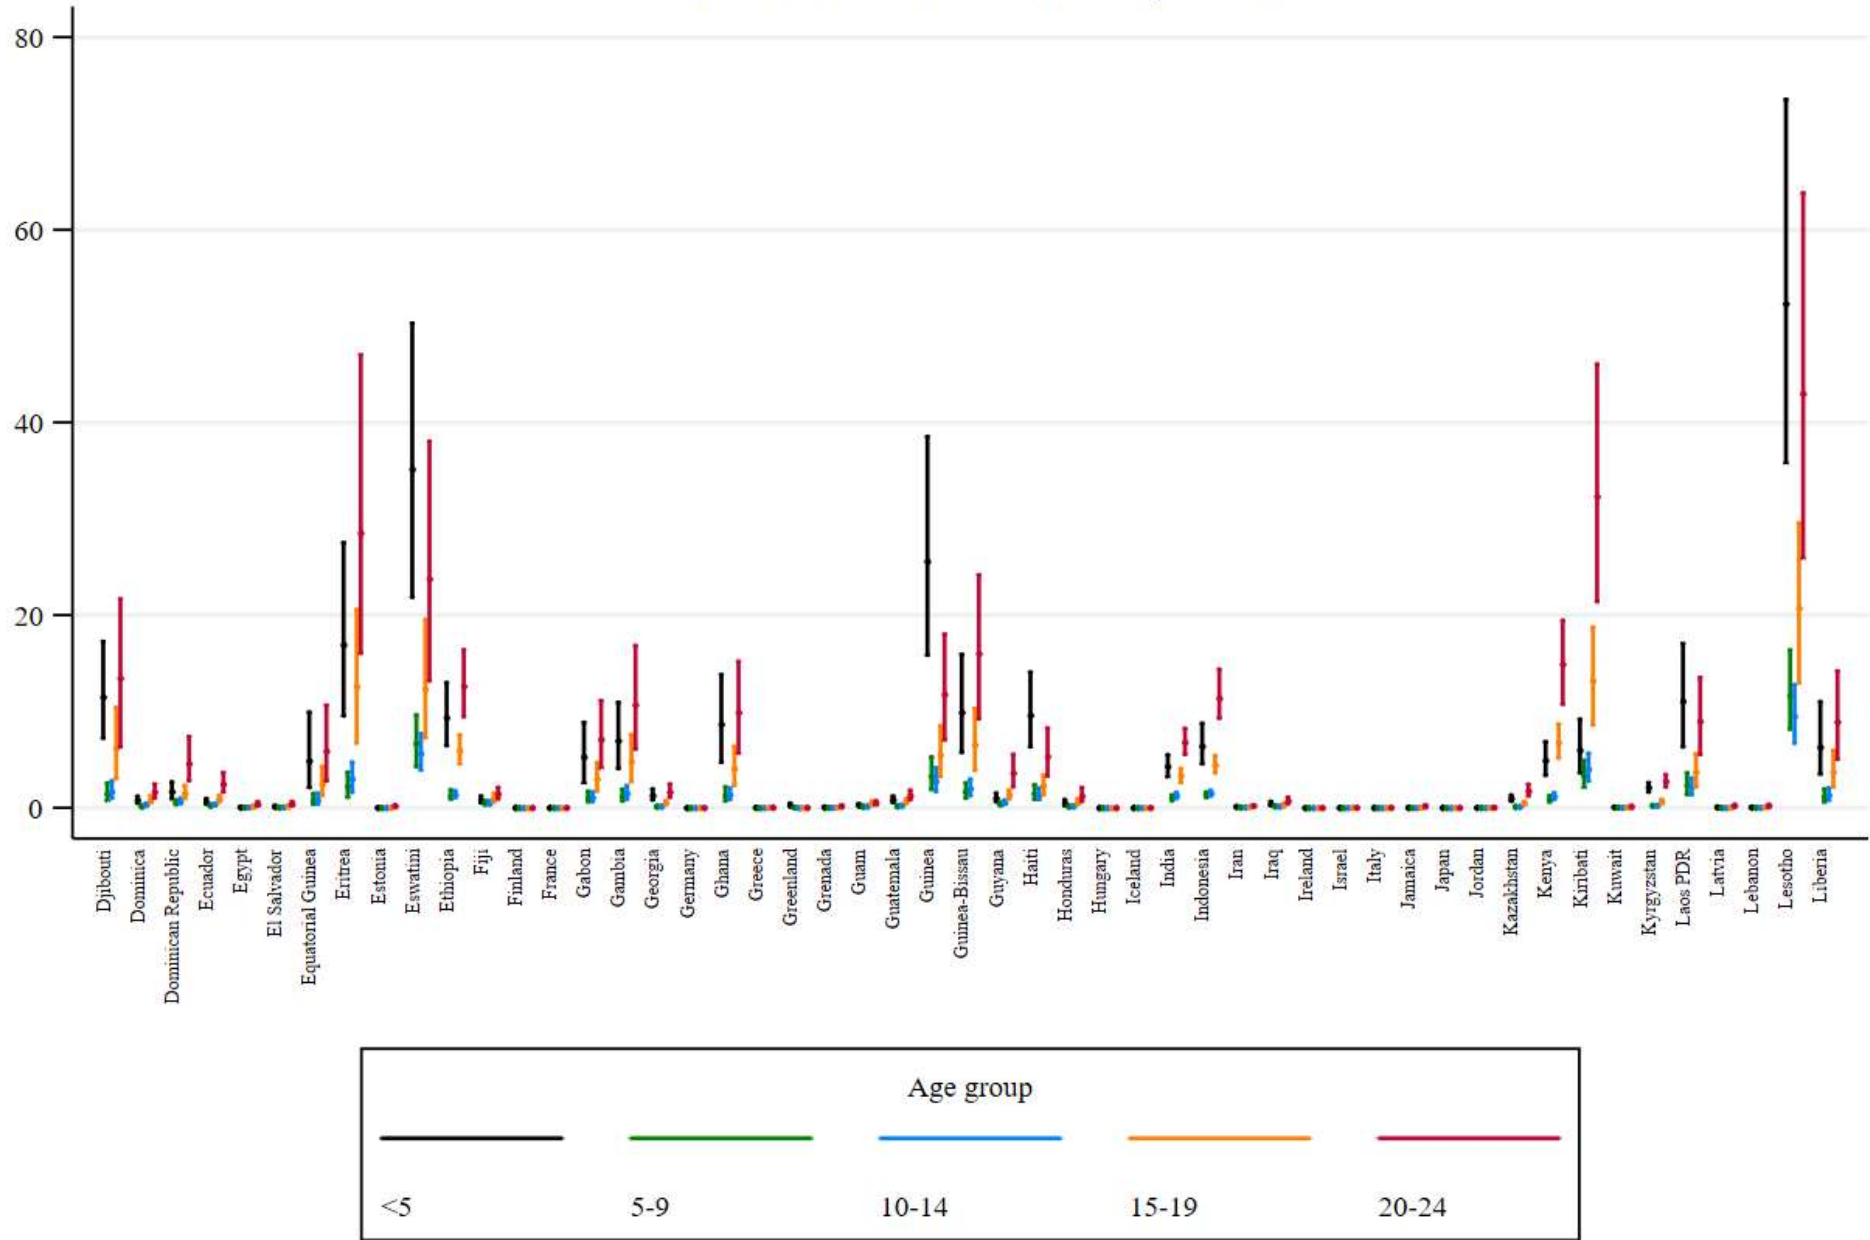

Tuberculosis: Deaths/100,000 Uncertainty interval

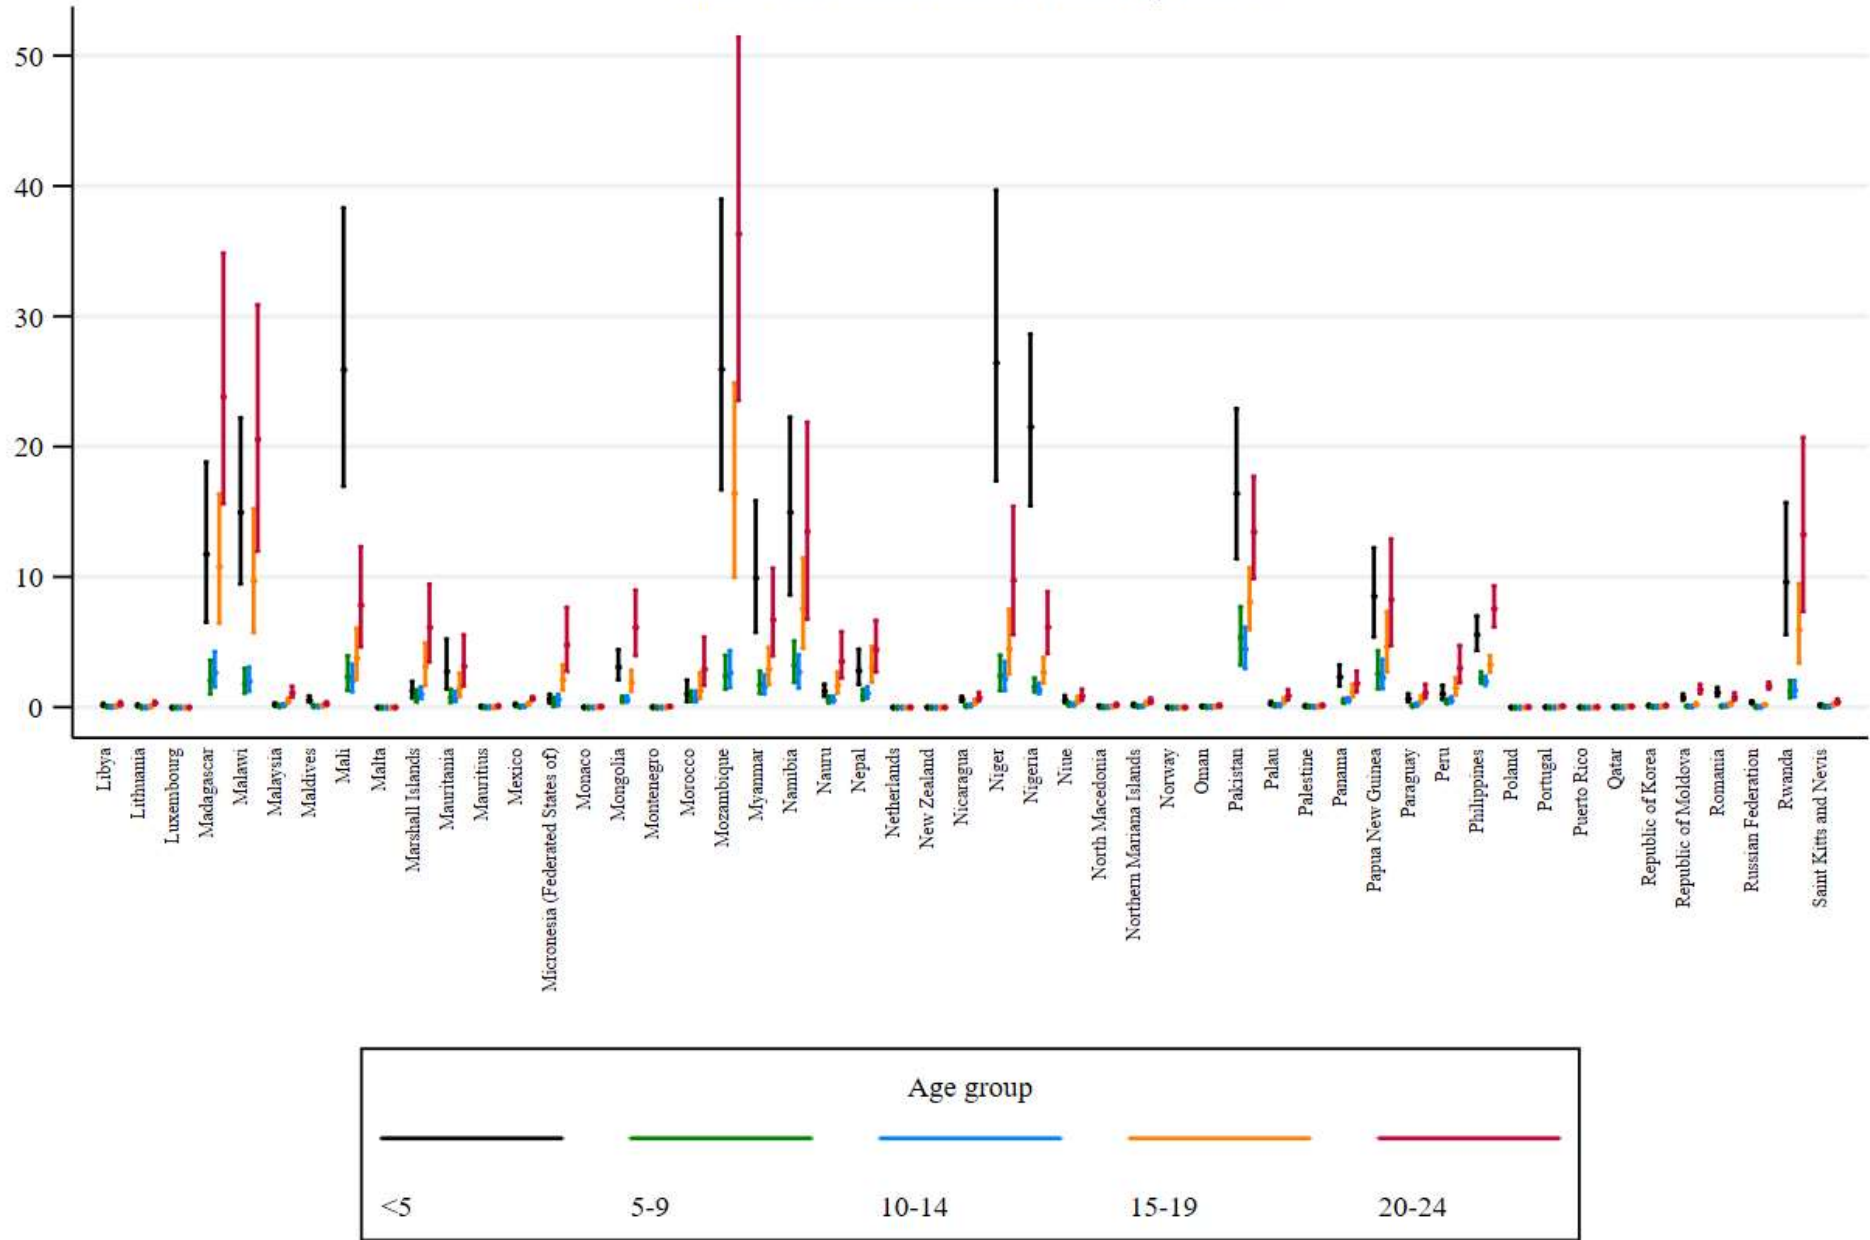

Tuberculosis: Deaths/100,000 Uncertainty interval

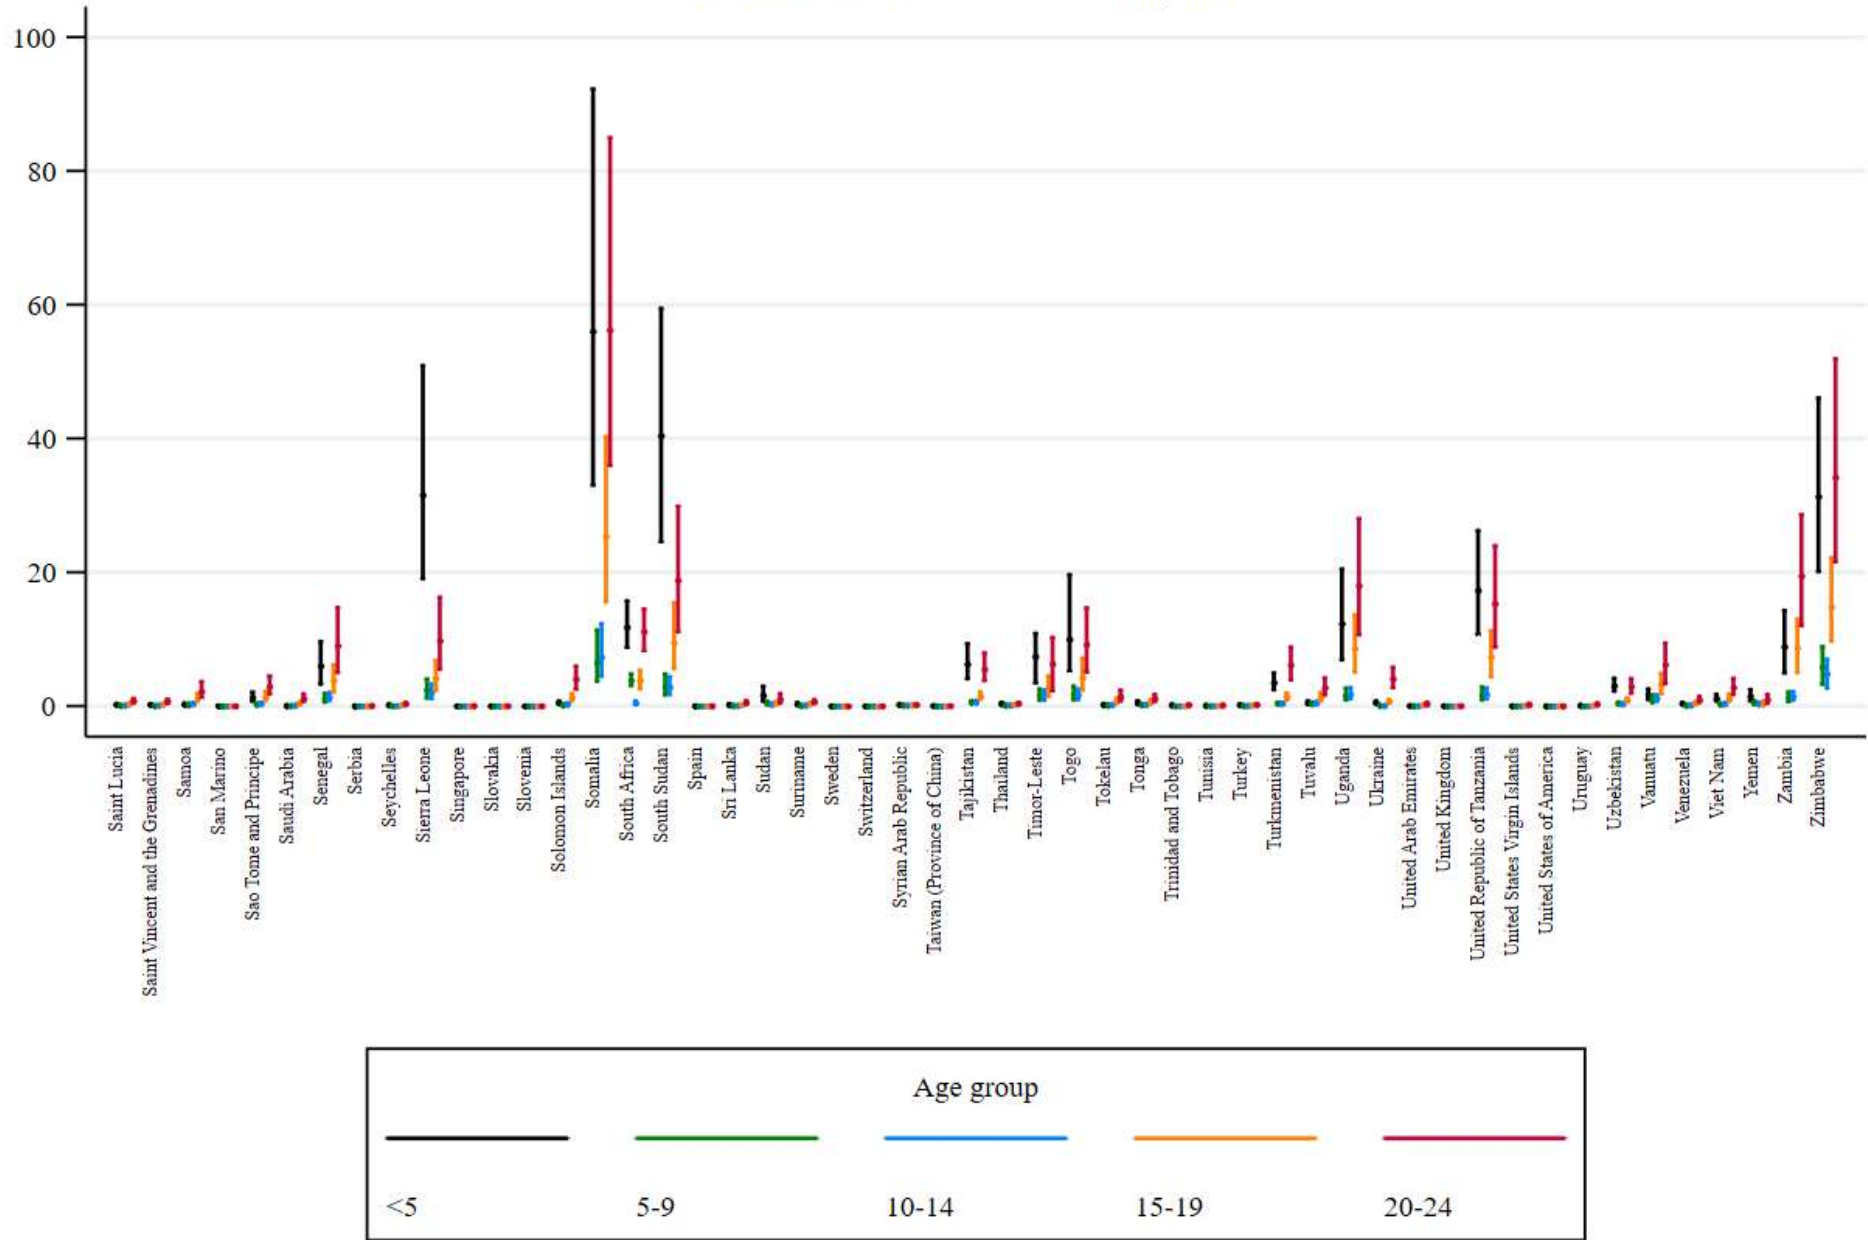

S20\_10 Part B: Tuberculosis DALYs/ 100 000 Uncertainty interval for each age group

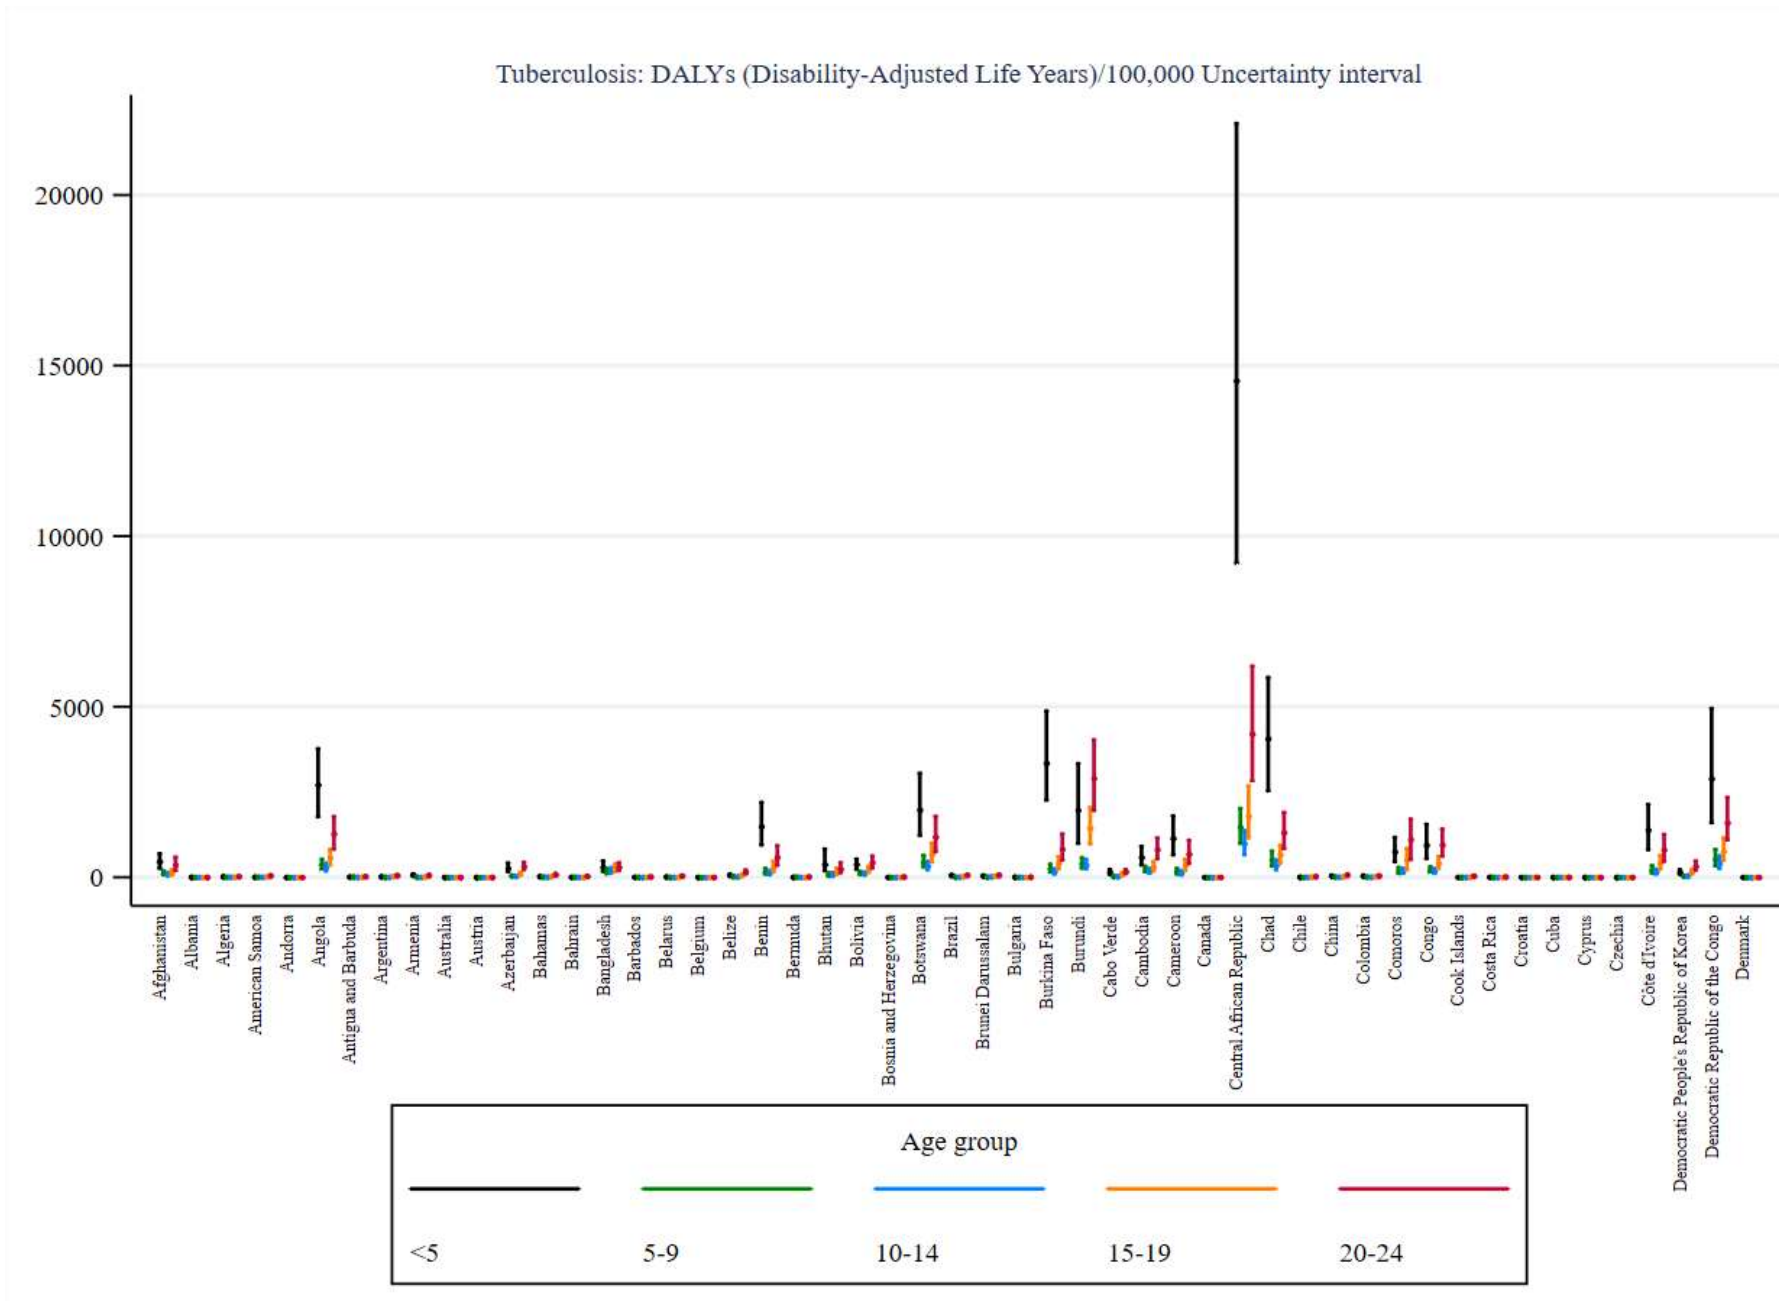

Tuberculosis: DALYs (Disability-Adjusted Life Years)/100,000 Uncertainty interval

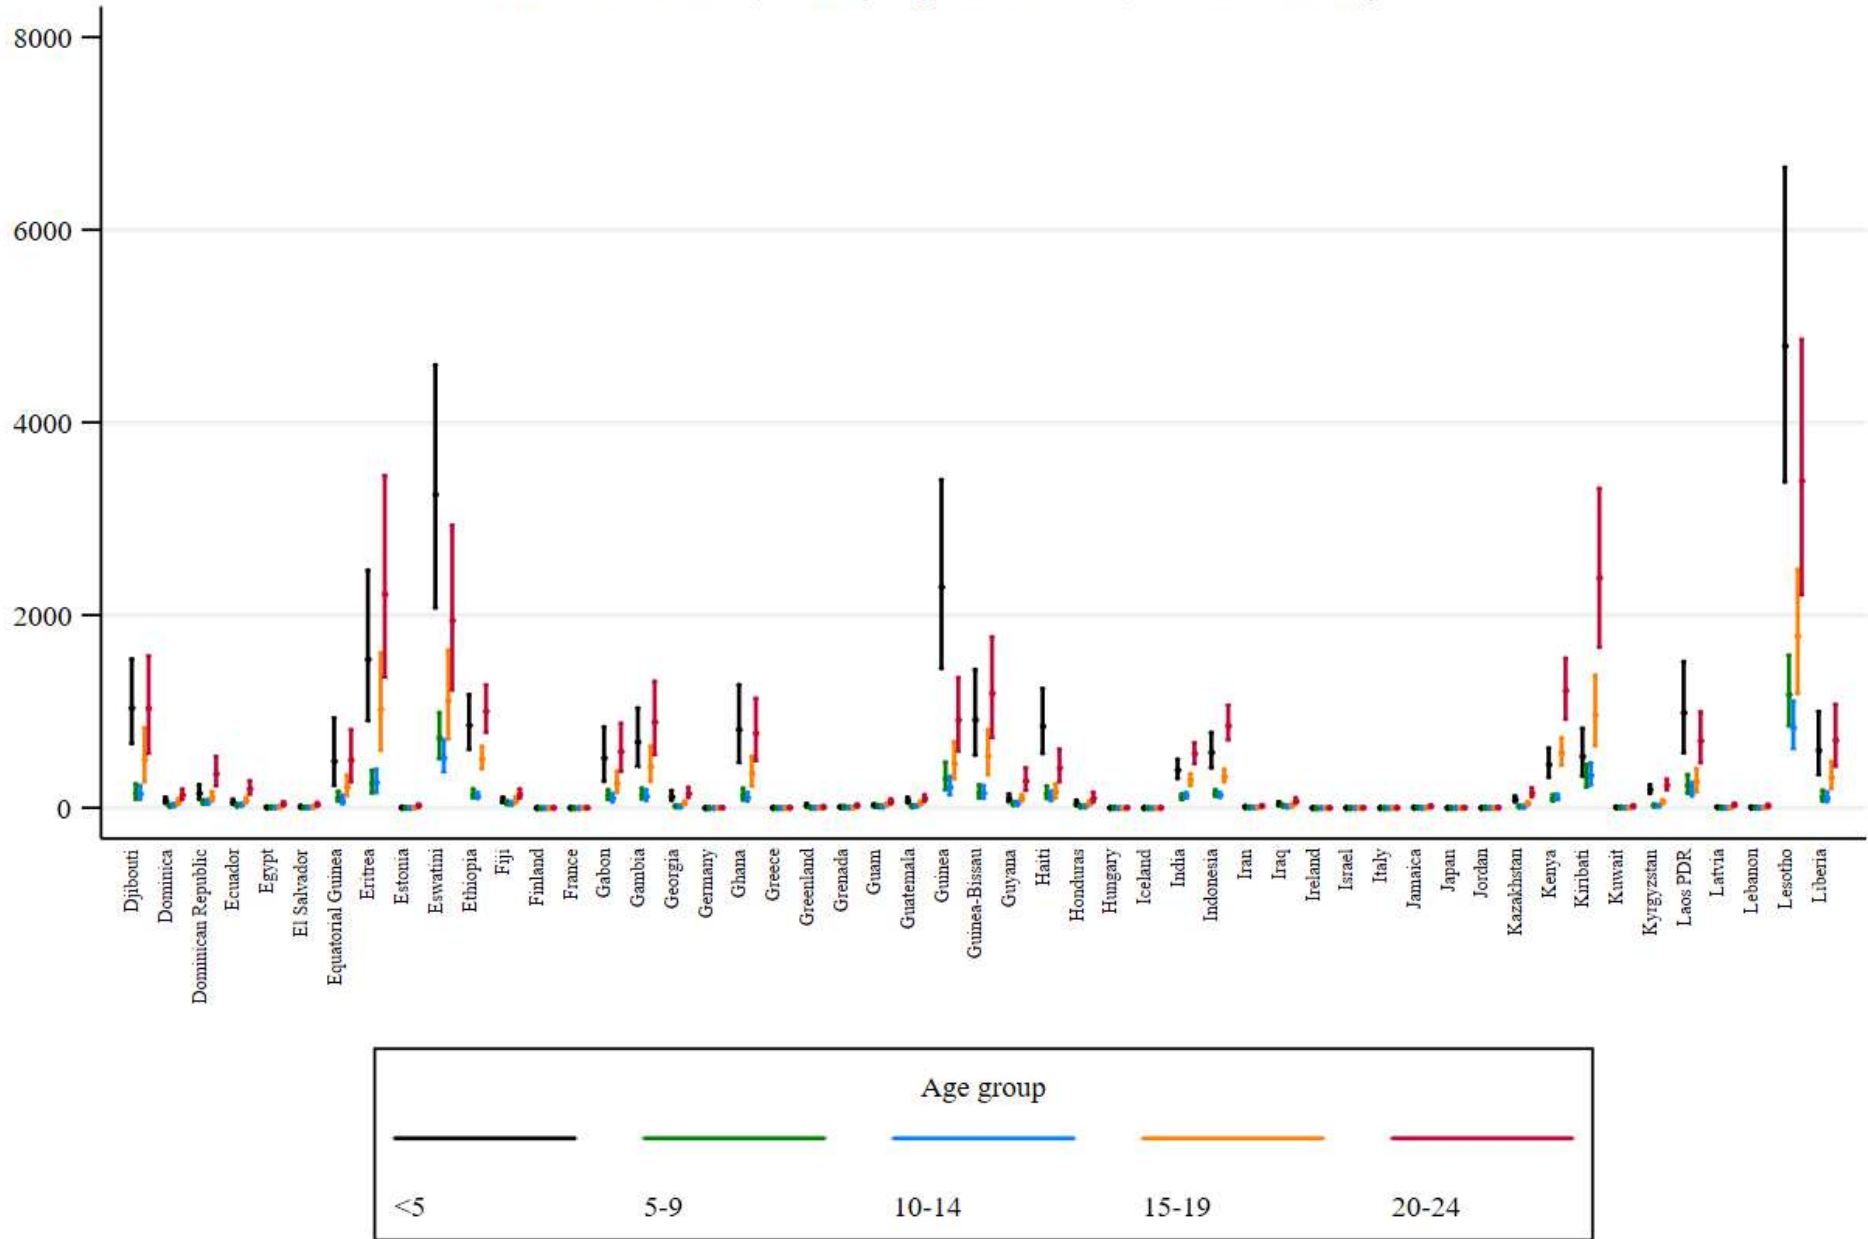



Tuberculosis: DALYs (Disability-Adjusted Life Years)/100,000 Uncertainty interval

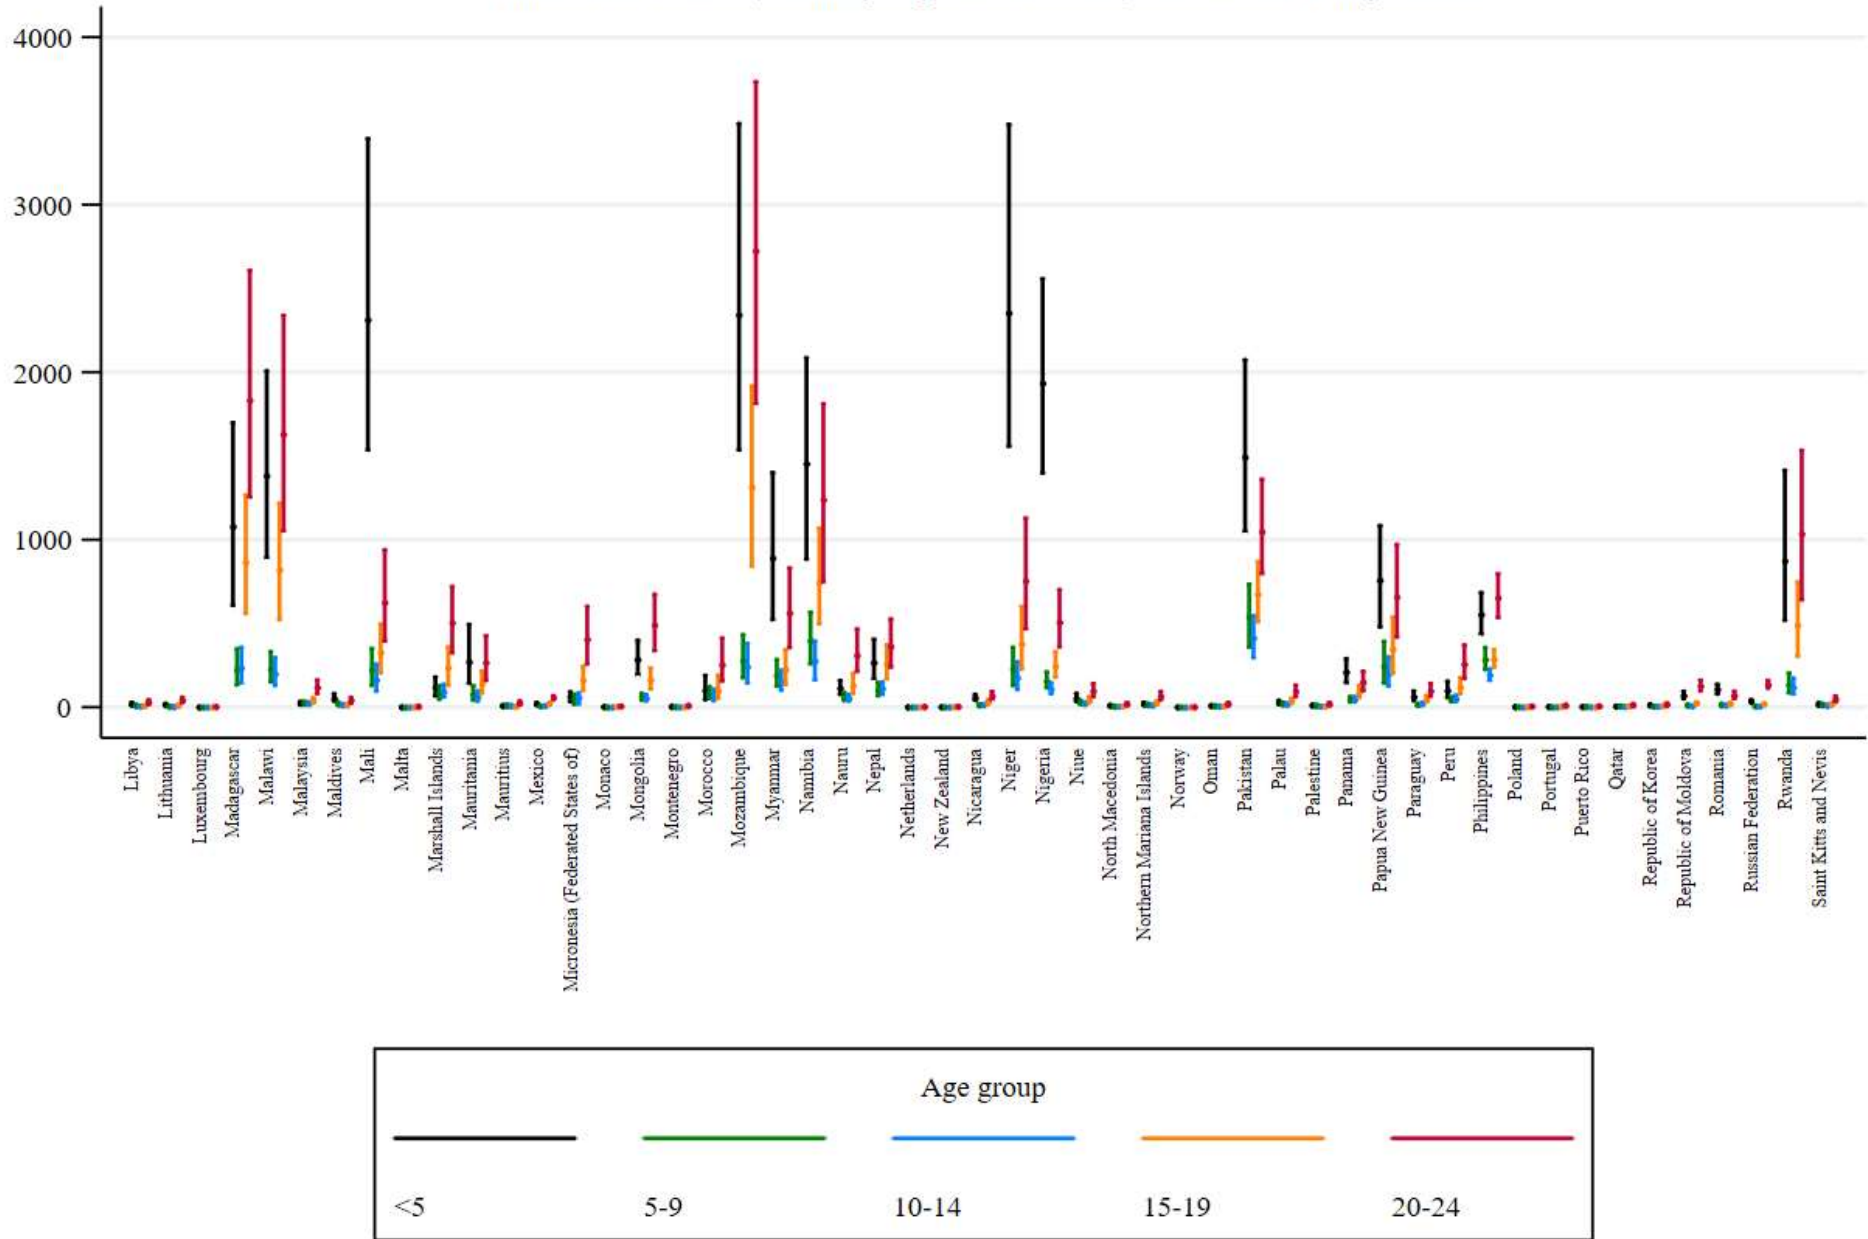

Tuberculosis: DALYs (Disability-Adjusted Life Years)/100,000 Uncertainty interval

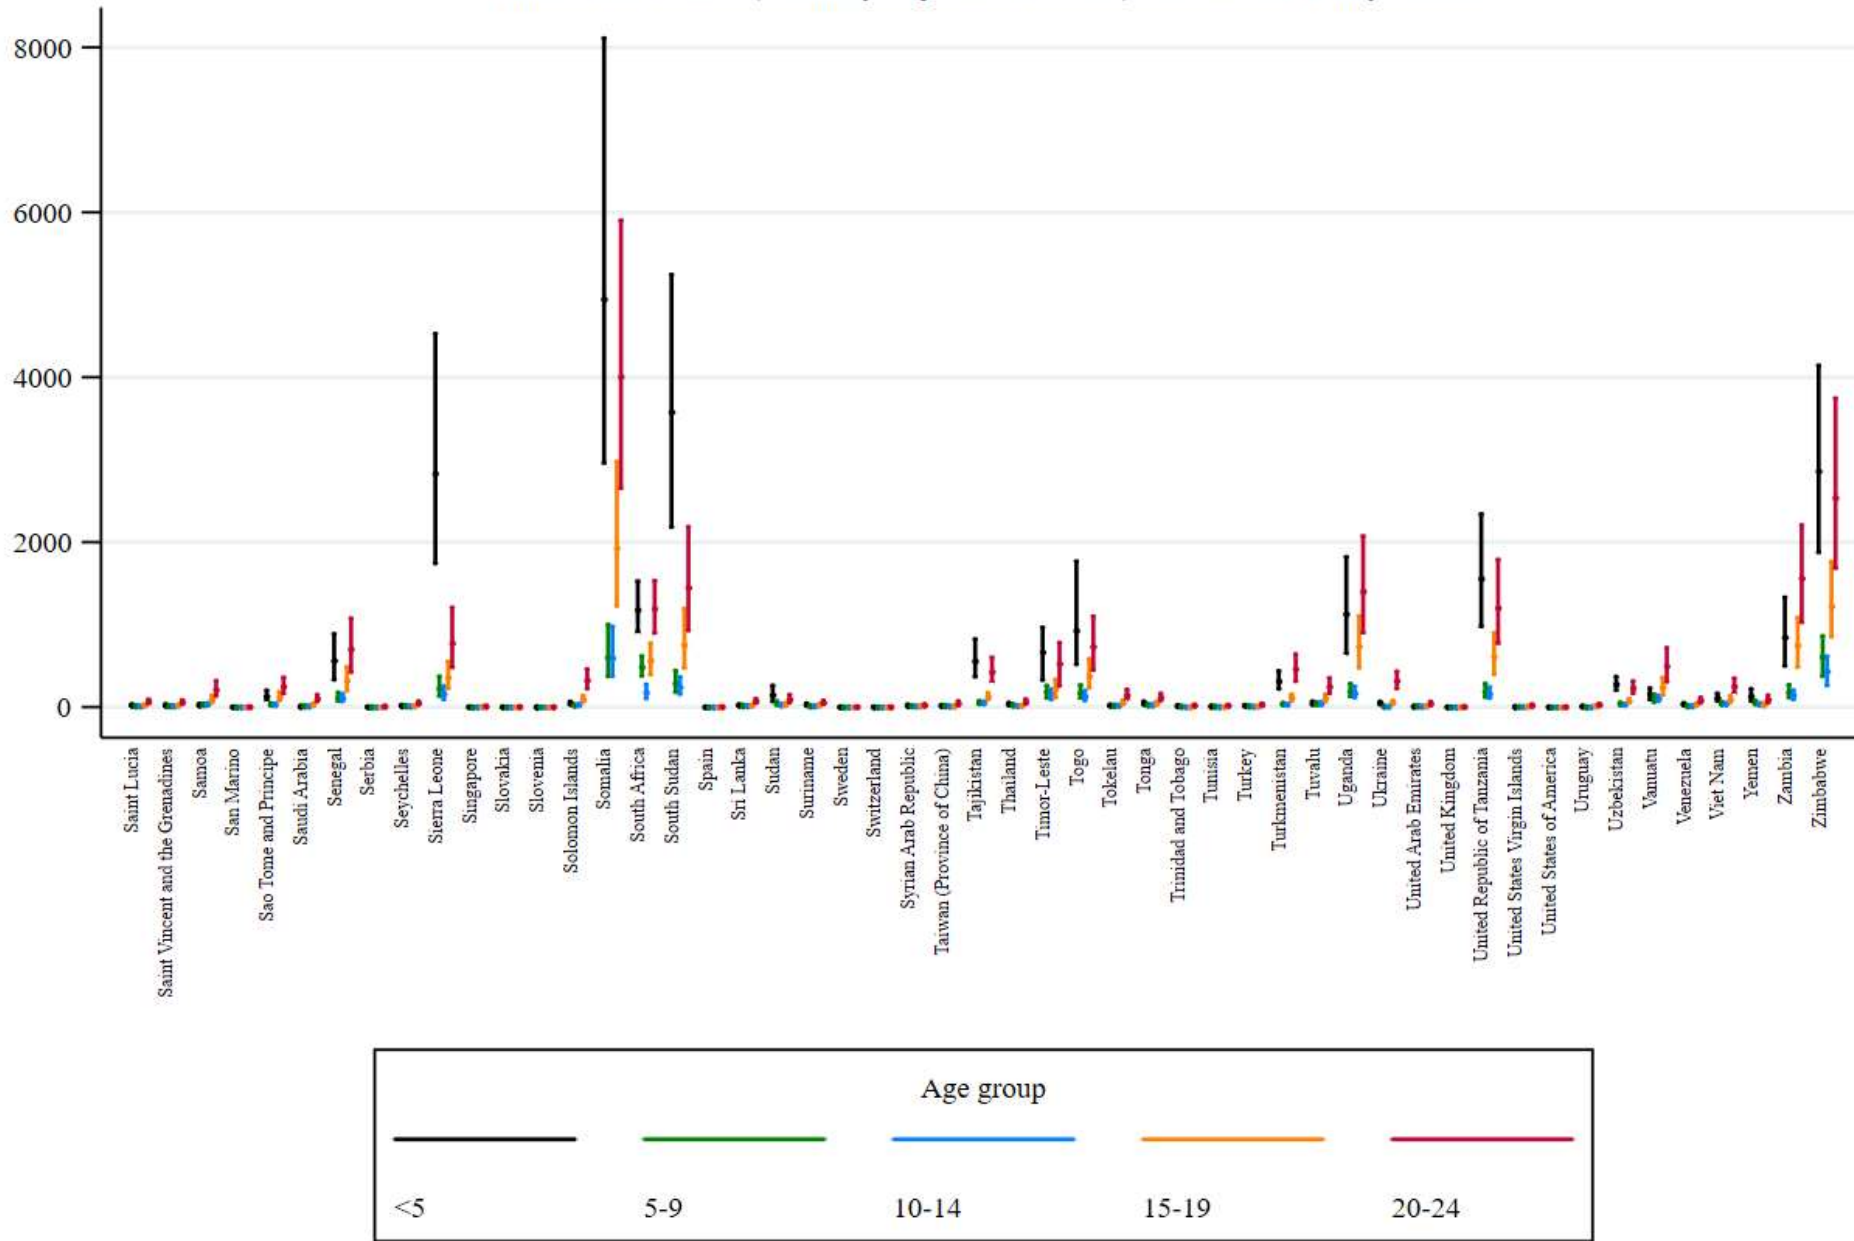

## **S21: Author contributions**

### **Writing the first draft of the manuscript**

Peter S Azzopardi, Jessica A Kerr, Kate Louise Francis, Susan M Sawyer, Elissa Clare Kennedy, Andrew C Steer, Stephen Michael Graham, Russell M Viner, Joseph L Ward, Julie Hennegan, Minh D Pham, Christine Marie D Habito, Jaameeta Kurji, Karly I Cini, James G Beeson, Alex Brown, Christopher J L Murray, Simon I Hay, and George C Patton.

### **Providing data or critical feedback on data sources**

Peter S Azzopardi, Kate Louise Francis, Russell M Viner, Joseph L Ward, Karly I Cini, James G Beeson, Christopher J L Murray, Hassan Abolhassani, Victor Adekanmbi, Muktar Beshir Ahmed, Tareq Mohammed Ali AL-Ahdal, Amir Anoushiravani, Davood Anvari, Jalal Arabloo, Seyyed Shamsadin Athari, Sara Bagherieh, Sandra Barteit, Sanjay Basu, Melaku Ashagrie Belete, Endeshaw Chekol Abebe, Natália Cruz-Martins, Xiaochen Dai, Lalit Dandona, Rakhi Dandona, Andreas K Demetriades, Alemayehu Anley Demlash, Mostafa Dianatinasab, Saeid Doaei, Fariba Dorostkar, Firooz Esmailzadeh, Ali Fatehizadeh, Getahun Fetensa, Santosh Gaihre, Lemma Getacher, Pouya Goleij, Mohamad Golitaleb, Vijai Kumar Gupta, Hadi Hassankhani, Demisu Zenbaba Heyi, Gaetano Isola, Jalil Jaafari, Jost B Jonas, Jacek Jerzy Jozwiak, Mikk Jürisson, Zubair Kabir, Rohollah Kalhor, Harkiran Kaur, Gbenga A Kayode, Mohammad Khammarnia, Moien AB Khan, Khaled Khatab, G Anil Kumar, Hmwe Hmwe Kyu, Stephen S Lim, Razzagh Mahmoudi, Fariborz Mansour-Ghanaei, Fereshteh Mehri, Awoke Misganaw, Abdollah Mohammadian-Hafshejani, Shafiu Mohammed, Ali H Mokdad, Lorenzo Monasta, Maryam Moradi, Ulrich Otto Mueller, Francesk Mulita, Getaneh Baye B Mulu, Ganesh R Naik, Henok Biresaw Netsere, Bogdan Oancea, Ayodipupo Sikiru Oguntade, Adrian Otoiu, Anamika Pandey, Shahina Pardhan, Romil R Parikh, Jay Patel, Prince Peprah, Maarten J Postma, Fakher Rahim, Vafa Rahimi-Movaghar, Salman Rawaf, Luca Ronfani, Siamak Sabour, Yashendra Sethi, Bogdan Socea, Mohammad Sadegh Soltani-Zangbar, Rafael Tabarés-Seisdedos, Razieh Tavakoli Oliabee, Amir Tiyyuri, Marcos Roberto Tovani-Palone, Abdul Rohim Tualeka, Jef Van den Eynde, Tommi Juhani Vasankari, Theo Vos, Ronny Westerman, Sanni Yaya, Iman Zare, Mohammad Zoladl, and Alimuddin Zumla.

### **Developing methods or computational machinery**

Peter S Azzopardi, Kate Louise Francis, Christopher J L Murray, Muktar Beshir Ahmed, Mostafa Akbarzadeh-Khiavi, Tareq Mohammed Ali AL-Ahdal, Shohreh Alian Samakkhah, Davood Anvari, Xiaochen Dai, Mostafa Dianatinasab, Saeid Doaei, Firooz Esmailzadeh, Ali Fatehizadeh, Mohammad Heidari, Mohammad Khammarnia, Razzagh Mahmoudi, Ali H Mokdad, Francesk Mulita, Koushik Roy Pramanik, Yashendra Sethi, Razieh Tavakoli Oliabee, Fei-Long Wei, and Ronny Westerman.

### **Providing critical feedback on methods or results**

Peter S Azzopardi, Jessica A Kerr, Kate Louise Francis, Susan M Sawyer, Elissa Clare Kennedy, Andrew C Steer, Stephen Michael Graham, Russell M Viner, Joseph L Ward, Julie Hennegan, Minh D Pham, Christine Marie D Habito, Jaameeta Kurji, Karly I Cini, James G Beeson, Alex Brown, Christopher J L Murray, Simon I Hay, George C Patton, Hassan Abolhassani, Victor Adekanmbi, Suneth Buddhika Agampodi, Muktar Beshir Ahmed, Hossein Akbarialiabad, Mostafa Akbarzadeh-Khiavi, Tareq Mohammed Ali AL-Ahdal, Musa Mohammed Ali, Yousef Alimohamadi, Vahid Alipour, Adel Al-Jumaily, Sohrab Amiri, Amir Anoushiravani, Davood Anvari, Jalal Arabloo, Morteza Arab-Zozani, Mesay Arkew, Benedetta Armocida, Ali A Asadi-Pooya, Zatollah Asemi, Seyyed Shamsadin Athari, Hiva Azami, Mohammadreza Azangou-Khyavy, Hosein Azizi, Nader Bagheri, Sara Bagherieh, Sandra Barteit, Sanjay Basu, Melaku Ashagrie Belete, Alemshet Yirga Berhie,

Ali Bijani, Boris Bikbov, Katrin Burkart, Periklis Charalampous, Endeshaw Chekol Abebe, Natália Cruz-Martins, Xiaochen Dai, Lalit Dandona, Rakhi Dandona, Sayih Mehari Degualem, Andreas K Demetriades, Alemayehu Anley Demlash, Abebaw Alemayehu Desta, Mostafa Dianatinasab, Saeid Doaei, Fariba Dorostkar, Diyan Ermawan Effendi, Amir Emami, Luchuo Engelbert Bain, Firooz Esmaeilzadeh, Ali Faramarzi, Ali Fatehizadeh, Pietro Ferrara, Getahun Fetensa, Florian Fischer, Luisa S Flor, Masoud Foroutan, Santosh Gaihre, Nasrin Galehdar, Rupesh K Gautam, Mesfin Gebrehiwot, Teferi Gebru Gebremeskel, Motuma Erena Getachew, Mohammad Ghasemi Nour, Mohamad Golitaleb, Vijai Kumar Gupta, Hadi Hassankhani, Demisu Zenbaba Heyi, Gaetano Isola, Jalil Jaafari, Fatemeh Javanmardi, Jost B Jonas, Jacek Jerzy Jozwiak, Mikk Jürisson, Ali Kabir, Zubair Kabir, Laleh R Kalankesh, Rohollah Kalhor, Joonas H Kauppila, Harkiran Kaur, Gbenga A Kayode, Leila Keikavoosi-Arani, Mohammad Khammarnia, Moien AB Khan, Khaled Khatab, Hamid Reza Khayat Kashani, Ali-Asghar Kolahi, Hamid Reza Koohestani, Ai Koyanagi, G Anil Kumar, Om P Kurmi, Hmwe Hmwe Kyu, Carlo La Vecchia, Tea Lallukka, Stephen S Lim, Joana A Loureiro, Razzagh Mahmoudi, Azeem Majeed, Elaheh Malakan Rad, Fariborz Mansour-Ghanaei, Abdoljalal Marjani, Alexander G Mathioudakis, Alexios-Fotios A Mentis, Tomislav Mestrovic, Andreea Mirica, Awoke Misganaw, Abdollah Mohammadian-Hafshejani, Shafiu Mohammed, Ali H Mokdad, Peyman Mokhtarzadehazar, Maryam Moradi, Maliheh Moradzadeh, Negar Morovatdar, Ulrich Otto Mueller, Francesk Mulita, Getaneh Baye B Mulu, Saravanan Muthupandian, Ganesh R Naik, Abdulqadir J J Nashwan, Seyed Aria Nejadghaderi, Henok Biresaw Netsere, Maryam Noori, Bogdan Oancea, Ayodipupo Sikiru Oguntade, Hassan Okati-Aliabad, Adrian Otoiu, Anamika Pandey, Shahina Pardhan, Romil R Parikh, Jay Patel, Prince Peprah, Maarten J Postma, Fakher Rahim, Vafa Rahimi-Movaghar, Shayan Rahmani, Vahid Rahmanian, Salman Rawaf, Iman Razeghian-Jahromi, Misganu Teshoma Regasa, Mohsen Rezaeian, Abanoub Riad, Esperanza Romero-Rodríguez, Koushik Roy Pramanik, Siamak Sabour, Saeid Sadeghian, Mohammad Reza Saeb, Azam Safary, Biniyam Sahiledengle, Sara Samadzadeh, Arash Sarveazad, Yashendra Sethi, Saeed Shahabi, Mehran Shams-Beyranvand, Kiomars Sharafi, Nigussie Tadesse Sharew, Aziz Sheikh, Rahim Ali Sheikhi, Rahman Shiri, Bogdan Socea, Mohammad Sadegh Soltani-Zangbar, Rafael Tabarés-Seisdedos, Shima Tabatabai, Moslem Taheri Soodejani, Raziheh Tavakoli Oliaee, Amir Tiyyuri, Marcos Roberto Tovani-Palone, Jef Van den Eynde, Theo Vos, Mandaras Tariku Walde, Yanzhong Wang, Fei-Long Wei, Ronny Westerman, Vikas Yadav, Sanni Yaya, Bin Zhu, Mohammad Zoladl, and Alimuddin Zumla.

#### [Drafting the work or revising is critically for important intellectual content](#)

Peter S Azzopardi, Jessica A Kerr, Kate Louise Francis, Susan M Sawyer, Elissa Clare Kennedy, Andrew C Steer, Stephen Michael Graham, Russell M Viner, Joseph L Ward, Julie Hennegan, Minh D Pham, Christine Marie D Habito, Jaameeta Kurji, Karly I Cini, James G Beeson, Alex Brown, Christopher J L Murray, Simon I Hay, George C Patton, Mohsen Abbasi-Kangevari, Hassan Abolhassani, Victor Adekanmbi, Suneth Buddhika Agampodi, Muktar Beshir Ahmed, Marjan Ajami, Hossein Akbarialiabad, Tareq Mohammed Ali AL-Ahdal, Musa Mohammed Ali, Shohreh Alian Samakkhah, Sohrab Amiri, Mohammad Hosein Amirzade-Iranaq, Jalal Arabloo, Morteza Arab-Zozani, Mesay Arkew, Benedetta Armocida, Ali A Asadi-Pooya, Saeed Asgary, Seyyed Shamsadin Athari, Hiva Azami, Mohammadreza Azangou-Khyavy, Nader Bagheri, Sara Bagherieh, Francesco Barone-Adesi, Sanjay Basu, Melaku Ashagrie Belete, Luis Belo, Boris Bikbov, Giulia Carreras, Natália Cruz-Martins, Andreas K Demetriades, Mostafa Dianatinasab, Saeid Doaei, Firooz Esmaeilzadeh, Ali Faramarzi, Ali Fatehizadeh, Pietro Ferrara, Florian Fischer, Ali Forouhari, Masoud Foroutan, Santosh Gaihre, Nasrin Galehdar, Silvano Gallus, Teferi Gebru Gebremeskel, Lemma Getacher, Motuma Erena Getachew, Seyyed-Hadi Ghamari, Mohammad

Ghasemi Nour, Mohamad Golitaleb, Giuseppe Gorini, Maryam Hashemian, Mohammad Heidari, Demisu Zenbaba Heyi, Gaetano Isola, Jost B Jonas, Jacek Jerzy Jozwiak, Mikko Jürisson, Ali Kabir, Laleh R Kalankesh, Joonas H Kauppila, Gbenga A Kayode, Mohammad Khammarnia, Moien AB Khan, Khaled Khatab, Ai Koyanagi, Om P Kurmi, Carlo La Vecchia, Tea Lallukka, Joana A Loureiro, Soleiman Mahjoub, Razzagh Mahmoudi, Azeem Majeed, Elaheh Malakan Rad, Afshin Maleki, Abdoljalal Marjani, Alexander G Mathioudakis, Alexios-Fotios A Mentis, Tomislav Mestrovic, Awoke Misganaw, Abdollah Mohammadian-Hafshejani, Hussien Mohammed, Shafiu Mohammed, Ali H Mokdad, Peyman Mokhtarzadehazar, Lorenzo Monasta, Maryam Moradi, Maliheh Moradzadeh, Negar Morovatdar, Ulrich Otto Mueller, Getaneh Baye B Mulu, Seyed Aria Nejadghaderi, Nurulamin M Noor, Bogdan Oancea, Adrian Otoiu, Alicia Padron-Monedero, Reza Pakzad, Shahina Pardhan, Romil R Parikh, Jay Patel, Umberto Pensato, Norberto Perico, Dimitri Poddighe, Maarten J Postma, Fakher Rahim, Vafa Rahimi-Movaghar, Shayan Rahmani, Vahid Rahmanian, Salman Rawaf, Iman Razeghian-Jahromi, Misganu Teshoma Regasa, Giuseppe Remuzzi, Abanoub Riad, Esperanza Romero-Rodríguez, Luca Ronfani, Koushik Roy Pramanik, Siamak Sabour, Amirhossein Sahebkar, Biniyam Sahiledengle, Sara Samadzadeh, Yashendra Sethi, Saeed Shahabi, Fariba Shahraki-Sanavi, Mehran Shams-Beyranvand, Bogdan Socea, Shima Tabatabai, Razieh Tavakoli Oliaee, Marcos Roberto Tovani-Palone, Rohollah Valizadeh, Jef Van den Eynde, Tommi Juhani Vasankari, Yanzhong Wang, Fei-Long Wei, Ronny Westerman, Vikas Yadav, Iman Zare, Bin Zhu, Mohammad Zoladl, and Alimuddin Zumla.

#### [Managing the estimation or publications process](#)

Peter S Azzopardi, Kate Louise Francis, Susan M Sawyer, Christine Marie D Habito, Karly I Cini, Christopher J L Murray, Simon I Hay, George C Patton, Saeid Doaei, Firooz Esmaeilzadeh, Ali Fatehizadeh, Gaetano Isola, Razzagh Mahmoudi, Ali H Mokdad, and Razieh Tavakoli Oliaee.
